# Supplementary material
Source: HighWire-hosted journal article supplement (doi:10.1101/rna.079714.123)
Supplement: Supplemental_Figure_Legends.docx [file Supplemental_Figure_Legends.docx]

**Supplementary figures**

**Supplemental Figure 1. Gel-based size selection steps of the infrared PAR-CLIP protocol. A.** Schema of the IR-PAR-CLIP library. The crosslinked RNA fragment is ligated to the infra-red dye-conjugated 3’ adapter containing a 5 nt unique molecular identifier (UMI) and a sample barcode (BC). The complementary strand is transcribed using the reverse transcription (RT) primer complementary to the adapter sequence and containing an 18-atom hexa-ethyleneglycol spacer (Sp18). The library is amplified in a PCR reaction with the indexed primers. The use of the Unique Dual Index barcodes is recommended (BC 1, BC 2). **B.** SDS-PAGE of the RNA-IGF2BP3 complexes after infrared adapter ligation. Different RNase conditions are tested and immunoprecipitation of IGF2BP3 is compared to the IgG control. Note that higher in-lysate concentration of RNase results in a higher output of eluted complexes. **C.** TBE-Urea gel of the recovered RNA-adapter fragments crosslinked to the protein remnant left after proteinase K treatment. *RNA-protein complexes insufficiently digested with proteinase K (as we did not observe these bands when the proteinase K-treated peptide-RNA-adapter complexes were purified with electroelution before the RNA gel), ** unligated adapter. **D.** TBE-Urea gel of the reverse transcription reaction product. Although the reverse transcription product is hardly visible on SYBR-Gold stained gel, this step is important to separate the product from * the unreacted primer. **E.** TBE gel of the library construction PCR product. The libraries obtained with anti-IGF2BP3 antibody were amplified with 18 PCR cycles, while the IgG control library was amplified with 23 cycles. * no-insert product, ** unreacted primers. Brackets show the region excised from the gel.

**Supplemental Figure 2. Effect of RNase concentration on IR-PAR-CLIP coverage, motif, and target prediction results. A.** 4-nucleotide IGF2BP3-binding motifs identified by HOMER in IR-PAR-CLIP of HCT116. **B.** Overlap of IGF2BP3 targets identified in this study with different RNase I and RNase T1 treatment conditions. **C.** Pearson correlation matrix of the IGF2BP3 IR-PAR-CLIP coverage for the tested RNase I and RNase T1 treatment conditions.
