# Supplementary material
Source: HighWire-hosted journal article supplement (doi:10.1101/rna.079714.123)
Supplement: Supplemental_Material.docx [file Supplemental_Material.docx]

Supplementary materials file for

**Optimized infrared photoactivatable ribonucleoside-enhanced crosslinking and immunoprecipitation (IR-PAR-CLIP) protocol identifies novel IGF2BP3-interacting RNAs in colon cancer cells**

Aleksandra Anisimova1,2, G Elif Karagöz1,3.*

1. Max Perutz Laboratories Vienna, Vienna BioCenter (VBC), Vienna, Austria.
2. Vienna BioCenter PhD Program, Doctoral School of the University of Vienna and Medical University of Vienna, Vienna, Austria.
3. Medical University of Vienna, Center for Medical Biochemistry, Vienna, Austria.

*: correspondence to: guelsuen.karagoez@meduniwien.ac.at

Content

Detailed IR-PAR-CLIP Protocol

Supplementary methods: paralyzer.ini file

**IR-PAR-CLIP Protocol**

The infrared photoactivatable ribonucleoside-enhanced crosslinking and immunoprecipitation (IR-PAR-CLIP) protocol described below is designed for the isolation and sequencing of RNA fragments interacting with the protein of interest. The protocol is optimized on the example of immunoprecipitation of the endogenous IGF2BP3 from the human colorectal carcinoma cell line (HCT116) and provides the framework for i. optimization of immunoprecipitation conditions for other endogenous proteins. ii. optimization of RNase treatment conditions. iii. labeling RNA fragments with infrared 3’ adapters for visualization of RNA-protein complexes. iv. application of a single adapter strategy in combination with circular ligation. The crosslinking, proteinase treatment, and size selection parts of the protocol are based on the published PAR-CLIP protocol (Hafner et al. 2010b; Danan, Manickavel, and Hafner 2016), the ligation of the infrared 3’ adapter is adapted from irCLIP methods (Zarnegar et al. 2016), and the library preparation strategy from iCLIP (König et al. 2010) and ribosome profiling protocols (Ingolia et al. 2009; Ingolia 2010; McGlincy and Ingolia 2017).

The overview of the protocol is shown in Fig. 1.

**Materials**

| Material | Manufacturer | Cat. number | |
| --- | --- | --- | --- |
| McCoy's 5A (Modified) Medium with L-Glutamine | Sigma-Aldrich | M9309 | |
| Fetal Bovine Serum | Gibco | 10437028 | |
| L-Glutamine solution, 200 mM | Sigma-Aldrich | G7513 | |
| Penicillin-Streptomycin | Sigma-Aldrich | P0781 | |
| Phosphate Buffered Saline | Sigma-Aldrich | D8537 | |
| 4-Thiouridine, ≥98% | Sigma-Aldrich | T4509 | |
| HEPES pH 7.3, 1 M | Thermo Fisher Scientific | BP299100 | |
| Tris-(hydroxymethyl)-aminomethane | Scharlab | TR0423005P | |
| HCl, ≥37% | Sigma-Aldrich | 30721-M | |
| NaCl, 5M | Promega | V4221 | |
| Nonidet P 40 Substitute | Sigma-Aldrich | 74385 | |
| EDTA pH 8.0, 0.5 M | Invitrogen | AM9260G | |
| Glycerol, ≥99% | Sigma-Aldrich | G6279 | |
| Sodium Deoxycholate | Sigma-Aldrich | D6750 | |
| Tween 20 | Sigma-Aldrich | P7949 | |
| MgCl2, 1 M | Invitrogen | AM9530G | |
| Complete™, EDTA-free Protease Inhibitor Cocktail | Sigma-Aldrich | 05056489001 | |
| Dithiothreitol (DTT) | BioChemica | A1101,0025 | |
| peqGOLD TriFast™ - DNA/RNA/protein extraction reagent | VWR | 30-2010 | |
| RNase T1 | Thermo Fisher Scientific | EN0541 | |
| RNase I | Invitrogen | AM2294 | |
| Anti-IGF2BP3 antibody | Proteintech | 14642-1-AP, lot 00090203 |
| IgG control antibody | Proteintech | 30000-0-AP |
| Dynabeads™ Protein G for Immunoprecipitation | Invitrogen | 10004D |
| T4 polynucleotide kinase (10 U/µL) | New England Biolabs | M0201L |
| SUPERase·In (20 U/µL) | Thermo Fisher Scientific | AM2694 |
| RNase-free water | MP Biomedicals | 04821932 |
| T4 RNA Ligase 2, truncated KQ (200 U/μL)  *Supplied with 10x T4 RNA Ligase Reaction Buffer and 50% PEG8000 | New England Biolabs | M0373L |
| 4-12% NuPAGE Novex Bis-Tris gel | Invitrogen | NP0321BOX |
| NuPAGE MOPS SDS Running Buffer (20X) | Invitrogen | NP0001 |
| iBright™ Prestained Protein Ladder | Thermo Fisher Scientific | LC5615 |
| IRdye-800CW-DBCO | LiCor | 929-50000 |
| Proteinase K (20 mg/mL), RNA grade | Invitrogen | 25530049 |
| Acid-Phenol:Chloroform, pH 4.5 (with isoamyl alcohol (IAA), 125:24:1) | Invitrogen | AM9720 |
| Chloroform | Sigma-Aldrich | C2432-1L |
| Glycogen, RNA grade | Thermo Fisher Scientific | R0551 |
| 2-Propanol | Sigma-Aldrich | 59304-500ML-F |
| 15% TBE-Urea gel | Invitrogen | EC6885BOX |
| 10% TBE-Urea gel | Invitrogen | EC6875BOX |
| 6% TBE gel | Invitrogen | EC6265BOX |
| Ultrapure TBE Buffer (10X) | Invitrogen | 15581044 |
| Low Range ssRNA Ladder | New England Biolabs | N0364S |
| SYBR gold | Invitrogen | S11494 |
| GlycoBlue | Invitrogen | AM9516 |
| Ethanol absolute | Sigma-Aldrich | 1009831011 |
| Superscript IV (200 U/μL) * Supplied with 5x Superscript IV buffer, dNTP mix (10 mM each), DTT (100 mM) | Invitrogen | 18090050 |
| Oligo Clean & Concentrator columns | Zymo Research | D4060 |
| TBE-Urea dye (2x) | Invitrogen | LC6876 |
| CircLigase II (100 U/ µL)  * Supplied with 10X CircLigase buffer, 5 M Betaine, and 50 mM MnCl2. | Lucigen | CL9021K |
| NEB Index primer kit * newer version of this product containing Unique Dual Indexes is available (E6440S) | New England Biolabs | E6609S |
| Phusion polymerase (2 U/ µL)  * Supplied with 5X HF buffer | New England Biolabs | M0530S |
| Sodium Acetate (3 M), pH 5.5, RNase-free | Invitrogen | AM9740 |
| High Sensitivity DNA Kit & Reagents | Agilent Technologies | 5067-4626 |
|  |  |  |
| Hypodermic needles 27G | Microlance | 613-3834 |
| 2 mL RNase-free tube, DNA low bind | Eppendorf | 0030108078 |
| 1.5 mL RNase-free tube, DNA low bind | Eppendorf | 0030108051 |
| 8-strip PCR tubes | STARLAB | A1402-3800 |
| 15 mL falcon tubes | Falcon | 352096 |
| RNase-free razor blades | Fisherbrand | 15316558 |
| RNase-free pellet pestle | Fisherbrand | 13236679 |
| Costar Spin-X Centrifuge Tube Filters, 0.22µm Pore CA | Sigma-Aldrich | CLS8160-96EA |
|  |  |  |
| Table top centrifuge 5424 R | Eppendorf | 022620401 |
| DynaMag-2 Magnet rack | Invitrogen | 12321D |
| Tube Revolver Rotator | Thermo Fisher Scientific | 88881002 |
| ThermoMixer C | Eppendorf | 5382000015 |
| XCell SureLock™ Mini-Cell gel chamber | Invitrogen | EI0001 |
|  |  |  |

**Equipment**

ChemiDoc Touch Gel Imaging System, BioRad

UV Crosslinker Stratalinker 2400, Stratagene

Odyssey CLx infrared imager, LiCor

Agilent bioanalyzer 2100, Agilent technologies

**Buffer recipes**

**Lysis buffer:** 25 mM HEPES pH 7.3, 150 mM NaCl, 0.5% NP-40, 0.5 mM EDTA, 10% Glycerol, 0.1% SDS, 0.2% Sodium Deoxycholate, 1x protease inhibitors cocktail, 0.1mM DTT

Prepare fresh.

**High salt wash buffer:** 25 mM HEPES pH 7.3, 400 mM NaCl, 0.5% NP-40, 0.5 mM EDTA, 10% Glycerol, 1x protease inhibitors cocktail, 0.1mM DTT

Prepare fresh.

**PNK wash buffer:** 20 mM Tris-HCl pH 6.5, 10 mM MgCl2, 0.2% Tween20, 0.1mM DTT

Filter sterilize and prepare single-use aliquots. Store at -20°C.

**5x PNK buffer:** 350 mM Tris-HCl pH 6.5, 50 mM MgCl2, 5 mM DTT

Add DTT before use.

**4x SDS sample buffer:** 200 mM Tris-HCl pH 6.8, 8% SDS, 0.4% Bromophenol blue, 40% glycerol

**2x proteinase K buffer:** 100 mM HEPES pH 7.3, 100 mM NaCl, 20 mM EDTA, 2% SDS

**RNA elution buffer:** 10mM Tris-HCl pH 7.0, .3 M NaOAc pH 5.5, 2mM EDTA

**DNA elution buffer:** 10 mM Tris-HCl pH 8.0, 0.3 M NaOAc pH 5.5

**Oligonucleotides**

**Reverse transcription primer**

/5Phos/RNAGATCGGAAGAGCGTCGTGTAGGGAAAGAG/iSp18/GTGACTGGAGTTCAGACGTGTGCTC

Modifications: /5Phos/ - 5’ phosphate, /iSp18/ - An 18-atom hexa-ethyleneglycol spacer

RN sequence at the 5’ end of the oligonucleotide is designed to increase efficiency of circular ligation (McGlincy and Ingolia 2017).

**3’ DNA adapter**

/5Phos/NNNNNATCGTAGATCGGAAGAGCACACGTCTGAA/3AzideN/

Modifications: /5Phos/ - 5’ phosphate, /3AzideN/ - 3' azide (NHS Ester)

Unique molecular identifier (UMI): NNNNN

Index: ATCGT

The oligonucleotides need to be RNase-Free grade and subjected to HPLC purification.

The second 5 nucleotides of the adapter represent the sample index sequence that can be modified to pool the samples after the adapter-ligated RNA gel and the size selection step.

**DNA oligonucleotides used for cDNA size selection**

86 nt

5’AAAAGCACCGACTCGGTGCCACTTTTTCAAGTTGATAACGGACTAGCCTTATTTTAACTTGCTATGCTTTCGCATAGCTCTAAAAC 3’

101 nt

5’GGCTGGAGACGTGGAGGAGAACCCTGGACCTAGCGACTACAAAGACCATGACGGTGATTATAAAGATCATGACATCGATTACAAGGATGACGATGACAAGG 3’

**Preparation of the 5' pre-adenylated IR-dye conjugated DNA adapter**

- Resuspend the lyophilized oligonucleotide in nuclease-free water to get 100 µM stock.
- Using the 5’ DNA Adenylation Kit (NEB, E2610L), prepare the adenylation reaction:

| Component | Volume, µL | Final |
| --- | --- | --- |
| RNase-free water | 32.5 |  |
| 3’ DNA adapter (100 µM) | 2.5 | 250 pmol |
| ATP (1 mM) | 5 | 5 nmol |
| 10X 5´ DNA Adenylation  Reaction Buffer | 5 | 1x |
| Mth RNA ligase | 5 | 250 pmol |

- The remaining resuspended oligonucleotide can be stored at -20°C.
- Incubate the reaction at 65°C for 2 h.
- Inactivate the enzyme by incubating for 10 min at +85°C.
- Transfer the reaction to a new 1.5 mL microcentrifuge tube.
- Purify the oligos using Oligo Clean & Concentrator columns, elute in 18 µL of PBS.
- Dissolve IRdye-800CW-DBCO (LiCor, cat# 929-50000) in water to get 10 mM solution. Store the unused dye at -20°C in the dark.
- Add 2 µL of 10 mM IRdye-800CW-DBCO to the 18 µL oligonucleotide solution and incubate at 37°C for 2 h to conjugate the dye via “click” chemistry. Protect the reaction from light.
- Purify the labeled oligo from the unreacted dye using Oligo Clean & Concentrator columns, elute in 21 µL of nuclease-free water.
- Measure the concentration of the adapter at the nanodrop (A260) and dilute with nuclease-free water to 10 µM (nmoles/OD = 2.9).
- Aliquot 5' pre-adenylated IR-dye conjugated DNA adapter oligonucleotide and store at -20°C in the dark.

**Infrared PAR-CLIP protocol**

**4-Thiouridine treatment, UV-crosslinking and cell collection.**

In this work, we optimized the growth and collection conditions for immunoprecipitation of IGF2BP3 protein from the adherent human colorectal carcinoma cell line HCT116. The protocol and input amounts might need to be adjusted for other cell types and proteins with different expression levels.

As the IR-PAR-CLIP protocol involves the isolation of the RNA fragments, care has to be taken to avoid the contamination of the sample with RNases (including the use of the RNase-free reagents, solutions, and barrier pipette tips, wearing gloves, and decontamination of the working area).

- Plate five 15 cm (diameter) dishes of cells per condition with 3.5 million HCT116 cells per dish so that at the end of the second day they reach 60% confluency. Grow HCT116 in the incubator under standard growth conditions (37°C, 5% CO2). The growth media for HCT116 cells is McCoy's 5A (Modified) Medium with 10% Fetal Bovine Serum, 2 mM Glutamine, 1% Pen/Step.
- When the cells reach around 60% confluence at the end of the second day, replace the growth media with fresh media containing 100µM 4-thiouridine (4sU). Treat cells with 100 µM 4sU for 15 h. Do not exceed 15 hours of treatment as we observed reduced viability for HCT116 after 18 hours of treatment with of 100µM of 4sU. If additional drug treatments are required, one needs to perform them within these 15 hours.

To avoid background crosslinking from this point on work in the reduced light or under the red light until the crosslinking.

- To collect the cells put the dishes on ice, wash once with 10 mL ice-cold PBS and remove the PBS.
- For crosslinking, put two plates on ice and carefully pipette 1 mL of ice-cold PBS on the dish to prevent cells from drying during crosslinking.
- Crosslink the cells using UV light at 365nm with 0.15 J/cm2.
- Collect cells from five dishes using a cell scarper into one pre-chilled 15 mL falcon.
- Pellet the cells via centrifugation for 5 min at 500g at +4°C, discard PBS, freeze in liquid N2. The pellets can be stored at -80°C.

**Cell lysis**

- Put the falcon with the cell pellet on ice. For the pellet collected from five 15 cm dishes (cell pellets from around 125 million HCT116 cells) add 1250μL of ice-cold lysis buffer.
- Thaw and resuspend the pellet by quick vortexing and incubation on ice.
- Transfer the resuspended cells to the 2 mL RNase-free tube.
- Pass through the 27G needle 3 times to disrupt the cell membrane.
- Incubate on ice for 15 min while vortexing for 3 seconds with 2 min intervals to further disrupt the membranes.
- Clarify the lysate by centrifugation for 20 min at 20,000g
- Take 1100ul of supernatant for RNase digestion.

Note: To be able to determine which fraction of the transcript is bound to the RBP, we recommend to correlate the PAR-CLIP data with the expression level of the transcript by performing transcriptomics analyses in parallel. To collect the RNA for the transcriptomics the 100 µL aliquot of the supernatant can be taken at this step, mixed with 500 µL Trizol reagent and 400 µL RNase-free water, and stored at -80°C till further processing.

**In-lysate RNase Digest**

The optimal RNase treatment conditions depend on the nature of RNA recognition by the RNA-binding protein of interest as well as its abundance. We optimize the RNase treatment in order to obtain the highest number of unique mapped reads. The type of RNase selected for treatment has to be taken into account due to the sequence bias inherent to different types of RNases. For starting concentrations, we recommend 0.1 U/ µL for RNase I and 1 U/ µL for RNase T1. For both RNase treatment steps care has to be taken to avoid overdigestion. The read length of around 30-40 nt allows proper mapping to the genome and binding site prediction. The length of the RNA fragment can be estimated during the size selection of RNA-3’ adapter products on a denaturing gel (Fig. S1C).

- Add RNase to the desired concentration. If needed, dilute RNase in the lysis buffer.
- Incubate reaction on the rotator for 15 min at room temperature.
- Cool reaction for 5 min on ice before proceeding with immunoprecipitation.
- Take a 15 µL “Input” aliquot for western blot to control for the efficiency of the IP.

**Immunoprecipitation (IP), adapter ligation, and recovery of the crosslinked RNA fragments.**

To avoid the possible artifacts originating from the addition of protein tags and overexpression and to be able to use the method to study IGF2BP3 function in various cell types, in this protocol we perform IP of the endogenous intact protein. We recommend testing and optimizing the IP conditions in a separate experiment before starting with the PAR-CLIP protocol using the 4sU-treated, UV-crosslinked, and RNase-treated lysate for input. The IP efficiency can be monitored using Western blot analysis, while the purity of the eluate shall be checked on a colloidal Coomassie gel depending on the expression level of the protein of interest. The IgG control, IP using the antibody against the protein of interest from cells where the gene is knocked out or the mass spectrometry analysis of the size-corresponding band can be the adequate controls to address the specificity of the antibody.

**Conjugation of antibody to protein G Dynabeads**

Start with the preparation of the Dynabeads when the lysate is being centrifugated.

- For five 15 cm dishes with 60-80% confluency (~125 million) of HCT116 cells, use 50 μg of Proteintech antibody and 200 μL of protein G Dynabeads.
- Remove the ethanol and equilibrate Dynabeads with the lysis buffer by washing the Dynabeads 3 times with 1 mL of lysis buffer.
- Resuspend the protein G Dynabeads in 1 mL of the lysis buffer and add 50 µg of anti-IGF2BP3 antibody.
- To couple the antibody to the Dynabeads, incubate the Dynabeads with the antibody for 20 min at room temperature on a rotator.
- To remove the unbound antibody, wash antibody-coupled Dynabeads 3 times with 1 mL of the lysis buffer.
- Resuspend in 200 μL of the lysis buffer.

Note: For controlling for the unspecific RNA / Protein binding to protein G Dynabeads or the antibody, IP with isotype matching IgG can be performed. Alternatively, IPs using anti-RBP antibody in cell lines where the RBP of interest is knockout can help to determine and eliminate unspecific interactions in the analyses.

**Immunoprecipitation**

- Add 200 μL of antibody-coupled Dynabeads to 1 mL of the lysate.
- Incubate on a rotator at +4°C for 4 h. The incubation time can be optimized depending on the protein.
- Using a magnetic rack, collect the flow through lysate and take a 15 µL aliquot for the “Flow-Through” for Western blot analysis to monitor the efficiency of the IP. Discard the lysate.
- Wash the beads twice in 1 mL of the lysis buffer.
- Resuspend the beads in 1 mL of the lysis buffer.

**On-bead RNase treatment**

Similarly to the in-lysate RNase treatment, the optimal digestion conditions depend on cell type, the abundance of the protein of interest, its nature of interaction with RNA as well as on the RNase concentration used for the in-lysate treatment. Here, we tested 0.05 and 0.025 U/µL for RNase I and 1 and 0.25 U/µL for RNase T1. For starting concentrations, we recommend 0.05 U/µL for RNase I and 1 U/µL for RNase T1.

- Add RNase to the desired concentration. If needed, dilute RNase in the lysis buffer.
- Incubate reaction on the rotator for 15 min at room temperature.
- Cool reaction for 5 min on ice.
- Wash the beads 3 times with 1 mL of high salt wash buffer, incubate 3 min after each wash step.

**On-bead dephosphorylation**

RNase I and RNase T1 used in this work leave a 2′,3′-cyclic phosphate at the crosslinked RNA footprints. Therefore, the footprints have to be dephosphorylated to allow 3’ adapter ligation.

- Wash beads twice in 1 mL of PNK wash buffer.
- Resuspend beads in 200 μL of dephosphorylation mix .

| Component | Volume, µL | Final |
| --- | --- | --- |
| RNase-free water | 150 |  |
| 5x PNK buffer pH 6.5 | 40 | 1x |
| T4 polynucleotide kinase (10 U/µL) | 10 | 100 U |
| SUPERase·In (20 U/µL) | 1 | 20 U |

- Incubate the reaction at 37°C for 30 min shaking at 1100rpm.
- Wash beads once in 1 mL of PNK wash buffer.
- Wash beads once in 1 mL of high salt wash buffer. Incubate this wash for 5 min at +4°C.
- Wash beads once in 1 mL of PNK wash buffer.

**On-bead 3’Adapter ligation**

- To avoid background crosslinking from this point on protect the samples from light until the RNA size selection. Prepare ligation reaction mix. Add components in the indicated order.

| Component | Volume, µL | Final |
| --- | --- | --- |
| RNase-free water | 89 |  |
| 50% PEG8000 | 80 | 20% |
| 10x T4 RNA Ligase Reaction Buffer | 20 | 1x |
| 5' pre-adenylated IR-dye conjugated DNA adapter (10 µM) | 5 | 50 pmol |
| T4 RNA Ligase 2 truncated KQ (200 U/μL) | 5 | 1000 U |
| SUPERase·In (20 U/µL) | 1 | 20 U |

- Add 200 μL of the ligation reaction mix to the beads. Mix carefully by pipetting to avoid bubbles. From this point protect the samples from excessive light.
- Incubate at 25°C for 3 h shaking at 1100rpm.

**Elution of the RNA-protein complexes**

- Wash beads once in 1 mL of PNK wash buffer
- Wash beads twice in 1 mL of high salt wash buffer. Incubate first wash for 5 min at +4°C.
- Wash beads once in 1 mL of PNK wash buffer. Transfer beads to the new 1.5 mL tube, then discard the supernatant.
- The crosslinked protein-RNA complexes are eluted in 40 μL of 1x SDS sample buffer without DTT. Incubate at +70°C for 10 min for elution.
- Add DTT to the final concentration of 20 mM.
- Heat the sample at +70°C for 10 min.
- Samples can be stored at -80°C.

**SDS-PAGE of Protein-RNA Complexes**

- Load 40 µL of the eluate into one well of the 10 well 4-12% NuPAGE Novex Bis-Tris gel.
- Use 1x MOPS-SDS running buffer and run the gel at 200 V for 65 min. Use protein ladder visible in the infrared light (e.g. iBright, Thermo Fisher Scientific).
- Visualize the gel in the infrared imager (e.g. LI-COR Odyssey CLx) at 800 nm.
- Cut the band corresponding to the protein-RNA complexes (Fig. S1B). Usually protein-RNA complexes will appear ~30-60 kDa higher than the protein itself. Additionally, the IgG control sample provides information on the background. Transfer the gel piece to the 1.5 mL low-bind RNase-free tube.

**Proteinase K digestion**

Two different approaches for the isolation of protein-RNA-3’adapter complexes from the gel and proteinase K digestion are currently described in the literature: i. electroelution from the gel with subsequent proteinase K treatment (Hafner et al. 2010a; Acosta-Alvear et al. 2018) or ii. step-wise treatment of the crushed gel slurry with proteinase K (Anastasakis et al. 2021). According to our observations, proteinase K digested the protein more efficiently in the electroeluted samples, however systematic characterization is required to compare these approaches.

**i. Electroelution from the gel with subsequent proteinase K treatment** (Hafner et al. 2010a; Acosta-Alvear et al. 2018)

- Fill the Pur-A-Lyzer Midi Dialysis Tube (MWCO 3.5 kDa, Sigma) tube with 800 μL of nuclease-free water and incubate for at least 5 minutes. Empty the tube and check that there is no water leaking.
- Transfer the pieces into a D-Tube Dialyzer Midi Tube and add 400 μL of 1x MOPS-SDS running buffer. Put the tubes into a supporting tray.
- Put the supporting tray into the gel running chamber. The two membranes of the tube must be in perpendicular to the electric field to permit the electric current to pass through the tube.
- Electroelute the crosslinked protein-RNA-3’adapter complexes in 1x MOPS-SDS running buffer at 100 V for 2 h.
- Reverse the polarity of the electric current for 2 min to release the protein from the membrane.
- Pipette the solution carefully at least 5 times and transfer to 2 mL low-bind RNase-free tube.
- Add an equal volume of 2x Proteinase K buffer and proteinase K at the final concentration of 1.2 mg/ml and incubate for 30 min at +55°C.

**ii. Step-wise treatment of the crushed gel slurry with proteinase K** (Anastasakis et al. 2021)

- Freeze the gel piece at -80°C for 3 min, thaw at +55°C and crash the gel with a single-use RNase-free pellet pestle.
- Add 100 μL of 2x proteinase K buffer with 50 mM DTT and boil at +95°C for 2 min.
- Add proteinase K to 2.4 mg/ml (48 μL of 20 mg/ml proteinase K) in 400 μL 2 x proteinase K buffer. Incubate at +50°C for 30 min shaking at 1100rpm.
- Add proteinase K to 1.5 mg/ml (18.75 μL of 20 mg/ml proteinase K) in 250 μL 2 x proteinase K buffer. Incubate at +50°C for 30 min shaking at 1100rpm.
- Add proteinase K to 2.4 mg/ml (18.75 μL of 20 mg/ml proteinase K) in 250 μL 2 x proteinase K buffer. Incubate at +50°C for 30 min shaking at 1100rpm.
- Load 500 μL of the sample with the gel pieces onto the Spin-X centrifuge filter.
- Separate the sample from gel pieces by centrifugation for 10 min at 10,000 g at a tabletop centrifuge at room temperature.
- Collect the flow-through in a 2 mL low-bind RNase-free tube and repeat with the rest of the samples.

**Adapter-ligated RNA extraction**

- Extract the RNA by adding 1 mL of acidic phenol – chloroform – IAA (25:24:1, pH 4.0).
- Vortex for 15 sec and separate the phases by centrifugation for 15 min at 12,000 g.
- Carefully transfer the aqueous phase to the new 2 mL low-bind RNase-free tube containing 1 mL of chloroform.
- Vortex for 15 sec and separate the phases by centrifugation for 15 min at 12,000 g.
- Carefully transfer the aqueous phase to the new 2 mL low-bind RNase-free tube.
- Mix RNA with 3 μL of glycogen and precipitate by adding 1 mL of isopropanol. Mix immediately by vortexing.
- Precipitate at -20°C for at least 1 hour. Samples can be stored at -20°C for several days.
- Pellet RNA by centrifugation for 20 min at +4°C at 20,000 g and carefully discard the supernatant.
- Spin the tubes shortly on a tabletop centrifuge to collect the residual ethanol. Discard the supernatant using a small tip.
- Dry the pellet for 5 min at room temperature. Protect from RNases and dust.

**Adapter-ligated RNA gel and size selection**

- Resuspend the RNA pellet in 10 μL of 1x TBE-Urea dye
- Denature by heating at +75°C for 2 min. Immediately put on ice.
- Load the sample into one well of the 10-well 15% TBE-Urea gel (company, product information) and run the gel in 1x TBE running buffer at 180 V for 70 min.
- Load 10 fmol of the adapter as a ladder to the separate well. The amount might need to be adjusted depending on the abundance of the protein-crosslinked RNA fragments. Regular low-range ssRNA ladder (e.g. N0364S, NEB) can be used additionally to confirm the size range cut from the gel.
- Visualize the gel in the infrared imager at 800nm.
- The adapter-conjugated RNA fragments migrate as a distinct wide band above the unligated adapter (Fig. S1C). Cut the gel fragment corresponding to the adapter-conjugated RNA fragments.
- The gel can be strained in SYBR gold for 3 min, washed with water, and visualized to address the size of adapter-conjugated RNA fragments. For the RNA size ranging from 20-40 nt we expect the band between 54 and 74 nt.
- Freeze the gel pieces at -80°C for 3 min, thaw at +55°C and crash the gel with a single-use RNase-free pellet pestle.
- Add 300 μL of RNA elution buffer and 1 μL of SUPERase·In RNase Inhibitor. Elute the RNA on a rotator overnight at +4°C or 3 hours at +30°C.
- Load the gel slurry onto the Spin-X centrifuge filter.
- Separate the sample from gel pieces by centrifugation for 10 min at 10,000 g at room temperature.
- Collect the flow-through in a 1.5 mL low-bind RNase-free tube.
- To each sample add 750 μL of 100% Ethanol and 1.5 μL of GlycoBlue. Mix immediately by vortexing.
- Precipitate RNA at -20°C for at least 1 hour.
- Pellet RNA by centrifugation for 20 min at +4°C at 20,000 g and carefully discard the supernatant.
- Wash the pellet by adding 1 mL of 70% Ethanol. Centrifuge for 10 min at +4°C at 20,000 g and carefully discard the supernatant.
- Spin the tubes shortly on a tabletop centrifuge to collect the residual ethanol. Discard the supernatant using a small tip.
- Dry the pellet for 5 min at room temperature. Resuspend in 11.5 μL of Nuclease-free water and transfer the sample to PCR tubes.

**Reverse transcription**

For the reverse transcription, we selected Superscript IV reverse transcriptase for its high processivity. It has to be taken into account that Superscript IV has terminal nucleotidyl transferase (TdT) activity, therefore 1 to 3 nucleotides have to be additionally trimmed from the 5’ end of the reads before alignment.

- Add 1 μL of 1 μM reverse transcription primer to each sample.
- Incubate at +70°C for 10 min, place on ice.
- Add the following components in the indicated order. Total volume 20 µL.

| Component | Volume, µL | Final |
| --- | --- | --- |
| 5x Superscript IV buffer | 4 | 1x |
| dNTP mix (10 mM each) | 1 | 0.5 mM each |
| DTT (100 mM) | 1 | 5 mM |
| SUPERase·In (20 U/μL) | 0.5 | 10 U |
| Superscript IV (200 U/μL) | 1 | 200 U |

- Incubate at +55°C for 20 min, place on ice.
- Add 2.2 µL of 1 M NaOH and incubate at 98°C for 30 minutes to hydrolyze the RNA.
- Cool to room temperature and neutralize with 2.2 µL of 1 M HCl.
- Purify the reverse transcription reactions on Oligo Clean & Concentrator columns according to the manufacturer’s instructions. Elute in 6 µL of nuclease-free water.

**Purification of the reverse transcription product on a denaturing gel**

- Add 6 µL of 2x TBE-Urea sample buffer to each sample.
- Denature by heating at +75°C for 2 min. Immediately put on ice.
- Load the sample into one well of the 10-well 10% TBE-Urea gel. To the separate wells load 1 μL of 1 μM reverse transcription primer as a marker and a low-range ssRNA or ssDNA ladder. For additional reference, we used custom 86 and 101 nt DNA oligos ordered from Microsynth (sequence available in the Oligonucleotides section).
- Run the gel in 1x TBE running buffer at 180 V for 70 min.
- Stain the gel in SYBR gold for 10 min, wash the gel with nuclease-free water.
- Separate the reverse transcription product from the unreacted primer and no-insert products. The amount of the reverse transcription product can be below the detection limit for the SYBR gold staining. If this is the case the size selection can be done based on the ssRNA or ssDNA ladder. For the insert size ranging from 20-40 nt we expect the product to migrate between 96 and 116 nt. As the RNA is size selected on the RNA gel wider gel fragment (80-150 nt) shall be excised to avoid potential losses of the product. We used 80-150 nt range for all described RNase treatment conditions and did not observe a high amount of the insert fragments longer than 45 nt (Fig. S1D).
- Freeze the gel pieces at -80°C for 3 min, thaw at +55°C and crash the gel with a single-use RNase-free pellet pestle.
- Add 300 μL of DNA elution buffer. Elute on a rotator overnight at +4°C or 3 hours at +30°C.
- Load the gel slurry onto the Spin-X centrifuge filter.
- Separate the sample from gel pieces by centrifugation for 10 min at 10,000 g at room temperature.
- Collect the flow-through in a 1.5 mL low-bind RNase-free tube.
- To each sample add 750 μL of 100% Ethanol and 1.5 μL of GlycoBlue. Mix immediately by vortexing.
- Precipitate DNA at -20°C for at least 1 hour.
- Pellet DNA by centrifugation for 20 min at +4°C at 20,000 g and carefully discard the supernatant.
- Wash the pellet by adding 1 mL of 70% Ethanol. Centrifuge for 10 min at +4°C at 20,000 g and carefully discard the supernatant.
- Spin the tubes shortly on a tabletop centrifuge to collect the residual ethanol. Discard the supernatant using a small tip.
- Dry the pellet for 5 min at room temperature.

**Circular ligation**

To reduce the possibility of the sequence bias introduced during second adapter ligation and to increase the efficiency of the protocol we used the circular ligation strategy with the reverse transcription primer that has an optimized sequence and contains the carbon linker which facilitates circular ligation and prevents rolling circle amplification (Ingolia 2010; König et al. 2010; McGlincy and Ingolia 2017).

- While the pellet is drying assemble the circular ligation reaction mix according to the table.

| Component | Volume per sample, µL | Final |
| --- | --- | --- |
| Nuclease-free water | 8 |  |
| 10x CircLigase II buffer | 1 | 1x |
| MnCl2 (50 mM) | 0.5 | 2.5 mM |
| CircLigase II (100 U/µL) | 0.5 | 50 U |

- Carefully resuspend the pellet in 10 µL of the circular ligation reaction mix.
- Incubate at +60°C for 2 hours. To inactivate the enzyme, incubate at +80°C for 10 min.
- Circularized cDNA can be stored indefinitely at -20°C.

**Library construction PCR – determination of the required PCR cycle number**

To determine the number of cycles required for the amplification of the library perform a set of small-scale PCR reactions to determine the cycles. Alternatively, the concentration of the circular cDNA and the required number of cycles for the library quantification can be quantified using qPCR.

- Assemble the PCR reaction according to the table and aliquot 10 µL reactions to 6 PCR tubes.

| Component | Volume, µL | Final |
| --- | --- | --- |
| 5x High fidelity buffer | 14 | 1x |
| dNTP mix (10 mM each) | 1.4 | 0.2 mM each |
| NEB Universal primer (10 µM)* | 3.5 | 500 nM |
| NEB Index primer (10 µM)* | 3.5 | 500 nM |
| Circularization reaction | 2.8 |  |
| Phusion polymerase (2 U/ µL) | 0.7 | 2.5 mM |
| Nuclease-free water up to 65 µL | 44.1 |  |

* here we used the NEB single index primer kit (E6609S). Currently, the newer version of this product containing Unique Dual Indexes is available and recommended (E6440S).

- Run the PCR reaction in the thermocycler according to the program

| Step | Temperature | Time | Cycle Number |
| --- | --- | --- | --- |
| Initial denaturation | 98°C | 30 sec |  |
| Denaturation | 98°C | 10 sec | 20 cycles |
| Primer annealing | 65°C | 10 sec |
| Extension | 72°C | 10 sec |

- Remove one tube at cycles 10, 12, 14, 16, 18, 20. For the IgG control, the expected cycle number is 22-23.
- Add 2 µL of 6x DNA gel loading dye per reaction.
- Load the sample into one well of the 10-well 6% TBE gel.
- Run the gel in 1x TBE running buffer at 180 V for 40 min.
- Stain the gel in SYBR gold for 3 min, wash with nuclease-free water.
- Select the cycle number where the bright product band appears

**Library construction PCR – endpoint PCR**

- Assemble the PCR reaction according to the table.

| Component | Volume, µL | Final |
| --- | --- | --- |
| 5x High fidelity buffer | 10 | 1x |
| dNTP mix (10 mM each) | 1 | 0.2 mM each |
| NEB Universal primer (10 µM) | 2.5 | 500 nM |
| NEB Index primer (10 µM) | 2.5 | 500 nM |
| Circularization reaction | 2 |  |
| Phusion polymerase (2 U/ µL) | 0.5 | 2.5 mM |
| Nuclease-free water up to 65 µL | 31.5 |  |

- Run the PCR reaction in the thermocycler according to the program

| Step | Temperature | Time |  |
| --- | --- | --- | --- |
| Initial denaturation | 98°C | 30 sec |  |
| Denaturation | 98°C | 10 sec | x cycles |
| Primer annealing | 65°C | 10 sec |
| Extension | 72°C | 10 sec |
| Final extension | 72°C | 5 min |  |
| Hold | 10°C | ∞ |  |

In this protocol we describe the purification of the PCR product via size selection on TBE gel and gel extraction as it allows the efficient separation of the primers and the no-insert product. If minimal presence of the no-insert product is observed on a cycle number determination gel the PCR product can be purified using the bead-based purification methods after optimization of the conditions (e.g. ProNex beads (Buchbender et al. 2020)).

- To each sample add 5 μL of 3M sodium acetate (pH 5.2), 125 μL of 100% Ethanol, and 1.5 μL of GlycoBlue. Mix immediately by vortexing. Alternatively, use DNA Clean & Concentrator columns according to the manufacturer’s instructions. Elute in 6 µL of elution buffer.
- Precipitate DNA at -20°C for at least 1 hour.
- Pellet DNA by centrifugation for 20 min at +4°C at 20,000 g and carefully discard the supernatant.
- Dry the pellet for 5-10 min at room temperature and resuspend it in 10 µL of 1x DNA gel loading dye.
- Load the sample into one well of the 10-well 6% TBE gel.
- Run the gel in 1x TBE running buffer at 180 V for 40 min.
- Stain the gel in SYBR gold for 3 min, wash with nuclease-free water.
- Separate the library from the no-insert products (Fig. S1E).
- Freeze the gel pieces at -80°C for 3 min, thaw at +55°C and crash the gel with a single-use RNase-free pellet pestle.
- Add 300 μL of DNA elution buffer. Elute on a rotator overnight at +4°C or 3 hours at +30°C.
- Load the gel slurry onto Spin-X centrifuge filter.
- Separate the sample from gel pieces by centrifugation for 10 min at 10,000 g at room temperature.
- Collect the flow-through in a 1.5 mL low-bind RNase-free tube.
- To each sample add 750 μL of 100% Ethanol and 1.5 μL of GlycoBlue. Mix immediately by vortexing.
- Precipitate DNA at -20°C for at least 1 hour.
- Pellet DNA by centrifugation for 20 min at +4°C at 20,000 g and carefully discard the supernatant.
- Wash the pellet by adding 1 mL of 70% Ethanol. Centrifuge for 10 min at +4°C at 20,000 g and carefully discard the supernatant.
- Spin the tubes shortly on a tabletop centrifuge to collect the residual ethanol. Discard the supernatant using a small tip.
- Dry the pellet for 5 min at room temperature.
- Resuspend the DNA in 10 μL of nuclease-free water.

**Library quantification and sequencing**

Check the library concentration and size distribution using a fragment analyzer (e.g. Agilent Bioanalyzer 2100 with High Sensitivity DNA Kit). We typically observe the library length distribution to peak at ~153bp. For precise quantification before multiplexing qPCR with NEBNext Library Quant Kit for Illumina (NEB) can be performed. Libraries can be sequenced on Illumina high-throughput sequencing platform at single-end 50-100 bp run at the depth of ~50-100 million reads per sample.

**Supplementary methods: paralyzer.ini file**

BANDWIDTH=3

CONVERSION=T>C

MINIMUM_READ_COUNT_PER_GROUP=5

MINIMUM_READ_COUNT_PER_CLUSTER=2

MINIMUM_READ_COUNT_FOR_KDE=3

MINIMUM_CLUSTER_SIZE=11

MINIMUM_CONVERSION_LOCATIONS_FOR_CLUSTER=2

MINIMUM_CONVERSION_COUNT_FOR_CLUSTER=2

MINIMUM_READ_COUNT_FOR_CLUSTER_INCLUSION=1

MINIMUM_READ_LENGTH=18

MAXIMUM_NUMBER_OF_NON_CONVERSION_MISMATCHES=1

EXTEND_BY_READ

GENOME_2BIT_FILE=(PATH to hg38 2bit file)

SAM_FILE=(PATH to output SAM file)

OUTPUT_CLUSTERS_FILE=(PATH to output clusters file)

OUTPUT_GROUPS_FILE=(PATH to output groups file)
