# Supplementary material
Source: HighWire-hosted journal article supplement (doi:10.1101/rna.079714.123)
Supplement: Supplemental_Table_1_MS.xlsx [file Supplemental_Table_1_MS.xlsx]

## Sheet: ProteinGroups
																							Sorted																									Filtered
Majority protein IDs	Protein names	Gene names	Fasta headers	Number of proteins	Peptides	Razor + unique peptides	Unique peptides	Sequence coverage [%]	Sequence coverage control [%]	Sequence coverage DMSO_1to5000 [%]	Mol. weight [kDa]	Q-value	Score	Intensity control	Intensity DMSO_1to5000	iBAQ peptides	iBAQ control	iBAQ DMSO_1to5000	LFQ intensity control	LFQ intensity DMSO_1to5000	MS/MS count control	MS/MS count DMSO_1to5000	MS/MS count	Protein IDs	Peptides control	Peptides DMSO_1to5000	Razor + unique peptides control	Razor + unique peptides DMSO_1to5000	Unique peptides control	Unique peptides DMSO_1to5000	Unique + razor sequence coverage [%]	Unique sequence coverage [%]	Sequence length	Sequence lengths	Identification type control	Identification type DMSO_1to5000	id	Peptide IDs	Peptide is razor	Mod. peptide IDs	Evidence IDs	MS/MS IDs	Best MS/MS	Oxidation (M) site IDs	Phospho (STY) site IDs	Oxidation (M) site positions	Phospho (STY) site positions	Potential contaminant	Taxonomy IDs
O00425	Insulin-like growth factor 2 mRNA-binding protein 3	IGF2BP3	sp|O00425|IF2B3_HUMAN Insulin-like growth factor 2 mRNA-binding protein 3 OS=Homo sapiens (Human) OX=9606 GN=IGF2BP3 PE=1 SV=2	1	76	76	69	74.6	74.1	73.2	63.704	0	323.31	78716000000	92483000000	29	2714400000	3189100000	11273000000	7975400000	1066	1033	9754	O00425	74	70	74	70	67	63	74.6	69.9	579	579	By MS/MS	By MS/MS	50	56;57;119;120;173;174;175;359;456;528;529;557;558;561;655;733;734;817;818;893;945;974;975;1017;1142;1143;1156;1168;1169;1174;1236;1237;1246;1280;1284;1285;1325;1326;1328;1354;1387;1406;1407;1412;1413;1561;1696;1697;1716;1861;1862;1863;1915;1933;1934;2003;2086;2089;2090;2106;2139;2140;2143;2155;2213;2214;2435;2436;2447;2448;2671;2686;2795;2828;2900;2961	True;True;True;True;True;True;True;True;True;True;True;True;True;True;True;True;True;True;True;True;True;True;True;True;True;True;True;True;True;True;True;True;True;True;True;True;True;True;True;True;True;True;True;True;True;True;True;True;True;True;True;True;True;True;True;True;True;True;True;True;True;True;True;True;True;True;True;True;True;True;True;True;True;True;True;True	58;59;60;61;126;127;182;183;184;377;484;563;564;595;596;599;695;696;785;786;873;874;953;1005;1036;1037;1038;1039;1083;1084;1085;1215;1216;1229;1242;1243;1248;1315;1316;1317;1328;1370;1374;1375;1418;1419;1421;1448;1482;1503;1504;1509;1510;1668;1811;1812;1835;1985;1986;1987;2056;2080;2081;2082;2083;2164;2258;2261;2262;2279;2313;2314;2317;2329;2389;2390;2624;2625;2626;2627;2638;2639;2640;2641;2881;2…	333;334;335;336;337;338;339;340;341;342;343;344;345;346;347;348;349;350;351;352;353;354;355;356;357;358;359;360;361;362;363;364;365;366;367;368;369;370;371;372;373;374;375;376;377;378;379;380;381;382;383;384;385;386;387;388;389;390;391;392;393;394;395;396;865;866;867;868;869;870;871;872;873;874;875;876;877;878;879;880;881;882;883;884;885;886;887;888;889;890;891;892;893;894;895;896;897;898;899;900…
Q9Y6M1	Insulin-like growth factor 2 mRNA-binding protein 2	IGF2BP2	sp|Q9Y6M1|IF2B2_HUMAN Insulin-like growth factor 2 mRNA-binding protein 2 OS=Homo sapiens (Human) OX=9606 GN=IGF2BP2 PE=1 SV=2	1	47	44	44	62.9	62.6	54.1	66.121	0	323.31	30724000000	26717000000	28	1097300000	954180000	4986600000	3667100000	392	327	2218	Q9Y6M1	46	40	43	37	43	37	59.1	59.1	599	599	By MS/MS	By MS/MS	405	122;123;457;515;555;556;561;604;605;661;666;735;856;894;1028;1144;1165;1217;1218;1245;1262;1265;1266;1291;1321;1329;1389;1405;1429;1495;1496;1642;1643;1727;1791;1864;1902;1933;1934;2102;2145;2181;2421;2796;2963;3133;3134	True;True;True;True;True;True;False;True;True;True;True;True;True;True;True;True;True;True;True;True;True;True;True;True;True;True;True;True;True;True;True;True;True;True;True;True;True;False;False;True;True;True;True;True;True;True;True	129;130;485;549;593;594;599;644;645;703;708;787;914;915;954;1096;1217;1239;1294;1295;1327;1346;1350;1351;1352;1353;1381;1411;1412;1413;1422;1484;1502;1527;1597;1598;1753;1754;1846;1912;1988;1989;2035;2036;2037;2080;2081;2082;2083;2274;2319;2355;2610;3020;3202;3382;3383	915;916;917;918;919;920;921;922;923;924;925;926;927;928;929;930;931;932;933;934;935;936;937;3618;3619;3620;3621;3622;3623;3624;3625;3626;3627;3628;3629;3630;3631;3632;3633;3634;3635;3636;3637;3638;3639;3640;3641;3642;3643;3644;3645;3646;3647;3648;3649;3650;3651;3652;3653;3654;3655;3656;3657;3658;3659;3660;4121;4122;4123;4124;4125;4126;4127;4128;4129;4130;4131;4132;4133;4134;4135;4136;4137;4138;44…	934;935;936;937;938;939;940;941;942;943;944;945;946;947;948;949;950;951;952;3297;3298;3299;3300;3301;3302;3303;3304;3305;3306;3307;3308;3309;3310;3311;3312;3313;3314;3315;3316;3317;3318;3319;3320;3321;3322;3323;3324;3325;3326;3327;3328;3329;3330;3331;3332;3333;3334;3335;3336;3337;3338;3339;3340;3341;3342;3343;3344;3345;3346;3347;3348;3349;3350;3351;3352;3353;3354;3355;3356;3357;3358;3359;3360;336…	935;947;3367;3877;4195;4210;4345;4834;4864;5084;5155;5585;6714;7192;7814;8624;8775;10175;10367;11251;12280;12297;12426;13354;13622;14524;14904;15089;16265;16786;16795;17599;17668;18476;18793;19417;19849;20347;21062;22234;22459;22800;24063;27292;28877;30067;30098	48;352;353;354	69;70;71;72;73;74;75	69;257;262;475	11;161;162;164;175;176;595		-1
P38606	V-type proton ATPase catalytic subunit A	ATP6V1A	sp|P38606|VATA_HUMAN V-type proton ATPase catalytic subunit A OS=Homo sapiens (Human) OX=9606 GN=ATP6V1A PE=1 SV=2	1	46	46	46	79.3	73.1	69.7	68.303	0	323.31	3811300000	3768500000	34	112100000	110840000	528380000	402160000	172	159	947	P38606	44	43	44	43	44	43	79.3	79.3	617	617	By MS/MS	By MS/MS	154	133;141;142;256;257;293;332;369;386;387;409;438;446;531;584;776;821;967;968;1035;1074;1075;1243;1249;1337;1401;1498;1525;1567;1629;1723;2094;2223;2224;2239;2308;2375;2614;2662;2790;2792;2856;2872;2879;2918;3145	True;True;True;True;True;True;True;True;True;True;True;True;True;True;True;True;True;True;True;True;True;True;True;True;True;True;True;True;True;True;True;True;True;True;True;True;True;True;True;True;True;True;True;True;True;True	140;148;149;270;271;310;350;387;405;406;407;408;434;464;465;466;474;566;622;623;830;877;878;1028;1029;1030;1103;1143;1144;1324;1325;1331;1332;1430;1498;1600;1601;1630;1674;1738;1842;2266;2400;2401;2416;2492;2493;2563;2820;2821;2871;3011;3012;3013;3015;3084;3100;3108;3150;3394	996;997;998;999;1000;1001;1002;1003;1062;1063;1064;1065;1066;1067;1068;1069;1070;1071;1072;1073;1074;1075;1076;1077;1078;1079;1080;1081;1082;1083;1084;1085;2033;2034;2035;2036;2037;2038;2039;2040;2041;2042;2043;2044;2335;2336;2337;2338;2339;2340;2341;2342;2343;2580;2581;2582;2583;2584;2585;2586;2587;2840;2841;2842;2843;2844;2845;2925;2926;2927;2928;2929;2930;2931;2932;2933;2934;2935;2936;2937;293…	995;996;997;998;999;1000;1001;1052;1053;1054;1055;1056;1057;1058;1059;1060;1061;1062;1063;1064;1065;1066;1067;1068;1069;1070;1071;1072;1073;1074;1075;1076;1077;1078;1980;1981;1982;1983;1984;1985;1986;1987;2191;2192;2193;2194;2195;2196;2197;2198;2199;2200;2201;2202;2203;2204;2346;2347;2348;2349;2350;2351;2352;2353;2354;2562;2563;2564;2565;2566;2567;2605;2606;2607;2608;2609;2610;2611;2612;2613;2614…	1001;1052;1058;1982;1986;2191;2348;2563;2644;2662;2792;2897;2985;3985;4721;5792;6496;7489;7512;7862;8042;8052;11244;12233;14602;15072;16846;16982;17224;17506;18422;22174;23021;23050;23142;23448;23798;25800;26030;26940;26970;28086;28148;28209;28434;30140	151;152;153;154;155;156;157;158;159;160;161;162;163;164;165;166;167;168		34;39;61;95;205;284;296;306;318;340;346;347;368;540;544;550;574;608			-1
P01870	Ig gamma chain C region		sp|P01870|IGHG_RABIT Ig gamma chain C region OS=Oryctolagus cuniculus PE=1 SV=1	6	18	18	18	70.3	70.3	70.3	35.404	0	323.31	5492000000	5342000000	15	366140000	356130000	1381900000	1182400000	83	93	931	CON__sp|P01870|IGHG_RABIT;P01857;P01860;CON__sp|P01862|IGHG2_CAVPO;P01859;P01861	18	18	18	18	18	18	70.3	70.3	323	323;330;377;329;326;327	By MS/MS	By MS/MS	16	168;169;219;477;672;861;1049;1809;2100;2201;2619;2741;2784;2785;2837;2892;3041;3042	True;True;True;True;True;True;True;True;True;True;True;True;True;True;True;True;True;True	177;178;233;506;507;715;920;921;1118;1931;2272;2376;2826;2956;3004;3005;3064;3121;3284;3285;3286;3287	1242;1243;1244;1245;1246;1247;1248;1249;1250;1251;1252;1253;1254;1255;1256;1257;1258;1259;1260;1261;1262;1263;1264;1265;1266;1746;1747;1748;1749;1750;1751;1752;1753;1754;1755;1756;1757;1758;1759;1760;1761;1762;1763;1764;1765;1766;1767;1768;3801;3802;3803;3804;3805;3806;3807;3808;3809;3810;3811;3812;3813;3814;3815;3816;3817;3818;3819;3820;3821;3822;3823;3824;3825;3826;3827;3828;3829;3830;3831;3832…	1185;1186;1187;1188;1189;1190;1191;1192;1193;1194;1195;1196;1197;1198;1199;1200;1201;1202;1203;1204;1205;1206;1704;1705;1706;1707;1708;1709;1710;1711;1712;1713;1714;1715;1716;1717;1718;1719;1720;1721;1722;1723;1724;1725;1726;1727;1728;1729;1730;1731;1732;1733;1734;1735;1736;1737;1738;1739;1740;1741;1742;1743;1744;1745;1746;1747;1748;3500;3501;3502;3503;3504;3505;3506;3507;3508;3509;3510;3511;3512…	1204;1205;1741;3594;5237;7004;7935;19088;22224;22892;25869;26582;26853;26908;27975;28279;29429;29552	6;7;8		128;227;304		+	-1;-1;-1;-1;-1;-1
P0DMV8;P0DMV9	Heat shock 70 kDa protein 1A;Heat shock 70 kDa protein 1B	HSPA1A;HSPA1B	sp|P0DMV8|HS71A_HUMAN Heat shock 70 kDa protein 1A OS=Homo sapiens (Human) OX=9606 GN=HSPA1A PE=1 SV=1;sp|P0DMV9|HS71B_HUMAN Heat shock 70 kDa protein 1B OS=Homo sapiens (Human) OX=9606 GN=HSPA1B PE=1 SV=1	2	43	43	23	66.8	61.3	54.9	70.051	0	323.31	2367300000	3488700000	32	73980000	109020000	433340000	449170000	98	113	843	P0DMV8;P0DMV9	40	38	40	38	22	20	66.8	37	641	641;641	By MS/MS	By MS/MS	108	4;55;94;233;246;273;340;357;441;620;750;755;760;903;1131;1225;1330;1331;1386;1395;1551;1627;1682;1794;1844;1845;1906;1937;1938;1940;1944;2040;2041;2212;2263;2347;2348;2438;2575;2780;2976;3105;3106	True;True;True;True;True;True;True;True;True;True;True;True;True;True;True;True;True;True;True;True;True;True;True;True;True;True;True;True;True;True;True;True;True;True;True;True;True;True;True;True;True;True;True	4;57;100;101;247;260;287;358;375;469;660;803;808;813;814;963;1203;1302;1423;1424;1481;1491;1492;1656;1736;1794;1915;1967;1968;2042;2088;2089;2090;2091;2093;2094;2099;2100;2207;2208;2388;2442;2534;2535;2629;2780;3000;3216;3352;3353	25;26;27;28;29;30;31;32;33;331;332;682;683;684;685;686;687;688;689;690;691;692;693;694;695;696;697;698;699;700;701;702;703;704;705;706;707;708;709;710;711;712;713;714;715;716;717;718;719;720;721;722;723;724;725;726;727;728;729;730;731;732;733;734;1845;1846;1847;1848;1849;1850;1851;1852;1853;1854;1855;1856;1857;1858;1859;1860;1861;1938;1939;1940;1941;1942;1943;1944;1945;1946;1947;1948;1949;1950;19…	16;17;18;19;20;21;201;202;758;759;760;761;762;763;764;765;766;767;768;769;770;771;772;773;774;775;776;777;778;779;780;781;782;783;784;785;786;787;788;789;790;791;792;793;794;795;796;797;798;799;1799;1800;1801;1802;1803;1804;1805;1806;1807;1808;1809;1810;1811;1812;1813;1814;1815;1816;1817;1818;1819;1820;1821;1822;1823;1824;1825;1826;1827;1828;1892;1893;1894;1895;1896;1897;1898;1899;1900;1901;1902;…	17;202;758;1820;1895;2058;2377;2519;2956;4923;5660;5677;5711;7243;8288;10412;14553;14572;14863;15014;17123;17494;17902;18930;19218;19261;19982;21096;21108;21118;21188;21762;21786;22956;23270;23704;23715;24501;25535;26769;28957;29922;29927	83;84;85;86;87;88		87;122;127;381;518;549			-1;-1
P04264	Keratin, type II cytoskeletal 1	KRT1	sp|P04264|K2C1_HUMAN Keratin, type II cytoskeletal 1 OS=Homo sapiens GN=KRT1 PE=1 SV=6	2	53	50	37	66.8	58.4	52.3	66.038	0	323.31	558040000	437540000	31	18001000	14114000	79892000	49113000	40	37	621	P04264;CON__sp|P04264|K2C1_HUMAN	38	39	35	36	23	25	64.9	54.8	644	644;644	By MS/MS	By MS/MS	23	54;243;487;503;784;812;866;888;899;1008;1021;1167;1376;1452;1453;1503;1559;1685;1711;1712;1781;1782;1921;1987;1988;1992;1993;2017;2046;2152;2153;2154;2313;2317;2368;2378;2402;2443;2451;2452;2466;2479;2480;2494;2673;2674;2703;2725;2726;2841;3052;3076;3077	True;True;True;True;False;True;True;True;True;True;True;False;True;True;True;True;True;True;True;True;True;True;True;True;True;True;True;True;True;True;True;True;True;True;True;True;True;True;True;True;True;True;True;True;True;True;True;True;True;True;True;False;True	56;257;517;518;535;536;838;868;926;948;959;1073;1089;1241;1470;1471;1553;1554;1606;1664;1665;1666;1797;1798;1830;1831;1902;1903;2063;2064;2146;2147;2151;2152;2182;2183;2184;2215;2326;2327;2328;2498;2502;2556;2566;2591;2634;2644;2645;2661;2675;2676;2690;2883;2884;2917;2940;2941;3068;3297;3322;3323	322;323;324;325;326;327;328;329;330;1914;1915;1916;1917;1918;1919;1920;1921;1922;3885;3886;3887;3888;3889;3890;3891;3892;3893;3894;3895;3896;3897;3898;3899;3900;3901;3902;4025;4026;4027;4028;4029;4030;4031;4032;4033;4034;4035;4036;4037;4038;4039;4040;4041;4042;6173;6174;6175;6176;6177;6178;6179;6180;6181;6182;6183;6184;6185;6186;6187;6188;6189;6354;6355;6356;6357;6358;6359;6360;6361;6362;6900;690…	196;197;198;199;200;1858;1859;1860;1861;1862;1863;1864;1865;1866;1867;1868;1869;1870;1871;1872;1873;3640;3641;3642;3643;3644;3645;3646;3647;3648;3649;3650;3651;3652;3653;3654;3655;3656;3657;3658;3659;3660;3773;3774;3775;3776;3777;3778;3779;3780;3781;3782;3783;3784;3785;3786;3787;3788;3789;3790;3791;3792;3793;5845;5846;5847;5848;5849;5850;5851;5852;5853;5854;5855;5856;5857;5858;5859;5860;5861;5862…	200;1867;3649;3786;5871;6005;7053;7177;7209;7704;7787;8778;14798;16530;16531;16870;17185;17944;18320;18324;18676;18690;20123;21437;21447;21459;21489;21623;21835;22525;22530;22532;23492;23509;23783;23843;23954;24514;24884;24898;24998;25086;25105;25147;26223;26237;26428;26501;26518;28018;29614;29693;29701	12;13;14;15;16		259;262;296;469;493		+	-1;-1
Q15776	Zinc finger protein with KRAB and SCAN domains 8	ZKSCAN8	sp|Q15776|ZKSC8_HUMAN Zinc finger protein with KRAB and SCAN domains 8 OS=Homo sapiens (Human) OX=9606 GN=ZKSCAN8 PE=1 SV=2	19	35	35	33	71.8	70.9	66.1	65.815	0	323.31	1913700000	1722500000	32	59802000	53829000	194290000	134890000	92	80	527	Q15776;Q8NB50;Q3ZCX4;Q9H5V7;P19878;Q86Y25;Q8NC26;Q6NSZ9;Q6AZW8;Q5MCW4;Q8TBZ5;Q9H165;Q8NEP9;Q9UL36;Q6ZNA1;Q9UEG4;Q9P0L1;P35789;P0CG00	34	30	34	30	32	29	71.8	67.6	578	578;900;644;419;526;554;417;544;331;686;544;835;628;1845;936;869;754;620;497	By MS/MS	By MS/MS	236	87;89;91;92;140;196;442;522;562;586;938;939;1015;1161;1162;1196;1198;1199;1205;1206;1443;2013;2146;2219;2306;2339;2386;2411;2430;2522;2550;2847;2936;2937;3138	True;True;True;True;True;True;True;True;True;True;True;True;True;True;True;True;True;True;True;True;True;True;True;True;True;True;True;True;True;True;True;True;True;True;True	93;95;97;98;147;206;207;208;470;556;600;625;998;999;1080;1081;1234;1235;1236;1271;1273;1274;1280;1281;1543;1544;2175;2176;2320;2396;2490;2526;2574;2600;2619;2723;2754;3075;3168;3169;3387	609;610;611;612;613;614;615;616;617;618;619;620;630;631;632;633;634;635;636;637;638;639;640;641;645;646;647;648;649;650;651;652;653;654;655;656;657;658;659;660;661;662;663;664;665;666;667;668;669;670;671;672;673;674;1043;1044;1045;1046;1047;1048;1049;1050;1051;1052;1053;1054;1055;1056;1057;1058;1059;1060;1061;1558;1559;1560;1561;1562;1563;1564;1565;1566;1567;1568;1569;1570;1571;1572;1573;1574;157…	639;640;641;642;643;644;645;646;647;648;649;650;669;670;671;672;673;674;675;676;677;678;679;680;681;682;683;684;685;686;687;688;689;690;691;692;696;697;698;699;700;701;702;703;704;705;706;707;708;709;710;711;712;713;714;715;716;717;718;719;720;721;722;723;724;725;726;727;728;729;730;731;732;733;734;735;736;737;738;739;740;741;742;743;744;745;746;747;748;749;750;751;1017;1018;1019;1020;1021;1022;1…	642;675;698;730;1026;1534;2967;3921;4616;4733;7388;7391;7741;8709;8740;9852;9881;9889;9938;9949;16489;21593;22470;23000;23439;23667;23885;23994;24116;25243;25422;28054;28586;28592;30115	249;250;251	29;30;31;32;87	207;225;255	12;170;173;177;193		-1;-1;-1;-1;-1;-1;-1;-1;-1;-1;-1;-1;-1;-1;-1;-1;-1;-1;-1
P13645	Keratin, type I cytoskeletal 10	KRT10	sp|P13645|K1C10_HUMAN Keratin, type I cytoskeletal 10 OS=Homo sapiens GN=KRT10 PE=1 SV=6	34	37	37	29	61.1	49.8	37.3	58.826	0	323.31	583310000	287210000	26	22435000	11046000	79306000	34549000	39	26	500	P13645;CON__sp|P13645|K1C10_HUMAN;CON__sp|P02535|K1C10_MOUSE;Q7Z3Y7;CON__sp|Q7Z3Y7|K1C28_HUMAN;CON__sp|Q148H6|K1C28_BOVIN;Q99456;CON__sp|Q2M2I5|K1C24_HUMAN;CON__sp|Q99456|K1C12_HUMAN;Q7Z3Y8;Q2M2I5;CON__sp|Q7Z3Z0|K1C25_HUMAN;Q7Z3Z0;CON__sp|Q7Z3Y8|K1C27_HUMAN;CON__sp|Q92764|KRT35_HUMAN;CON__sp|Q7Z3Y9|K1C26_HUMAN;CON__sp|O76015|KRT38_HUMAN;CON__sp|O76013|KRT36_HUMAN;CON__sp|Q61765|K1H1_MOUSE;CON__sp…	30	25	30	25	23	19	61.1	53.3	584	584;584;570;464;464;464;494;525;494;459;525;450;450;459;455;468;456;467;416;404;449;404;412;416;455;456;467;404;448;468;449;416;455;448	By MS/MS	By MS/MS	29	46;74;147;353;643;644;1010;1016;1080;1238;1292;1368;1434;1486;1527;1529;1572;1653;1970;2035;2070;2074;2195;2204;2205;2320;2380;2381;2403;2460;2477;2538;2539;2679;2920;3003;3083	True;True;True;True;True;True;True;True;True;True;True;True;True;True;True;True;True;True;True;True;True;True;True;True;True;True;True;True;True;True;True;True;True;True;True;True;True	47;48;80;154;371;683;684;1075;1082;1149;1318;1382;1462;1532;1533;1588;1632;1634;1679;1764;2126;2127;2202;2241;2245;2246;2369;2379;2380;2505;2568;2569;2592;2653;2673;2740;2741;2890;3152;3243;3244;3329	272;273;274;275;276;277;278;279;280;281;282;283;284;285;286;507;508;509;510;511;512;513;514;515;516;517;518;519;520;521;1106;1107;1108;1109;1110;1111;1112;1113;1114;1115;1116;1117;2721;2722;2723;2724;2725;2726;2727;2728;2729;5206;5207;5208;5209;5210;5211;5212;5213;5214;5215;7875;7876;7877;7878;7879;7880;7881;7882;7883;7884;7885;7886;7919;7920;7921;7922;7923;8389;10526;10527;10528;10529;10530;1053…	160;161;162;163;164;165;166;167;168;169;576;577;578;579;580;581;582;583;584;585;586;587;588;1088;1089;1090;1091;1092;1093;1094;1095;1096;1097;1098;1099;1100;1101;1102;1103;1104;1105;1106;1107;1108;1109;1110;1111;1112;1113;1114;1115;1116;1117;1118;1119;1120;2451;2452;2453;2454;2455;2456;2457;2458;2459;5014;5015;5016;5017;5018;5019;5020;5021;5022;5023;5024;7706;7707;7708;7709;7710;7711;7712;7713;77…	163;588;1093;2455;5018;5023;7707;7750;8107;11202;13385;14743;16446;16705;17029;17040;17251;17759;21352;21741;21950;21975;22844;22907;22924;23521;23848;23855;23960;24960;25053;25318;25344;26285;28444;29152;29763	9;22;23;24;25		150;271;291;306;321		+	-1;-1;-1;-1;-1;-1;-1;-1;-1;-1;-1;-1;-1;-1;-1;-1;-1;-1;-1;-1;-1;-1;-1;-1;-1;-1;-1;-1;-1;-1;-1;-1;-1;-1
P17844	Probable ATP-dependent RNA helicase DDX5	DDX5	sp|P17844|DDX5_HUMAN Probable ATP-dependent RNA helicase DDX5 OS=Homo sapiens (Human) OX=9606 GN=DDX5 PE=1 SV=1	1	42	42	32	57.7	54.7	57.7	69.147	0	323.31	737760000	2164100000	32	23055000	67627000	128460000	284580000	51	97	477	P17844	36	42	36	42	27	32	57.7	45.1	614	614	By MS/MS	By MS/MS	127	106;210;399;500;526;613;828;855;886;918;937;1030;1052;1338;1415;1420;1480;1481;1624;1651;1683;1703;1909;1967;2210;2225;2240;2309;2310;2314;2422;2459;2534;2570;2617;2618;2670;2688;2716;2781;2782;3058	True;True;True;True;True;True;True;True;True;True;True;True;True;True;True;True;True;True;True;True;True;True;True;True;True;True;True;True;True;True;True;True;True;True;True;True;True;True;True;True;True;True	113;223;420;532;561;653;885;913;946;978;997;1098;1121;1431;1512;1517;1582;1583;1733;1762;1795;1820;1821;1822;2045;2046;2047;2123;2385;2386;2402;2417;2494;2495;2499;2611;2652;2736;2775;2824;2825;2880;2900;2930;3001;3002;3303	791;792;793;794;795;796;797;798;799;1676;1677;1678;1679;1680;1681;1682;1683;1684;1685;1686;1687;1688;1689;1690;3011;3012;3013;3014;3015;3016;3017;3018;4007;4008;4009;4010;4011;4012;4013;4014;4015;4016;4017;4018;4204;4205;4206;4207;4208;4209;4210;4211;4212;4213;5014;5015;5016;5017;5018;5019;5020;5021;5022;5023;5024;5025;5026;5027;5028;5029;5030;5031;6496;6497;6498;6499;6500;6501;6502;6503;6504;668…	835;836;1629;1630;1631;1632;1633;1634;1635;1636;1637;1638;1639;1640;1641;1642;1643;1644;1645;1646;1647;1648;1649;1650;1651;1652;1653;1654;1655;2688;2689;3756;3757;3758;3759;3760;3761;3762;3763;3764;3765;3766;3767;3768;3769;3770;3934;3935;3936;3937;3938;3939;3940;3941;3942;3943;3944;4880;4881;4882;4883;4884;4885;4886;4887;4888;4889;4890;4891;4892;4893;4894;4895;4896;4897;6540;6541;6542;6543;6544;6…	835;1654;2688;3766;3935;4883;6550;6684;7157;7296;7369;7818;7961;14609;16130;16137;16669;16671;17475;17730;17930;18290;20007;21296;22944;23061;23161;23456;23472;23502;24085;24953;25295;25507;25836;25846;26087;26353;26472;26798;26804;29633	118;119;120;121;122;123;124		106;253;256;277;333;337;369			-1
P35908	Keratin, type II cytoskeletal 2 epidermal	KRT2	sp|P35908|K22E_HUMAN Keratin, type II cytoskeletal 2 epidermal OS=Homo sapiens GN=KRT2 PE=1 SV=2	10	55	55	38	82.6	61	67.4	65.432	0	323.31	393420000	265280000	40	9835400	6632100	169040000	84943000	35	27	451	P35908;CON__sp|P35908|K22E_HUMAN;Q01546;CON__sp|Q01546|K22O_HUMAN;P12035;CON__sp|P12035|K2C3_HUMAN;CON__sp|Q6NXH9|K2C73_MOUSE;CON__sp|Q9R0H5|K2C71_MOUSE;CON__sp|P07744|K2C4_MOUSE;P12036	38	35	38	35	24	24	82.6	65.7	639	639;639;638;638;628;628;539;524;525;1026	By MS/MS	By MS/MS	34	9;225;244;488;504;548;599;737;738;763;784;865;879;880;887;900;904;905;1019;1076;1078;1167;1377;1427;1483;1484;1686;1713;1714;1753;1754;1989;1990;1998;2071;2072;2073;2091;2307;2442;2457;2492;2580;2606;2607;2765;2766;2767;2838;2840;2938;3051;3076;3080;3109	True;True;True;True;True;True;True;True;True;True;True;True;True;True;True;True;True;True;True;True;True;True;True;True;True;True;True;True;True;True;True;True;True;True;True;True;True;True;True;True;True;True;True;True;True;True;True;True;True;True;True;True;True;True;True	10;239;258;519;520;537;538;586;638;789;790;817;838;925;939;940;947;960;964;965;1087;1145;1147;1241;1472;1525;1585;1586;1799;1800;1832;1833;1873;1874;2148;2149;2159;2242;2243;2244;2263;2491;2633;2650;2688;2786;2812;2813;2981;2982;2983;2984;3065;3067;3170;3171;3296;3322;3326;3356	67;68;69;70;71;72;73;74;1798;1799;1800;1801;1802;1923;1924;1925;1926;1927;1928;1929;1930;1931;3903;3904;3905;3906;3907;3908;3909;3910;3911;3912;3913;3914;3915;3916;3917;4043;4044;4045;4046;4047;4048;4049;4050;4051;4052;4053;4054;4419;4420;4421;4916;4917;4918;4919;4920;4921;5868;5869;5870;5871;5872;5873;5874;5875;5876;5877;5878;5879;5880;6035;6036;6037;6038;6039;6040;6041;6042;6173;6174;6175;6176;…	50;51;52;1763;1874;1875;1876;1877;1878;1879;1880;1881;1882;1883;1884;1885;1886;1887;1888;1889;3661;3662;3663;3664;3665;3666;3667;3668;3669;3670;3671;3672;3673;3794;3795;3796;3797;3798;3799;3800;3801;3802;4178;4179;4782;4783;5589;5590;5591;5592;5593;5594;5595;5596;5597;5598;5599;5600;5601;5602;5603;5604;5605;5606;5732;5733;5734;5735;5736;5845;5846;5847;5848;5849;5850;5851;5852;5853;5854;5855;5856;…	50;1763;1884;3667;3801;4178;4783;5592;5604;5734;5871;7051;7122;7135;7168;7214;7253;7258;7782;8071;8091;8778;14802;16185;16674;16697;17954;18329;18333;18588;18590;21451;21453;21523;21956;21961;21966;22168;23445;24510;24939;25139;25585;25729;25744;26673;26682;26691;27987;28015;28600;29606;29693;29743;29943	36;37;38;39;40		216;257;294;337;467		+	-1;-1;-1;-1;-1;-1;-1;-1;-1;-1
P51114	Fragile X mental retardation syndrome-related protein 1	FXR1	sp|P51114|FXR1_HUMAN Fragile X mental retardation syndrome-related protein 1 OS=Homo sapiens (Human) OX=9606 GN=FXR1 PE=1 SV=3	1	33	33	31	50.2	46.9	46.9	69.72	0	323.31	680780000	1456300000	28	24313000	52010000	112790000	170170000	54	75	395	P51114	32	31	32	31	30	29	50.2	47.7	621	621	By MS/MS	By MS/MS	168	67;127;199;347;348;444;445;511;512;540;543;601;650;711;1164;1182;1352;1353;1369;1385;1476;1756;1780;2253;2323;2553;2554;2555;2905;2945;2952;2981;2982	True;True;True;True;True;True;True;True;True;True;True;True;True;True;True;True;True;True;True;True;True;True;True;True;True;True;True;True;True;True;True;True;True	72;134;212;365;366;472;473;545;546;575;576;579;580;640;690;761;1238;1257;1446;1447;1463;1480;1578;1876;1901;2431;2508;2509;2757;2758;2759;3137;3181;3182;3190;3221;3222	455;456;457;458;459;460;943;944;945;946;947;1586;1587;1588;1589;1590;1591;1592;1593;2663;2664;2665;2666;2667;2668;2669;2670;2671;2672;2673;2674;2675;2676;2677;2678;3388;3389;3390;3391;3392;3393;3394;3395;3396;3397;3398;3399;3400;3401;3402;3403;4090;4091;4092;4093;4094;4095;4096;4097;4098;4099;4100;4101;4102;4103;4104;4105;4106;4107;4317;4318;4319;4320;4321;4322;4323;4324;4325;4326;4327;4328;4329;…	532;533;534;535;536;537;538;539;540;541;957;1552;1553;1554;1555;1556;1557;1558;1559;2396;2397;2398;2399;2400;2401;2402;2403;2404;2405;2406;2407;2408;2409;2410;2411;2412;2413;2414;2976;2977;2978;2979;2980;2981;2982;2983;2984;3831;3832;3833;3834;3835;3836;3837;3838;3839;3840;3841;3842;3843;3844;3845;3846;4056;4057;4058;4059;4060;4061;4062;4063;4064;4065;4066;4067;4068;4069;4070;4071;4072;4073;4074;…	532;957;1553;2398;2406;2976;2981;3832;3845;4075;4118;4795;5030;5463;8761;9818;14665;14669;14753;14858;16618;18593;18668;23206;23551;25436;25442;25449;28341;28662;28698;29005;29019	180;181;182;183		187;230;332;366			-1
P11142	Heat shock cognate 71 kDa protein	HSPA8	sp|P11142|HSP7C_HUMAN Heat shock cognate 71 kDa protein OS=Homo sapiens (Human) OX=9606 GN=HSPA8 PE=1 SV=1	2	37	31	29	48.1	44	47.5	70.897	0	323.31	269430000	202950000	33	8164600	6150100	58871000	34217000	31	24	347	P11142;P54652	34	34	28	28	26	26	43.7	42.3	646	646;639	By MS/MS	By MS/MS	114	247;335;356;440;553;589;741;751;1130;1222;1223;1330;1331;1553;1627;1681;1793;1905;1935;1936;1937;1938;1939;2038;2039;2042;2043;2047;2250;2393;2439;2529;2569;2780;2803;2975;3104	True;True;True;True;True;True;True;True;True;True;True;False;False;True;False;True;True;True;True;True;False;False;True;True;True;True;True;True;True;True;True;True;True;False;True;True;True	261;353;374;468;591;628;793;794;804;1202;1299;1300;1423;1424;1658;1736;1793;1914;2040;2041;2084;2085;2086;2087;2088;2089;2090;2091;2092;2205;2206;2209;2210;2211;2212;2216;2217;2427;2428;2581;2582;2630;2730;2774;3000;3027;3215;3351	1956;1957;1958;1959;1960;1961;1962;1963;1964;1965;1966;1967;1968;1969;1970;1971;1972;1973;1974;1975;2603;2604;2605;2606;2607;2608;2747;2748;2749;2750;2751;2752;2753;2754;2755;2756;3355;3356;3357;3358;3359;3360;3361;3362;3363;4435;4436;4437;4438;4439;4440;4441;4861;4862;4863;4864;4865;4866;4867;4868;4869;5892;5893;5894;5895;5896;5897;5898;5899;5900;5901;5902;5903;5904;5905;5959;5960;5961;5962;5963…	1923;1924;1925;1926;1927;1928;1929;1930;1931;1932;1933;1934;1935;1936;1937;1938;1939;1940;1941;1942;1943;1944;1945;1946;1947;1948;2363;2364;2475;2476;2477;2478;2479;2480;2481;2482;2483;2484;2485;2486;2487;2488;2489;2490;2491;2953;4188;4750;4751;5612;5613;5614;5615;5616;5617;5618;5619;5662;5663;5664;5665;5666;5667;5668;5669;5670;5671;5672;8274;8275;8276;8277;8278;8279;8280;8281;8282;8283;10385;103…	1931;2364;2487;2953;4188;4750;5616;5672;8276;10385;10399;14553;14572;17154;17494;17889;18927;19973;21072;21089;21096;21108;21110;21753;21756;21802;21821;21842;23186;23930;24506;25269;25499;26769;27392;28939;29874	94;95;96;97;98;99;100;101		61;87;93;122;127;237;518;549			-1;-1
Q6UN15	Pre-mRNA 3-end-processing factor FIP1	FIP1L1	sp|Q6UN15|FIP1_HUMAN Pre-mRNA 3-end-processing factor FIP1 OS=Homo sapiens (Human) OX=9606 GN=FIP1L1 PE=1 SV=1	1	37	37	37	56.4	32.7	39.7	66.526	0	323.31	51674000	70642000	24	2153100	2943400	14863000	14809000	8	13	345	Q6UN15	19	23	19	23	19	23	56.4	56.4	594	594	By MS/MS	By MS/MS	268	61;72;73;88;201;403;404;517;571;681;682;686;702;1069;1293;1322;1439;1725;1850;1896;2056;2229;2235;2256;2257;2268;2269;2298;2299;2332;2458;2654;2655;2663;3001;3038;3140	True;True;True;True;True;True;True;True;True;True;True;True;True;True;True;True;True;True;True;True;True;True;True;True;True;True;True;True;True;True;True;True;True;True;True;True;True	65;66;77;78;79;94;214;424;425;426;427;428;429;551;609;725;726;727;728;729;730;734;735;752;1138;1383;1414;1415;1538;1844;1973;2027;2028;2226;2406;2412;2434;2435;2436;2447;2448;2479;2480;2481;2519;2651;2863;2864;2872;3241;3281;3389	411;412;413;414;415;416;417;418;419;420;421;422;423;424;425;426;427;428;487;488;489;490;491;492;493;494;495;496;497;498;499;500;501;502;503;504;505;506;621;622;623;624;625;626;627;628;629;1609;1610;1611;1612;1613;1614;1615;1616;1617;1618;1619;1620;1621;1622;1623;1624;1625;3046;3047;3048;3049;3050;3051;3052;3053;3054;3055;3056;3057;3058;3059;3060;3061;3062;3063;3064;3065;3066;3067;3068;3069;3070;3…	473;474;475;476;477;478;479;480;481;482;483;484;485;486;487;488;489;490;491;492;493;494;495;496;497;498;499;500;501;502;503;504;505;506;507;508;509;510;511;512;513;514;515;516;517;518;519;520;521;569;570;571;572;573;574;575;651;652;653;654;655;656;657;658;659;660;661;662;663;664;665;666;667;668;1569;1570;1571;1572;1573;1574;1575;1576;1577;1578;1579;1580;1581;1582;1583;1584;1585;1586;1587;1588;158…	509;571;573;660;1595;2713;2727;3895;4646;5291;5344;5368;5431;8013;13392;13689;16469;18463;19275;19648;21902;23092;23113;23225;23231;23311;23320;23393;23395;23610;24949;25999;26013;26052;29115;29339;30121	262;263	38;39;40;41;42;93	197;218	259;492;494;496;500;554		-1
P00761	Trypsin		sp|P00761|TRYP_PIG Trypsin OS=Sus scrofa PE=1 SV=1	1	8	8	8	43.3	43.3	43.3	24.409	0	323.31	3737500000	3375400000	11	339770000	306850000	2378300000	1310900000	44	32	326	CON__sp|P00761|TRYP_PIG	8	8	8	8	8	8	43.3	43.3	231	231	By MS/MS	By MS/MS	8	220;1231;1232;1594;1804;2353;2548;2826	True;True;True;True;True;True;True;True	234;1308;1309;1310;1702;1926;2541;2752;3051	1769;1770;1771;1772;1773;1774;1775;1776;1777;10125;10126;10127;10128;10129;10130;10131;10132;10133;10134;10135;10136;10137;10138;10139;10140;10141;10142;10143;10144;10145;10146;10147;10148;10149;10150;10151;10152;10153;10154;10155;10156;10157;10158;10159;10160;15546;15547;15548;15549;15550;15551;15552;15553;15554;15555;15556;15557;15558;15559;15560;15561;17386;17387;17388;17389;17390;17391;17392;…	1749;1750;1751;1752;1753;1754;1755;1756;10465;10466;10467;10468;10469;10470;10471;10472;10473;10474;10475;10476;10477;10478;10479;10480;10481;10482;10483;10484;10485;10486;10487;10488;10489;10490;10491;10492;10493;10494;10495;10496;10497;10498;10499;10500;10501;10502;10503;10504;10505;10506;10507;10508;10509;10510;17312;17313;17314;17315;17316;17317;17318;17319;17320;17321;17322;17323;17324;17325…	1754;10505;10510;17315;19030;23740;25411;27622	4		94		+	-1
P04843	Dolichyl-diphosphooligosaccharide--protein glycosyltransferase subunit 1	RPN1	sp|P04843|RPN1_HUMAN Dolichyl-diphosphooligosaccharide--protein glycosyltransferase subunit 1 OS=Homo sapiens (Human) OX=9606 GN=RPN1 PE=1 SV=1	1	32	32	32	57.5	57.5	47	68.569	0	323.31	433030000	592600000	37	11703000	16016000	51342000	54353000	39	42	322	P04843	31	27	31	27	31	27	57.5	57.5	607	607	By MS/MS	By MS/MS	91	182;204;205;285;412;483;493;794;826;863;1072;1151;1315;1502;1549;1550;1652;1735;1973;2011;2132;2178;2294;2315;2376;2640;2684;2787;2811;2812;2898;2996	True;True;True;True;True;True;True;True;True;True;True;True;True;True;True;True;True;True;True;True;True;True;True;True;True;True;True;True;True;True;True;True	191;217;218;300;437;513;525;850;883;923;1141;1224;1405;1605;1654;1655;1763;1855;2131;2173;2306;2352;2474;2500;2564;2847;2896;3007;3036;3037;3127;3128;3236	1472;1473;1474;1475;1476;1477;1478;1479;1480;1481;1482;1483;1484;1485;1486;1487;1488;1489;1633;1634;1635;1636;1637;1638;1639;1640;1641;1642;1643;1644;1645;1646;1647;1648;1649;1650;1651;1652;1653;1654;1655;1656;1657;1658;2235;2236;2237;2238;2239;2240;2241;2242;2243;2244;2245;2246;2247;2248;2249;3155;3156;3157;3158;3159;3160;3161;3162;3163;3869;3870;3871;3872;3873;3874;3875;3876;3877;3941;3942;3943…	1459;1460;1461;1462;1463;1464;1465;1466;1467;1468;1469;1470;1471;1472;1473;1474;1475;1476;1477;1478;1479;1480;1481;1482;1483;1484;1600;1601;1602;1603;1604;1605;1606;1607;1608;1609;1610;1611;1612;1613;1614;1615;1616;1617;1618;1619;1620;2122;2123;2124;2125;2126;2127;2128;2129;2130;2131;2132;2133;2802;2803;2804;2805;3628;3629;3630;3631;3632;3633;3634;3635;3691;3692;3693;3694;3695;3696;3697;3698;3699…	1482;1613;1619;2130;2803;3628;3706;5930;6536;7040;8037;8666;13472;16867;17115;17119;17737;18533;21366;21573;22383;22792;23387;23506;23834;25933;26318;26924;27440;27447;28313;29104	70		230			-1
P54136	Arginine--tRNA ligase, cytoplasmic	RARS	sp|P54136|SYRC_HUMAN Arginine--tRNA ligase, cytoplasmic OS=Homo sapiens (Human) OX=9606 GN=RARS1 PE=1 SV=2	1	31	31	31	48.8	45	47	75.378	0	128.1	227730000	254100000	37	6154900	6867600	44120000	38925000	34	33	231	P54136	29	30	29	30	29	30	48.8	48.8	660	660	By MS/MS	By MS/MS	173	36;311;745;746;792;868;872;882;883;973;1100;1253;1339;1351;1460;1511;1586;1684;1701;1715;1751;1912;1914;1950;2015;2364;2489;2574;2850;2909;3067	True;True;True;True;True;True;True;True;True;True;True;True;True;True;True;True;True;True;True;True;True;True;True;True;True;True;True;True;True;True;True	37;329;798;799;848;928;932;942;943;1035;1170;1336;1432;1445;1561;1615;1616;1693;1796;1816;1817;1834;1871;2052;2054;2055;2106;2179;2180;2552;2685;2779;3078;3141;3312	211;212;213;214;215;216;217;218;219;220;221;222;223;224;225;226;227;228;2457;2458;2459;2460;2461;2462;2463;2464;2465;5920;5921;5922;5923;5924;5925;5926;5927;5928;5929;5930;5931;6235;6236;6237;6238;6239;6240;6241;6242;6914;6915;6916;6917;6918;6919;6920;6921;6922;6937;6938;6939;6940;6941;6942;6943;6944;6945;6946;6947;6948;6949;6950;6951;6952;6953;6954;7007;7008;7009;7010;7011;7012;7013;7014;7015;70…	134;135;136;137;138;139;140;141;142;2275;2276;2277;2278;2279;2280;2281;2282;2283;5625;5626;5627;5628;5629;5630;5631;5632;5633;5919;5920;5921;5922;5923;5924;5925;5926;7059;7060;7061;7062;7063;7064;7065;7066;7079;7080;7081;7082;7083;7084;7085;7086;7087;7088;7089;7090;7091;7092;7093;7094;7095;7096;7097;7098;7099;7100;7101;7137;7138;7139;7140;7141;7142;7143;7144;7145;7146;7147;7148;7149;7150;7151;715…	140;2277;5625;5632;5924;7065;7084;7140;7150;7535;8147;12249;14613;14664;16576;16920;17291;17938;18250;18336;18583;20088;20091;21219;21612;23771;25129;25528;28063;28364;29653	191;192;193		342;463;554			-1
Q99661	Kinesin-like protein KIF2C	KIF2C	sp|Q99661|KIF2C_HUMAN Kinesin-like protein KIF2C OS=Homo sapiens (Human) OX=9606 GN=KIF2C PE=1 SV=2	3	23	23	23	39.9	37.1	39.9	81.312	0	290.08	382740000	511500000	37	10344000	13824000	51843000	51876000	38	39	228	Q99661;Q8N4N8;O00139	22	23	22	23	22	23	39.9	39.9	725	725;673;706	By MS/MS	By MS/MS	333	70;227;275;279;333;462;552;808;816;1018;1384;1510;1585;1884;1941;2095;2130;2190;2423;2626;2677;2760;2923	True;True;True;True;True;True;True;True;True;True;True;True;True;True;True;True;True;True;True;True;True;True;True	75;241;289;293;294;351;490;590;864;872;1086;1479;1613;1614;1692;2013;2095;2096;2267;2304;2364;2612;2833;2887;2888;2976;3155	472;473;474;475;476;477;478;1809;1810;1811;1812;1813;1814;1815;2173;2174;2175;2176;2177;2178;2179;2180;2181;2191;2192;2193;2194;2195;2196;2197;2198;2199;2200;2201;2202;2203;2204;2205;2206;2207;2208;2209;2210;2211;2212;2213;2214;2588;2589;2590;2591;2592;2593;3677;3678;3679;3680;3681;3682;4432;4433;4434;6338;6339;6340;6341;6342;6343;6344;6345;6346;6376;6377;6378;6379;6380;6381;6382;6383;6384;6385;6…	552;553;554;555;556;557;558;559;560;561;562;1766;1767;1768;1769;1770;1771;1772;1773;1774;1775;2074;2075;2076;2077;2078;2079;2080;2081;2082;2086;2087;2088;2089;2090;2091;2092;2093;2094;2095;2096;2097;2098;2099;2100;2101;2102;2103;2104;2105;2106;2107;2108;2109;2355;2356;3409;3410;3411;3412;3413;3414;3415;3416;4187;5978;5979;5980;5981;5982;5983;5984;5985;5986;5987;5988;5989;5990;5991;5992;6015;6016;…	562;1767;2074;2103;2356;3416;4187;5985;6025;7770;14850;16908;17288;19585;21132;22184;22373;22827;24089;25887;26264;26662;28495	288;289;290;291;292;293;294;295;296		164;169;250;358;511;561;631;638;708			-1;-1;-1
P29401	Transketolase	TKT	sp|P29401|TKT_HUMAN Transketolase OS=Homo sapiens (Human) OX=9606 GN=TKT PE=1 SV=3	1	26	26	26	49.6	47.8	35.8	67.877	0	200.49	180220000	112010000	25	7208700	4480300	21548000	11080000	20	12	197	P29401	24	20	24	20	24	20	49.6	49.6	623	623	By MS/MS	By MS/MS	143	292;358;932;1110;1210;1248;1309;1367;1414;1555;1603;1741;1890;1891;1917;2025;2055;2104;2407;2453;2454;2588;2768;2797;2921;2922	True;True;True;True;True;True;True;True;True;True;True;True;True;True;True;True;True;True;True;True;True;True;True;True;True;True	309;376;992;1181;1285;1330;1399;1461;1511;1660;1711;1712;1861;2019;2020;2021;2022;2058;2192;2225;2276;2277;2596;2646;2647;2794;2985;3021;3153;3154	2325;2326;2327;2328;2329;2330;2331;2332;2333;2334;2774;2775;2776;2777;2778;2779;2780;7366;7367;7368;7369;7370;7371;7372;7373;7374;7375;7376;8566;8567;8568;8569;8570;8571;8572;8573;8574;9759;9760;9761;9762;9763;9764;9765;9766;9767;11400;11401;11402;11403;11404;11405;11406;11407;11408;11409;11410;11411;11412;11413;11414;12244;12245;12246;12247;12248;12249;12250;12251;12252;12253;12254;12255;12256;1…	2182;2183;2184;2185;2186;2187;2188;2189;2190;2524;2525;2526;7351;7352;7353;7354;7355;7356;7357;7358;8213;8214;9980;9981;12224;12225;12226;12227;12228;12229;12230;12231;12232;13445;13446;13447;13448;13449;13450;13451;13452;13453;13454;14729;14730;14731;14732;14733;14734;14735;14736;14737;14738;14739;14740;16108;16109;16110;16111;16112;16113;16114;16115;16116;16117;16118;16119;16120;16121;16122;161…	2187;2524;7357;8213;9980;12229;13450;14729;16123;17167;17387;18557;19613;19617;20102;21714;21897;22245;23986;24899;24900;25623;26697;27366;28479;28490	134;135;136;137		1;135;199;604			-1
P60709;P63261	Actin, cytoplasmic 1;Actin, cytoplasmic 1, N-terminally processed;Actin, cytoplasmic 2;Actin, cytoplasmic 2, N-terminally processed	ACTB;ACTG1	sp|P60709|ACTB_HUMAN Actin, cytoplasmic 1 OS=Homo sapiens (Human) OX=9606 GN=ACTB PE=1 SV=1;sp|P63261|ACTG_HUMAN Actin, cytoplasmic 2 OS=Homo sapiens (Human) OX=9606 GN=ACTG1 PE=1 SV=1	8	16	16	6	53.1	48.5	47.5	41.736	0	215.8	204840000	507120000	20	10242000	25356000	45023000	89355000	24	34	192	P60709;P63261;Q6S8J3;A5A3E0;P0CG38;Q562R1;P0CG39;Q9BYX7	15	15	15	15	5	5	53.1	29.1	375	375;375;1075;1075;1075;376;1038;375	By MS/MS	By MS/MS	177	101;295;296;367;434;436;468;469;602;1050;1109;1348;2127;2596;2775;2823	True;True;True;True;True;True;True;True;True;True;True;True;True;True;True;True	108;312;313;385;459;461;496;497;641;642;1119;1179;1180;1442;2301;2802;2994;2995;3048	766;767;768;769;770;771;772;773;774;2345;2346;2347;2348;2349;2350;2351;2352;2353;2354;2355;2356;2357;2358;2359;2360;2361;2362;2363;2364;2365;2366;2367;2368;2829;2830;2831;2832;3276;3277;3278;3279;3280;3281;3282;3283;3284;3287;3288;3289;3290;3291;3725;3726;3727;3728;3729;3730;3731;3732;3733;3734;3735;3736;3737;3738;3739;3740;3741;3742;3743;3744;3745;3746;3747;3748;3749;3750;4938;4939;4940;4941;494…	813;814;815;816;817;818;819;820;821;822;823;824;2206;2207;2208;2209;2210;2211;2212;2213;2214;2215;2216;2217;2218;2219;2220;2221;2222;2223;2224;2225;2226;2227;2555;2556;2557;2558;2879;2880;2881;2882;2883;2885;2886;3443;3444;3445;3446;3447;3448;3449;3450;3451;3452;3453;3454;3455;3456;3457;3458;3459;3460;3461;3462;3463;3464;3465;3466;3467;3468;3469;3470;4805;4806;4807;4808;4809;4810;4811;4812;4813;4…	815;2206;2211;2555;2879;2886;3444;3454;4821;7939;8205;14644;22358;25668;26741;27472	194;195;196;197;198;199		16;44;47;153;305;325			-1;-1;-1;-1;-1;-1;-1;-1
Q96T51	RUN and FYVE domain-containing protein 1	RUFY1	sp|Q96T51|RUFY1_HUMAN RUN and FYVE domain-containing protein 1 OS=Homo sapiens (Human) OX=9606 GN=RUFY1 PE=1 SV=2	1	28	28	28	39	39	37.9	79.817	0	228.01	227540000	203440000	41	5549800	4961800	25434000	19795000	33	28	185	Q96T51	27	26	27	26	27	26	39	39	708	708	By MS/MS	By MS/MS	332	128;202;235;473;481;495;618;636;637;911;1101;1145;1146;1323;1540;1662;1663;1745;1765;1886;1955;2118;2119;2137;2387;2731;2829;2930	True;True;True;True;True;True;True;True;True;True;True;True;True;True;True;True;True;True;True;True;True;True;True;True;True;True;True;True	135;215;249;502;511;527;658;676;677;971;1171;1218;1219;1416;1645;1773;1774;1865;1885;2015;2111;2292;2293;2311;2575;2946;3056;3162	948;949;950;951;952;953;1626;1627;1628;1629;1630;1869;1870;1871;1872;1873;1874;1875;1876;1877;3776;3777;3778;3779;3780;3781;3782;3854;3855;3856;3857;3858;3859;3860;3861;3862;3959;3960;3961;3962;3963;3964;3965;3966;3967;3968;3969;3970;3971;3972;3973;3974;3975;3976;3977;3978;3979;5048;5049;5050;5051;5052;5152;5153;5154;5155;5156;5157;5158;5159;5160;5161;5162;5163;5164;5165;5166;5167;5168;5169;5170;…	958;1598;1830;1831;1832;1833;1834;1835;1836;1837;1838;1839;1840;3485;3486;3487;3488;3626;3721;3722;3723;3724;3725;3726;3727;3728;3729;3730;3731;3732;3733;3734;3735;3736;3737;3738;3739;3740;3741;4912;4913;4914;4974;4975;4976;4977;4978;4979;4980;4981;4982;4983;4984;4985;4986;4987;4988;4989;4990;4991;4992;4993;4994;4995;4996;4997;4998;7282;7283;7284;7285;8150;8151;8152;8153;8154;8155;8156;8157;8632;…	958;1598;1838;3487;3626;3737;4914;4981;4996;7285;8150;8632;8634;13698;17074;17795;17802;18566;18627;19592;21233;22326;22332;22400;23904;26552;27945;28526	284;285;286;287		117;119;120;427			-1
Q10570	Cleavage and polyadenylation specificity factor subunit 1	CPSF1	sp|Q10570|CPSF1_HUMAN Cleavage and polyadenylation specificity factor subunit 1 OS=Homo sapiens (Human) OX=9606 GN=CPSF1 PE=1 SV=2	1	47	47	47	35.1	1.8	1	160.88	0	323.31	1806700	1601000	69	26184	23203	17842	11962	0	0	177	Q10570	3	2	3	2	3	2	35.1	35.1	1443	1443	By MS/MS	By MS/MS	207	62;68;345;394;507;508;551;563;697;878;885;989;1054;1077;1170;1316;1317;1333;1361;1409;1416;1467;1477;1602;1614;1676;1749;1811;1854;1910;1923;1924;1961;1968;2005;2069;2133;2377;2544;2710;2715;2834;2935;2953;3036;3103;3123	True;True;True;True;True;True;True;True;True;True;True;True;True;True;True;True;True;True;True;True;True;True;True;True;True;True;True;True;True;True;True;True;True;True;True;True;True;True;True;True;True;True;True;True;True;True;True	67;73;363;415;541;542;589;601;747;938;945;1054;1123;1146;1244;1406;1407;1426;1455;1506;1513;1568;1579;1710;1723;1787;1788;1869;1933;1977;2048;2049;2066;2067;2068;2117;2124;2166;2167;2240;2307;2565;2748;2924;2929;3061;3167;3191;3279;3350;3370;3371	429;430;431;461;462;463;464;465;466;467;468;469;470;2653;2654;2655;2656;2657;2658;2659;2660;2983;2984;2985;2986;2987;2988;4065;4066;4067;4068;4069;4070;4071;4072;4073;4074;4075;4076;4077;4426;4427;4428;4429;4430;4431;4717;4718;4719;5614;5615;5616;5617;5618;5619;5620;6981;6982;6983;6984;6985;6986;6987;6988;6989;7029;7030;7762;7763;7764;8226;8227;8228;8229;8356;8357;8358;9479;9480;9481;9482;9483;94…	522;523;542;543;544;545;546;547;548;549;550;2387;2388;2389;2390;2391;2392;2676;2677;2678;2679;3814;3815;3816;3817;3818;3819;3820;3821;3822;3823;3824;4183;4184;4185;4186;4620;4621;5401;5402;5403;5404;5405;5406;7112;7113;7114;7115;7116;7117;7156;7638;7639;7640;7963;7964;7965;8072;8073;8074;8075;8076;9762;9763;9764;13477;13478;13479;13480;14583;14709;14710;14711;14712;14713;14714;15225;16133;16594;1…	522;544;2390;2679;3815;3823;4184;4621;5404;7114;7156;7638;7964;8075;9763;13477;13480;14583;14713;15225;16133;16596;16640;17368;17411;17865;18579;19099;19282;20040;20128;20141;21249;21310;21546;21947;22390;23841;25392;26445;26468;27959;28568;28699;29327;29864;29995	215;216;217;218;219;220;221;222;223		354;966;1050;1103;1228;1279;1282;1361;1369			-1
P21589	5-nucleotidase	NT5E	sp|P21589|5NTD_HUMAN 5-nucleotidase OS=Homo sapiens (Human) OX=9606 GN=NT5E PE=1 SV=1	1	22	22	22	36.4	35.9	32.6	63.367	0	323.31	295450000	609900000	27	10943000	22589000	43990000	72079000	33	42	172	P21589	20	21	20	21	20	21	36.4	36.4	574	574	By MS/MS	By MS/MS	133	80;135;520;719;793;838;983;1062;1211;1212;1362;1479;1580;2690;2910;2931;2964;2968;3025;3090;3128;3129	True;True;True;True;True;True;True;True;True;True;True;True;True;True;True;True;True;True;True;True;True;True	86;142;554;770;849;895;896;1047;1131;1286;1287;1288;1289;1456;1581;1687;2903;3142;3163;3203;3204;3208;3268;3336;3376;3377	561;562;563;564;565;566;567;568;569;1011;1012;1013;1014;1015;1016;1017;1018;4166;4167;4168;5733;5734;5735;5736;5737;5738;5739;5740;6243;6244;6245;6246;6247;6248;6249;6250;6572;6573;6574;6575;6576;6577;6578;6579;6580;6581;6582;6583;6584;6585;6586;6587;6588;6589;6590;7721;7722;7723;7724;7725;7726;7727;7728;7729;8268;8269;8270;8271;8272;8273;8274;8275;8276;8277;8278;8279;8280;8281;8282;8283;9768;976…	607;608;609;610;611;612;613;614;615;616;1005;1006;3907;5488;5489;5490;5927;5928;5929;6592;6593;6594;6595;6596;6597;6598;6599;6600;6601;6602;6603;6604;6605;6606;6607;7611;7612;7613;7614;7615;7616;7617;7987;7988;7989;7990;7991;7992;7993;7994;7995;7996;7997;7998;7999;8000;8001;8002;9982;9983;9984;9985;9986;9987;9988;9989;9990;9991;9992;9993;9994;9995;9996;9997;9998;9999;10000;10001;10002;10003;10004…	609;1005;3907;5488;5927;6595;7611;7989;9992;10006;14715;16648;17276;26364;28371;28552;28887;28894;29273;29798;30020;30036	128;129;130		105;225;489			-1
Q9UQ35	Serine/arginine repetitive matrix protein 2	SRRM2	sp|Q9UQ35|SRRM2_HUMAN Serine/arginine repetitive matrix protein 2 OS=Homo sapiens (Human) OX=9606 GN=SRRM2 PE=1 SV=2	1	26	26	26	9.7	2.6	2.3	299.61	0	250.58	2052100	1853000	120	17101	15442	157290	118360	0	0	172	Q9UQ35	6	6	6	6	6	6	9.7	9.7	2752	2752	By matching	By matching	395	249;578;579;1441;1876;1899;1927;2083;2087;2285;2300;2326;2335;2488;2523;2542;2605;2623;2733;2744;2745;2748;2771;2955;2962;2987	True;True;True;True;True;True;True;True;True;True;True;True;True;True;True;True;True;True;True;True;True;True;True;True;True;True	263;616;617;1540;1541;2002;2003;2031;2032;2073;2255;2259;2464;2465;2482;2483;2484;2512;2513;2522;2684;2724;2744;2745;2746;2811;2830;2948;2960;2961;2964;2988;3194;3201;3227	1977;1978;1979;1980;1981;1982;1983;1984;4783;4784;4785;4786;4787;4788;4789;4790;4791;4792;4793;14447;14448;14449;14450;14451;14452;17947;17948;17949;17950;17951;17952;17953;17954;17955;17956;17957;17958;17959;18141;18142;18143;18144;18145;18146;18147;18148;18149;18150;18151;18152;18450;18451;18452;20405;20406;20407;20452;20453;21864;21865;21866;21867;21868;21869;21965;21966;21967;21968;21969;2197…	1950;1951;1952;1953;4662;4663;4664;4665;4666;4667;4668;4669;4670;4671;4672;4673;4674;4675;4676;4677;4678;4679;4680;4681;16477;16478;16479;16480;16481;19529;19530;19531;19532;19533;19534;19535;19536;19537;19538;19539;19540;19541;19542;19543;19544;19545;19546;19547;19548;19549;19550;19712;19713;19714;19715;19716;19717;19718;19719;19720;19721;19722;19723;19724;19725;19726;19727;19728;19729;19730;197…	1950;4666;4678;16479;19539;19736;20155;22019;22056;23358;23424;23581;23633;25124;25246;25384;25707;25875;26555;26601;26604;26629;26726;28717;28871;29058	345;346;347	58;59;60;61;62;63;64;65;66;107;108	2371;2419;2431	2398;2407;2409;2426;2581;2583;2664;2688;2694;2702;2706		-1
P02769	Serum albumin	ALB	sp|P02769|ALBU_BOVIN Serum albumin OS=Bos taurus GN=ALB PE=1 SV=4	1	33	33	29	56.7	24.1	39.4	69.293	0	323.31	133690000	253570000	40	3342400	6339300	21485000	33236000	9	22	170	CON__sp|P02769|ALBU_BOVIN	17	24	17	24	15	22	56.7	51.6	607	607	By MS/MS	By MS/MS	22	318;319;320;474;513;536;538;539;722;775;1104;1458;1478;1541;1596;1640;1649;1842;2123;2171;2259;2260;2275;2424;2425;2474;2628;2794;2888;2889;2958;3096;3122	True;True;True;True;True;True;True;True;True;True;True;True;True;True;True;True;True;True;True;True;True;True;True;True;True;True;True;True;True;True;True;True;True	336;337;338;503;547;571;573;574;773;829;1174;1559;1580;1646;1704;1751;1760;1965;2297;2345;2438;2439;2454;2613;2614;2670;2835;3018;3117;3118;3197;3343;3369	2519;2520;2521;2522;2523;2524;2525;3783;3784;3785;3786;3787;3788;3789;3790;3791;3792;3793;3794;4108;4109;4110;4111;4271;4272;4273;4274;4275;4276;4277;4278;4279;4280;4281;4282;4283;4284;4285;4286;4287;4288;4294;4295;4296;4297;4298;4299;4300;4301;4302;4303;4304;4305;4306;4307;4308;4309;4310;4311;4312;4313;4314;4315;4316;5748;5749;5750;6111;6112;6113;6114;8498;8499;8500;8501;8502;8503;8504;8505;1453…	2324;2325;2326;2327;2328;3489;3490;3491;3492;3493;3494;3847;3848;3849;4001;4002;4003;4004;4005;4006;4007;4008;4009;4010;4011;4012;4013;4014;4015;4016;4017;4018;4019;4020;4021;4022;4023;4024;4025;4026;4027;4028;4029;4030;4031;4032;4037;4038;4039;4040;4041;4042;4043;4044;4045;4046;4047;4048;4049;4050;4051;4052;4053;4054;4055;5498;5499;5774;5775;5776;5777;5778;8164;8165;8166;8167;8168;8169;8170;1654…	2324;2326;2327;3491;3849;4004;4038;4052;5499;5777;8170;16543;16645;17077;17359;17551;17726;19180;22345;22779;23264;23266;23336;24094;24096;25040;25892;26995;28255;28259;28722;29833;29990					+	-1
P27694	Replication protein A 70 kDa DNA-binding subunit;Replication protein A 70 kDa DNA-binding subunit, N-terminally processed	RPA1	sp|P27694|RFA1_HUMAN Replication protein A 70 kDa DNA-binding subunit OS=Homo sapiens (Human) OX=9606 GN=RPA1 PE=1 SV=2	1	22	22	22	45.1	37.5	43.2	68.137	0	293.72	80234000	453700000	30	2674500	15123000	16796000	57203000	12	42	142	P27694	18	21	18	21	18	21	45.1	45.1	616	616	By MS/MS	By MS/MS	139	13;272;288;321;417;465;657;759;774;860;1188;1589;1982;2405;2456;2858;2877;2899;2916;3021;3030;3033	True;True;True;True;True;True;True;True;True;True;True;True;True;True;True;True;True;True;True;True;True;True	14;286;303;304;339;442;493;699;812;828;919;1263;1697;2140;2141;2594;2649;3086;3105;3106;3129;3148;3262;3273;3276	88;89;90;91;92;93;94;95;96;97;98;99;100;101;102;103;104;105;106;2145;2146;2147;2148;2149;2150;2151;2277;2278;2279;2280;2281;2282;2283;2284;2285;2286;2287;2288;2289;2290;2291;2292;2293;2294;2295;2296;2297;2298;2299;2300;2301;2302;2303;2304;2305;2306;2526;2527;2528;2529;2530;2531;2532;2533;2534;3193;3194;3195;3196;3197;3198;3199;3200;3201;3202;3203;3695;3696;3697;3698;3699;3700;3701;3702;3703;3704;…	59;60;61;62;63;64;65;66;67;68;69;70;71;72;73;74;75;76;77;78;79;2040;2041;2042;2043;2044;2158;2159;2160;2161;2162;2163;2164;2165;2166;2167;2168;2169;2329;2330;2331;2332;2333;2334;2814;2815;2816;2817;2818;2819;2820;2821;2822;2823;3422;3423;3424;3425;3426;3427;3428;3429;3430;3431;3432;5056;5686;5773;6730;6731;6732;9836;17302;17303;17304;17305;21408;21409;23978;23979;23980;23981;23982;23983;23984;249…	62;2042;2160;2329;2815;3423;5056;5686;5773;6731;9836;17303;21408;23979;24911;28088;28191;28317;28411;29265;29291;29309	131;132;133		14;477;592			-1
P35527	Keratin, type I cytoskeletal 9	KRT9	sp|P35527|K1C9_HUMAN Keratin, type I cytoskeletal 9 OS=Homo sapiens GN=KRT9 PE=1 SV=3	2	22	21	21	45.7	42.7	33.9	62.064	0	323.31	162750000	140410000	26	6259400	5400400	29889000	23458000	17	13	135	P35527;CON__sp|P35527|K1C9_HUMAN	21	18	20	17	20	17	45.7	45.7	623	623;623	By MS/MS	By MS/MS	33	407;593;814;815;901;902;1014;1239;1283;1399;1527;1528;1926;2128;2141;2220;2366;2404;2578;2702;2706;2969	True;True;True;True;True;True;True;True;True;True;False;True;True;True;True;True;True;True;True;True;True;True	432;632;870;871;961;962;1079;1319;1320;1373;1496;1632;1633;2071;2072;2302;2315;2397;2554;2593;2783;2784;2916;2920;3209	3126;3127;3128;3129;3130;3131;3132;3133;4879;4880;4881;4882;4883;4884;4885;4886;4887;6364;6365;6366;6367;6368;6369;6370;6371;6372;6373;6374;6375;7135;7136;7137;7138;7139;7140;7141;7142;7143;7144;7145;7146;7147;7148;7149;7150;7151;7152;7153;7154;7155;7156;7901;7902;7903;7904;10535;10536;10537;10538;10539;10540;10541;10542;10543;10544;10545;10546;10547;10548;10549;10550;10551;10552;10553;10554;1055…	2771;2772;2773;2774;2775;4757;4758;4759;4760;4761;4762;4763;4764;4765;6009;6010;6011;6012;6013;6014;7222;7223;7224;7225;7226;7227;7228;7229;7230;7231;7232;7733;11203;11204;11205;11206;11207;11208;11209;11210;11211;11212;11213;11214;11215;11216;13013;13014;15059;15060;15061;15062;15063;15064;15065;15066;15067;17027;17028;17029;17030;17031;17032;17033;17034;17035;20147;20148;20149;20150;20151;20152…	2773;4764;6009;6011;7222;7232;7733;11204;13013;15061;17029;17033;20150;22365;22432;23006;23780;23975;25562;26412;26438;28899	30;31;32;33;34;35		157;245;269;276;286;326		+	-1;-1
Q14498	RNA-binding protein 39	RBM39	sp|Q14498|RBM39_HUMAN RNA-binding protein 39 OS=Homo sapiens (Human) OX=9606 GN=RBM39 PE=1 SV=2	2	17	17	17	37.2	34.2	35.3	59.379	0	269.12	64171000	91403000	24	2673800	3808400	14262000	17195000	11	15	130	Q14498;Q86U06	15	16	15	16	15	16	37.2	37.2	530	530;439	By MS/MS	By MS/MS	223	5;154;337;418;421;924;1043;1044;1079;1175;2045;2630;2660;2789;2874;2927;3141	True;True;True;True;True;True;True;True;True;True;True;True;True;True;True;True;True	5;6;161;355;443;446;984;1111;1112;1148;1249;1250;2214;2837;2869;3009;3010;3102;3159;3390	34;35;36;37;38;39;40;41;42;43;44;45;46;47;48;1161;1162;1163;1164;1165;2612;2613;2614;2615;2616;2617;2618;2619;2620;3204;3205;3206;3207;3208;3209;3210;3211;3212;3225;3226;3227;3228;3229;3230;3231;3232;3233;7302;7303;7304;7305;7306;7307;7308;7309;7310;8127;8128;8129;8130;8131;8132;8133;8134;8135;8136;8137;8138;8376;8377;8378;8379;8380;8381;8382;8383;8384;8385;8386;8387;8388;9515;9516;9517;9518;9519…	22;23;24;25;26;27;28;29;30;31;32;33;34;35;36;37;38;39;40;1142;1143;1144;1145;2366;2367;2368;2369;2370;2371;2824;2825;2826;2827;2828;2829;2830;2831;2832;2838;2839;2840;2841;2842;2843;2844;2845;2846;2847;2848;2849;2850;2851;2852;2853;2854;2855;7317;7318;7319;7320;7321;7322;7323;7324;7325;7326;7327;7328;7898;7899;7900;7901;8095;8096;8097;8098;8099;8100;8101;8102;8103;8104;8105;8106;9794;9795;9796;97…	29;1145;2367;2831;2842;7318;7898;7900;8102;9796;21828;25901;26023;26933;28179;28516;30122	236;237;238;239;240	27;28	158;238;282;283;321	97;136		-1;-1
Q14247	Src substrate cortactin	CTTN	sp|Q14247|SRC8_HUMAN Src substrate cortactin OS=Homo sapiens (Human) OX=9606 GN=CTTN PE=1 SV=2	1	28	28	28	46.7	22.9	24.4	61.585	0	323.31	8841100	11761000	27	327450	435610	1395800	1805900	2	4	129	Q14247	12	15	12	15	12	15	46.7	46.7	550	550	By MS/MS	By MS/MS	221	137;315;608;689;770;771;772;988;1060;1070;1732;1758;1759;1879;1948;2117;2349;2350;2351;2641;2756;2798;2842;3086;3087;3088;3092;3093	True;True;True;True;True;True;True;True;True;True;True;True;True;True;True;True;True;True;True;True;True;True;True;True;True;True;True;True	144;333;648;739;824;825;826;1052;1053;1129;1139;1851;1852;1878;1879;2006;2007;2104;2291;2536;2537;2538;2848;2972;3022;3069;3332;3333;3334;3338;3339	1025;1026;1027;2486;2487;2488;2489;2490;2491;2492;2493;2494;4991;4992;4993;5585;5586;5587;6072;6073;6074;6075;6076;6077;6078;6079;6080;6081;6082;6083;6084;6085;6086;6087;6088;6089;6090;6091;6092;6093;7751;7752;7753;7754;7755;7756;7757;7758;7759;7760;7761;8260;8261;8262;8263;8264;8265;8310;8311;8312;8313;16840;16841;16842;16843;16844;16845;16846;16847;16999;17000;17001;17002;17003;17004;17005;1700…	1009;1010;2291;2292;2293;2294;2295;2296;4869;4870;5382;5383;5750;5751;5752;5753;5754;5755;5756;5757;5758;5759;5760;5761;5762;5763;5764;5765;7627;7628;7629;7630;7631;7632;7633;7634;7635;7636;7637;7982;7983;7984;7985;8019;8020;8021;8022;18514;18515;18516;18517;18518;18519;18606;18607;18608;18609;18610;18611;19553;19554;19555;19556;19557;19558;21210;21211;21212;21213;21214;21215;22324;22325;23720;23…	1009;2296;4869;5382;5750;5759;5763;7634;7983;8020;18517;18606;18611;19555;21210;22325;23722;23727;23732;25939;26646;27367;28022;29781;29793;29795;29801;29803	233;234	25;26;84;85	317;448	399;401;405;418		-1
P09211	Glutathione S-transferase P	GSTP1	sp|P09211|GSTP1_HUMAN Glutathione S-transferase P OS=Homo sapiens (Human) OX=9606 GN=GSTP1 PE=1 SV=2	1	10	10	10	66.2	62.4	54.3	23.356	0	323.31	41391000	38773000	11	3762800	3524800	11996000	9150600	12	11	126	P09211	8	8	8	8	8	8	66.2	66.2	210	210	By MS/MS	By MS/MS	104	84;171;452;453;796;1911;1916;2096;2699;3101	True;True;True;True;True;True;True;True;True;True	90;180;480;481;852;2050;2051;2057;2268;2913;3348	582;583;584;585;586;587;588;589;590;591;592;593;594;595;596;597;1269;1270;1271;1272;1273;1274;1275;1276;1277;3441;3442;3443;3444;3445;3446;3447;3448;3449;3450;3451;3452;3453;3454;3455;3456;3457;3458;3459;3460;3461;3462;3463;3464;3465;3466;6266;6267;6268;6269;6270;6271;6272;6273;6274;6275;6276;6277;6278;6279;6280;6281;6282;18311;18312;18313;18314;18315;18316;18317;18318;18319;18320;18321;18322;183…	623;624;625;626;627;628;629;630;631;632;633;1209;1210;1211;1212;1213;1214;1215;1216;1217;1218;1219;1220;1221;1222;3009;3010;3011;3012;3013;3014;3015;3016;3017;3018;3019;3020;3021;3022;3023;3024;3025;3026;3027;3028;5941;5942;5943;5944;5945;5946;5947;5948;5949;5950;5951;5952;20044;20045;20046;20047;20048;20049;20050;20051;20052;20053;20054;20055;20056;20057;20058;20059;20060;20061;20062;20063;20064…	625;1214;3010;3023;5944;20073;20100;22210;26401;29851	80		20			-1
O00515	Ladinin-1	LAD1	sp|O00515|LAD1_HUMAN Ladinin-1 OS=Homo sapiens (Human) OX=9606 GN=LAD1 PE=1 SV=2	1	23	23	23	49.9	47.6	49.9	57.13	0	112.54	88104000	213880000	31	2842100	6899400	12786000	21206000	15	27	123	O00515	22	23	22	23	22	23	49.9	49.9	517	517	By MS/MS	By MS/MS	51	379;956;991;1036;1279;1379;1388;1719;1729;1792;2009;2048;2049;2226;2238;2297;2343;2465;2496;2521;2696;2697;2751	True;True;True;True;True;True;True;True;True;True;True;True;True;True;True;True;True;True;True;True;True;True;True	397;1016;1056;1104;1368;1369;1474;1483;1838;1848;1913;2171;2218;2219;2403;2415;2478;2530;2659;2660;2692;2722;2910;2911;2967	2888;2889;2890;2891;2892;2893;7511;7512;7513;7514;7515;7516;7517;7518;7519;7769;7770;7771;7772;7773;7774;7775;8080;8081;8082;8083;8084;8085;8086;8087;8088;8089;8090;8091;11666;11667;11668;11669;11670;11671;11672;11673;11674;11675;11676;11677;11678;11679;11680;13310;13311;13312;13313;13314;13315;13316;13317;13318;13319;13320;13321;13322;13391;13392;13393;13394;13395;13396;13397;13398;13399;13400;1…	2587;7423;7424;7425;7426;7427;7428;7648;7871;7872;7873;7874;7875;7876;12557;12558;12559;12560;12561;12562;14815;14816;14817;14818;14819;14820;14821;14822;14823;14824;14825;14876;14877;14878;14879;14880;14881;14882;14883;14884;14885;14886;14887;14888;14889;14890;18395;18508;18509;18917;18918;18919;18920;18921;18922;18923;18924;21553;21554;21555;21556;21557;21558;21559;21560;21561;21562;21865;21866…	2587;7423;7648;7872;12557;14816;14878;18395;18509;18917;21558;21866;21873;23080;23127;23392;23688;24975;25151;25228;26393;26397;26636	51;52		247;354			-1
Q8TF42	Ubiquitin-associated and SH3 domain-containing protein B	UBASH3B	sp|Q8TF42|UBS3B_HUMAN Ubiquitin-associated and SH3 domain-containing protein B OS=Homo sapiens (Human) OX=9606 GN=UBASH3B PE=1 SV=2	1	26	26	26	41	41	37.1	72.695	0	163.83	245560000	242670000	32	7673800	7583500	41987000	29994000	31	24	123	Q8TF42	26	24	26	24	26	24	41	41	649	649	By MS/MS	By MS/MS	304	245;349;362;392;501;546;596;729;730;958;1296;1391;1523;1592;1784;1838;1855;2187;2291;2645;2729;2832;2855;2948;2949;3158	True;True;True;True;True;True;True;True;True;True;True;True;True;True;True;True;True;True;True;True;True;True;True;True;True;True	259;367;380;413;533;583;635;781;782;1019;1386;1487;1628;1700;1905;1961;1978;2361;2471;2854;2944;3059;3083;3185;3186;3408	1932;1933;1934;1935;1936;1937;2679;2680;2681;2682;2683;2684;2685;2686;2687;2688;2689;2690;2691;2803;2804;2805;2806;2807;2808;2975;2976;2977;2978;2979;2980;4019;4020;4021;4022;4023;4384;4385;4386;4387;4388;4389;4390;4391;4900;4901;4902;4903;4904;4905;4906;5790;5791;5792;5793;5794;5795;5796;5797;5798;5799;5800;5801;5802;5803;5804;5805;5806;5807;5808;5809;5810;7523;7524;7525;7526;7527;7528;7529;7530…	1890;1891;2415;2416;2417;2418;2419;2420;2421;2422;2423;2424;2425;2426;2543;2544;2545;2546;2547;2673;3771;4136;4137;4138;4139;4140;4141;4775;4776;4777;4778;5528;5529;5530;5531;5532;5533;5534;5535;5536;5537;5538;5539;5540;5541;5542;7432;7433;7434;7435;7436;7437;7438;7439;7440;13406;13407;13408;13409;13410;14964;14965;16973;16974;16975;17310;18699;18700;18701;18702;18703;18704;18705;18706;19166;1916…	1890;2416;2546;2673;3771;4138;4775;5530;5540;7440;13406;14964;16975;17310;18703;19166;19283;22820;23379;25956;26546;27953;28084;28678;28679;30190	275;276		370;447			-1
Q96CV9	Optineurin	OPTN	sp|Q96CV9|OPTN_HUMAN Optineurin OS=Homo sapiens (Human) OX=9606 GN=OPTN PE=1 SV=3	1	10	10	10	27.2	22.4	22.4	65.921	0	323.31	191660000	233740000	33	5807900	7082900	104590000	99452000	11	14	122	Q96CV9	7	8	7	8	7	8	27.2	27.2	577	577	By MS/MS	By MS/MS	317	48;547;658;668;980;1000;1423;1721;2077;2379	True;True;True;True;True;True;True;True;True;True	50;584;585;700;711;1044;1065;1520;1840;2249;2567	294;295;296;297;298;299;300;301;4392;4393;4394;4395;4396;4397;4398;4399;4400;4401;4402;4403;4404;4405;4406;4407;4408;4409;4410;4411;4412;4413;4414;4415;4416;4417;4418;5286;5287;5288;5289;5290;5291;5292;5293;5294;5295;5296;5297;5298;5390;5391;5392;5393;5394;5395;5396;5397;5398;7703;7704;7705;7706;7707;7708;7816;7817;7818;7819;7820;7821;7822;7823;7824;7825;7826;7827;14213;14214;14215;14216;14217;14…	174;175;176;177;178;179;180;181;4142;4143;4144;4145;4146;4147;4148;4149;4150;4151;4152;4153;4154;4155;4156;4157;4158;4159;4160;4161;4162;4163;4164;4165;4166;4167;4168;4169;4170;4171;4172;4173;4174;4175;4176;4177;5057;5058;5059;5060;5061;5062;5063;5064;5065;5066;5067;5068;5069;5070;5071;5072;5073;5074;5223;5224;5225;5226;5227;5228;5229;5230;7597;7598;7599;7668;7669;7670;7671;7672;16146;16147;16148…	175;4160;5074;5223;7597;7668;16148;18398;21988;23847	278		44			-1
Q9BW27	Nuclear pore complex protein Nup85	NUP85	sp|Q9BW27|NUP85_HUMAN Nuclear pore complex protein Nup85 OS=Homo sapiens (Human) OX=9606 GN=NUP85 PE=1 SV=1	1	16	16	16	26.8	26.8	26.8	75.019	0	140.2	95595000	112900000	31	3083700	3642000	17403000	15944000	16	18	119	Q9BW27	16	16	16	16	16	16	26.8	26.8	656	656	By MS/MS	By MS/MS	343	37;132;330;350;489;514;1148;1278;1378;1426;1883;2288;2289;2382;2991;3117	True;True;True;True;True;True;True;True;True;True;True;True;True;True;True;True	38;139;348;368;521;548;1221;1367;1473;1524;2012;2468;2469;2570;3231;3364	229;230;231;232;233;234;235;978;979;980;981;982;983;984;985;986;987;988;989;990;991;992;993;994;995;2568;2569;2570;2571;2572;2573;2574;2575;2576;2692;2693;2694;2695;2696;2697;2698;2699;3918;3919;3920;3921;3922;3923;3924;3925;3926;4112;4113;4114;4115;4116;4117;4118;4119;4120;8917;8918;8919;8920;8921;8922;8923;8924;8925;11657;11658;11659;11660;11661;11662;11663;11664;11665;13294;13295;13296;13297;1…	143;980;981;982;983;984;985;986;987;988;989;990;991;992;993;994;2344;2427;2428;2429;2430;2431;2432;2433;2434;2435;3674;3675;3676;3677;3678;3679;3680;3681;3682;3683;3850;3851;3852;3853;3854;3855;3856;3857;3858;8652;8653;8654;8655;8656;8657;8658;8659;8660;12549;12550;12551;12552;12553;12554;12555;12556;14805;14806;14807;14808;14809;14810;14811;14812;14813;14814;16171;16172;16173;16174;16175;16176;1…	143;982;2344;2430;3680;3858;8657;12555;14806;16178;19579;23363;23373;23863;29071;29964	300;301;302;303		1;47;113;116			-1
P08240	Signal recognition particle receptor subunit alpha	SRPR	sp|P08240|SRPRA_HUMAN Signal recognition particle receptor subunit alpha OS=Homo sapiens (Human) OX=9606 GN=SRPRA PE=1 SV=2	1	20	20	20	35	30.4	28.5	69.81	0	97.136	85568000	91729000	35	2444800	2620800	16149000	12424000	13	12	117	P08240	17	17	17	17	17	17	35	35	638	638	By MS/MS	By MS/MS	103	98;138;351;544;581;896;1260;1383;1625;1783;1908;1918;2033;2066;2108;2271;2412;2486;2940;3034	True;True;True;True;True;True;True;True;True;True;True;True;True;True;True;True;True;True;True;True	105;145;369;581;619;956;1344;1478;1734;1904;2044;2059;2060;2200;2237;2281;2450;2601;2682;3174;3175;3277	747;748;749;750;751;752;753;754;1028;1029;1030;1031;1032;1033;1034;1035;2700;2701;2702;2703;2704;2705;2706;4371;4372;4373;4374;4375;4801;4802;4803;4804;4805;4806;4807;4808;4809;7091;7092;7093;7094;7095;7096;7097;7098;7099;7100;7101;7102;7103;7104;7105;7106;11461;11462;11463;11464;11465;11466;11467;11468;11469;13342;13343;13344;13345;13346;13347;13348;13349;13350;15761;15762;15763;15764;15765;1576…	806;807;808;809;810;1011;1012;2436;2437;2438;2439;2440;4132;4683;4684;4685;4686;4687;7194;7195;7196;7197;7198;7199;7200;7201;7202;7203;12261;12262;12263;12264;12265;12266;12267;12268;12269;12270;14837;14838;14839;14840;14841;14842;14843;14844;17484;18697;18698;19984;19985;19986;19987;19988;19989;20103;20104;20105;20106;20107;20108;20109;20110;20111;21725;21726;21727;21728;21729;21730;21731;21732;…	807;1012;2437;4132;4686;7202;12262;14841;17484;18697;19989;20111;21727;21935;22298;23329;24003;25121;28619;29318	75;76;77;78;79		1;375;503;525;532			-1
O00567	Nucleolar protein 56	NOP56	sp|O00567|NOP56_HUMAN Nucleolar protein 56 OS=Homo sapiens (Human) OX=9606 GN=NOP56 PE=1 SV=4	1	20	20	20	32.2	25.1	30.8	66.049	0	119.1	57986000	201320000	31	1870500	6494100	12323000	29718000	13	25	107	O00567	17	19	17	19	17	19	32.2	32.2	594	594	By MS/MS	By MS/MS	53	524;560;634;961;1147;1221;1465;1519;1566;1612;1622;1671;1672;1789;1790;2156;2197;2579;3032;3127	True;True;True;True;True;True;True;True;True;True;True;True;True;True;True;True;True;True;True;True	558;559;598;674;1022;1220;1298;1566;1624;1673;1721;1731;1782;1783;1910;1911;2330;2371;2785;3275;3375	4185;4186;4187;4188;4189;4190;4191;4192;4193;4194;4195;4196;4197;4198;4199;4200;4511;4512;4513;4514;4515;4516;4517;4518;4519;4520;4521;4522;4523;4524;5137;5138;5139;5140;5141;5142;5143;5144;7545;7546;7547;7548;7549;7550;7551;8908;8909;8910;8911;8912;8913;8914;8915;8916;10020;10021;10022;10023;10024;10025;10026;10027;14590;14591;14592;15012;15379;15380;15381;15382;15383;15384;15385;15386;15672;156…	3931;3932;4251;4252;4253;4254;4255;4256;4257;4258;4966;4967;4968;7449;7450;7451;7452;7453;8642;8643;8644;8645;8646;8647;8648;8649;8650;8651;10378;10379;10380;10381;10382;10383;10384;16583;16966;17223;17407;17456;17457;17458;17459;17460;17461;17462;17463;17464;17465;17466;17467;17468;17469;17470;17471;17818;17819;17820;17821;17822;17823;17824;17825;17826;17827;17828;18722;18723;18724;18725;18726;1…	3932;4258;4966;7453;8642;10384;16583;16966;17223;17407;17458;17818;17828;18726;18730;22756;22859;25571;29304;30017	53;54;55		236;425;496			-1
Q03252	Lamin-B2	LMNB2	sp|Q03252|LMNB2_HUMAN Lamin-B2 OS=Homo sapiens (Human) OX=9606 GN=LMNB2 PE=1 SV=4	1	32	32	30	46.6	44.8	46.6	69.948	0	161.97	113280000	322090000	37	3061500	8705000	10691000	21459000	20	40	107	Q03252	27	32	27	32	26	30	46.6	43.7	620	620	By MS/MS	By MS/MS	192	104;148;149;188;189;287;342;343;568;615;616;940;995;1303;1504;1505;1571;1583;1648;1746;1774;1802;1835;1866;1877;2019;2221;2321;2383;2583;2793;2911	True;True;True;True;True;True;True;True;True;True;True;True;True;True;True;True;True;True;True;True;True;True;True;True;True;True;True;True;True;True;True;True	111;155;156;197;198;302;360;361;606;655;656;1000;1060;1393;1607;1608;1678;1690;1759;1866;1895;1923;1958;1991;2004;2186;2398;2506;2571;2789;3016;3017;3143	780;781;782;1118;1119;1120;1121;1122;1123;1124;1125;1126;1127;1128;1129;1130;1131;1132;1133;1516;1517;1518;1519;1520;1521;1522;1523;1524;1525;1526;2268;2269;2270;2271;2272;2273;2274;2275;2276;2642;2643;2644;2645;4738;4739;4740;4741;4742;4743;4744;5041;5042;5043;5044;7418;7419;7420;7421;7422;7423;7424;7425;7426;7794;7795;7796;7797;7798;7799;7800;7801;7802;12210;12211;12212;12213;12214;12215;12216;…	829;830;831;832;1121;1122;1123;1124;1125;1126;1505;1506;1507;1508;1509;2147;2148;2149;2150;2151;2152;2153;2154;2155;2156;2157;2383;2384;4633;4634;4635;4636;4637;4907;4908;7393;7394;7395;7396;7397;7398;7654;7655;7656;7657;13427;13428;13429;13430;13431;13432;13433;13434;16871;16872;17240;17241;17242;17283;17284;17285;17286;17725;18574;18575;18655;18960;19148;19506;19507;19551;21695;21696;21697;2301…	829;1122;1125;1505;1507;2147;2383;2384;4633;4907;4908;7394;7655;13434;16871;16872;17240;17285;17725;18574;18655;18960;19148;19506;19551;21695;23012;23523;23866;25606;26993;28377	210;211		386;574			-1
Q9UHD8	Septin-9	2009-09-01	sp|Q9UHD8|SEPT9_HUMAN Septin-9 OS=Homo sapiens (Human) OX=9606 GN=SEPTIN9 PE=1 SV=2	1	16	16	16	27	27	27	65.401	0	64.932	78253000	110510000	42	1863200	2631300	11841000	12592000	14	16	107	Q9UHD8	16	16	16	16	16	16	27	27	586	586	By MS/MS	By MS/MS	386	51;1127;1466;1576;2218;2311;2312;2319;2446;2577;2589;2672;2737;2951;3029;3118	True;True;True;True;True;True;True;True;True;True;True;True;True;True;True;True	53;1199;1567;1683;2395;2496;2497;2504;2637;2782;2795;2882;2952;3189;3272;3365	311;312;313;314;315;316;317;318;319;8676;8677;8678;8679;8680;8681;8682;8683;14593;14594;14595;14596;14597;14598;14599;14600;14601;14602;14603;14604;14605;14606;14607;14608;14609;14610;15441;15442;15443;15444;15445;15446;15447;15448;21431;21432;21433;21434;21435;21436;21437;21438;21439;22056;22057;22058;22059;22060;22061;22062;22063;22064;22065;22066;22067;22068;22069;22070;22071;22072;22073;22074…	185;186;187;188;189;190;191;192;193;8267;16584;16585;16586;16587;16588;16589;16590;16591;16592;16593;17262;17263;17264;17265;17266;17267;17268;17269;22980;22981;22982;22983;22984;22985;22986;22987;23474;23475;23476;23477;23478;23479;23480;23481;23482;23483;23484;23485;23486;23487;23488;23489;23490;23491;23514;23515;23516;24523;24524;24525;24526;24527;24528;24529;24530;24531;25546;25547;25548;2554…	189;8267;16589;17265;22982;23484;23491;23514;24531;25549;25640;26212;26565;28696;29287;29972						-1
Q9H2D6	TRIO and F-actin-binding protein	TRIOBP	sp|Q9H2D6|TARA_HUMAN TRIO and F-actin-binding protein OS=Homo sapiens (Human) OX=9606 GN=TRIOBP PE=1 SV=3	2	32	32	32	13.4	4.2	6.5	261.37	0	197.24	9129200	16809000	109	83754	154210	1360600	1123600	1	0	104	Q9H2D6;Q6WCQ1	10	13	10	13	10	13	13.4	13.4	2365	2365;1025	By MS/MS	By matching	353	108;312;331;341;365;591;638;942;1129;1449;1471;1752;1785;1786;2075;2079;2107;2144;2251;2254;2325;2358;2464;2482;2525;2739;2740;2799;2956;3054;3060;3136	True;True;True;True;True;True;True;True;True;True;True;True;True;True;True;True;True;True;True;True;True;True;True;True;True;True;True;True;True;True;True;True	115;330;349;359;383;630;678;1002;1201;1550;1572;1872;1906;1907;2247;2251;2280;2318;2429;2432;2511;2546;2657;2658;2678;2726;2954;2955;3023;3195;3299;3305;3385	809;810;811;812;813;2466;2467;2468;2469;2577;2578;2579;2638;2639;2640;2641;2821;2822;2823;2824;4871;4872;4873;4874;4875;4876;4877;5178;5179;5180;5181;5182;5183;5184;5185;5186;7430;7431;7432;7433;7434;7435;8689;8690;14495;14496;14497;14498;14499;14626;14627;14628;14629;14630;14631;14632;16959;16960;16961;16962;16963;17180;17181;17182;17183;17184;17185;17186;17187;17188;17189;17190;17191;17192;1719…	842;843;844;845;2284;2285;2345;2381;2382;2552;2553;4753;4754;4755;4999;5000;5001;5002;5003;5004;7400;7401;7402;8273;16519;16520;16521;16522;16602;16603;16604;16605;16606;18585;18586;18587;18707;18708;18709;18710;18711;18712;18713;18714;18715;18716;18717;21976;22011;22294;22295;22296;22444;22445;22446;22447;23198;23199;23200;23213;23214;23215;23216;23217;23218;23563;23564;23565;23566;23567;23748;2…	843;2285;2345;2381;2553;4753;5002;7402;8273;16522;16605;18586;18710;18713;21976;22011;22294;22446;23200;23216;23563;23751;24971;25109;25260;26571;26573;27372;28720;29624;29636;30100	314;315		2118;2126			-1;-1
P02768	Serum albumin	ALB	sp|P02768|ALBU_HUMAN Serum albumin OS=Homo sapiens GN=ALB PE=1 SV=2	2	29	25	25	47.3	11.7	23.2	69.366	0	105.95	159190000	321740000	36	4421900	8937200	88064000	131970000	8	11	96	P02768;CON__sp|P02768|ALBU_HUMAN	8	14	6	12	6	12	42.2	42.2	609	609;609	By MS/MS	By MS/MS	21	11;39;59;302;317;319;374;537;708;799;1105;1459;1478;1641;1830;1843;2122;2172;2208;2258;2274;2475;2627;2862;2893;2894;2958;3097;3122	True;True;True;True;True;False;True;True;True;True;True;True;False;True;True;True;True;True;True;True;True;True;True;True;True;True;False;True;False	12;40;63;319;320;335;337;392;572;758;855;1175;1560;1580;1752;1953;1966;2296;2346;2383;2437;2453;2671;2834;3090;3122;3123;3197;3344;3369	78;79;245;402;2410;2411;2412;2413;2414;2518;2522;2523;2872;4289;4290;4291;4292;4293;5678;6293;6294;6295;6296;6297;6298;8506;8507;8508;8509;8510;8511;8512;8513;8514;8515;8516;8517;8518;8519;8520;8521;14544;14545;14546;14547;14548;14549;14550;14551;14552;14553;14554;14555;14556;14557;14558;14559;14560;14561;14668;14669;14670;14671;14672;14673;14674;14675;14676;14677;14678;14679;14680;14681;15889;15…	54;146;471;2249;2250;2251;2323;2325;2326;2582;4033;4034;4035;4036;5454;5956;8171;8172;8173;8174;8175;8176;8177;8178;8179;8180;8181;8182;16546;16547;16548;16549;16550;16551;16552;16553;16554;16555;16556;16557;16558;16559;16560;16561;16562;16563;16564;16565;16566;16567;16568;16644;16645;16646;17553;17554;19142;19184;22344;22780;22933;22934;22935;22936;22937;22938;22939;23235;23236;23237;23238;23239…	54;146;471;2250;2323;2326;2582;4034;5454;5956;8172;16549;16645;17553;19142;19184;22344;22780;22938;23240;23334;25041;25889;28101;28283;28284;28722;29836;29990	10;11		111;572		+	-1;-1
Q9H0L4	Cleavage stimulation factor subunit 2 tau variant	CSTF2T	sp|Q9H0L4|CSTFT_HUMAN Cleavage stimulation factor subunit 2 tau variant OS=Homo sapiens (Human) OX=9606 GN=CSTF2T PE=1 SV=1	1	20	20	16	46.6	6.3	5.2	64.436	0	158.19	1240000	1893400	28	44286	67620	76414	96744	0	0	91	Q9H0L4	3	3	3	3	3	1	46.6	38.3	616	616	By matching	By matching	351	176;193;290;906;950;984;987;990;997;1046;1209;1264;1410;1542;1670;2135;2252;2471;2536;2557	True;True;True;True;True;True;True;True;True;True;True;True;True;True;True;True;True;True;True;True	185;202;203;306;307;966;1010;1048;1051;1055;1062;1114;1115;1284;1349;1507;1647;1781;2309;2430;2667;2738;2761;2762	1436;1437;1438;1439;1440;1441;1442;1443;1444;1549;1550;1551;1552;1553;1554;2311;2312;2313;2314;2315;2316;2317;2318;2319;2320;7184;7185;7186;7187;7188;7189;7190;7480;7481;7482;7483;7730;7731;7732;7733;7734;7735;7748;7749;7750;7765;7766;7767;7768;7807;7808;7809;8145;8146;8147;8148;8149;8150;8151;8152;8153;8154;8155;8156;8157;8158;8159;8160;8161;8162;8163;8164;8165;8166;8167;8168;8169;8170;8171;8172…	1444;1445;1446;1447;1523;1524;1525;1526;1527;1528;1529;1530;2174;2175;2176;2177;2178;2179;7263;7264;7265;7266;7415;7618;7619;7620;7625;7626;7641;7642;7643;7644;7645;7646;7647;7662;7663;7904;7905;7906;7907;7908;7909;7910;7911;7912;7913;7914;7915;7916;7917;7918;7919;7920;7921;7922;9978;9979;12285;12286;12287;12288;15226;15227;15228;15229;15230;15231;15232;17087;17088;17089;17090;17091;17092;17093;1…	1445;1530;2174;7264;7415;7619;7625;7646;7663;7918;9978;12286;15227;17093;17817;22395;23201;25029;25299;25457	144;145;307;308;309;310;311;312		11;140;144;364;423;438;443;471			-1
Q13137	Calcium-binding and coiled-coil domain-containing protein 2	CALCOCO2	sp|Q13137|CACO2_HUMAN Calcium-binding and coiled-coil domain-containing protein 2 OS=Homo sapiens (Human) OX=9606 GN=CALCOCO2 PE=1 SV=1	1	7	7	7	31.2	27.4	31.2	52.253	0	190.04	47050000	57350000	27	1742600	2124100	39397000	36347000	7	14	90	Q13137	6	7	6	7	6	7	31.2	31.2	446	446	By MS/MS	By MS/MS	212	38;368;506;846;1692;2176;2177	True;True;True;True;True;True;True	39;386;540;904;1806;1807;2350;2351	236;237;238;239;240;241;242;243;244;2833;2834;2835;2836;2837;2838;2839;4056;4057;4058;4059;4060;4061;4062;4063;4064;6628;6629;6630;6631;6632;6633;6634;6635;6636;6637;6638;6639;6640;6641;6642;6643;6644;6645;6646;6647;6648;6649;6650;6651;6652;16288;16289;16290;16291;16292;16293;16294;16295;16296;16297;16298;16299;16300;16301;16302;16303;16304;16305;16306;16307;16308;16309;16310;16311;16312;21152;21…	144;145;2559;2560;2561;3804;3805;3806;3807;3808;3809;3810;3811;3812;3813;6620;6621;6622;6623;6624;6625;6626;6627;6628;6629;6630;6631;6632;6633;6634;6635;6636;6637;6638;6639;6640;6641;6642;6643;6644;6645;6646;6647;6648;6649;6650;6651;6652;6653;6654;6655;6656;6657;6658;6659;17965;17966;17967;17968;17969;17970;17971;17972;17973;17974;17975;17976;17977;17978;17979;17980;17981;17982;17983;17984;17985;…	144;2560;3809;6624;17988;22788;22789	226		349			-1
Q13573	SNW domain-containing protein 1	SNW1	sp|Q13573|SNW1_HUMAN SNW domain-containing protein 1 OS=Homo sapiens (Human) OX=9606 GN=SNW1 PE=1 SV=1	1	25	25	25	48.3	3.9	10.8	61.494	0	186.86	765160	7504200	25	30606	300170	63528	401140	0	1	89	Q13573	2	6	2	6	2	6	48.3	48.3	536	536	By MS/MS	By MS/MS	215	7;183;411;419;437;575;576;679;717;830;892;959;999;1053;1493;1494;1512;1922;1932;1997;2248;2284;2678;2763;2810	True;True;True;True;True;True;True;True;True;True;True;True;True;True;True;True;True;True;True;True;True;True;True;True;True	8;192;436;444;462;463;613;614;723;767;768;887;952;1020;1064;1122;1595;1596;1617;2065;2079;2157;2158;2425;2463;2889;2979;3035	52;53;54;1490;1491;3152;3153;3154;3213;3214;3215;3216;3217;3218;3292;3293;3294;3295;3296;3297;3298;3299;3300;4775;4776;4777;4778;4779;5464;5465;5466;5467;5725;5726;5727;5728;5729;5730;5731;6511;6512;6513;6514;6515;6516;6517;6518;7069;7070;7071;7532;7533;7534;7535;7536;7537;7538;7539;7540;7541;7813;7814;7815;8224;8225;14786;14787;14788;14789;14790;14791;14792;14793;14794;14795;14796;14797;14798;14…	44;45;46;1485;2797;2798;2799;2800;2801;2833;2887;2888;2889;2890;2891;2892;2893;4658;4659;5263;5264;5265;5482;5483;5484;5485;5486;6553;6554;6555;6556;6557;6558;7183;7441;7442;7443;7444;7445;7446;7665;7666;7667;7962;16733;16734;16735;16736;16737;16738;16739;16740;16741;16742;16933;16934;20125;20126;20166;20167;21506;21507;21508;21509;21510;23175;23176;23177;23178;23179;23180;23181;23354;26275;26276…	44;1485;2797;2833;2888;4658;4659;5265;5482;6555;7183;7442;7665;7962;16733;16742;16933;20125;20167;21509;23175;23354;26284;26667;27436	227;228;229;230;231;232		125;199;202;207;443;458			-1
Q9Y2R4	Probable ATP-dependent RNA helicase DDX52	DDX52	sp|Q9Y2R4|DDX52_HUMAN Probable ATP-dependent RNA helicase DDX52 OS=Homo sapiens (Human) OX=9606 GN=DDX52 PE=1 SV=3	1	13	13	13	26.7	24.7	22	67.497	0	169.75	54189000	98985000	28	1935300	3535200	16388000	21869000	8	15	87	Q9Y2R4	12	11	12	11	12	11	26.7	26.7	599	599	By MS/MS	By MS/MS	397	130;443;451;628;743;1208;1302;1382;1392;1397;1482;1881;2582	True;True;True;True;True;True;True;True;True;True;True;True;True	137;471;479;668;796;1283;1392;1477;1488;1494;1584;2009;2010;2788	962;963;964;965;966;967;968;969;970;971;972;973;974;975;976;3379;3380;3381;3382;3383;3384;3385;3386;3387;3423;3424;3425;3426;3427;3428;3429;3430;3431;3432;3433;3434;3435;3436;3437;3438;3439;3440;5111;5907;5908;5909;5910;5911;5912;5913;5914;5915;9749;9750;9751;9752;9753;9754;9755;12201;12202;12203;12204;12205;12206;12207;12208;12209;13333;13334;13335;13336;13337;13338;13339;13340;13341;13457;13458…	966;967;968;969;970;971;972;973;974;975;976;977;978;2970;2971;2972;2973;2974;2975;2998;2999;3000;3001;3002;3003;3004;3005;3006;3007;3008;4950;5621;5622;5623;9974;9975;9976;9977;13425;13426;14833;14834;14835;14836;14966;14967;14968;14969;14970;14971;14972;14973;14974;14975;14976;14977;14978;14979;14980;14981;14982;14983;14984;14985;15056;15057;16672;16673;19560;19561;19562;19563;19564;19565;19566;…	975;2972;2999;4950;5622;9976;13425;14835;14968;15056;16672;19567;25603	350		1			-1
P08515	Glutathione S-transferase class-mu 26 kDa isozyme		sp|P08515|GST26_SCHJA Glutathione S-transferase class-mu 26 kDa isozyme OS=Schistosoma japonicum PE=1 SV=3	1	6	6	6	41.7	36.2	36.2	25.498	0	79.625	25290000	31053000	10	2529000	3105300	13246000	12999000	7	10	86	CON__sp|P08515|GST26_SCHJA	5	4	5	4	5	4	41.7	41.7	218	218	By MS/MS	By MS/MS	26	384;678;1394;1673;1674;3095	True;True;True;True;True;True	403;721;722;1490;1784;1785;3342	2911;2912;2913;2914;2915;5448;5449;5450;5451;5452;5453;5454;5455;5456;5457;5458;5459;5460;5461;5462;5463;13483;13484;13485;13486;13487;13488;13489;13490;13491;13492;13493;13494;13495;13496;13497;13498;13499;16140;16141;16142;16143;16144;16145;16146;16147;16148;16149;16150;16151;16152;16153;16154;16155;16156;16157;16158;16159;16160;16161;16162;16163;16164;16165;16166;16167;16168;16169;16170;16171;…	2599;2600;2601;5251;5252;5253;5254;5255;5256;5257;5258;5259;5260;5261;5262;14992;14993;14994;14995;14996;14997;14998;14999;15000;15001;15002;15003;15004;15005;15006;15007;15008;15009;15010;15011;17829;17830;17831;17832;17833;17834;17835;17836;17837;17838;17839;17840;17841;17842;17843;17844;17845;17846;17847;17848;17849;17850;17851;17852;17853;17854;17855;17856;17857;17858;29811;29812;29813;29814;…	2600;5262;14994;17830;17851;29831	21		94		+	-1
Q15149	Plectin	PLEC	sp|Q15149|PLEC_HUMAN Plectin OS=Homo sapiens (Human) OX=9606 GN=PLEC PE=1 SV=3	1	34	34	34	7.9	7	7.9	531.78	0	145	78411000	313450000	290	270380	1080900	15450000	42119000	12	49	85	Q15149	30	34	30	34	30	34	7.9	7.9	4684	4684	By MS/MS	By MS/MS	230	78;221;306;327;328;370;782;795;941;964;1039;1055;1091;1095;1229;1633;1634;1657;1665;1762;1812;1813;1816;1894;1919;2010;2231;2327;2495;2506;2567;2989;3022;3071	True;True;True;True;True;True;True;True;True;True;True;True;True;True;True;True;True;True;True;True;True;True;True;True;True;True;True;True;True;True;True;True;True;True	84;235;324;345;346;388;836;851;1001;1025;1107;1124;1160;1165;1306;1743;1744;1745;1768;1776;1882;1934;1935;1936;1939;2025;2061;2172;2408;2514;2691;2706;2772;3229;3263;3264;3317	549;550;551;552;553;554;555;556;557;1778;2427;2428;2429;2430;2431;2432;2433;2434;2556;2557;2558;2559;2560;2561;2846;2847;6161;6162;6163;6164;6165;6259;6260;6261;6262;6263;6264;6265;7427;7428;7429;7557;8110;8111;8230;8231;8232;8233;8234;8235;8236;8237;8424;8425;8439;8440;8441;8442;10118;10119;15834;15835;15836;15837;15838;15839;15840;15841;15842;15843;15844;15845;15846;15847;15848;15849;15850;1585…	605;1757;2258;2259;2260;2261;2262;2341;2342;2568;5837;5838;5939;5940;7399;7456;7888;7889;7966;7967;7968;8129;8137;10462;17524;17525;17526;17527;17528;17529;17530;17531;17532;17533;17534;17535;17778;17779;17780;17781;17782;17783;17784;17785;17805;18621;19103;19104;19105;19109;19626;19627;20112;20113;20114;20115;20116;20117;21563;21564;21565;21566;21567;21568;21569;21570;21571;23099;23100;23101;235…	605;1757;2259;2341;2342;2568;5838;5939;7399;7456;7889;7966;8129;8137;10462;17524;17535;17782;17805;18621;19104;19105;19109;19626;20112;21568;23099;23585;25150;25184;25483;29067;29266;29673	242;243;244;245;246;247;248		4166;4213;4289;4435;4482;4505;4591			-1
Q8N442	Translation factor GUF1, mitochondrial	GUF1	sp|Q8N442|GUF1_HUMAN Translation factor GUF1, mitochondrial OS=Homo sapiens (Human) OX=9606 GN=GUF1 PE=1 SV=1	1	13	13	13	23	23	23	74.327	0	54.199	59645000	78191000	35	1704100	2234000	12372000	12212000	12	15	84	Q8N442	13	13	13	13	13	13	23	23	669	669	By MS/MS	By MS/MS	293	186;241;467;603;607;857;1033;1820;1859;1964;2014;2806;2863	True;True;True;True;True;True;True;True;True;True;True;True;True	195;255;495;643;647;916;1101;1943;1982;1983;2120;2177;2178;3030;3091	1502;1503;1504;1505;1506;1507;1508;1509;1510;1903;1904;1905;1906;1907;1908;1909;1910;1911;3717;3718;3719;3720;3721;3722;3723;3724;4956;4957;4958;4959;4960;4961;4962;4963;4964;4982;4983;4984;4985;4986;4987;4988;4989;4990;6711;6712;6713;6714;6715;6716;6717;6718;8060;8061;8062;8063;8064;8065;8066;8067;8068;17517;17518;17519;17520;17521;17522;17523;17524;17525;17526;17527;17528;17529;17530;17531;1753…	1489;1490;1491;1492;1493;1494;1495;1496;1497;1498;1499;1852;1853;1854;1855;1856;3437;3438;3439;3440;3441;3442;4830;4831;4832;4866;4867;4868;6715;6716;6717;6718;6719;6720;6721;6722;7841;7842;7843;7844;7845;19118;19119;19120;19121;19122;19123;19124;19125;19126;19127;19128;19291;19292;19293;19294;19295;19296;21260;21261;21262;21263;21264;21265;21266;21267;21268;21608;21609;21610;27413;27414;27415;27…	1489;1852;3439;4830;4866;6718;7844;19119;19291;21262;21609;27416;28111	268		325			-1
Q9UKF6	Cleavage and polyadenylation specificity factor subunit 3	CPSF3	sp|Q9UKF6|CPSF3_HUMAN Cleavage and polyadenylation specificity factor subunit 3 OS=Homo sapiens (Human) OX=9606 GN=CPSF3 PE=1 SV=1	1	20	20	20	40.6	1.5	4.2	77.485	0	206.15	244080	1390300	35	6973.7	39721	42296	29016	0	0	83	Q9UKF6	1	3	1	3	1	3	40.6	40.6	684	684	By matching	By MS/MS	390	160;621;723;740;948;1093;1099;1424;1451;1818;1860;2060;2151;2211;2337;2356;2502;2615;2650;2939	True;True;True;True;True;True;True;True;True;True;True;True;True;True;True;True;True;True;True;True	167;168;661;774;792;1008;1162;1163;1169;1521;1522;1552;1941;1984;2230;2325;2387;2524;2544;2698;2699;2822;2859;3172;3173	1181;1182;1183;1184;1185;1186;1187;1188;1189;5069;5070;5071;5072;5073;5074;5075;5751;5752;5753;5754;5755;5756;5884;5885;5886;5887;5888;5889;5890;5891;7467;7468;7469;7470;7471;7472;7473;7474;7475;8433;8434;8435;8436;8437;8458;8459;8460;14231;14232;14233;14234;14235;14236;14237;14238;14239;14240;14506;14507;14508;17500;17501;17502;17503;17504;17505;17506;17507;17508;17509;17743;17744;17745;17746;20…	1155;1156;1157;1158;1159;1160;1161;1162;4930;4931;4932;4933;4934;4935;5500;5501;5502;5503;5504;5505;5608;5609;5610;5611;7412;8132;8133;8134;8135;8144;16157;16158;16159;16160;16161;16162;16163;16164;16165;16166;16167;16527;16528;16529;19111;19112;19113;19114;19115;19116;19297;19298;19299;21916;21917;21918;21919;21920;22509;22510;22511;22954;22955;23653;23654;23655;23656;23746;25163;25164;25165;251…	1157;4933;5500;5611;7412;8134;8144;16164;16527;19115;19297;21917;22509;22955;23654;23746;25163;25827;25976;28605	330;331;332;333;334;335;336;337;338;339;340		95;189;314;326;331;332;368;377;424;467;607			-1
O43167	Zinc finger and BTB domain-containing protein 24	ZBTB24	sp|O43167|ZBT24_HUMAN Zinc finger and BTB domain-containing protein 24 OS=Homo sapiens (Human) OX=9606 GN=ZBTB24 PE=1 SV=2	3	15	15	15	21.5	20.4	20.4	78.281	0	84.799	31068000	43209000	28	1109600	1543200	10396000	10479000	13	15	78	O43167;Q9NSC2;Q9BXA9	14	14	14	14	14	14	21.5	21.5	697	697;1324;1300	By MS/MS	By MS/MS	60	609;859;1057;1058;1115;1116;1475;1836;1837;2392;2431;2559;2571;2676;2895	True;True;True;True;True;True;True;True;True;True;True;True;True;True;True	649;918;1126;1127;1186;1187;1577;1959;1960;2580;2620;2764;2776;2886;3124	4994;4995;4996;4997;4998;4999;6721;6722;6723;6724;6725;6726;8244;8245;8246;8247;8248;8249;8250;8251;8252;8253;8254;8255;8256;8591;8592;8593;8594;8595;8596;8597;14644;14645;14646;14647;14648;14649;17599;17600;17601;17602;17603;17604;17605;17606;17607;17608;17609;17610;17611;17612;17613;17614;17615;22653;22654;22655;22656;22657;22658;22900;22901;22902;22903;22904;22905;24062;24063;24064;24065;24066…	4871;4872;4873;4874;6724;6725;6726;6727;6728;6729;7972;7973;7974;7975;7976;7977;7978;7979;7980;8223;8224;8225;8226;8227;8228;16612;16613;16614;16615;16616;16617;19149;19150;19151;19152;19153;19154;19155;19156;19157;19158;19159;19160;19161;19162;19163;19164;19165;23922;24117;24118;24119;24120;24121;24122;25462;25463;25464;25465;25466;25467;25517;25518;25519;25520;26249;26250;26251;26252;26253;2625…	4871;6729;7973;7978;8225;8228;16615;19152;19162;23922;24121;25463;25517;26254;28288	60		369			-1;-1;-1
P20700	Lamin-B1	LMNB1	sp|P20700|LMNB1_HUMAN Lamin-B1 OS=Homo sapiens (Human) OX=9606 GN=LMNB1 PE=1 SV=2	1	24	22	22	34.8	33.1	34.8	66.408	0	103.14	75746000	131450000	35	2164200	3755800	12630000	18474000	14	22	76	P20700	23	23	22	21	22	21	31.7	31.7	586	586	By MS/MS	By MS/MS	132	64;190;191;274;329;344;352;1184;1286;1408;1454;1506;1507;1513;1514;1648;1746;1777;1803;1834;1865;2037;2051;2157	True;True;True;True;True;True;True;True;True;True;True;True;True;True;True;False;False;True;True;True;True;True;True;True	69;199;200;288;347;362;370;1259;1376;1505;1555;1609;1610;1618;1619;1759;1866;1898;1924;1925;1957;1990;2204;2221;2331	440;441;442;443;444;445;1527;1528;1529;1530;1531;1532;1533;1534;1535;1536;1537;1538;1539;1540;1541;1542;2170;2171;2172;2562;2563;2564;2565;2566;2567;2646;2647;2648;2649;2650;2651;2652;2707;2708;2709;2710;2711;2712;2713;2714;2715;2716;2717;2718;2719;2720;9573;9574;9575;9576;9577;9578;9579;12095;12096;12097;12098;12099;12100;12101;12102;12103;13658;13659;13660;13661;13662;13663;13664;13665;13666;14…	527;1510;1511;1512;1513;1514;1515;1516;1517;1518;1519;1520;1521;2072;2073;2343;2385;2386;2441;2442;2443;2444;2445;2446;2447;2448;2449;2450;9822;9823;13332;13333;13334;13335;13336;13337;13338;13339;13340;15222;15223;15224;16532;16873;16874;16935;16936;16937;16938;17725;18574;18575;18659;18660;18661;18961;18962;18963;18964;18965;18966;18967;18968;18969;18970;19147;19501;19502;19503;19504;19505;2174…	527;1510;1516;2072;2343;2385;2449;9822;13336;15223;16532;16873;16874;16936;16938;17725;18574;18660;18968;19147;19502;21743;21886;22757	126;127		249;281			-1
P12956	X-ray repair cross-complementing protein 6	XRCC6	sp|P12956|XRCC6_HUMAN X-ray repair cross-complementing protein 6 OS=Homo sapiens (Human) OX=9606 GN=XRCC6 PE=1 SV=2	1	22	22	22	41.4	24.5	30.9	69.842	0	169.48	16381000	40622000	32	511900	1269400	3616200	4722800	3	6	74	P12956	11	14	11	14	11	14	41.4	41.4	609	609	By MS/MS	By MS/MS	118	408;464;471;648;742;1230;1250;1251;1263;1267;1440;1447;1604;1983;2150;2261;2371;2639;2651;2652;2859;2860	True;True;True;True;True;True;True;True;True;True;True;True;True;True;True;True;True;True;True;True;True;True	433;492;499;500;688;795;1307;1333;1334;1347;1348;1354;1355;1539;1548;1713;2142;2324;2440;2559;2846;2860;2861;3087;3088	3134;3135;3136;3687;3688;3689;3690;3691;3692;3693;3694;3753;3754;3755;3756;3757;3758;3759;3760;3761;3762;3763;3764;5224;5225;5226;5227;5228;5229;5230;5906;10120;10121;10122;10123;10124;11421;11422;11423;11424;11425;11426;11427;11428;11429;11430;11481;11482;11483;11484;11485;11486;11487;11488;11489;11490;11586;11587;11588;11589;11590;11591;11592;11593;11594;11595;14440;14441;14442;14443;14444;1444…	2776;3418;3419;3420;3421;3472;3473;3474;3475;3476;3477;5028;5620;10463;10464;12235;12236;12237;12238;12239;12281;12282;12283;12284;12526;12527;12528;12529;12530;12531;16472;16473;16474;16475;16476;16510;16511;16512;16513;16514;16515;16516;16517;17390;17391;21410;21411;21412;21413;21414;21415;22499;22500;22501;22502;22503;22504;22505;22506;22507;22508;23267;23786;23787;23788;23789;23790;23791;2379…	2776;3421;3473;5028;5620;10464;12237;12239;12283;12531;16476;16514;17391;21411;22507;23267;23792;25927;25979;25980;28091;28094	103;104;105;106;107		167;203;346;348;453			-1
Q14258	E3 ubiquitin/ISG15 ligase TRIM25	TRIM25	sp|Q14258|TRI25_HUMAN E3 ubiquitin/ISG15 ligase TRIM25 OS=Homo sapiens (Human) OX=9606 GN=TRIM25 PE=1 SV=2	1	19	19	19	35.9	23.2	25.6	70.973	0	27.024	15251000	25070000	31	491970	808730	4421400	4214100	5	5	74	Q14258	12	13	12	13	12	13	35.9	35.9	630	630	By MS/MS	By MS/MS	222	161;253;286;308;664;748;823;925;927;931;1299;1442;1463;1472;1734;2241;2540;2904;2947	True;True;True;True;True;True;True;True;True;True;True;True;True;True;True;True;True;True;True	169;267;301;326;706;801;880;985;987;991;1389;1542;1564;1573;1574;1854;2418;2742;3136;3184	1190;1191;1192;1193;1194;1195;1196;2017;2018;2019;2020;2021;2022;2250;2251;2252;2253;2254;2255;2256;2257;2258;2259;2260;2261;2262;2263;2264;2265;2266;2267;2439;2440;2441;2442;2443;2444;2445;5337;5338;5339;5340;5341;5342;5343;5344;5937;5938;5939;5940;5941;5942;5943;5944;5945;6464;6465;6466;6467;6468;6469;6470;6471;7311;7312;7313;7314;7315;7316;7317;7318;7324;7325;7326;7327;7328;7329;7330;7351;7352…	1163;1164;1165;1166;1167;1168;1973;1974;2134;2135;2136;2137;2138;2139;2140;2141;2142;2143;2144;2145;2146;2264;5131;5132;5635;5636;5637;5638;5639;5640;6530;7329;7330;7331;7332;7336;7337;7338;7348;7349;7350;13413;13414;13415;16482;16581;16607;16608;18523;18524;18525;18526;18527;18528;18529;18530;23164;23165;23166;23167;25363;25364;25365;25366;25367;25368;25369;25370;28333;28334;28335;28336;28337;28…	1165;1974;2142;2264;5132;5638;6530;7332;7337;7350;13414;16482;16581;16607;18526;23164;25367;28336;28676	235		248			-1
O00541	Pescadillo homolog	PES1	sp|O00541|PESC_HUMAN Pescadillo homolog OS=Homo sapiens (Human) OX=9606 GN=PES1 PE=1 SV=1	1	8	8	8	13.9	13.9	13.9	68.002	0	28.782	25781000	32302000	29	889010	1113900	6428900	6279900	8	7	72	O00541	8	8	8	8	8	8	13.9	13.9	588	588	By MS/MS	By MS/MS	52	521;786;1327;1487;1517;1570;1760;2384	True;True;True;True;True;True;True;True	555;840;1420;1589;1622;1677;1880;2572	4169;4170;4171;4172;4173;4174;4175;4176;4177;6195;6196;6197;6198;6199;6200;6201;6202;6203;12856;12857;12858;12859;12860;12861;12862;12863;12864;12865;12866;12867;12868;12869;12870;12871;12872;14744;14745;14746;14747;14748;14749;14750;14751;14752;14985;14986;14987;14988;14989;14990;14991;14992;14993;14994;14995;14996;14997;14998;14999;15000;15001;15002;15003;15403;15404;15405;15406;15407;15408;154…	3908;3909;3910;3911;3912;3913;3914;3915;3916;5894;5895;5896;5897;5898;5899;5900;14391;14392;14393;14394;14395;14396;14397;14398;14399;14400;14401;14402;14403;14404;14405;14406;16708;16709;16710;16711;16945;16946;16947;16948;16949;16950;16951;16952;16953;16954;16955;16956;16957;16958;16959;16960;16961;16962;17231;17232;17233;17234;17235;17236;17237;17238;17239;18612;18613;18614;18615;18616;18617;1…	3909;5894;14403;16708;16946;17238;18618;23876						-1
P01834	Ig kappa chain C region	IGKC	sp|P01834|IGKC_HUMAN Immunoglobulin kappa constant OS=Homo sapiens (Human) OX=9606 GN=IGKC PE=1 SV=2	1	3	3	3	63.6	63.6	63.6	11.765	0	175.81	8999700	10194000	5	1799900	2038900	4336900	4129100	5	8	71	P01834	3	3	3	3	3	3	63.6	63.6	107	107	By MS/MS	By MS/MS	84	2420;2783;2839	True;True;True	2609;3003;3066	22829;22830;22831;22832;22833;22834;22835;22836;22837;25592;25593;25594;25595;25596;25597;25598;25599;25600;25601;25602;25603;25604;25605;25606;25607;25608;25609;26465;26466;26467;26468;26469;26470;26471;26472;26473;26474;26475;26476;26477;26478;26479;26480;26481;26482	24031;24032;24033;24034;24035;24036;24037;24038;24039;26806;26807;26808;26809;26810;26811;26812;26813;26814;26815;26816;26817;26818;26819;26820;26821;26822;26823;26824;26825;26826;26827;26828;26829;26830;26831;26832;26833;26834;26835;26836;26837;26838;26839;26840;26841;26842;26843;26844;26845;26846;26847;26848;26849;26850;26851;26852;27998;27999;28000;28001;28002;28003;28004;28005;28006;28007;280…	24033;26847;28001						-1
P10515	Dihydrolipoyllysine-residue acetyltransferase component of pyruvate dehydrogenase complex, mitochondrial	DLAT	sp|P10515|ODP2_HUMAN Dihydrolipoyllysine-residue acetyltransferase component of pyruvate dehydrogenase complex, mitochondrial OS=Homo sapiens (Human) OX=9606 GN=DLAT PE=1 SV=3	1	16	16	16	33.4	14.5	13.4	68.996	0	96.411	11082000	17103000	34	325950	503030	4369200	4604200	2	2	70	P10515	8	8	8	8	8	8	33.4	33.4	647	647	By MS/MS	By MS/MS	111	252;406;494;923;1031;1261;1318;1372;1485;1763;1963;2461;2821;2950;2954;3016	True;True;True;True;True;True;True;True;True;True;True;True;True;True;True;True	266;431;526;983;1099;1345;1408;1466;1587;1883;2119;2654;3046;3187;3188;3192;3193;3257	2009;2010;2011;2012;2013;2014;2015;2016;3117;3118;3119;3120;3121;3122;3123;3124;3125;3950;3951;3952;3953;3954;3955;3956;3957;3958;7298;7299;7300;7301;8048;8049;8050;8051;8052;8053;11470;11471;11472;11473;11474;11475;11476;11477;11478;12294;12295;12296;12297;12298;12299;12300;12301;12302;13232;13233;13234;14739;14740;17024;17025;19455;23362;23363;23364;23365;23366;23367;23368;26157;26158;26159;261…	1972;2769;2770;3710;3711;3712;3713;3714;3715;3716;3717;3718;3719;3720;7316;7833;7834;7835;7836;7837;12271;12272;12273;12274;12275;12276;12277;12278;13481;13482;13483;13484;13485;13486;13487;13488;13489;13490;13491;14765;14766;16702;16703;18622;18623;21259;24961;24962;24963;24964;24965;27466;27467;27468;27469;28684;28685;28686;28687;28700;28701;28702;28703;28704;28705;28706;28707;28708;28709;29259	1972;2769;3714;7316;7835;12272;13484;14766;16702;18622;21259;24963;27466;28686;28708;29259	89;90;91;92;93		103;412;499;570;645			-1
P38646	Stress-70 protein, mitochondrial	HSPA9	sp|P38646|GRP75_HUMAN Stress-70 protein, mitochondrial OS=Homo sapiens (Human) OX=9606 GN=HSPA9 PE=1 SV=2	1	15	15	15	27.2	17.1	19.9	73.68	0	69.505	10944000	17590000	38	288010	462880	3246100	3131100	6	6	69	P38646	10	11	10	11	10	11	27.2	27.2	679	679	By MS/MS	By MS/MS	155	228;355;675;1374;1669;1872;1907;1949;2103;2112;2328;2365;2779;2924;3069	True;True;True;True;True;True;True;True;True;True;True;True;True;True;True	242;373;718;1468;1780;1998;2043;2105;2275;2285;2515;2553;2999;3156;3314	1816;1817;1818;1819;1820;1821;1822;1823;1824;2738;2739;2740;2741;2742;2743;2744;2745;2746;5432;5433;5434;5435;5436;13251;13252;13253;13254;13255;13256;13257;13258;13259;13260;13261;13262;13263;13264;13265;13266;13267;13268;16112;16113;17934;17935;17936;17937;17938;17939;18257;18258;18259;18260;18261;18262;18263;18264;19380;19381;19382;19383;19384;19385;19386;19387;19388;20598;20599;20600;20601;20…	1776;1777;1778;1779;1780;1781;1782;1783;1784;2466;2467;2468;2469;2470;2471;2472;2473;2474;5244;5245;14777;14778;14779;14780;14781;14782;14783;14784;14785;14786;14787;14788;17816;19523;19983;21216;21217;21218;22238;22239;22240;22241;22242;22243;22310;22311;23586;23587;23588;23589;23590;23591;23592;23777;23778;23779;26746;26747;26748;26749;26750;26751;26752;26753;26754;28496;28497;28498;28499;28500…	1780;2473;5245;14779;17816;19523;19983;21216;22241;22310;23590;23777;26748;28497;29668	169;170		174;389			-1
O60508	Pre-mRNA-processing factor 17	CDC40	sp|O60508|PRP17_HUMAN Pre-mRNA-processing factor 17 OS=Homo sapiens (Human) OX=9606 GN=CDC40 PE=1 SV=1	1	25	25	25	49.7	3.3	0	65.521	0	114	221120	0	35	6317.7	0	41728	0	0	0	67	O60508	1	0	1	0	1	0	49.7	49.7	579	579	By matching		65	336;484;541;654;777;788;789;831;935;1098;1240;1346;1450;1718;1857;1858;2034;2149;2397;2519;2599;2647;2831;3035;3100	True;True;True;True;True;True;True;True;True;True;True;True;True;True;True;True;True;True;True;True;True;True;True;True;True	354;514;577;694;831;842;843;844;845;888;995;1168;1321;1440;1551;1837;1980;1981;2201;2323;2586;2720;2805;2856;3058;3278;3347	2609;2610;2611;3878;3879;3880;4338;4339;4340;5259;5260;6133;6134;6135;6213;6214;6215;6216;6217;6218;6219;6220;6221;6222;6223;6224;6225;6519;6520;6521;6522;7391;7392;7393;8454;8455;8456;8457;10559;10560;10561;13062;13063;13064;14500;14501;14502;14503;14504;14505;16738;16739;16740;17725;17726;17727;17728;17729;17730;20014;20015;20016;20898;20899;20900;22693;22694;22695;23755;23756;23757;24379;24380…	2365;3636;3637;4102;4103;5041;5821;5822;5823;5902;5903;5904;5905;5906;5907;5908;5909;5910;5911;5912;6559;7365;7366;8140;8141;8142;8143;11217;11218;11219;14635;14636;14637;16523;16524;16525;16526;18393;18394;19285;19286;19287;19288;19289;19290;21738;21739;21740;22497;22498;23944;23945;23946;25217;25692;25693;25965;25966;25967;27948;27949;27950;29325;29326;29845;29846;29847	2365;3636;4102;5041;5822;5904;5911;6559;7366;8140;11219;14636;16526;18393;19286;19289;21739;22497;23945;25217;25693;25965;27948;29325;29847	62;63		38;395			-1
P01840	Ig kappa-b4 chain C region		sp|P01840|KAC4_RABIT Ig kappa-b4 chain C region OS=Oryctolagus cuniculus PE=1 SV=1	1	3	3	3	42.7	42.7	42.7	11.043	0	323.31	342690000	415420000	4	85671000	103860000	374870000	364680000	7	7	63	CON__sp|P01840|KAC4_RABIT	3	3	3	3	3	3	42.7	42.7	103	103	By MS/MS	By MS/MS	14	2746;3006;3007	True;True;True	2962;3247;3248	25386;25387;25388;25389;25390;25391;25392;25393;25394;27806;27807;27808;27809;27810;27811;27812;27813;27814;27815;27816;27817;27818;27819;27820;27821;27822;27823;27824;27825;27826;27827;27828;27829;27830;27831;27832;27833;27834	26617;26618;26619;26620;26621;26622;26623;29185;29186;29187;29188;29189;29190;29191;29192;29193;29194;29195;29196;29197;29198;29199;29200;29201;29202;29203;29204;29205;29206;29207;29208;29209;29210;29211;29212;29213;29214;29215;29216;29217;29218;29219;29220;29221;29222;29223;29224;29225;29226;29227;29228;29229;29230;29231;29232;29233;29234;29235;29236;29237;29238;29239;29240	26622;29225;29234					+	-1
O00116	Alkyldihydroxyacetonephosphate synthase, peroxisomal	AGPS	sp|O00116|ADAS_HUMAN Alkyldihydroxyacetonephosphate synthase, peroxisomal OS=Homo sapiens (Human) OX=9606 GN=AGPS PE=1 SV=1	1	14	14	14	30.5	22.8	23.1	72.911	0	122.27	27026000	26001000	35	772180	742880	5201700	4783500	7	6	63	O00116	11	11	11	11	11	11	30.5	30.5	658	658	By MS/MS	By MS/MS	48	28;262;695;706;728;764;873;929;1274;1295;1981;2233;2683;3091	True;True;True;True;True;True;True;True;True;True;True;True;True;True	29;276;745;756;780;818;933;989;1363;1385;2139;2410;2894;2895;3337	171;172;173;174;175;176;177;178;179;2078;2079;2080;2081;2082;2083;2084;2085;5603;5604;5605;5606;5607;5608;5609;5610;5611;5667;5668;5669;5670;5671;5672;5673;5674;5781;5782;5783;5784;5785;5786;5787;5788;5789;6043;6044;6045;6046;6955;7338;7339;7340;7341;7342;7343;7344;7345;11638;11639;11640;11641;12163;12164;12165;12166;12167;12168;12169;12170;12171;19598;19599;19600;19601;19602;19603;21550;21551;21…	115;1995;1996;1997;5393;5394;5395;5396;5397;5398;5399;5446;5447;5448;5449;5450;5520;5521;5522;5523;5524;5525;5526;5527;5737;5738;7102;7340;7341;7342;7343;7344;7345;7346;12545;13397;13398;13399;13400;13401;13402;13403;13404;13405;21406;21407;23104;23105;23106;23107;26300;26301;26302;26303;26304;26305;26306;26307;26308;26309;26310;26311;29799	115;1996;5398;5448;5526;5738;7102;7344;12545;13403;21406;23106;26307;29799	44;45		263;638			-1
Q9BVP2	Guanine nucleotide-binding protein-like 3	GNL3	sp|Q9BVP2|GNL3_HUMAN Guanine nucleotide-binding protein-like 3 OS=Homo sapiens (Human) OX=9606 GN=GNL3 PE=1 SV=2	1	15	15	15	27.9	16.2	25.1	61.992	0	88.562	14083000	41586000	26	541650	1599500	3956200	8041800	3	10	62	Q9BVP2	9	12	9	12	9	12	27.9	27.9	549	549	By MS/MS	By MS/MS	341	635;891;1373;1425;1430;1431;1432;1474;1565;1667;1841;2399;2400;2511;2884	True;True;True;True;True;True;True;True;True;True;True;True;True;True;True	675;951;1467;1523;1528;1529;1530;1576;1672;1778;1964;2588;2589;2711;2712;3113	5145;5146;5147;5148;5149;5150;5151;7068;13235;13236;13237;13238;13239;13240;13241;13242;13243;13244;13245;13246;13247;13248;13249;13250;14241;14242;14243;14244;14245;14246;14247;14248;14374;14375;14376;14377;14378;14379;14380;14381;14382;14383;14384;14385;14386;14387;14388;14643;15364;15365;15366;15367;15368;15369;15370;15371;15372;15373;15374;15375;15376;15377;15378;16103;16104;16105;16106;16107…	4969;4970;4971;4972;4973;7182;14767;14768;14769;14770;14771;14772;14773;14774;14775;14776;16168;16169;16170;16424;16425;16426;16427;16428;16429;16430;16431;16432;16433;16434;16611;17215;17216;17217;17218;17219;17220;17221;17222;17808;17809;17810;17811;17812;17813;19173;19174;19175;23948;23949;23950;23951;23952;25192;25193;28233;28234;28235;28236;28237;28238;28239;28240	4972;7182;14776;16168;16427;16429;16433;16611;17221;17809;19175;23949;23952;25193;28240	298;299		106;334			-1
Q9NQW7	Xaa-Pro aminopeptidase 1	XPNPEP1	sp|Q9NQW7|XPP1_HUMAN Xaa-Pro aminopeptidase 1 OS=Homo sapiens (Human) OX=9606 GN=XPNPEP1 PE=1 SV=3	2	15	15	15	24.2	24.2	24.2	69.917	0	15.01	76162000	79729000	33	2308000	2416000	7107000	15029000	8	9	62	Q9NQW7;O00462	15	14	15	14	15	14	24.2	24.2	623	623;879	By MS/MS	By MS/MS	366	139;270;908;909;910;914;917;1011;1173;2120;2333;2334;2714;2883;3008	True;True;True;True;True;True;True;True;True;True;True;True;True;True;True	146;284;968;969;970;974;977;1076;1247;2294;2520;2521;2928;3112;3249	1036;1037;1038;1039;1040;1041;1042;2130;2131;2132;2133;2134;2135;2136;7192;7193;7194;7195;7196;7197;7198;7199;7200;7201;7202;7203;7204;7205;7206;7207;7208;7209;7210;7211;7212;7213;7214;7215;7216;7244;7245;7246;7247;7248;7249;7250;7251;7252;7253;7254;7255;7263;7264;7265;7266;7267;7268;7269;7270;7887;7888;7889;7890;7891;7892;7893;9494;9495;9496;9497;9498;9499;20711;20712;20713;20714;20715;20716;207…	1013;1014;1015;1016;2035;2036;2037;2038;7268;7269;7270;7271;7272;7273;7274;7275;7276;7277;7278;7279;7280;7281;7290;7291;7295;7722;7723;7724;7725;7726;9772;9773;9774;9775;9776;9777;9778;9779;22339;22340;22341;23615;23616;23617;23618;23619;23620;23621;23622;23623;23624;23625;23626;23627;26462;26463;28227;28228;28229;28230;28231;28232;29241;29242;29243	1013;2035;7270;7274;7281;7290;7295;7724;9773;22340;23616;23625;26463;28232;29242						-1;-1
Q13042	Cell division cycle protein 16 homolog	CDC16	sp|Q13042|CDC16_HUMAN Cell division cycle protein 16 homolog OS=Homo sapiens (Human) OX=9606 GN=CDC16 PE=1 SV=2	1	11	11	11	20.6	16.9	20.6	71.655	0	98.269	52653000	50144000	27	1950100	1857200	9434000	8263300	9	10	61	Q13042	10	11	10	11	10	11	20.6	20.6	620	620	By MS/MS	By MS/MS	209	200;587;629;1136;1350;1539;1976;2207;2551;3068;3115	True;True;True;True;True;True;True;True;True;True;True	213;626;669;1208;1444;1644;2134;2382;2755;3313;3362	1594;1595;1596;1597;1598;1599;1600;1601;1602;1603;1604;1605;1606;1607;1608;4838;4839;4840;4841;4842;4843;4844;4845;4846;4847;4848;5112;5113;5114;5115;5116;5117;8732;8733;8734;8735;8736;8737;13097;13098;13099;13100;13101;13102;13103;13104;15155;15156;15157;15158;15159;15160;15161;15162;19575;19576;19577;19578;19579;19580;21353;21354;21355;21356;21357;21358;21359;21360;21361;24001;24002;24003;24004…	1560;1561;1562;1563;1564;1565;1566;1567;1568;4734;4735;4736;4737;4738;4739;4740;4741;4742;4951;4952;4953;4954;4955;4956;8326;8327;8328;8329;8330;14658;14659;14660;14661;14662;14663;17059;17060;17061;17062;17063;17064;21393;21394;21395;22931;22932;25431;25432;25433;29657;29658;29659;29660;29661;29662;29663;29664;29665;29666;29667;29956	1561;4737;4951;8328;14663;17061;21394;22932;25431;29666;29956	224;225		95;123			-1
Q8NHQ9	ATP-dependent RNA helicase DDX55	DDX55	sp|Q8NHQ9|DDX55_HUMAN ATP-dependent RNA helicase DDX55 OS=Homo sapiens (Human) OX=9606 GN=DDX55 PE=1 SV=3	1	9	9	9	16.7	16.7	16.7	68.546	0	17.584	21050000	31326000	33	637860	949290	4221200	5396100	7	9	60	Q8NHQ9	9	9	9	9	9	9	16.7	16.7	600	600	By MS/MS	By MS/MS	299	93;778;790;1066;1637;1984;2023;2469;2537	True;True;True;True;True;True;True;True;True	99;832;846;1135;1748;2143;2190;2665;2739	675;676;677;678;679;680;681;6136;6137;6138;6139;6140;6141;6142;6143;6226;6227;6228;6229;6230;6231;6232;6233;8290;8291;8292;8293;8294;8295;8296;8297;15864;15865;15866;15867;15868;15869;15870;15871;15872;19623;19624;19625;19626;19627;19628;19629;19630;19631;19632;19633;19634;19635;19636;19637;19638;19639;19965;19966;19967;19968;19969;19970;19971;19972;19973;23421;23422;23423;23424;23425;23426;23427…	752;753;754;755;756;757;5824;5913;5914;5915;5916;5917;8006;8007;8008;8009;8010;17541;17542;17543;17544;17545;17546;17547;17548;21416;21417;21418;21419;21420;21421;21422;21423;21424;21425;21426;21427;21428;21429;21706;21707;21708;21709;21710;21711;25020;25021;25022;25023;25024;25025;25026;25300;25301;25302;25303;25304;25305;25306;25307	754;5824;5916;8006;17545;21416;21706;25026;25303						-1
Q9ULC5	Long-chain-fatty-acid--CoA ligase 5	ACSL5	sp|Q9ULC5|ACSL5_HUMAN Long-chain-fatty-acid--CoA ligase 5 OS=Homo sapiens (Human) OX=9606 GN=ACSL5 PE=1 SV=1	3	23	23	23	41	21.4	25.2	75.99	0	119.65	20696000	55433000	32	646750	1732300	3653900	7514800	3	9	58	Q9ULC5;P33121;Q9UKU0	12	14	12	14	12	14	41	41	683	683;698;697	By MS/MS	By MS/MS	393	76;124;187;519;844;936;1005;1048;1061;1172;1282;1344;1446;1520;1521;2406;2560;2701;2750;2753;2870;2901;2902	True;True;True;True;True;True;True;True;True;True;True;True;True;True;True;True;True;True;True;True;True;True;True	82;131;196;553;902;996;1070;1117;1130;1246;1372;1438;1547;1625;1626;2595;2765;2915;2966;2969;3098;3131;3132;3133	536;537;538;539;540;541;542;543;938;1511;1512;1513;1514;1515;4157;4158;4159;4160;4161;4162;4163;4164;4165;6623;6624;7394;7395;7396;7397;7398;7399;7850;7851;7852;7853;7854;7855;7856;7857;8181;8182;8183;8184;8185;8186;8266;8267;9493;11915;13044;13045;13046;13047;13048;13049;13050;13051;13052;14473;15013;15014;15015;15016;15017;15018;15019;15020;22755;22756;22757;22758;24068;24069;25114;25115;25116;…	598;599;600;953;1500;1501;1502;1503;1504;3900;3901;3902;3903;3904;3905;3906;6618;7367;7368;7687;7688;7689;7926;7986;9771;13012;14627;14628;14629;14630;14631;14632;16508;16509;16967;16968;16969;16970;16971;23985;25468;25469;26403;26404;26405;26406;26407;26408;26409;26634;26642;28120;28121;28326;28327;28328;28329;28330	600;953;1500;3900;6618;7367;7687;7926;7986;9771;13012;14631;16508;16970;16971;23985;25468;26407;26634;26642;28121;28326;28330	341;342		212;272			-1;-1;-1
Q96NE9	FERM domain-containing protein 6	FRMD6	sp|Q96NE9|FRMD6_HUMAN FERM domain-containing protein 6 OS=Homo sapiens (Human) OX=9606 GN=FRMD6 PE=1 SV=1	1	14	14	14	23.6	23.6	23.6	72.043	0	70.244	67681000	65040000	33	2050900	1970900	16717000	11931000	19	18	57	Q96NE9	14	14	14	14	14	14	23.6	23.6	622	622	By MS/MS	By MS/MS	325	450;472;533;752;996;1117;1120;1393;1422;1547;1867;2166;2222;3162	True;True;True;True;True;True;True;True;True;True;True;True;True;True	478;501;568;805;1061;1188;1189;1192;1489;1519;1652;1992;1993;2340;2399;3412	3415;3416;3417;3418;3419;3420;3421;3422;3765;3766;3767;3768;3769;3770;3771;3772;3773;3774;3775;4251;4252;4253;4254;4255;5968;5969;5970;5971;7803;7804;7805;7806;8598;8599;8600;8601;8602;8603;8604;8605;8618;8619;8620;8621;8622;8623;8624;8625;8626;8627;8628;8629;8630;8631;8632;8633;8634;13476;13477;13478;13479;13480;13481;13482;14211;14212;15223;15224;15225;15226;15227;15228;15229;17898;17899;17900;…	2992;2993;2994;2995;2996;2997;3478;3479;3480;3481;3482;3483;3484;3987;5673;5674;7658;7659;7660;7661;8229;8230;8231;8232;8233;8234;8241;8242;8243;8244;8245;8246;8247;8248;8249;8250;8251;14986;14987;14988;14989;14990;14991;16144;16145;17109;17110;17111;17112;17113;19508;19509;19510;19511;19512;19513;19514;22771;22772;22773;23016;23017;30210	2994;3479;3987;5674;7661;8231;8243;14990;16145;17113;19508;22771;23016;30210	283	55	325	544		-1
P08238	Heat shock protein HSP 90-beta	HSP90AB1	sp|P08238|HS90B_HUMAN Heat shock protein HSP 90-beta OS=Homo sapiens (Human) OX=9606 GN=HSP90AB1 PE=1 SV=4	7	15	15	15	24.7	21	22	83.263	0	176.02	23838000	29854000	33	722350	904680	4674700	4534800	6	6	56	P08238;P07900;Q58FF8;Q58FF7;Q14568;P14625;Q58FF6	13	13	13	13	13	13	24.7	24.7	724	724;732;381;597;343;803;505	By MS/MS	By MS/MS	102	47;162;545;625;676;1038;1152;1163;1599;2020;2236;2450;2491;3094;3098	True;True;True;True;True;True;True;True;True;True;True;True;True;True;True	49;170;582;665;719;1106;1225;1237;1707;2187;2413;2643;2687;3340;3341;3345	287;288;289;290;291;292;293;1197;1198;1199;1200;1201;1202;1203;1204;1205;4376;4377;4378;4379;4380;4381;4382;4383;5089;5090;5091;5092;5093;5094;5095;5096;5437;5438;5439;5440;5441;5442;5443;5444;5445;8101;8102;8103;8104;8105;8106;8107;8108;8109;8945;8946;8947;8948;8949;8950;9016;9017;9018;9019;9020;15584;19950;19951;19952;19953;19954;19955;19956;19957;19958;21574;21575;21576;21577;21578;23280;23281…	170;171;172;173;1169;4133;4134;4135;4943;4944;4945;4946;4947;5246;5247;5248;5249;7879;7880;7881;7882;7883;7884;7885;7886;7887;8669;8670;8671;8742;8743;17364;21698;21699;21700;21701;21702;23121;23122;23123;24861;24862;24863;25133;25134;25135;25136;25137;29808;29809;29810;29837;29838;29839;29840;29841;29842;29843	171;1169;4134;4946;5247;7886;8671;8743;17364;21702;23122;24863;25135;29808;29842	74	13	466	255		-1;-1;-1;-1;-1;-1;-1
Q96HC4	PDZ and LIM domain protein 5	PDLIM5	sp|Q96HC4|PDLI5_HUMAN PDZ and LIM domain protein 5 OS=Homo sapiens (Human) OX=9606 GN=PDLIM5 PE=1 SV=5	1	12	12	12	24.5	19.3	24.5	63.944	0	14.586	26297000	44116000	33	796880	1336800	7052300	7595500	7	10	56	Q96HC4	10	12	10	12	10	12	24.5	24.5	596	596	By MS/MS	By MS/MS	320	65;250;385;843;981;1247;1626;2180;2520;2625;3009;3148	True;True;True;True;True;True;True;True;True;True;True;True	70;264;404;901;1045;1329;1735;2354;2721;2832;3250;3397	446;447;448;449;450;451;452;453;1985;1986;1987;1988;1989;1990;1991;1992;1993;1994;1995;1996;1997;1998;1999;2000;2916;2917;2918;2919;2920;2921;2922;2923;2924;6614;6615;6616;6617;6618;6619;6620;6621;6622;7709;7710;7711;7712;7713;7714;7715;7716;7717;11392;11393;11394;11395;11396;11397;11398;11399;15770;15771;15772;15773;15774;15775;15776;15777;21182;21183;21184;23758;23759;23760;23761;23762;23763;23…	528;529;530;1954;1955;1956;1957;1958;1959;1960;1961;1962;1963;1964;1965;1966;2602;2603;2604;6616;6617;7600;7601;7602;7603;7604;7605;7606;7607;12219;12220;12221;12222;12223;17485;17486;17487;22797;25218;25219;25220;25221;25222;25223;25880;25881;25882;25883;25884;25885;25886;29244;29245;30158;30159;30160	528;1955;2603;6616;7600;12219;17486;22797;25218;25880;29245;30158	281;282		26;123			-1
Q9P2G9	Kelch-like protein 8	KLHL8	sp|Q9P2G9|KLHL8_HUMAN Kelch-like protein 8 OS=Homo sapiens (Human) OX=9606 GN=KLHL8 PE=1 SV=4	1	17	17	17	30.2	24.5	26.3	68.801	0	67.544	25499000	86105000	39	653820	2207800	6901700	14167000	6	14	56	Q9P2G9	14	15	14	15	14	15	30.2	30.2	620	620	By MS/MS	By MS/MS	379	77;194;304;383;491;907;1128;1402;1613;1690;1840;2080;2433;3048;3053;3057;3075	True;True;True;True;True;True;True;True;True;True;True;True;True;True;True;True;True	83;204;322;402;523;967;1200;1499;1722;1804;1963;2252;2622;3293;3298;3302;3321	544;545;546;547;548;1555;1556;2419;2420;2421;2422;2423;2905;2906;2907;2908;2909;2910;3930;3931;7191;8684;8685;8686;8687;8688;13569;13570;13571;13572;13573;15680;15681;15682;15683;15684;16274;16275;16276;16277;16278;17622;17623;17624;17625;20387;20388;20389;20390;20391;20392;20393;20394;20395;20396;22913;22914;22915;22916;22917;28126;28127;28128;28129;28130;28155;28156;28157;28158;28159;28160;2817…	601;602;603;604;1531;2255;2593;2594;2595;2596;2597;2598;3686;7267;8268;8269;8270;8271;8272;15076;15077;15078;17408;17409;17410;17958;17959;17960;17961;17962;17963;19169;19170;19171;19172;22012;22013;22014;24125;24126;24127;29599;29600;29620;29621;29622;29623;29630;29631;29632;29677;29678;29679;29680;29681;29682	603;1531;2255;2595;3686;7267;8268;15078;17410;17962;19169;22014;24126;29599;29621;29630;29677	323		620			-1
P13647	Keratin, type II cytoskeletal 5	KRT5	sp|P13647|K2C5_HUMAN Keratin, type II cytoskeletal 5 OS=Homo sapiens GN=KRT5 PE=1 SV=3	2	32	25	5	40.2	23.6	15.9	62.378	0	121.05	18052000	9473100	31	582320	305580	5154900	2099800	3	1	54	P13647;CON__sp|P13647|K2C5_HUMAN	17	10	10	6	2	2	33.4	6.3	590	590;590	By MS/MS	By MS/MS	30	66;485;726;737;738;1068;1427;1497;1773;1986;1992;1993;1998;2016;2062;2159;2173;2174;2295;2391;2498;2499;2541;2638;2772;2773;2833;2983;2990;3064;3076;3078	True;True;True;False;False;True;False;True;True;True;False;False;False;True;True;True;True;True;True;True;True;True;True;True;True;True;True;True;True;True;False;True	71;515;777;778;789;790;1137;1525;1599;1894;2145;2151;2152;2159;2181;2232;2233;2333;2347;2348;2475;2579;2694;2695;2743;2845;2989;2990;2991;2992;3060;3223;3230;3309;3322;3324	454;3881;3882;5775;5776;5777;5778;5779;5868;5869;5870;5871;5872;5873;5874;5875;5876;5877;5878;5879;5880;8300;14267;14268;14269;14270;14271;14272;14273;14274;14275;14276;14277;14278;14814;14815;14816;14817;14818;14819;17082;17083;17084;17085;17086;17087;17088;17089;19644;19645;19687;19688;19689;19690;19691;19692;19693;19694;19695;19696;19697;19698;19699;19700;19701;19702;19703;19704;19705;19706;19…	531;3638;5516;5517;5518;5589;5590;5591;5592;5593;5594;5595;5596;5597;5598;5599;5600;5601;5602;5603;5604;5605;5606;8012;16180;16181;16182;16183;16184;16185;16186;16797;16798;16799;18653;18654;21432;21433;21459;21460;21461;21462;21463;21464;21465;21466;21467;21468;21469;21470;21471;21472;21473;21474;21475;21476;21477;21478;21479;21480;21481;21482;21483;21484;21485;21486;21487;21488;21489;21490;2149…	531;3638;5518;5592;5604;8012;16185;16799;18653;21433;21459;21489;21523;21616;21926;22759;22781;22782;23388;23919;25157;25158;25372;25926;26728;26734;27955;29049;29068;29644;29693;29733	26;27;28;29		274;303;389;457		+	-1;-1
Q68CZ6	HAUS augmin-like complex subunit 3	HAUS3	sp|Q68CZ6|HAUS3_HUMAN HAUS augmin-like complex subunit 3 OS=Homo sapiens (Human) OX=9606 GN=HAUS3 PE=1 SV=1	1	17	17	17	30.7	28.5	30.7	69.65	0	271.67	65858000	118170000	31	2124400	3812000	9749800	13844000	16	23	54	Q68CZ6	16	17	16	17	16	17	30.7	30.7	603	603	By MS/MS	By MS/MS	262	291;614;622;656;852;1310;1708;1709;1757;1871;2121;2160;2199;2354;2355;2408;3044	True;True;True;True;True;True;True;True;True;True;True;True;True;True;True;True;True	308;654;662;697;698;910;1400;1827;1828;1877;1997;2295;2334;2373;2374;2542;2543;2597;3289	2321;2322;2323;2324;5032;5033;5034;5035;5036;5037;5038;5039;5040;5076;5077;5078;5079;5080;5081;5082;5083;5084;5085;5277;5278;5279;5280;5281;6669;6670;6671;6672;6673;6674;6675;6676;12258;16643;16644;16645;16646;16647;16648;16649;16650;16651;16652;16653;16654;16655;16656;16657;16658;16659;16660;16661;16662;16663;16664;16665;16666;16667;16997;16998;17926;17927;17928;17929;17930;17931;17932;17933;207…	2180;2181;4898;4899;4900;4901;4902;4903;4904;4905;4906;4936;4937;4938;4939;5052;5053;5054;5055;6673;6674;6675;6676;13455;18298;18299;18300;18301;18302;18303;18304;18305;18306;18307;18308;18605;19519;19520;19521;19522;22342;22343;22760;22861;22862;23742;23743;23744;23745;23989;23990;29589;29590;29591;29592	2181;4898;4937;5054;6673;13455;18298;18302;18605;19519;22343;22760;22861;23742;23743;23989;29590	258;259;260;261		158;322;349;425			-1
Q9UBU9	Nuclear RNA export factor 1	NXF1	sp|Q9UBU9|NXF1_HUMAN Nuclear RNA export factor 1 OS=Homo sapiens (Human) OX=9606 GN=NXF1 PE=1 SV=1	1	14	14	14	25.5	25.5	25.5	70.182	0	40	44297000	52710000	31	1428900	1700300	10037000	9521500	7	9	54	Q9UBU9	14	13	14	13	14	13	25.5	25.5	619	619	By MS/MS	By MS/MS	381	134;229;454;1020;1546;1947;2329;2340;2367;2556;2563;2604;3073;3125	True;True;True;True;True;True;True;True;True;True;True;True;True;True	141;243;482;1088;1651;2103;2516;2527;2555;2760;2768;2810;3319;3373	1004;1005;1006;1007;1008;1009;1010;1825;1826;1827;1828;1829;1830;1831;1832;1833;3467;3468;3469;3470;3471;3472;3473;3474;7973;7974;7975;7976;7977;7978;7979;7980;7981;15215;15216;15217;15218;15219;15220;15221;15222;19365;19366;19367;19368;19369;19370;19371;19372;19373;22232;22233;22234;22235;22236;22237;22238;22239;22240;22241;22242;22243;22244;22245;22246;22308;22309;22310;22311;22312;22313;22314;…	1002;1003;1004;1785;1786;1787;1788;1789;3029;3030;3031;3032;3033;3034;3035;7783;7784;17106;17107;17108;21204;21205;21206;21207;21208;21209;23593;23594;23595;23596;23597;23598;23599;23600;23601;23602;23603;23604;23681;23682;23683;23781;25452;25453;25454;25473;25474;25703;25704;29675;30001;30002;30003;30004;30005	1004;1789;3031;7784;17108;21207;23596;23683;23781;25454;25473;25703;29675;30003	326;327		61;283			-1
P31040	Succinate dehydrogenase [ubiquinone] flavoprotein subunit, mitochondrial	SDHA	sp|P31040|SDHA_HUMAN Succinate dehydrogenase [ubiquinone] flavoprotein subunit, mitochondrial OS=Homo sapiens (Human) OX=9606 GN=SDHA PE=1 SV=2	1	15	15	15	25	18.4	14.5	72.691	0	93.33	28496000	22775000	31	919230	734690	5470900	3131900	5	2	53	P31040	10	8	10	8	10	8	25	25	664	664	By MS/MS	By MS/MS	144	10;864;1032;1123;1150;1403;1438;2064;2504;2658;2807;2882;2980;3002;3055	True;True;True;True;True;True;True;True;True;True;True;True;True;True;True	11;924;1100;1195;1223;1500;1537;2235;2702;2703;2867;3031;3032;3111;3220;3242;3300	75;76;77;6885;6886;6887;6888;6889;6890;6891;6892;8054;8055;8056;8057;8058;8059;8655;8928;8929;8930;8931;8932;8933;8934;8935;8936;13574;13575;13576;13577;13578;13579;13580;13581;13582;13583;13584;14423;14424;14425;14426;14427;14428;14429;14430;20283;20284;20285;20286;20287;20288;23625;23626;23627;23628;23629;23630;23631;23632;23633;23634;23635;23636;23637;23638;23639;23640;23641;23642;23643;23644;…	53;7044;7045;7046;7047;7048;7049;7050;7838;7839;7840;8259;8663;8664;8665;15079;15080;16456;16457;16458;16459;16460;21930;21931;21932;21933;25170;25171;25172;25173;25174;25175;26016;26017;26018;26019;27422;27423;27424;28225;28226;29003;29116;29117;29118;29119;29120;29121;29122;29123;29124;29125;29625;29626;29627	53;7049;7839;8259;8663;15079;16456;21932;25171;26019;27424;28226;29003;29125;29626	138;139		279;519			-1
P15924	Desmoplakin	DSP	sp|P15924|DESP_HUMAN Desmoplakin OS=Homo sapiens (Human) OX=9606 GN=DSP PE=1 SV=3	1	27	27	27	11.5	8.8	9.9	331.77	0	169.52	71413000	232590000	163	438120	1426900	14572000	36835000	10	28	52	P15924	21	23	21	23	21	23	11.5	11.5	2871	2871	By MS/MS	By MS/MS	123	307;693;694;780;781;875;933;947;957;1042;1234;1305;1313;1396;1658;1659;1660;1736;1744;1798;1827;2000;2169;2505;2669;3023;3024	True;True;True;True;True;True;True;True;True;True;True;True;True;True;True;True;True;True;True;True;True;True;True;True;True;True;True	325;743;744;834;835;935;993;1007;1017;1018;1110;1313;1395;1403;1493;1769;1770;1771;1856;1864;1919;1950;2161;2343;2704;2705;2879;3265;3266;3267	2435;2436;2437;2438;5596;5597;5598;5599;5600;5601;5602;6153;6154;6155;6156;6157;6158;6159;6160;6964;6965;7377;7378;7379;7380;7381;7382;7383;7462;7463;7464;7465;7466;7520;7521;7522;8125;8126;10174;10175;10176;10177;12224;12225;12226;12227;12228;12229;12230;12231;12272;13536;13537;13538;13539;13540;13541;13542;13543;16061;16062;16063;16064;16065;16066;16067;16068;16069;16070;16071;16882;16883;16884…	2263;5389;5390;5391;5392;5833;5834;5835;5836;7105;7106;7359;7360;7361;7362;7410;7411;7429;7430;7431;7897;10515;13437;13438;13439;13464;15055;17786;17787;17788;17789;17790;17791;18544;18545;18546;18563;18564;18565;18952;19139;21528;22777;25176;25177;25178;25179;26082;26083;29269;29270;29271;29272	2263;5389;5392;5833;5834;7106;7359;7411;7431;7897;10515;13439;13464;15055;17787;17788;17791;18544;18563;18952;19139;21528;22777;25177;26082;29269;29272	113;114;115;116;117		2354;2477;2684;2793;2819			-1
Q7Z794	Keratin, type II cytoskeletal 1b	KRT77	sp|Q7Z794|K2C1B_HUMAN Keratin, type II cytoskeletal 1b OS=Homo sapiens GN=KRT77 PE=2 SV=3	2	25	21	17	36.5	5	4.7	61.901	0	310.92	0	0	31	0	0	0	0	0	0	51	Q7Z794;CON__sp|Q7Z794|K2C1B_HUMAN	4	3	0	0	0	0	32.9	25.4	578	578;578	By matching	By matching	42	323;502;667;737;738;784;1375;1739;1740;1742;1743;2165;2217;2441;2455;2462;2467;2500;2503;2667;2668;2757;2844;3076;3137	True;True;True;False;False;False;True;True;True;True;True;True;True;True;True;True;True;True;True;True;True;True;True;False;True	341;534;709;710;789;790;838;1469;1859;1860;1862;1863;2339;2393;2394;2632;2648;2655;2662;2696;2700;2701;2877;2878;2973;3072;3322;3386	2540;4024;5387;5388;5389;5868;5869;5870;5871;5872;5873;5874;5875;5876;5877;5878;5879;5880;6173;6174;6175;6176;6177;6178;6179;6180;6181;6182;6183;6184;6185;6186;6187;6188;6189;13269;16898;16899;16900;16901;16914;16915;21112;21113;21427;21428;21429;21430;23116;23117;23316;23317;23318;23319;23369;23370;23371;23415;23416;23612;23613;23622;23623;23624;24808;24809;24810;24811;24812;24813;25441;25442;26…	2336;3772;5219;5220;5221;5222;5589;5590;5591;5592;5593;5594;5595;5596;5597;5598;5599;5600;5601;5602;5603;5604;5605;5606;5845;5846;5847;5848;5849;5850;5851;5852;5853;5854;5855;5856;5857;5858;5859;5860;5861;5862;5863;5864;5865;5866;5867;5868;5869;5870;5871;5872;5873;5874;5875;5876;5877;5878;5879;5880;5881;5882;5883;5884;5885;5886;5887;5888;5889;5890;14789;18550;18551;18552;18553;18561;18562;22768;2…	2336;3772;5221;5592;5604;5871;14789;18550;18552;18561;18562;22769;22979;24509;24907;24968;25017;25160;25167;26077;26081;26648;28034;29693;30106	42;43		169;234		+	-1;-1
Q5D862	Filaggrin-2	FLG2	sp|Q5D862|FILA2_HUMAN Filaggrin-2 OS=Homo sapiens GN=FLG2 PE=1 SV=1	2	24	24	24	22.2	0	0	248.07	0	323.31	0	0	74	0	0	0	0	0	0	50	Q5D862;CON__sp|Q5D862|FILA2_HUMAN	0	0	0	0	0	0	22.2	22.2	2391	2391;2391			38	255;692;810;1083;1085;1086;1108;1113;1119;2021;2113;2126;2138;2203;2418;2419;2427;2428;2546;2562;2565;2594;2762;3150	True;True;True;True;True;True;True;True;True;True;True;True;True;True;True;True;True;True;True;True;True;True;True;True	269;742;866;1152;1154;1155;1178;1184;1191;2188;2286;2300;2312;2378;2607;2608;2616;2617;2750;2767;2770;2800;2978;3399	2029;2030;2031;2032;5595;6348;6349;6350;8399;8409;8410;8411;8537;8538;8539;8540;8587;8588;8615;8616;8617;19959;19960;20677;20678;20679;20732;20813;21322;21323;21324;22822;22823;22824;22825;22826;22827;22828;22878;22879;22880;22881;22882;22883;22884;23973;24077;24078;24079;24093;24339;24340;25458;25459;28795;28796	1977;1978;1979;5388;5994;5995;5996;8111;8114;8115;8116;8117;8189;8190;8191;8192;8220;8221;8239;8240;21703;21704;22312;22313;22348;22401;22903;22904;24024;24025;24026;24027;24028;24029;24030;24103;24104;24105;24106;24107;24108;25397;25471;25472;25477;25657;25658;25659;26665;26666;30164;30165	1978;5388;5996;8111;8115;8117;8191;8221;8240;21704;22313;22348;22401;22904;24025;24030;24104;24106;25397;25471;25477;25658;26666;30164					+	-1;-1
Q9BTE3	Mini-chromosome maintenance complex-binding protein	MCMBP	sp|Q9BTE3|MCMBP_HUMAN Mini-chromosome maintenance complex-binding protein OS=Homo sapiens (Human) OX=9606 GN=MCMBP PE=1 SV=2	1	9	9	9	16.8	12.3	9.3	72.979	0	25.904	12307000	11896000	32	384590	371750	2783800	2223600	5	3	50	Q9BTE3	7	6	7	6	7	6	16.8	16.8	642	642	By MS/MS	By MS/MS	338	334;535;822;1207;1227;1356;1953;2992;3139	True;True;True;True;True;True;True;True;True	352;570;879;1282;1304;1450;2109;3232;3388	2594;2595;2596;2597;2598;2599;2600;2601;2602;4262;4263;4264;4265;4266;4267;4268;4269;4270;6461;6462;6463;9740;9741;9742;9743;9744;9745;9746;9747;9748;10091;10092;10093;10094;10095;10096;10097;10098;10099;10100;10101;10102;10103;10104;10105;10106;10107;10108;13144;13145;13146;13147;13148;13149;13150;13151;19405;19406;19407;19408;19409;27704;27705;27706;27707;27708;27709;27710;27711;27712;28722	2357;2358;2359;2360;2361;2362;3992;3993;3994;3995;3996;3997;3998;3999;4000;6527;6528;6529;9969;9970;9971;9972;9973;10444;10445;10446;10447;10448;10449;10450;10451;10452;10453;10454;10455;10456;14699;14700;14701;21225;21226;21227;29077;29078;29079;29080;29081;29082;29083;29084;30119	2362;3997;6528;9973;10451;14699;21225;29077;30119						-1
Q9H9A6	Leucine-rich repeat-containing protein 40	LRRC40	sp|Q9H9A6|LRC40_HUMAN Leucine-rich repeat-containing protein 40 OS=Homo sapiens (Human) OX=9606 GN=LRRC40 PE=1 SV=1	1	12	12	12	23.4	21.8	21.8	68.249	0	32.37	22285000	37383000	38	586440	983770	4777200	6130500	6	9	49	Q9H9A6	11	11	11	11	11	11	23.4	23.4	602	602	By MS/MS	By MS/MS	360	653;779;787;1022;1233;1255;1767;1770;2111;2508;2704;3065	True;True;True;True;True;True;True;True;True;True;True;True	693;833;841;1090;1311;1312;1339;1888;1891;2284;2708;2918;3310	5250;5251;5252;5253;5254;5255;5256;5257;5258;6144;6145;6146;6147;6148;6149;6150;6151;6152;6204;6205;6206;6207;6208;6209;6210;6211;6212;7987;7988;7989;7990;7991;7992;7993;7994;7995;10161;10162;10163;10164;10165;10166;10167;10168;10169;10170;10171;10172;10173;11451;11452;17043;17044;17045;17046;17047;17048;17049;17050;17051;17056;17057;17058;17059;17060;17061;17062;17063;17064;20660;20661;20662;206…	5040;5825;5826;5827;5828;5829;5830;5831;5832;5901;7788;7789;7790;7791;7792;7793;7794;7795;7796;10511;10512;10513;10514;12253;12254;18636;18637;18638;18639;18642;18643;18644;18645;18646;18647;18648;18649;22303;22304;22305;22306;22307;22308;22309;25186;26433;26434;29646;29647	5040;5827;5901;7788;10511;12253;18636;18645;22308;25186;26434;29646	316;317		385;450			-1
Q8TAA9	Vang-like protein 1	VANGL1	sp|Q8TAA9|VANG1_HUMAN Vang-like protein 1 OS=Homo sapiens (Human) OX=9606 GN=VANGL1 PE=1 SV=1	1	12	12	12	28.6	24	24.8	59.974	0	48.52	24117000	30073000	28	861310	1074000	7590200	8215400	5	7	47	Q8TAA9	10	10	10	10	10	10	28.6	28.6	524	524	By MS/MS	By MS/MS	300	22;195;208;389;466;510;832;1737;1849;2593;3039;3119	True;True;True;True;True;True;True;True;True;True;True;True	23;205;221;410;494;544;889;1857;1972;2799;3282;3366	147;148;149;150;151;152;1557;1667;1668;1669;1670;1671;1672;2965;2966;2967;2968;2969;2970;3705;3706;3707;3708;3709;3710;3711;3712;3713;3714;3715;3716;4085;4086;4087;4088;4089;6523;6524;6525;6526;6527;6528;6529;6530;6531;6532;6533;6534;16885;16886;16887;16888;16889;16890;17698;17699;17700;17701;17702;17703;24333;24334;24335;24336;24337;24338;27998;27999;28590;28591;28592;28593;28594;28595	102;103;104;105;106;1532;1624;1625;1626;1627;2665;2666;2667;2668;2669;2670;3433;3434;3435;3436;3827;3828;3829;3830;6560;6561;6562;6563;6564;6565;6566;18547;19271;19272;19273;19274;25652;25653;25654;25655;25656;29342;29343;29981;29982;29983;29984;29985;29986	104;1532;1627;2666;3433;3828;6564;18547;19274;25654;29342;29982	273		401			-1
P13797	Plastin-3	PLS3	sp|P13797|PLST_HUMAN Plastin-3 OS=Homo sapiens (Human) OX=9606 GN=PLS3 PE=1 SV=4	2	13	13	10	24.4	18.4	20.3	70.81	0	49.91	12256000	12979000	37	331250	350780	3173500	2346200	3	3	46	P13797;P13796	10	11	10	11	7	8	24.4	18.9	630	630;627	By MS/MS	By MS/MS	119	151;197;298;310;525;1153;1272;1799;1904;1956;2131;2414;3151	True;True;True;True;True;True;True;True;True;True;True;True;True	158;209;315;328;560;1226;1361;1920;2039;2112;2305;2603;3400	1137;1138;1139;1140;1141;1142;1143;1144;1576;1577;1578;1579;2387;2388;2389;2390;2391;2392;2393;2394;2449;2450;2451;2452;2453;2454;2455;2456;4201;4202;4203;8951;8952;8953;11626;11627;11628;11629;17355;17356;17357;17358;17359;17360;17361;17362;17363;18221;18222;18223;18224;18225;18226;18227;18228;18229;19421;19422;19423;19424;19425;19426;19427;19428;20767;20768;20769;20770;20771;20772;20773;20774;2…	1129;1130;1546;1547;1548;2238;2239;2267;2268;2269;2270;2271;2272;2273;2274;3933;8672;8673;12542;12543;18953;18954;18955;18956;19964;19965;19966;19967;21242;21243;22378;22379;22380;22381;22382;24005;24006;24007;24008;24009;24010;24011;24012;24013;30166;30167	1130;1547;2238;2271;3933;8672;12543;18954;19966;21243;22382;24011;30166	108;109		169;325			-1;-1
P52272	Heterogeneous nuclear ribonucleoprotein M	HNRNPM	sp|P52272|HNRPM_HUMAN Heterogeneous nuclear ribonucleoprotein M OS=Homo sapiens (Human) OX=9606 GN=HNRNPM PE=1 SV=3	1	14	14	14	23	20	22.1	77.515	0	33.252	31343000	58311000	47	666870	1240700	6959900	9263500	7	13	45	P52272	12	13	12	13	12	13	23	23	730	730	By MS/MS	By MS/MS	171	44;416;757;768;897;969;1606;1874;1893;1895;1897;2134;2912;2913	True;True;True;True;True;True;True;True;True;True;True;True;True;True	45;441;810;822;957;1031;1715;2000;2024;2026;2029;2308;3144;3145	259;260;261;262;263;264;265;266;267;3185;3186;3187;3188;3189;3190;3191;3192;5982;5983;5984;5985;5986;5987;5988;5989;6057;6058;6059;6060;6061;6062;6063;7107;7108;7109;7110;7111;7112;7113;7597;7598;7599;7600;7601;7602;7603;7604;7605;15638;15639;15640;15641;15642;15643;15644;15645;15646;17943;17944;18079;18080;18081;18082;18083;18084;18085;18086;18093;18094;18095;18132;18133;18134;18135;18136;18137;…	154;155;156;157;2812;2813;5680;5681;5682;5683;5743;5744;5745;7204;7205;7516;7517;7518;7519;7520;17394;17395;17396;17397;19527;19625;19628;19629;19710;22391;22392;28383;28384;28385;28386;28387;28388;28389;28390;28391;28392;28393;28394;28395;28396;28397	155;2812;5680;5743;7204;7520;17395;19527;19625;19628;19710;22391;28392;28395	185;186;187;188;189;190		367;369;457;465;607;611			-1
Q07065	Cytoskeleton-associated protein 4	CKAP4	sp|Q07065|CKAP4_HUMAN Cytoskeleton-associated protein 4 OS=Homo sapiens (Human) OX=9606 GN=CKAP4 PE=1 SV=2	1	19	19	19	38.2	18.4	18.9	66.022	0	256.18	13463000	16243000	38	354280	427440	3633800	3363600	3	3	45	Q07065	9	9	9	9	9	9	38.2	38.2	602	602	By MS/MS	By MS/MS	201	269;390;647;680;840;949;1112;1177;1509;1568;1761;2193;2209;2372;2561;2584;2624;2825;2972	True;True;True;True;True;True;True;True;True;True;True;True;True;True;True;True;True;True;True	283;411;687;724;898;1009;1183;1252;1612;1675;1881;2367;2384;2560;2766;2790;2831;3050;3212	2127;2128;2129;2971;2972;2973;5222;5223;5468;5469;5470;5471;5472;5473;5474;5475;6597;6598;6599;6600;6601;7476;7477;7478;7479;8576;8577;8578;8579;8580;8581;8582;8583;8584;8585;8586;9530;9531;9532;9533;9534;9535;9536;14923;14924;14925;14926;14927;14928;14929;14930;15392;15393;15394;17016;17017;17018;17019;17020;17021;21256;21257;21258;21259;21371;21372;21373;21374;21375;22502;22503;22504;22505;2250…	2033;2034;2671;5027;5266;5267;5268;6610;7413;7414;8216;8217;8218;8219;9801;9802;9803;9804;16895;16896;16897;17225;17226;18620;22831;22940;23794;23795;25470;25608;25609;25610;25611;25612;25876;25877;25878;25879;27490;27491;27492;28911;28912;28913;28914	2034;2671;5027;5268;6610;7413;8219;9802;16895;17226;18620;22831;22940;23795;25470;25609;25877;27492;28912						-1
P02533	Keratin, type I cytoskeletal 14	KRT14	sp|P02533|K1C14_HUMAN Keratin, type I cytoskeletal 14 OS=Homo sapiens GN=KRT14 PE=1 SV=4	11	17	13	3	34.7	24.4	28	51.561	0	78.033	18919000	20148000	29	652370	694770	6798700	4256600	4	3	43	P02533;CON__sp|P02533|K1C14_HUMAN;CON__sp|Q6IFX2|K1C42_MOUSE;P19012;CON__sp|P19012|K1C15_HUMAN;CON__sp|Q9Z2K1|K1C16_MOUSE;CON__tr|Q3ZAW8|Q3ZAW8_MOUSE;P35900;CON__tr|Q61782|Q61782_MOUSE;CON__sp|P35900|K1C20_HUMAN;CON__sp|Q9D312|K1C20_MOUSE	11	12	8	10	2	2	29.4	7.2	472	472;472;452;456;456;469;470;424;93;424;431	By MS/MS	By MS/MS	19	145;218;260;261;354;709;1004;1254;1311;1486;1527;1529;1971;2695;2758;2919;3003	True;True;True;True;True;True;True;True;True;False;False;False;True;True;True;True;False	152;232;274;275;372;759;1069;1337;1338;1401;1588;1632;1634;2128;2129;2909;2974;3151;3243;3244	1093;1094;1095;1096;1097;1098;1099;1100;1737;1738;1739;1740;1741;1742;1743;1744;1745;2069;2070;2071;2072;2073;2074;2075;2076;2077;2730;2731;2732;2733;2734;2735;2736;2737;5679;5680;5681;5682;5683;5684;5685;5686;7844;7845;7846;7847;7848;7849;11442;11443;11444;11445;11446;11447;11448;11449;11450;12259;12260;12261;12262;12263;12264;12265;14741;14742;14743;15071;15072;15073;15074;15075;15076;15077;150…	1081;1082;1083;1084;1085;1086;1699;1700;1701;1702;1703;1992;1993;1994;2460;2461;2462;2463;2464;2465;5455;5456;5457;5458;5459;7682;7683;7684;7685;7686;12251;12252;13456;13457;13458;13459;16704;16705;16706;16707;17027;17028;17029;17030;17031;17032;17036;17037;17038;17039;17040;17041;21363;21364;26391;26392;26650;28439;28440;29126;29127;29128;29129;29130;29131;29132;29133;29134;29135;29136;29137;291…	1086;1699;1993;1994;2463;5458;7682;12251;13456;16705;17029;17040;21364;26392;26650;28439;29152	9		119		+	-1;-1;-1;-1;-1;-1;-1;-1;-1;-1;-1
Q9P2I0	Cleavage and polyadenylation specificity factor subunit 2	CPSF2	sp|Q9P2I0|CPSF2_HUMAN Cleavage and polyadenylation specificity factor subunit 2 OS=Homo sapiens (Human) OX=9606 GN=CPSF2 PE=1 SV=2	1	18	18	18	27.1	0	0	88.486	0	88.146	0	0	43	0	0	0	0	0	0	43	Q9P2I0	0	0	0	0	0	0	27.1	27.1	782	782			380	326;424;617;785;811;854;913;1103;1226;1411;1610;1639;2018;2163;2192;2601;2778;3027	True;True;True;True;True;True;True;True;True;True;True;True;True;True;True;True;True;True	344;449;657;839;867;912;973;1173;1303;1508;1719;1750;2185;2337;2366;2807;2998;3270	2553;2554;2555;3238;3239;3240;5045;5046;5047;6190;6191;6192;6193;6194;6351;6352;6353;6681;6682;6683;7243;8495;8496;8497;10088;10089;10090;13676;13677;15661;15662;15877;15878;15879;19940;19941;19942;21106;21107;21108;21254;21255;24384;24385;24386;25548;25549;25550;25551;27914;27915;27916	2340;2860;2861;2862;2863;2864;2865;4909;4910;4911;5891;5892;5893;5997;5998;5999;6679;6680;6681;6682;7289;8161;8162;8163;10441;10442;10443;15233;15234;17405;17550;21693;21694;22763;22764;22765;22830;25695;25696;26745;29275;29276;29277;29278;29279	2340;2861;4909;5893;5997;6681;7289;8163;10441;15234;17405;17550;21694;22763;22830;25696;26745;29278	324;325		154;556			-1
P31948	Stress-induced-phosphoprotein 1	STIP1	sp|P31948|STIP1_HUMAN Stress-induced-phosphoprotein 1 OS=Homo sapiens (Human) OX=9606 GN=STIP1 PE=1 SV=1	1	28	28	28	43.1	0	2.4	62.639	0	84.715	0	755090	35	0	21574	0	50052	0	0	41	P31948	0	1	0	1	0	1	43.1	43.1	543	543		By matching	147	143;180;447;448;574;624;704;1063;1064;1065;1133;1134;1189;1357;1358;1359;1536;1557;1630;1702;1888;1889;1985;2032;2705;2786;2805;3107	True;True;True;True;True;True;True;True;True;True;True;True;True;True;True;True;True;True;True;True;True;True;True;True;True;True;True;True	150;189;475;476;612;664;754;1132;1133;1134;1205;1206;1264;1451;1452;1453;1641;1662;1739;1740;1818;1819;2017;2018;2144;2199;2919;3006;3029;3354	1086;1087;1464;3408;3409;3410;3411;3412;4773;4774;5087;5088;5662;5663;5664;5665;8284;8285;8286;8287;8288;8289;8727;8728;8729;9602;9603;9604;13152;13153;13154;13155;13156;13157;13158;15135;15136;15137;15138;15139;15301;15302;15806;15807;15808;16581;16582;16583;18032;18033;18034;18035;19640;19641;19642;19643;20001;20002;20003;20004;25149;25150;25151;25635;25636;26061;26062;28533;28534;28535;28536	1079;1455;2988;2989;2990;4656;4657;4941;4942;5443;5444;8003;8004;8005;8323;8324;9837;9838;14702;14703;14704;14705;17054;17055;17172;17173;17517;17518;18259;18260;19596;19597;21430;21431;21724;26435;26436;26918;27411;27412;29938;29939;29940	1079;1455;2988;2989;4656;4941;5443;8003;8004;8005;8323;8324;9837;14702;14703;14704;17054;17173;17518;18260;19596;19597;21430;21724;26435;26918;27411;29939	140;141;142;143		1;115;214;441			-1
P35637	RNA-binding protein FUS	FUS	sp|P35637|FUS_HUMAN RNA-binding protein FUS OS=Homo sapiens (Human) OX=9606 GN=FUS PE=1 SV=1	1	5	5	3	11.6	9.9	9.9	53.425	0	33.816	27873000	35336000	13	2144100	2718200	17193000	12784000	5	7	40	P35637	4	4	4	4	3	3	11.6	9.9	526	526	By MS/MS	By MS/MS	152	15;211;862;1647;2665	True;True;True;True;True	16;224;225;922;1758;2875	116;1691;1692;1693;1694;1695;1696;1697;1698;1699;1700;1701;1702;1703;1704;1705;1706;1707;1708;1709;1710;1711;1712;1713;1714;1715;1716;1717;6867;6868;6869;6870;6871;6872;6873;6874;6875;15974;15975;15976;15977;15978;15979;15980;15981;15982;24792;24793;24794;24795;24796;24797;24798	86;1656;1657;1658;1659;1660;1661;1662;1663;1664;1665;1666;1667;1668;1669;1670;1671;1672;1673;1674;7022;7023;7024;7025;7026;7027;7028;7029;7030;17718;17719;17720;17721;17722;17723;17724;26067;26068;26069;26070	86;1672;7024;17718;26068	149;150		321;464			-1
Q9C0J8	pre-mRNA 3 end processing protein WDR33	WDR33	sp|Q9C0J8|WDR33_HUMAN pre-mRNA 3 end processing protein WDR33 OS=Homo sapiens (Human) OX=9606 GN=WDR33 PE=1 SV=2	1	16	16	16	14.8	0.9	2.6	145.89	0	31.442	276590	689170	53	5218.7	13003	20597	31446	0	0	40	Q9C0J8	1	3	1	3	1	3	14.8	14.8	1336	1336	By matching	By matching	349	207;339;479;530;739;798;953;965;982;1380;2001;2255;2276;2277;2666;3159	True;True;True;True;True;True;True;True;True;True;True;True;True;True;True;True	220;357;509;565;791;854;1013;1026;1046;1475;2162;2433;2455;2456;2876;3409	1664;1665;1666;2622;2623;2624;3846;3847;3848;3849;3850;4243;4244;4245;5881;5882;5883;6290;6291;6292;7495;7496;7497;7558;7559;7560;7718;7719;7720;13323;13324;13325;13326;13327;13328;13329;13330;19754;19755;19756;21698;21699;21700;21701;21702;21703;21704;21705;21706;21707;21708;21709;21826;21827;21828;21829;21830;21831;24799;24800;24801;24802;24803;24804;24805;24806;24807;28835	1623;2373;3618;3619;3620;3621;3622;3982;3983;5607;5954;5955;7419;7457;7608;7609;7610;14826;14827;14828;14829;14830;21529;21530;21531;21532;23219;23220;23221;23222;23223;23224;23339;23340;26071;26072;26073;26074;26075;26076;30196	1623;2373;3618;3982;5607;5955;7419;7457;7608;14830;21529;23219;23339;23340;26072;30196	305;306		38;192			-1
P0CG48;P0CG47;P62979;P62987;A0A2R8Y422	Polyubiquitin-C;Ubiquitin;Polyubiquitin-B;Ubiquitin;Ubiquitin-40S ribosomal protein S27a;Ubiquitin;40S ribosomal protein S27a;Ubiquitin-60S ribosomal protein L40;Ubiquitin;60S ribosomal protein L40	UBC;UBB;RPS27A;UBA52	sp|P0CG48|UBC_HUMAN Polyubiquitin-C OS=Homo sapiens (Human) OX=9606 GN=UBC PE=1 SV=3;sp|P0CG47|UBB_HUMAN Polyubiquitin-B OS=Homo sapiens (Human) OX=9606 GN=UBB PE=1 SV=1;sp|P62979|RS27A_HUMAN Ubiquitin-40S ribosomal protein S27a OS=Homo sapiens (Human) OX=	5	4	4	4	61.8	61.8	61.8	77.038	0	83.044	42586000	88940000	44	967870	2021400	19925000	33762000	4	8	39	P0CG48;P0CG47;P62979;P62987;A0A2R8Y422	4	4	4	4	4	4	61.8	61.8	685	685;229;156;128;156	By MS/MS	By MS/MS	107	700;1281;2685;2712	True;True;True;True	750;1371;2897;2926	5626;5627;5628;5629;5630;5631;5632;5633;5634;11893;11894;11895;11896;11897;11898;11899;11900;11901;11902;11903;11904;11905;11906;11907;11908;11909;11910;11911;11912;11913;11914;24992;24993;24994;24995;24996;24997;24998;24999;25000;25176;25177;25178;25179;25180;25181;25182;25183;25184	5412;5413;5414;5415;5416;5417;5418;5419;5420;5421;13003;13004;13005;13006;13007;13008;13009;13010;13011;26321;26322;26323;26324;26325;26326;26327;26328;26329;26330;26331;26447;26448;26449;26450;26451;26452;26453;26454;26455	5414;13003;26321;26447						-1;-1;-1;-1;-1
P07437;Q9BVA1;Q13885;P04350	Tubulin beta chain;Tubulin beta-2B chain;Tubulin beta-2A chain;Tubulin beta-4A chain	TUBB;TUBB2B;TUBB2A;TUBB4A	sp|P07437|TBB5_HUMAN Tubulin beta chain OS=Homo sapiens (Human) OX=9606 GN=TUBB PE=1 SV=2;sp|Q9BVA1|TBB2B_HUMAN Tubulin beta-2B chain OS=Homo sapiens (Human) OX=9606 GN=TUBB2B PE=1 SV=1;sp|Q13885|TBB2A_HUMAN Tubulin beta-2A chain OS=Homo sapiens (Human) OX	9	11	11	2	32.2	30	27.9	49.67	0	11.286	12685000	20315000	20	634240	1015700	2841800	4277900	3	7	38	P07437;Q9BVA1;Q13885;P04350;Q13509;Q9BUF5;A6NNZ2;Q9H4B7;CON__tr|E1BJK2|E1BJK2_BOVIN	10	9	10	9	2	2	32.2	6.1	444	444;445;445;444;450;446;444;451;450	By MS/MS	By MS/MS	99	184;710;920;921;1268;1320;1535;1611;2054;2415;3121	True;True;True;True;True;True;True;True;True;True;True	193;760;980;981;1356;1410;1640;1720;2224;2604;3368	1492;1493;1494;1495;1496;1497;1498;1499;1500;5687;5688;5689;5690;5691;5692;5693;5694;7279;7280;7281;7282;7283;7284;7285;7286;7287;7288;7289;7290;7291;7292;11596;11597;11598;11599;11600;11601;11602;11603;12307;12308;12309;12310;12311;12312;12313;12314;12315;15129;15130;15131;15132;15133;15134;15663;15664;15665;15666;15667;15668;15669;15670;15671;20205;20206;20207;20208;20209;20210;20211;22808;2280…	1486;1487;5460;5461;5462;7300;7301;7302;7303;7304;7305;7306;7307;7308;7309;7310;7311;12532;12533;12534;12535;13493;13494;13495;13496;13497;13498;13499;17052;17053;17406;21892;21893;21894;21895;24014;24015;24016;24017;24018;24019;24020;24021;29988;29989	1487;5462;7302;7307;12535;13497;17052;17406;21895;24019;29988	71;72;73		164;257;330			-1;-1;-1;-1;-1;-1;-1;-1;-1
Q96EA4	Protein Spindly	SPDL1	sp|Q96EA4|SPDLY_HUMAN Protein Spindly OS=Homo sapiens (Human) OX=9606 GN=SPDL1 PE=1 SV=2	1	10	10	10	17.2	13.4	14.9	70.171	0	49.273	15240000	15179000	33	461810	459960	2973900	2543400	4	4	38	Q96EA4	8	8	8	8	8	8	17.2	17.2	605	605	By MS/MS	By MS/MS	318	534;592;971;972;1013;1628;1755;1882;2426;2776	True;True;True;True;True;True;True;True;True;True	569;631;1033;1034;1078;1737;1875;2011;2615;2996	4256;4257;4258;4259;4260;4261;4878;7615;7616;7617;7618;7619;7620;7621;7622;7623;7624;7625;7626;7896;7897;7898;7899;7900;15787;15788;15789;15790;15791;15792;16982;16983;16984;16985;16986;16987;17995;17996;17997;17998;17999;22872;22873;22874;22875;22876;22877;25533;25534;25535;25536;25537;25538	3988;3989;3990;3991;4756;7523;7524;7525;7526;7527;7528;7529;7728;7729;7730;7731;7732;17497;17498;17499;17500;17501;17502;17503;18591;19570;19571;19572;19573;19574;19575;24097;24098;24099;24100;24101;24102;26743	3988;4756;7524;7529;7730;17501;18591;19572;24099;26743	279;280		1;306			-1
P68363;Q9BQE3;Q71U36;P68366;P0DPH8;P0DPH7	Tubulin alpha-1B chain;Tubulin alpha-1C chain;Tubulin alpha-1A chain;Tubulin alpha-4A chain	TUBA1B;TUBA1C;TUBA1A;TUBA4A	sp|P68363|TBA1B_HUMAN Tubulin alpha-1B chain OS=Homo sapiens (Human) OX=9606 GN=TUBA1B PE=1 SV=1;sp|Q9BQE3|TBA1C_HUMAN Tubulin alpha-1C chain OS=Homo sapiens (Human) OX=9606 GN=TUBA1C PE=1 SV=1;sp|Q71U36|TBA1A_HUMAN Tubulin alpha-1A chain OS=Homo sapiens (	7	7	7	3	21.3	21.3	21.3	50.151	0	69.331	14764000	28178000	21	703030	1341800	4097200	7523000	4	7	37	P68363;Q9BQE3;Q71U36;P68366;P0DPH8;P0DPH7;Q9NY65	7	7	7	7	3	3	21.3	8.2	451	451;449;451;448;450;450;449	By MS/MS	By MS/MS	182	297;595;922;1996;2440;2681;2875	True;True;True;True;True;True;True	314;634;982;2156;2631;2892;3103	2369;2370;2371;2372;2373;2374;2375;2376;2377;2378;2379;2380;2381;2382;2383;2384;2385;2386;4891;4892;4893;4894;4895;4896;4897;4898;4899;7293;7294;7295;7296;7297;19715;19716;19717;19718;19719;19720;19721;19722;19723;23107;23108;23109;23110;23111;23112;23113;23114;23115;24946;24947;24948;24949;24950;24951;24952;24953;26707;26708;26709;26710;26711;26712;26713;26714	2228;2229;2230;2231;2232;2233;2234;2235;2236;2237;4768;4769;4770;4771;4772;4773;4774;7312;7313;7314;7315;21502;21503;21504;21505;24507;24508;26287;26288;26289;26290;26291;26292;26293;26294;28181;28182;28183;28184	2230;4773;7313;21502;24507;26293;28181						-1;-1;-1;-1;-1;-1;-1
Q06210	Glutamine--fructose-6-phosphate aminotransferase [isomerizing] 1	GFPT1	sp|Q06210|GFPT1_HUMAN Glutamine--fructose-6-phosphate aminotransferase [isomerizing] 1 OS=Homo sapiens (Human) OX=9606 GN=GFPT1 PE=1 SV=3	2	12	12	12	22.2	16.7	16.7	78.806	0	51.186	13736000	17348000	43	319440	403440	2815500	2590800	3	3	37	Q06210;O94808	9	9	9	9	9	9	22.2	22.2	699	699;682	By MS/MS	By MS/MS	198	594;698;703;716;1040;1041;1045;1531;1807;2585;2843;3046	True;True;True;True;True;True;True;True;True;True;True;True	633;748;753;766;1108;1109;1113;1636;1929;2791;3070;3071;3291	4888;4889;4890;5621;5622;5656;5657;5658;5659;5660;5661;5720;5721;5722;5723;5724;8112;8113;8114;8115;8116;8117;8118;8119;8120;8121;8122;8123;8124;8139;8140;8141;8142;8143;8144;15102;15103;15104;15105;15106;15107;17439;17440;17441;24279;24280;24281;24282;24283;24284;24285;26501;26502;26503;26504;26505;26506;26507;26508;26509;26510;26511;28116;28117;28118;28119;28120;28121	4766;4767;5407;5408;5437;5438;5439;5440;5441;5442;5480;5481;7890;7891;7892;7893;7894;7895;7896;7902;7903;17044;17045;17046;17047;19037;19038;25613;25614;25615;25616;25617;25618;28028;28029;28030;28031;28032;29594;29595;29596;29597	4766;5408;5441;5480;7890;7896;7903;17045;19038;25618;28031;29595	213;214	23	358;541	261		-1;-1
Q9H4A4	Aminopeptidase B	RNPEP	sp|Q9H4A4|AMPB_HUMAN Aminopeptidase B OS=Homo sapiens (Human) OX=9606 GN=RNPEP PE=1 SV=2	1	14	14	14	28.6	20.6	20.2	72.595	0	32.58	16863000	32402000	34	495980	952990	4393300	5321100	7	8	37	Q9H4A4	10	10	10	10	10	10	28.6	28.6	650	650	By MS/MS	By MS/MS	355	60;81;121;254;960;1418;1560;1772;2282;2316;2808;2868;2914;2915	True;True;True;True;True;True;True;True;True;True;True;True;True;True	64;87;128;268;1021;1515;1667;1893;2461;2501;3033;3096;3146;3147	403;404;405;406;407;408;409;410;570;571;572;573;574;575;576;577;578;914;2023;2024;2025;2026;2027;2028;7542;7543;7544;14186;14187;14188;14189;14190;15321;15322;15323;15324;15325;17073;17074;17075;17076;17077;17078;17079;17080;17081;21850;21851;21852;21853;21854;21855;21856;21857;21858;21859;22109;22110;22111;22112;22113;22114;26080;26081;26082;26083;26084;26085;26086;26087;26088;26653;26654;26655;…	472;617;618;619;620;933;1975;1976;7447;7448;16135;17186;17187;17188;18651;18652;23348;23349;23350;23351;23352;23508;27425;27426;27427;27428;27429;27430;27431;27432;28118;28398;28399;28400;28401;28402;28403;28404;28405;28406;28407;28408	472;617;933;1975;7448;16135;17186;18652;23352;23508;27428;28118;28400;28407						-1
Q9NVI7	ATPase family AAA domain-containing protein 3A	ATAD3A	sp|Q9NVI7|ATD3A_HUMAN ATPase family AAA domain-containing protein 3A OS=Homo sapiens (Human) OX=9606 GN=ATAD3A PE=1 SV=2	1	11	11	4	19.7	7.9	12.9	71.368	0	23.49	17492000	42002000	34	514470	1235300	7539100	10709000	2	5	37	Q9NVI7	5	8	5	8	1	2	19.7	9.3	634	634	By MS/MS	By MS/MS	370	69;280;943;1270;1335;1518;1688;1977;2186;2613;2971	True;True;True;True;True;True;True;True;True;True;True	74;295;1003;1358;1359;1428;1623;1802;2135;2360;2819;3211	471;2215;2216;2217;7436;7437;7438;7439;7440;7441;7442;7443;11611;11612;11613;11614;11615;11616;11617;11618;12985;12986;12987;12988;12989;12990;12991;12992;12993;15004;15005;15006;15007;15008;15009;15010;15011;16267;16268;16269;19581;21219;21220;21221;21222;21223;21224;21225;21226;21227;24455;24456;24457;24458;24459;24460;24461;24462;24463;27514;27515;27516;27517;27518;27519;27520;27521;27522	551;2110;2111;2112;7403;12537;12538;14586;14587;14588;14589;14590;14591;14592;14593;16963;16964;16965;17956;21396;22815;22816;22817;22818;22819;25761;25762;25763;25764;25765;25766;25767;28905;28906;28907;28908;28909;28910	551;2111;7403;12537;14587;16965;17956;21396;22817;25767;28909	320		518			-1
P46937	Transcriptional coactivator YAP1	YAP1	sp|P46937|YAP1_HUMAN Transcriptional coactivator YAP1 OS=Homo sapiens (Human) OX=9606 GN=YAP1 PE=1 SV=2	1	13	13	13	44.2	0	0	54.461	0	278.85	0	0	17	0	0	0	0	0	0	36	P46937	0	0	0	0	0	0	44.2	44.2	504	504			161	113;382;1428;1552;1650;1766;1978;2110;2531;2616;2724;2736;3084	True;True;True;True;True;True;True;True;True;True;True;True;True	120;400;401;1526;1657;1761;1886;1887;2136;2283;2732;2733;2823;2938;2939;2951;3330	834;835;836;2899;2900;2901;2902;2903;2904;14279;14280;14281;15264;15265;15266;15988;15989;15990;17037;17038;17039;17040;17041;17042;19582;19583;19584;20657;20658;20659;23833;23834;23835;23836;23837;24493;24494;24495;25241;25242;25243;25244;25245;25246;25310;25311;25312;28351;28352	857;858;859;2590;2591;2592;16187;16188;16189;17146;17728;17729;18631;18632;18633;18634;18635;21397;21398;21399;21400;21401;22300;22301;22302;25282;25283;25284;25285;25828;26489;26490;26491;26492;26493;26494;26560;29770;29771	858;2591;16187;17146;17729;18631;21397;22301;25283;25828;26492;26560;29771	173;174;175;176;177		313;370;377;404;423			-1
Q53GS9	U4/U6.U5 tri-snRNP-associated protein 2	USP39	sp|Q53GS9|SNUT2_HUMAN U4/U6.U5 tri-snRNP-associated protein 2 OS=Homo sapiens (Human) OX=9606 GN=USP39 PE=1 SV=2	1	15	15	15	32.9	5.8	5.8	65.38	0	133.28	993030	1808700	29	34242	62369	106520	137280	0	0	36	Q53GS9	3	3	3	3	3	3	32.9	32.9	565	565	By matching	By matching	250	114;309;459;527;684;687;725;1059;1730;2031;2063;2078;2283;2586;2689	True;True;True;True;True;True;True;True;True;True;True;True;True;True;True	121;327;487;562;732;736;737;776;1128;1849;2198;2234;2250;2462;2792;2901;2902	837;838;2446;2447;2448;3667;3668;3669;3670;3671;3672;4214;4215;4216;4217;4218;4219;4220;5549;5550;5551;5574;5575;5576;5577;5578;5579;5766;5767;5768;5769;5770;5771;5772;5773;5774;8257;8258;8259;16830;16831;16832;19997;19998;19999;20000;20278;20279;20280;20281;20282;20377;20378;20379;20380;20381;20382;20383;21860;21861;21862;24286;24287;24288;24289;24290;25032;25033;25034;25035;25036;25037	860;2265;2266;3403;3404;3405;3945;3946;3947;5354;5377;5378;5511;5512;5513;5514;5515;7981;18510;18511;21720;21721;21722;21723;21927;21928;21929;22009;22010;23353;25619;25620;26358;26359;26360;26361;26362;26363	860;2265;3405;3945;5354;5378;5512;7981;18510;21720;21929;22009;23353;25619;26361	254;255;256	34	270;299;353	82		-1
P01826	Ig heavy chain V-A1 region BS-5		sp|P01826|HV1A_RABIT Ig heavy chain V-A1 region BS-5 OS=Oryctolagus cuniculus PE=1 SV=1	1	3	3	3	8.7	8.7	8.7	18.256	0	2.7114	378640000	478840000	8	47329000	59855000	421310000	420100000	4	3	35	CON__sp|P01826|HV1A_RABIT	3	3	3	3	3	3	8.7	8.7	173	173	By MS/MS	By MS/MS	13	820;1001;2770	True;True;True	876;1066;2987	6424;6425;6426;6427;6428;6429;6430;6431;6432;7828;7829;7830;7831;7832;7833;7834;7835;25502;25503;25504;25505;25506;25507;25508;25509;25510	6452;6453;6454;6455;6456;7673;7674;7675;7676;7677;7678;26702;26703;26704;26705;26706;26707;26708;26709;26710;26711;26712;26713;26714;26715;26716;26717;26718;26719;26720;26721;26722;26723;26724;26725	6456;7676;26702					+	-1
Q9Y3Z3	Deoxynucleoside triphosphate triphosphohydrolase SAMHD1	SAMHD1	sp|Q9Y3Z3|SAMH1_HUMAN Deoxynucleoside triphosphate triphosphohydrolase SAMHD1 OS=Homo sapiens (Human) OX=9606 GN=SAMHD1 PE=1 SV=2	1	14	14	14	24.3	24.1	21.9	72.2	0	9.5353	38290000	48034000	35	1094000	1372400	8640600	9076300	7	12	35	Q9Y3Z3	13	13	13	13	13	13	24.3	24.3	626	626	By MS/MS	By MS/MS	398	40;41;366;732;756;773;1242;1312;1691;1966;2026;2389;2830;3155	True;True;True;True;True;True;True;True;True;True;True;True;True;True	41;42;384;784;809;827;1323;1402;1805;2122;2193;2577;3057;3404	246;247;248;249;250;2825;2826;2827;2828;5813;5814;5815;5816;5817;5818;5819;5820;5978;5979;5980;5981;6094;6095;6096;6097;6098;6099;6100;6101;6102;10571;10572;10573;10574;10575;10576;10577;10578;10579;12266;12267;12268;12269;12270;12271;16279;16280;16281;16282;16283;16284;16285;16286;16287;19483;19484;19485;19486;19487;19981;19982;19983;19984;19985;19986;19987;19988;22634;22635;22636;22637;22638;22…	147;148;149;2554;5545;5546;5678;5679;5766;5767;5768;5769;5770;5771;5772;11225;13460;13461;13462;13463;17964;21281;21715;23913;23914;23915;23916;23917;27947;30178;30179;30180;30181;30182;30183;30184;30185;30186	148;149;2554;5545;5679;5767;11225;13460;17964;21281;21715;23914;27947;30185	351		416			-1
Q16630	Cleavage and polyadenylation specificity factor subunit 6	CPSF6	sp|Q16630|CPSF6_HUMAN Cleavage and polyadenylation specificity factor subunit 6 OS=Homo sapiens (Human) OX=9606 GN=CPSF6 PE=1 SV=2	1	9	9	9	18.1	13.4	16	59.209	0	54.961	9018400	12796000	18	501020	710890	5494600	4564000	1	1	33	Q16630	5	6	5	6	5	6	18.1	18.1	551	551	By MS/MS	By MS/MS	238	623;836;869;870;986;2129;2246;2742;2928	True;True;True;True;True;True;True;True;True	663;893;929;930;1050;2303;2423;2957;2958;3160	5086;6560;6561;6562;6563;6564;6565;6566;6567;6568;6923;6924;6925;6926;6927;6928;6929;6930;6931;7739;7740;7741;7742;7743;7744;7745;7746;7747;20758;20759;20760;21626;21627;21628;21629;21630;21631;21632;21633;21634;25350;25351;25352;25353;25354;25355;25356;25357;25358;25359;25360;25361;25362;25363;25364;27145;27146;27147;27148;27149;27150;27151;27152;27153	4940;6580;6581;6582;6583;6584;6585;6586;6587;6588;7067;7068;7069;7070;7071;7072;7073;7074;7075;7076;7077;7622;7623;7624;22369;22370;22371;22372;23172;26587;26588;26589;26590;26591;26592;28524	4940;6580;7071;7076;7624;22372;23172;26589;28524	252;253		169;418			-1
Q7Z5L9	Interferon regulatory factor 2-binding protein 2	IRF2BP2	sp|Q7Z5L9|I2BP2_HUMAN Interferon regulatory factor 2-binding protein 2 OS=Homo sapiens (Human) OX=9606 GN=IRF2BP2 PE=1 SV=2	1	14	14	12	30.5	0	0	61.024	0	165	0	0	32	0	0	0	0	0	0	33	Q7Z5L9	0	0	0	0	0	0	30.5	26.1	587	587			278	6;213;361;410;475;611;977;1007;1563;2084;2194;2264;2273;3132	True;True;True;True;True;True;True;True;True;True;True;True;True;True	7;227;379;435;504;651;1041;1072;1670;2256;2368;2443;2452;3381	49;50;51;1721;1722;1723;2799;2800;2801;2802;3149;3150;3151;3795;3796;3797;5007;5008;5009;7696;7697;7698;7859;7860;7861;15354;15355;15356;20408;20409;20410;21260;21261;21262;21753;21754;21755;21810;21811;21812;28685;28686;28687	41;42;43;1676;1677;1678;2540;2541;2542;2795;2796;3495;3496;3497;4876;4877;7593;7594;7691;7692;7693;17212;22021;22022;22832;22833;23272;23273;23274;23331;23332;23333;30047;30048;30049;30050	41;1678;2541;2795;3497;4877;7593;7691;17212;22022;22832;23274;23332;30049		43		360		-1
P05787	Keratin, type II cytoskeletal 8	KRT8	sp|P05787|K2C8_HUMAN Keratin, type II cytoskeletal 8 OS=Homo sapiens GN=KRT8 PE=1 SV=7	7	22	16	15	38.9	30.8	38.5	53.704	0	22.615	15181000	88026000	29	523490	3035400	2291900	14930000	4	23	32	P05787;CON__sp|P05787|K2C8_HUMAN;P08729;Q9NSB2;CON__sp|Q9DCV7|K2C7_MOUSE;CON__sp|P08729|K2C7_HUMAN;CON__sp|Q9NSB2|KRT84_HUMAN	17	20	11	16	11	15	33.1	31.3	483	483;483;469;600;457;469;600	By MS/MS	By MS/MS	24	242;259;486;727;737;738;1569;1582;1738;1787;1851;1992;1993;2162;2468;2642;2643;2693;2880;3061;3076;3079	False;True;True;True;False;False;True;True;True;True;True;False;False;True;True;True;True;True;True;True;False;True	256;273;516;779;789;790;1676;1689;1858;1908;1974;2151;2152;2336;2663;2664;2849;2850;2851;2852;2906;2907;3109;3306;3322;3325	1912;1913;2061;2062;2063;2064;2065;2066;2067;2068;3883;3884;5780;5868;5869;5870;5871;5872;5873;5874;5875;5876;5877;5878;5879;5880;15395;15396;15397;15398;15399;15400;15401;15402;15486;16891;16892;16893;16894;16895;16896;16897;17195;17196;17197;17198;17199;17200;17201;17706;17707;17708;17709;19687;19688;19689;19690;19691;19692;19693;19694;19695;19696;19697;19698;19699;19700;19701;19702;19703;19704…	1857;1990;1991;3639;5519;5589;5590;5591;5592;5593;5594;5595;5596;5597;5598;5599;5600;5601;5602;5603;5604;5605;5606;17227;17228;17229;17230;17282;18548;18549;18718;18719;18720;19277;21459;21460;21461;21462;21463;21464;21465;21466;21467;21468;21469;21470;21471;21472;21473;21474;21475;21476;21477;21478;21479;21480;21481;21482;21483;21484;21485;21486;21487;21488;21489;21490;21491;21492;21493;21494;21…	1857;1990;3639;5519;5592;5604;17227;17282;18548;18718;19277;21459;21489;22762;25018;25943;25945;26387;28219;29638;29693;29737	17;18;19;20		189;256;406;409		+	-1;-1;-1;-1;-1;-1;-1
P14923	Junction plakoglobin	JUP	sp|P14923|PLAK_HUMAN Junction plakoglobin OS=Homo sapiens (Human) OX=9606 GN=JUP PE=1 SV=3	2	16	16	16	27.1	21.6	25.6	81.744	0	8.7349	18715000	42573000	46	406840	925510	4299000	6412100	4	13	32	P14923;P35222	13	15	13	15	13	15	27.1	27.1	745	745;781	By MS/MS	By MS/MS	122	99;718;1106;1126;1301;1499;1677;1678;1722;1847;1848;1957;2338;2723;2934;2994	True;True;True;True;True;True;True;True;True;True;True;True;True;True;True;True	106;769;1176;1198;1391;1602;1789;1790;1841;1970;1971;2113;2525;2937;3166;3234	755;756;757;758;759;760;761;762;5732;8522;8523;8524;8668;8669;8670;8671;8672;8673;8674;8675;12192;12193;12194;12195;12196;12197;12198;12199;12200;14853;14854;14855;14856;14857;14858;14859;14860;14861;14862;16188;16189;16190;16191;16192;16193;16194;16195;16196;16197;16198;16199;16200;16754;16755;16756;16757;16758;16759;16760;17682;17683;17684;17685;17686;17687;17688;17689;17690;17691;17692;17693;1…	811;5487;8183;8263;8264;8265;8266;13418;13419;13420;13421;13422;13423;13424;16856;16857;17871;17872;17873;17874;17875;17876;17877;18399;19268;19269;19270;21244;23657;26487;26488;28565;29086;29087	811;5487;8183;8263;13418;16857;17876;17877;18399;19268;19270;21244;23657;26487;28565;29087	110;111;112		4;193;354			-1;-1
Q16643	Drebrin	DBN1	sp|Q16643|DREB_HUMAN Drebrin OS=Homo sapiens (Human) OX=9606 GN=DBN1 PE=1 SV=4	1	13	13	13	17.7	17.7	17.7	71.428	0	185.32	21232000	48726000	27	786380	1804700	8176900	14479000	5	12	31	Q16643	11	13	11	13	11	13	17.7	17.7	649	649	By MS/MS	By MS/MS	239	110;673;674;685;1456;1457;1464;1488;1775;1806;2188;2189;2518	True;True;True;True;True;True;True;True;True;True;True;True;True	117;716;717;733;1557;1558;1565;1590;1896;1928;2362;2363;2719	819;820;821;822;823;824;825;826;5423;5424;5425;5426;5427;5428;5429;5430;5431;5552;5553;5554;5555;5556;5557;5558;14526;14527;14528;14529;14530;14583;14584;14585;14586;14587;14588;14589;14753;14754;14755;14756;14757;14758;14759;14760;14761;17098;17099;17100;17101;17102;17103;17104;17436;17437;17438;21236;21237;21238;21239;21240;21241;21242;23748;23749;23750;23751;23752;23753;23754	848;849;850;851;852;853;854;5239;5240;5241;5242;5243;5355;5356;16540;16541;16582;16712;16713;16714;16715;16716;16717;16718;16719;18656;19036;22821;22822;25214;25215;25216	848;5239;5240;5355;16540;16541;16582;16712;18656;19036;22821;22822;25214						-1
Q9P275	Ubiquitin carboxyl-terminal hydrolase 36	USP36	sp|Q9P275|UBP36_HUMAN Ubiquitin carboxyl-terminal hydrolase 36 OS=Homo sapiens (Human) OX=9606 GN=USP36 PE=1 SV=4	1	15	15	15	18.4	0	0	122.91	0	82.624	0	0	66	0	0	0	0	0	0	31	Q9P275	0	0	0	0	0	0	18.4	18.4	1123	1123			378	278;305;577;691;837;966;1436;1462;1764;1920;2279;2394;2644;2653;2761	True;True;True;True;True;True;True;True;True;True;True;True;True;True;True	292;323;615;741;894;1027;1535;1563;1884;2062;2458;2583;2853;2862;2977	2188;2189;2190;2424;2425;2426;4780;4781;4782;5592;5593;5594;6569;6570;6571;7561;7562;7563;14414;14415;14416;14417;14577;14578;14579;17026;17027;17028;18393;18394;18395;21837;21838;21839;22677;22678;22679;22680;22681;22682;24663;24664;24665;24714;24715;25456;25457	2085;2256;2257;4660;4661;5385;5386;5387;6589;6590;6591;7458;16451;16452;16453;16578;16579;16580;18624;18625;20118;20119;20120;23344;23345;23938;23939;23940;23941;25947;25981;25982;26664	2085;2257;4661;5385;6591;7458;16451;16580;18624;20118;23345;23941;25947;25982;26664	321;322		722;1049			-1
O76021	Ribosomal L1 domain-containing protein 1	RSL1D1	sp|O76021|RL1D1_HUMAN Ribosomal L1 domain-containing protein 1 OS=Homo sapiens (Human) OX=9606 GN=RSL1D1 PE=1 SV=3	1	21	21	21	39.6	4.3	15.3	54.972	0	61.956	1286900	3727500	22	58495	169430	584400	813260	0	1	30	O76021	3	8	3	8	3	8	39.6	39.6	490	490	By MS/MS	By MS/MS	73	8;170;282;376;377;600;1235;1366;1419;1455;1468;1470;1679;2331;2369;2370;2621;2734;2800;2801;2967	True;True;True;True;True;True;True;True;True;True;True;True;True;True;True;True;True;True;True;True;True	9;179;297;394;395;639;1314;1460;1516;1556;1569;1571;1791;2518;2557;2558;2828;2949;3024;3025;3207	55;56;57;58;59;60;61;62;63;64;65;66;1267;1268;2220;2221;2222;2881;2882;2883;4922;10178;10179;13187;13188;13189;13190;13191;14191;14192;14193;14194;14195;14196;14197;14198;14199;14517;14518;14519;14520;14521;14522;14523;14524;14525;14614;14615;14620;14621;14622;14623;14624;14625;16201;16202;16203;16204;16205;22250;22483;22484;24543;25301;25302;25303;25304;25305;25306;25307;26020;26021;26022;26023;…	47;48;49;1207;1208;2114;2584;2585;4784;10516;14727;14728;16136;16533;16534;16535;16536;16537;16538;16539;16597;16598;16601;17878;23607;23784;23785;25871;26558;27379;27380;28892	49;1207;2114;2584;2585;4784;10516;14727;16136;16537;16597;16601;17878;23607;23784;23785;25871;26558;27379;27380;28892		7		361		-1
Q14145	Kelch-like ECH-associated protein 1	KEAP1	sp|Q14145|KEAP1_HUMAN Kelch-like ECH-associated protein 1 OS=Homo sapiens (Human) OX=9606 GN=KEAP1 PE=1 SV=2	1	9	9	9	16.5	6.4	10.3	69.666	0	40.527	5619800	14120000	35	160560	403430	3316700	5098500	3	4	30	Q14145	4	6	4	6	4	6	16.5	16.5	624	624	By MS/MS	By MS/MS	219	75;835;1491;1636;1700;1720;1801;2410;3028	True;True;True;True;True;True;True;True;True	81;892;1593;1747;1815;1839;1922;2599;3271	522;523;524;525;526;527;528;529;530;531;532;533;534;535;6553;6554;6555;6556;6557;6558;6559;14779;14780;14781;15856;15857;15858;15859;15860;15861;15862;15863;16562;16563;16564;16565;16566;16567;16568;16746;16747;16748;16749;17365;17366;17367;22782;27917;27918;27919;27920;27921;27922;27923;27924	589;590;591;592;593;594;595;596;597;6579;16729;16730;16731;17537;17538;17539;17540;18244;18245;18246;18247;18396;18397;18958;18959;23993;29280;29281;29282;29283	594;6579;16730;17540;18247;18397;18959;23993;29281						-1
Q9NSD9	Phenylalanine--tRNA ligase beta subunit	FARSB	sp|Q9NSD9|SYFB_HUMAN Phenylalanine--tRNA ligase beta subunit OS=Homo sapiens (Human) OX=9606 GN=FARSB PE=1 SV=3	1	13	13	13	26.1	14.4	16.3	66.115	0	88.094	7215200	15482000	34	212210	455340	1446300	2876200	0	2	30	Q9NSD9	8	9	8	9	8	9	26.1	26.1	589	589	By MS/MS	By MS/MS	368	12;185;427;460;1294;1587;1608;1974;2024;2429;2777;2809;3074	True;True;True;True;True;True;True;True;True;True;True;True;True	13;194;452;488;1384;1694;1717;2132;2191;2618;2997;3034;3320	80;81;82;83;84;85;86;87;1501;3254;3255;3256;3257;3258;3259;3260;3261;3673;12154;12155;12156;12157;12158;12159;12160;12161;12162;15512;15513;15514;15515;15516;15517;15518;15519;15653;15654;15655;15656;19561;19562;19563;19564;19565;19566;19567;19974;19975;19976;19977;22885;22886;22887;22888;22889;22890;22891;22892;22893;22894;25539;25540;25541;25542;25543;25544;25545;25546;25547;26089;26090;26091;2…	55;56;57;58;1488;2868;2869;2870;2871;2872;3406;13393;13394;13395;13396;17298;17299;17401;21387;21388;21712;21713;24109;24110;24111;26744;27433;27434;27435;29676	56;1488;2870;3406;13394;17299;17401;21387;21713;24109;26744;27433;29676						-1
P57772	Selenocysteine-specific elongation factor	EEFSEC	sp|P57772|SELB_HUMAN Selenocysteine-specific elongation factor OS=Homo sapiens (Human) OX=9606 GN=EEFSEC PE=1 SV=4	1	12	12	12	21.6	9.1	8.6	65.304	0	19.517	4338100	5696900	29	149590	196440	1336600	1415500	0	0	29	P57772	5	5	5	5	5	5	21.6	21.6	596	596	By MS/MS	By matching	176	107;178;179;1154;1194;1500;1538;1544;1598;1856;2076;2891	True;True;True;True;True;True;True;True;True;True;True;True	114;187;188;1227;1269;1603;1643;1649;1706;1979;2248;3120	800;801;802;803;804;805;806;807;808;1449;1450;1451;1452;1453;1454;1455;1456;1457;1458;1459;1460;1461;1462;1463;8954;8955;8956;8957;9625;9626;14863;14864;14865;14866;14867;14868;15148;15149;15150;15151;15152;15153;15154;15197;15198;15199;15200;15201;15202;15203;15204;15205;15206;15207;15578;15579;15580;15581;15582;15583;17722;17723;17724;20355;20356;26832;26833;26834;26835	837;838;839;840;841;1449;1450;1451;1452;1453;1454;8674;9849;9850;16858;16859;16860;16861;17057;17058;17099;17100;17101;17102;17103;17362;17363;19284;21977;21978;28274	838;1450;1453;8674;9849;16861;17057;17102;17362;19284;21977;28274						-1
O14744	Protein arginine N-methyltransferase 5;Protein arginine N-methyltransferase 5, N-terminally processed	PRMT5	sp|O14744|ANM5_HUMAN Protein arginine N-methyltransferase 5 OS=Homo sapiens (Human) OX=9606 GN=PRMT5 PE=1 SV=4	1	9	9	9	15.7	13	10.2	72.683	0	16.967	10815000	7943300	32	337960	248230	2879000	2540100	2	2	28	O14744	8	6	8	6	8	6	15.7	15.7	637	637	By MS/MS	By MS/MS	56	16;17;23;372;430;499;564;2957;3147	True;True;True;True;True;True;True;True;True	17;18;24;390;455;531;602;3196;3396	117;118;119;120;121;122;123;124;125;126;127;128;129;130;131;132;133;134;153;154;155;156;157;2853;2854;2855;2856;2857;2858;2859;3267;3998;3999;4000;4001;4002;4003;4004;4005;4006;4720;4721;4722;4723;4724;4725;4726;27405;27406;27407;27408;27409;27410;27411;27412;28775;28776;28777;28778;28779;28780	87;88;89;90;91;92;93;94;95;107;108;2570;2571;2572;2573;2875;3751;3752;3753;3754;3755;4622;4623;4624;4625;4626;28721;30154;30155;30156;30157	91;94;107;2572;2875;3754;4625;28721;30156	58		4			-1
Q96IR2	Zinc finger protein 845	ZNF845	sp|Q96IR2|ZN845_HUMAN Zinc finger protein 845 OS=Homo sapiens (Human) OX=9606 GN=ZNF845 PE=1 SV=3	1	2	2	2	3.1	3.1	3.1	113.13	0	74.537	50448000	41728000	43	1173200	970420	44347000	28218000	5	5	28	Q96IR2	2	2	2	2	2	2	3.1	3.1	970	970	By MS/MS	By MS/MS	321	1616;1618	True;True	1725;1727	15692;15693;15694;15695;15696;15697;15707;15708;15709;15710;15711;15712;15713;15714;15715;15716;15717;15718;15719;15720;15721;15722;15723;15724	17415;17416;17417;17418;17419;17420;17426;17427;17428;17429;17430;17431;17432;17433;17434;17435;17436;17437;17438;17439;17440;17441;17442;17443;17444;17445;17446;17447;17448	17420;17440						-1
P46013	Antigen KI-67	MKI67	sp|P46013|KI67_HUMAN Proliferation marker protein Ki-67 OS=Homo sapiens (Human) OX=9606 GN=MKI67 PE=1 SV=2	1	12	12	12	6.2	5.3	5.3	358.69	0	12.582	12946000	17750000	179	72325	99164	3218000	3503100	2	4	27	P46013	10	10	10	10	10	10	6.2	6.2	3256	3256	By MS/MS	By MS/MS	160	34;86;144;192;222;223;413;1554;1979;2516;2517;2885	True;True;True;True;True;True;True;True;True;True;True;True	35;92;151;201;236;237;438;1659;2137;2717;2718;3114	203;204;205;603;604;605;606;607;608;1088;1089;1090;1091;1092;1543;1544;1545;1546;1547;1548;1779;1780;1781;1782;1783;1784;1785;1786;1787;1788;1789;1790;3164;3165;3166;3167;3168;15283;15284;15285;15286;15287;15288;19585;19586;19587;19588;23736;23737;23738;23739;23740;23741;23742;23743;23744;23745;23746;23747;26781;26782;26783;26784;26785;26786	131;635;636;637;638;1080;1522;1758;1759;1760;1761;2806;17162;17163;17164;17165;21402;25208;25209;25210;25211;25212;25213;28241;28242;28243;28244	131;635;1080;1522;1758;1761;2806;17163;21402;25208;25212;28242	172		1191			-1
P68104;Q5VTE0	Elongation factor 1-alpha 1;Putative elongation factor 1-alpha-like 3	EEF1A1;EEF1A1P5	sp|P68104|EF1A1_HUMAN Elongation factor 1-alpha 1 OS=Homo sapiens (Human) OX=9606 GN=EEF1A1 PE=1 SV=1;sp|Q5VTE0|EF1A3_HUMAN Putative elongation factor 1-alpha-like 3 OS=Homo sapiens (Human) OX=9606 GN=EEF1A1P5 PE=5 SV=1	3	6	6	6	23.8	23.8	23.8	50.14	0	21.737	9310400	13087000	21	443350	623170	3445300	3853900	3	4	27	P68104;Q5VTE0;Q05639	6	6	6	6	6	6	23.8	23.8	462	462;462;463	By MS/MS	By MS/MS	181	397;1187;2396;2581;2857;3161	True;True;True;True;True;True	418;1262;2585;2787;3085;3411	2998;2999;3000;3001;3002;3003;9587;9588;9589;9590;9591;9592;9593;9594;9595;22685;22686;22687;22688;22689;22690;22691;22692;24238;24239;24240;24241;24242;24243;24244;24245;24246;26587;26588;26589;26590;26591;26592;26593;26594;26595;28845;28846;28847;28848;28849;28850;28851;28852;28853	2682;2683;2684;9828;9829;9830;9831;9832;9833;9834;9835;23943;25589;25590;25591;25592;25593;25594;25595;28087;30203;30204;30205;30206;30207;30208;30209	2682;9830;23943;25591;28087;30208						-1;-1;-1
Q8IU81	Interferon regulatory factor 2-binding protein 1	IRF2BP1	sp|Q8IU81|I2BP1_HUMAN Interferon regulatory factor 2-binding protein 1 OS=Homo sapiens (Human) OX=9606 GN=IRF2BP1 PE=1 SV=1	1	14	14	14	28.9	1.2	1.2	61.687	0	46.417	6025800	6536000	36	167380	181560	3750700	2046800	1	0	27	Q8IU81	1	1	1	1	1	1	28.9	28.9	584	584	By MS/MS	By MS/MS	285	103;402;550;670;962;963;998;1132;1363;1728;1928;1942;2067;2092	True;True;True;True;True;True;True;True;True;True;True;True;True;True	110;423;588;713;1023;1024;1063;1204;1457;1847;2074;2097;2238;2264	776;777;778;779;3034;3035;3036;3037;3038;3039;3040;3041;3042;3043;3044;3045;4423;4424;4425;5405;5406;5407;7552;7553;7554;7555;7556;7810;7811;7812;8725;8726;13176;13177;13178;16818;16819;16820;18453;18454;19339;19340;20299;20300;20301;20543	826;827;828;2699;2700;2701;2702;2703;2704;4181;4182;5232;5233;7454;7455;7664;8322;14718;14719;14720;18504;18505;18506;18507;20157;20158;21144;21145;21936;21937;21938;21939;22169	828;2702;4181;5233;7454;7455;7664;8322;14720;18505;20158;21144;21937;22169	266	44	215	384		-1
P49748	Very long-chain specific acyl-CoA dehydrogenase, mitochondrial	ACADVL	sp|P49748|ACADV_HUMAN Very long-chain specific acyl-CoA dehydrogenase, mitochondrial OS=Homo sapiens (Human) OX=9606 GN=ACADVL PE=1 SV=1	1	10	10	10	17.4	12.2	14.5	70.389	0	78.963	4593000	10408000	41	112020	253850	1352300	1821900	1	2	26	P49748	7	8	7	8	7	8	17.4	17.4	655	655	By MS/MS	By MS/MS	166	153;263;646;877;928;934;1179;2373;2484;2960	True;True;True;True;True;True;True;True;True;True	160;277;686;937;988;994;1254;2561;2680;3199	1153;1154;1155;1156;1157;1158;1159;1160;2086;2087;2088;2089;2090;2091;2092;5219;5220;5221;6974;6975;6976;6977;6978;6979;6980;7331;7332;7333;7334;7335;7336;7337;7384;7385;7386;7387;7388;7389;7390;9544;9545;9546;9547;9548;9549;9550;22507;22508;23524;23525;23526;23527;23528;23529;23530;23531;23532;23533;27422;27423;27424;27425;27426	1138;1139;1140;1141;1998;1999;2000;5026;7110;7111;7339;7363;7364;9811;9812;9813;9814;23796;25113;25114;25115;25116;25117;28725;28726;28727	1139;1998;5026;7110;7339;7363;9814;23796;25115;28725						-1
Q02447	Transcription factor Sp3	SP3	sp|Q02447|SP3_HUMAN Transcription factor Sp3 OS=Homo sapiens (Human) OX=9606 GN=SP3 PE=1 SV=3	1	7	7	7	8.1	3.3	6.9	81.924	0	46.875	11923000	29792000	8	1490400	3724000	7107200	11558000	2	3	26	Q02447	3	6	3	6	3	6	8.1	8.1	781	781	By MS/MS	By MS/MS	191	825;926;1448;2142;2813;2977;2978	True;True;True;True;True;True;True	882;986;1549;2316;3038;3217;3218	6480;6481;6482;6483;7319;7320;7321;7322;7323;14492;14493;14494;20850;20851;20852;20853;26123;26124;26125;26126;26127;27577;27578;27579;27580;27581;27582;27583;27584;27585;27586;27587;27588;27589;27590;27591;27592;27593;27594;27595;27596;27597;27598	6533;7333;7334;7335;16518;22433;27450;27451;27452;28984;28985;28986;28987;28988;28989;28990;28991;28992;28993;28994;28995;28996;28997;28998;28999;29000;29001	6533;7335;16518;22433;27450;28985;28994						-1
Q86VP1	Tax1-binding protein 1	TAX1BP1	sp|Q86VP1|TAXB1_HUMAN Tax1-binding protein 1 OS=Homo sapiens (Human) OX=9606 GN=TAX1BP1 PE=1 SV=2	1	2	2	2	8.5	8.5	8.5	90.876	0	121.76	12312000	13590000	46	267650	295420	5080600	4558600	3	3	26	Q86VP1	2	2	2	2	2	2	8.5	8.5	789	789	By MS/MS	By MS/MS	282	1965;2943	True;True	2121;3179	19465;19466;19467;19468;19469;19470;19471;19472;19473;19474;19475;19476;19477;19478;19479;19480;19481;19482;27277;27278;27279;27280;27281;27282;27283;27284;27285;27286;27287;27288;27289;27290;27291;27292;27293	21269;21270;21271;21272;21273;21274;21275;21276;21277;21278;21279;21280;28633;28634;28635;28636;28637;28638;28639;28640;28641;28642;28643;28644;28645;28646	21271;28636						-1
Q9NUQ8	ATP-binding cassette sub-family F member 3	ABCF3	sp|Q9NUQ8|ABCF3_HUMAN ATP-binding cassette sub-family F member 3 OS=Homo sapiens (Human) OX=9606 GN=ABCF3 PE=1 SV=2	1	8	8	8	13.4	12	13.4	79.744	0	36.019	8869800	19423000	33	268780	588560	2845100	4539900	5	8	26	Q9NUQ8	7	8	7	8	7	8	13.4	13.4	709	709	By MS/MS	By MS/MS	369	63;164;268;640;1171;1675;1810;2764	True;True;True;True;True;True;True;True	68;172;282;680;1245;1786;1932;2980	432;433;434;435;436;437;438;439;1212;1213;1214;1215;1216;1217;1218;1219;2119;2120;2121;2122;2123;2124;2125;2126;5193;5194;5195;5196;5197;5198;9485;9486;9487;9488;9489;9490;9491;9492;16173;16174;16175;16176;16177;16178;16179;16180;16181;17464;25463;25464;25465;25466;25467;25468;25469	524;525;526;1171;1172;2026;2027;2028;2029;2030;2031;2032;5010;9765;9766;9767;9768;9769;9770;17859;17860;17861;17862;17863;19096;26671	524;1171;2027;5010;9768;17860;19096;26671						-1
O43900	Prickle-like protein 3	PRICKLE3	sp|O43900|PRIC3_HUMAN Prickle planar cell polarity protein 3 OS=Homo sapiens (Human) OX=9606 GN=PRICKLE3 PE=1 SV=2	1	7	7	7	16.4	16.4	16.4	68.608	0	7.6355	15009000	13485000	28	536020	481600	4928100	3335400	4	2	25	O43900	7	7	7	7	7	7	16.4	16.4	615	615	By MS/MS	By MS/MS	63	163;554;1027;1087;2148;2587;2986	True;True;True;True;True;True;True	171;592;1095;1156;2322;2793;3226	1206;1207;1208;1209;1210;1211;4442;4443;4444;4445;4446;4447;8026;8027;8028;8029;8030;8031;8412;8413;8414;8415;8416;8417;20892;20893;20894;20895;20896;20897;24291;24292;24293;24294;24295;27666;27667;27668;27669;27670;27671	1170;4189;4190;4191;4192;7809;7810;7811;7812;7813;8118;8119;8120;8121;8122;8123;22492;22493;22494;22495;22496;25621;29054;29055;29056	1170;4190;7810;8120;22492;25621;29055						-1
O95831	Apoptosis-inducing factor 1, mitochondrial	AIFM1	sp|O95831|AIFM1_HUMAN Apoptosis-inducing factor 1, mitochondrial OS=Homo sapiens (Human) OX=9606 GN=AIFM1 PE=1 SV=1	1	16	16	16	28.7	4.1	7.2	66.9	0	80.113	452430	2087400	31	14595	67335	47799	89896	0	0	25	O95831	2	4	2	4	2	4	28.7	28.7	613	613	By matching	By matching	78	21;158;393;649;1034;1220;1473;1710;2304;2318;2346;2657;2849;2929;2941;3031	True;True;True;True;True;True;True;True;True;True;True;True;True;True;True;True	22;165;414;689;1102;1297;1575;1829;2488;2503;2533;2866;3077;3161;3176;3177;3274	146;1177;1178;2981;2982;5231;5232;5233;8069;8070;10019;14641;14642;16668;16669;16670;16671;16672;21997;21998;21999;22123;22124;22125;22126;22127;22128;22351;22352;22353;22354;22355;22356;24735;24736;24737;24738;24739;24740;24741;26542;27154;27267;27268;27269;27270;27271;27272;27943;27944;27945	101;1151;1152;2674;2675;5029;7846;10377;16609;16610;18309;23433;23434;23435;23510;23511;23512;23513;23698;26015;28057;28525;28630;28631;29297	101;1151;2675;5029;7846;10377;16610;18309;23434;23510;23698;26015;28057;28525;28631;29297	65;66		171;364			-1
P19338	Nucleolin	NCL	sp|P19338|NUCL_HUMAN Nucleolin OS=Homo sapiens (Human) OX=9606 GN=NCL PE=1 SV=3	1	9	9	9	12.7	6.2	2	76.613	0	50.32	2484400	336220	35	70984	9606.3	1601000	171580	2	0	24	P19338	4	1	4	1	4	1	12.7	12.7	710	710	By MS/MS	By matching	129	150;523;712;876;1347;1952;2444;2637;3005	True;True;True;True;True;True;True;True;True	157;557;762;936;1441;2108;2635;2844;3246	1134;1135;1136;4184;5701;5702;5703;5704;6966;6967;6968;6969;6970;6971;6972;6973;13065;13066;13067;13068;13069;13070;13071;13072;13073;13074;19399;19400;19401;19402;19403;19404;23128;23129;23130;23131;23132;24622;24623;24624;24625;24626;24627;24628;27804;27805	1127;1128;3930;5468;7107;7108;7109;14638;14639;14640;14641;14642;14643;21221;21222;21223;21224;24518;24519;24520;25922;25923;25924;29184	1128;3930;5468;7108;14641;21223;24518;25924;29184						-1
Q16822	Phosphoenolpyruvate carboxykinase [GTP], mitochondrial	PCK2	sp|Q16822|PCKGM_HUMAN Phosphoenolpyruvate carboxykinase [GTP], mitochondrial OS=Homo sapiens (Human) OX=9606 GN=PCK2 PE=1 SV=4	2	9	9	9	17.3	11.7	7.7	70.698	0	51.989	4470200	4604200	36	124170	127890	1473000	1743400	2	1	23	Q16822;P35558	6	4	6	4	6	4	17.3	17.3	640	640;622	By MS/MS	By MS/MS	243	116;391;566;597;713;1607;2600;2700;2932	True;True;True;True;True;True;True;True;True	123;412;604;636;763;1716;2806;2914;3164	848;849;850;851;852;853;854;855;2974;4729;4730;4731;4732;4733;4734;4907;4908;4909;4910;5705;5706;5707;5708;15647;15648;15649;15650;15651;15652;24381;24382;24383;25111;25112;25113;27182;27183;27184;27185;27186;27187;27188	862;863;864;865;866;867;868;2672;4628;4629;4630;4779;4780;5469;5470;17398;17399;17400;25694;26402;28556;28557;28558	866;2672;4630;4779;5469;17398;25694;26402;28556						-1;-1
Q86YZ3	Hornerin	HRNR	sp|Q86YZ3|HORN_HUMAN Hornerin OS=Homo sapiens GN=HRNR PE=1 SV=2	2	7	7	7	11	10.8	9.4	282.39	0	29.457	7821200	7732300	85	92014	90968	4519900	2873300	4	2	22	Q86YZ3;CON__sp|Q86YZ3|HORN_HUMAN	6	5	6	5	6	5	11	11	2850	2850;2850	By MS/MS	By MS/MS	43	867;992;1082;1084;2196;2417;2566	True;True;True;True;True;True;True	927;1057;1151;1153;2370;2606;2771	6907;6908;6909;6910;6911;6912;6913;7776;7777;7778;7779;7780;7781;7782;7783;8392;8393;8394;8395;8396;8397;8398;8400;8401;8402;8403;8404;8405;8406;8407;8408;21277;21278;21279;21280;21281;21282;21283;21284;21285;22820;22821;24094;24095;24096;24097	7055;7056;7057;7058;7649;7650;7651;8109;8110;8112;8113;22851;22852;22853;22854;22855;22856;22857;24023;25478;25479;25480	7058;7651;8110;8113;22852;24023;25480					+	-1;-1
Q01844	RNA-binding protein EWS	EWSR1	sp|Q01844|EWS_HUMAN RNA-binding protein EWS OS=Homo sapiens (Human) OX=9606 GN=EWSR1 PE=1 SV=1	1	5	5	5	13.1	0	2.3	68.477	0	63.091	0	1346400	17	0	79198	0	281350	0	0	22	Q01844	0	1	0	1	0	1	13.1	13.1	656	656		By matching	188	33;851;898;2114;2664	True;True;True;True;True	34;909;958;2287;2288;2873;2874	196;197;198;199;200;201;202;6666;6667;6668;7114;7115;7116;20680;20681;20682;20683;20684;20685;24783;24784;24785;24786;24787;24788;24789;24790;24791	126;127;128;129;130;6667;6668;6669;6670;6671;6672;7206;7207;22314;22315;22316;22317;22318;26062;26063;26064;26065;26066	130;6671;7207;22316;26064	202;203;204		275;397;484			-1
Q8N1G4	Leucine-rich repeat-containing protein 47	LRRC47	sp|Q8N1G4|LRC47_HUMAN Leucine-rich repeat-containing protein 47 OS=Homo sapiens (Human) OX=9606 GN=LRRC47 PE=1 SV=1	1	11	11	11	23	10.8	4.8	63.472	0	40.427	3553800	658880	29	122550	22720	418250	71764	0	0	22	Q8N1G4	6	2	6	2	6	2	23	23	583	583	By matching	By matching	292	45;209;398;496;570;632;1609;1946;2168;2245;2609	True;True;True;True;True;True;True;True;True;True;True	46;222;419;528;608;672;1718;2102;2342;2422;2815	268;269;270;271;1673;1674;1675;3004;3005;3006;3007;3008;3009;3010;3980;3981;3982;3983;3984;3985;3986;3987;3988;3989;4754;4755;4756;4757;5133;5134;5135;15657;15658;15659;15660;19363;19364;21123;21124;21125;21622;21623;21624;21625;24442;24443;24444	158;159;1628;2685;2686;2687;3742;3743;3744;3745;4640;4641;4642;4962;4963;4964;17402;17403;17404;21202;21203;22776;23171;25755	158;1628;2685;3744;4642;4963;17403;21202;22776;23171;25755						-1
O43252	Bifunctional 3-phosphoadenosine 5-phosphosulfate synthase 1;Sulfate adenylyltransferase;Adenylyl-sulfate kinase	PAPSS1	sp|O43252|PAPS1_HUMAN Bifunctional 3-phosphoadenosine 5-phosphosulfate synthase 1 OS=Homo sapiens (Human) OX=9606 GN=PAPSS1 PE=1 SV=2	2	9	9	9	18.9	14.9	10.9	70.832	0	20.045	8015100	4073100	33	242880	123430	3178200	942710	2	0	21	O43252;O95340	7	5	7	5	7	5	18.9	18.9	624	624;614	By MS/MS	By matching	61	283;414;849;881;1931;1999;2022;2290;2629	True;True;True;True;True;True;True;True;True	298;439;907;941;2078;2160;2189;2470;2836	2223;2224;2225;2226;2227;2228;2229;2230;2231;3169;3170;3171;3172;3173;3174;3175;3176;3177;6659;6660;6661;6662;6663;6664;7002;7003;7004;7005;7006;18476;18477;18478;18479;19746;19747;19748;19749;19750;19751;19752;19961;19962;19963;19964;21895;21896;21897;21898;21899;24589;24590;24591	2115;2116;2117;2118;2807;2808;2809;2810;6663;6664;6665;7136;20164;20165;21526;21527;21705;23374;23375;25897;25898;25899	2116;2809;6663;7136;20165;21526;21705;23375;25898	61		511			-1;-1
O75746	Calcium-binding mitochondrial carrier protein Aralar1	SLC25A12	sp|O75746|CMC1_HUMAN Calcium-binding mitochondrial carrier protein Aralar1 OS=Homo sapiens (Human) OX=9606 GN=SLC25A12 PE=1 SV=2	1	7	7	4	11.1	9.1	11.1	74.761	0	7.7198	10007000	13141000	37	270470	355160	3643900	3474000	1	2	21	O75746	6	7	6	7	3	4	11.1	6.8	678	678	By MS/MS	By MS/MS	72	1345;1530;1771;1819;1826;3081;3112	True;True;True;True;True;True;True	1439;1635;1892;1942;1949;3327;3359	13053;13054;13055;13056;13057;13058;13059;13060;13061;15093;15094;15095;15096;15097;15098;15099;15100;15101;17065;17066;17067;17068;17069;17070;17071;17072;17510;17511;17512;17513;17514;17515;17516;17550;17551;17552;17553;17554;17555;17556;17557;17558;28332;28333;28334;28335;28336;28337;28338;28339;28340;28551;28552;28553;28554;28555;28556;28557;28558	14633;14634;17042;17043;18650;19117;19134;19135;19136;19137;19138;29749;29750;29751;29752;29753;29754;29755;29951;29952;29953	14633;17043;18650;19117;19138;29749;29952						-1
P0C0L5;P0C0L4	Complement C4-B;Complement C4 beta chain;Complement C4-B alpha chain;C4a anaphylatoxin;C4b-B;C4d-B;Complement C4 gamma chain;Complement C4-A;Complement C4 beta chain;Complement C4-A alpha chain;C4a anaphylatoxin;C4b-A;C4d-A;Complement C4 gamma chain	C4B;C4A	sp|P0C0L5|CO4B_HUMAN Complement C4-B OS=Homo sapiens (Human) OX=9606 GN=C4B_2 PE=1 SV=2;sp|P0C0L4|CO4A_HUMAN Complement C4-A OS=Homo sapiens (Human) OX=9606 GN=C4A PE=1 SV=2	2	4	4	4	3.6	3.6	2.6	192.75	0	35.914	61789000	67626000	81	762830	834890	42216000	26935000	3	2	21	P0C0L5;P0C0L4	4	3	4	3	4	3	3.6	3.6	1744	1744;1744	By MS/MS	By MS/MS	106	251;401;2933;3110	True;True;True;True	265;422;3165;3357	2001;2002;2003;2004;2005;2006;2007;2008;3027;3028;3029;3030;3031;3032;3033;27189;27190;27191;27192;27193;27194;27195;27196;27197;28543;28544;28545;28546	1967;1968;1969;1970;1971;2692;2693;2694;2695;2696;2697;2698;28559;28560;28561;28562;28563;28564;29946;29947;29948;29949	1971;2694;28562;29947						-1;-1
P24534	Elongation factor 1-beta	EEF1B2	sp|P24534|EF1B_HUMAN Elongation factor 1-beta OS=Homo sapiens (Human) OX=9606 GN=EEF1B2 PE=1 SV=3	1	2	2	2	20.9	14.2	20.9	24.763	0	39.547	1057500	2351100	12	88124	195930	1346900	1249400	1	3	21	P24534	1	2	1	2	1	2	20.9	20.9	225	225	By MS/MS	By MS/MS	137	2510;2597	True;True	2710;2803	23685;23686;23687;23688;23689;23690;23691;24359;24360;24361;24362;24363;24364;24365;24366;24367;24368;24369;24370;24371;24372	25188;25189;25190;25191;25674;25675;25676;25677;25678;25679;25680;25681;25682;25683;25684;25685;25686;25687;25688;25689;25690	25188;25686						-1
Q7Z5J4	Retinoic acid-induced protein 1	RAI1	sp|Q7Z5J4|RAI1_HUMAN Retinoic acid-induced protein 1 OS=Homo sapiens (Human) OX=9606 GN=RAI1 PE=1 SV=2	1	10	10	10	7.8	0	0	203.35	0	179.46	0	0	87	0	0	0	0	0	0	21	Q7Z5J4	0	0	0	0	0	0	7.8	7.8	1906	1906			277	172;1088;2082;2179;2230;2357;2675;2738;2973;3072	True;True;True;True;True;True;True;True;True;True	181;1157;2254;2353;2407;2545;2885;2953;3213;3318	1278;1279;1280;8418;8419;8420;20402;20403;20404;21179;21180;21181;21533;21534;21535;22418;22419;24903;24904;25322;25323;25324;27531;27532;27533;27534;27535;27536;28263;28264;28265	1223;1224;1225;8124;8125;22017;22018;22796;23097;23098;23747;26248;26566;26567;26568;28915;28916;28917;28918;28919;29674	1223;8124;22017;22796;23098;23747;26248;26566;28919;29674						-1
O60563	Cyclin-T1	CCNT1	sp|O60563|CCNT1_HUMAN Cyclin-T1 OS=Homo sapiens (Human) OX=9606 GN=CCNT1 PE=1 SV=1	1	8	8	8	13.1	13.1	13.1	80.684	0	3.1499	5914300	9709000	26	227470	373420	1044300	3069100	2	6	20	O60563	8	8	8	8	8	8	13.1	13.1	726	726	By MS/MS	By MS/MS	66	32;669;769;1056;1118;1461;1577;2886	True;True;True;True;True;True;True;True	33;712;823;1125;1190;1562;1684;3115	190;191;192;193;194;195;5399;5400;5401;5402;5403;5404;6064;6065;6066;6067;6068;6069;6070;6071;8238;8239;8240;8241;8242;8243;8606;8607;8608;8609;8610;8611;8612;8613;8614;14571;14572;14573;14574;14575;14576;15449;15450;15451;15452;15453;15454;26787;26788;26789;26790;26791;26792	123;124;125;5231;5746;5747;5748;5749;7969;7970;7971;8235;8236;8237;8238;16577;17270;28245;28246;28247;28248	124;5231;5749;7971;8235;16577;17270;28248						-1
Q5T9A4	ATPase family AAA domain-containing protein 3B	ATAD3B	sp|Q5T9A4|ATD3B_HUMAN ATPase family AAA domain-containing protein 3B OS=Homo sapiens (Human) OX=9606 GN=ATAD3B PE=1 SV=1	1	10	4	1	16.8	14	15.3	72.572	0	12.057	11661000	13620000	34	342970	400600	5769500	6309400	2	4	20	Q5T9A4	8	9	4	4	1	1	8	1.9	648	648	By MS/MS	By MS/MS	257	69;943;1092;1335;1518;1646;1689;2085;2186;2613	False;False;True;False;False;True;True;True;False;False	74;1003;1161;1428;1623;1757;1803;2257;2360;2819	471;7436;7437;7438;7439;7440;7441;7442;7443;8426;8427;8428;8429;8430;8431;8432;12985;12986;12987;12988;12989;12990;12991;12992;12993;15004;15005;15006;15007;15008;15009;15010;15011;15958;15959;15960;15961;15962;15963;15964;15965;15966;15967;15968;15969;15970;15971;15972;15973;16270;16271;16272;16273;20411;20412;20413;20414;20415;20416;20417;20418;20419;21219;21220;21221;21222;21223;21224;21225;21…	551;7403;8130;8131;14586;14587;14588;14589;14590;14591;14592;14593;16963;16964;16965;17709;17710;17711;17712;17713;17714;17715;17716;17717;17957;22023;22024;22025;22026;22027;22028;22029;22030;22031;22815;22816;22817;22818;22819;25761;25762;25763;25764;25765;25766;25767	551;7403;8130;14587;16965;17714;17957;22030;22817;25767						-1
Q8IV04	Carabin	TBC1D10C	sp|Q8IV04|TB10C_HUMAN Carabin OS=Homo sapiens (Human) OX=9606 GN=TBC1D10C PE=1 SV=1	1	1	1	1	2	2	2	49.712	0	1.2708	120980000	211990000	21	5760900	10095000	157800000	211990000	2	3	20	Q8IV04	1	1	1	1	1	1	2	2	446	446	By MS/MS	By MS/MS	286	1508	TRUE	1611	14914;14915;14916;14917;14918;14919;14920;14921;14922	16875;16876;16877;16878;16879;16880;16881;16882;16883;16884;16885;16886;16887;16888;16889;16890;16891;16892;16893;16894	16888						-1
Q9H981	Actin-related protein 8	ACTR8	sp|Q9H981|ARP8_HUMAN Actin-related protein 8 OS=Homo sapiens (Human) OX=9606 GN=ACTR8 PE=1 SV=2	1	10	10	10	16.7	10.3	10.1	70.483	0	3.396	6063500	9450400	29	209090	325880	2287000	3084500	1	2	20	Q9H981	6	6	6	6	6	6	16.7	16.7	624	624	By MS/MS	By MS/MS	359	224;325;573;994;1096;1216;1537;1929;2262;2342	True;True;True;True;True;True;True;True;True;True	238;343;611;1059;1166;1293;1642;2075;2441;2529	1791;1792;1793;1794;1795;1796;1797;2548;2549;2550;2551;2552;4770;4771;4772;7785;7786;7787;7788;7789;7790;7791;7792;7793;8443;8444;8445;9834;9835;9836;9837;9838;9839;9840;9841;9842;15140;15141;15142;15143;15144;15145;15146;15147;18455;18456;18457;21744;22323;22324;22325;22326;22327;22328;22329;22330;22331	1762;2338;2339;4653;4654;4655;7653;8138;10011;10012;10013;10014;10015;10016;10017;17056;20159;20160;23268;23687	1762;2338;4655;7653;8138;10012;17056;20159;23268;23687						-1
Q9NPI6	mRNA-decapping enzyme 1A	DCP1A	sp|Q9NPI6|DCP1A_HUMAN mRNA-decapping enzyme 1A OS=Homo sapiens (Human) OX=9606 GN=DCP1A PE=1 SV=3	1	6	6	6	17.2	12.7	9.1	63.278	0	8.4518	8307700	10118000	23	361200	439910	5230300	5504900	3	4	20	Q9NPI6	5	4	5	4	5	4	17.2	17.2	582	582	By MS/MS	By MS/MS	362	212;845;1365;2344;2532;2631	True;True;True;True;True;True	226;903;1459;2531;2734;2838	1718;1719;1720;6625;6626;6627;13181;13182;13183;13184;13185;13186;22335;22336;22337;22338;22339;22340;22341;22342;22343;23838;23839;23840;23841;23842;23843;23844;23845;23846;24601;24602;24603;24604;24605;24606;24607;24608	1675;6619;14723;14724;14725;14726;23689;23690;23691;23692;23693;23694;25286;25287;25288;25289;25290;25910;25911;25912;25913;25914	1675;6619;14725;23690;25290;25914	318		417			-1
Q9Y5A9	YTH domain-containing family protein 2	YTHDF2	sp|Q9Y5A9|YTHD2_HUMAN YTH domain-containing family protein 2 OS=Homo sapiens (Human) OX=9606 GN=YTHDF2 PE=1 SV=2	1	9	9	7	17.8	7.6	17.8	62.333	0	136.24	2010900	31839000	20	100540	1592000	862570	8544800	0	7	20	Q9Y5A9	4	9	4	9	4	7	17.8	14.7	579	579	By matching	By MS/MS	400	395;480;1125;1575;1605;2292;2345;2437;2603	True;True;True;True;True;True;True;True;True	416;510;1197;1682;1714;2472;2532;2628;2809	2989;2990;3851;3852;3853;8661;8662;8663;8664;8665;8666;8667;15438;15439;15440;15632;15633;15634;15635;15636;15637;21906;21907;21908;21909;21910;21911;21912;21913;22344;22345;22346;22347;22348;22349;22350;23081;23082;23083;23084;23085;23086;24390;24391;24392	2680;3623;3624;3625;8261;8262;17259;17260;17261;17392;17393;23381;23382;23383;23695;23696;23697;24497;25700;25701;25702	2680;3625;8262;17260;17393;23383;23696;24497;25700						-1
P02545	Prelamin-A/C;Lamin-A/C	LMNA	sp|P02545|LMNA_HUMAN Prelamin-A/C OS=Homo sapiens (Human) OX=9606 GN=LMNA PE=1 SV=1	1	9	9	9	14.9	9.6	14.9	74.139	0	8.3495	6295100	26229000	41	153540	639730	1926400	4540100	1	6	19	P02545	6	9	6	9	6	9	14.9	14.9	664	664	By MS/MS	By MS/MS	86	230;509;1324;1490;1638;2395;2545;2698;2827	True;True;True;True;True;True;True;True;True	244;543;1417;1592;1749;2584;2749;2912;3052	1834;1835;1836;1837;1838;1839;1840;4078;4079;4080;4081;4082;4083;4084;12417;12418;14771;14772;14773;14774;14775;14776;14777;14778;15873;15874;15875;15876;22683;22684;23967;23968;23969;23970;23971;23972;25101;25102;25103;25104;25105;25106;25107;25108;26248;26249;26250;26251;26252;26253;26254;26255	1790;1791;1792;1793;1794;1795;1796;3825;3826;13704;16726;16727;16728;17549;23942;25396;26398;26399;27647;27648	1790;3826;13704;16726;17549;23942;25396;26398;27647						-1
Q8NA72	Centrosomal protein POC5	POC5	sp|Q8NA72|POC5_HUMAN Centrosomal protein POC5 OS=Homo sapiens (Human) OX=9606 GN=POC5 PE=1 SV=2	1	11	11	11	25	23.1	23.5	63.351	0	103.68	20490000	34709000	26	788090	1335000	6272000	12032000	5	12	19	Q8NA72	10	10	10	10	10	10	25	25	575	575	By MS/MS	By MS/MS	295	248;848;1314;1370;1887;1951;2158;2336;2682;2728;2820	True;True;True;True;True;True;True;True;True;True;True	262;906;1404;1464;2016;2107;2332;2523;2893;2943;3045	1976;6658;12273;12274;12275;12276;12277;13226;13227;13228;18030;18031;19396;19397;19398;21095;21096;21097;21098;22282;22283;22284;22285;22286;22287;22288;22289;22290;24954;24955;24956;24957;24958;24959;24960;24961;24962;24963;24964;25279;25280;25281;25282;25283;25284;25285;26154;26155;26156	1949;6662;13465;13466;13467;14763;19595;21220;22758;23650;23651;23652;26295;26296;26297;26298;26299;26545;27465	1949;6662;13465;14763;19595;21220;22758;23651;26295;26545;27465	269;270		159;325			-1
Q8TCJ2	Dolichyl-diphosphooligosaccharide--protein glycosyltransferase subunit STT3B	STT3B	sp|Q8TCJ2|STT3B_HUMAN Dolichyl-diphosphooligosaccharide--protein glycosyltransferase subunit STT3B OS=Homo sapiens (Human) OX=9606 GN=STT3B PE=1 SV=1	1	5	5	5	7	4.1	7	93.673	0	24.475	4090900	9855400	34	120320	289860	2247600	3055700	2	2	19	Q8TCJ2	3	5	3	5	3	5	7	7	826	826	By MS/MS	By MS/MS	303	109;761;834;1097;1137	True;True;True;True;True	116;815;891;1167;1209	814;815;816;817;818;6019;6020;6021;6022;6023;6024;6025;6026;6027;6544;6545;6546;6547;6548;6549;6550;6551;6552;8446;8447;8448;8449;8450;8451;8452;8453;8738;8739;8740;8741	846;847;5722;5723;5724;5725;5726;5727;5728;5729;6572;6573;6574;6575;6576;6577;6578;8139;8331	846;5727;6576;8139;8331	274		728			-1
Q15637	Splicing factor 1	SF1	sp|Q15637|SF01_HUMAN Splicing factor 1 OS=Homo sapiens (Human) OX=9606 GN=SF1 PE=1 SV=4	1	6	6	6	11.7	10	10	68.329	0	8.159	9883800	14575000	16	617740	910940	4718600	5348400	2	3	18	Q15637	5	5	5	5	5	5	11.7	11.7	639	639	By MS/MS	By MS/MS	233	277;322;802;1257;2136;2449	True;True;True;True;True;True	291;340;858;1341;2310;2642	2185;2186;2187;2535;2536;2537;2538;2539;6301;6302;6303;6304;6305;6306;6307;6308;6309;11454;20799;20800;20801;20802;20803;20804;20805;20806;23271;23272;23273;23274;23275;23276;23277;23278;23279	2084;2335;5959;5960;5961;5962;5963;5964;12256;22397;22398;22399;24854;24855;24856;24857;24858;24859;24860	2084;2335;5961;12256;22397;24860						-1
Q6PI48	Aspartate--tRNA ligase, mitochondrial	DARS2	sp|Q6PI48|SYDM_HUMAN Aspartate--tRNA ligase, mitochondrial OS=Homo sapiens (Human) OX=9606 GN=DARS2 PE=1 SV=1	1	10	10	10	16.7	10.1	11.8	73.562	0	7.3533	5606700	10213000	35	160190	291790	1894800	2222400	0	0	18	Q6PI48	6	8	6	8	6	8	16.7	16.7	645	645	By MS/MS	By MS/MS	267	115;1195;1213;1275;1562;1623;1778;1960;2061;2611	True;True;True;True;True;True;True;True;True;True	122;1270;1290;1364;1669;1732;1899;2116;2231;2817	839;840;841;842;843;844;845;846;847;9627;9628;9629;9630;9631;9632;9633;9634;9821;9822;9823;9824;9825;9826;9827;9828;9829;11642;11643;11644;11645;11646;11647;11648;11649;11650;15345;15346;15347;15348;15349;15350;15351;15352;15353;15750;15751;17122;17123;17124;17125;17126;17127;17128;19442;19443;19444;20261;20262;20263;20264;20265;20266;20267;20268;24446;24447;24448;24449;24450;24451;24452;24453	861;9851;10008;12546;17211;17472;17473;18662;18663;18664;21247;21248;21921;21922;21923;25757;25758;25759	861;9851;10008;12546;17211;17472;18662;21247;21921;25757						-1
Q9UG63	ATP-binding cassette sub-family F member 2	ABCF2	sp|Q9UG63|ABCF2_HUMAN ATP-binding cassette sub-family F member 2 OS=Homo sapiens (Human) OX=9606 GN=ABCF2 PE=1 SV=2	1	6	6	6	10.6	9.1	10.6	71.289	0	14.418	7036500	8693000	33	213230	263430	3201400	2335900	3	2	18	Q9UG63	5	6	5	6	5	6	10.6	10.6	623	623	By MS/MS	By MS/MS	383	1501;1564;1693;1832;1913;3160	True;True;True;True;True;True	1604;1671;1808;1955;2053;3410	14869;14870;14871;14872;14873;14874;14875;14876;14877;14878;14879;14880;14881;14882;15357;15358;15359;15360;15361;15362;15363;16313;16314;16315;16316;16317;16318;16319;16320;16321;17573;17574;17575;17576;17577;17578;17579;18340;18341;18342;28836;28837;28838;28839;28840;28841;28842;28843;28844	16862;16863;16864;16865;17213;17214;18000;18001;18002;18003;19144;19145;20089;30197;30198;30199;30200;30201;30202	16862;17214;18001;19144;20089;30200	328;329		206;453			-1
O94826	Mitochondrial import receptor subunit TOM70	TOMM70A	sp|O94826|TOM70_HUMAN Mitochondrial import receptor subunit TOM70 OS=Homo sapiens (Human) OX=9606 GN=TOMM70 PE=1 SV=1	1	10	10	10	21.9	10.7	7.1	67.454	0	48.034	5801900	2266300	31	187160	73105	1550000	667110	1	0	17	O94826	6	4	6	4	6	4	21.9	21.9	608	608	By MS/MS	By matching	75	3;30;324;874;954;1779;2068;2360;3056;3124	True;True;True;True;True;True;True;True;True;True	3;31;342;934;1014;1900;2239;2548;3301;3372	18;19;20;21;22;23;24;185;186;2541;2542;2543;2544;2545;2546;2547;6956;6957;6958;6959;6960;6961;6962;6963;7498;7499;7500;7501;7502;7503;17129;17130;17131;20302;20303;20304;20305;20306;20307;20308;22432;22433;22434;22435;22436;28174;28175;28623	13;14;15;117;2337;7103;7104;7420;18665;21940;21941;21942;21943;23754;29628;29629;30000	14;117;2337;7104;7420;18665;21941;23754;29629;30000						-1
Q14008	Cytoskeleton-associated protein 5	CKAP5	sp|Q14008|CKAP5_HUMAN Cytoskeleton-associated protein 5 OS=Homo sapiens (Human) OX=9606 GN=CKAP5 PE=1 SV=3	1	6	6	6	3.4	3.4	3.4	225.49	0	18.188	11405000	12895000	106	107600	121650	6975300	3865700	5	5	17	Q14008	6	6	6	6	6	6	3.4	3.4	2032	2032	By MS/MS	By MS/MS	218	572;1160;1545;2053;2944;3142	True;True;True;True;True;True	610;1233;1650;2223;3180;3391	4764;4765;4766;4767;4768;4769;8988;8989;8990;8991;8992;8993;15208;15209;15210;15211;15212;15213;15214;20200;20201;20202;20203;20204;27294;27295;27296;27297;27298;27299;27300;28741;28742;28743;28744;28745;28746;28747	4649;4650;4651;4652;8693;8694;8695;8696;8697;17104;17105;21890;21891;28647;30126;30127;30128;30129	4650;8696;17104;21891;28647;30126						-1
Q14978	Nucleolar and coiled-body phosphoprotein 1	NOLC1	sp|Q14978|NOLC1_HUMAN Nucleolar and coiled-body phosphoprotein 1 OS=Homo sapiens (Human) OX=9606 GN=NOLC1 PE=1 SV=2	1	7	7	7	10.6	9.2	10.6	73.602	0	1.9089	5844700	27576000	33	177110	835630	3687000	13385000	2	11	17	Q14978	5	7	5	7	5	7	10.6	10.6	699	699	By MS/MS	By MS/MS	228	1991;2052;2473;2814;2815;2819;2979	True;True;True;True;True;True;True	2150;2222;2669;3039;3040;3044;3219	19680;19681;19682;19683;19684;19685;19686;20191;20192;20193;20194;20195;20196;20197;20198;20199;23438;26128;26129;26130;26131;26132;26133;26134;26138;26139;26140;26141;26142;26143;26144;26145;26146;26147;26148;26149;26150;26151;26152;26153;27599;27600;27601;27602;27603	21456;21457;21458;21887;21888;21889;25033;27453;27454;27458;27459;27460;27461;27462;27463;27464;29002	21457;21888;25033;27453;27454;27463;29002						-1
Q8IVT2	Mitotic interactor and substrate of PLK1	MISP	sp|Q8IVT2|MISP_HUMAN Mitotic interactor and substrate of PLK1 OS=Homo sapiens (Human) OX=9606 GN=MISP PE=1 SV=1	1	9	9	9	17.2	11.8	17.2	75.356	0	14.978	7889900	33587000	34	232060	987850	2806400	9132000	5	10	17	Q8IVT2	7	9	7	9	7	9	17.2	17.2	679	679	By MS/MS	By MS/MS	287	267;415;665;1026;1102;1797;1945;2183;3047	True;True;True;True;True;True;True;True;True	281;440;707;1094;1172;1918;2101;2357;3292	2118;3178;3179;3180;3181;3182;3183;3184;5345;5346;5347;5348;5349;5350;5351;8017;8018;8019;8020;8021;8022;8023;8024;8025;8488;8489;8490;8491;8492;8493;8494;17350;17351;19362;21202;21203;21204;21205;21206;28122;28123;28124;28125	2025;2811;5133;5134;7805;7806;7807;7808;8158;8159;8160;18950;18951;21201;22810;22811;29598	2025;2811;5134;7807;8158;18950;21201;22810;29598						-1
Q9NZI8	Insulin-like growth factor 2 mRNA-binding protein 1	IGF2BP1	sp|Q9NZI8|IF2B1_HUMAN Insulin-like growth factor 2 mRNA-binding protein 1 OS=Homo sapiens (Human) OX=9606 GN=IGF2BP1 PE=1 SV=2	1	8	2	2	12.7	12.7	12.7	63.48	0	2.9333	8303800	3782600	30	276790	126090	1994200	748180	1	0	17	Q9NZI8	8	8	2	2	2	2	4.7	4.7	577	577	By MS/MS	By MS/MS	374	455;1156;1246;1698;1933;1934;2213;2214	True;False;False;True;False;False;False;False	483;1229;1328;1813;2080;2081;2082;2083;2389;2390	3475;3476;3477;3478;3479;3480;8965;8966;8967;8968;8969;8970;8971;8972;8973;8974;8975;8976;8977;8978;8979;8980;8981;8982;10613;10614;10615;10616;10617;10618;10619;10620;10621;10622;10623;10624;10625;10626;10627;10628;10629;10630;10631;10632;10633;10634;10635;10636;10637;10638;10639;10640;10641;10642;10643;10644;10645;10646;10647;10648;10649;10650;10651;10652;10653;10654;10655;10656;10657;10658;106…	3036;8676;8677;8678;8679;8680;8681;8682;8683;8684;8685;8686;8687;8688;11273;11274;11275;11276;11277;11278;11279;11280;11281;11282;11283;11284;11285;11286;11287;11288;11289;11290;11291;11292;11293;11294;11295;11296;11297;11298;11299;11300;11301;11302;11303;11304;11305;11306;11307;11308;11309;11310;11311;11312;11313;11314;11315;11316;11317;11318;11319;11320;11321;11322;11323;11324;11325;11326;11327…	3036;8687;12055;18227;20347;21062;22958;22971	48		453			-1
P16152	Carbonyl reductase [NADPH] 1	CBR1	sp|P16152|CBR1_HUMAN Carbonyl reductase [NADPH] 1 OS=Homo sapiens (Human) OX=9606 GN=CBR1 PE=1 SV=3	1	3	3	3	23.1	23.1	23.1	30.375	0	26.191	3593400	5700300	17	211370	335310	3539200	3733400	1	2	16	P16152	3	3	3	3	3	3	23.1	23.1	277	277	By MS/MS	By MS/MS	124	724;803;2512	True;True;True	775;859;2713	5757;5758;5759;5760;5761;5762;5763;5764;5765;6310;6311;6312;6313;6314;6315;6316;6317;23700;23701;23702;23703;23704;23705;23706;23707;23708;23709;23710;23711;23712;23713;23714	5506;5507;5508;5509;5510;5965;25194;25195;25196;25197;25198;25199;25200;25201;25202;25203	5506;5965;25194						-1
Q5T6F2	Ubiquitin-associated protein 2	UBAP2	sp|Q5T6F2|UBAP2_HUMAN Ubiquitin-associated protein 2 OS=Homo sapiens (Human) OX=9606 GN=UBAP2 PE=1 SV=1	1	4	4	4	3.7	2.7	3.7	117.11	0	8.755	5988000	8709700	29	206480	300330	3780200	3742800	2	3	16	Q5T6F2	3	4	3	4	3	4	3.7	3.7	1119	1119	By MS/MS	By MS/MS	255	701;1776;2227;2533	True;True;True;True	751;1897;2404;2735	5635;5636;5637;5638;5639;5640;17105;17106;17107;17108;17109;17110;21514;21515;21516;21517;23847;23848;23849;23850;23851;23852	5422;5423;5424;5425;5426;5427;18657;18658;23086;23087;23088;23089;25291;25292;25293;25294	5427;18658;23088;25292	257		39			-1
Q8NHQ1	Centrosomal protein of 70 kDa	CEP70	sp|Q8NHQ1|CEP70_HUMAN Centrosomal protein of 70 kDa OS=Homo sapiens (Human) OX=9606 GN=CEP70 PE=1 SV=2	1	8	8	8	14.4	14.4	14.4	69.751	0	37.729	20984000	32945000	34	617170	968960	6540600	12143000	4	11	16	Q8NHQ1	8	8	8	8	8	8	14.4	14.4	597	597	By MS/MS	By MS/MS	298	198;423;951;1747;1958;2164;2633;3126	True;True;True;True;True;True;True;True	210;211;448;1011;1867;2114;2338;2840;3374	1580;1581;1582;1583;1584;1585;3235;3236;3237;7484;7485;7486;7487;7488;16940;16941;16942;16943;19434;19435;21109;21110;21111;24610;24611;28631;28632;28633	1549;1550;1551;2857;2858;2859;7416;7417;18576;18577;21245;22766;22767;25916;30006;30007	1550;2857;7417;18577;21245;22767;25916;30006	271;272		119;260			-1
Q969X6	Cirhin	CIRH1A	sp|Q969X6|UTP4_HUMAN U3 small nucleolar RNA-associated protein 4 homolog OS=Homo sapiens (Human) OX=9606 GN=UTP4 PE=1 SV=1	1	2	2	2	3.5	3.5	3.5	76.889	0.0082873	0.3051	2778500	5446400	33	84195	165040	1496100	2657600	2	2	16	Q969X6	2	2	2	2	2	2	3.5	3.5	686	686	By MS/MS	By MS/MS	316	478;2692	True;True	508;2905	3840;3841;3842;3843;3844;3845;25046;25047;25048;25049;25050;25051;25052;25053;25054;25055;25056;25057;25058;25059;25060;25061;25062;25063	3617;26372;26373;26374;26375;26376;26377;26378;26379;26380;26381;26382;26383;26384;26385;26386	3617;26379						-1
O15355	Protein phosphatase 1G	PPM1G	sp|O15355|PPM1G_HUMAN Protein phosphatase 1G OS=Homo sapiens (Human) OX=9606 GN=PPM1G PE=1 SV=1	1	6	6	6	17.9	7.7	2.2	59.271	0	29.512	1613900	443760	25	64556	17751	938420	240990	1	0	15	O15355	2	1	2	1	2	1	17.9	17.9	546	546	By MS/MS	By matching	58	313;559;707;1025;2006;2058	True;True;True;True;True;True	331;597;757;1093;2168;2228	2470;2471;2472;2473;4510;5675;5676;5677;8012;8013;8014;8015;8016;19788;19789;20237;20238;20239;20240;20241;20242;20243;20244;20245;20246;20247;20248;20249;20250;20251;20252	2286;4250;5451;5452;5453;7804;21549;21907;21908;21909;21910;21911;21912;21913;21914	2286;4250;5451;7804;21549;21912						-1
P19474	E3 ubiquitin-protein ligase TRIM21	TRIM21	sp|P19474|RO52_HUMAN E3 ubiquitin-protein ligase TRIM21 OS=Homo sapiens (Human) OX=9606 GN=TRIM21 PE=1 SV=1	1	4	4	4	8	8	5.9	54.169	0	1.3613	6550500	9135900	27	242610	338370	3715700	3990500	4	3	15	P19474	4	3	4	3	4	3	8	8	475	475	By MS/MS	By MS/MS	130	420;889;1193;1962	True;True;True;True	445;949;1268;2118	3219;3220;3221;3222;3223;3224;7066;9616;9617;9618;9619;9620;9621;9622;9623;9624;19448;19449;19450;19451;19452;19453;19454	2834;2835;2836;2837;7180;9845;9846;9847;9848;21253;21254;21255;21256;21257;21258	2836;7180;9845;21255						-1
Q9Y2D8	Afadin- and alpha-actinin-binding protein	SSX2IP	sp|Q9Y2D8|ADIP_HUMAN Afadin- and alpha-actinin-binding protein OS=Homo sapiens (Human) OX=9606 GN=SSX2IP PE=1 SV=3	1	7	7	7	12.2	10.4	9	71.235	0	21.405	7607200	10695000	35	217350	305570	2194900	4176100	0	3	15	Q9Y2D8	6	5	6	5	6	5	12.2	12.2	614	614	By MS/MS	By MS/MS	396	671;1141;1615;1644;1645;2004;2890	True;True;True;True;True;True;True	714;1213;1214;1724;1755;1756;2165;3119	5408;5409;5410;5411;5412;5413;8760;8761;8762;8763;8764;8765;8766;15688;15689;15690;15691;15944;15945;15946;15947;15948;15949;15950;15951;15952;15953;15954;15955;15956;15957;19772;19773;19774;19775;19776;19777;19778;26827;26828;26829;26830;26831	5234;5235;5236;8337;8338;17413;17414;17705;17706;17707;17708;21543;28271;28272;28273	5235;8338;17414;17705;17706;21543;28271	348;349		217;226			-1
O15287	Fanconi anemia group G protein	FANCG	sp|O15287|FANCG_HUMAN Fanconi anemia group G protein OS=Homo sapiens (Human) OX=9606 GN=FANCG PE=1 SV=1	1	8	8	8	15.1	8.2	13.3	68.553	0	67.07	5049700	13217000	36	140270	367130	2612300	3751600	1	6	14	O15287	4	7	4	7	4	7	15.1	15.1	622	622	By MS/MS	By MS/MS	57	258;378;482;492;580;2184;2824;2925	True;True;True;True;True;True;True;True	272;396;512;524;618;2358;3049;3157	2045;2046;2047;2048;2049;2050;2051;2052;2053;2054;2055;2056;2057;2058;2059;2060;2884;2885;2886;2887;3863;3864;3865;3866;3867;3868;3932;3933;3934;3935;3936;3937;3938;3939;3940;4794;4795;4796;4797;4798;4799;4800;21207;21208;21209;21210;21211;21212;26183;26184;26185;26186;26187;26188;26189;26190;27123;27124;27125	1988;1989;2586;3627;3687;3688;3689;3690;4682;22812;27489;28501;28502;28503	1989;2586;3627;3689;4682;22812;27489;28501						-1
O60506	Heterogeneous nuclear ribonucleoprotein Q	SYNCRIP	sp|O60506|HNRPQ_HUMAN Heterogeneous nuclear ribonucleoprotein Q OS=Homo sapiens (Human) OX=9606 GN=SYNCRIP PE=1 SV=2	2	11	11	11	18.6	0	1.8	69.602	0	45.269	0	744760	32	0	23274	0	153320	0	0	14	O60506;O43390	0	1	0	1	0	1	18.6	18.6	623	623;633		By matching	64	118;461;565;871;1704;1868;1995;2691;2816;2999;3000	True;True;True;True;True;True;True;True;True;True;True	125;489;603;931;1823;1994;2155;2904;3041;3239;3240	864;3674;3675;3676;4727;4728;6932;6933;6934;6935;6936;16617;17909;17910;19714;25042;25043;25044;25045;26135;27755;27756;27757;27758;27759	870;3407;3408;4627;7078;18291;19515;21501;26370;26371;27455;29112;29113;29114	870;3407;4627;7078;18291;19515;21501;26371;27455;29113;29114						-1;-1
P48740	Mannan-binding lectin serine protease 1;Mannan-binding lectin serine protease 1 heavy chain;Mannan-binding lectin serine protease 1 light chain	MASP1	sp|P48740|MASP1_HUMAN Mannan-binding lectin serine protease 1 OS=Homo sapiens (Human) OX=9606 GN=MASP1 PE=1 SV=3	2	3	3	3	4.4	4.4	4.4	79.246	0	15.8	7424900	8503800	29	256030	293230	3870300	3491000	2	2	14	P48740;P09871	3	3	3	3	3	3	4.4	4.4	699	699;688	By MS/MS	By MS/MS	165	458;2363;2846	True;True;True	486;2551;3074	3661;3662;3663;3664;3665;3666;22452;22453;22454;22455;22456;22457;26523;26524;26525;26526;26527;26528	3401;3402;23762;23763;23764;23765;23766;23767;28038;28039;28040;28041;28042;28043	3402;23764;28039						-1;-1
Q13596	Sorting nexin-1	SNX1	sp|Q13596|SNX1_HUMAN Sorting nexin-1 OS=Homo sapiens (Human) OX=9606 GN=SNX1 PE=1 SV=3	1	7	7	6	14.8	4.8	10.9	59.069	0	8.678	1394500	4823700	24	58103	200990	791590	826770	0	0	14	Q13596	2	5	2	5	2	4	14.8	12.6	522	522	By matching	By matching	216	177;299;612;805;1750;3012;3059	True;True;True;True;True;True;True	186;316;652;861;1870;3253;3304	1445;1446;1447;1448;2395;2396;2397;2398;2399;2400;2401;2402;5010;5011;5012;5013;6326;6327;16948;16949;16950;27861;27862;27863;27864;27865;27866;28184;28185;28186	1448;2240;2241;2242;4878;4879;5968;18580;18581;29253;29254;29255;29634;29635	1448;2241;4879;5968;18581;29254;29634						-1
P01683	Ig kappa chain V region 3315		sp|P01683|KV02_RABIT Ig kappa chain V region 3315 OS=Oryctolagus cuniculus PE=1 SV=1	6	2	2	1	20.9	20.9	20.9	12.012	0	2.0576	16399000	17085000	2	8199300	8542600	16518000	14032000	2	2	13	CON__sp|P01683|KV02_RABIT;CON__sp|P01690|KV09_RABIT;CON__sp|P01689|KV08_RABIT;CON__sp|P01688|KV07_RABIT;CON__sp|P01686|KV05_RABIT;CON__sp|P01691|KV10_RABIT	2	2	2	2	1	1	20.9	9.6	115	115;92;108;108;108;117	By MS/MS	By MS/MS	9	265;1814	True;True	279;1937	2100;2101;2102;2103;2104;2105;2106;2107;2108;17482;17483;17484;17485;17486;17487	2008;2009;2010;2011;2012;2013;2014;2015;2016;2017;2018;2019;19106	2014;19106					+	-1;-1;-1;-1;-1;-1
P20930	Filaggrin	FLG	sp|P20930|FILA_HUMAN Filaggrin OS=Homo sapiens GN=FLG PE=1 SV=3	2	8	8	8	5.2	0	0.3	435.16	0	9.2294	0	237370	210	0	1130.3	0	28711	0	0	13	P20930;CON__sp|P20930|FILA_HUMAN	0	1	0	1	0	1	5.2	5.2	4061	4061;4061		By matching	32	659;1051;1089;1090;1111;1114;1400;1516	True;True;True;True;True;True;True;True	701;1120;1158;1159;1182;1185;1497;1621	5299;5300;8210;8211;8212;8213;8214;8215;8216;8217;8421;8422;8423;8575;8589;8590;13559;13560;14984	5075;7956;7957;7958;7959;7960;8126;8127;8128;8215;8222;15068;15069;16944	5075;7959;8126;8128;8215;8222;15068;16944					+	-1;-1
P09960	Leukotriene A-4 hydrolase	LTA4H	sp|P09960|LKHA4_HUMAN Leukotriene A-4 hydrolase OS=Homo sapiens (Human) OX=9606 GN=LTA4H PE=1 SV=2	1	13	13	13	31.1	0	0	69.284	0	43.21	0	0	35	0	0	0	0	0	0	13	P09960	0	0	0	0	0	0	31.1	31.1	611	611			105	126;433;585;645;1073;1829;1853;2352;2485;2543;2649;2718;3049	True;True;True;True;True;True;True;True;True;True;True;True;True	133;458;624;685;1142;1952;1976;2539;2540;2681;2747;2858;2932;3294	940;941;942;3275;4832;4833;5216;5217;5218;8326;17563;17564;17713;22397;22398;22399;23534;23961;23962;23963;24698;25224;28131;28132;28133	955;956;2878;4729;5025;8039;19141;19280;23738;23739;25118;25391;25974;26480;29601	955;2878;4729;5025;8039;19141;19280;23739;25118;25391;25974;26480;29601	81;82		171;241			-1
Q02413	Desmoglein-1	DSG1	sp|Q02413|DSG1_HUMAN Desmoglein-1 OS=Homo sapiens (Human) OX=9606 GN=DSG1 PE=1 SV=2	1	9	9	9	12	0	0	113.75	0	25.564	0	0	41	0	0	0	0	0	0	13	Q02413	0	0	0	0	0	0	12	12	1049	1049			190	167;652;677;721;1304;1925;2124;2866;3157	True;True;True;True;True;True;True;True;True	175;176;692;720;772;1394;2069;2070;2298;3094;3406;3407	1239;1240;1241;5249;5446;5447;5747;12222;12223;18422;18423;20730;26648;26649;26650;28826;28827;28828	1182;1183;1184;5039;5250;5497;13435;13436;20145;20146;22346;28116;30188;30189	1182;5039;5250;5497;13436;20145;22346;28116;30189	206;207;208;209		133;208;425;651			-1
Q12931	Heat shock protein 75 kDa, mitochondrial	TRAP1	sp|Q12931|TRAP1_HUMAN Heat shock protein 75 kDa, mitochondrial OS=Homo sapiens (Human) OX=9606 GN=TRAP1 PE=1 SV=3	1	6	6	6	9.7	5	5	80.109	0	35.796	1145100	1834600	40	28628	45864	642270	778460	1	1	13	Q12931	3	3	3	3	3	3	9.7	9.7	704	704	By MS/MS	By MS/MS	208	85;234;626;633;1067;3154	True;True;True;True;True;True	91;248;666;673;1136;3403	598;599;600;601;602;1862;1863;1864;1865;1866;1867;1868;5097;5098;5099;5100;5101;5102;5103;5104;5136;8298;8299;28807;28808;28809;28810;28811;28812;28813;28814;28815	634;1829;4948;4965;8011;30170;30171;30172;30173;30174;30175;30176;30177	634;1829;4948;4965;8011;30172						-1
Q15758	Neutral amino acid transporter B(0)	SLC1A5	sp|Q15758|AAAT_HUMAN Neutral amino acid transporter B(0) OS=Homo sapiens (Human) OX=9606 GN=SLC1A5 PE=1 SV=2	1	3	3	3	6.7	4.4	4.4	56.598	0	3.0563	1271500	946680	16	79470	59168	1128700	650590	1	1	13	Q15758	2	2	2	2	2	2	6.7	6.7	541	541	By MS/MS	By MS/MS	235	714;978;1975	True;True;True	764;1042;2133	5709;5710;5711;5712;5713;5714;5715;5716;7699;19568;19569;19570;19571;19572;19573;19574	5471;5472;5473;5474;5475;5476;5477;5478;7595;21389;21390;21391;21392	5476;7595;21389						-1
Q8TC07	TBC1 domain family member 15	TBC1D15	sp|Q8TC07|TBC15_HUMAN TBC1 domain family member 15 OS=Homo sapiens (Human) OX=9606 GN=TBC1D15 PE=1 SV=2	1	4	4	4	5.9	5.9	5.9	79.49	0	3.4831	3269100	6496900	36	90807	180470	2182500	3542800	3	4	13	Q8TC07	4	4	4	4	4	4	5.9	5.9	691	691	By MS/MS	By MS/MS	302	1155;2445;2727;3004	True;True;True;True	1228;2636;2942;3245	8958;8959;8960;8961;8962;8963;8964;23133;23134;23135;23136;23137;23138;25274;25275;25276;25277;25278;27796;27797;27798;27799;27800;27801;27802;27803	8675;24521;24522;26541;26542;26543;26544;29178;29179;29180;29181;29182;29183	8675;24521;26543;29179						-1
O15371	Eukaryotic translation initiation factor 3 subunit D	EIF3D	sp|O15371|EIF3D_HUMAN Eukaryotic translation initiation factor 3 subunit D OS=Homo sapiens (Human) OX=9606 GN=EIF3D PE=1 SV=1	1	9	9	9	19.3	4.2	8	63.972	0	23.439	1186100	5722900	25	47443	228910	329240	763200	0	0	12	O15371	2	4	2	4	2	4	19.3	19.3	548	548	By matching	By MS/MS	59	847;1180;1593;1994;2595;2707;2817;3063;3114	True;True;True;True;True;True;True;True;True	905;1255;1701;2153;2154;2801;2921;3042;3308;3361	6653;6654;6655;6656;6657;9551;9552;9553;9554;9555;15543;15544;15545;19712;19713;24341;24342;25163;25164;26136;28201;28560	6660;6661;9815;9816;17311;21499;21500;25660;26442;27456;29641;29955	6660;9815;17311;21499;25660;26442;27456;29641;29955	59		314			-1
O60942	mRNA-capping enzyme;Polynucleotide 5-triphosphatase;mRNA guanylyltransferase	RNGTT	sp|O60942|MCE1_HUMAN mRNA-capping enzyme OS=Homo sapiens (Human) OX=9606 GN=RNGTT PE=1 SV=1	1	3	3	3	5.9	5.9	5.9	68.556	0	1.2735	7378500	10500000	30	245950	349990	4272400	4951900	2	2	12	O60942	3	3	3	3	3	3	5.9	5.9	597	597	By MS/MS	By MS/MS	69	651;912;1037	True;True;True	691;972;1105	5241;5242;5243;5244;5245;5246;5247;5248;7234;7235;7236;7237;7238;7239;7240;7241;7242;8092;8093;8094;8095;8096;8097;8098;8099;8100	5031;5032;5033;5034;5035;5036;5037;5038;7286;7287;7288;7877;7878	5034;7286;7878	64		557			-1
P33240	Cleavage stimulation factor subunit 2	CSTF2	sp|P33240|CSTF2_HUMAN Cleavage stimulation factor subunit 2 OS=Homo sapiens (Human) OX=9606 GN=CSTF2 PE=1 SV=1	1	9	5	5	22.7	2.1	12	60.959	0	33.34	644780	6770200	24	26866	282090	344010	1871000	0	1	12	P33240	1	5	1	3	1	3	13.9	13.9	577	577	By matching	By MS/MS	148	105;176;290;906;950;985;1047;1543;2472	True;False;False;False;False;True;True;True;True	112;185;306;307;966;1010;1049;1116;1648;2668	783;784;785;786;787;788;789;790;1436;1437;1438;1439;1440;1441;1442;1443;1444;2311;2312;2313;2314;2315;2316;2317;2318;2319;2320;7184;7185;7186;7187;7188;7189;7190;7480;7481;7482;7483;7736;7737;7738;8173;8174;8175;8176;8177;8178;8179;8180;15190;15191;15192;15193;15194;15195;15196;23433;23434;23435;23436;23437	833;834;1444;1445;1446;1447;2174;2175;2176;2177;2178;2179;7263;7264;7265;7266;7415;7621;7923;7924;7925;17094;17095;17096;17097;17098;25032	833;1445;2174;7264;7415;7621;7923;17098;25032	144;145;146		140;144;356			-1
P35579	Myosin-9	MYH9	sp|P35579|MYH9_HUMAN Myosin-9 OS=Homo sapiens (Human) OX=9606 GN=MYH9 PE=1 SV=4	3	7	7	7	4.2	3.7	3.7	226.53	0	10.175	7787900	13474000	104	74884	129560	2820500	5028400	1	5	12	P35579;P35580;P35749	6	6	6	6	6	6	4.2	4.2	1960	1960;1976;1972	By MS/MS	By MS/MS	151	42;2059;2634;2907;2917;2942;2988	True;True;True;True;True;True;True	43;2229;2841;3139;3149;3178;3228	251;252;253;254;255;20253;20254;20255;20256;20257;24612;24613;24614;24615;24616;24617;26948;26949;26950;26951;26952;26953;26954;26955;26956;26957;27042;27273;27274;27275;27276;27679;27680;27681;27682;27683;27684;27685;27686;27687	150;21915;25917;25918;28350;28351;28352;28353;28426;28632;29065;29066	150;21915;25918;28353;28426;28632;29065	147;148		365;547			-1;-1;-1
P56652	Inter-alpha-trypsin inhibitor heavy chain H3	ITIH3	sp|P56652|ITIH3_BOVIN Inter-alpha-trypsin inhibitor heavy chain H3 OS=Bos taurus GN=ITIH3 PE=1 SV=2	2	4	4	4	4.4	2.8	2.8	99.848	0	9.8528	4571200	4256400	37	123550	115040	4194100	3042800	2	1	12	Q06033;CON__sp|P56652|ITIH3_BOVIN	2	2	2	2	2	2	4.4	4.4	890	890;891	By MS/MS	By MS/MS	196	583;720;919;1398	True;True;True;True	621;771;979;1495	4811;4812;4813;4814;4815;4816;5741;5742;5743;5744;5745;5746;7277;7278;13548;13549	4689;4690;4691;4692;5491;5492;5493;5494;5495;5496;7299;15058	4692;5492;7299;15058					+	-1;-1
Q8TAT6	Nuclear protein localization protein 4 homolog	NPLOC4	sp|Q8TAT6|NPL4_HUMAN Nuclear protein localization protein 4 homolog OS=Homo sapiens (Human) OX=9606 GN=NPLOC4 PE=1 SV=3	1	4	4	4	6.6	4.3	2.8	68.119	0	4.8618	4526200	4261500	29	156080	146950	3527400	2808800	2	1	12	Q8TAT6	3	2	3	2	3	2	6.6	6.6	608	608	By MS/MS	By MS/MS	301	71;699;824;2974	True;True;True;True	76;749;881;3214	479;480;481;482;483;484;485;486;5623;5624;5625;6472;6473;6474;6475;6476;6477;6478;6479;27537;27538	563;564;565;566;567;568;5409;5410;5411;6531;6532;28920;28921	566;5409;6532;28921						-1
Q9H1B7	Interferon regulatory factor 2-binding protein-like	IRF2BPL	sp|Q9H1B7|I2BPL_HUMAN Probable E3 ubiquitin-protein ligase IRF2BPL OS=Homo sapiens (Human) OX=9606 GN=IRF2BPL PE=1 SV=1	1	10	8	8	18.1	0	0	82.658	0	29.416	0	0	38	0	0	0	0	0	0	12	Q9H1B7	0	0	0	0	0	0	14.8	14.8	796	796			352	476;1364;1563;1666;1943;2194;2198;2280;2861;3089	True;True;False;True;True;False;True;True;True;True	505;1458;1670;1777;2098;2368;2372;2459;3089;3335	3798;3799;3800;13179;13180;15354;15355;15356;16101;16102;19341;19342;19343;21260;21261;21262;21290;21291;21292;21840;21841;21842;26617;26618;26619;28389;28390	3498;3499;14721;14722;17212;17806;17807;21146;21147;22832;22833;22860;23346;28097;28098;28099;29797	3499;14722;17212;17807;21146;22832;22860;23346;28097;29797	313	56	413	547		-1
Q9H4L4	Sentrin-specific protease 3	SENP3	sp|Q9H4L4|SENP3_HUMAN Sentrin-specific protease 3 OS=Homo sapiens (Human) OX=9606 GN=SENP3 PE=1 SV=2	1	4	4	4	8.2	6.3	8.2	65.009	0	3.0625	2727800	6428000	21	129900	306100	3126900	3235400	2	3	12	Q9H4L4	3	4	3	4	3	4	8.2	8.2	574	574	By MS/MS	By MS/MS	357	2401;2687;2887;3116	True;True;True;True	2590;2899;3116;3363	22713;22714;22715;22716;22717;22718;22719;22720;22721;25019;25020;25021;25022;26793;28565;28566;28567;28568;28569;28570;28571	23953;26349;26350;26351;26352;28249;29957;29958;29959;29960;29961;29962	23953;26349;28249;29960						-1
Q9NQU5	Serine/threonine-protein kinase PAK 6	PAK6	sp|Q9NQU5|PAK6_HUMAN Serine/threonine-protein kinase PAK 6 OS=Homo sapiens (Human) OX=9606 GN=PAK6 PE=1 SV=1	2	8	8	7	17.9	0	0	74.868	0	36.704	0	0	35	0	0	0	0	0	0	12	Q9NQU5;Q9P286	0	0	0	0	0	0	17.9	16.3	681	681;719			364	239;240;630;841;1003;1186;1808;2374	True;True;True;True;True;True;True;True	253;254;670;899;1068;1261;1930;2562	1900;1901;1902;5118;5119;5120;6602;6603;6604;7843;9584;9585;9586;17442;17443;17444;22509;22510;22511	1850;1851;4957;6611;6612;7681;9825;9826;9827;19039;19040;23797	1850;1851;4957;6611;7681;9825;19039;23797	67;319		76;456			-1;-1
O60749	Sorting nexin-2	SNX2	sp|O60749|SNX2_HUMAN Sorting nexin-2 OS=Homo sapiens (Human) OX=9606 GN=SNX2 PE=1 SV=2	1	5	4	4	11	8.9	8.3	58.47	0	22.368	2755700	2980000	27	102060	110370	1141100	1147300	1	0	11	O60749	4	4	4	3	4	3	8.9	8.9	519	519	By MS/MS	By MS/MS	68	177;303;804;2185;3050	False;True;True;True;True	186;321;860;2359;3295	1445;1446;1447;1448;2415;2416;2417;2418;6318;6319;6320;6321;6322;6323;6324;6325;21213;21214;21215;21216;21217;21218;28134;28135;28136;28137;28138;28139;28140	1448;2252;2253;2254;5966;5967;22813;22814;29602;29603;29604;29605	1448;2253;5966;22813;29605						-1
O76031	ATP-dependent Clp protease ATP-binding subunit clpX-like, mitochondrial	CLPX	sp|O76031|CLPX_HUMAN ATP-dependent Clp protease ATP-binding subunit clpX-like, mitochondrial OS=Homo sapiens (Human) OX=9606 GN=CLPX PE=1 SV=2	1	7	7	7	13.6	3.6	11.5	69.223	0	41.237	707700	8961800	39	18146	229790	479400	2431900	0	2	11	O76031	2	6	2	6	2	6	13.6	13.6	633	633	By matching	By MS/MS	74	490;1661;1680;2398;2507;2720;3111	True;True;True;True;True;True;True	522;1772;1792;2587;2707;2934;3358	3927;3928;3929;16072;16073;16074;16075;16076;16206;16207;16208;22696;22697;22698;22699;22700;23666;23667;23668;23669;23670;25226;25227;25228;25229;25230;25231;25232;28547;28548;28549;28550	3684;3685;17792;17879;17880;23947;25185;26482;26483;26484;29950	3684;17792;17880;23947;25185;26483;29950						-1
P04406	Glyceraldehyde-3-phosphate dehydrogenase	GAPDH	sp|P04406|G3P_HUMAN Glyceraldehyde-3-phosphate dehydrogenase OS=Homo sapiens (Human) OX=9606 GN=GAPDH PE=1 SV=3	1	7	7	7	31	4.5	10.7	36.053	0	24.403	552500	1206700	17	32500	70981	327360	419320	0	0	11	P04406	1	2	1	2	1	2	31	31	335	335	By matching	By matching	90	96;842;1635;1839;2903;2965;3018	True;True;True;True;True;True;True	103;900;1746;1962;3134;3135;3205;3259	738;6605;6606;6607;6608;6609;6610;6611;6612;6613;15853;15854;15855;17621;26912;26913;26914;26915;26916;26917;26918;26919;26920;27476;27477;27478;27479;27876	801;6613;6614;6615;17536;19168;28331;28332;28889;28890;29261	801;6615;17536;19168;28331;28889;29261	68;69		130;133			-1
P06733	Alpha-enolase	ENO1	sp|P06733|ENOA_HUMAN Alpha-enolase OS=Homo sapiens (Human) OX=9606 GN=ENO1 PE=1 SV=2	1	3	3	3	10.1	5.8	10.1	47.168	0	6.0574	1064800	1787700	22	48401	81257	514780	631760	0	1	11	P06733	2	3	2	3	2	3	10.1	10.1	434	434	By matching	By MS/MS	96	363;970;3102	True;True;True	381;1032;3349	2809;2810;2811;2812;2813;2814;2815;7606;7607;7608;7609;7610;7611;7612;7613;7614;28466;28467;28468;28469;28470;28471;28472;28473;28474	2548;7521;7522;29855;29856;29857;29858;29859;29860;29861;29862	2548;7521;29862						-1
P43005	Excitatory amino acid transporter 3	SLC1A1	sp|P43005|EAA3_HUMAN Excitatory amino acid transporter 3 OS=Homo sapiens (Human) OX=9606 GN=SLC1A1 PE=1 SV=2	1	2	2	2	4	4	4	57.1	0	1.8441	4259500	5619600	18	236640	312200	2305500	2326400	1	2	11	P43005	2	2	2	2	2	2	4	4	524	524	By MS/MS	By MS/MS	159	314;588	True;True	332;627	2474;2475;2476;2477;2478;2479;2480;2481;2482;2483;2484;2485;4849;4850;4851;4852;4853;4854;4855;4856;4857;4858;4859;4860	2287;2288;2289;2290;4743;4744;4745;4746;4747;4748;4749	2289;4745						-1
Q09666	Neuroblast differentiation-associated protein AHNAK	AHNAK	sp|Q09666|AHNK_HUMAN Neuroblast differentiation-associated protein AHNAK OS=Homo sapiens (Human) OX=9606 GN=AHNAK PE=1 SV=2	1	6	6	6	1.3	1	1.1	629.09	0	95.602	5719100	12761000	376	15210	33938	2126600	7142600	1	5	11	Q09666	4	5	4	5	4	5	1.3	1.3	5890	5890	By MS/MS	By MS/MS	204	371;405;1277;1731;2513;2871	True;True;True;True;True;True	389;430;1366;1850;2714;3099	2848;2849;2850;2851;2852;3114;3115;3116;11656;16833;16834;16835;16836;16837;16838;16839;23715;23716;23717;23718;26667;26668;26669;26670;26671	2569;2768;12548;18512;18513;25204;28122;28123;28124;28125;28126	2569;2768;12548;18512;25204;28124						-1
Q13049	E3 ubiquitin-protein ligase TRIM32	TRIM32	sp|Q13049|TRI32_HUMAN E3 ubiquitin-protein ligase TRIM32 OS=Homo sapiens (Human) OX=9606 GN=TRIM32 PE=1 SV=2	1	4	4	4	7.4	4.3	6	71.988	0	11.015	1779400	6506200	36	49428	180730	1453200	3531000	1	3	11	Q13049	2	3	2	3	2	3	7.4	7.4	653	653	By MS/MS	By MS/MS	210	1;642;890;2873	True;True;True;True	1;682;950;3101	2;3;4;5;6;7;8;9;5202;5203;5204;5205;7067;26693;26694;26695;26696;26697;26698;26699	2;3;4;5;6;7;8;5012;5013;7181;28177;28178	2;5013;7181;28178						-1
Q13356	Peptidyl-prolyl cis-trans isomerase-like 2	PPIL2	sp|Q13356|PPIL2_HUMAN RING-type E3 ubiquitin-protein ligase PPIL2 OS=Homo sapiens (Human) OX=9606 GN=PPIL2 PE=1 SV=1	1	11	11	11	22.1	0	0	58.823	0	5.6735	0	0	29	0	0	0	0	0	0	11	Q13356	0	0	0	0	0	0	22.1	22.1	520	520			214	381;429;705;1135;1214;1215;1620;1707;2526;2635;3020	True;True;True;True;True;True;True;True;True;True;True	399;454;755;1207;1291;1292;1729;1826;2727;2842;3261	2897;2898;3264;3265;3266;5666;8730;8731;9830;9831;9832;9833;15731;16642;23796;23797;23798;24618;24619;27882	2589;2874;5445;8325;10009;10010;17454;18297;25262;25919;29263	2589;2874;5445;8325;10009;10010;17454;18297;25262;25919;29263						-1
Q14181	DNA polymerase alpha subunit B	POLA2	sp|Q14181|DPOA2_HUMAN DNA polymerase alpha subunit B OS=Homo sapiens (Human) OX=9606 GN=POLA2 PE=1 SV=2	1	3	3	3	7.7	7.7	5.5	65.947	0	6.5684	4082200	6214300	24	170090	258930	2913400	3410900	3	2	11	Q14181	3	2	3	2	3	2	7.7	7.7	598	598	By MS/MS	By MS/MS	220	2514;2547;2926	True;True;True	2715;2751;3158	23719;23720;23721;23722;23723;23724;23725;23726;23974;23975;23976;23977;23978;23979;23980;23981;23982;27126	25205;25206;25398;25399;25400;25401;25402;25403;25404;25405;28504	25205;25398;28504						-1
Q9BVL2	Nucleoporin p58/p45	NUPL1	sp|Q9BVL2|NUP58_HUMAN Nucleoporin p58/p45 OS=Homo sapiens (Human) OX=9606 GN=NUP58 PE=1 SV=1	1	2	2	2	5	5	5	60.896	0	4.5474	2092200	6488900	12	174350	540740	2081400	5194700	1	2	11	Q9BVL2	2	2	2	2	2	2	5	5	599	599	By MS/MS	By MS/MS	339	1892;2743	True;True	2023;2959	18072;18073;18074;18075;18076;18077;18078;25365;25366;25367;25368;25369;25370;25371;25372	19621;19622;19623;19624;26593;26594;26595;26596;26597;26598;26599	19621;26595	297		423			-1
Q2UVX4	Complement C3	C3	sp|Q2UVX4|CO3_BOVIN Complement C3 OS=Bos taurus GN=C3 PE=1 SV=2	1	3	3	3	2.3	2.3	2.3	187.25	0	8.0754	4544900	11465000	99	45908	115810	2663100	5931200	2	2	10	CON__sp|Q2UVX4|CO3_BOVIN	3	3	3	3	3	3	2.3	2.3	1661	1661	By MS/MS	By MS/MS	37	1705;2661;2853	True;True;True	1824;2870;3081	16618;16619;16620;16621;16622;16623;24756;24757;24758;24759;24760;24761;24762;24763;26564;26565;26566;26567;26568;26569	18292;18293;26026;26027;26028;26029;28079;28080;28081;28082	18292;26027;28081					+	-1
Q6KB66	Keratin, type II cytoskeletal 80	KRT80	sp|Q6KB66|K2C80_HUMAN Keratin, type II cytoskeletal 80 OS=Homo sapiens GN=KRT80 PE=1 SV=2	3	9	9	9	21.7	1.5	0	50.525	0	64.401	212760	0	33	6447.3	0	34962	0	0	0	10	Q6KB66;CON__sp|Q6KB66|K2C80_HUMAN;CON__sp|Q0VBK2|K2C80_MOUSE	1	0	1	0	1	0	21.7	21.7	452	452;452;452	By matching		40	993;1297;1522;1556;2470;2530;2610;2970;3013	True;True;True;True;True;True;True;True;True	1058;1387;1627;1661;2666;2731;2816;3210;3254	7784;12178;15021;15299;15300;23429;23832;24445;27511;27512;27513;27867	7652;13411;16972;17171;25027;25281;25756;28903;28904;29256	7652;13411;16972;17171;25027;25281;25756;28904;29256					+	-1;-1;-1
Q8N1N4	Keratin, type II cytoskeletal 78	KRT78	sp|Q8N1N4|K2C78_HUMAN Keratin, type II cytoskeletal 78 OS=Homo sapiens GN=KRT78 PE=2 SV=2	2	10	10	10	17.9	0	0	56.865	0	18.325	0	0	29	0	0	0	0	0	0	10	Q8N1N4;CON__sp|Q8N1N4|K2C78_HUMAN	0	0	0	0	0	0	17.9	17.9	520	520;520			44	1166;1655;1768;1769;2161;2463;2708;2752;2836;3108	True;True;True;True;True;True;True;True;True;True	1240;1766;1889;1890;2335;2656;2922;2968;3063;3355	9040;9041;16042;17052;17053;17054;17055;21104;23372;25165;25425;25426;26435;28537	8776;17774;18640;18641;22761;24969;26443;26641;27962;29941	8776;17774;18640;18641;22761;24969;26443;26641;27962;29941					+	-1;-1
O00571;O15523	ATP-dependent RNA helicase DDX3X;ATP-dependent RNA helicase DDX3Y	DDX3X;DDX3Y	sp|O00571|DDX3X_HUMAN ATP-dependent RNA helicase DDX3X OS=Homo sapiens (Human) OX=9606 GN=DDX3X PE=1 SV=3;sp|O15523|DDX3Y_HUMAN ATP-dependent RNA helicase DDX3Y OS=Homo sapiens (Human) OX=9606 GN=DDX3Y PE=1 SV=2	2	5	4	4	9.1	7.3	9.1	73.243	0	5.5816	3205000	7940100	39	82179	203590	1741500	2967600	0	4	10	O00571;O15523	4	5	3	4	3	4	7.4	7.4	662	662;660	By MS/MS	By MS/MS	54	1909;2232;2515;2876;2881	False;True;True;True;True	2045;2046;2047;2409;2716;3104;3110	18271;18272;18273;18274;18275;18276;18277;18278;18279;18280;18281;18282;18283;18284;18285;18286;18287;18288;18289;18290;18291;18292;18293;18294;18295;18296;18297;18298;18299;18300;18301;18302;18303;21543;21544;21545;21546;21547;21548;21549;23727;23728;23729;23730;23731;23732;23733;23734;23735;26715;26716;26717;26718;26719;26720;26753;26754;26755;26756;26757;26758;26759;26760;26761	19990;19991;19992;19993;19994;19995;19996;19997;19998;19999;20000;20001;20002;20003;20004;20005;20006;20007;20008;20009;20010;20011;20012;20013;20014;20015;20016;20017;20018;20019;20020;20021;20022;20023;20024;20025;20026;20027;20028;20029;20030;20031;20032;20033;20034;20035;20036;20037;20038;20039;23102;23103;25207;28185;28186;28220;28221;28222;28223;28224	20007;23102;25207;28185;28220	56;57		352;355			-1;-1
P01024	Complement C3;Complement C3 beta chain;C3-beta-c;Complement C3 alpha chain;C3a anaphylatoxin;Acylation stimulating protein;Complement C3b alpha chain;Complement C3c alpha chain fragment 1;Complement C3dg fragment;Complement C3g fragment;Complement C3d fragment;Complement C3f fragment;Complement C3c alpha chain fragment 2	C3	sp|P01024|CO3_HUMAN Complement C3 OS=Homo sapiens (Human) OX=9606 GN=C3 PE=1 SV=2	1	2	2	2	1.1	1.1	1.1	187.15	0	9.397	10401000	18947000	97	107230	195330	10149000	14052000	2	2	10	P01024	2	2	2	2	2	2	1.1	1.1	1663	1663	By MS/MS	By MS/MS	82	216;301	True;True	230;318	1730;1731;1732;1733;1734;1735;2404;2405;2406;2407;2408;2409	1693;1694;1695;1696;1697;2244;2245;2246;2247;2248	1697;2245						-1
P07477;P07478;Q8NHM4	Trypsin-1;Alpha-trypsin chain 1;Alpha-trypsin chain 2;Trypsin-2;Putative trypsin-6	PRSS1;PRSS2;PRSS3P2	sp|P07477|TRY1_HUMAN Trypsin-1 OS=Homo sapiens (Human) OX=9606 GN=PRSS1 PE=1 SV=1;sp|P07478|TRY2_HUMAN Trypsin-2 OS=Homo sapiens (Human) OX=9606 GN=PRSS2 PE=1 SV=1;sp|Q8NHM4|TRY6_HUMAN Putative trypsin-6 OS=Homo sapiens (Human) OX=9606 GN=PRSS3P2 PE=5 SV=2	3	2	2	2	11.7	11.7	3.6	26.558	0.0031056	0.93656	10625000	8246600	8	1328100	1030800	10864000	8714200	3	0	10	P07477;P07478;Q8NHM4	2	1	2	1	2	1	11.7	11.7	247	247;247;247	By MS/MS	By MS/MS	100	1228;1595	True;True	1305;1703	10109;10110;10111;10112;10113;10114;10115;10116;10117;15562;15563;15564;15565;15566	10457;10458;10459;10460;10461;17354;17355;17356;17357;17358	10457;17357						-1;-1;-1
P17066;P48741	Heat shock 70 kDa protein 6;Putative heat shock 70 kDa protein 7	HSPA6;HSPA7	sp|P17066|HSP76_HUMAN Heat shock 70 kDa protein 6 OS=Homo sapiens (Human) OX=9606 GN=HSPA6 PE=1 SV=2;sp|P48741|HSP77_HUMAN Putative heat shock 70 kDa protein 7 OS=Homo sapiens (Human) OX=9606 GN=HSPA7 PE=5 SV=2	2	12	1	1	17.4	15.7	17.4	71.027	0	4.6897	183240000	229660000	37	4952500	6207000	239020000	229660000	1	1	10	P17066;P48741	11	12	1	1	1	1	1.7	1.7	643	643;367	By MS/MS	By MS/MS	125	246;273;441;750;755;1225;1330;1331;1681;2575;2780;2851	False;False;False;False;False;False;False;False;False;False;False;True	260;287;469;803;808;1302;1423;1424;1793;2780;3000;3079	1938;1939;1940;1941;1942;1943;1944;1945;1946;1947;1948;1949;1950;1951;1952;1953;1954;1955;2152;2153;2154;2155;2156;2157;2158;2159;2160;2161;2162;2163;2164;2165;2166;2167;2168;2169;3364;3365;3366;3367;3368;3369;3370;3371;3372;5950;5951;5952;5953;5954;5955;5956;5957;5958;5977;10068;10069;10070;10071;10072;10073;10074;10075;10076;10077;10078;10079;10080;10081;10082;10083;10084;10085;10086;10087;1294…	1892;1893;1894;1895;1896;1897;1898;1899;1900;1901;1902;1903;1904;1905;1906;1907;1908;1909;1910;1911;1912;1913;1914;1915;1916;1917;1918;1919;1920;1921;1922;2045;2046;2047;2048;2049;2050;2051;2052;2053;2054;2055;2056;2057;2058;2059;2060;2061;2062;2063;2064;2065;2066;2067;2068;2069;2070;2071;2954;2955;2956;2957;2958;2959;2960;2961;5643;5644;5645;5646;5647;5648;5649;5650;5651;5652;5653;5654;5655;5656…	1895;2058;2956;5660;5677;10412;14553;14572;17889;25535;26769;28075						-1;-1
P28290	Sperm-specific antigen 2	SSFA2	sp|P28290|ITPI2_HUMAN Protein ITPRID2 OS=Homo sapiens (Human) OX=9606 GN=ITPRID2 PE=1 SV=3	1	9	9	9	7.2	6.6	7.2	138.38	0	7.5422	5985400	21353000	65	92084	328510	1537700	10244000	2	8	10	P28290	7	9	7	9	7	9	7.2	7.2	1259	1259	By MS/MS	By MS/MS	141	549;606;696;979;1381;1668;2535;2573;3152	True;True;True;True;True;True;True;True;True	587;646;746;1043;1476;1779;2737;2778;3401	4422;4977;4978;4979;4980;4981;5612;5613;7700;7701;7702;13331;13332;16110;16111;23861;23862;23863;23864;23865;23866;24149;24150;24151;24152;24153;24154;28802;28803;28804;28805	4180;4865;5400;7596;14831;14832;17814;17815;25297;25298;25523;30168	4180;4865;5400;7596;14831;17814;25297;25523;30168		14		739		-1
Q03519	Antigen peptide transporter 2	TAP2	sp|Q03519|TAP2_HUMAN Antigen peptide transporter 2 OS=Homo sapiens (Human) OX=9606 GN=TAP2 PE=1 SV=1	1	5	5	5	8.6	3.1	8.6	75.663	0.0031847	1.15	742460	9868900	30	24749	328960	1121800	2616800	1	3	10	Q03519	2	5	2	5	2	5	8.6	8.6	686	686	By MS/MS	By MS/MS	194	112;797;1597;2116;2388	True;True;True;True;True	119;853;1705;2290;2576	831;832;833;6283;6284;6285;6286;6287;6288;6289;15574;15575;15576;15577;20688;20689;20690;20691;22628;22629;22630;22631;22632;22633	856;5953;17361;22320;22321;22322;22323;23910;23911;23912	856;5953;17361;22320;23911						-1
Q5T749	Keratinocyte proline-rich protein	KPRP	sp|Q5T749|KPRP_HUMAN Keratinocyte proline-rich protein OS=Homo sapiens (Human) OX=9606 GN=KPRP PE=1 SV=1	1	6	6	6	10.5	9	1.6	64.135	0	19.116	5588000	223980	25	223520	8959.3	982900	124530	1	0	10	Q5T749	4	1	4	1	4	1	10.5	10.5	579	579	By MS/MS	By matching	256	338;1002;1558;2170;2265;2305	True;True;True;True;True;True	356;1067;1663;2344;2444;2489	2621;7836;7837;7838;7839;7840;7841;7842;15303;15304;21132;21133;21134;21756;21757;21758;21759;22000;22001;22002;22003;22004;22005;22006	2372;7679;7680;17174;22778;23275;23276;23277;23278;23436	2372;7680;17174;22778;23278;23436						-1
Q9H4G0	Band 4.1-like protein 1	EPB41L1	sp|Q9H4G0|E41L1_HUMAN Band 4.1-like protein 1 OS=Homo sapiens (Human) OX=9606 GN=EPB41L1 PE=1 SV=2	1	5	5	5	6.6	1.1	2.8	98.502	0	2.5255	361590	1675300	47	7693.5	35644	235660	304130	0	0	10	Q9H4G0	1	2	1	2	1	2	6.6	6.6	881	881	By matching	By matching	356	1107;1417;1852;2109;2270	True;True;True;True;True	1177;1514;1975;2282;2449	8525;8526;8527;8528;8529;8530;8531;8532;8533;8534;8535;8536;14182;14183;14184;14185;17710;17711;17712;20652;20653;20654;20655;20656;21799;21800	8184;8185;8186;8187;8188;16134;19278;19279;22299;23322	8187;16134;19279;22299;23322						-1
Q9UHB6	LIM domain and actin-binding protein 1	LIMA1	sp|Q9UHB6|LIMA1_HUMAN LIM domain and actin-binding protein 1 OS=Homo sapiens (Human) OX=9606 GN=LIMA1 PE=1 SV=1	1	8	8	8	13.8	12	13.8	85.225	0	17.91	8534500	24579000	52	164130	472680	2719500	10149000	2	7	10	Q9UHB6	7	8	7	8	7	8	13.8	13.8	759	759	By MS/MS	By MS/MS	384	976;1071;1298;1654;1788;1796;1959;2202	True;True;True;True;True;True;True;True	1040;1140;1388;1765;1909;1917;2115;2377	7689;7690;7691;7692;7693;7694;7695;8314;8315;8316;12179;12180;12181;12182;16041;17202;17203;17204;17205;17343;17344;17345;17346;17347;17348;17349;19436;19437;19438;19439;19440;19441;21319;21320;21321	7591;7592;8023;13412;17773;18721;18947;18948;18949;21246;22902	7591;8023;13412;17773;18721;18947;21246;22902						-1
P01008	Antithrombin-III	SERPINC1	sp|P01008|ANT3_HUMAN Antithrombin-III OS=Homo sapiens (Human) OX=9606 GN=SERPINC1 PE=1 SV=1	1	2	2	1	3.9	3.9	3.9	52.602	0.0030303	0.87005	11100000	12750000	27	411110	472210	7285900	6201100	2	1	9	P01008	2	2	2	2	1	1	3.9	2.4	464	464	By MS/MS	By MS/MS	81	373;747	True;True	391;800	2860;2861;2862;2863;2864;2865;2866;2867;2868;2869;2870;2871;5932;5933;5934;5935;5936	2574;2575;2576;2577;2578;2579;2580;2581;5634	2580;5634						-1
P07355;A6NMY6	Annexin A2;Putative annexin A2-like protein	ANXA2;ANXA2P2	sp|P07355|ANXA2_HUMAN Annexin A2 OS=Homo sapiens (Human) OX=9606 GN=ANXA2 PE=1 SV=2;sp|A6NMY6|AXA2L_HUMAN Putative annexin A2-like protein OS=Homo sapiens (Human) OX=9606 GN=ANXA2P2 PE=5 SV=2	2	9	9	9	34.2	0	0	38.604	0	51.2	0	0	23	0	0	0	0	0	0	9	P07355;A6NMY6	0	0	0	0	0	0	34.2	34.2	339	339;339			97	360;946;1029;2115;2234;2501;2632;2730;2735	True;True;True;True;True;True;True;True;True	378;1006;1097;2289;2411;2697;2839;2945;2950	2798;7461;8036;8037;8038;20686;20687;21559;21560;23614;23615;24609;25292;25308;25309	2539;7409;7815;22319;23108;25162;25915;26551;26559	2539;7409;7815;22319;23108;25162;25915;26551;26559						-1;-1
P10451	Osteopontin	SPP1	sp|P10451|OSTP_HUMAN Osteopontin OS=Homo sapiens (Human) OX=9606 GN=SPP1 PE=1 SV=1	1	2	2	2	13.7	13.7	13.7	35.422	0	16.061	4992000	6047200	12	416000	503930	3522600	3825000	0	2	9	P10451	2	2	2	2	2	2	13.7	13.7	314	314	By matching	By MS/MS	110	129;2175	True;True	136;2349	954;955;956;957;958;959;960;961;21144;21145;21146;21147;21148;21149;21150;21151	959;960;961;962;963;964;965;22784;22785;22786;22787	963;22786						-1
P17812	CTP synthase 1	CTPS1	sp|P17812|PYRG1_HUMAN CTP synthase 1 OS=Homo sapiens (Human) OX=9606 GN=CTPS1 PE=1 SV=2	1	3	3	3	5.8	5.8	5.8	66.69	0	4.2206	2724200	4748400	30	90806	158280	1486900	1783200	1	1	9	P17812	3	3	3	3	3	3	5.8	5.8	591	591	By MS/MS	By MS/MS	126	806;944;1664	True;True;True	862;1004;1775	6328;6329;6330;6331;6332;6333;6334;7444;7445;7446;7447;7448;7449;7450;7451;7452;16089;16090;16091;16092;16093;16094;16095;16096;16097	5969;5970;5971;5972;5973;5974;7404;7405;17803;17804	5972;7404;17803						-1
P31944	Caspase-14;Caspase-14 subunit p17, mature form;Caspase-14 subunit p10, mature form;Caspase-14 subunit p20, intermediate form;Caspase-14 subunit p8, intermediate form	CASP14	sp|P31944|CASPE_HUMAN Caspase-14 OS=Homo sapiens (Human) OX=9606 GN=CASP14 PE=1 SV=2	1	8	8	8	33.9	0	0	27.679	0	95.944	0	0	15	0	0	0	0	0	0	9	P31944	0	0	0	0	0	0	33.9	33.9	242	242			146	449;582;801;916;1469;1573;1875;2244	True;True;True;True;True;True;True;True	477;620;857;976;1570;1680;2001;2421	3413;3414;4810;6300;7262;14616;14617;14618;14619;15430;17945;17946;21620;21621	2991;4688;5958;7294;16599;16600;17255;19528;23170	2991;4688;5958;7294;16600;17255;19528;23170						-1
Q8IYB3	Serine/arginine repetitive matrix protein 1	SRRM1	sp|Q8IYB3|SRRM1_HUMAN Serine/arginine repetitive matrix protein 1 OS=Homo sapiens (Human) OX=9606 GN=SRRM1 PE=1 SV=2	1	16	16	16	19.4	0	0	102.33	0	323.31	0	0	41	0	0	0	0	0	0	9	Q8IYB3	0	0	0	0	0	0	19.4	19.4	904	904			289	31;214;215;289;1360;1390;1873;2237;2249;2296;2301;2302;2303;2330;2620;2946	True;True;True;True;True;True;True;True;True;True;True;True;True;True;True;True	32;228;229;305;1454;1485;1486;1999;2414;2426;2476;2477;2485;2486;2487;2517;2827;3183	187;188;189;1724;1725;1726;1727;1728;1729;2307;2308;2309;2310;13159;13160;13161;13442;13443;13444;13445;13446;13447;13448;13449;13450;17940;17941;17942;21579;21580;21581;21649;21650;21651;21931;21932;21933;21934;21935;21936;21988;21989;21990;21991;21992;21993;21994;21995;21996;22247;22248;22249;24540;24541;24542;27330;27331;27332	118;119;120;121;122;1679;1680;1681;1682;1683;1684;1685;1686;1687;1688;1689;1690;1691;1692;2170;2171;2172;2173;14706;14707;14708;14957;14958;14959;14960;14961;14962;14963;19524;19525;19526;23124;23182;23183;23184;23389;23390;23391;23428;23429;23430;23431;23432;23605;23606;25870;28674;28675	122;1680;1691;2171;14707;14962;19526;23124;23183;23390;23430;23431;23432;23606;25870;28674	267	45;46;47;48;49;50;51;52	473	450;597;616;653;695;696;738;874		-1
Q8WX92	Negative elongation factor B	NELFB	sp|Q8WX92|NELFB_HUMAN Negative elongation factor B OS=Homo sapiens (Human) OX=9606 GN=NELFB PE=1 SV=1	1	2	2	2	4.5	4.5	4.5	65.697	0.003003	0.80942	2637200	3130900	29	90938	107960	2396600	2174200	2	1	9	Q8WX92	2	2	2	2	2	2	4.5	4.5	580	580	By MS/MS	By MS/MS	308	152;2984	True;True	159;3224	1145;1146;1147;1148;1149;1150;1151;1152;27659;27660;27661;27662;27663	1131;1132;1133;1134;1135;1136;1137;29050;29051	1137;29050						-1
Q96PK6	RNA-binding protein 14	RBM14	sp|Q96PK6|RBM14_HUMAN RNA-binding protein 14 OS=Homo sapiens (Human) OX=9606 GN=RBM14 PE=1 SV=2	1	7	7	7	15.2	9.9	13.8	69.491	0	28.469	3589700	11073000	23	156070	481450	1025500	3044200	0	2	9	Q96PK6	5	6	5	6	5	6	15.2	15.2	669	669	By matching	By MS/MS	329	117;237;271;1181;2267;2755;3143	True;True;True;True;True;True;True	124;251;285;1256;2446;2971;3392	856;857;858;859;860;861;862;863;1887;1888;1889;1890;2137;2138;2139;2140;2141;2142;2143;2144;9556;9557;9558;9559;9560;9561;9562;21765;21766;21767;21768;21769;21770;21771;25435;25436;25437;28748;28749;28750	869;1842;2039;9817;23282;23283;23284;26644;30130	869;1842;2039;9817;23283;26644;30130						-1
Q9BYJ9;Q7Z739	YTH domain-containing family protein 1;YTH domain-containing family protein 3	YTHDF1;YTHDF3	sp|Q9BYJ9|YTHD1_HUMAN YTH domain-containing family protein 1 OS=Homo sapiens (Human) OX=9606 GN=YTHDF1 PE=1 SV=1;sp|Q7Z739|YTHD3_HUMAN YTH domain-containing family protein 3 OS=Homo sapiens (Human) OX=9606 GN=YTHDF3 PE=1 SV=1	2	7	5	5	14.3	6.6	14.3	60.873	0	8.0817	1335100	4335900	20	66754	216800	563180	1937000	0	2	9	Q9BYJ9;Q7Z739	3	7	3	5	3	5	11.1	11.1	559	559;585	By matching	By MS/MS	346	480;1124;1185;1574;2293;2416;2603	False;True;True;True;True;True;False	510;1196;1260;1681;2473;2605;2809	3851;3852;3853;8656;8657;8658;8659;8660;9580;9581;9582;9583;15431;15432;15433;15434;15435;15436;15437;21914;21915;21916;21917;21918;21919;21920;22817;22818;22819;24390;24391;24392	3623;3624;3625;8260;9824;17256;17257;17258;23384;23385;23386;24022;25700;25701;25702	3625;8260;9824;17257;23385;24022;25700	304		256			-1;-1
A2RRD8;Q05481;Q96JC4;Q68DY1;Q9BRH9;P0DKX0;Q6ZNG1;Q96N58;Q96N38;Q96H40;Q9Y2Q1;Q5JVG8;Q15928;A8MTY0;B4DXR9;P0CB33;Q8IYX0;A0A1W2PQL4;O75373;Q96N22;A6NN14;Q8N4W9;O75437;Q9H8G1;P17019;Q8N7Q3;A6NNF4;Q03936;Q9UII5;Q03923;Q14593;Q8TF32;A6NK75;Q6ZR52;P17038;Q9P255;Q8TD23;Q8IYN0;Q6ZN08	Zinc finger protein 320;Zinc finger protein 91;Zinc finger protein 479;Zinc finger protein 626;Zinc finger protein 251;Zinc finger protein 728;Zinc finger protein 600;Zinc finger protein 578;Zinc finger protein 714;Zinc finger protein 486;Zinc finger protein 257;Zinc finger protein 506;Zinc finger protein 141;Putative zinc finger protein 724;Zinc finger protein 732;Putative zinc finger protein 73…	ZNF320;ZNF91;ZNF479;ZNF626;ZNF251;ZNF728;ZNF600;ZNF578;ZNF714;ZNF486;ZNF257;ZNF506;ZNF141;ZNF724P;ZNF732;ZNF735;ZNF679;ZNF737;ZNF681;ZNF729;ZNF808;ZNF254;ZNF430;ZNF708;ZNF676;ZNF726;ZNF92;ZNF107;ZNF85;ZNF273;ZNF431;ZNF98;ZNF493;ZNF43;ZNF492;ZNF675;ZNF100;ZNF66	sp|A2RRD8|ZN320_HUMAN Zinc finger protein 320 OS=Homo sapiens (Human) OX=9606 GN=ZNF320 PE=1 SV=1;sp|Q05481|ZNF91_HUMAN Zinc finger protein 91 OS=Homo sapiens (Human) OX=9606 GN=ZNF91 PE=2 SV=2;sp|Q96JC4|ZN479_HUMAN Zinc finger protein 479 OS=Homo sapiens	39	2	1	0	3.7	3.7	2	59.326	0.0030488	0.88399	1743100	2861100	24	72631	119210	2273700	2861100	1	1	8	A2RRD8;Q05481;Q96JC4;Q68DY1;Q9BRH9;P0DKX0;Q6ZNG1;Q96N58;Q96N38;Q96H40;Q9Y2Q1;Q5JVG8;Q15928;A8MTY0;B4DXR9;P0CB33;Q8IYX0;A0A1W2PQL4;O75373;Q96N22;A6NN14;Q8N4W9;O75437;Q9H8G1;P17019;Q8N7Q3;A6NNF4;Q03936;Q9UII5;Q03923;Q14593;Q8TF32;A6NK75;Q6ZR52;P17038;Q9P255;Q8TD23;Q8IYN0;Q6ZN08	2	1	1	1	0	0	2	0	509	509;1191;524;528;671;622;722;590;554;463;563;444;474;619;585;412;411;384;536;645;1252;903;659;570;499;588;738;586;783;595;569;576;572;646;809;531;568;542;573	By MS/MS	By MS/MS	4	1219;2430	True;False	1296;2619	10010;10011;10012;10013;10014;10015;10016;10017;10018;22895;22896;22897;22898;22899	10369;10370;10371;10372;10373;10374;10375;10376;24112;24113;24114;24115;24116	10373;24116						-1;-1;-1;-1;-1;-1;-1;-1;-1;-1;-1;-1;-1;-1;-1;-1;-1;-1;-1;-1;-1;-1;-1;-1;-1;-1;-1;-1;-1;-1;-1;-1;-1;-1;-1;-1;-1;-1;-1
P00735	Prothrombin;Activation peptide fragment 1;Activation peptide fragment 2;Thrombin light chain;Thrombin heavy chain	F2	sp|P00735|THRB_BOVIN Prothrombin OS=Bos taurus GN=F2 PE=1 SV=2	2	2	2	2	3.9	1.4	1.4	70.036	0	2.6838	6624600	9009300	33	200750	273010	6717800	7024300	1	1	8	P00734;CON__sp|P00735|THRB_BOVIN	1	1	1	1	1	1	3.9	3.9	622	622;625	By MS/MS	By MS/MS	7	850;3085	True;True	908;3331	6665;28353;28354;28355;28356;28357;28358;28359;28360;28361;28362;28363;28364	6666;29772;29773;29774;29775;29776;29777;29778	6666;29773	3		574		+	-1;-1
P11021	78 kDa glucose-regulated protein	HSPA5	sp|P11021|BIP_HUMAN Endoplasmic reticulum chaperone BiP OS=Homo sapiens (Human) OX=9606 GN=HSPA5 PE=1 SV=2	1	8	6	6	12.7	6.3	8.9	72.332	0	59.312	1604600	2689200	30	53486	89640	913750	887120	0	0	8	P11021	5	6	3	4	3	4	11.6	11.6	654	654	By MS/MS	By MS/MS	113	1222;1224;1332;1627;2036;2065;2528;3037	False;True;True;False;True;True;True;True	1299;1301;1425;1736;2203;2236;2729;3280	10028;10029;10030;10031;10032;10033;10034;10035;10036;10037;10038;10039;10040;10041;10042;10043;10061;10062;10063;10064;10065;10066;10067;12966;12967;12968;12969;12970;12971;12972;12973;12974;15778;15779;15780;15781;15782;15783;15784;15785;15786;20019;20020;20289;20290;20291;20292;20293;20294;20295;20296;20297;23808;23809;23810;23811;23812;23813;27987;27988	10385;10386;10387;10388;10389;10390;10391;10392;10411;14581;14582;17488;17489;17490;17491;17492;17493;17494;17495;17496;21742;21934;25264;29333;29334	10385;10411;14582;17494;21742;21934;25264;29334						-1
P14866	Heterogeneous nuclear ribonucleoprotein L	HNRNPL	sp|P14866|HNRPL_HUMAN Heterogeneous nuclear ribonucleoprotein L OS=Homo sapiens (Human) OX=9606 GN=HNRNPL PE=1 SV=2	1	5	5	5	12.4	0	3.7	64.132	0	9.3156	0	1172800	20	0	58640	0	727420	0	0	8	P14866	0	2	0	2	0	2	12.4	12.4	589	589		By MS/MS	121	1308;1898;1954;2359;2564	True;True;True;True;True	1398;2030;2110;2547;2769	12240;12241;12242;12243;18140;19410;19411;22428;22429;22430;22431;24088;24089;24090;24091;24092	13442;13443;13444;19711;21228;23753;25475;25476	13444;19711;21228;23753;25475						-1
P19525	Interferon-induced, double-stranded RNA-activated protein kinase	EIF2AK2	sp|P19525|E2AK2_HUMAN Interferon-induced, double-stranded RNA-activated protein kinase OS=Homo sapiens (Human) OX=9606 GN=EIF2AK2 PE=1 SV=2	1	4	4	4	8.2	5.8	8.2	62.094	0	1.3606	1821300	8102800	21	86727	385850	1047500	3456700	0	2	8	P19525	3	4	3	4	3	4	8.2	8.2	551	551	By matching	By MS/MS	131	426;1183;1437;1533	True;True;True;True	451;1258;1536;1638	3247;3248;3249;3250;3251;3252;3253;9564;9565;9566;9567;9568;9569;9570;9571;9572;14418;14419;14420;14421;14422;15117;15118;15119;15120;15121;15122	2867;9819;9820;9821;16454;16455;17049;17050	2867;9819;16455;17049						-1
P68133;P68032;P62736;P63267	Actin, alpha skeletal muscle;Actin, alpha cardiac muscle 1;Actin, aortic smooth muscle;Actin, gamma-enteric smooth muscle	ACTA1;ACTC1;ACTA2;ACTG2	sp|P68133|ACTS_HUMAN Actin, alpha skeletal muscle OS=Homo sapiens (Human) OX=9606 GN=ACTA1 PE=1 SV=1;sp|P68032|ACTC_HUMAN Actin, alpha cardiac muscle 1 OS=Homo sapiens (Human) OX=9606 GN=ACTC1 PE=1 SV=1;sp|P62736|ACTA_HUMAN Actin, aortic smooth muscle OS=H	4	11	1	1	28.1	28.1	28.1	42.051	0	5.4802	10407000	26265000	20	520340	1313200	11047000	22026000	1	2	8	P68133;P68032;P62736;P63267	11	11	1	1	1	1	4.2	4.2	377	377;377;377;376	By MS/MS	By MS/MS	180	101;295;296;434;468;469;602;1109;1348;2596;3131	False;False;False;False;False;False;False;False;False;False;True	108;312;313;459;496;497;641;642;1179;1180;1442;2802;3379;3380	766;767;768;769;770;771;772;773;774;2345;2346;2347;2348;2349;2350;2351;2352;2353;2354;2355;2356;2357;2358;2359;2360;2361;2362;2363;2364;2365;2366;2367;2368;3276;3277;3278;3279;3280;3281;3282;3283;3284;3725;3726;3727;3728;3729;3730;3731;3732;3733;3734;3735;3736;3737;3738;3739;3740;3741;3742;3743;3744;3745;3746;3747;3748;3749;3750;4938;4939;4940;4941;4942;4943;4944;4945;4946;4947;4948;4949;4950;495…	813;814;815;816;817;818;819;820;821;822;823;824;2206;2207;2208;2209;2210;2211;2212;2213;2214;2215;2216;2217;2218;2219;2220;2221;2222;2223;2224;2225;2226;2227;2879;2880;2881;2882;2883;3443;3444;3445;3446;3447;3448;3449;3450;3451;3452;3453;3454;3455;3456;3457;3458;3459;3460;3461;3462;3463;3464;3465;3466;3467;3468;3469;3470;4805;4806;4807;4808;4809;4810;4811;4812;4813;4814;4815;4816;4817;4818;4819;4…	815;2206;2211;2879;3444;3454;4821;8205;14644;25668;30046	196;197;198;201		46;49;84;327			-1;-1;-1;-1
Q02078;Q14814;Q06413	Myocyte-specific enhancer factor 2A;Myocyte-specific enhancer factor 2D;Myocyte-specific enhancer factor 2C	MEF2A;MEF2D;MEF2C	sp|Q02078|MEF2A_HUMAN Myocyte-specific enhancer factor 2A OS=Homo sapiens (Human) OX=9606 GN=MEF2A PE=1 SV=1;sp|Q14814|MEF2D_HUMAN Myocyte-specific enhancer factor 2D OS=Homo sapiens (Human) OX=9606 GN=MEF2D PE=1 SV=1;sp|Q06413|MEF2C_HUMAN Myocyte-specific	3	4	4	4	10.3	0	0	54.811	0	26.01	0	0	15	0	0	0	0	0	0	8	Q02078;Q14814;Q06413	0	0	0	0	0	0	10.3	10.3	507	507;521;473			189	853;1588;2732;3149	True;True;True;True	911;1695;1696;2947;3398	6677;6678;6679;6680;15520;15521;15522;25296;25297;28790;28791;28792;28793;28794	6677;6678;17300;17301;26553;30161;30162;30163	6678;17300;26553;30162	205		62			-1;-1;-1
Q03518	Antigen peptide transporter 1	TAP1	sp|Q03518|TAP1_HUMAN Antigen peptide transporter 1 OS=Homo sapiens (Human) OX=9606 GN=TAP1 PE=1 SV=2	1	2	2	2	3.1	1.4	3.1	87.217	0	2.4369	2282600	6858000	37	61692	185350	3018400	3377400	1	1	8	Q03518	1	2	1	2	1	2	3.1	3.1	808	808	By MS/MS	By MS/MS	193	2216;2385	True;True	2392;2573	21423;21424;21425;21426;22604;22605;22606;22607;22608;22609;22610;22611;22612	22975;23877;23878;23879;23880;23881;23882;23883;23884	22975;23877						-1
Q7Z417	Nuclear fragile X mental retardation-interacting protein 2	NUFIP2	sp|Q7Z417|NUFP2_HUMAN Nuclear fragile X mental retardation-interacting protein 2 OS=Homo sapiens (Human) OX=9606 GN=NUFIP2 PE=1 SV=1	1	3	3	3	5	5	3.2	76.12	0	4.3926	3046600	1837400	26	117180	70669	1658100	1893800	1	2	8	Q7Z417	3	2	3	2	3	2	5	5	695	695	By MS/MS	By MS/MS	276	236;1122;2008	True;True;True	250;1194;2170	1878;1879;1880;1881;1882;1883;1884;1885;1886;8644;8645;8646;8647;8648;8649;8650;8651;8652;8653;8654;19797;19798;19799;19800;19801;19802	1841;8253;8254;8255;8256;8257;8258;21552	1841;8253;21552						-1
Q86UU0	B-cell CLL/lymphoma 9-like protein	BCL9L	sp|Q86UU0|BCL9L_HUMAN B-cell CLL/lymphoma 9-like protein OS=Homo sapiens (Human) OX=9606 GN=BCL9L PE=1 SV=1	1	6	6	6	4.7	0	0	157.13	0	3.6418	0	0	49	0	0	0	0	0	0	8	Q86UU0	0	0	0	0	0	0	4.7	4.7	1499	1499			281	49;203;518;2030;2493;2592	True;True;True;True;True;True	51;216;552;2197;2689;2798	302;303;304;1631;1632;4154;4155;4156;19996;23578;23579;23580;24331;24332	182;1599;3898;3899;21719;25141;25650;25651	182;1599;3898;21719;25141;25650						-1
Q96G03	Phosphoglucomutase-2	PGM2	sp|Q96G03|PGM2_HUMAN Phosphoglucomutase-2 OS=Homo sapiens (Human) OX=9606 GN=PGM2 PE=1 SV=4	1	8	8	8	17.2	2.6	1.5	68.283	0	4.3457	1572500	1585600	34	46249	46635	1280500	967630	0	0	8	Q96G03	2	1	2	1	2	1	17.2	17.2	612	612	By matching	By MS/MS	319	24;27;79;435;754;1341;1621;2007	True;True;True;True;True;True;True;True	25;28;85;460;807;1435;1730;2169	158;168;169;170;558;559;560;3285;3286;5973;5974;5975;5976;13028;13029;15732;15733;15734;19790;19791;19792;19793;19794;19795;19796	109;114;606;2884;5676;14619;17455;21550;21551	109;114;606;2884;5676;14619;17455;21551						-1
Q96ME7	Zinc finger protein 512	ZNF512	sp|Q96ME7|ZN512_HUMAN Zinc finger protein 512 OS=Homo sapiens (Human) OX=9606 GN=ZNF512 PE=1 SV=2	1	2	2	2	5.6	5.6	5.6	64.681	0	1.8555	3438100	7642800	23	149480	332300	2580900	4291000	1	2	8	Q96ME7	2	2	2	2	2	2	5.6	5.6	567	567	By MS/MS	By MS/MS	324	1241;1591	True;True	1322;1699	10562;10563;10564;10565;10566;10567;10568;10569;10570;15535;15536;15537;15538;15539;15540;15541	11220;11221;11222;11223;11224;17307;17308;17309	11223;17307						-1
Q96P47	Arf-GAP with GTPase, ANK repeat and PH domain-containing protein 3	AGAP3	sp|Q96P47|AGAP3_HUMAN Arf-GAP with GTPase, ANK repeat and PH domain-containing protein 3 OS=Homo sapiens (Human) OX=9606 GN=AGAP3 PE=1 SV=2	2	5	5	5	7.1	0	0	95.043	0	55.106	0	0	32	0	0	0	0	0	0	8	Q96P47;Q9UPQ3	0	0	0	0	0	0	7.1	7.1	875	875;857			327	284;1159;1176;2865;3120	True;True;True;True;True	299;1232;1251;3093;3367	2232;2233;2234;8985;8986;8987;9529;26645;26646;26647;28596;28597;28598	2119;2120;2121;8691;8692;9800;28115;29987	2121;8691;9800;28115;29987						-1;-1
P01685	Ig kappa chain V region 4135		sp|P01685|KV04_RABIT Ig kappa chain V region 4135 OS=Oryctolagus cuniculus PE=1 SV=1	2	1	1	1	10.3	10.3	10.3	11.182	0	2.5542	1334900000	1258600000	3	444980000	419520000	1741300000	1258600000	1	1	7	CON__sp|P01685|KV04_RABIT;CON__sp|P01695|KV14_RABIT	1	1	1	1	1	1	10.3	10.3	107	107;109	By MS/MS	By MS/MS	10	264	TRUE	278	2093;2094;2095;2096;2097;2098;2099	2001;2002;2003;2004;2005;2006;2007	2006					+	-1;-1
O75140	DEP domain-containing protein 5	DEPDC5	sp|O75140|DEPD5_HUMAN GATOR complex protein DEPDC5 OS=Homo sapiens (Human) OX=9606 GN=DEPDC5 PE=1 SV=2	1	1	1	1	0.9	0.9	0.9	181.26	0.002924	0.63582	10537000	5922700	75	140490	78969	8654000	5810500	0	1	7	O75140	1	1	1	1	1	1	0.9	0.9	1603	1603	By matching	By MS/MS	71	2802	TRUE	3026	26033;26034;26035;26036;26037;26038;26039;26040;26041;26042;26043	27381;27382;27383;27384;27385;27386;27387	27384						-1
P02081	Hemoglobin subunit beta;LVV-hemorphin-7;Spinorphin;Hemoglobin subunit delta;Hemoglobin subunit gamma-2;Hemoglobin subunit gamma-1;Hemoglobin subunit epsilon	HBB;HBD;HBG2;HBG1;HBE1	sp|P02081|HBBF_BOVIN Hemoglobin fetal subunit beta OS=Bos taurus PE=1 SV=1	7	2	2	2	15	15	15	15.998	0.0029851	0.7587	2803100	3188800	11	254830	289890	1899400	2012400	2	1	7	P68871;P02042;P69892;P69891;P02100;CON__sp|P02081|HBBF_BOVIN;CON__sp|P02070|HBB_BOVIN	2	2	2	2	2	2	15	15	147	147;147;147;147;147;145;145	By MS/MS	By MS/MS	85	1699;3015	True;True	1814;3256	16553;16554;16555;16556;16557;16558;16559;16560;16561;27869;27870;27871;27872;27873	18238;18239;18240;18241;18242;18243;29258	18239;29258					+	-1;-1;-1;-1;-1;-1;-1
Q3SX14	Gelsolin	GSN	sp|Q3SX14|GELS_BOVIN Gelsolin OS=Bos taurus GN=GSN PE=2 SV=1	2	4	4	4	6	6	6	85.696	0	33.577	5281100	14442000	34	155330	424750	2430200	6938500	1	4	7	P06396;CON__sp|Q3SX14|GELS_BOVIN	4	4	4	4	4	4	6	6	782	782;731	By MS/MS	By MS/MS	94	97;2215;2656;3099	True;True;True;True	104;2391;2865;3346	739;740;741;742;743;744;745;746;21420;21421;21422;24733;24734;28452;28453;28454;28455	802;803;804;805;22974;26014;29844	804;22974;26014;29844					+	-1;-1
P10398	Serine/threonine-protein kinase A-Raf	ARAF	sp|P10398|ARAF_HUMAN Serine/threonine-protein kinase A-Raf OS=Homo sapiens (Human) OX=9606 GN=ARAF PE=1 SV=2	1	6	6	5	10.2	10.2	10.2	67.585	0	4.1655	37680000	52288000	33	1141800	1584500	39568000	129100000	1	4	7	P10398	6	6	6	6	5	5	10.2	8.7	606	606	By MS/MS	By MS/MS	109	396;955;1192;2341;2481;2993	True;True;True;True;True;True	417;1015;1267;2528;2677;3233	2991;2992;2993;2994;2995;2996;2997;7504;7505;7506;7507;7508;7509;7510;9613;9614;9615;22316;22317;22318;22319;22320;22321;22322;23507;23508;23509;23510;23511;23512;23513;23514;23515;27713;27714;27715;27716	2681;7421;7422;9842;9843;9844;23684;23685;23686;25107;29085	2681;7421;9842;23684;25107;29085						-1
P41214	Eukaryotic translation initiation factor 2D	EIF2D	sp|P41214|EIF2D_HUMAN Eukaryotic translation initiation factor 2D OS=Homo sapiens (Human) OX=9606 GN=EIF2D PE=1 SV=3	1	5	5	5	8.7	0	0	64.706	0	2.4766	0	0	32	0	0	0	0	0	0	7	P41214	0	0	0	0	0	0	8.7	8.7	584	584			157	858;1006;1094;1433;2483	True;True;True;True;True	917;1071;1164;1531;2679	6719;6720;7858;8438;14389;14390;14391;23520;23521;23522;23523	6723;7690;8136;16435;25110;25111;25112	6723;7690;8136;16435;25111						-1
Q08188	Protein-glutamine gamma-glutamyltransferase E;Protein-glutamine gamma-glutamyltransferase E 50 kDa catalytic chain;Protein-glutamine gamma-glutamyltransferase E 27 kDa non-catalytic chain	TGM3	sp|Q08188|TGM3_HUMAN Protein-glutamine gamma-glutamyltransferase E OS=Homo sapiens (Human) OX=9606 GN=TGM3 PE=1 SV=4	1	6	6	6	9.5	2.3	2.3	76.631	0	15.071	30393000	37256000	40	759830	931390	40335000	39101000	0	0	7	Q08188	1	1	1	1	1	1	9.5	9.5	693	693	By MS/MS	By MS/MS	202	813;1336;2057;2105;2527;2908	True;True;True;True;True;True	869;1429;2227;2278;2728;3140	6363;12994;20235;20236;20613;23799;23800;23801;23802;23803;23804;23805;23806;23807;26958;26959;26960	6008;14594;21906;22247;25263;28354;28355	6008;14594;21906;22247;25263;28355						-1
Q13867	Bleomycin hydrolase	BLMH	sp|Q13867|BLMH_HUMAN Bleomycin hydrolase OS=Homo sapiens (Human) OX=9606 GN=BLMH PE=1 SV=1	1	6	6	6	14.3	0	0	52.562	0	5.0368	0	0	26	0	0	0	0	0	0	7	Q13867	0	0	0	0	0	0	14.3	14.3	455	455			217	231;1190;2012;2721;2722;2854	True;True;True;True;True;True	245;1265;2174;2935;2936;3082	1841;1842;9605;9606;9607;19832;19833;25233;25234;25235;25236;26570	1797;9839;9840;21576;26485;26486;28083	1797;9839;21576;26485;26486;28083						-1
Q14974	Importin subunit beta-1	KPNB1	sp|Q14974|IMB1_HUMAN Importin subunit beta-1 OS=Homo sapiens (Human) OX=9606 GN=KPNB1 PE=1 SV=2	1	2	2	2	2.6	2.6	2.6	97.169	0	14.272	1623900	1904700	40	40597	47617	1214300	1163900	1	0	7	Q14974	2	2	2	2	2	2	2.6	2.6	876	876	By MS/MS	By MS/MS	227	627;1489	True;True	667;1591	5105;5106;5107;5108;5109;5110;14762;14763;14764;14765;14766;14767;14768;14769;14770	4949;16720;16721;16722;16723;16724;16725	4949;16720						-1
Q5TYW1;Q4V348	Zinc finger protein 658;Zinc finger protein 658B	ZNF658;ZNF658B	sp|Q5TYW1|ZN658_HUMAN Zinc finger protein 658 OS=Homo sapiens (Human) OX=9606 GN=ZNF658 PE=1 SV=2;sp|Q4V348|Z658B_HUMAN Zinc finger protein 658B OS=Homo sapiens (Human) OX=9606 GN=ZNF658B PE=2 SV=1	6	3	2	2	4.2	2.8	2.8	122.27	0	5.3971	2211600	2752700	64	34556	43011	10595000	10110000	1	1	7	Q5TYW1;Q4V348;Q9UJW8;Q9HCZ1;Q96ND8;Q8NB42	2	2	1	1	1	1	2.8	2.8	1059	1059;819;692;680;569;609	By MS/MS	By MS/MS	259	1199;1202;1203	False;True;True	1274;1277;1278	9664;9665;9666;9667;9668;9669;9670;9671;9672;9673;9674;9675;9676;9677;9678;9679;9680;9681;9692;9693;9694;9695;9696;9697;9698	9886;9887;9888;9889;9890;9891;9892;9893;9894;9895;9896;9897;9898;9899;9900;9901;9902;9903;9914;9915;9916;9917;9918;9919;9920	9889;9914;9916						-1;-1;-1;-1;-1;-1
Q68EM7	Rho GTPase-activating protein 17	ARHGAP17	sp|Q68EM7|RHG17_HUMAN Rho GTPase-activating protein 17 OS=Homo sapiens (Human) OX=9606 GN=ARHGAP17 PE=1 SV=1	1	4	4	4	5.7	0	0	95.436	0	13.483	0	0	34	0	0	0	0	0	0	7	Q68EM7	0	0	0	0	0	0	5.7	5.7	881	881			263	1524;1831;2549;2646	True;True;True;True	1629;1954;2753;2855	15028;15029;15030;17570;17571;17572;23992;23993;23994;24683;24684;24685	16976;16977;19143;25416;25417;25418;25964	16976;19143;25416;25964						-1
Q765P7	MTSS1-like protein	MTSS1L	sp|Q765P7|MTSS2_HUMAN Protein MTSS 2 OS=Homo sapiens (Human) OX=9606 GN=MTSS2 PE=1 SV=1	1	3	3	3	4.6	4.6	4.6	79.928	0	1.9954	5699300	5900200	27	211080	218530	3414700	2814900	2	2	7	Q765P7	3	3	3	3	3	3	4.6	4.6	747	747	By MS/MS	By MS/MS	274	25;2050;2878	True;True;True	26;2220;3107	159;160;161;162;20176;20177;20178;20179;20180;20181;26731;26732;26733;26734;26735;26736	110;111;112;21875;21876;21877;21878;28197;28198	110;21878;28198						-1
Q9NVN8	Guanine nucleotide-binding protein-like 3-like protein	GNL3L	sp|Q9NVN8|GNL3L_HUMAN Guanine nucleotide-binding protein-like 3-like protein OS=Homo sapiens (Human) OX=9606 GN=GNL3L PE=1 SV=1	1	6	6	6	12	8.4	7.9	65.572	0	7.0995	4348100	5728100	31	140260	184780	1959500	1671500	1	0	7	Q9NVN8	4	4	4	4	4	4	12	12	582	582	By MS/MS	By MS/MS	371	300;895;1492;2558;2680;2959	True;True;True;True;True;True	317;955;1594;2763;2891;3198	2403;7085;7086;7087;7088;7089;7090;14782;14783;14784;14785;24054;24055;24056;24057;24058;24059;24060;24061;24942;24943;24944;24945;27415;27416;27417;27418;27419;27420;27421	2243;7193;16732;25461;26286;28723;28724	2243;7193;16732;25461;26286;28724						-1
Q9NVU0	DNA-directed RNA polymerase III subunit RPC5	POLR3E	sp|Q9NVU0|RPC5_HUMAN DNA-directed RNA polymerase III subunit RPC5 OS=Homo sapiens (Human) OX=9606 GN=POLR3E PE=1 SV=1	1	1	1	1	1.4	1.4	1.4	79.897	0.0029674	0.73487	3095300	4752900	41	75495	115920	3873600	4782200	0	1	7	Q9NVU0	1	1	1	1	1	1	1.4	1.4	708	708	By MS/MS	By MS/MS	372	238	TRUE	252	1891;1892;1893;1894;1895;1896;1897;1898;1899	1843;1844;1845;1846;1847;1848;1849	1843						-1
Q9UHB9	Signal recognition particle subunit SRP68	SRP68	sp|Q9UHB9|SRP68_HUMAN Signal recognition particle subunit SRP68 OS=Homo sapiens (Human) OX=9606 GN=SRP68 PE=1 SV=2	1	4	4	4	8.5	0	0	70.729	0	16.68	0	0	34	0	0	0	0	0	0	7	Q9UHB9	0	0	0	0	0	0	8.5	8.5	627	627			385	165;758;839;2848	True;True;True;True	173;811;897;3076	1220;1221;1222;5990;5991;6591;6592;6593;6594;6595;6596;26541	1173;1174;5684;5685;6608;6609;28056	1173;5684;6609;28056						-1
P01697	Ig kappa chain V region AH80-5		sp|P01697|KV16_RABIT Ig kappa chain V region AH80-5 OS=Oryctolagus cuniculus PE=1 SV=1	1	2	1	1	20.2	20.2	20.2	11.883	0.0030864	0.92264	840760	1287300	5	168150	257450	1096700	1287300	1	1	6	CON__sp|P01697|KV16_RABIT	2	2	1	1	1	1	8.8	8.8	114	114	By MS/MS	By MS/MS	12	1343;1814	True;False	1437;1937	13038;13039;13040;13041;13042;13043;17482;17483;17484;17485;17486;17487	14621;14622;14623;14624;14625;14626;19106	14623;19106	5		3		+	-1
P01847	Ig lambda chain C region		sp|P01847|LAC_RABIT Ig lambda chain C region OS=Oryctolagus cuniculus PE=1 SV=2	1	2	2	2	33.3	0	0	11.484	0	54.077	0	0	6	0	0	0	0	0	0	6	CON__sp|P01847|LAC_RABIT	0	0	0	0	0	0	33.3	33.3	105	105			15	43;2602	True;True	44;2808	256;257;258;24387;24388;24389	151;152;153;25697;25698;25699	152;25697					+	-1
Q7RTS7	Keratin, type II cytoskeletal 74;Keratin, type II cytoskeletal 73;Keratin, type II cytoskeletal 71;Keratin, type II cytoskeletal 72	KRT74;KRT73;KRT71;KRT72	sp|Q7RTS7|K2C74_HUMAN Keratin, type II cytoskeletal 74 OS=Homo sapiens GN=KRT74 PE=1 SV=2	9	5	1	1	7.2	3.4	2.8	57.865	0	5.4183	0	0	30	0	0	0	0	0	0	6	Q7RTS7;Q86Y46;CON__sp|Q7RTS7|K2C74_HUMAN;CON__sp|Q86Y46|K2C73_HUMAN;Q3SY84;Q14CN4;CON__sp|Q14CN4|K2C72_HUMAN;CON__sp|Q6IME9|K2C72_MOUSE;CON__sp|Q3SY84|K2C71_HUMAN	3	2	0	0	0	0	2.3	2.3	529	529;540;529;540;523;511;511;520;523	By matching	By matching	41	225;737;738;783;1427	False;False;False;True;False	239;789;790;837;1525	1798;1799;1800;1801;1802;5868;5869;5870;5871;5872;5873;5874;5875;5876;5877;5878;5879;5880;6166;6167;6168;6169;6170;6171;6172;14267;14268;14269;14270;14271;14272;14273;14274;14275;14276;14277;14278	1763;5589;5590;5591;5592;5593;5594;5595;5596;5597;5598;5599;5600;5601;5602;5603;5604;5605;5606;5839;5840;5841;5842;5843;5844;16180;16181;16182;16183;16184;16185;16186	1763;5592;5604;5842;16185					+	-1;-1;-1;-1;-1;-1;-1;-1;-1
F1N076	Ceruloplasmin	CP	tr|F1N076|F1N076_BOVIN Uncharacterized protein OS=Bos taurus GN=CP PE=1 SV=2	2	1	1	1	0.9	0.9	0.9	122.2	0.0080863	0.2486	1172200	1566000	47	24940	33319	1528900	1566000	1	1	6	P00450;CON__tr|F1N076|F1N076_BOVIN	1	1	1	1	1	1	0.9	0.9	1065	1065;1085	By MS/MS	By MS/MS	47	1355	TRUE	1449	13138;13139;13140;13141;13142;13143	14693;14694;14695;14696;14697;14698	14694					+	-1;-1
O00203	AP-3 complex subunit beta-1	AP3B1	sp|O00203|AP3B1_HUMAN AP-3 complex subunit beta-1 OS=Homo sapiens (Human) OX=9606 GN=AP3B1 PE=1 SV=3	1	2	2	2	2	2	2	121.32	0	2.6429	2479300	2496900	55	45077	45399	2542400	1858400	1	2	6	O00203	2	2	2	2	2	2	2	2	1094	1094	By MS/MS	By MS/MS	49	1656;1694	True;True	1767;1809	16043;16044;16045;16046;16047;16048;16049;16050;16051;16322;16323;16324;16325;16326;16327;16328;16329	17775;17776;17777;18004;18005;18006	17775;18006						-1
P01031	Complement C5;Complement C5 beta chain;Complement C5 alpha chain;C5a anaphylatoxin;Complement C5 alpha chain	C5	sp|P01031|CO5_HUMAN Complement C5 OS=Homo sapiens (Human) OX=9606 GN=C5 PE=1 SV=4	1	2	2	2	1.5	1.5	1.5	188.3	0	43.047	3412900	5282700	84	40630	62889	2436600	2842700	0	1	6	P01031	2	2	2	2	2	2	1.5	1.5	1676	1676	By matching	By MS/MS	83	639;3040	True;True	679;3283	5187;5188;5189;5190;5191;5192;28000;28001;28002;28003;28004;28005	5005;5006;5007;5008;5009;29344	5006;29344						-1
P11166	Solute carrier family 2, facilitated glucose transporter member 1	SLC2A1	sp|P11166|GTR1_HUMAN Solute carrier family 2, facilitated glucose transporter member 1 OS=Homo sapiens (Human) OX=9606 GN=SLC2A1 PE=1 SV=2	1	1	1	1	2	2	2	54.083	0.003012	0.85929	1639500	2250000	13	126110	173080	2197000	2311600	1	1	6	P11166	1	1	1	1	1	1	2	2	492	492	By MS/MS	By MS/MS	115	2648	TRUE	2857	24689;24690;24691;24692;24693;24694;24695;24696;24697	25968;25969;25970;25971;25972;25973	25969						-1
P26641	Elongation factor 1-gamma	EEF1G	sp|P26641|EF1G_HUMAN Elongation factor 1-gamma OS=Homo sapiens (Human) OX=9606 GN=EEF1G PE=1 SV=3	1	1	1	1	3	3	3	50.118	0	12.139	532600	750320	24	22192	31263	711670	768640	1	1	6	P26641	1	1	1	1	1	1	3	3	437	437	By MS/MS	By MS/MS	138	14	TRUE	15	107;108;109;110;111;112;113;114;115	80;81;82;83;84;85	82						-1
P31939	Bifunctional purine biosynthesis protein PURH;Phosphoribosylaminoimidazolecarboxamide formyltransferase;IMP cyclohydrolase	ATIC	sp|P31939|PUR9_HUMAN Bifunctional purine biosynthesis protein PURH OS=Homo sapiens (Human) OX=9606 GN=ATIC PE=1 SV=3	1	6	6	6	12	0	0	64.615	0	3.7804	0	0	38	0	0	0	0	0	0	6	P31939	0	0	0	0	0	0	12	12	592	592			145	156;497;1548;2719;3014;3153	True;True;True;True;True;True	163;529;1653;2933;3255;3402	1175;3990;15230;25225;27868;28806	1148;3746;17114;26481;29257;30169	1148;3746;17114;26481;29257;30169						-1
Q06124	Tyrosine-protein phosphatase non-receptor type 11	PTPN11	sp|Q06124|PTN11_HUMAN Tyrosine-protein phosphatase non-receptor type 11 OS=Homo sapiens (Human) OX=9606 GN=PTPN11 PE=1 SV=3	1	6	6	6	11.1	2	6.2	68.01	0	3.9874	142790	2452600	38	3757.7	64542	163140	854330	0	0	6	Q06124	1	3	1	3	1	3	11.1	11.1	593	593	By matching	By matching	197	690;744;1081;1287;2413;2509	True;True;True;True;True;True	740;797;1150;1377;2602;2709	5588;5589;5590;5591;5916;5917;5918;5919;8390;8391;12104;12105;12106;22794;22795;22796;22797;22798;23680;23681;23682;23683;23684	5384;5624;8108;13341;24004;25187	5384;5624;8108;13341;24004;25187	212		504			-1
Q14651	Plastin-1	PLS1	sp|Q14651|PLSI_HUMAN Plastin-1 OS=Homo sapiens (Human) OX=9606 GN=PLS1 PE=1 SV=2	1	9	6	6	17.6	15.7	9.9	70.253	0	7.2208	3465700	1527100	36	96270	42421	1661800	1246400	1	0	6	Q14651	7	5	4	2	4	2	12.1	12.1	629	629	By MS/MS	By matching	224	310;660;884;1258;1349;1799;1903;2131;2247	False;True;True;True;True;False;True;False;True	328;702;944;1342;1443;1920;2038;2305;2424	2449;2450;2451;2452;2453;2454;2455;2456;5301;7026;7027;7028;11455;13089;13090;13091;13092;13093;13094;13095;13096;17355;17356;17357;17358;17359;17360;17361;17362;17363;18216;18217;18218;18219;18220;20767;20768;20769;20770;20771;20772;20773;20774;20775;21635;21636;21637;21638;21639;21640;21641;21642	2267;2268;2269;2270;2271;2272;2273;2274;5076;7155;12257;14654;14655;14656;14657;18953;18954;18955;18956;19963;22378;22379;22380;22381;22382;23173;23174	2271;5076;7155;12257;14656;18954;19963;22382;23173	241		168			-1
Q16666	Gamma-interferon-inducible protein 16	IFI16	sp|Q16666|IF16_HUMAN Gamma-interferon-inducible protein 16 OS=Homo sapiens (Human) OX=9606 GN=IFI16 PE=1 SV=3	1	1	1	1	2.2	2.2	2.2	88.255	0.0083565	0.32848	588270	729020	37	15899	19703	743930	739930	0	2	6	Q16666	1	1	1	1	1	1	2.2	2.2	785	785	By matching	By MS/MS	242	1178	TRUE	1253	9537;9538;9539;9540;9541;9542;9543	9805;9806;9807;9808;9809;9810	9807						-1
Q9BRR0;Q6ZMV8;Q96LW9;Q5JNZ3	Zinc finger protein with KRAB and SCAN domains 3;Putative zinc finger protein 730;Zinc finger and SCAN domain-containing protein 31;Zinc finger protein 311	ZKSCAN3;ZNF730;ZSCAN31;ZNF311	sp|Q9BRR0|ZKSC3_HUMAN Zinc finger protein with KRAB and SCAN domains 3 OS=Homo sapiens (Human) OX=9606 GN=ZKSCAN3 PE=1 SV=2;sp|Q6ZMV8|ZN730_HUMAN Putative zinc finger protein 730 OS=Homo sapiens (Human) OX=9606 GN=ZNF730 PE=2 SV=1;sp|Q96LW9|ZSC31_HUMAN Zin	4	1	1	1	2.8	2.8	2.8	60.64	0	3.4718	4889200	4035200	29	168590	139150	6377400	4035200	1	1	6	Q9BRR0;Q6ZMV8;Q96LW9;Q5JNZ3	1	1	1	1	1	1	2.8	2.8	538	538;503;406;666	By MS/MS	By MS/MS	251	1201	TRUE	1276	9686;9687;9688;9689;9690;9691	9908;9909;9910;9911;9912;9913	9910						-1;-1;-1;-1
Q5T1V6	Probable ATP-dependent RNA helicase DDX59	DDX59	sp|Q5T1V6|DDX59_HUMAN Probable ATP-dependent RNA helicase DDX59 OS=Homo sapiens (Human) OX=9606 GN=DDX59 PE=1 SV=1	1	4	4	4	7.1	3.7	5.5	68.809	0.0029326	0.66671	1640500	2620100	35	46870	74861	944600	944320	0	0	6	Q5T1V6	2	3	2	3	2	3	7.1	7.1	619	619	By matching	By matching	254	463;1590;2608;2747	True;True;True;True	491;1698;2814;2963	3683;3684;3685;3686;15529;15530;15531;15532;15533;15534;24437;24438;24439;24440;24441;25395;25396;25397;25398;25399;25400;25401	3417;17306;25754;26624;26625;26626	3417;17306;25754;26626						-1
Q9BPZ7	Target of rapamycin complex 2 subunit MAPKAP1	MAPKAP1	sp|Q9BPZ7|SIN1_HUMAN Target of rapamycin complex 2 subunit MAPKAP1 OS=Homo sapiens (Human) OX=9606 GN=MAPKAP1 PE=1 SV=2	1	5	5	5	9.8	5.2	9.8	59.122	0	1.4356	1119100	6724300	24	46631	280180	880660	2757800	0	1	6	Q9BPZ7	2	4	2	4	2	4	9.8	9.8	522	522	By matching	By MS/MS	336	762;1157;1269;1404;1828	True;True;True;True;True	816;1230;1357;1501;1951	6028;6029;6030;6031;6032;6033;6034;8983;11604;11605;11606;11607;11608;11609;11610;13585;13586;13587;13588;17560;17561;17562	5730;5731;8689;12536;15081;19140	5730;8689;12536;15081;19140						-1
Q9BWT3	Poly(A) polymerase gamma	PAPOLG	sp|Q9BWT3|PAPOG_HUMAN Poly(A) polymerase gamma OS=Homo sapiens (Human) OX=9606 GN=PAPOLG PE=1 SV=2	1	1	1	1	1.4	1.4	1.4	82.802	0.0083799	0.34363	321950	554780	42	7665.4	13209	408880	573010	0	1	6	Q9BWT3	1	1	1	1	1	1	1.4	1.4	736	736	By matching	By MS/MS	345	2361	TRUE	2549	22437;22438;22439;22440;22441;22442;22443;22444;22445	23755;23756;23757;23758;23759;23760	23757						-1
Q9H0H5	Rac GTPase-activating protein 1	RACGAP1	sp|Q9H0H5|RGAP1_HUMAN Rac GTPase-activating protein 1 OS=Homo sapiens (Human) OX=9606 GN=RACGAP1 PE=1 SV=1	1	5	5	5	7.9	6	7.9	71.026	0	27.138	3724100	26821000	33	112850	812750	1051600	14951000	0	6	6	Q9H0H5	3	5	3	5	3	5	7.9	7.9	632	632	By matching	By MS/MS	350	53;2002;2191;2434;2835	True;True;True;True;True	55;2163;2365;2623;3062	321;19757;19758;19759;19760;19761;19762;21251;21252;21253;22918;22919;22920;22921;22922;22923;22924;26428;26429;26430;26431;26432;26433;26434	195;21533;22829;24128;27960;27961	195;21533;22829;24128;27961						-1
Q9H9F9	Actin-related protein 5	ACTR5	sp|Q9H9F9|ARP5_HUMAN Actin-related protein 5 OS=Homo sapiens (Human) OX=9606 GN=ACTR5 PE=1 SV=2	1	3	3	3	5.6	4.3	5.6	68.297	0	1.6892	1387500	5423000	26	53365	208580	958850	2560100	0	3	6	Q9H9F9	2	3	2	3	2	3	5.6	5.6	607	607	By matching	By MS/MS	361	26;1271;3130	True;True;True	27;1360;3378	163;164;165;166;167;11619;11620;11621;11622;11623;11624;11625;28662;28663;28664;28665;28666;28667;28668;28669	113;12539;12540;12541;30037;30038	113;12539;30038						-1
P01687	Ig kappa chain V region BS-5		sp|P01687|KV06_RABIT Ig kappa chain V region BS-5 OS=Oryctolagus cuniculus PE=1 SV=1	1	1	1	1	10.2	10.2	10.2	11.037	0	1.517	5183800	6209800	2	2591900	3104900	7407000	6802600	1	1	5	CON__sp|P01687|KV06_RABIT	1	1	1	1	1	1	10.2	10.2	108	108	By MS/MS	By MS/MS	11	266	TRUE	280	2109;2110;2111;2112;2113;2114;2115;2116;2117	2020;2021;2022;2023;2024	2024					+	-1
Q9BYR9	Keratin-associated protein 2-2;Keratin-associated protein 2-1;Keratin-associated protein 2-4;Keratin-associated protein 2-3	KRTAP2-2;KRTAP2-1;KRTAP2-4;KRTAP2-3	sp|Q9BYR9|KRA24_HUMAN Keratin-associated protein 2-4 OS=Homo sapiens GN=KRTAP2-4 PE=2 SV=1	7	3	3	3	20.3	20.3	0	13.48	0	19.703	55081000	0	8	6885100	0	0	0	5	0	5	CON__sp|Q9BYR9|KRA24_HUMAN;CON__sp|P02443|KRA3A_SHEEP;CON__sp|P02441|KRA3_SHEEP;Q9BYT5;Q9BYU5;Q9BYR9;P0C7H8	3	0	3	0	3	0	20.3	20.3	128	128;130;131;123;128;128;128	By MS/MS		18	346;2088;2287	True;True;True	364;2260;2467	2661;2662;20454;21871	2393;2394;2395;22057;23361	2393;22057;23361					+	-1;-1;-1;-1;-1;-1;-1
P08727	Keratin, type I cytoskeletal 19	KRT19	sp|P08727|K1C19_HUMAN Keratin, type I cytoskeletal 19 OS=Homo sapiens GN=KRT19 PE=1 SV=4	4	9	5	4	21.8	4.5	19.5	44.105	0	3.4853	1375000	18746000	31	44356	604710	348910	11726000	0	5	5	P08727;CON__sp|P08727|K1C19_HUMAN;CON__sp|P19001|K1C19_MOUSE;CON__sp|P05784|K1C18_MOUSE	3	7	1	5	0	4	15.5	13.2	400	400;400;403;423	By MS/MS	By MS/MS	27	18;505;1342;1486;1527;1529;1969;2200;2919	True;True;True;False;False;False;True;True;False	19;539;1436;1588;1632;1634;2125;2375;3151	135;4055;13030;13031;13032;13033;13034;13035;13036;13037;14741;14742;14743;15071;15072;15073;15074;15075;15076;15077;15078;15079;15088;15089;15090;15091;15092;19509;19510;21297;27055;27056;27057;27058;27059	96;3803;14620;16704;16705;16706;16707;17027;17028;17029;17030;17031;17032;17036;17037;17038;17039;17040;17041;21311;22863;28439;28440	96;3803;14620;16705;17029;17040;21311;22863;28439					+	-1;-1;-1;-1
O95671	N-acetylserotonin O-methyltransferase-like protein	ASMTL	sp|O95671|ASML_HUMAN Probable bifunctional dTTP/UTP pyrophosphatase/methyltransferase protein OS=Homo sapiens (Human) OX=9606 GN=ASMTL PE=1 SV=3	1	3	3	3	5.6	1.9	5.6	68.856	0.0028818	0.53201	1850100	6352900	28	66074	226890	2613400	2996700	0	1	5	O95671	1	3	1	3	1	3	5.6	5.6	621	621	By matching	By MS/MS	77	1815;2864;3026	True;True;True	1938;3092;3269	17488;17489;17490;17491;17492;17493;17494;26637;26638;26639;26640;26641;26642;26643;26644;27911;27912;27913	19107;19108;28112;28113;28114;29274	19108;28112;29274						-1
P28288	ATP-binding cassette sub-family D member 3	ABCD3	sp|P28288|ABCD3_HUMAN ATP-binding cassette sub-family D member 3 OS=Homo sapiens (Human) OX=9606 GN=ABCD3 PE=1 SV=1	1	4	4	4	7.1	5.3	7.1	75.475	0.0032051	1.185	2744700	6509300	40	68618	162730	2935900	5431800	2	3	5	P28288	3	4	3	4	3	4	7.1	7.1	659	659	By MS/MS	By MS/MS	140	431;809;2409;2572	True;True;True;True	456;865;2598;2777	3268;3269;3270;3271;6347;22777;22778;22779;22780;22781;24142;24143;24144;24145;24146;24147;24148	2876;5993;23991;23992;25521;25522	2876;5993;23991;25521						-1
P42357	Histidine ammonia-lyase	HAL	sp|P42357|HUTH_HUMAN Histidine ammonia-lyase OS=Homo sapiens (Human) OX=9606 GN=HAL PE=1 SV=1	1	4	4	4	8.4	0	0	72.697	0	5.6246	0	0	34	0	0	0	0	0	0	5	P42357	0	0	0	0	0	0	8.4	8.4	657	657			158	1748;2476;2804;3156	True;True;True;True	1868;2672;3028;3405	16944;23452;23453;26060;28825	18578;25042;25043;27410;30187	18578;25042;27410;30187						-1
P46977	Dolichyl-diphosphooligosaccharide--protein glycosyltransferase subunit STT3A	STT3A	sp|P46977|STT3A_HUMAN Dolichyl-diphosphooligosaccharide--protein glycosyltransferase subunit STT3A OS=Homo sapiens (Human) OX=9606 GN=STT3A PE=1 SV=2	1	1	1	1	1.6	1.6	1.6	80.529	0	1.4229	684550	1353600	29	23605	46677	766260	1425000	0	1	5	P46977	1	1	1	1	1	1	1.6	1.6	705	705	By MS/MS	By MS/MS	162	833	TRUE	890	6535;6536;6537;6538;6539;6540;6541;6542;6543	6567;6568;6569;6570;6571	6567						-1
P62081	40S ribosomal protein S7	RPS7	sp|P62081|RS7_HUMAN 40S ribosomal protein S7 OS=Homo sapiens (Human) OX=9606 GN=RPS7 PE=1 SV=1	1	2	2	2	26.8	11.3	15.5	22.127	0	1.3192	366270	389300	10	36627	38930	681420	413360	1	1	5	P62081	1	1	1	1	1	1	26.8	26.8	194	194	By MS/MS	By MS/MS	179	1340;2717	True;True	1433;1434;2931	13021;13022;13023;13024;13025;13026;13027;25221;25222;25223	14615;14616;14617;14618;26479	14617;26479	200		32			-1
Q08554	Desmocollin-1	DSC1	sp|Q08554|DSC1_HUMAN Desmocollin-1 OS=Homo sapiens (Human) OX=9606 GN=DSC1 PE=1 SV=2	1	4	4	4	5.4	1.7	1.7	99.986	0	3.3787	1253500	1120200	48	26115	23337	559220	434610	0	0	5	Q08554	1	1	1	1	1	1	5.4	5.4	894	894	By matching	By matching	203	470;1158;1256;2997	True;True;True;True	498;1231;1340;3237	3751;3752;8984;11453;27740;27741;27742;27743;27744;27745;27746;27747	3471;8690;12255;29109;29110	3471;8690;12255;29110						-1
Q15046	Lysine--tRNA ligase	KARS	sp|Q15046|SYK_HUMAN Lysine--tRNA ligase OS=Homo sapiens (Human) OX=9606 GN=KARS1 PE=1 SV=3	1	2	2	2	5	0	5	68.047	0	1.9661	0	2247700	30	0	74924	0	2136800	0	1	5	Q15046	0	2	0	2	0	2	5	5	597	597		By MS/MS	229	1724;3144	True;True	1843;3393	16784;16785;16786;16787;28751;28752;28753;28754;28755;28756;28757	18453;18454;30131;30132;30133;30134	18453;30133						-1
Q15650	Activating signal cointegrator 1	TRIP4	sp|Q15650|TRIP4_HUMAN Activating signal cointegrator 1 OS=Homo sapiens (Human) OX=9606 GN=TRIP4 PE=1 SV=4	1	4	4	4	8.3	4.3	5.7	66.145	0	5.5718	2969100	5597900	28	106040	199930	1863600	2413500	0	1	5	Q15650	2	3	2	3	2	3	8.3	8.3	581	581	By MS/MS	By MS/MS	234	829;1445;1534;2044	True;True;True;True	886;1546;1639;2213	6505;6506;6507;6508;6509;6510;14471;14472;15123;15124;15125;15126;15127;15128;20114;20115;20116;20117;20118;20119;20120	6552;16507;17051;21823;21824	6552;16507;17051;21823						-1
Q1MSJ5	Centrosome and spindle pole-associated protein 1	CSPP1	sp|Q1MSJ5|CSPP1_HUMAN Centrosome and spindle pole-associated protein 1 OS=Homo sapiens (Human) OX=9606 GN=CSPP1 PE=1 SV=4	1	2	2	2	1.7	1	1.7	145.52	0	7.7564	1493100	3335400	60	24885	55590	1886500	1925500	1	1	5	Q1MSJ5	1	2	1	2	1	2	1.7	1.7	1256	1256	By MS/MS	By MS/MS	244	2266;2749	True;True	2445;2965	21760;21761;21762;21763;21764;25406;25407;25408;25409;25410;25411;25412	23279;23280;23281;26632;26633	23279;26633						-1
Q6L8Q7	2,5-phosphodiesterase 12	PDE12	sp|Q6L8Q7|PDE12_HUMAN 2,5-phosphodiesterase 12 OS=Homo sapiens (Human) OX=9606 GN=PDE12 PE=1 SV=2	1	3	3	3	6.2	3.9	3.9	67.351	0.0031546	1.0917	1378000	1710300	25	55119	68413	915430	868850	0	0	5	Q6L8Q7	2	2	2	2	2	2	6.2	6.2	609	609	By matching	By matching	264	1795;2029;3043	True;True;True	1916;2196;3288	17340;17341;17342;19991;19992;19993;19994;19995;28095;28096;28097;28098;28099;28100;28101;28102	18945;18946;21718;29587;29588	18945;21718;29588						-1
Q6ZN06	Zinc finger protein 813	ZNF813	sp|Q6ZN06|ZN813_HUMAN Zinc finger protein 813 OS=Homo sapiens (Human) OX=9606 GN=ZNF813 PE=2 SV=2	1	1	1	1	2.4	2.4	2.4	71.72	0.003125	0.99306	4250600	4598200	28	151810	164220	3515800	2648300	1	1	5	Q6ZN06	1	1	1	1	1	1	2.4	2.4	617	617	By MS/MS	By MS/MS	270	1617	TRUE	1726	15698;15699;15700;15701;15702;15703;15704;15705;15706	17421;17422;17423;17424;17425	17423						-1
Q8N137	Centrobin	CNTROB	sp|Q8N137|CNTRB_HUMAN Centrobin OS=Homo sapiens (Human) OX=9606 GN=CNTROB PE=1 SV=1	1	1	1	1	1.1	1.1	1.1	101.25	0	1.456	1467000	1849800	48	30563	38537	1913600	1849800	1	1	5	Q8N137	1	1	1	1	1	1	1.1	1.1	903	903	By MS/MS	By MS/MS	290	1515	TRUE	1620	14979;14980;14981;14982;14983	16939;16940;16941;16942;16943	16940						-1
Q99832	T-complex protein 1 subunit eta	CCT7	sp|Q99832|TCPH_HUMAN T-complex protein 1 subunit eta OS=Homo sapiens (Human) OX=9606 GN=CCT7 PE=1 SV=2	1	1	1	1	3.9	0	3.9	59.366	0	4.5463	0	0	31	0	0	0	0	0	1	5	Q99832	0	1	0	1	0	1	3.9	3.9	543	543		By MS/MS	334	2897	TRUE	3126	26857;26858;26859;26860;26861;26862;26863	28293;28294;28295;28296;28297	28293						-1
Q9BVL4	Selenoprotein O	SELO	sp|Q9BVL4|SELO_HUMAN Protein adenylyltransferase SelO, mitochondrial OS=Homo sapiens (Human) OX=9606 GN=SELENOO PE=1 SV=3	1	3	3	3	4.9	0	1.2	73.488	0	3.8709	0	399760	30	0	13325	0	535120	0	0	5	Q9BVL4	0	1	0	1	0	1	4.9	4.9	669	669		By matching	340	767;1579;2081	True;True;True	821;1686;2253	6051;6052;6053;6054;6055;6056;15466;15467;15468;20397;20398;20399;20400;20401	5741;5742;17274;17275;22015;22016	5741;17275;22015						-1
Q9H3P7	Golgi resident protein GCP60	ACBD3	sp|Q9H3P7|GCP60_HUMAN Golgi resident protein GCP60 OS=Homo sapiens (Human) OX=9606 GN=ACBD3 PE=1 SV=4	1	4	4	4	8.7	1.5	3	60.593	0	22.003	486510	517340	21	23167	24635	446530	362840	0	0	5	Q9H3P7	1	1	1	1	1	1	8.7	8.7	528	528	By matching	By matching	354	35;83;1288;2182	True;True;True;True	36;89;1378;2356	206;207;208;209;210;580;581;12107;21198;21199;21200;21201	132;133;622;13342;22809	132;622;13342;22809						-1
Q9H4Q4	PR domain zinc finger protein 12	PRDM12	sp|Q9H4Q4|PRD12_HUMAN PR domain zinc finger protein 12 OS=Homo sapiens (Human) OX=9606 GN=PRDM12 PE=1 SV=2	1	1	1	1	2.5	2.5	2.5	40.403	0	2	10677000	10478000	15	711800	698520	13927000	10478000	0	1	5	Q9H4Q4	1	1	1	1	1	1	2.5	2.5	367	367	By MS/MS	By MS/MS	358	1619	TRUE	1728	15725;15726;15727;15728;15729;15730	17449;17450;17451;17452;17453	17452						-1
Q9NQV5	PR domain-containing protein 11	PRDM11	sp|Q9NQV5|PRD11_HUMAN PR domain-containing protein 11 OS=Homo sapiens (Human) OX=9606 GN=PRDM11 PE=1 SV=2	1	2	2	2	5.5	5.5	5.5	57.862	0	1.7217	5033600	7195800	26	193600	276760	6089600	4844700	1	1	5	Q9NQV5	2	2	2	2	2	2	5.5	5.5	511	511	By MS/MS	By MS/MS	365	915;2278	True;True	975;2457	7256;7257;7258;7259;7260;7261;21832;21833;21834;21835;21836	7292;7293;23341;23342;23343	7293;23341						-1
Q9NXV6	CDKN2A-interacting protein	CDKN2AIP	sp|Q9NXV6|CARF_HUMAN CDKN2A-interacting protein OS=Homo sapiens (Human) OX=9606 GN=CDKN2AIP PE=1 SV=3	1	4	4	4	8.6	4	8.6	61.124	0	9.9728	1974200	6447200	34	58064	189620	1413100	1976400	0	2	5	Q9NXV6	2	4	2	4	2	4	8.6	8.6	580	580	By matching	By MS/MS	373	226;930;2769;2998	True;True;True;True	240;990;2986;3238	1803;1804;1805;1806;1807;1808;7346;7347;7348;7349;7350;25499;25500;25501;27748;27749;27750;27751;27752;27753;27754	1764;1765;7347;26701;29111	1764;7347;26701;29111						-1
Q9NZM1	Myoferlin	MYOF	sp|Q9NZM1|MYOF_HUMAN Myoferlin OS=Homo sapiens (Human) OX=9606 GN=MYOF PE=1 SV=1	1	4	4	4	2	0.9	0.3	234.71	0	3.4392	840880	717300	124	6781.3	5784.7	561650	553750	0	0	5	Q9NZM1	2	1	2	1	2	1	2	2	2061	2061	By MS/MS	By MS/MS	375	1121;1252;1319;2869	True;True;True;True	1193;1335;1409;3097	8635;8636;8637;8638;8639;8640;8641;8642;8643;11431;11432;12303;12304;12305;12306;26657	8252;12240;12241;13492;28119	8252;12240;13492;28119						-1
Q9BYQ5	Keratin-associated protein 4-6;Keratin-associated protein 4-7;Keratin-associated protein 4-5;Keratin-associated protein 4-12	KRTAP4-6;KRTAP4-7;KRTAP4-5;KRTAP4-12	sp|Q9BYQ5|KRA46_HUMAN Keratin-associated protein 4-6 OS=Homo sapiens GN=KRTAP4-6 PE=2 SV=4	11	3	3	1	23.9	23.9	0	21.825	0	12.174	23263000	0	15	1550800	0	0	0	4	0	4	CON__sp|Q9BYQ5|KRA46_HUMAN;A0A140TA64;Q9BYQ5;Q9BYR0;Q9BYR2;Q9BQ66;A0A0G2JLE6;CON__sp|Q9BYQ8|KRA49_HUMAN;G5E9R7;Q9BYR5;Q9BYQ8	3	0	3	0	1	0	23.9	9.3	205	205;210;205;210;181;201;195;210;235;136;210	By MS/MS		1	2097;2098;2985	True;True;True	2269;2270;3225	20576;20577;27664;27665	22212;22213;29052;29053	22212;22213;29052					+	-1;-1;-1;-1;-1;-1;-1;-1;-1;-1;-1
B9A064;P0DOY3;P0DOY2;P0CG04;P0CF74;A0M8Q6	Immunoglobulin lambda-like polypeptide 5;Ig lambda-1 chain C regions;Ig lambda-6 chain C region;Ig lambda-7 chain C region	IGLL5;IGLC1;IGLC6;IGLC7	sp|B9A064|IGLL5_HUMAN Immunoglobulin lambda-like polypeptide 5 OS=Homo sapiens (Human) OX=9606 GN=IGLL5 PE=2 SV=2;sp|P0DOY3|IGLC3_HUMAN Immunoglobulin lambda constant 3 OS=Homo sapiens (Human) OX=9606 GN=IGLC3 PE=1 SV=1;sp|P0DOY2|IGLC2_HUMAN Immunoglobulin	6	1	1	1	7	7	7	23.063	0	60.696	1755800	2086700	13	135060	160510	2235800	2165800	0	1	4	B9A064;P0DOY3;P0DOY2;P0CG04;P0CF74;A0M8Q6	1	1	1	1	1	1	7	7	214	214;106;106;106;106;106	By matching	By MS/MS	3	3066	TRUE	3311	28214;28215;28216;28217;28218;28219;28220;28221;28222	29648;29649;29650;29651	29648						-1;-1;-1;-1;-1;-1
P48668	Keratin, type II cytoskeletal 6A;Keratin, type II cytoskeletal 6C	KRT6A;KRT6C	sp|P48668|K2C6C_HUMAN Keratin, type II cytoskeletal 6C OS=Homo sapiens GN=KRT6C PE=1 SV=3	5	17	3	1	24.6	13.5	12.2	60.044	0	9.8689	547530	446700	30	18251	14890	646590	1314300	0	0	4	P02538;P48668;CON__sp|P48668|K2C6C_HUMAN;CON__sp|P02538|K2C6A_HUMAN;CON__sp|Q8VED5|K2C79_MOUSE	10	8	1	1	0	0	8.2	3	564	564;564;564;564;531	By matching	By matching	20	50;125;244;727;737;738;1009;1427;1992;1993;1998;2159;2173;2174;2295;3064;3076	True;True;False;False;False;False;True;False;False;False;False;False;False;False;False;False;False	52;132;258;779;789;790;1074;1525;2151;2152;2159;2333;2347;2348;2475;3309;3322	305;306;307;308;309;310;939;1923;1924;1925;1926;1927;1928;1929;1930;1931;5780;5868;5869;5870;5871;5872;5873;5874;5875;5876;5877;5878;5879;5880;7871;7872;7873;7874;14267;14268;14269;14270;14271;14272;14273;14274;14275;14276;14277;14278;19687;19688;19689;19690;19691;19692;19693;19694;19695;19696;19697;19698;19699;19700;19701;19702;19703;19704;19705;19706;19707;19708;19709;19710;19711;19730;19731;19…	183;184;954;1874;1875;1876;1877;1878;1879;1880;1881;1882;1883;1884;1885;1886;1887;1888;1889;5519;5589;5590;5591;5592;5593;5594;5595;5596;5597;5598;5599;5600;5601;5602;5603;5604;5605;5606;7705;16180;16181;16182;16183;16184;16185;16186;21459;21460;21461;21462;21463;21464;21465;21466;21467;21468;21469;21470;21471;21472;21473;21474;21475;21476;21477;21478;21479;21480;21481;21482;21483;21484;21485;214…	183;954;1884;5519;5592;5604;7705;16185;21459;21489;21523;22759;22781;22782;23388;29644;29693					+	-1;-1;-1;-1;-1
P06709	Bifunctional ligase/repressor BirA	birA	sp|P06709|BIRA_ECOLI Bifunctional ligase/repressor BirA OS=Escherichia coli (strain K12) GN=birA PE=1 SV=1	1	1	1	1	3.7	0	3.7	35.312	0.0081967	0.28395	0	326320	18	0	18129	0	352590	0	0	4	CON__sp|P06709|BIRA_ECOLI	0	1	0	1	0	1	3.7	3.7	321	321		By matching	25	498	TRUE	530	3991;3992;3993;3994;3995;3996;3997	3747;3748;3749;3750	3750					+	-1
P18529	Ig heavy chain V region 5-76		sp|P18529|HVM58_MOUSE Ig heavy chain V region 5-76 OS=Mus musculus PE=1 SV=1	1	1	1	1	6	6	6	12.991	0.0082645	0.30375	8981600	3774800	7	1283100	539260	5810000	4811500	0	1	4	CON__sp|P18529|HVM58_MOUSE	1	1	1	1	1	1	6	6	117	117	By MS/MS	By MS/MS	31	3070	TRUE	3315;3316	28251;28252;28253;28254;28255;28256;28257;28258;28259	29669;29670;29671;29672	29670					+	-1
O43309	Zinc finger and SCAN domain-containing protein 12	ZSCAN12	sp|O43309|ZSC12_HUMAN Zinc finger and SCAN domain-containing protein 12 OS=Homo sapiens (Human) OX=9606 GN=ZSCAN12 PE=1 SV=1	1	2	1	1	4.1	4.1	4.1	70.222	0	1.979	2059300	2089100	27	76269	77372	2686000	2089100	1	1	4	O43309	2	2	1	1	1	1	2.5	2.5	604	604	By MS/MS	By MS/MS	62	1204;1219	True;False	1279;1296	9699;9700;9701;9702;9703;10010;10011;10012;10013;10014;10015;10016;10017;10018	9921;9922;9923;9924;10369;10370;10371;10372;10373;10374;10375;10376	9921;10373						-1
O96013	Serine/threonine-protein kinase PAK 4	PAK4	sp|O96013|PAK4_HUMAN Serine/threonine-protein kinase PAK 4 OS=Homo sapiens (Human) OX=9606 GN=PAK4 PE=1 SV=1	1	3	2	2	6.4	4.6	4.6	64.071	0.0030395	0.88124	1100500	1454900	24	45854	60622	1021000	1034200	0	0	4	O96013	2	2	2	2	2	2	4.6	4.6	591	591	By matching	By matching	79	20;630;736	True;False;True	21;670;788	139;140;141;142;143;144;145;5118;5119;5120;5863;5864;5865;5866;5867	98;99;100;4957;5588	98;4957;5588	67		370			-1
P00558	Phosphoglycerate kinase 1	PGK1	sp|P00558|PGK1_HUMAN Phosphoglycerate kinase 1 OS=Homo sapiens (Human) OX=9606 GN=PGK1 PE=1 SV=3	1	2	2	2	8.4	8.4	8.4	44.614	0.0031949	1.1618	902070	1759400	27	33410	65164	691820	942470	0	0	4	P00558	2	2	2	2	2	2	8.4	8.4	417	417	By matching	By matching	80	155;1334	True;True	162;1427	1166;1167;1168;1169;1170;1171;1172;1173;1174;12978;12979;12980;12981;12982;12983;12984	1146;1147;14584;14585	1147;14584						-1
P04040	Catalase	CAT	sp|P04040|CATA_HUMAN Catalase OS=Homo sapiens (Human) OX=9606 GN=CAT PE=1 SV=3	1	4	4	4	11.4	0	0	59.755	0	86.331	0	0	29	0	0	0	0	0	0	4	P04040	0	0	0	0	0	0	11.4	11.4	527	527			87	52;95;791;1800	True;True;True;True	54;102;847;1921	320;735;736;737;6234;17364	194;800;5918;18957	194;800;5918;18957						-1
P23588	Eukaryotic translation initiation factor 4B	EIF4B	sp|P23588|IF4B_HUMAN Eukaryotic translation initiation factor 4B OS=Homo sapiens (Human) OX=9606 GN=EIF4B PE=1 SV=2	1	3	3	3	6.4	6.4	4.3	69.15	0	2.416	2001400	1342400	27	74126	49717	1075400	801610	0	0	4	P23588	3	2	3	2	3	2	6.4	6.4	611	611	By matching	By matching	136	29;375;2822	True;True;True	30;393;3047	180;181;182;183;184;2873;2874;2875;2876;2877;2878;2879;2880;26161;26162;26163;26164	116;2583;27470;27471	116;2583;27471						-1
P29350	Tyrosine-protein phosphatase non-receptor type 6	PTPN6	sp|P29350|PTN6_HUMAN Tyrosine-protein phosphatase non-receptor type 6 OS=Homo sapiens (Human) OX=9606 GN=PTPN6 PE=1 SV=1	1	4	4	4	7.9	0	0	67.56	0	3.4632	0	0	35	0	0	0	0	0	0	4	P29350	0	0	0	0	0	0	7.9	7.9	595	595			142	102;432;2711;2867	True;True;True;True	109;457;2925;3095	775;3272;3273;3274;25175;26651;26652	825;2877;26446;28117	825;2877;26446;28117						-1
P50990	T-complex protein 1 subunit theta	CCT8	sp|P50990|TCPQ_HUMAN T-complex protein 1 subunit theta OS=Homo sapiens (Human) OX=9606 GN=CCT8 PE=1 SV=4	1	1	1	1	2.6	0	0	59.62	0	1.7271	0	0	37	0	0	0	0	0	0	4	P50990	0	0	0	0	0	0	2.6	2.6	548	548			167	439	TRUE	467	3350;3351;3352;3353;3354	2949;2950;2951;2952	2949	179		492			-1
P51116	Fragile X mental retardation syndrome-related protein 2	FXR2	sp|P51116|FXR2_HUMAN Fragile X mental retardation syndrome-related protein 2 OS=Homo sapiens (Human) OX=9606 GN=FXR2 PE=1 SV=2	1	4	2	1	7.7	7.7	7.7	74.222	0	4.1717	1953700	2715200	35	55821	77576	1234600	1420900	0	1	4	P51116	4	4	2	2	1	1	5.3	2.5	673	673	By matching	By MS/MS	169	111;542;1756;2905	True;True;False;False	118;578;1876;3137	827;828;829;830;4341;4342;4343;4344;4345;16988;16989;16990;16991;16992;16993;16994;16995;16996;26936;26937;26938;26939;26940;26941;26942;26943;26944	855;4104;4105;4106;18592;18593;18594;18595;18596;18597;18598;18599;18600;18601;18602;18603;18604;28340;28341;28342;28343;28344;28345;28346;28347;28348	855;4105;18593;28341	184		240			-1
P52740	Zinc finger protein 132	ZNF132	sp|P52740|ZN132_HUMAN Zinc finger protein 132 OS=Homo sapiens (Human) OX=9606 GN=ZNF132 PE=2 SV=2	1	1	1	1	2.1	2.1	2.1	80.622	0.003096	0.93267	1655100	1612100	39	42437	41336	2121900	1584600	1	1	4	P52740	1	1	1	1	1	1	2.1	2.1	706	706	By MS/MS	By MS/MS	172	1197	TRUE	1272	9641;9642;9643;9644;9645	9858;9859;9860;9861	9859						-1
P81605	Dermcidin;Survival-promoting peptide;DCD-1	DCD	sp|P81605|DCD_HUMAN Dermcidin OS=Homo sapiens (Human) OX=9606 GN=DCD PE=1 SV=2	1	2	2	2	12.7	10	0	11.284	0.0031646	1.1138	1660700	0	5	332130	0	1984700	0	1	0	4	P81605	1	0	1	0	1	0	12.7	12.7	110	110	By MS/MS		185	364;1601	True;True	382;1709	2816;2817;2818;2819;2820;15601;15602;15603;15604	2549;2550;2551;17367	2551;17367						-1
Q05519	Serine/arginine-rich splicing factor 11	SRSF11	sp|Q05519|SRS11_HUMAN Serine/arginine-rich splicing factor 11 OS=Homo sapiens (Human) OX=9606 GN=SRSF11 PE=1 SV=1	1	3	3	3	8.1	0	0	53.542	0	4.2656	0	0	12	0	0	0	0	0	0	4	Q05519	0	0	0	0	0	0	8.1	8.1	484	484			195	159;590;1717	True;True;True	166;629;1836	1179;1180;4870;16735;16736;16737	1153;1154;4752;18392	1153;4752;18392						-1
Q15291	Retinoblastoma-binding protein 5	RBBP5	sp|Q15291|RBBP5_HUMAN Retinoblastoma-binding protein 5 OS=Homo sapiens (Human) OX=9606 GN=RBBP5 PE=1 SV=2	1	2	2	2	4.3	0	2.2	59.152	0	5.3078	0	858240	26	0	33009	0	669300	0	0	4	Q15291	0	1	0	1	0	1	4.3	4.3	538	538		By matching	231	2636;3010	True;True	2843;3251	24620;24621;27845;27846;27847;27848;27849;27850;27851	25920;25921;29246;29247	25920;29246						-1
Q8WYA6	Beta-catenin-like protein 1	CTNNBL1	sp|Q8WYA6|CTBL1_HUMAN Beta-catenin-like protein 1 OS=Homo sapiens (Human) OX=9606 GN=CTNNBL1 PE=1 SV=1	1	3	3	3	5.7	0	0	65.173	0	1.6093	0	0	26	0	0	0	0	0	0	4	Q8WYA6	0	0	0	0	0	0	5.7	5.7	563	563			310	819;827;1880	True;True;True	875;884;2008	6420;6421;6422;6423;6491;6492;6493;6494;6495;17974;17975;17976	6451;6538;6539;19559	6451;6538;19559	277		1			-1
Q92841	Probable ATP-dependent RNA helicase DDX17	DDX17	sp|Q92841|DDX17_HUMAN Probable ATP-dependent RNA helicase DDX17 OS=Homo sapiens (Human) OX=9606 GN=DDX17 PE=1 SV=2	1	11	1	1	13.9	13.9	12.1	80.272	0	11.555	624160	0	37	16869	0	752600	0	0	0	4	Q92841	10	10	1	0	1	0	1.8	1.8	729	729	By matching	By matching	314	210;855;937;1023;1030;1338;1415;1651;1909;2210;2570	False;False;False;True;False;False;False;False;False;False;False	223;913;997;1091;1098;1431;1512;1762;2045;2046;2047;2385;2386;2775	1676;1677;1678;1679;1680;1681;1682;1683;1684;1685;1686;1687;1688;1689;1690;6684;6685;6686;6687;6688;6689;6690;6691;6692;7400;7401;7402;7403;7404;7405;7406;7407;7408;7996;7997;7998;7999;8000;8001;8002;8039;8040;8041;8042;8043;8044;8045;8046;8047;13004;13005;13006;13007;13008;13009;13010;13011;14162;14163;14164;14165;14166;14167;14168;14169;14170;14171;14172;14173;14174;14175;14176;14177;14178;1417…	1629;1630;1631;1632;1633;1634;1635;1636;1637;1638;1639;1640;1641;1642;1643;1644;1645;1646;1647;1648;1649;1650;1651;1652;1653;1654;1655;6683;6684;6685;6686;6687;6688;6689;6690;6691;6692;6693;6694;6695;6696;6697;6698;6699;6700;6701;6702;7369;7370;7371;7372;7373;7374;7375;7797;7798;7799;7800;7816;7817;7818;7819;7820;7821;7822;7823;7824;7825;7826;7827;7828;7829;7830;7831;7832;14609;14610;16124;16125;…	1654;6684;7369;7799;7818;14609;16130;17730;20007;22944;25507	56;57;124		330;333;354			-1
Q969J2	Zinc finger protein with KRAB and SCAN domains 4	ZKSCAN4	sp|Q969J2|ZKSC4_HUMAN Zinc finger protein with KRAB and SCAN domains 4 OS=Homo sapiens (Human) OX=9606 GN=ZKSCAN4 PE=1 SV=1	1	1	1	1	2.8	0	2.8	61.579	0.0029155	0.59794	0	33207000	30	0	1106900	0	33207000	0	1	4	Q969J2	0	1	0	1	0	1	2.8	2.8	545	545		By MS/MS	315	1200	TRUE	1275	9682;9683;9684;9685	9904;9905;9906;9907	9907						-1
A0A075B6I1	Immunoglobulin lambda variable 4-60	IGLV4-60	sp|A0A075B6I1|LV460_HUMAN Immunoglobulin lambda variable 4-60 OS=Homo sapiens (Human) OX=9606 GN=IGLV4-60 PE=3 SV=1	1	1	1	1	8.3	0	0	12.987	0.0031348	1.0442	0	0	5	0	0	0	0	0	0	3	A0A075B6I1	0	0	0	0	0	0	8.3	8.3	120	120			0	807	TRUE	863	6335;6336;6337	5975;5976;5977	5976						-1
A0FGR8	Extended synaptotagmin-2	ESYT2	sp|A0FGR8|ESYT2_HUMAN Extended synaptotagmin-2 OS=Homo sapiens (Human) OX=9606 GN=ESYT2 PE=1 SV=1	1	1	1	1	1.4	1.4	1.4	102.36	0	3.3308	677490	1518100	46	14728	33002	815360	919230	0	2	3	A0FGR8	1	1	1	1	1	1	1.4	1.4	921	921	By matching	By MS/MS	2	688	TRUE	738	5580;5581;5582;5583;5584	5379;5380;5381	5379						-1
Q9C075	Keratin, type I cytoskeletal 23	KRT23	sp|Q9C075|K1C23_HUMAN Keratin, type I cytoskeletal 23 OS=Homo sapiens GN=KRT23 PE=1 SV=2	2	4	3	3	8.8	0	0	48.131	0	2.448	0	0	27	0	0	0	0	0	0	3	Q9C075;CON__sp|Q9C075|K1C23_HUMAN	0	0	0	0	0	0	6.6	6.6	422	422;422			46	281;422;1307;3082	False;True;True;True	296;447;1397;3328	2218;2219;3234;12238;12239;28341	2113;2856;13441;29756	2113;2856;13441;29756					+	-1;-1
P04196	Histidine-rich glycoprotein	HRG	sp|P04196|HRG_HUMAN Histidine-rich glycoprotein OS=Homo sapiens (Human) OX=9606 GN=HRG PE=1 SV=1	1	2	2	2	1.9	0	1.9	59.578	0.0028902	0.53876	0	1931600	21	0	91979	0	1432300	0	0	3	P04196	0	2	0	2	0	2	1.9	1.9	525	525		By MS/MS	89	400;2242	True;True	421;2419	3019;3020;3021;3022;3023;3024;3025;3026;21613;21614;21615;21616;21617;21618	2690;2691;23168	2691;23168						-1
P08174	Complement decay-accelerating factor	CD55	sp|P08174|DAF_HUMAN Complement decay-accelerating factor OS=Homo sapiens (Human) OX=9606 GN=CD55 PE=1 SV=4	1	3	3	3	8.7	5.5	8.7	41.4	0.0082418	0.30094	4251200	14308000	23	184830	622080	1869200	8075400	0	3	3	P08174	2	3	2	3	2	3	8.7	8.7	381	381	By MS/MS	By MS/MS	101	1276;2206;2759	True;True;True	1365;2381;2975	11651;11652;11653;11654;11655;21349;21350;21351;21352;25449	12547;22930;26651	12547;22930;26651						-1
P14618	Pyruvate kinase PKM	PKM	sp|P14618|KPYM_HUMAN Pyruvate kinase PKM OS=Homo sapiens (Human) OX=9606 GN=PKM PE=1 SV=4	1	1	1	1	4.3	4.3	4.3	57.936	0	11.995	796260	1239000	33	24129	37545	1053900	1203000	0	0	3	P14618	1	1	1	1	1	1	4.3	4.3	531	531	By matching	By matching	120	2622	TRUE	2829	24544;24545;24546;24547;24548;24549;24550;24551;24552	25872;25873;25874	25873						-1
P22735	Protein-glutamine gamma-glutamyltransferase K	TGM1	sp|P22735|TGM1_HUMAN Protein-glutamine gamma-glutamyltransferase K OS=Homo sapiens (Human) OX=9606 GN=TGM1 PE=1 SV=4	1	3	3	3	4.8	0	0	89.786	0	9.3352	0	0	47	0	0	0	0	0	0	3	P22735	0	0	0	0	0	0	4.8	4.8	817	817			134	2027;2754;2896	True;True;True	2194;2970;3125	19989;25434;26856	21716;26643;28292	21716;26643;28292						-1
P36578	60S ribosomal protein L4	RPL4	sp|P36578|RL4_HUMAN 60S ribosomal protein L4 OS=Homo sapiens (Human) OX=9606 GN=RPL4 PE=1 SV=5	1	1	1	1	2.8	2.8	2.8	47.697	0.005698	0.46375	428950	913530	16	26810	57096	588780	850440	0	0	3	P36578	1	1	1	1	1	1	2.8	2.8	427	427	By matching	By matching	153	1980	TRUE	2138	19589;19590;19591;19592;19593;19594;19595;19596;19597	21403;21404;21405	21405						-1
Q07020	60S ribosomal protein L18	RPL18	sp|Q07020|RL18_HUMAN 60S ribosomal protein L18 OS=Homo sapiens (Human) OX=9606 GN=RPL18 PE=1 SV=2	1	1	1	1	6.9	0	0	21.634	0	1.7163	0	0	7	0	0	0	0	0	0	3	Q07020	0	0	0	0	0	0	6.9	6.9	188	188			200	1259	TRUE	1343	11456;11457;11458;11459;11460	12258;12259;12260	12258						-1
Q5SRN2	Uncharacterized protein C6orf10	C6orf10	sp|Q5SRN2|TSBP1_HUMAN Testis-expressed basic protein 1 OS=Homo sapiens (Human) OX=9606 GN=TSBP1 PE=2 SV=3	1	1	1	1	2.5	2.5	2.5	61.625	0.0029499	0.70856	2318000	3173700	36	64390	88158	3108500	3262900	1	1	3	Q5SRN2	1	1	1	1	1	1	2.5	2.5	563	563	By MS/MS	By MS/MS	253	1024	TRUE	1092	8003;8004;8005;8006;8007;8008;8009;8010;8011	7801;7802;7803	7801						-1
Q6NXG1	Epithelial splicing regulatory protein 1	ESRP1	sp|Q6NXG1|ESRP1_HUMAN Epithelial splicing regulatory protein 1 OS=Homo sapiens (Human) OX=9606 GN=ESRP1 PE=1 SV=2	2	3	3	3	5.1	0	2.2	75.585	0	4.4537	0	2909700	34	0	85578	0	2695700	0	0	3	Q6NXG1;Q9H6T0	0	1	0	1	0	1	5.1	5.1	681	681;727		By matching	265	1140;2568;3017	True;True;True	1212;2773;3258	8754;8755;8756;8757;8758;8759;24106;24107;24108;27875	8335;8336;25484;29260	8335;25484;29260						-1;-1
Q7Z3C6	Autophagy-related protein 9A	ATG9A	sp|Q7Z3C6|ATG9A_HUMAN Autophagy-related protein 9A OS=Homo sapiens (Human) OX=9606 GN=ATG9A PE=1 SV=3	1	3	3	3	4.1	0	0	94.446	0	1.3205	0	0	39	0	0	0	0	0	0	3	Q7Z3C6	0	0	0	0	0	0	4.1	4.1	839	839			275	380;641;2390	True;True;True	398;681;2578	2894;2895;2896;5199;5200;5201;22642;22643	2588;5011;23918	2588;5011;23918						-1
Q86TJ2	Transcriptional adapter 2-beta	TADA2B	sp|Q86TJ2|TAD2B_HUMAN Transcriptional adapter 2-beta OS=Homo sapiens (Human) OX=9606 GN=TADA2B PE=1 SV=2	1	1	1	1	1.7	1.7	1.7	48.47	0.0080645	0.2464	1707800	1377200	16	106740	86076	550490	423800	0	0	3	Q86TJ2	1	1	1	1	1	1	1.7	1.7	420	420	By MS/MS	By matching	279	1733	TRUE	1853	16848;16849;16850;16851;16852;16853;16854;16855;16856;16857;16858;16859;16860;16861;16862;16863	18520;18521;18522	18521						-1
Q86XZ4	Spermatogenesis-associated serine-rich protein 2	SPATS2	sp|Q86XZ4|SPAS2_HUMAN Spermatogenesis-associated serine-rich protein 2 OS=Homo sapiens (Human) OX=9606 GN=SPATS2 PE=1 SV=1	1	3	3	3	9.5	5	9.5	59.544	0	15.937	4866400	6053800	27	180240	224220	4081800	3406400	2	1	3	Q86XZ4	2	3	2	3	2	3	9.5	9.5	545	545	By MS/MS	By MS/MS	284	2432;2487;2591	True;True;True	2621;2683;2797	22906;22907;22908;22909;22910;22911;22912;23544;24325;24326;24327;24328;24329;24330	24123;24124;25123;25649	24124;25123;25649	264;265		221;223			-1
Q92804	TATA-binding protein-associated factor 2N	TAF15	sp|Q92804|RBP56_HUMAN TATA-binding protein-associated factor 2N OS=Homo sapiens (Human) OX=9606 GN=TAF15 PE=1 SV=1	1	3	1	1	5.9	4.4	2.4	61.829	0.0029762	0.7542	1057800	0	31	34123	0	953130	0	0	0	3	Q92804	2	1	1	0	1	0	2	2	592	592	By MS/MS	By matching	313	15;662;862	False;True;False	16;704;922	116;5326;5327;5328;5329;5330;5331;5332;5333;5334;6867;6868;6869;6870;6871;6872;6873;6874;6875	86;5126;5127;5128;5129;7022;7023;7024;7025;7026;7027;7028;7029;7030	86;5128;7024						-1
Q96NJ6	Zinc finger protein 3 homolog	ZFP3	sp|Q96NJ6|ZFP3_HUMAN Zinc finger protein 3 homolog OS=Homo sapiens (Human) OX=9606 GN=ZFP3 PE=1 SV=1	1	1	1	1	2.6	2.6	0	57.661	0.0056818	0.43809	144680000	0	27	5358600	0	188720000	0	1	0	3	Q96NJ6	1	0	1	0	1	0	2.6	2.6	502	502	By MS/MS		326	90	TRUE	96	642;643;644	693;694;695	693						-1
Q96S97	Myeloid-associated differentiation marker	MYADM	sp|Q96S97|MYADM_HUMAN Myeloid-associated differentiation marker OS=Homo sapiens (Human) OX=9606 GN=MYADM PE=1 SV=2	1	1	1	1	3.1	3.1	3.1	35.273	0	3.2204	2538700	6672900	7	362670	953270	3627800	7310400	1	1	3	Q96S97	1	1	1	1	1	1	3.1	3.1	322	322	By MS/MS	By MS/MS	331	181	TRUE	190	1465;1466;1467;1468;1469;1470;1471	1456;1457;1458	1456						-1
Q99959	Plakophilin-2	PKP2	sp|Q99959|PKP2_HUMAN Plakophilin-2 OS=Homo sapiens (Human) OX=9606 GN=PKP2 PE=1 SV=2	1	3	3	3	3.7	1.5	3.7	97.414	0	1.855	327850	5338500	51	6428.5	104680	708560	2271900	0	3	3	Q99959	1	3	1	3	1	3	3.7	3.7	881	881	By matching	By MS/MS	335	428;2524;3146	True;True;True	453;2725;3395	3262;3263;23785;23786;23787;23788;23789;28773;28774	2873;25259;30153	2873;25259;30153						-1
Q9C0C2	182 kDa tankyrase-1-binding protein	TNKS1BP1	sp|Q9C0C2|TB182_HUMAN 182 kDa tankyrase-1-binding protein OS=Homo sapiens (Human) OX=9606 GN=TNKS1BP1 PE=1 SV=4	1	2	2	2	1.3	0	0	181.79	0	1.6993	0	0	88	0	0	0	0	0	0	3	Q9C0C2	0	0	0	0	0	0	1.3	1.3	1729	1729			348	731;1817	True;True	783;1940	5811;5812;17498;17499	5543;5544;19110	5543;19110						-1
Q9UEW8	STE20/SPS1-related proline-alanine-rich protein kinase	STK39	sp|Q9UEW8|STK39_HUMAN STE20/SPS1-related proline-alanine-rich protein kinase OS=Homo sapiens (Human) OX=9606 GN=STK39 PE=1 SV=3	1	3	3	3	6.2	0	4	59.473	0	8.5881	0	1613200	21	0	76821	0	496360	0	0	3	Q9UEW8	0	2	0	2	0	2	6.2	6.2	545	545		By matching	382	532;715;2324	True;True;True	567;765;2510	4250;5717;5718;5719;22190;22191;22192;22193;22194	3986;5479;23562	3986;5479;23562						-1
Q9UJS0	Calcium-binding mitochondrial carrier protein Aralar2	SLC25A13	sp|Q9UJS0|CMC2_HUMAN Calcium-binding mitochondrial carrier protein Aralar2 OS=Homo sapiens (Human) OX=9606 GN=SLC25A13 PE=1 SV=2	1	6	3	3	9.9	8	8	74.175	0	8.203	1223400	2001600	34	35983	58871	1055600	1243300	0	0	3	Q9UJS0	5	5	2	2	2	2	5.6	5.6	675	675	By MS/MS	By MS/MS	388	952;1532;1771;1826;2788;3081	True;True;False;False;True;False	1012;1637;1892;1949;3008;3327	7489;7490;7491;7492;7493;7494;15108;15109;15110;15111;15112;15113;15114;15115;15116;17065;17066;17067;17068;17069;17070;17071;17072;17550;17551;17552;17553;17554;17555;17556;17557;17558;25646;28332;28333;28334;28335;28336;28337;28338;28339;28340	7418;17048;18650;19134;19135;19136;19137;19138;26927;29749;29750;29751;29752;29753;29754;29755	7418;17048;18650;19138;26927;29749						-1
Q9UKV5	E3 ubiquitin-protein ligase AMFR	AMFR	sp|Q9UKV5|AMFR_HUMAN E3 ubiquitin-protein ligase AMFR OS=Homo sapiens (Human) OX=9606 GN=AMFR PE=1 SV=2	1	1	1	1	1.4	1.4	1.4	72.995	0.0081081	0.25026	679370	1124300	28	24263	40155	770310	1265800	0	1	3	Q9UKV5	1	1	1	1	1	1	1.4	1.4	643	643	By matching	By MS/MS	392	1290	TRUE	1380	12115;12116;12117;12118;12119;12120;12121;12122;12123	13345;13346;13347	13345						-1
Q9Y5X1	Sorting nexin-9	SNX9	sp|Q9Y5X1|SNX9_HUMAN Sorting nexin-9 OS=Homo sapiens (Human) OX=9606 GN=SNX9 PE=1 SV=1	1	2	2	2	3.5	2.4	2.4	66.591	0	25.174	433590	480910	23	18852	20909	723350	667030	0	0	3	Q9Y5X1	1	1	1	1	1	1	3.5	3.5	595	595	By matching	By matching	401	749;2598	True;True	802;2804	5946;5947;5948;5949;24373;24374;24375;24376;24377;24378	5641;5642;25691	5641;25691						-1
Q9Y6J9	TAF6-like RNA polymerase II p300/CBP-associated factor-associated factor 65 kDa subunit 6L	TAF6L	sp|Q9Y6J9|TAF6L_HUMAN TAF6-like RNA polymerase II p300/CBP-associated factor-associated factor 65 kDa subunit 6L OS=Homo sapiens (Human) OX=9606 GN=TAF6L PE=1 SV=1	1	2	2	2	3.4	3.4	3.4	67.814	0	1.3191	3644400	4388900	29	125670	151340	2104400	2927900	0	2	3	Q9Y6J9	2	2	2	2	2	2	3.4	3.4	622	622	By MS/MS	By MS/MS	403	569;2590	True;True	607;2796	4745;4746;4747;4748;4749;4750;4751;4752;4753;24319;24320;24321;24322;24323;24324	4638;4639;25648	4639;25648						-1
A3KN83	Protein strawberry notch homolog 1	SBNO1	sp|A3KN83|SBNO1_HUMAN Protein strawberry notch homolog 1 OS=Homo sapiens (Human) OX=9606 GN=SBNO1 PE=1 SV=1	1	1	1	1	0.9	0	0.9	154.31	0.0083102	0.30707	0	8660200	64	0	135320	0	8660200	0	1	2	A3KN83	0	1	0	1	0	1	0.9	0.9	1393	1393		By MS/MS	5	567	TRUE	605	4735;4736;4737	4631;4632	4631	0;1;2		203;208;210			-1
P08779	Keratin, type I cytoskeletal 16	KRT16	sp|P08779|K1C16_HUMAN Keratin, type I cytoskeletal 16 OS=Homo sapiens GN=KRT16 PE=1 SV=4	2	13	2	2	25.4	16.3	15.6	51.267	0	1.4669	826580	0	29	28503	0	1192700	0	0	0	2	P08779;CON__sp|P08779|K1C16_HUMAN	8	7	1	0	1	0	5.1	5.1	473	473;473	By matching	By matching	28	145;217;260;261;1004;1311;1486;1527;1529;2694;2758;2919;3003	False;True;False;False;False;False;False;False;False;True;False;False;False	152;231;274;275;1069;1401;1588;1632;1634;2908;2974;3151;3243;3244	1093;1094;1095;1096;1097;1098;1099;1100;1736;2069;2070;2071;2072;2073;2074;2075;2076;2077;7844;7845;7846;7847;7848;7849;12259;12260;12261;12262;12263;12264;12265;14741;14742;14743;15071;15072;15073;15074;15075;15076;15077;15078;15079;15088;15089;15090;15091;15092;25073;25074;25075;25076;25077;25078;25079;25443;25444;25445;25446;25447;25448;27055;27056;27057;27058;27059;27778;27779;27780;27781;277…	1081;1082;1083;1084;1085;1086;1698;1992;1993;1994;7682;7683;7684;7685;7686;13456;13457;13458;13459;16704;16705;16706;16707;17027;17028;17029;17030;17031;17032;17036;17037;17038;17039;17040;17041;26390;26650;28439;28440;29126;29127;29128;29129;29130;29131;29132;29133;29134;29135;29136;29137;29138;29139;29140;29141;29142;29143;29144;29145;29146;29147;29148;29149;29150;29151;29152;29153;29154;29155;…	1086;1698;1993;1994;7682;13456;16705;17029;17040;26390;26650;28439;29152	9		121		+	-1;-1
Q04695	Keratin, type I cytoskeletal 17	KRT17	sp|Q04695|K1C17_HUMAN Keratin, type I cytoskeletal 17 OS=Homo sapiens GN=KRT17 PE=1 SV=2	4	10	2	1	21.1	10.4	11.6	48.105	0	8.7963	750940	0	29	25894	0	882410	0	0	0	2	Q04695;CON__sp|Q04695|K1C17_HUMAN;CON__sp|Q9QWL7|K1C17_MOUSE;CON__sp|Q99PS0|K1C23_MOUSE	5	5	1	0	1	0	4.9	2.8	432	432;432;433;422	By matching	By matching	36	146;281;709;1254;1486;1527;1529;1971;2758;2919	True;True;False;False;False;False;False;False;False;False	153;296;759;1337;1338;1588;1632;1634;2128;2129;2974;3151	1101;1102;1103;1104;1105;2218;2219;5679;5680;5681;5682;5683;5684;5685;5686;11442;11443;11444;11445;11446;11447;11448;11449;11450;14741;14742;14743;15071;15072;15073;15074;15075;15076;15077;15078;15079;15088;15089;15090;15091;15092;19543;19544;19545;19546;19547;19548;25443;25444;25445;25446;25447;25448;27055;27056;27057;27058;27059	1087;2113;5455;5456;5457;5458;5459;12251;12252;16704;16705;16706;16707;17027;17028;17029;17030;17031;17032;17036;17037;17038;17039;17040;17041;21363;21364;26650;28439;28440	1087;2113;5458;12251;16705;17029;17040;21364;26650;28439					+	-1;-1;-1;-1
P04049	RAF proto-oncogene serine/threonine-protein kinase	RAF1	sp|P04049|RAF1_HUMAN RAF proto-oncogene serine/threonine-protein kinase OS=Homo sapiens (Human) OX=9606 GN=RAF1 PE=1 SV=1	1	3	2	1	5.1	5.1	5.1	73.051	0.0057143	0.48546	3344300	6996200	37	90387	189090	1973400	4662800	0	2	2	P04049	3	3	2	2	1	1	3.7	2	648	648	By matching	By MS/MS	88	1191;2341;3019	True;False;True	1266;2528;3260	9608;9609;9610;9611;9612;22316;22317;22318;22319;22320;22321;22322;27877;27878;27879;27880;27881	9841;23684;23685;23686;29262	9841;23684;29262						-1
P07384	Calpain-1 catalytic subunit	CAPN1	sp|P07384|CAN1_HUMAN Calpain-1 catalytic subunit OS=Homo sapiens (Human) OX=9606 GN=CAPN1 PE=1 SV=1	1	2	2	2	3.9	0	0	81.889	0	2.7655	0	0	36	0	0	0	0	0	0	2	P07384	0	0	0	0	0	0	3.9	3.9	714	714			98	2286;3113	True;True	2466;3360	21870;28559	23360;29954	23360;29954						-1
P10599	Thioredoxin	TXN	sp|P10599|THIO_HUMAN Thioredoxin OS=Homo sapiens (Human) OX=9606 GN=TXN PE=1 SV=3	1	2	2	2	23.8	0	0	11.737	0	1.8925	0	0	7	0	0	0	0	0	0	2	P10599	0	0	0	0	0	0	23.8	23.8	105	105			112	1901;2612	True;True	2034;2818	18161;24454	19752;25760	19752;25760						-1
P23469	Receptor-type tyrosine-protein phosphatase epsilon	PTPRE	sp|P23469|PTPRE_HUMAN Receptor-type tyrosine-protein phosphatase epsilon OS=Homo sapiens (Human) OX=9606 GN=PTPRE PE=1 SV=1	1	2	2	2	2.9	2.9	2.9	80.641	0	2.1883	1318100	2544300	34	38768	74833	629780	1679600	0	2	2	P23469	2	2	2	2	2	2	2.9	2.9	700	700	By MS/MS	By MS/MS	135	2845;2906	True;True	3073;3138	26516;26517;26518;26519;26520;26521;26522;26945;26946;26947	28037;28349	28037;28349						-1
P35269	General transcription factor IIF subunit 1	GTF2F1	sp|P35269|T2FA_HUMAN General transcription factor IIF subunit 1 OS=Homo sapiens (Human) OX=9606 GN=GTF2F1 PE=1 SV=2	1	2	2	2	5.2	0	0	58.24	0	4.5595	0	0	20	0	0	0	0	0	0	2	P35269	0	0	0	0	0	0	5.2	5.2	517	517			150	19;131	True;True	20;138	136;137;138;977	97;979	97;979						-1
P61221	ATP-binding cassette sub-family E member 1	ABCE1	sp|P61221|ABCE1_HUMAN ATP-binding cassette sub-family E member 1 OS=Homo sapiens (Human) OX=9606 GN=ABCE1 PE=1 SV=1	1	2	2	2	3.5	0	0	67.314	0.002907	0.59753	0	0	30	0	0	0	0	0	0	2	P61221	0	0	0	0	0	0	3.5	3.5	599	599			178	2243;2818	True;True	2420;3043	21619;26137	23169;27457	23169;27457						-1
P80108	Phosphatidylinositol-glycan-specific phospholipase D	GPLD1	sp|P80108|PHLD_HUMAN Phosphatidylinositol-glycan-specific phospholipase D OS=Homo sapiens (Human) OX=9606 GN=GPLD1 PE=1 SV=3	1	1	1	1	1.3	1.3	1.3	92.335	0.0029586	0.73155	622320	791440	39	15957	20293	786490	773330	0	0	2	P80108	1	1	1	1	1	1	1.3	1.3	840	840	By matching	By matching	184	136	TRUE	143	1019;1020;1021;1022;1023;1024	1007;1008	1007						-1
Q00325	Phosphate carrier protein, mitochondrial	SLC25A3	sp|Q00325|MPCP_HUMAN Phosphate carrier protein, mitochondrial OS=Homo sapiens (Human) OX=9606 GN=SLC25A3 PE=1 SV=2	1	1	1	1	3.3	3.3	3.3	40.094	0	3.8511	2724500	3996700	18	151360	222040	3979400	4475400	1	1	2	Q00325	1	1	1	1	1	1	3.3	3.3	362	362	By MS/MS	By MS/MS	186	1289	TRUE	1379	12108;12109;12110;12111;12112;12113;12114	13343;13344	13343						-1
Q13085	Acetyl-CoA carboxylase 1;Biotin carboxylase	ACACA	sp|Q13085|ACACA_HUMAN Acetyl-CoA carboxylase 1 OS=Homo sapiens (Human) OX=9606 GN=ACACA PE=1 SV=2	1	1	1	1	1.1	1.1	1.1	265.55	0	8.8075	526850	678420	120	4390.4	5653.5	724240	718060	0	0	2	Q13085	1	1	1	1	1	1	1.1	1.1	2346	2346	By matching	By matching	211	683	TRUE	731	5542;5543;5544;5545;5546;5547;5548	5352;5353	5353						-1
Q14680	Maternal embryonic leucine zipper kinase	MELK	sp|Q14680|MELK_HUMAN Maternal embryonic leucine zipper kinase OS=Homo sapiens (Human) OX=9606 GN=MELK PE=1 SV=3	1	2	2	2	3.8	3.8	3.8	74.641	0	2.4723	1541100	4681400	37	41652	126520	922990	3813600	0	2	2	Q14680	2	2	2	2	2	2	3.8	3.8	651	651	By matching	By MS/MS	225	425;1833	True;True	450;1956	3241;3242;3243;3244;3245;3246;17580;17581;17582;17583;17584;17585;17586	2866;19146	2866;19146						-1
Q6UWP8	Suprabasin	SBSN	sp|Q6UWP8|SBSN_HUMAN Suprabasin OS=Homo sapiens (Human) OX=9606 GN=SBSN PE=1 SV=2	1	2	2	2	15.3	0	0	60.54	0	2.8017	0	0	32	0	0	0	0	0	0	2	Q6UWP8	0	0	0	0	0	0	15.3	15.3	590	590			269	765;766	True;True	819;820	6047;6048;6049;6050	5739;5740	5739;5740						-1
Q86W50	Methyltransferase-like protein 16	METTL16	sp|Q86W50|MET16_HUMAN RNA N6-adenosine-methyltransferase METTL16 OS=Homo sapiens (Human) OX=9606 GN=METTL16 PE=1 SV=2	1	1	1	1	2.1	2.1	2.1	63.62	0.0030675	0.89847	422300	513570	25	16892	20543	571020	551370	0	0	2	Q86W50	1	1	1	1	1	1	2.1	2.1	562	562	By matching	By matching	283	206	TRUE	219	1659;1660;1661;1662;1663	1621;1622	1622						-1
Q8N543	Prolyl 3-hydroxylase OGFOD1	OGFOD1	sp|Q8N543|OGFD1_HUMAN Prolyl 3-hydroxylase OGFOD1 OS=Homo sapiens (Human) OX=9606 GN=OGFOD1 PE=1 SV=1	1	2	2	2	3.9	0	0	63.245	0	1.2778	0	0	24	0	0	0	0	0	0	2	Q8N543	0	0	0	0	0	0	3.9	3.9	542	542			294	2272;2659	True;True	2451;2868	21809;24751	23330;26020	23330;26020						-1
Q8NHH1	Tubulin polyglutamylase TTLL11	TTLL11	sp|Q8NHH1|TTL11_HUMAN Tubulin polyglutamylase TTLL11 OS=Homo sapiens (Human) OX=9606 GN=TTLL11 PE=1 SV=2	1	1	1	1	1.1	1.1	1.1	87.611	0.0081744	0.26941	6900200	5815700	43	160470	135250	9714700	7260800	0	0	2	Q8NHH1	1	1	1	1	1	1	1.1	1.1	800	800	By MS/MS	By MS/MS	297	2	TRUE	2	10;11;12;13;14;15;16;17	9;10;11;12	12						-1
Q8WVM8	Sec1 family domain-containing protein 1	SCFD1	sp|Q8WVM8|SCFD1_HUMAN Sec1 family domain-containing protein 1 OS=Homo sapiens (Human) OX=9606 GN=SCFD1 PE=1 SV=4	1	1	1	1	2.3	0	0	72.379	0	5.3337	0	0	34	0	0	0	0	0	0	2	Q8WVM8	0	0	0	0	0	0	2.3	2.3	642	642			306	0	TRUE	0	0;1	0;1	1						-1
Q92485	Acid sphingomyelinase-like phosphodiesterase 3b	SMPDL3B	sp|Q92485|ASM3B_HUMAN Acid sphingomyelinase-like phosphodiesterase 3b OS=Homo sapiens (Human) OX=9606 GN=SMPDL3B PE=1 SV=2	1	1	1	1	2.2	2.2	2.2	50.813	0	1.65	1322000	2961500	18	73444	164530	1243500	3625700	0	1	2	Q92485	1	1	1	1	1	1	2.2	2.2	455	455	By MS/MS	By MS/MS	311	1139	TRUE	1211	8746;8747;8748;8749;8750;8751;8752;8753	8333;8334	8333						-1
Q9P035	Very-long-chain (3R)-3-hydroxyacyl-CoA dehydratase 3	HACD3	sp|Q9P035|HACD3_HUMAN Very-long-chain (3R)-3-hydroxyacyl-CoA dehydratase 3 OS=Homo sapiens (Human) OX=9606 GN=HACD3 PE=1 SV=2	1	2	2	2	6.9	6.9	6.9	43.159	0	4.2311	2785500	5032700	15	185700	335510	1657800	3844300	0	2	2	Q9P035	2	2	2	2	2	2	6.9	6.9	362	362	By matching	By MS/MS	377	1581;2281	True;True	1688;2460	15478;15479;15480;15481;15482;15483;15484;15485;21843;21844;21845;21846;21847;21848;21849	17281;23347	17281;23347						-1
Q9UHY1	Nuclear receptor-binding protein	NRBP1	sp|Q9UHY1|NRBP_HUMAN Nuclear receptor-binding protein OS=Homo sapiens (Human) OX=9606 GN=NRBP1 PE=1 SV=1	1	2	2	2	5	0	0	59.844	0	3.1864	0	0	17	0	0	0	0	0	0	2	Q9UHY1	0	0	0	0	0	0	5	5	535	535			387	294;1823	True;True	311;1946	2344;17544	2205;19131	2205;19131						-1
O82803	Small rubber particle protein	SRPP	sp|O82803|SRPP_HEVBR Small rubber particle protein OS=Hevea brasiliensis GN=SRPP PE=1 SV=1	1	1	1	1	4.9	0	0	22.344	0.0032258	1.2292	0	0	14	0	0	0	0	0	0	1	CON__sp|O82803|SRPP_HEVBR	0	0	0	0	0	0	4.9	4.9	204	204			6	58	TRUE	62	397;398;399;400;401	470	470					+	-1
P02440	Keratin-associated protein 1-4;Keratin-associated protein 1-5;Keratin-associated protein 1-3;Keratin-associated protein 1-1	KRTAP1-4;KRTAP1-5;KRTAP1-3;KRTAP1-1	sp|P02440|KRB2C_SHEEP Keratin, high-sulfur matrix protein, B2C OS=Ovis aries PE=1 SV=2	8	1	1	1	6.6	6.6	0	15.607	0	18.454	3206800	0	3	1068900	0	0	0	1	0	1	CON__sp|P02440|KRB2C_SHEEP;CON__sp|P02439|KRB2B_SHEEP;CON__sp|P02438|KRB2A_SHEEP;CON__sp|P08131|KRB2D_SHEEP;P0C5Y4;Q9BYS1;Q8IUG1;Q07627	1	0	1	0	1	0	6.6	6.6	152	152;156;172;182;121;174;177;177	By MS/MS		17	2099	TRUE	2271	20578	22214	22214					+	-1;-1;-1;-1;-1;-1;-1;-1
Q9BYR4	Keratin-associated protein 4-3	KRTAP4-3	sp|Q9BYR4|KRA43_HUMAN Keratin-associated protein 4-3 OS=Homo sapiens GN=KRTAP4-3 PE=2 SV=2	2	3	1	1	33.3	33.3	0	20.504	0	1.9966	2449200	0	14	174940	0	0	0	1	0	1	CON__sp|Q9BYR4|KRA43_HUMAN;Q9BYR4	3	0	1	0	1	0	23.1	23.1	195	195;195	By MS/MS		45	2097;2098;2774	False;False;True	2269;2270;2993	20576;20577;25523	22212;22213;26735	22212;22213;26735					+	-1;-1
O60716	Catenin delta-1	CTNND1	sp|O60716|CTND1_HUMAN Catenin delta-1 OS=Homo sapiens (Human) OX=9606 GN=CTNND1 PE=1 SV=1	1	1	1	1	1.2	0	0	108.17	0.0031153	0.99087	0	0	48	0	0	0	0	0	0	1	O60716	0	0	0	0	0	0	1.2	1.2	968	968			67	2362	TRUE	2550	22446;22447;22448;22449;22450;22451	23761	23761						-1
P05090	Apolipoprotein D	APOD	sp|P05090|APOD_HUMAN Apolipoprotein D OS=Homo sapiens (Human) OX=9606 GN=APOD PE=1 SV=1	1	1	1	1	6.9	0	0	21.275	0.0056657	0.42574	0	0	9	0	0	0	0	0	0	1	P05090	0	0	0	0	0	0	6.9	6.9	189	189			92	2028	TRUE	2195	19990	21717	21717						-1
P05783	Keratin, type I cytoskeletal 18	KRT18	sp|P05783|K1C18_HUMAN Keratin, type I cytoskeletal 18 OS=Homo sapiens (Human) OX=9606 GN=KRT18 PE=1 SV=2	1	3	1	1	6.5	2.1	4.9	48.057	0	1.5731	0	2311000	26	0	88886	0	2311000	0	1	1	P05783	1	2	0	1	0	1	2.8	2.8	430	430	By matching	By MS/MS	93	232;1342;1486	True;False;False	246;1436;1588	1843;1844;13030;13031;13032;13033;13034;13035;13036;13037;14741;14742;14743	1798;14620;16704;16705;16706;16707	1798;14620;16705						-1
P11387	DNA topoisomerase 1	TOP1	sp|P11387|TOP1_HUMAN DNA topoisomerase 1 OS=Homo sapiens (Human) OX=9606 GN=TOP1 PE=1 SV=2	1	1	1	1	1.6	0	0	90.725	0.0084034	0.36154	0	0	38	0	0	0	0	0	0	1	P11387	0	0	0	0	0	0	1.6	1.6	765	765			116	1584	TRUE	1691	15493;15494;15495;15496	17287	17287						-1
P17987	T-complex protein 1 subunit alpha	TCP1	sp|P17987|TCPA_HUMAN T-complex protein 1 subunit alpha OS=Homo sapiens (Human) OX=9606 GN=TCP1 PE=1 SV=1	1	1	1	1	2	0	0	60.343	0.0028653	0.52578	0	0	31	0	0	0	0	0	0	1	P17987	0	0	0	0	0	0	2	2	556	556			128	1885	TRUE	2014	18016;18017;18018;18019	19588;19589	19588	125		1			-1
P55072	Transitional endoplasmic reticulum ATPase	VCP	sp|P55072|TERA_HUMAN Transitional endoplasmic reticulum ATPase OS=Homo sapiens (Human) OX=9606 GN=VCP PE=1 SV=4	1	1	1	1	1.5	0	0	89.321	0	2.0697	0	0	45	0	0	0	0	0	0	1	P55072	0	0	0	0	0	0	1.5	1.5	806	806			174	3045	TRUE	3290	28113;28114;28115	29593	29593						-1
P55081	Microfibrillar-associated protein 1	MFAP1	sp|P55081|MFAP1_HUMAN Microfibrillar-associated protein 1 OS=Homo sapiens (Human) OX=9606 GN=MFAP1 PE=1 SV=2	1	1	1	1	3	0	0	51.958	0.0028736	0.53059	0	0	17	0	0	0	0	0	0	1	P55081	0	0	0	0	0	0	3	3	439	439			175	388	TRUE	409	2964	2664	2664						-1
P68371	Tubulin beta-4B chain	TUBB4B	sp|P68371|TBB4B_HUMAN Tubulin beta-4B chain OS=Homo sapiens (Human) OX=9606 GN=TUBB4B PE=1 SV=1	1	10	1	1	28.8	26.5	24.5	49.83	0.0056497	0.39787	965470	1570000	20	48273	78500	998380	1921500	0	1	1	P68371	9	8	1	1	1	1	2.7	2.7	445	445	By matching	By MS/MS	183	710;920;921;1268;1273;1535;1611;2054;2415;3121	False;False;False;False;True;False;False;False;False;False	760;980;981;1356;1362;1640;1720;2224;2604;3368	5687;5688;5689;5690;5691;5692;5693;5694;7279;7280;7281;7282;7283;7284;7285;7286;7287;7288;7289;7290;7291;7292;11596;11597;11598;11599;11600;11601;11602;11603;11630;11631;11632;11633;11634;11635;11636;11637;15129;15130;15131;15132;15133;15134;15663;15664;15665;15666;15667;15668;15669;15670;15671;20205;20206;20207;20208;20209;20210;20211;22808;22809;22810;22811;22812;22813;22814;22815;22816;28599;2…	5460;5461;5462;7300;7301;7302;7303;7304;7305;7306;7307;7308;7309;7310;7311;12532;12533;12534;12535;12544;17052;17053;17406;21892;21893;21894;21895;24014;24015;24016;24017;24018;24019;24020;24021;29988;29989	5462;7302;7307;12535;12544;17052;17406;21895;24019;29988	71;72;73		164;257;330			-1
Q00839	Heterogeneous nuclear ribonucleoprotein U	HNRNPU	sp|Q00839|HNRPU_HUMAN Heterogeneous nuclear ribonucleoprotein U OS=Homo sapiens (Human) OX=9606 GN=HNRNPU PE=1 SV=6	1	1	1	1	2.7	2.7	2.7	90.583	0.0032154	1.2207	515390	574560	37	13929	15529	763240	705600	0	0	1	Q00839	1	1	1	1	1	1	2.7	2.7	825	825	By matching	By matching	187	610	TRUE	650	5000;5001;5002;5003;5004;5005;5006	4875	4875						-1
Q15517	Corneodesmosin	CDSN	sp|Q15517|CDSN_HUMAN Corneodesmosin OS=Homo sapiens (Human) OX=9606 GN=CDSN PE=1 SV=3	1	1	1	1	3.4	0	0	51.522	0	1.7761	0	0	15	0	0	0	0	0	0	1	Q15517	0	0	0	0	0	0	3.4	3.4	529	529			232	1012	TRUE	1077	7894;7895	7727	7727						-1
Q2M2I8	AP2-associated protein kinase 1	AAK1	sp|Q2M2I8|AAK1_HUMAN AP2-associated protein kinase 1 OS=Homo sapiens (Human) OX=9606 GN=AAK1 PE=1 SV=3	1	1	1	1	1.9	0	0	103.88	0	9.5947	0	0	38	0	0	0	0	0	0	1	Q2M2I8	0	0	0	0	0	0	1.9	1.9	961	961			247	800	TRUE	856	6299	5957	5957						-1
Q3ZCM7	Tubulin beta-8 chain	TUBB8	sp|Q3ZCM7|TBB8_HUMAN Tubulin beta-8 chain OS=Homo sapiens (Human) OX=9606 GN=TUBB8 PE=1 SV=2	1	3	1	1	12.6	3.2	12.6	49.775	0	8.0441	0	672320	20	0	33616	0	659990	0	1	1	Q3ZCM7	1	3	0	1	0	1	7.2	7.2	444	444	By matching	By MS/MS	249	516;1535;1611	True;False;False	550;1640;1720	4139;4140;4141;15129;15130;15131;15132;15133;15134;15663;15664;15665;15666;15667;15668;15669;15670;15671	3879;17052;17053;17406	3879;17052;17406	73		257			-1
Q5TF58	Intermediate filament family orphan 2	IFFO2	sp|Q5TF58|IFFO2_HUMAN Intermediate filament family orphan 2 OS=Homo sapiens (Human) OX=9606 GN=IFFO2 PE=2 SV=3	1	1	1	1	2.3	2.3	2.3	57.327	0	3.064	328820	772960	20	16441	38648	428900	772960	0	1	1	Q5TF58	1	1	1	1	1	1	2.3	2.3	517	517	By matching	By MS/MS	258	1726	TRUE	1845	16803;16804	18469	18469						-1
Q6ZV73	FYVE, RhoGEF and PH domain-containing protein 6	FGD6	sp|Q6ZV73|FGD6_HUMAN FYVE, RhoGEF and PH domain-containing protein 6 OS=Homo sapiens (Human) OX=9606 GN=FGD6 PE=1 SV=2	1	1	1	1	0.6	0	0	160.81	0	1.6166	0	0	90	0	0	0	0	0	0	1	Q6ZV73	0	0	0	0	0	0	0.6	0.6	1430	1430			271	1149	TRUE	1222	8926;8927	8661;8662	8661						-1
Q6ZVX7	F-box only protein 50	NCCRP1	sp|Q6ZVX7|FBX50_HUMAN F-box only protein 50 OS=Homo sapiens (Human) OX=9606 GN=NCCRP1 PE=1 SV=1	1	1	1	1	4	0	0	30.847	0.0081522	0.26616	0	0	12	0	0	0	0	0	0	1	Q6ZVX7	0	0	0	0	0	0	4	4	275	275			273	2791	TRUE	3014	25688;25689;25690	26964	26964						-1
Q8N1F7	Nuclear pore complex protein Nup93	NUP93	sp|Q8N1F7|NUP93_HUMAN Nuclear pore complex protein Nup93 OS=Homo sapiens (Human) OX=9606 GN=NUP93 PE=1 SV=2	1	1	1	1	1.5	0	1.5	93.487	0.0030211	0.86159	0	0	51	0	0	0	0	0	1	1	Q8N1F7	0	1	0	1	0	1	1.5	1.5	819	819		By MS/MS	291	1846	TRUE	1969	17681	19267	19267						-1
Q8WXH0	Nesprin-2	SYNE2	sp|Q8WXH0|SYNE2_HUMAN Nesprin-2 OS=Homo sapiens (Human) OX=9606 GN=SYNE2 PE=1 SV=3	1	2	2	2	0.5	0.4	0.4	796.43	0.0030769	0.9152	0	0	397	0	0	0	0	0	0	1	Q8WXH0	1	1	1	1	1	1	0.5	0.5	6885	6885	By matching	By matching	309	619;1822	True;True	659;1945	5053;5054;5055;5056;5057;5058;17543	4915;4916;19130	4915;19130		53;54;101;102;103		5857;5860;5862;5870;5876		-1
Q92733	Proline-rich protein PRCC	PRCC	sp|Q92733|PRCC_HUMAN Proline-rich protein PRCC OS=Homo sapiens (Human) OX=9606 GN=PRCC PE=1 SV=1	1	1	1	1	2.6	0	0	52.417	0	1.98	0	0	16	0	0	0	0	0	0	1	Q92733	0	0	0	0	0	0	2.6	2.6	491	491			312	1444	TRUE	1545	14470	16506	16506						-1
Q96JX3	Protein SERAC1	SERAC1	sp|Q96JX3|SRAC1_HUMAN Protein SERAC1 OS=Homo sapiens (Human) OX=9606 GN=SERAC1 PE=1 SV=1	1	1	1	1	1.7	0	1.7	74.147	0	1.8317	0	627660	37	0	16964	0	708800	0	1	1	Q96JX3	0	1	0	1	0	1	1.7	1.7	654	654		By MS/MS	322	2709	TRUE	2923	25166;25167;25168;25169	26444	26444						-1
Q96P63	Serpin B12	SERPINB12	sp|Q96P63|SPB12_HUMAN Serpin B12 OS=Homo sapiens (Human) OX=9606 GN=SERPINB12 PE=1 SV=1	1	1	1	1	3	0	0	46.276	0.005618	0.37817	0	0	20	0	0	0	0	0	0	1	Q96P63	0	0	0	0	0	0	3	3	405	405			328	1244	TRUE	1326	10601;10602	11245	11245						-1
Q96QA5	Gasdermin-A	GSDMA	sp|Q96QA5|GSDMA_HUMAN Gasdermin-A OS=Homo sapiens (Human) OX=9606 GN=GSDMA PE=1 SV=4	1	1	1	1	2.2	0	0	49.364	0.0029412	0.68768	0	0	24	0	0	0	0	0	0	1	Q96QA5	0	0	0	0	0	0	2.2	2.2	445	445			330	1421	TRUE	1518	14209;14210	16143	16143						-1
Q9BVS4	Serine/threonine-protein kinase RIO2	RIOK2	sp|Q9BVS4|RIOK2_HUMAN Serine/threonine-protein kinase RIO2 OS=Homo sapiens (Human) OX=9606 GN=RIOK2 PE=1 SV=2	1	1	1	1	2.2	2.2	2.2	63.282	0	2.3299	1060200	1414800	22	48191	64308	1208900	1222800	0	0	1	Q9BVS4	1	1	1	1	1	1	2.2	2.2	552	552	By matching	By matching	342	1821	TRUE	1944	17535;17536;17537;17538;17539;17540;17541;17542	19129	19129						-1
Q9BWE0	Replication initiator 1	REPIN1	sp|Q9BWE0|REPI1_HUMAN Replication initiator 1 OS=Homo sapiens (Human) OX=9606 GN=REPIN1 PE=1 SV=1	1	1	1	1	2.6	2.6	2.6	63.574	0.0031746	1.1274	713390	933140	30	23780	31105	981830	983210	0	0	1	Q9BWE0	1	1	1	1	1	1	2.6	2.6	567	567	By matching	By matching	344	1687	TRUE	1801	16263;16264;16265;16266	17955	17955						-1
Q9NRF8	CTP synthase 2	CTPS2	sp|Q9NRF8|PYRG2_HUMAN CTP synthase 2 OS=Homo sapiens (Human) OX=9606 GN=CTPS2 PE=1 SV=1	1	1	1	1	2	2	2	65.677	0.0030581	0.88444	366790	981130	34	10788	28857	594320	851080	0	0	1	Q9NRF8	1	1	1	1	1	1	2	2	586	586	By matching	By matching	367	2966	TRUE	3206	27480;27481;27482;27483;27484	28891	28891						-1
Q9NZT1	Calmodulin-like protein 5	CALML5	sp|Q9NZT1|CALL5_HUMAN Calmodulin-like protein 5 OS=Homo sapiens (Human) OX=9606 GN=CALML5 PE=1 SV=2	1	1	1	1	9.6	0	0	15.892	0	2.3425	0	0	9	0	0	0	0	0	0	1	Q9NZT1	0	0	0	0	0	0	9.6	9.6	146	146			376	100	TRUE	107	763;764;765	812	812						-1
Q9UK59	Lariat debranching enzyme	DBR1	sp|Q9UK59|DBR1_HUMAN Lariat debranching enzyme OS=Homo sapiens (Human) OX=9606 GN=DBR1 PE=1 SV=2	1	1	1	1	2	2	0	61.554	0	1.4363	1024900	0	23	44562	0	1282600	0	0	0	1	Q9UK59	1	0	1	0	1	0	2	2	544	544	By matching		389	276	TRUE	290	2182;2183;2184	2083	2083						-1
O00592	Podocalyxin	PODXL	sp|O00592|PODXL_HUMAN Podocalyxin OS=Homo sapiens (Human) OX=9606 GN=PODXL PE=1 SV=2	1	1	1	1	2.3	2.3	2.3	58.635	0.002994	0.75891	0	0	23	0	0	0	0	0	0	0	O00592	1	1	1	1	1	1	2.3	2.3	558	558	By MS/MS	By MS/MS	55	1526	TRUE	1631	15040;15041;15042;15043;15044;15045;15046;15047;15048;15049;15050;15051;15052;15053;15054;15055;15056;15057;15058;15059;15060;15061;15062;15063;15064;15065;15066;15067;15068;15069;15070	16997;16998;16999;17000;17001;17002;17003;17004;17005;17006;17007;17008;17009;17010;17011;17012;17013;17014;17015;17016;17017;17018;17019;17020;17021;17022;17023;17024;17025;17026	17021		5;6;77		401;405;407		-1
O95071	E3 ubiquitin-protein ligase UBR5	UBR5	sp|O95071|UBR5_HUMAN E3 ubiquitin-protein ligase UBR5 OS=Homo sapiens (Human) OX=9606 GN=UBR5 PE=1 SV=2	1	1	1	1	0.9	0	0	309.35	0.0081301	0.26024	0	0	131	0	0	0	0	0	0	0	O95071	0	0	0	0	0	0	0.9	0.9	2799	2799			76	3062	TRUE	3307	28198;28199;28200	29640	29640		8;9;10;11;12		143;144;147;148;154		-1
P35237	Serpin B6	SERPINB6	sp|P35237|SPB6_HUMAN Serpin B6 OS=Homo sapiens (Human) OX=9606 GN=SERPINB6 PE=1 SV=3	1	1	1	1	4	0	0	42.621	0.0031447	1.0486	0	0	21	0	0	0	0	0	0	0	P35237	0	0	0	0	0	0	4	4	376	376			149	1138	TRUE	1210	8742;8743;8744;8745	8332	8332		15;81		154;159		-1
P48065	Sodium- and chloride-dependent betaine transporter	SLC6A12	sp|P48065|S6A12_HUMAN Sodium- and chloride-dependent betaine transporter OS=Homo sapiens (Human) OX=9606 GN=SLC6A12 PE=1 SV=2	1	1	1	1	2.6	2.6	2.6	69.368	0.0056338	0.38741	0	0	15	0	0	0	0	0	0	0	P48065	1	1	1	1	1	1	2.6	2.6	614	614	By MS/MS	By MS/MS	164	2322	TRUE	2507	22158;22159;22160;22161;22162;22163;22164;22165;22166;22167;22168;22169;22170;22171;22172;22173;22174;22175;22176	23524;23525;23526;23527;23528;23529;23530;23531;23532;23533;23534;23535;23536;23537;23538;23539;23540	23536		19;20;82		200;201;208		-1
Q0JRZ9	F-BAR domain only protein 2	FCHO2	sp|Q0JRZ9|FCHO2_HUMAN F-BAR domain only protein 2 OS=Homo sapiens (Human) OX=9606 GN=FCHO2 PE=1 SV=2	1	1	1	1	1.9	0	1.9	88.923	0.0082192	0.288	0	0	39	0	0	0	0	0	0	0	Q0JRZ9	0	1	0	1	0	1	1.9	1.9	810	810		By matching	205	2101	TRUE	2273	20588;20589;20590;20591	22232	22232		24;83		456;459		-1
Q8WTR2	Dual specificity protein phosphatase 19	DUSP19	sp|Q8WTR2|DUS19_HUMAN Dual specificity protein phosphatase 19 OS=Homo sapiens (Human) OX=9606 GN=DUSP19 PE=1 SV=1	1	1	1	1	6.5	6.5	6.5	24.194	0.0083333	0.3243	0	0	8	0	0	0	0	0	0	0	Q8WTR2	1	1	1	1	1	1	6.5	6.5	217	217	By matching	By matching	305	3011	TRUE	3252	27852;27853;27854;27855;27856;27857;27858;27859;27860	29248;29249;29250;29251;29252	29249		98;99		27;34		-1
Q9UQ03	Coronin-2B	CORO2B	sp|Q9UQ03|COR2B_HUMAN Coronin-2B OS=Homo sapiens (Human) OX=9606 GN=CORO2B PE=1 SV=4	1	1	1	1	2.7	2.7	2.7	54.953	0	1.4654	0	0	24	0	0	0	0	0	0	0	Q9UQ03	1	1	1	1	1	1	2.7	2.7	480	480	By MS/MS	By MS/MS	394	1930	TRUE	2076;2077	18458;18459;18460;18461;18462;18463;18464;18465;18466;18467;18468;18469;18470;18471;18472;18473;18474;18475	20161;20162;20163	20162	343;344	57	1;6	7		-1
Q9Y5Z0	Beta-secretase 2	BACE2	sp|Q9Y5Z0|BACE2_HUMAN Beta-secretase 2 OS=Homo sapiens (Human) OX=9606 GN=BACE2 PE=1 SV=1	1	1	1	1	2.9	2.9	2.9	56.18	0.0028986	0.59019	0	0	18	0	0	0	0	0	0	0	Q9Y5Z0	1	1	1	1	1	1	2.9	2.9	518	518	By MS/MS	By MS/MS	402	1306	TRUE	1396	12232;12233;12234;12235;12236;12237	13440	13440		67;68		367;368		-1
