# Supplementary material
Source: HighWire-hosted journal article supplement (doi:10.1101/rna.079714.123)
Supplement: Supplemental_Table_2_GOterm.xlsx [file Supplemental_Table_2_GOterm.xlsx]

## Sheet: Description
Optimized Infra-red photoactivatable ribonucleoside-enhanced crosslinking and immunoprecipitation (IR-PAR-CLIP) protocol identifies novel IGF2BP3-interacting RNAs in colon cancer cells
Aleksandra S Anisimova, G Elif Karagöz
Supplementary Table 1 (Fig. 6)
GO term analysis of biological process (BP) categories enriched in HCT116 targets identified in this work with both RNase I and RNase T1 (4181 genes, HCT116 all) or when the previously identified targets are excluded (1376 genes, HCT116 only).

## Sheet: HCT116 all
	ID	Description	GeneRatio	BgRatio	pvalue	p.adjust	qvalue	geneID	Count
GO:0006402	GO:0006402	mRNA catabolic process	198/4092	373/17320	2.07348e-35	1.29551e-31	9.94396e-32	RPS20/CSDE1/RNH1/PSMA4/THRAP3/PUM2/RC3H2/YBX3/RPL18/YBX1/ELAVL1/PSME4/PABPC1/RPL31/IGF2BP2/CNOT4/XPO1/TNPO1/DIS3/RPS5/KHSRP/XRN2/RPL6/RPLP0/PCBP4/PABPC4/TNRC6A/ALKBH5/HNRNPC/AGO1/PSMD5/PSMD8/GTPBP1/RPL3/TNRC6B/PSMB5/APEX1/PSMA6/PSMA7/PSMD10/PSMD7/GSPT1/EIF3E/RPS16/RPS19/PPP2R1A/RPL18A/ZC3HAV1/HSPB1/PSMA2/MTPAP/RPL28/RPL19/PSMD3/CASC3/DDX5/PSMD11/HSPA8/DCPS/DDX6/RPS13/MAPK14/RPS12/TENT5A/TENT4A/CN…	198
GO:0006401	GO:0006401	RNA catabolic process	207/4092	412/17320	1.62257e-32	5.06891e-29	3.89075e-29	RPS20/CSDE1/RNH1/PSMA4/THRAP3/PUM2/RC3H2/YBX3/RPL18/YBX1/ELAVL1/PSME4/PABPC1/RPL31/IGF2BP2/RBM7/CNOT4/XPO1/TNPO1/DIS3/RPS5/KHSRP/XRN2/RPL6/RPLP0/PCBP4/PABPC4/TNRC6A/ALKBH5/HNRNPC/AGO1/PSMD5/PSMD8/GTPBP1/RPL3/TNRC6B/PSMB5/APEX1/PSMA6/PSMA7/PSMD10/PSMD7/GSPT1/EIF3E/RPS16/RPS19/PPP2R1A/RPL18A/ZC3HAV1/HSPB1/PSMA2/MTPAP/RPL28/RPL19/PSMD3/CASC3/DDX5/PSMD11/HSPA8/DCPS/DDX6/RPS13/MAPK14/RPS12/TENT5A/TENT…	207
GO:0006413	GO:0006413	translational initiation	122/4092	192/17320	3.22874e-32	6.72439e-29	5.16145e-29	DHX33/RPS20/EIF2AK2/EIF4B/RPL18/PABPC1/RPL31/EIF4G3/RPS5/EIF2AK1/RPL6/RPLP0/EIF3L/RPL3/EIF3D/EIF5/DNAJC3/EIF3J/EIF3E/RPS16/RPS19/RPL18A/HSPB1/EIF3B/EIF4H/EIF3A/RPL28/RPL19/RPS6KB1/EIF4G2/RPS13/RPS12/NCBP2/EIF1B/EIF4G1/RPL22/RPS25/PAIP2/KHDRBS1/RPL5/AGO2/RPL23/EIF2S2/ATF4/EIF2AK4/EIF2S3/RPL27/EIF2S1/RPS15A/EIF4E2/RPL35/RPS6/RPLP1/RPS24/RPS2/RPS11/RPL13A/RPL11/RPS8/RPS27A/POLR2D/RPL32/EIF2A/RPL37/R…	122
GO:0072599	GO:0072599	establishment of protein localization to endoplasmic reticulum	85/4092	114/17320	1.46601e-30	2.28991e-27	1.75767e-27	SEC62/RPS20/HSPA5/SEC61A1/RPL18/TRAM2/SEC61A2/TRAM1/RPL31/RPS5/RAB10/RPL6/RPLP0/RPL3/CHMP4B/SGTA/RPS16/RPS19/RPL18A/RPL28/RPL19/RPS13/RPS12/SSR3/SPCS1/RAB3GAP1/RPL22/RPS25/RAB3GAP2/RPL5/RPL23/SPCS3/RPL27/RPS15A/RPL35/RPS6/RPLP1/RPS24/SRP14/PMM2/RPS2/RPS11/RPL13A/RPL11/RPS8/SRP9/RPS27A/RPL32/SRPRB/RPL37/RPL10/RPS3/SRP19/RPL30/RPL8/RPL26/RPL29/RPL9/RPS14/RPL27A/RPL13/SRP68/RPSA/RPL38/RPL4/RPL15/SRP…	85
GO:0045047	GO:0045047	protein targeting to ER	82/4092	110/17320	1.62226e-29	2.02718e-26	1.55601e-26	SEC62/RPS20/HSPA5/SEC61A1/RPL18/TRAM2/SEC61A2/TRAM1/RPL31/RPS5/RPL6/RPLP0/RPL3/CHMP4B/SGTA/RPS16/RPS19/RPL18A/RPL28/RPL19/RPS13/RPS12/SSR3/SPCS1/RPL22/RPS25/RPL5/RPL23/SPCS3/RPL27/RPS15A/RPL35/RPS6/RPLP1/RPS24/SRP14/PMM2/RPS2/RPS11/RPL13A/RPL11/RPS8/SRP9/RPS27A/RPL32/SRPRB/RPL37/RPL10/RPS3/SRP19/RPL30/RPL8/RPL26/RPL29/RPL9/RPS14/RPL27A/RPL13/SRP68/RPSA/RPL38/RPL4/RPL15/SRP72/RPLP2/RPS17/RPL35A/SR…	82
GO:0000956	GO:0000956	nuclear-transcribed mRNA catabolic process	124/4092	207/17320	3.78936e-29	3.94598e-26	3.02883e-26	RPS20/CSDE1/THRAP3/RC3H2/RPL18/PABPC1/RPL31/CNOT4/DIS3/RPS5/XRN2/RPL6/RPLP0/TNRC6A/AGO1/RPL3/TNRC6B/GSPT1/EIF3E/RPS16/RPS19/PPP2R1A/RPL18A/MTPAP/RPL28/RPL19/CASC3/DDX5/DCPS/DDX6/RPS13/RPS12/TENT4A/CNOT6/PPP2CA/NCBP2/EIF4G1/RPL22/SMG7/RPS25/ETF1/TENT4B/RPL5/AGO2/CNOT1/RPL23/ZFP36/LSM4/EXOSC2/RPL27/RPS15A/TUT4/RC3H1/RPL35/RPS6/RPLP1/RPS24/CNOT6L/WDR61/RPS2/TOB1/EIF4A3/NT5C3B/RPS11/RPL13A/RPL11/RPS8…	124
GO:0006613	GO:0006613	cotranslational protein targeting to membrane	76/4092	99/17320	6.57109e-29	5.65707e-26	4.34221e-26	SEC62/RPS20/SEC61A1/RPL18/TRAM2/SEC61A2/TRAM1/RPL31/RPS5/RPL6/RPLP0/RPL3/RPS16/RPS19/RPL18A/RPL28/RPL19/RPS13/RPS12/SSR3/RPL22/RPS25/RPL5/SSR1/RPL23/RPL27/RPS15A/RPL35/RPS6/RPLP1/RPS24/SRP14/RPS2/RPS11/RPL13A/RPL11/RPS8/SRP9/RPS27A/RPL32/RPL37/RPL10/RPS3/SRP19/RPL30/RPL8/RPL26/RPL29/SSR2/RPL9/RPS14/RPL27A/RPL13/SRP68/RPSA/ARL6IP1/RPL38/RPL4/RPL15/SRP72/RPLP2/RPS17/RPL35A/SRPRA/RPS23/RPL14/RPL37A/…	76
GO:0090150	GO:0090150	establishment of protein localization to membrane	171/4092	331/17320	7.24337e-29	5.65707e-26	4.34221e-26	SEC62/RPS20/BID/ZDHHC6/HSPA5/GOPC/VAMP3/SEC61A1/RPL18/TRAM2/SEC61A2/TRAM1/VPS35/RPL31/NSF/HSP90AA1/RPS5/RAB10/BAX/PPP1R13B/RPL6/RPLP0/TOMM22/RPL3/MIEF1/CHMP4B/GGA2/RAB11A/ZDHHC2/SGTA/RPS16/AKT2/RPS19/RPL18A/RPL28/RPL19/YWHAE/RPS13/RPS12/GOLPH3/TFDP2/SSR3/SPTBN1/GORASP2/RAB3GAP1/ICMT/RPL22/BLZF1/RPS25/RAB3GAP2/LYPLA1/RPL5/ACSL3/VAMP7/SSR1/BBS2/RPL23/YWHAH/CLIP1/RPL27/YWHAQ/RPS15A/ZDHHC4/NMT1/RPL35…	171
GO:0070972	GO:0070972	protein localization to endoplasmic reticulum	96/4092	142/17320	8.94041e-29	6.20663e-26	4.76404e-26	SEC62/RPS20/GABARAPL2/HSPA5/SEC61A1/RPL18/TRAM2/SEC61A2/TRAM1/RPL31/RPS5/RAB10/RPL6/RPLP0/KDELR3/RPL3/CHMP4B/VAPA/SGTA/RPS16/RPS19/KDELR1/RPL18A/GBF1/RPL28/RPL19/RPS13/RPS12/SSR3/SPCS1/RTN4/RAB3GAP1/RPL22/RPS25/RAB3GAP2/RPL5/RPL23/SPCS3/RPL27/RPS15A/UBAC2/KDELR2/RPL35/RPS6/RPLP1/RPS24/SRP14/PMM2/RPS2/RPS11/RPL13A/RPL11/RPS8/SRP9/RPS27A/RPL32/SRPRB/RPL37/RPL10/SEC16A/RPS3/SRP19/RPL30/RER1/RPL8/RPL…	96
GO:0006605	GO:0006605	protein targeting	206/4092	432/17320	1.98396e-28	1.23958e-25	9.51467e-26	M6PR/LAMP2/SEC62/RPS20/BID/AGPS/ZDHHC6/TOMM34/HSPA5/USP36/SEC61A1/RPL18/AP3D1/TRAM2/SEC61A2/TRAM1/CSNK2A2/RPL31/SREBF1/UBE2D1/LMAN1/RAB7A/HSP90AA1/RPS5/ZFAND6/HUWE1/RPL6/RPLP0/SH3GLB1/TOMM22/FBXO7/RPL3/MIEF1/AP4S1/VTI1B/CHMP4B/LONP2/MON1B/ZDHHC2/BNIP3L/NUCB1/SGTA/RPS16/AKT2/RPS19/CDC37/RPL18A/GSK3A/RPL28/RPL19/GOSR2/YWHAE/UBE2D3/GRPEL1/FBXW7/HSPA8/RPS13/GNPTAB/RPS12/ERBIN/SSR3/SPCS1/SCP2/ICMT/RPL…	206
GO:0019080	GO:0019080	viral gene expression	118/4092	195/17320	2.29969e-28	1.30622e-25	1.00262e-25	RPS20/PTBP1/RSF1/NDC1/RPL18/NUCKS1/RPL31/CCNT2/RPS5/REST/SEH1L/RPL6/RPLP0/NUP50/POLR2E/EIF3L/RPL3/EIF3D/EP300/NELFCD/POLR2C/MON1B/RPS16/RPS19/RPL18A/EIF3B/TRIM14/EIF3A/RPL28/RPL19/NUP88/RPS13/NUP98/RPS12/NUP155/SPCS1/RPL22/HDAC1/RPS25/TRIM32/NUP43/TARDBP/ZNF639/RPL5/NUP153/GTF2F1/RPL23/ZFP36/EIF2AK4/SPCS3/CCNT1/RPL27/RPS15A/CDK9/RPL35/RPS6/RPLP1/RPS24/NUP54/NUP58/FURIN/RPS2/IFITM3/RPS11/RPL13A/RP…	118
GO:1903311	GO:1903311	regulation of mRNA metabolic process	172/4092	344/17320	7.10193e-27	3.65247e-24	2.80353e-24	PTBP1/PSMA4/PTCD2/THRAP3/PUM2/RC3H2/YBX3/U2AF2/YBX1/ELAVL1/PSME4/PABPC1/DAZAP1/IGF2BP2/RBM7/XPO1/TNPO1/DIS3/YTHDC1/REST/KHSRP/PAPOLA/PCBP4/PABPC4/TNRC6A/ALKBH5/HNRNPC/PSMD5/SRPK1/PSMD8/DDX17/GTPBP1/RBFOX2/TNRC6B/RBM23/PSMB5/APEX1/PABPN1/PSMA6/PSMA7/PSMD10/RBM3/PSMD7/HNRNPL/ZC3HAV1/HSPB1/PSMA2/PSMD3/C1QBP/DDX5/PSMD11/HSPA8/PRPF19/NUP98/CPSF6/SRSF9/MAPK14/SRSF3/QKI/TENT5A/TENT4A/FAM172A/FXR1/NCBP2/…	172
GO:0006614	GO:0006614	SRP-dependent cotranslational protein targeting to membrane	72/4092	95/17320	7.59957e-27	3.65247e-24	2.80353e-24	RPS20/SEC61A1/RPL18/TRAM2/SEC61A2/TRAM1/RPL31/RPS5/RPL6/RPLP0/RPL3/RPS16/RPS19/RPL18A/RPL28/RPL19/RPS13/RPS12/SSR3/RPL22/RPS25/RPL5/RPL23/RPL27/RPS15A/RPL35/RPS6/RPLP1/RPS24/SRP14/RPS2/RPS11/RPL13A/RPL11/RPS8/SRP9/RPS27A/RPL32/RPL37/RPL10/RPS3/SRP19/RPL30/RPL8/RPL26/RPL29/RPL9/RPS14/RPL27A/RPL13/SRP68/RPSA/RPL38/RPL4/RPL15/SRP72/RPLP2/RPS17/RPL35A/SRPRA/RPS23/RPL14/RPL37A/RPL12/RPS4X/RPL23A/RPL10…	72
GO:0010498	GO:0010498	proteasomal protein catabolic process	218/4092	480/17320	2.11424e-26	9.43556e-24	7.24247e-24	GCLC/CDC27/RHBDD2/FBXL3/HFE/RNF14/WWTR1/PIAS1/RNF19A/GABARAPL2/CUL3/PSMA4/HSPA5/JKAMP/HERPUD1/CUL1/RNF4/ATXN3/PSME4/ERLEC1/SEL1L/PRKACA/UBE2D1/CHFR/FBXW11/DERL2/KLHL20/UBE2A/ARAF/UBE2K/PPP2R5C/ITCH/SENP1/PSEN1/PCNP/NFE2L1/GSK3B/XPO1/HUWE1/KLHL42/MAEA/RFFL/CDC23/PSMD5/WAC/HSP90AB1/SIRT1/PSMD8/DESI1/PSMB5/PSMA6/PSMA7/GID8/TRIB3/USP14/PSMD10/TBL1X/PSMD7/FBXO31/STUB1/BFAR/UBE2W/UBXN8/PPP2CB/SGTA/DMAC…	218
GO:0019083	GO:0019083	viral transcription	107/4092	178/17320	1.66512e-25	6.9358e-23	5.32372e-23	RPS20/RSF1/NDC1/RPL18/NUCKS1/RPL31/CCNT2/RPS5/REST/SEH1L/RPL6/RPLP0/NUP50/POLR2E/RPL3/EP300/NELFCD/POLR2C/MON1B/RPS16/RPS19/RPL18A/TRIM14/RPL28/RPL19/NUP88/RPS13/NUP98/RPS12/NUP155/RPL22/HDAC1/RPS25/TRIM32/NUP43/TARDBP/ZNF639/RPL5/NUP153/GTF2F1/RPL23/ZFP36/CCNT1/RPL27/RPS15A/CDK9/RPL35/RPS6/RPLP1/RPS24/NUP54/NUP58/RPS2/IFITM3/RPS11/RPL13A/RPL11/RPS8/RPS27A/POLR2D/RPL32/RPL37/RPL10/POLR2K/RPS3/HMG…	107
GO:0006417	GO:0006417	regulation of translation	176/4092	364/17320	2.60833e-25	9.61846e-23	7.38286e-23	PTBP1/MATR3/EIF2AK2/PUM2/YBX3/EIF4B/YBX1/ELAVL1/PKM/RHOA/PABPC1/IGF2BP2/EIF4G3/PUM3/GEMIN5/EIF2AK1/OGFOD1/KHSRP/AARS1/TNRC6A/AGO1/MKNK2/MAPK1/POLDIP3/EIF3D/TNRC6B/EIF5/RBM3/DNAJC3/GSPT1/EIF3E/HNRNPL/AKT2/MTPN/HSPB1/EIF3B/EIF4H/LARP4B/CASC3/RPS6KB1/C1QBP/EIF4G2/GAPDH/QKI/MRPS27/CNOT6/FXR1/NCBP2/EIF1B/EIF4G1/NCL/NSUN4/FOXO3/PTBP3/ETF1/PAIP2/SERP1/TARDBP/ZNF706/KHDRBS1/RPL5/ACO1/AGO2/SOX4/CNOT1/HNRN…	176
GO:0034248	GO:0034248	regulation of cellular amide metabolic process	196/4092	422/17320	2.61706e-25	9.61846e-23	7.38286e-23	PTBP1/MATR3/IFNGR1/EIF2AK2/PUM2/YBX3/EIF4B/YBX1/ELAVL1/TNFRSF1A/PKM/RHOA/PDK3/PABPC1/IGF2BP2/PICALM/EIF4G3/TIGAR/PUM3/GEMIN5/EIF2AK1/OGFOD1/KHSRP/PDPR/AARS1/TNRC6A/AGO1/MKNK2/MAPK1/POLDIP3/EIF3D/TNRC6B/EIF5/RBM3/DNAJC3/GSPT1/EIF3E/HNRNPL/AKT2/GSK3A/MTPN/HSPB1/EIF3B/EIF4H/LARP4B/CASC3/RPS6KB1/C1QBP/EIF4G2/GAPDH/QKI/MRPS27/CNOT6/FXR1/NCBP2/EIF1B/EIF4G1/NCL/NFE2L2/NSUN4/FOXO3/PTBP3/ETF1/PAIP2/SERP1/…	196
GO:0008380	GO:0008380	RNA splicing	203/4092	445/17320	5.98364e-25	2.07699e-22	1.59424e-22	GCFC2/PTBP1/STRAP/THRAP3/CCAR1/U2AF2/SPEN/CDK13/YBX1/ELAVL1/PABPC1/DAZAP1/CLNS1A/RBM7/GEMIN5/YTHDC1/REST/WBP11/CHERP/RBM22/RTRAF/SF3B2/KHSRP/PAPOLA/PCBP4/HNRNPC/SRPK1/POLR2E/SF3A1/SNRPD3/TFIP11/SNU13/DDX17/THOC5/RBFOX2/PHF5A/RBM23/PRMT5/ACIN1/PABPN1/PNN/CSTF1/CRNKL1/RBM3/POLR2C/USB1/ESRP1/HNRNPL/SF3A2/HNRNPUL1/PPP2R1A/RBM28/SETX/CASC3/C1QBP/DDX5/PPP1R9B/DHX15/HSPA8/DCPS/PRPF19/RPS13/NUP98/SRSF9/S…	203
GO:0043161	GO:0043161	proteasome-mediated ubiquitin-dependent protein catabolic process	194/4092	421/17320	1.52233e-24	5.00605e-22	3.8425e-22	GCLC/CDC27/RHBDD2/FBXL3/HFE/RNF14/WWTR1/PIAS1/RNF19A/CUL3/PSMA4/HSPA5/JKAMP/HERPUD1/CUL1/RNF4/ATXN3/PSME4/SEL1L/UBE2D1/CHFR/FBXW11/DERL2/KLHL20/UBE2A/ARAF/UBE2K/PPP2R5C/ITCH/SENP1/PSEN1/PCNP/GSK3B/XPO1/HUWE1/KLHL42/MAEA/RFFL/CDC23/PSMD5/WAC/HSP90AB1/SIRT1/PSMD8/DESI1/PSMB5/PSMA6/PSMA7/GID8/TRIB3/USP14/PSMD10/TBL1X/PSMD7/FBXO31/STUB1/BFAR/UBE2W/UBXN8/PPP2CB/SGTA/DMAC2/GSK3A/CAV1/PSMA2/ERLIN1/FBXL2…	194
GO:0006612	GO:0006612	protein targeting to membrane	112/4092	199/17320	2.71542e-23	8.48296e-21	6.51128e-21	SEC62/RPS20/ZDHHC6/HSPA5/SEC61A1/RPL18/TRAM2/SEC61A2/TRAM1/RPL31/RPS5/RPL6/RPLP0/RPL3/MIEF1/CHMP4B/ZDHHC2/SGTA/RPS16/AKT2/RPS19/RPL18A/RPL28/RPL19/RPS13/RPS12/SSR3/ICMT/RPL22/RPS25/RPL5/VAMP7/SSR1/RPL23/RPL27/RPS15A/ZDHHC4/RPL35/RPS6/SDCBP/RPLP1/RPS24/VPS37B/SRP14/RPS2/ERBB2/RPS11/RPL13A/RPL11/RPS8/SRP9/RPS27A/RPL32/ATG3/RPL37/RPL10/GOLGA7/STOM/PARD3/RPS3/SRP19/ZDHHC7/RABGEF1/VPS37A/RPL30/DMTN/RP…	112
GO:0022613	GO:0022613	ribonucleoprotein complex biogenesis	195/4092	435/17320	6.83783e-23	2.03442e-20	1.56156e-20	GCFC2/STRAP/USP36/EIF4B/THUMPD1/RRP15/CLNS1A/XRCC5/HSP90AA1/GEMIN5/XPO1/DIS3/RPS5/YTHDC1/WBP11/RRN3/DIMT1/DDX18/XRN2/RPL6/RPLP0/AGO1/SRPK1/HSP90AB1/SF3A1/SNRPD3/EIF3L/SNU13/DDX17/RPL3/EIF3D/PRMT5/EIF5/CRNKL1/NOP56/PIN4/EIF3J/EIF3E/ERI1/SF3A2/RPS16/RPS19/GTPBP10/EIF3B/EIF4H/SETX/EIF3A/GTPBP4/NUP88/C1QBP/PRPF19/PTGES3/CPSF6/KRR1/SRSF9/MDN1/SF3B1/CEBPZ/RPF1/ZNHIT6/NSUN4/UTP25/HEATR1/FCF1/RCL1/WDR55/…	195
GO:0000184	GO:0000184	nuclear-transcribed mRNA catabolic process, nonsense-mediated decay	79/4092	120/17320	8.79521e-23	2.49784e-20	1.91727e-20	RPS20/RPL18/PABPC1/RPL31/RPS5/RPL6/RPLP0/RPL3/GSPT1/EIF3E/RPS16/RPS19/PPP2R1A/RPL18A/RPL28/RPL19/CASC3/RPS13/RPS12/PPP2CA/NCBP2/EIF4G1/RPL22/SMG7/RPS25/ETF1/RPL5/RPL23/RPL27/RPS15A/RPL35/RPS6/RPLP1/RPS24/RPS2/EIF4A3/RPS11/RPL13A/RPL11/RPS8/RPS27A/RPL32/RPL37/RPL10/RPS3/RPL30/SMG1/RPL8/RPL26/RPL29/RPL9/RPS14/RPL27A/RPL13/RPSA/DCP2/RPL38/RPL4/RPL15/RPLP2/RPS17/RPL35A/RPS23/RPL14/PNRC2/RPL37A/RPL12/…	79
GO:0016236	GO:0016236	macroautophagy	151/4092	308/17320	1.21957e-22	3.31299e-20	2.54296e-20	POLDIP2/LAMP2/VTA1/RRAGD/IFT88/ATP6V0A1/GABARAPL2/USP36/ATG5/VMP1/GNAI3/VPS35/CSNK2A2/PRKACA/TSG101/RAB7A/TIGAR/SESN1/PSEN1/CHMP2B/ATG16L1/HUWE1/DYNLL1/SNX5/SPTLC1/WAC/SIRT1/SH3GLB1/SNAP29/TOMM22/ATP6V1D/SPTLC2/HIF1A/CSNK2A1/CHMP4B/PIM2/RIPK2/BNIP3L/CDC37/RHEB/PRKAG2/LAMTOR3/GAPDH/PRKAB1/ATP6V0E1/ATP6V1A/STAM2/CHMP3/RAB3GAP1/MFN2/RRAGC/LGALS8/ATP6V0B/RAB3GAP2/VPS4B/VPS26A/CAPNS1/BECN1/ATG14/SNX6/…	151
GO:0000375	GO:0000375	RNA splicing, via transesterification reactions	165/4092	352/17320	5.27079e-22	1.37216e-19	1.05323e-19	GCFC2/PTBP1/STRAP/THRAP3/CCAR1/U2AF2/SPEN/CDK13/YBX1/ELAVL1/PABPC1/DAZAP1/CLNS1A/RBM7/GEMIN5/YTHDC1/REST/WBP11/CHERP/RBM22/SF3B2/KHSRP/PAPOLA/PCBP4/HNRNPC/SRPK1/POLR2E/SF3A1/SNRPD3/TFIP11/SNU13/DDX17/RBFOX2/PHF5A/RBM23/PRMT5/PABPN1/PNN/CSTF1/CRNKL1/RBM3/POLR2C/HNRNPL/SF3A2/HNRNPUL1/SETX/CASC3/C1QBP/DDX5/DHX15/HSPA8/DCPS/PRPF19/NUP98/SRSF9/SRSF3/QKI/FAM172A/FXR1/NCBP2/NCL/SF3B1/SRSF7/SRSF11/PRDX6/…	165
GO:0000377	GO:0000377	RNA splicing, via transesterification reactions with bulged adenosine as nucleophile	163/4092	349/17320	1.50296e-21	3.61173e-19	2.77226e-19	GCFC2/PTBP1/STRAP/THRAP3/CCAR1/U2AF2/SPEN/CDK13/YBX1/ELAVL1/PABPC1/DAZAP1/CLNS1A/RBM7/GEMIN5/YTHDC1/REST/WBP11/CHERP/RBM22/SF3B2/PAPOLA/PCBP4/HNRNPC/SRPK1/POLR2E/SF3A1/SNRPD3/TFIP11/SNU13/DDX17/RBFOX2/PHF5A/RBM23/PRMT5/PABPN1/PNN/CSTF1/CRNKL1/RBM3/POLR2C/HNRNPL/SF3A2/HNRNPUL1/SETX/CASC3/C1QBP/DDX5/DHX15/HSPA8/DCPS/PRPF19/NUP98/SRSF9/SRSF3/QKI/FAM172A/FXR1/NCBP2/NCL/SF3B1/SRSF7/SRSF11/PRDX6/PTBP3/…	163
GO:0000398	GO:0000398	mRNA splicing, via spliceosome	163/4092	349/17320	1.50296e-21	3.61173e-19	2.77226e-19	GCFC2/PTBP1/STRAP/THRAP3/CCAR1/U2AF2/SPEN/CDK13/YBX1/ELAVL1/PABPC1/DAZAP1/CLNS1A/RBM7/GEMIN5/YTHDC1/REST/WBP11/CHERP/RBM22/SF3B2/PAPOLA/PCBP4/HNRNPC/SRPK1/POLR2E/SF3A1/SNRPD3/TFIP11/SNU13/DDX17/RBFOX2/PHF5A/RBM23/PRMT5/PABPN1/PNN/CSTF1/CRNKL1/RBM3/POLR2C/HNRNPL/SF3A2/HNRNPUL1/SETX/CASC3/C1QBP/DDX5/DHX15/HSPA8/DCPS/PRPF19/NUP98/SRSF9/SRSF3/QKI/FAM172A/FXR1/NCBP2/NCL/SF3B1/SRSF7/SRSF11/PRDX6/PTBP3/…	163
GO:0051169	GO:0051169	nuclear transport	163/4092	355/17320	1.30422e-20	3.01807e-18	2.31658e-18	KPNA6/CDH1/PPP1R12A/ZC3H11A/NDC1/U2AF2/TNPO3/IPO5/ELAVL1/PRKACA/PSEN1/GEMIN5/GSK3B/XPO1/TNPO1/YTHDC1/SEH1L/RBM22/MAVS/RBM27/ALKBH5/NUP50/HSP90AB1/RAB18/SNRPD3/MAPK1/POLDIP3/THOC5/DESI1/PPM1A/PABPN1/FERMT1/NXT2/KPNA3/NUTF2/UBR5/TGFB1/TNPO2/PIK3R2/LZTS2/CASC3/KPNB1/NUP88/YWHAE/HTATIP2/NUP98/DUSP16/CPSF6/SRSF9/MAPK14/SRSF3/E2F3/HSPA9/NUP155/KPNA1/NCBP2/SRSF7/PARK7/SMG7/SRSF11/NUP43/FAM53C/TARDBP/KHD…	163
GO:0006913	GO:0006913	nucleocytoplasmic transport	160/4092	352/17320	1.01554e-19	2.26611e-17	1.7394e-17	KPNA6/CDH1/PPP1R12A/ZC3H11A/NDC1/U2AF2/TNPO3/IPO5/ELAVL1/PRKACA/PSEN1/GEMIN5/GSK3B/XPO1/TNPO1/YTHDC1/SEH1L/RBM22/MAVS/RBM27/ALKBH5/NUP50/HSP90AB1/RAB18/SNRPD3/MAPK1/POLDIP3/THOC5/DESI1/PPM1A/PABPN1/FERMT1/NXT2/KPNA3/NUTF2/UBR5/TGFB1/TNPO2/PIK3R2/LZTS2/CASC3/KPNB1/NUP88/YWHAE/HTATIP2/NUP98/DUSP16/CPSF6/SRSF9/MAPK14/SRSF3/E2F3/HSPA9/NUP155/KPNA1/NCBP2/SRSF7/PARK7/SMG7/SRSF11/NUP43/FAM53C/TARDBP/KHD…	160
GO:0031647	GO:0031647	regulation of protein stability	137/4092	288/17320	3.48475e-19	7.50783e-17	5.7628e-17	CREBBP/FBXL3/LAMP2/ZNF207/WIZ/CUL3/USP36/VPS35/ATP1B3/PFN2/SEL1L/SREBF1/CHFR/FBXW11/HSP90AA1/MUL1/CMTM6/HSP90AB1/SIRT1/SH3GLB1/MAPK1/XBP1/FBXO7/EP300/STK4/TBL1X/PIM2/STUB1/STK3/CDC37/BAG1/GTPBP4/PFN1/FBXW7/HSPA8/CD81/PTGES3/CREBL2/GAPDH/BAG2/PDCD10/RTN4/CCT4/AAK1/SUMO1/PARK7/UTP25/UBE2B/TCP1/TARDBP/RPL5/USP9X/CDKN1A/SOX4/RPL23/ID1/NR1D1/HIP1/DAD1/GNL3L/FLOT2/ZBED3/KRAS/VHL/NAPG/CDC73/MDM2/MARCHF7…	137
GO:0006403	GO:0006403	RNA localization	116/4092	234/17320	3.60293e-18	7.50369e-16	5.75962e-16	ZC3H11A/NDC1/U2AF2/YBX1/IGF2BP2/NCBP3/XPO1/YTHDC1/SEH1L/RTRAF/KHSRP/RBM27/ALKBH5/NUP50/POLDIP3/THOC5/YY1/PABPN1/NXT2/NUTF2/CASC3/NUP88/NUP98/PARP11/CPSF6/SRSF9/SRSF3/MRPL18/QKI/NUP155/NCBP2/CCT4/SRSF7/SMG7/SRSF11/ZNHIT6/NUP43/TCP1/KHDRBS1/FYTTD1/HNRNPA2B1/SRSF6/XPO5/NUP153/ZFP36/EXOSC2/DKC1/RAN/EIF5A/TERF2/SRRM1/HNRNPA1/IGF2BP3/SRSF1/WDR33/NUP54/G3BP2/NUP58/RBM26/EIF4A3/POLR2D/NAF1/CCT6A/CETN2/SI…	116
GO:0010506	GO:0010506	regulation of autophagy	153/4092	344/17320	7.77975e-18	1.568e-15	1.20355e-15	POLDIP2/PIK3C2A/RRAGD/IFT88/ATP6V0A1/TAB2/USP36/ATG5/GNAI3/VPS35/CSNK2A2/PRKACA/SREBF1/GPR137B/TIGAR/SESN1/GSK3B/ZMPSTE24/HUWE1/SNX5/SPTLC1/MUL1/WAC/SIRT1/ABL1/SH3GLB1/XBP1/FBXO7/EP300/ATP6V1D/SPTLC2/HIF1A/TRIB3/CHMP4B/PIM2/USP10/RIPK2/BNIP3L/CDC37/PIK3R2/GSK3A/NAMPT/MET/HSPB1/RHEB/PRKAG2/TRIM14/MTMR4/LAMTOR3/FBXW7/EIF4G2/CAMKK2/GAPDH/PRKAB1/ATP6V0E1/ATP6V1A/EIF4G1/RAB3GAP1/TMEM59/PARK7/MFN2/RRAG…	153
GO:1903829	GO:1903829	positive regulation of cellular protein localization	149/4092	335/17320	2.10047e-17	4.10117e-15	3.14795e-15	ITGA3/AP2B1/MARK4/BID/PRKCH/CDH1/RIPOR1/USP36/ATP2B4/IPO5/CSNK2A2/CDC42/PRKACA/TFRC/TSG101/DLG1/GPR137B/SAR1A/PSEN1/GSK3B/SSH1/RBM22/HUWE1/PPP1R13B/MAVS/EZR/HSP90AB1/SH3GLB1/ZDHHC8/MAPK1/MIEF1/PPM1A/TM9SF4/NUTF2/RAB11A/ZDHHC2/ZFAND1/UBR5/OAZ1/AKT2/TGFB1/PIK3R2/GSK3A/RAB11FIP2/PPP1R9B/YWHAE/UBE2D3/FBXW7/CD81/MAPK14/TMEM30A/TFDP2/PDCD10/SPTBN1/RTN4/CCT4/PARK7/MESD/TCP1/PLS1/TARDBP/ACSL3/GNAI1/YWHAH…	149
GO:0034976	GO:0034976	response to endoplasmic reticulum stress	133/4092	293/17320	1.49069e-16	2.82238e-14	2.16638e-14	RHBDD2/MBTPS2/EXTL3/HSPA5/JKAMP/HERPUD1/EIF2AK2/ATXN3/ERLEC1/SEL1L/DERL2/UBE2K/NFE2L1/GSK3B/BAX/ADD1/ERP29/SIRT1/KDELR3/XBP1/EP300/TRIB3/USP14/DNAJC3/STUB1/BFAR/UBXN8/PPP2CB/SGTA/PIK3R2/GSK3A/CAV1/FKBP14/ERLIN1/GOSR2/CCDC47/TMEM33/CCND1/UBE4A/LPCAT3/CERT1/FAF2/STC2/EIF4G1/GORASP2/NFE2L2/PARK7/EDEM3/TXNDC12/ATF6/SERP1/TNFRSF10B/TARDBP/TRIM25/VAPB/SSR1/CANX/ATF4/EIF2AK4/SESN2/SELENOS/SERINC3/EIF2S1…	133
GO:0032386	GO:0032386	regulation of intracellular transport	153/4092	356/17320	3.32008e-16	6.10114e-14	4.68306e-14	BID/EHD2/CDH1/RIPOR1/USP36/PPP1R12A/IPO5/ERLEC1/CSNK2A2/CDC42/PRKACA/SREBF1/DERL2/LMAN1/PTPN23/SAR1A/RAB21/PSEN1/GSK3B/XPO1/RBM22/HUWE1/MTMR2/PPP1R13B/MAVS/RBM27/EZR/HSP90AB1/SH3GLB1/MAPK1/MIEF1/PPM1A/FERMT1/TM9SF4/NUTF2/ZDHHC2/ZFAND1/UBR5/BNIP3L/NUCB1/OAZ1/AKT2/TGFB1/PIK3R2/GSK3A/YWHAE/UBE2D3/FBXW7/CD81/CPSF6/MAPK14/SNX3/TMEM30A/WWC1/TFDP2/PDCD10/NCBP2/CHMP3/SCP2/PARK7/DENND10/TARDBP/KHDRBS1/VAM…	153
GO:0042176	GO:0042176	regulation of protein catabolic process	165/4092	394/17320	4.18856e-16	7.47718e-14	5.73928e-14	GCLC/CYP51A1/MYCBP2/HFE/RNF14/PIAS1/RNF19A/GABARAPL2/TIMP2/CDH1/HERPUD1/HIPK2/ATXN3/ERLEC1/VPS35/PTPN3/CSNK2A2/PRKACA/CHFR/DERL2/NSF/RAB7A/ARAF/UBE2K/ITCH/SENP1/PSEN1/HSP90AA1/NFE2L1/GSK3B/XPO1/HUWE1/EZR/WAC/HSP90AB1/DESI1/TRIB3/CSNK2A1/CST3/USP14/PSMD10/STUB1/ZDHHC2/LAPTM4B/OAZ1/SGTA/GSK3A/CAV1/RIC1/RGP1/FBXL20/PSMD3/SMURF2/FBXW7/SH3D19/CD81/BAG2/SNX3/HMGCR/CSNK1A1/UBE3A/PSMD14/ODC1/SUMO1/NFE2L2…	165
GO:0043484	GO:0043484	regulation of RNA splicing	83/4092	155/17320	6.96703e-16	1.20917e-13	9.28122e-14	PTBP1/THRAP3/U2AF2/DAZAP1/RBM7/YTHDC1/REST/RBM22/PCBP4/SRPK1/DDX17/RBFOX2/RBM23/RBM3/ESRP1/HNRNPL/SETX/C1QBP/DDX5/HSPA8/PRPF19/RPS13/NUP98/SRSF9/SRSF3/QKI/FAM172A/FXR1/NCL/SRSF7/PRDX6/PTBP3/KHDRBS1/HNRNPA2B1/SMU1/SRSF6/HNRNPH2/METTL16/RBM39/KHDRBS3/GRSF1/RBM38/SLC38A2/SRPK2/HNRNPA1/SRSF1/TRA2B/C9orf78/TMBIM6/MBNL2/SF3B4/PIK3R1/WTAP/RBMX/CELF1/SAP18/MBNL1/HNRNPU/SREK1/DYRK1A/SON/RRP1B/SRSF2/TRA2A/…	83
GO:0031331	GO:0031331	positive regulation of cellular catabolic process	162/4092	388/17320	1.07836e-15	1.82096e-13	1.39772e-13	GCLC/PIK3C2A/RNF14/PIAS1/RNF19A/HERPUD1/ATG5/GNAI3/ATXN3/VPS35/PABPC1/CHFR/ITCH/SESN1/PSEN1/HSP90AA1/GSK3B/HUWE1/BAX/KHSRP/SPTLC1/MUL1/TNRC6A/EZR/WAC/SIRT1/SH3GLB1/FBXO7/GTPBP1/TNRC6B/SPTLC2/HIF1A/TRIB3/PSMD10/PIM2/STUB1/RIPK2/BNIP3L/SGTA/AKT2/CDC37/GSK3A/ZC3HAV1/CAV1/TRIM14/FBXW7/SH3D19/CD81/CAMKK2/BAG2/CSNK1A1/RAB3GAP1/SUMO1/NFE2L2/TMEM59/PARK7/MFN2/FBXL5/FOXO3/RAB3GAP2/TARDBP/AGO2/CNOT1/HNRNPR…	162
GO:0050821	GO:0050821	protein stabilization	92/4092	181/17320	1.45709e-15	2.39577e-13	1.83893e-13	LAMP2/ZNF207/WIZ/USP36/ATP1B3/PFN2/SEL1L/HSP90AA1/MUL1/HSP90AB1/EP300/STK4/TBL1X/PIM2/STK3/CDC37/BAG1/GTPBP4/PFN1/FBXW7/PTGES3/CREBL2/GAPDH/BAG2/PDCD10/RTN4/CCT4/AAK1/SUMO1/PARK7/UBE2B/TCP1/RPL5/USP9X/CDKN1A/SOX4/RPL23/HIP1/FLOT2/ZBED3/VHL/NAPG/MARCHF7/STXBP1/TP53/RPL11/ATP1B1/HSPD1/RABL3/PIK3R1/CCT6A/GOLGA7/SEC16A/CCT5/SAV1/BAG3/TBRG1/GNAQ/CCT8/BAG4/PINK1/DVL3/SYVN1/PEX19/MSX1/CCT3/NAA15/CAMLG/S…	92
GO:0050657	GO:0050657	nucleic acid transport	98/4092	198/17320	1.64631e-15	2.57154e-13	1.97384e-13	ZC3H11A/NDC1/U2AF2/YBX1/IGF2BP2/NCBP3/XPO1/YTHDC1/SEH1L/RTRAF/KHSRP/RBM27/ALKBH5/NUP50/POLDIP3/THOC5/PABPN1/NXT2/NUTF2/CASC3/NUP88/NUP98/PARP11/CPSF6/SRSF9/SRSF3/MRPL18/QKI/NUP155/NCBP2/SRSF7/SMG7/SRSF11/NUP43/KHDRBS1/FYTTD1/HNRNPA2B1/SRSF6/XPO5/NUP153/ZFP36/RAN/EIF5A/TERF2/SRRM1/HNRNPA1/IGF2BP3/SRSF1/WDR33/NUP54/G3BP2/NUP58/RBM26/EIF4A3/POLR2D/CETN2/SIDT2/EIF4E/HNRNPU/RANBP2/AHCTF1/SMG1/CHTOP/SR…	98
GO:0050658	GO:0050658	RNA transport	98/4092	198/17320	1.64631e-15	2.57154e-13	1.97384e-13	ZC3H11A/NDC1/U2AF2/YBX1/IGF2BP2/NCBP3/XPO1/YTHDC1/SEH1L/RTRAF/KHSRP/RBM27/ALKBH5/NUP50/POLDIP3/THOC5/PABPN1/NXT2/NUTF2/CASC3/NUP88/NUP98/PARP11/CPSF6/SRSF9/SRSF3/MRPL18/QKI/NUP155/NCBP2/SRSF7/SMG7/SRSF11/NUP43/KHDRBS1/FYTTD1/HNRNPA2B1/SRSF6/XPO5/NUP153/ZFP36/RAN/EIF5A/TERF2/SRRM1/HNRNPA1/IGF2BP3/SRSF1/WDR33/NUP54/G3BP2/NUP58/RBM26/EIF4A3/POLR2D/CETN2/SIDT2/EIF4E/HNRNPU/RANBP2/AHCTF1/SMG1/CHTOP/SR…	98
GO:0015931	GO:0015931	nucleobase-containing compound transport	119/4092	259/17320	1.97408e-15	3.0083e-13	2.30909e-13	SLC25A5/ZC3H11A/NDC1/U2AF2/YBX1/IGF2BP2/NCBP3/SLC35C2/XPO1/YTHDC1/SEH1L/RTRAF/KHSRP/RBM27/ALKBH5/NUP50/SLC25A1/POLDIP3/THOC5/PABPN1/NXT2/SLC35A2/NUTF2/CASC3/NUP88/NUP98/PARP11/CPSF6/SRSF9/SRSF3/MRPL18/QKI/SLC29A1/NUP155/SLC25A36/NCBP2/SRSF7/SMG7/SRSF11/SLC35A3/NUP43/SLC35B1/KHDRBS1/FYTTD1/HNRNPA2B1/SRSF6/XPO5/NUP153/SLC25A23/ZFP36/SLC35D2/RAN/EIF5A/TERF2/SRRM1/HNRNPA1/IGF2BP3/SRSF1/WDR33/SLC35A5/…	119
GO:0071826	GO:0071826	ribonucleoprotein complex subunit organization	97/4092	197/17320	3.50831e-15	5.21903e-13	4.00598e-13	GCFC2/STRAP/EIF4B/CLNS1A/XRCC5/HSP90AA1/GEMIN5/RPS5/YTHDC1/RPL6/RPLP0/AGO1/SRPK1/HSP90AB1/SF3A1/SNRPD3/TFIP11/EIF3L/SNU13/RPL3/EIF3D/PRMT5/EIF5/CRNKL1/EIF3J/ZFAND1/EIF3E/SF3A2/RPS19/EIF3B/EIF4H/SETX/EIF3A/PRPF19/PTGES3/CPSF6/SRSF9/MDN1/SF3B1/ZNHIT6/RPL5/AGO2/SRSF6/MRPS7/SNRPB/EIF2S2/AGO3/LSM4/EIF2S3/AAR2/TRAF7/KHDC4/CDC73/SRPK2/SRSF1/SCAF11/TXNL4A/RPL13A/RPL11/SNRNP200/POLR2D/NAF1/ABT1/LUC7L2/RBM…	97
GO:0051168	GO:0051168	nuclear export	99/4092	203/17320	4.0378e-15	5.86702e-13	4.50336e-13	ZC3H11A/NDC1/U2AF2/PRKACA/GSK3B/XPO1/YTHDC1/SEH1L/RBM22/RBM27/ALKBH5/NUP50/POLDIP3/THOC5/DESI1/PPM1A/PABPN1/NUTF2/TGFB1/LZTS2/CASC3/NUP88/YWHAE/NUP98/DUSP16/CPSF6/SRSF9/SRSF3/HSPA9/NUP155/NCBP2/SRSF7/PARK7/SMG7/SRSF11/NUP43/KHDRBS1/FYTTD1/HNRNPA2B1/SRSF6/CSE1L/XPO5/NUP153/XPO7/RAN/EIF5A/XPO4/SRRM1/HNRNPA1/MDM2/SRSF1/WDR33/TXN/ANP32B/NUP54/RITA1/NUP58/RBM26/TP53/EIF4A3/POLR2D/TCF7L2/EIF4E/BAG3/PTP…	99
GO:0006611	GO:0006611	protein export from nucleus	92/4092	184/17320	5.41304e-15	7.68652e-13	5.89996e-13	ZC3H11A/NDC1/U2AF2/PRKACA/GSK3B/XPO1/YTHDC1/SEH1L/RBM22/ALKBH5/NUP50/POLDIP3/THOC5/DESI1/PPM1A/PABPN1/NUTF2/TGFB1/CASC3/NUP88/YWHAE/NUP98/DUSP16/SRSF9/SRSF3/HSPA9/NUP155/NCBP2/SRSF7/PARK7/SMG7/SRSF11/NUP43/FYTTD1/HNRNPA2B1/SRSF6/CSE1L/XPO5/NUP153/XPO7/RAN/EIF5A/XPO4/SRRM1/MDM2/SRSF1/WDR33/TXN/ANP32B/NUP54/NUP58/TP53/EIF4A3/POLR2D/TCF7L2/EIF4E/BAG3/PTPN14/UHMK1/RANBP2/SMG1/CHTOP/SRSF2/SLBP/ABCE1/S…	92
GO:0051236	GO:0051236	establishment of RNA localization	98/4092	201/17320	5.66871e-15	7.87069e-13	6.04132e-13	ZC3H11A/NDC1/U2AF2/YBX1/IGF2BP2/NCBP3/XPO1/YTHDC1/SEH1L/RTRAF/KHSRP/RBM27/ALKBH5/NUP50/POLDIP3/THOC5/PABPN1/NXT2/NUTF2/CASC3/NUP88/NUP98/PARP11/CPSF6/SRSF9/SRSF3/MRPL18/QKI/NUP155/NCBP2/SRSF7/SMG7/SRSF11/NUP43/KHDRBS1/FYTTD1/HNRNPA2B1/SRSF6/XPO5/NUP153/ZFP36/RAN/EIF5A/TERF2/SRRM1/HNRNPA1/IGF2BP3/SRSF1/WDR33/NUP54/G3BP2/NUP58/RBM26/EIF4A3/POLR2D/CETN2/SIDT2/EIF4E/HNRNPU/RANBP2/AHCTF1/SMG1/CHTOP/SR…	98
GO:0000209	GO:0000209	protein polyubiquitination	143/4092	336/17320	8.19241e-15	1.11053e-12	8.52408e-13	CDC27/FBXL3/UBE3C/RNF14/RNF19A/CUL3/PSMA4/CUL1/RC3H2/RNF4/CBFB/PSME4/UBE2D1/CHFR/FBXW11/KLHL20/UBE2A/UBE2K/ITCH/NFE2L1/HUWE1/KLHL42/HECTD1/RFFL/CDC23/PSMD5/PSMD8/FBXO7/PSMB5/PSMA6/PSMA7/RNF125/PSMD10/XIAP/MGRN1/PSMD7/FBXO31/STUB1/BFAR/UBE2W/UBR5/PSMA2/TRIM14/UBE2R2/TNKS2/FBXL20/PSMD3/RNF167/PSMD11/SMURF2/UBE2D3/TRIM2/FBXW7/PRPF19/BIRC2/UBE4A/CBL/FBXL4/LNPEP/SKP1/UBE3A/PSMD14/FBXO30/FBXL5/UBE2B/TR…	143
GO:0050684	GO:0050684	regulation of mRNA processing	80/4092	152/17320	8.35383e-15	1.11053e-12	8.52408e-13	PTBP1/PTCD2/THRAP3/U2AF2/DAZAP1/RBM7/YTHDC1/REST/PAPOLA/PCBP4/SRPK1/DDX17/RBFOX2/RBM23/PABPN1/RBM3/HNRNPL/C1QBP/DDX5/HSPA8/PRPF19/NUP98/CPSF6/SRSF9/SRSF3/QKI/FAM172A/FXR1/NCBP2/NCL/SRSF7/PRDX6/PTBP3/KHDRBS1/HNRNPA2B1/SMU1/SRSF6/METTL16/CCNT1/RBM39/KHDRBS3/CDC73/SRPK2/HNRNPA1/SRSF1/TRA2B/CDK9/C9orf78/MBNL2/SF3B4/WTAP/RBMX/CELF1/CPSF7/SAP18/MBNL1/HNRNPU/SREK1/DYRK1A/SON/SRSF2/TRA2A/VIRMA/HNRNPK/NUD…	80
GO:0048193	GO:0048193	Golgi vesicle transport	154/4092	372/17320	1.3216e-14	1.72028e-12	1.32044e-12	RABEP1/GABARAPL2/CUL3/GOPC/VAMP3/TRAPPC3/AP3D1/KIF2A/EXOC5/NSF/LMAN1/KLHL20/DYNC1I2/CAPZB/SAR1A/DOP1A/RAB10/CD59/SCAMP1/TMED2/DYNLL1/GOLGA3/SNAP23/SEC22C/ARCN1/KDELR3/CNIH1/VTI1B/SEC23A/KIF3B/VAPA/GGA2/KDELR1/YKT6/SEC23IP/GBF1/GOSR2/GOSR1/AREG/PPP6R3/COPZ1/SNX3/GOLPH3/SEC24A/ERGIC1/TFG/SPTBN1/CAPZA1/SCAMP3/KLHL12/BLZF1/TMED5/RAB14/PPP6C/ARL1/LYPLA1/COPA/ACSL3/VAPB/ARFGEF2/VAMP7/BBS2/TBC1D20/COPB1…	154
GO:0002181	GO:0002181	cytoplasmic translation	60/4092	101/17320	1.3922e-14	1.7752e-12	1.36259e-12	YBX3/EIF4B/RPL18/ZC3H15/PKM/RPL31/RPL6/RPLP0/AARS1/EIF3L/EIF3D/EIF5/GSPT1/EIF3J/EIF3E/RPL18A/EIF3B/EIF4H/EIF3A/RPL19/EIF4G1/RPL22/ETF1/EIF2S2/EIF2S3/DPH2/RPLP1/RPL13A/RPL11/RPL32/EIF3H/DPH3/RPL30/EIF4A2/RPL8/ZNF385A/EIF4A1/RPL26/RPL29/RPL22L1/RPL9/EEF2/RPSA/CNBP/RPL38/RBM4/RPL15/EIF3F/EIF2S3B/RPL35A/DRG1/RPS23/YTHDF2/RPL10A/RPL39/RPS29/RPS28/RPL17/CPEB4/METTL3	60
GO:0022618	GO:0022618	ribonucleoprotein complex assembly	93/4092	190/17320	2.0581e-14	2.57181e-12	1.97405e-12	GCFC2/STRAP/EIF4B/CLNS1A/XRCC5/HSP90AA1/GEMIN5/RPS5/YTHDC1/RPL6/RPLP0/AGO1/SRPK1/HSP90AB1/SF3A1/SNRPD3/EIF3L/SNU13/RPL3/EIF3D/PRMT5/EIF5/CRNKL1/EIF3J/EIF3E/SF3A2/RPS19/EIF3B/EIF4H/SETX/EIF3A/PRPF19/PTGES3/CPSF6/SRSF9/MDN1/SF3B1/ZNHIT6/RPL5/AGO2/SRSF6/MRPS7/SNRPB/EIF2S2/AGO3/LSM4/EIF2S3/AAR2/TRAF7/KHDC4/CDC73/SRPK2/SRSF1/SCAF11/TXNL4A/RPL13A/RPL11/SNRNP200/POLR2D/NAF1/ABT1/LUC7L2/RBMX/RPL10/EIF3H/…	93
GO:0072331	GO:0072331	signal transduction by p53 class mediator	119/4092	266/17320	2.15069e-14	2.6348e-12	2.0224e-12	PHF20/CD44/RRM2B/TAF2/HIPK2/CSNK2A2/CNOT4/KAT6A/ZMPSTE24/RRN3/BAX/PPP1R13B/PCBP4/SUPT16H/RFFL/SIRT1/EP300/PRMT5/CSNK2A1/RBBP8/PSMD10/RBBP7/USP10/NBN/NDRG1/PPP1R13L/CASP2/TAF6/PRKAG2/DDX5/TMEM109/PRKAB1/MAPK14/PERP/CNOT6/TFDP2/ARID3A/HDAC1/PLAGL1/FOXO3/RPL5/CDKN1A/SOX4/CNOT1/RPL23/PRMT1/DYRK2/TAF4/SESN2/PRKAB2/PRKAA1/RPA1/RFC3/MDM2/HUS1/TTC5/MARCHF7/CNOT6L/PML/TAF4B/TP53/PMAIP1/AKT1/CARM1/RPL11/CN…	119
GO:0009896	GO:0009896	positive regulation of catabolic process	178/4092	451/17320	2.43411e-14	2.92467e-12	2.2449e-12	GCLC/PIK3C2A/RNF14/PIAS1/RNF19A/HERPUD1/ATG5/GNAI3/ATXN3/VPS35/PABPC1/CHFR/NSF/RAB7A/ITCH/SESN1/PSEN1/HSP90AA1/GSK3B/HUWE1/BAX/KHSRP/SPTLC1/MUL1/TNRC6A/EZR/WAC/SIRT1/SH3GLB1/FBXO7/GTPBP1/TNRC6B/SPTLC2/HIF1A/TRIB3/CSNK2A1/PSMD10/PIM2/STUB1/RIPK2/BNIP3L/OAZ1/SGTA/AKT2/CDC37/GSK3A/ZC3HAV1/CAV1/TRIM14/SMURF2/FBXW7/SH3D19/CD81/CAMKK2/BAG2/CSNK1A1/RAB3GAP1/SUMO1/NFE2L2/TMEM59/PARK7/MFN2/FBXL5/FOXO3/RAB…	178
GO:0061013	GO:0061013	regulation of mRNA catabolic process	99/4092	208/17320	2.89371e-14	3.41131e-12	2.61842e-12	PSMA4/THRAP3/PUM2/RC3H2/YBX3/YBX1/ELAVL1/PSME4/PABPC1/IGF2BP2/XPO1/TNPO1/DIS3/KHSRP/PCBP4/PABPC4/TNRC6A/ALKBH5/HNRNPC/PSMD5/PSMD8/GTPBP1/TNRC6B/PSMB5/APEX1/PSMA6/PSMA7/PSMD10/PSMD7/ZC3HAV1/HSPB1/PSMA2/PSMD3/PSMD11/HSPA8/MAPK14/TENT5A/TENT4A/FXR1/EIF4G1/PSMD14/SET/TARDBP/TENT4B/AGO2/CNOT1/PSMF1/HNRNPR/PSMB2/METTL16/ZFP36/PSMA1/EXOSC2/PSME3/ROCK2/PUM1/SYNCRIP/RC3H1/IGF2BP3/PSMB7/CNOT6L/ANP32A/FTO/T…	99
GO:0034504	GO:0034504	protein localization to nucleus	122/4092	276/17320	2.954e-14	3.41789e-12	2.62347e-12	KPNA6/CDH1/TNPO3/IPO5/ELAVL1/POLR1A/TFRC/PSEN1/GSK3B/XPO1/TNPO1/RBM22/MAVS/OSBPL8/NUP50/HSP90AB1/MAPK1/SIX4/FERMT1/NXT2/KPNA3/NUTF2/ARL2BP/UBR5/TGFB1/TNPO2/PIK3R2/DNAJB6/LZTS2/KPNB1/NUP88/YWHAE/NUP98/MAPK14/E2F3/SKP1/NUP155/KPNA1/CCT4/SUMO1/PARK7/SUPT7L/TCP1/FAM53C/TARDBP/CSE1L/CDKN1A/NUP153/BMP4/SOX9/MED1/RPL23/LIF/RPAIN/TRIM28/SESN2/DKC1/RAN/MDM2/GLUL/KAT7/TXN/NUP54/PPP3CA/NUP58/PML/TP53/AKT1/R…	122
GO:0048024	GO:0048024	regulation of mRNA splicing, via spliceosome	64/4092	113/17320	4.36389e-14	4.95738e-12	3.80514e-12	PTBP1/THRAP3/U2AF2/DAZAP1/RBM7/YTHDC1/REST/PCBP4/SRPK1/DDX17/RBFOX2/RBM23/RBM3/HNRNPL/C1QBP/DDX5/HSPA8/PRPF19/NUP98/SRSF9/SRSF3/QKI/FAM172A/FXR1/NCL/SRSF7/PRDX6/PTBP3/KHDRBS1/HNRNPA2B1/SMU1/SRSF6/METTL16/RBM39/KHDRBS3/SRPK2/HNRNPA1/SRSF1/TRA2B/C9orf78/MBNL2/SF3B4/WTAP/RBMX/CELF1/SAP18/MBNL1/HNRNPU/SREK1/DYRK1A/SON/SRSF2/TRA2A/HNRNPK/SF1/RBM4B/RBM4/ZBTB7A/SRSF10/RNPS1/RBMXL1/RBM15B/SRSF8/RBM8A	64
GO:0016241	GO:0016241	regulation of macroautophagy	87/4092	176/17320	6.89931e-14	7.69766e-12	5.90851e-12	POLDIP2/RRAGD/IFT88/ATP6V0A1/USP36/GNAI3/VPS35/PRKACA/TIGAR/SESN1/HUWE1/SNX5/SPTLC1/WAC/SIRT1/SH3GLB1/ATP6V1D/SPTLC2/HIF1A/CHMP4B/PIM2/RIPK2/BNIP3L/CDC37/RHEB/PRKAG2/LAMTOR3/GAPDH/PRKAB1/ATP6V0E1/ATP6V1A/RAB3GAP1/MFN2/RRAGC/ATP6V0B/RAB3GAP2/VPS26A/CAPNS1/SNX6/SESN2/ATP6V1E1/PRKAB2/PRKAA1/TBC1D14/UBQLN1/MAP3K7/CALCOCO2/TP53/RPTOR/AKT1/ATP6V1C2/RAB5A/RUBCN/ATP6V1B2/SESN3/LAMTOR1/FEZ1/PIP4K2A/BAG3/H…	87
GO:2001233	GO:2001233	regulation of apoptotic signaling pathway	161/4092	401/17320	7.79807e-14	8.46293e-12	6.49591e-12	GCLC/CFLAR/SLC25A5/TNFRSF12A/BID/FAS/CD44/BCLAF1/CTNNA1/RRM2B/HERPUD1/YBX3/GNAI3/CSNK2A2/ENO1/PSEN1/GSK3B/RRN3/DNAJA1/BAX/PPP1R13B/ERP29/MUL1/ITGA6/RFFL/SIRT1/XBP1/HIF1A/STK4/CSNK2A1/PSMD10/STK3/TNFRSF10A/URI1/PPP2R1A/GSK3A/CAV1/CASP2/HSPB1/TGFBR1/UNC5B/PPIF/YWHAE/SLC9A3R1/FBXW7/LTBR/TPD52L1/SOD2/TFDP2/GNAI2/ACVR1/BIRC6/NFE2L2/PARK7/HDAC1/IVNS1ABP/TXNDC12/TRIM32/TNFRSF10B/BCL2L14/BMP4/RBCK1/PLAGL…	161
GO:0033157	GO:0033157	regulation of intracellular protein transport	117/4092	264/17320	7.96917e-14	8.46293e-12	6.49591e-12	BID/CDH1/RIPOR1/USP36/IPO5/ERLEC1/CSNK2A2/CDC42/PRKACA/SREBF1/DERL2/LMAN1/SAR1A/PSEN1/GSK3B/XPO1/RBM22/HUWE1/PPP1R13B/MAVS/HSP90AB1/SH3GLB1/MAPK1/MIEF1/PPM1A/FERMT1/TM9SF4/NUTF2/ZDHHC2/ZFAND1/UBR5/BNIP3L/NUCB1/OAZ1/AKT2/TGFB1/PIK3R2/GSK3A/YWHAE/UBE2D3/FBXW7/CD81/MAPK14/SNX3/TMEM30A/TFDP2/PDCD10/PARK7/TARDBP/VAMP7/XPO5/BMP4/YWHAH/RAC2/TRIM28/RAN/PRKAA1/XPO4/YWHAQ/UBAC2/MDM2/NMT1/TXN/ANP32B/NUP54/N…	117
GO:0006986	GO:0006986	response to unfolded protein	89/4092	182/17320	7.99156e-14	8.46293e-12	6.49591e-12	RHBDD2/MBTPS2/EXTL3/HSPA5/JKAMP/HERPUD1/EIF2AK2/TM7SF3/DERL2/HSP90AA1/DNAJA1/BAX/ADD1/HSP90AB1/KDELR3/XBP1/EP300/DNAJC3/STUB1/BFAR/GSK3A/FKBP14/HSPB1/GOSR2/TMEM33/HSPA8/CCND1/HSPA9/FAF2/STC2/HSPE1/NFE2L2/EDEM3/MFN2/ATF6/HSPH1/SERP1/VAPB/SSR1/CANX/ATF4/SELENOS/DNAJB1/EIF2S1/DERL1/SEC31A/TMBIM6/HDGF/PDIA6/UBXN4/HSPD1/RHBDD1/SRPRB/PIK3R1/SERPINH1/HYOU1/BAG3/HSPB8/BCL2L11/HSPA13/TATDN2/PPP1R15B/AMFR/…	89
GO:0010256	GO:0010256	endomembrane system organization	178/4092	457/17320	1.00362e-13	1.0451e-11	8.02189e-12	BAIAP2L1/PAFAH1B1/VTA1/SYT7/EHD2/SEC61A1/VMP1/AP3D1/TRAM2/TRAM1/CDC42/MPP5/CLASP1/TSG101/LMAN1/RAB7A/CHMP2B/ZMPSTE24/RAB10/CHMP5/TMED2/HUWE1/SH3GLB1/RAB18/MAPK1/PACSIN2/MYH9/PRMT5/TRIP11/CHMP4B/ARHGEF7/RAB11A/LAPTM4B/RAB2A/NDRG1/SGTA/AKT2/PPP2R1A/RAB3A/CAV2/CAV1/WASL/SEC23IP/GBF1/ARHGAP21/CCDC47/SYNGR2/SLC9A3R1/TMEM33/CLCN3/CORO1C/PARP11/STX2/RAB5B/LPCAT3/SNX3/CERT1/GOLPH3/NUP155/PPP2CA/CSNK1A1/P…	178
GO:1903362	GO:1903362	regulation of cellular protein catabolic process	115/4092	259/17320	1.11017e-13	1.1371e-11	8.7281e-12	GCLC/HFE/RNF14/PIAS1/RNF19A/GABARAPL2/HERPUD1/HIPK2/ATXN3/ERLEC1/VPS35/CSNK2A2/PRKACA/CHFR/DERL2/ARAF/UBE2K/SENP1/PSEN1/HSP90AA1/NFE2L1/GSK3B/XPO1/EZR/WAC/HSP90AB1/DESI1/TRIB3/CSNK2A1/USP14/PSMD10/STUB1/LAPTM4B/SGTA/GSK3A/CAV1/RIC1/RGP1/FBXW7/CD81/BAG2/CSNK1A1/UBE3A/PSMD14/SUMO1/NFE2L2/PARK7/FBXL5/RAD23B/RPL5/RPL23/PSMF1/CBFA2T3/LDLR/LATS1/PSME3/UBAC2/UBQLN1/MDM2/NUDT15/MARCHF7/SDCBP/RDX/ATRAID/R…	115
GO:0042254	GO:0042254	ribosome biogenesis	129/4092	303/17320	1.64713e-13	1.65988e-11	1.27408e-11	USP36/THUMPD1/RRP15/XRCC5/XPO1/DIS3/RPS5/WBP11/RRN3/DIMT1/DDX18/XRN2/RPL6/RPLP0/SNU13/DDX17/RPL3/NOP56/PIN4/ERI1/RPS16/RPS19/GTPBP10/GTPBP4/NUP88/C1QBP/KRR1/MDN1/CEBPZ/RPF1/ZNHIT6/NSUN4/UTP25/HEATR1/FCF1/RCL1/WDR55/TENT4B/RPL5/MRM2/RRP36/MRPS7/SBDS/EMG1/METTL16/GNL3L/NSUN5/EXOSC2/DKC1/NOL11/RPL27/TRAF7/RAN/NIP7/WDR36/GLUL/PWP1/IMP4/TEX10/RPL35/RPS6/RPS24/WDR12/RPS2/UTP4/NOB1/EIF4A3/RPL11/RPS8/ISG…	129
GO:0016050	GO:0016050	vesicle organization	140/4092	338/17320	2.01827e-13	2.00161e-11	1.53638e-11	PAFAH1B1/VTA1/SYT7/CUL3/VAMP3/TRAPPC3/AP3D1/GNAI3/SYT1/PICALM/NSF/TSG101/LMAN1/RAB7A/SAR1A/CHMP2B/CD59/CHMP5/TMED2/SNAP23/SNAP29/CNIH1/VTI1B/SEC23A/CHMP4B/ASIP/VAPA/RAB11A/SPG11/BLOC1S6/ZDHHC2/LAPTM4B/ANKRD27/AKT2/RAB3A/CAV2/CAV1/WASL/SEC23IP/GBF1/GOSR2/GOSR1/AREG/CLCN3/PPP6R3/CORO1C/STX2/RAB5B/SNX3/GOLPH3/SEC24A/TFG/STAM2/CHMP3/SDC1/KLHL12/RAB14/PPP6C/VPS4B/RAB38/SDC4/VAPB/ARFGEF2/RAB22A/VAMP7/T…	140
GO:0017148	GO:0017148	negative regulation of translation	71/4092	135/17320	2.80241e-13	2.73585e-11	2.09996e-11	EIF2AK2/YBX1/IGF2BP2/EIF2AK1/KHSRP/TNRC6A/AGO1/TNRC6B/EIF3E/GAPDH/FXR1/EIF4G1/NCL/PAIP2/TARDBP/AGO2/CNOT1/HNRNPR/AGO3/METTL16/ZFP36/ATF4/EIF2AK4/ILF3/SESN2/RARA/EIF2S1/ROCK2/PUM1/SYNCRIP/CAPRIN1/RC3H1/EIF4E2/IGF2BP3/IREB2/EPRS1/CNOT6L/FTO/TOB1/EIF4A3/RPL13A/SRP9/CNOT9/EIF4EBP2/CELF1/RPS3/YTHDF1/EIF4E/ZFP36L2/LARP1/CNOT8/MALSU1/BTG2/STAT3/RNF139/ENC1/RBM4/SAMD4B/CALR/SHMT2/PURA/ZFP36L1/YTHDF3/YTHD…	71
GO:0043488	GO:0043488	regulation of mRNA stability	89/4092	186/17320	3.91789e-13	3.76599e-11	2.89067e-11	PSMA4/THRAP3/PUM2/RC3H2/YBX3/YBX1/ELAVL1/PSME4/PABPC1/IGF2BP2/XPO1/TNPO1/DIS3/KHSRP/PCBP4/PABPC4/ALKBH5/HNRNPC/PSMD5/PSMD8/PSMB5/APEX1/PSMA6/PSMA7/PSMD10/PSMD7/HSPB1/PSMA2/PSMD3/PSMD11/HSPA8/MAPK14/TENT5A/TENT4A/FXR1/EIF4G1/PSMD14/SET/TARDBP/TENT4B/PSMF1/HNRNPR/PSMB2/METTL16/ZFP36/PSMA1/EXOSC2/PSME3/ROCK2/PUM1/SYNCRIP/RC3H1/IGF2BP3/PSMB7/CNOT6L/ANP32A/FTO/AKT1/SERBP1/PSMA5/RPS27A/YTHDF1/TIRAP/UBC…	89
GO:0035966	GO:0035966	response to topologically incorrect protein	95/4092	204/17320	4.94173e-13	4.67817e-11	3.59083e-11	RHBDD2/MBTPS2/EXTL3/CUL3/HSPA5/JKAMP/HERPUD1/EIF2AK2/TM7SF3/ATXN3/DERL2/HSP90AA1/DNAJA1/BAX/ADD1/HSP90AB1/KDELR3/XBP1/EP300/DNAJC3/STUB1/BFAR/UBE2W/GSK3A/FKBP14/HSPB1/GOSR2/TMEM33/HSPA8/CCND1/HSPA9/FAF2/STC2/HSPE1/NFE2L2/EDEM3/MFN2/ATF6/HSPH1/SERP1/VAPB/SSR1/CANX/ATF4/SELENOS/DNAJB1/EIF2S1/DERL1/SEC31A/RNF185/TMBIM6/HDGF/PDIA6/UBXN4/HSPD1/RHBDD1/SRPRB/PIK3R1/SERPINH1/HYOU1/BAG3/HSPB8/BCL2L11/HSPA…	95
GO:0019058	GO:0019058	viral life cycle	138/4092	336/17320	6.43169e-13	5.99779e-11	4.60373e-11	VTA1/KPNA6/EIF2AK2/ATG5/NDC1/PKN2/NUCKS1/PABPC1/CDC42/TFRC/PVR/TSG101/HACD3/RAB7A/ITCH/XPO1/CHMP2B/SEH1L/ATG16L1/CHMP5/MAVS/CCNK/NUP50/SRPK1/HSP90AB1/CHMP4B/VAPA/KPNA3/SLC1A5/ZC3HAV1/CAV2/CAV1/TRIM14/KPNB1/NUP88/DDX5/HSPA8/DDX6/NECTIN1/CD81/NUP98/SNX3/NUP155/KPNA1/SPCS1/CHMP3/CD46/TRIM32/VPS4B/NUP43/TRIM25/ZNF639/WWP1/VAPB/STAU1/NUP153/DEK/TBC1D20/APOBEC3F/EIF2AK4/ILF3/LDLR/TRIM28/CHMP1A/TRIM5/RA…	138
GO:0016569	GO:0016569	covalent chromatin modification	182/4092	479/17320	7.30144e-13	6.70874e-11	5.14944e-11	CREBBP/KMT2E/KDM7A/JARID2/BAZ1B/PHF20/ZZZ3/JADE2/RSF1/USP36/KMT2C/ATG5/ATXN3/SREBF1/BAZ2A/UBE2A/RIF1/SRCAP/KAT6A/ZMPSTE24/REST/MECOM/HUWE1/ATXN7L3/KDM2B/RCOR1/WAC/SIRT1/SETD1A/TTLL12/EP300/PRMT5/BRMS1L/TBL1X/CTCF/SETD6/UBR5/TAF6/NSD2/KMT5B/PRDM4/SUDS3/PHC1/ZNF451/VEGFA/SKP1/KANSL3/ATF2/PARK7/HDAC1/ASH1L/RLF/KDM5B/RBBP5/DR1/KMT2A/UBE2B/SET/SUPT7L/HELLS/KANSL1/KDM3B/NAA50/NAA60/MORF4L2/NCOA3/USP22/…	182
GO:0006997	GO:0006997	nucleus organization	69/4092	132/17320	8.87087e-13	8.03264e-11	6.16563e-11	PAFAH1B1/GOPC/USP36/NDC1/HIPK2/PSME4/NFE2L1/CHMP2B/ZMPSTE24/SEH1L/RRN3/CHMP5/SRPK1/CHMP4B/RPS19/PPP2R1A/NUP98/PARP11/NUP155/PPP2CA/RTN4/SUMO1/NEK6/VPS4B/TARDBP/NUP153/POLR1B/EMG1/CHMP1A/H3-3B/VPS4A/USPL1/GOLM1/SRPK2/NUP54/PML/SERBP1/TOR1AIP1/CHMP7/AHCTF1/MFSD14A/LMNA/PYGO2/ATXN7/SUN1/REEP3/NOLC1/NDEL1/TMEM170A/SF1/USP50/TMEM43/AGFG1/UBXN2A/LEMD3/BANF1/CTDNEP1/ANKLE2/PITPNB/WBP2NL/FAM118B/SYCP1/UB…	69
GO:2001242	GO:2001242	regulation of intrinsic apoptotic signaling pathway	79/4092	160/17320	1.04136e-12	9.29485e-11	7.13447e-11	BID/CD44/BCLAF1/RRM2B/HERPUD1/YBX3/ENO1/RRN3/DNAJA1/BAX/ERP29/SIRT1/XBP1/HIF1A/URI1/CAV1/HSPB1/PPIF/SLC9A3R1/FBXW7/SOD2/NFE2L2/PARK7/HDAC1/IVNS1ABP/TXNDC12/TRIM32/PLAGL2/BECN1/SELENOS/SERINC3/TPT1/UBQLN1/MDM2/MARCHF7/TMBIM6/TP53/PMAIP1/SOD1/AKT1/RPL11/MCL1/PARP1/NONO/NACC2/RPS3/HYOU1/BCL2L11/PINK1/CCAR2/ZNF385A/RPL26/SYVN1/MSX1/HNRNPK/DDIAS/VDAC2/BAG5/UBB/TRIAP1/BCL2L1/RAD9A/PTPN2/GRINA/PRKRA/PTT…	79
GO:0043487	GO:0043487	regulation of RNA stability	91/4092	195/17320	1.31096e-12	1.15364e-10	8.85505e-11	PSMA4/THRAP3/PUM2/RC3H2/YBX3/YBX1/ELAVL1/PSME4/PABPC1/IGF2BP2/XPO1/TNPO1/DIS3/KHSRP/PCBP4/PABPC4/ALKBH5/HNRNPC/PSMD5/PSMD8/PSMB5/APEX1/PSMA6/PSMA7/PSMD10/PSMD7/HSPB1/PSMA2/PSMD3/PSMD11/HSPA8/MAPK14/TENT5A/TENT4A/FXR1/EIF4G1/PSMD14/SET/TARDBP/TENT4B/PSMF1/HNRNPR/PSMB2/METTL16/ZFP36/PSMA1/EXOSC2/DKC1/PSME3/ROCK2/PUM1/SYNCRIP/RC3H1/IGF2BP3/PSMB7/CNOT6L/ANP32A/FTO/AKT1/SERBP1/PSMA5/RPS27A/NAF1/YTHDF1…	91
GO:0032388	GO:0032388	positive regulation of intracellular transport	100/4092	222/17320	1.5302e-12	1.32787e-10	1.01924e-10	BID/EHD2/CDH1/RIPOR1/USP36/IPO5/CSNK2A2/CDC42/PRKACA/PTPN23/SAR1A/RAB21/PSEN1/GSK3B/RBM22/HUWE1/MTMR2/PPP1R13B/MAVS/RBM27/EZR/HSP90AB1/SH3GLB1/MAPK1/MIEF1/PPM1A/TM9SF4/NUTF2/ZDHHC2/ZFAND1/UBR5/OAZ1/AKT2/TGFB1/PIK3R2/GSK3A/YWHAE/UBE2D3/FBXW7/CD81/CPSF6/MAPK14/TMEM30A/TFDP2/PDCD10/NCBP2/SCP2/TARDBP/KHDRBS1/TBC1D20/YWHAH/RAC2/TRIM28/RAN/PRKAA1/XPO4/YWHAQ/MDM2/NMT1/ANP32B/RDX/RBM26/TP53/PMAIP1/ERBB2/…	100
GO:0032984	GO:0032984	protein-containing complex disassembly	135/4092	330/17320	1.61999e-12	1.38653e-10	1.06426e-10	LAMP2/VTA1/GABARAPL2/MRPS10/LIMA1/MRPL43/MRPS35/SMARCD1/KIF2A/LRP6/WDR1/SMARCE1/NSF/CLASP1/TSG101/CAPZB/GSK3B/CHMP2B/ZMPSTE24/CHMP5/OGFOD1/ADD1/SUPT16H/SNAP29/TFIP11/MID1/GSPT1/ZFAND1/GRWD1/MTPN/CAV1/SETX/PPP1R9B/HSPA8/MTRF1L/MRPL18/MRPS30/MRPS27/CSNK1A1/MRPL3/SPTBN1/MRPL19/CHMP3/MRPL37/CAPZA1/STMN1/ARID1A/CAMSAP2/SET/VPS4B/ETF1/MRPS7/RPL23/DSTN/ATG14/CAMSAP1/CHMP1A/MRPS25/MRPL35/EIF5A/VPS4A/SWAP…	135
GO:1903320	GO:1903320	regulation of protein modification by small protein conjugation or removal	104/4092	237/17320	4.0179e-12	3.39241e-10	2.60392e-10	GCLC/MYCBP2/PIAS1/CUL3/DCUN1D1/HSPA5/HERPUD1/ATG5/U2AF2/RNF4/UBE2D1/CHFR/ITCH/PSEN1/HSP90AA1/DNAJA1/HUWE1/FKBP1A/MUL1/HSP90AB1/ABL1/TRIB3/PSMD10/XIAP/NDFIP2/STUB1/UBE2I/RIPK2/UBR5/GSK3A/CAV1/LIMK1/TGFBR1/GTPBP4/ZMIZ1/FBXW7/BIRC2/BAG2/SKP1/UBE3A/PARK7/IVNS1ABP/EGR1/RPL5/SOX4/RPL23/UBA2/TICAM1/GNL3L/NDFIP1/GPS2/UBQLN1/MARCHF7/TANK/CDK9/DERL1/ARRB1/RAB1A/HMG20A/ARRDC4/RPS2/ARRB2/AKT1/SAE1/RPL11/BCL1…	104
GO:0051028	GO:0051028	mRNA transport	74/4092	150/17320	5.67635e-12	4.72877e-10	3.62967e-10	ZC3H11A/NDC1/U2AF2/IGF2BP2/NCBP3/XPO1/YTHDC1/SEH1L/KHSRP/ALKBH5/NUP50/POLDIP3/THOC5/PABPN1/NXT2/NUTF2/CASC3/NUP88/NUP98/PARP11/SRSF9/SRSF3/QKI/NUP155/NCBP2/SRSF7/SMG7/SRSF11/NUP43/FYTTD1/HNRNPA2B1/SRSF6/NUP153/ZFP36/EIF5A/SRRM1/HNRNPA1/IGF2BP3/SRSF1/WDR33/NUP54/G3BP2/NUP58/EIF4A3/POLR2D/CETN2/EIF4E/RANBP2/AHCTF1/SMG1/CHTOP/SRSF2/EIF5A2/SENP2/SLBP/SLU7/KIF5C/TNKS/AGFG1/SETD2/HSF1/ZFP36L1/BICD2/POM…	74
GO:0051098	GO:0051098	regulation of binding	144/4092	364/17320	6.05587e-12	4.97856e-10	3.8214e-10	HFE/RSF1/FOXC1/WAPL/HIPK2/BTBD1/NUCKS1/CDC42/PRKACA/MARK2/ACTB/PSEN1/GSK3B/ZMPSTE24/BAX/ADD1/FKBP1A/HSP90AB1/ABL1/TFIP11/EIF3D/EP300/STK4/ADNP/TRIB3/MAPRE1/PIM2/ARHGEF7/CLN5/STUB1/RIPK2/STK3/EIF3E/PPP2CB/HNRNPL/TLE5/MED25/TGFB1/CAV1/MET/TGFBR1/GTPBP4/DKK1/FBXW7/BAG2/GMNN/PPP2CA/CSNK1A1/EIF4G1/EPB41L5/ID2/SUMO1/PARK7/STMN1/CDKN1A/BMP4/GTF2F1/ID1/TICAM1/LIF/MAU2/GNL3L/TRIM28/RARA/PPARG/RAN/MEN1/EIF…	144
GO:0016570	GO:0016570	histone modification	175/4092	466/17320	6.44222e-12	5.2274e-10	4.01241e-10	CREBBP/KMT2E/KDM7A/JARID2/BAZ1B/PHF20/ZZZ3/JADE2/RSF1/USP36/KMT2C/ATG5/ATXN3/SREBF1/BAZ2A/UBE2A/RIF1/SRCAP/KAT6A/ZMPSTE24/REST/MECOM/HUWE1/ATXN7L3/KDM2B/RCOR1/WAC/SIRT1/SETD1A/TTLL12/EP300/PRMT5/BRMS1L/TBL1X/CTCF/SETD6/UBR5/TAF6/NSD2/KMT5B/PRDM4/SUDS3/PHC1/ZNF451/VEGFA/SKP1/KANSL3/ATF2/PARK7/HDAC1/ASH1L/RLF/KDM5B/RBBP5/DR1/KMT2A/UBE2B/SET/SUPT7L/KANSL1/KDM3B/NAA50/NAA60/MORF4L2/NCOA3/USP22/GTF3C4…	175
GO:0034620	GO:0034620	cellular response to unfolded protein	72/4092	145/17320	7.35769e-12	5.8937e-10	4.52384e-10	RHBDD2/MBTPS2/EXTL3/HSPA5/HERPUD1/EIF2AK2/TM7SF3/DERL2/BAX/ADD1/KDELR3/XBP1/EP300/DNAJC3/STUB1/BFAR/GSK3A/FKBP14/GOSR2/TMEM33/HSPA8/CCND1/HSPA9/STC2/NFE2L2/ATF6/SERP1/VAPB/SSR1/CANX/ATF4/SELENOS/EIF2S1/DERL1/SEC31A/TMBIM6/HDGF/PDIA6/HSPD1/RHBDD1/SRPRB/PIK3R1/HYOU1/BAG3/HSPB8/BCL2L11/HSPA13/TATDN2/PPP1R15B/AMFR/SHC1/LMNA/SYVN1/EXTL2/ATF3/CREBRF/VCP/TPP1/HSP90B1/CTDSP2/PTPN2/CALR/CREB3L2/SRPRA/HSF1…	72
GO:0006457	GO:0006457	protein folding	97/4092	218/17320	7.94772e-12	6.28574e-10	4.82476e-10	FKBP4/NUDCD3/HSPA5/DNAJC25/GNAI3/NFYC/DNAJA2/CSNK2A2/LMAN1/GNB1/HSP90AA1/DNAJA1/FKBP1A/ERP29/GANAB/FKBP5/HSP90AB1/ST13/AHSA1/CSNK2A1/DNAJC3/DNAJA3/SGTA/CDC37/DNAJB6/HSPB1/BAG1/PPIF/GRPEL1/HSPA8/CHORDC1/MLEC/PTGES3/BAG2/HSPA9/PFDN1/GNAI2/NKTR/CCT4/HSPE1/MESD/ATF6/RAD23B/TCP1/HSPH1/SIL1/MKKS/CANX/GNAI1/MPDU1/PRKCSH/DNAJB1/DERL1/PPIL1/DNAJA4/PDIA6/HSPD1/CCT6A/CCT5/SACS/BAG3/RANBP2/TBCEL/HSPA13/PDIA4…	97
GO:0051656	GO:0051656	establishment of organelle localization	163/4092	430/17320	1.4549e-11	1.13627e-09	8.72172e-10	PAFAH1B1/STARD3NL/CUL3/RIPOR1/MAP4/TRAPPC3/KIF1B/AP3D1/AP3M2/CDC42/FBXW11/NDE1/PICALM/NSF/CLASP1/LMAN1/DLG1/RAB7A/SAR1A/PSEN1/XPO1/CHMP2B/CD59/SEH1L/CHMP5/TMED2/TMEM230/SNAP23/EZR/CDC23/SNAP29/MYH9/CNIH1/HIF1A/TRIP11/SEC23A/KIF3B/CHMP4B/ASIP/RAB11A/SPG11/BLOC1S6/RAB3A/WASL/YKT6/SEC23IP/GBF1/ARHGAP21/BCCIP/KPNB1/GOSR2/NUP88/GOSR1/SLC9A3R1/AREG/PPP6R3/CBL/WASF1/SEC24A/PDCD10/TFG/TTL/ACTR3/CENPA/KLH…	163
GO:1903050	GO:1903050	regulation of proteolysis involved in cellular protein catabolic process	98/4092	224/17320	2.05582e-11	1.58578e-09	1.2172e-09	GCLC/HFE/RNF14/PIAS1/RNF19A/GABARAPL2/HERPUD1/HIPK2/ATXN3/ERLEC1/CSNK2A2/PRKACA/CHFR/DERL2/ARAF/UBE2K/SENP1/PSEN1/NFE2L1/GSK3B/XPO1/WAC/HSP90AB1/DESI1/TRIB3/CSNK2A1/USP14/PSMD10/STUB1/SGTA/GSK3A/CAV1/FBXW7/BAG2/CSNK1A1/UBE3A/PSMD14/SUMO1/NFE2L2/PARK7/RAD23B/RPL5/RPL23/PSMF1/CBFA2T3/LATS1/PSME3/UBAC2/UBQLN1/MDM2/NUDT15/MARCHF7/SDCBP/RNF185/TMTC3/PML/CSNK1D/AKT1/RPL11/PLK2/RNF217/GNA12/TLK2/PINK1/C…	98
GO:0035967	GO:0035967	cellular response to topologically incorrect protein	78/4092	165/17320	2.33914e-11	1.78231e-09	1.36805e-09	RHBDD2/MBTPS2/EXTL3/CUL3/HSPA5/HERPUD1/EIF2AK2/TM7SF3/ATXN3/DERL2/BAX/ADD1/KDELR3/XBP1/EP300/DNAJC3/STUB1/BFAR/UBE2W/GSK3A/FKBP14/GOSR2/TMEM33/HSPA8/CCND1/HSPA9/STC2/NFE2L2/ATF6/SERP1/VAPB/SSR1/CANX/ATF4/SELENOS/EIF2S1/DERL1/SEC31A/RNF185/TMBIM6/HDGF/PDIA6/HSPD1/RHBDD1/SRPRB/PIK3R1/HYOU1/BAG3/HSPB8/BCL2L11/HSPA13/TATDN2/PPP1R15B/AMFR/SHC1/LMNA/SYVN1/EXTL2/ATF3/DNAJB14/CREBRF/VCP/TPP1/HSP90B1/KLHL…	78
GO:0097193	GO:0097193	intrinsic apoptotic signaling pathway	117/4092	284/17320	2.89312e-11	2.17786e-09	1.67166e-09	BID/CD44/BCLAF1/CUL3/RRM2B/HERPUD1/CUL1/YBX3/HIPK2/TNFRSF1A/ENO1/UBE2K/RRN3/DNAJA1/BAX/PPP1R13B/ERP29/SIRT1/ABL1/XBP1/EP300/HIF1A/GSKIP/TRIB3/STK24/NBN/URI1/CAV1/CASP2/HSPB1/PPIF/DDX5/SLC9A3R1/FBXW7/TMEM109/SOD2/PERP/PDCD10/NFE2L2/PARK7/HDAC1/IVNS1ABP/TXNDC12/TRIM32/TNFRSF10B/CDKN1A/PLAGL2/BECN1/DYRK2/ATF4/SELENOS/SERINC3/TPT1/UBQLN1/MDM2/CIDEB/MARCHF7/TMBIM6/PML/TP53/PMAIP1/SOD1/AKT1/EPHA2/RPL11…	117
GO:0051650	GO:0051650	establishment of vesicle localization	93/4092	211/17320	4.04805e-11	3.01098e-09	2.31114e-09	PAFAH1B1/STARD3NL/CUL3/TRAPPC3/KIF1B/AP3D1/AP3M2/FBXW11/NDE1/PICALM/NSF/CLASP1/LMAN1/RAB7A/SAR1A/PSEN1/CD59/TMED2/TMEM230/SNAP23/SNAP29/CNIH1/TRIP11/SEC23A/KIF3B/ASIP/RAB11A/SPG11/BLOC1S6/RAB3A/WASL/YKT6/SEC23IP/GBF1/GOSR2/GOSR1/AREG/PPP6R3/SEC24A/TFG/KLHL12/MREG/PPP6C/VAMP7/BBS2/MKKS/TBC1D20/KIF1C/ACTN4/FNBP1L/RAB1A/AP1AR/SEC31A/USO1/SEC24B/CSNK1D/SNAPIN/ARF1/SHROOM2/SEC16A/SAR1B/AP3S2/PINK1/TRA…	93
GO:0072659	GO:0072659	protein localization to plasma membrane	115/4092	279/17320	4.10104e-11	3.01451e-09	2.31385e-09	ITGA3/EHD2/PRKCH/CDH1/GOPC/VAMP3/ATP2B4/PPP2R5A/TNFRSF1A/VPS35/ATP1B3/LRP6/EXOC5/MPP5/PICALM/NSF/ACTB/DLG1/RAB10/TMED2/EZR/ZDHHC8/VTI1B/SEC23A/GGA2/RAB11A/EHD4/ZDHHC2/AKT2/TGFB1/RAB3D/RAB3A/RAB11FIP2/TSPAN14/PPP1R9B/SLC9A3R1/CD81/GOLPH3/ASB3/SPTBN1/GORASP2/TMEM59/RAP1A/BLZF1/RHOQ/PLS1/LYPLA1/ACSL3/VAMP7/BBS2/RAP2A/EFR3A/FLOT2/VPS4A/NUMB/ROCK2/TMBIM1/STXBP1/RDX/PREPL/PDPK1/CLTC/AKT1/EPHA2/ATP1B1/P…	115
GO:2000058	GO:2000058	regulation of ubiquitin-dependent protein catabolic process	75/4092	158/17320	4.39788e-11	3.19511e-09	2.45247e-09	GCLC/HFE/RNF14/PIAS1/RNF19A/HERPUD1/HIPK2/CSNK2A2/CHFR/ARAF/UBE2K/SENP1/PSEN1/GSK3B/XPO1/WAC/HSP90AB1/DESI1/TRIB3/CSNK2A1/USP14/PSMD10/STUB1/SGTA/GSK3A/CAV1/FBXW7/CSNK1A1/UBE3A/SUMO1/NFE2L2/PARK7/RAD23B/RPL5/RPL23/CBFA2T3/LATS1/UBQLN1/MDM2/SDCBP/PML/CSNK1D/AKT1/RPL11/PLK2/RNF217/GNA12/TLK2/CCAR2/ZER1/UBQLN4/ZYG11B/RYBP/RCHY1/CAMLG/VCP/BAG5/ARIH1/FBXO22/PTK2/RNF139/PTEN/TRIB1/SMARCC1/FBXW8/ARIH2/S…	75
GO:0034249	GO:0034249	negative regulation of cellular amide metabolic process	73/4092	153/17320	5.88648e-11	4.22744e-09	3.24487e-09	EIF2AK2/YBX1/IGF2BP2/EIF2AK1/KHSRP/TNRC6A/AGO1/TNRC6B/EIF3E/GAPDH/FXR1/EIF4G1/NCL/PAIP2/TARDBP/AGO2/CNOT1/HNRNPR/AGO3/METTL16/ZFP36/ATF4/EIF2AK4/ILF3/SESN2/RARA/PRKAA1/EIF2S1/ROCK2/PUM1/SYNCRIP/CAPRIN1/RC3H1/EIF4E2/IGF2BP3/IREB2/EPRS1/CNOT6L/FTO/TOB1/EIF4A3/RPL13A/SRP9/CNOT9/EIF4EBP2/CELF1/RPS3/YTHDF1/EIF4E/ZFP36L2/LARP1/CNOT8/MALSU1/BTG2/STAT3/RNF139/ENC1/PRNP/RBM4/SAMD4B/CALR/SHMT2/PURA/ZFP36L1…	73
GO:0061136	GO:0061136	regulation of proteasomal protein catabolic process	86/4092	192/17320	7.88639e-11	5.59934e-09	4.2979e-09	GCLC/HFE/RNF14/PIAS1/RNF19A/GABARAPL2/HERPUD1/ATXN3/ERLEC1/PRKACA/CHFR/DERL2/ARAF/UBE2K/SENP1/PSEN1/NFE2L1/GSK3B/XPO1/WAC/HSP90AB1/DESI1/TRIB3/USP14/PSMD10/STUB1/SGTA/GSK3A/CAV1/FBXW7/BAG2/CSNK1A1/PSMD14/SUMO1/NFE2L2/PARK7/RAD23B/PSMF1/CBFA2T3/PSME3/UBAC2/UBQLN1/MDM2/NUDT15/MARCHF7/SDCBP/RNF185/TMTC3/CSNK1D/AKT1/RPL11/PLK2/RNF217/GNA12/TLK2/PINK1/CCAR2/ZER1/UBQLN4/PSMC2/ZYG11B/RYBP/RCHY1/CAMLG/VC…	86
GO:0031124	GO:0031124	mRNA 3'-end processing	54/4092	101/17320	8.47869e-11	5.95223e-09	4.56877e-09	ZC3H11A/U2AF2/PABPC1/PAPOLA/POLDIP3/THOC5/PABPN1/PABPC1L/CSTF1/RPRD1B/MTPAP/CASC3/CPSF6/SRSF9/SRSF3/NCBP2/SRSF7/SRSF11/TENT4B/SRSF6/CCNT1/GRSF1/SRRM1/CDC73/TUT4/SRSF1/WDR33/CDK9/RPRD1A/EIF4A3/APP/ZNF473/POLR2D/CPSF7/SSU72/CHTOP/SRSF2/RPRD2/SLBP/SLU7/VIRMA/NUDT21/AHCYL1/CSTF3/CSTF2T/HSF1/ZFP36L1/SUPT5H/CTR9/SARNP/RNPS1/SCAF8/RBM8A/CPSF2	54
GO:0009895	GO:0009895	negative regulation of catabolic process	126/4092	317/17320	8.7886e-11	6.10124e-09	4.68314e-09	CYP51A1/POLDIP2/MYCBP2/HFE/GABARAPL2/TIMP2/THRAP3/TAB2/USP36/ATP2B4/YBX3/HIPK2/YBX1/ELAVL1/ERLEC1/VPS35/PTPN3/PABPC1/CSNK2A2/DERL2/TIGAR/SENP1/PSEN1/MTMR2/HNRNPC/WAC/HSP90AB1/CSNK2A1/CHMP4B/CST3/USP14/LAPTM4B/SGTA/GSK3A/NAMPT/MET/RIC1/RGP1/EIF4G2/MAPK14/SNX3/TENT5A/TENT4A/HMGCR/EIF4G1/PARK7/SLIRP/TARDBP/TENT4B/RPL5/RPL23/PSMF1/METTL16/ZFP36/CBFA2T3/DKC1/PRKAA1/TBC1D14/UBAC2/SYNCRIP/MARCHF7/SDCBP/…	126
GO:0062197	GO:0062197	cellular response to chemical stress	134/4092	344/17320	1.14173e-10	7.83901e-09	6.01701e-09	WNT16/CFLAR/MGST1/GLRX2/FAS/FUT8/ATG5/YBX3/XRCC5/NFE2L1/REST/DNAJA1/PXN/SIRT1/ABL1/MAPK1/FBXO7/HIF1A/GSKIP/APEX1/CST3/ADNP2/STK24/GSR/CAV1/MET/HSPB1/SETX/PLEKHA1/PPIF/FBXW7/CAMKK2/STX2/SOD2/PDCD10/LANCL1/EPAS1/NFE2L2/ERRFI1/PARK7/SLC2A1/PRDX1/PRDX6/FOXO3/MAPKAP1/CHD6/STAU1/SLC25A23/ATF4/SESN2/SELENOS/PPARG/PRKAA1/KDM6B/EIF2S1/STK26/UBQLN1/ANXA1/MDM2/CAB39/TXN/KLF4/SLC12A6/PML/TP53/SIRT3/SOD1/AKT1…	134
GO:0034605	GO:0034605	cellular response to heat	61/4092	121/17320	1.30375e-10	8.8415e-09	6.78649e-09	FKBP4/CREBBP/NDC1/ATXN3/PRKACA/HSP90AA1/GSK3B/SEH1L/NUP50/HSP90AB1/SIRT1/MAPK1/EP300/RBBP7/STUB1/DNAJB6/BAG1/NUP88/YWHAE/HSPA8/CHORDC1/NUP98/PTGES3/BAG2/NUP155/SUMO1/NUP43/HSPH1/CDKN1A/NUP153/DNAJB1/RPA1/EIF2S1/NUP54/NUP58/RPTOR/POLR2D/HSPD1/CAMK2D/BAG3/HSPB8/RANBP2/BAG4/CCAR2/CLPB/SLU7/VCP/BAG5/ATP2A2/IRAK1/HSF1/MAPT/POM121/HDAC2/NF1/AKT1S1/NUP62/HSBP1/PDCD6/LYN/POM121C	61
GO:1901653	GO:1901653	cellular response to peptide	146/4092	384/17320	1.31604e-10	8.8415e-09	6.78649e-09	GCLC/CFLAR/BAIAP2L1/PIK3C2A/ATP6V0A1/ARID1B/PKM/NUCKS1/ATP2B1/PRKACA/SREBF1/PSEN1/GSK3B/RAB10/CHMP5/SNX5/PXN/OSBPL8/SIRT1/XBP1/ATP6V1D/APEX1/TRIB3/KLF5/ABCC1/RIPK2/SLC39A14/AKT2/PIK3R2/GSK3A/NAMPT/CAV2/CAV1/GRB10/KANK1/RPS6KB1/PPP1R9B/PRKAR1A/NFKB1/KLF3/ATP6V0E1/PRKAR2A/GNAI2/ATP6V1A/GRB14/STAT1/SOS1/NFE2L2/ERRFI1/RPE65/ATP6V0B/FOXO3/RHOQ/GOT1/ADCY7/NR4A1/NCOA5/RPL23/MAX/ID1/RAP1B/PPAT/SNX6/GDF15…	146
GO:0090316	GO:0090316	positive regulation of intracellular protein transport	82/4092	182/17320	1.51011e-10	9.99864e-09	7.67468e-09	BID/CDH1/RIPOR1/USP36/IPO5/CSNK2A2/CDC42/PRKACA/SAR1A/PSEN1/GSK3B/RBM22/HUWE1/PPP1R13B/MAVS/HSP90AB1/SH3GLB1/MAPK1/MIEF1/PPM1A/TM9SF4/NUTF2/ZDHHC2/ZFAND1/UBR5/OAZ1/AKT2/TGFB1/PIK3R2/GSK3A/YWHAE/UBE2D3/FBXW7/CD81/MAPK14/TMEM30A/TFDP2/PDCD10/TARDBP/YWHAH/RAC2/TRIM28/RAN/PRKAA1/XPO4/YWHAQ/MDM2/NMT1/ANP32B/TP53/PMAIP1/ERBB2/SAE1/PIK3R1/STOM/SEC16A/TCF7L2/BAG3/SAR1B/PINK1/ICE1/YWHAZ/YWHAB/SMAD3/MFF/YW…	82
GO:0010821	GO:0010821	regulation of mitochondrion organization	85/4092	191/17320	1.52028e-10	9.99864e-09	7.67468e-09	GCLC/SLC25A5/BID/ZDHHC6/USP36/VPS35/CSNK2A2/TFRC/SREBF1/LMAN1/TIGAR/GSK3B/DDHD2/HUWE1/BAX/PPP1R13B/MUL1/SH3GLB1/FBXO7/MIEF1/EP300/DDHD1/HIF1A/PSMD10/DHODH/BNIP3L/CDC37/GSK3A/PPIF/VAT1/YWHAE/UBE2D3/FBXW7/CAMKK2/GOLPH3/TFDP2/PARK7/MFN2/RHOT1/YWHAH/RAC2/PRKAA1/SPIRE1/YWHAQ/CIDEB/NMT1/ARRB2/TP53/PMAIP1/AKT1/SAE1/BAG3/BCL2L11/CYRIB/BAG4/PINK1/ATP13A2/HK2/LMNA/SQSTM1/YWHAZ/TMEM135/YWHAB/MFF/PRELID1/YWH…	85
GO:0032869	GO:0032869	cellular response to insulin stimulus	95/4092	222/17320	1.81975e-10	1.18435e-08	9.09076e-09	GCLC/CFLAR/BAIAP2L1/PIK3C2A/ATP6V0A1/PKM/NUCKS1/ATP2B1/SREBF1/GSK3B/RAB10/SNX5/OSBPL8/SIRT1/XBP1/ATP6V1D/TRIB3/SLC39A14/AKT2/PIK3R2/GSK3A/CAV2/GRB10/KANK1/RPS6KB1/ATP6V0E1/GNAI2/ATP6V1A/GRB14/STAT1/SOS1/ERRFI1/RPE65/ATP6V0B/FOXO3/RHOQ/GOT1/NCOA5/PPAT/ATP6V1E1/SELENOS/PPARG/PRKAA1/APC/CDK4/TBC1D4/EPRS1/USO1/IGF1R/PDPK1/AKT1/RAB13/PARP1/ATP6V1C2/PIK3R1/ATP6V1B2/EIF4EBP2/SESN3/SOGA1/FOXO1/FER/PDE3B/…	95
GO:1901990	GO:1901990	regulation of mitotic cell cycle phase transition	153/4092	409/17320	1.91115e-10	1.23102e-08	9.44894e-09	CDC27/KMT2E/PAFAH1B1/ZNF207/BID/CUL3/PSMA4/FOXN3/CUL1/PSME4/PRKACA/UBE2D1/NDE1/CLASP1/DYNC1I2/CNOT4/HSP90AA1/BAX/DYNLL1/PCBP4/CDC23/PSMD5/PSMD8/FBXO7/EP300/PSMB5/APEX1/PSMA6/PSMA7/CDC25B/MAPRE1/PSMD10/PSMD7/FBXO31/RAB11A/NBN/PPP2R1A/CDK6/CASP2/PSMA2/PSMD3/PSMD11/PPP1R9B/YWHAE/CCND1/CNOT6/SKP1/TFDP2/KLHL18/EIF4G1/PSMD14/ID2/ARID3A/ALMS1/PLAGL1/NEK6/VPS4B/CDKN1A/SOX4/CNOT1/PSMF1/PSMB2/PRMT1/PSMG2/P…	153
GO:0006888	GO:0006888	endoplasmic reticulum to Golgi vesicle-mediated transport	89/4092	204/17320	2.02852e-10	1.29328e-08	9.92689e-09	CUL3/GOPC/TRAPPC3/NSF/LMAN1/DYNC1I2/CAPZB/SAR1A/CD59/TMED2/DYNLL1/SEC22C/ARCN1/KDELR3/CNIH1/VTI1B/SEC23A/VAPA/KDELR1/YKT6/SEC23IP/GBF1/GOSR2/GOSR1/AREG/PPP6R3/COPZ1/SEC24A/ERGIC1/TFG/SPTBN1/CAPZA1/KLHL12/TMED5/PPP6C/COPA/VAPB/VAMP7/TBC1D20/COPB1/DCTN4/IER3IP1/TMED7/DYNC1LI2/KDELR2/STX17/RAB1A/ACTR1A/SEC31A/USO1/SEC24B/CSNK1D/ARF1/CNIH4/TEX261/YIPF5/SEC16A/HYOU1/VTI1A/SAR1B/TMED4/TRAPPC10/TGFA/COG…	89
GO:0070646	GO:0070646	protein modification by small protein removal	119/4092	298/17320	2.07351e-10	1.30861e-08	1.00445e-08	ZRANB1/PSMA4/USP36/ATXN3/RHOA/PSME4/UBE2D1/ACTB/ITCH/SENP1/ATXN7L3/PSMD5/PSMD8/JOSD1/EP300/DESI1/HIF1A/PSMB5/YY1/PSMA6/PSMA7/USP14/PSMD10/PSMD7/USP10/USP31/USP42/PSMA2/TGFBR1/PSMD3/PSMD11/SMURF2/USP46/BIRC2/COPS7A/SUDS3/SNX3/INO80D/STAM2/PSMD14/USP34/PARK7/SENP5/RAD23B/DESI2/USP22/USP9X/PSMF1/PSMB2/BECN1/RHOT1/PSMA1/NEDD8/TRAF3/PSME3/USPL1/APC/MAP3K7/MDM2/TANK/STAM/PSMB7/MYC/USP8/USP3/ARRB2/TP53/…	119
GO:0046822	GO:0046822	regulation of nucleocytoplasmic transport	57/4092	112/17320	3.25818e-10	2.03571e-08	1.56256e-08	CDH1/PPP1R12A/IPO5/PRKACA/PSEN1/GSK3B/XPO1/RBM22/MAVS/RBM27/HSP90AB1/MAPK1/PPM1A/FERMT1/NUTF2/UBR5/TGFB1/PIK3R2/YWHAE/CPSF6/MAPK14/NCBP2/PARK7/TARDBP/KHDRBS1/XPO5/NUP153/BMP4/TRIM28/RAN/XPO4/MDM2/TXN/ANP32B/NUP54/NUP58/RBM26/TP53/PIK3R1/TCF7L2/BAG3/PTPN14/UHMK1/NOLC1/SMAD3/PKIG/JUP/RBM4/PTPN11/SETD2/PPP1CC/CHP1/SIRT7/NF1/FLNA/NUP62/EMD	57
GO:0018205	GO:0018205	peptidyl-lysine modification	150/4092	402/17320	3.55148e-10	2.19699e-08	1.68635e-08	CREBBP/KMT2E/JARID2/PHF20/PIAS1/ZZZ3/JADE2/RSF1/KMT2C/ATG5/NDC1/RNF4/PIAS2/SENP1/RIF1/SRCAP/KAT6A/PLOD1/ZMPSTE24/MECOM/SEH1L/MUL1/NUP50/SIRT1/SETD1A/TTLL12/EP300/CTCF/SETD6/UBE2I/TAF6/ZMIZ1/NUP88/NSD2/KMT5B/NUP98/ZNF451/NUP155/KANSL3/ATF2/SUMO1/PARK7/ASH1L/RLF/RBBP5/DR1/KMT2A/SENP5/SET/SUPT7L/KANSL1/NUP43/EGR1/NAA50/NAA60/MORF4L2/NCOA3/USP22/SOX4/NUP153/GTF3C4/UBA2/LIF/CPA4/PHF10/GNL3L/TRIM28/DNM…	150
GO:0071375	GO:0071375	cellular response to peptide hormone stimulus	126/4092	323/17320	3.66988e-10	2.24798e-08	1.72549e-08	GCLC/CFLAR/BAIAP2L1/PIK3C2A/ATP6V0A1/ARID1B/PKM/NUCKS1/ATP2B1/PRKACA/SREBF1/GSK3B/RAB10/SNX5/PXN/OSBPL8/SIRT1/XBP1/ATP6V1D/APEX1/TRIB3/SLC39A14/AKT2/PIK3R2/GSK3A/CAV2/CAV1/GRB10/KANK1/RPS6KB1/PRKAR1A/NFKB1/ATP6V0E1/PRKAR2A/GNAI2/ATP6V1A/GRB14/STAT1/SOS1/NFE2L2/ERRFI1/RPE65/ATP6V0B/FOXO3/RHOQ/GOT1/ADCY7/NR4A1/NCOA5/MAX/RAP1B/PPAT/GDF15/ATP6V1E1/SELENOS/PPARG/PRKAA1/MEN1/ROCK2/APC/CDK4/MDM2/TBC1D4/…	126
GO:0000082	GO:0000082	G1/S transition of mitotic cell cycle	103/4092	251/17320	5.67392e-10	3.44181e-08	2.64184e-08	KMT2E/DBF4/BID/PIAS1/CUL3/CUL1/CDK17/CNOT4/BAX/PCBP4/FBXO7/EP300/APEX1/RBBP8/PIM2/CDK16/FBXO31/GSPT1/CDK6/CASP2/RPS6KB1/CCND1/E2F3/GMNN/CNOT6/TFDP2/EIF4G1/ACVR1/ID2/ORC4/ARID3A/PLAGL1/PPP6C/KHDRBS1/CDKN1A/SOX4/CNOT1/MAX/PRMT1/PPAT/LATS1/PSME3/RPA1/ANKRD17/CDC73/ANXA1/CDK4/ACVR1B/MDM2/KLF4/MYC/RDX/CNOT6L/PPP3CA/RB1/PML/TP53/RPTOR/BRD4/AKT1/CARM1/CTDSP1/CNOT9/CTDSPL/PLK2/EGFR/MEPCE/POLE3/NACC2/ITGB…	103
GO:0042326	GO:0042326	negative regulation of phosphorylation	162/4092	445/17320	5.97852e-10	3.59171e-08	2.7569e-08	DBNDD1/PAFAH1B1/RANBP9/GPRC5A/WWTR1/STRAP/WNK1/IPO5/PPP2R5A/RHOA/LRP6/TSG101/DLG1/TIGAR/ITCH/PSEN1/MECOM/DNAJA1/BAX/RTRAF/DYNLL1/EZR/SIRT1/ABL1/CRKL/FBXO7/GSKIP/TRIB3/PSMD10/DNAJC3/TGFB1/PPP2R1A/PIK3R2/CAV1/HSPB1/PRKAG2/FKTN/EIF3A/DKK1/PPIF/DUSP3/PRKAR1A/SLC9A3R1/CHORDC1/CBL/HIPK3/CORO1C/SH2B3/DUSP16/STK38/PPP2R5D/HMGCR/PPP2CA/PRKAR2A/EIF4G1/ERRFI1/PARK7/ASH1L/UBE2B/DUSP4/TARDBP/CDKN1A/BMP4/ATG14…	162
GO:0043543	GO:0043543	protein acylation	101/4092	245/17320	6.15369e-10	3.66174e-08	2.81065e-08	CREBBP/ZDHHC6/PHF20/ZZZ3/JADE2/RSF1/ATG5/SRCAP/GSK3B/KAT6A/ZMPSTE24/DLD/SIRT1/ZDHHC8/EP300/PPM1A/CTCF/ZDHHC2/TAF6/NAA25/ZNF451/KANSL3/ATF2/PARK7/DR1/KMT2A/SET/DLST/SUPT7L/KANSL1/NAA50/NAA60/MORF4L2/NCOA3/USP22/SOX4/GTF3C4/LIF/CPA4/PHF10/PRKAA1/WBP2/DPF2/CLOCK/MAP3K7/TAF5L/GLUL/EPC2/ZDHHC4/ABHD17C/NMT1/KAT7/ARRB1/NAA30/GLYR1/SMAD4/GOLGA7/POLE3/TAF5/FOXO1/ZDHHC7/ZDHHC5/KAT6B/PAXIP1/CTBP1/TAOK1/CRTC…	101
GO:0030968	GO:0030968	endoplasmic reticulum unfolded protein response	61/4092	125/17320	7.0243e-10	4.14036e-08	3.17803e-08	RHBDD2/MBTPS2/EXTL3/HSPA5/HERPUD1/EIF2AK2/DERL2/BAX/ADD1/KDELR3/XBP1/EP300/DNAJC3/STUB1/BFAR/GSK3A/FKBP14/GOSR2/TMEM33/CCND1/STC2/NFE2L2/ATF6/SERP1/VAPB/SSR1/CANX/ATF4/SELENOS/EIF2S1/DERL1/SEC31A/HDGF/PDIA6/SRPRB/PIK3R1/HYOU1/BCL2L11/TATDN2/PPP1R15B/AMFR/SHC1/LMNA/SYVN1/EXTL2/ATF3/CREBRF/VCP/TPP1/HSP90B1/CTDSP2/PTPN2/CALR/CREB3L2/SRPRA/PTPN1/ERO1A/GFPT1/RACK1/DNAJB9/ERN1	61
GO:0044843	GO:0044843	cell cycle G1/S phase transition	109/4092	271/17320	7.2507e-10	4.23387e-08	3.2498e-08	KMT2E/DBF4/BID/PIAS1/CUL3/CUL1/ATP2B4/CDK17/CNOT4/BAX/PCBP4/FBXO7/EP300/APEX1/RBBP8/PIM2/CDK16/FBXO31/GSPT1/CDK6/CASP2/RPS6KB1/FBXW7/CCND1/E2F3/GMNN/CNOT6/TFDP2/EIF4G1/ACVR1/ID2/ORC4/ARID3A/PLAGL1/PPP6C/KHDRBS1/CDKN1A/SOX4/CNOT1/MAX/PRMT1/PPAT/LATS1/PSME3/RPA1/ANKRD17/MEN1/CDC73/ANXA1/CDK4/ACVR1B/MDM2/KLF4/MYC/RDX/CNOT6L/PPP3CA/RB1/PML/TP53/RPTOR/BRD4/AKT1/CARM1/CTDSP1/CNOT9/CTDSPL/PLK2/EGFR/MEPC…	109
GO:0031330	GO:0031330	negative regulation of cellular catabolic process	105/4092	259/17320	8.76944e-10	5.07328e-08	3.89411e-08	POLDIP2/HFE/GABARAPL2/TIMP2/THRAP3/TAB2/USP36/ATP2B4/YBX3/HIPK2/YBX1/ELAVL1/ERLEC1/VPS35/PTPN3/PABPC1/CSNK2A2/DERL2/TIGAR/SENP1/PSEN1/MTMR2/HNRNPC/WAC/HSP90AB1/CSNK2A1/CHMP4B/CST3/USP14/LAPTM4B/SGTA/GSK3A/NAMPT/MET/RIC1/RGP1/EIF4G2/MAPK14/TENT5A/TENT4A/EIF4G1/PARK7/SLIRP/TARDBP/TENT4B/RPL5/RPL23/PSMF1/METTL16/ZFP36/DKC1/TBC1D14/UBAC2/SYNCRIP/MARCHF7/SDCBP/ATRAID/PML/FURIN/TOB1/TP53/FOXK2/AKT1/RPL…	105
GO:1901987	GO:1901987	regulation of cell cycle phase transition	161/4092	444/17320	9.40778e-10	5.39264e-08	4.13924e-08	CDC27/KMT2E/DBF4/PAFAH1B1/ZNF207/BID/CUL3/PSMA4/FOXN3/CUL1/ATP2B4/PSME4/PRKACA/UBE2D1/NDE1/CLASP1/DYNC1I2/CNOT4/HSP90AA1/BAX/DYNLL1/PCBP4/CDC23/PSMD5/PSMD8/FBXO7/EP300/PSMB5/APEX1/PSMA6/PSMA7/CDC25B/MAPRE1/PSMD10/PSMD7/FBXO31/RAB11A/NBN/PPP2R1A/CDK6/CASP2/PSMA2/PSMD3/PSMD11/PPP1R9B/YWHAE/FBXW7/CCND1/CNOT6/SKP1/TFDP2/KLHL18/EIF4G1/PSMD14/ID2/ARID3A/ALMS1/PLAGL1/NEK6/VPS4B/CDKN1A/SOX4/CNOT1/PSMF1/P…	161
GO:0006900	GO:0006900	vesicle budding from membrane	55/4092	109/17320	9.9998e-10	5.59476e-08	4.29438e-08	CUL3/TRAPPC3/AP3D1/PICALM/NSF/LMAN1/RAB7A/SAR1A/CD59/CHMP5/TMED2/CNIH1/SEC23A/CHMP4B/VAPA/WASL/SEC23IP/GBF1/GOSR2/AREG/PPP6R3/SNX3/GOLPH3/SEC24A/TFG/KLHL12/PPP6C/VAPB/TBC1D20/VPS4A/FNBP1L/RAB1A/SEC31A/USO1/SEC24B/CSNK1D/GOLPH3L/ARF1/CHMP7/SEC16A/SAR1B/TRAPPC10/AP2M1/TGFA/TRAPPC1/TMED10/RAB1B/SEC24C/MCFD2/TRAPPC6B/ANXA2/TMED9/TRAPPC4/PDCD6/SEC24D	55
GO:0043618	GO:0043618	regulation of transcription from RNA polymerase II promoter in response to stress	55/4092	109/17320	9.9998e-10	5.59476e-08	4.29438e-08	CREBBP/MBTPS2/PSMA4/HSPA5/PSME4/PSMD5/PSMD8/EP300/HIF1A/PSMB5/PSMA6/PSMA7/PSMD10/PSMD7/PSMA2/PSMD3/PSMD11/VEGFA/PSMD14/EPAS1/NFE2L2/ATF6/EGR1/CHD6/PSMF1/PSMB2/ATF4/PSMA1/SESN2/PSME3/DNAJB1/VHL/EGLN1/PSMB7/TMBIM6/TP53/PSMA5/ARNT/RPS27A/LIMD1/UBC/BAG3/ELOC/BACH1/PSMC2/ATF3/CITED2/HIF1AN/RBPJ/SIN3A/UBB/HSF1/PSMD12/UBA52/IMPACT	55
GO:0051648	GO:0051648	vesicle localization	95/4092	228/17320	1.01198e-09	5.59476e-08	4.29438e-08	PAFAH1B1/STARD3NL/CUL3/TRAPPC3/KIF1B/AP3D1/AP3M2/FBXW11/NDE1/PICALM/NSF/CLASP1/LMAN1/RAB7A/SAR1A/PSEN1/CD59/TMED2/TMEM230/SNAP23/SNAP29/CNIH1/TRIP11/SEC23A/KIF3B/ASIP/RAB11A/SPG11/BLOC1S6/RAB3A/WASL/YKT6/SEC23IP/GBF1/GOSR2/GOSR1/AREG/PPP6R3/SEC24A/TFG/KLHL12/MREG/PPP6C/VAMP7/BBS2/MKKS/TBC1D20/KIF1C/ACTN4/FNBP1L/RAB1A/AP1AR/SEC31A/USO1/SEC24B/CSNK1D/SNAPIN/ARF1/SHROOM2/SEC16A/SAR1B/AP3S2/PINK1/TRA…	95
GO:2001234	GO:2001234	negative regulation of apoptotic signaling pathway	95/4092	228/17320	1.01198e-09	5.59476e-08	4.29438e-08	GCLC/CFLAR/SLC25A5/BID/FAS/CD44/CTNNA1/RRM2B/HERPUD1/YBX3/GNAI3/CSNK2A2/ENO1/PSEN1/GSK3B/RRN3/DNAJA1/BAX/ITGA6/RFFL/SIRT1/XBP1/HIF1A/CSNK2A1/PSMD10/TNFRSF10A/URI1/HSPB1/TGFBR1/UNC5B/PPIF/SOD2/GNAI2/ACVR1/BIRC6/NFE2L2/PARK7/HDAC1/IVNS1ABP/TXNDC12/TRIM32/TNFRSF10B/BMP4/PSME3/SELENOS/RAF1/TPT1/MDM2/TMBIM1/MARCHF7/YAP1/TMBIM6/RB1/ARRB2/AKT1/MCL1/NONO/TCF7L2/HYOU1/NR4A2/SH3RF1/EYA3/PINK1/CCAR2/LMNA/ZN…	95
GO:1903313	GO:1903313	positive regulation of mRNA metabolic process	45/4092	82/17320	1.02081e-09	5.59476e-08	4.29438e-08	THRAP3/PABPC1/DAZAP1/KHSRP/TNRC6A/GTPBP1/TNRC6B/RBM3/ZC3HAV1/HSPA8/PRPF19/NUP98/NCBP2/NCL/PRDX6/TARDBP/AGO2/CNOT1/HNRNPR/METTL16/ZFP36/ROCK2/CDC73/PUM1/RC3H1/TRA2B/CNOT6L/FTO/TOB1/SF3B4/RBMX/YTHDF1/ZFP36L2/CNOT8/BTG2/TRA2A/NUDT21/HSF1/ZFP36L1/YTHDF3/YTHDF2/CNOT7/GIGYF2/RBMXL1/METTL3	45
GO:1901796	GO:1901796	regulation of signal transduction by p53 class mediator	79/4092	179/17320	1.07813e-09	5.85752e-08	4.49607e-08	PHF20/CD44/RRM2B/TAF2/HIPK2/CSNK2A2/KAT6A/ZMPSTE24/RRN3/PPP1R13B/SUPT16H/RFFL/SIRT1/EP300/PRMT5/CSNK2A1/RBBP8/PSMD10/RBBP7/NBN/PPP1R13L/TAF6/PRKAG2/DDX5/PRKAB1/MAPK14/HDAC1/RPL5/RPL23/DYRK2/TAF4/PRKAB2/PRKAA1/RPA1/RFC3/MDM2/HUS1/TTC5/MARCHF7/PML/TAF4B/TP53/PMAIP1/AKT1/RPL11/TAF5/SSRP1/JMY/RAD17/SETD9/DYRK1A/ZNF385A/RPL26/RBBP4/MSX1/HIPK1/MEAF6/TP53INP1/HNRNPK/WRN/TAF3/SPRED1/BRD7/TAF10/UBB/RNF34/…	79
GO:0043620	GO:0043620	regulation of DNA-templated transcription in response to stress	57/4092	115/17320	1.19548e-09	6.4391e-08	4.94247e-08	CREBBP/MBTPS2/BCLAF1/PSMA4/HSPA5/PSME4/PSMD5/PSMD8/EP300/HIF1A/PSMB5/PSMA6/PSMA7/PSMD10/PSMD7/PSMA2/PSMD3/PSMD11/VEGFA/PSMD14/EPAS1/NFE2L2/ATF6/EGR1/CHD6/PSMF1/PSMB2/ATF4/PSMA1/SESN2/PSME3/DNAJB1/VHL/EGLN1/PSMB7/TMBIM6/TP53/PSMA5/ARNT/RPS27A/LIMD1/UBC/BAG3/ELOC/BACH1/PSMC2/ATF3/CITED2/HIF1AN/RBPJ/SIN3A/UBB/RELA/HSF1/PSMD12/UBA52/IMPACT	57
GO:0051348	GO:0051348	negative regulation of transferase activity	111/4092	280/17320	1.37377e-09	7.33619e-08	5.63105e-08	DBNDD1/GPRC5A/WWTR1/WNK1/IPO5/PPP2R5A/LRP6/TSG101/PSEN1/GSK3B/DNAJA1/RTRAF/SIRT1/ABL1/FBXO7/GSKIP/TRIB3/DNAJC3/PPP2R1A/GSK3A/CAV1/HSPB1/PRKAG2/LIMK1/DUSP3/PRKAR1A/CHORDC1/CBL/HIPK3/CORO1C/SH2B3/DUSP16/STK38/BAG2/HMGCR/PPP2CA/PRKAR2A/ERRFI1/PARK7/DUSP4/RPL5/CDKN1A/BMP4/RPL23/PTPRB/ZFP36/AJUBA/SNX6/MLLT1/LATS1/PPARG/GPS2/MEN1/APC/TAOK3/DUSP5/DUSP6/RB1/WARS1/IGF1R/PDPK1/TP53/RPTOR/AKT1/RPL11/RUBCN/E…	111
GO:0030330	GO:0030330	DNA damage response, signal transduction by p53 class mediator	54/4092	107/17320	1.40455e-09	7.43696e-08	5.7084e-08	CD44/HIPK2/CNOT4/ZMPSTE24/BAX/PCBP4/SIRT1/EP300/PSMD10/USP10/NBN/NDRG1/CASP2/DDX5/CNOT6/TFDP2/ARID3A/PLAGL1/FOXO3/CDKN1A/SOX4/CNOT1/PRMT1/SESN2/MDM2/MARCHF7/CNOT6L/PML/TP53/PMAIP1/CARM1/CNOT9/PLK2/CNOT8/PAXIP1/DYRK1A/CNOT11/BTG2/ZNF385A/RPL26/MSX1/E2F7/SPRED1/PPM1D/TRIAP1/ACER2/PTTG1IP/RPS27L/TFDP1/SPRED2/MDM4/CNOT7/E2F4/MYO6	54
GO:0051099	GO:0051099	positive regulation of binding	77/4092	174/17320	1.50183e-09	7.88524e-08	6.05249e-08	HFE/FOXC1/WAPL/HIPK2/PSEN1/GSK3B/ADD1/FKBP1A/HSP90AB1/ABL1/EIF3D/EP300/STK4/TRIB3/MAPRE1/CLN5/RIPK2/STK3/EIF3E/PPP2CB/HNRNPL/MED25/TGFB1/CAV1/MET/GMNN/PPP2CA/EIF4G1/EPB41L5/PARK7/STMN1/BMP4/TICAM1/MAU2/TRIM28/RARA/PPARG/RAN/MEN1/EIF2S1/MBD2/CDK9/TXN/KLF4/NIBAN2/DERL1/ARRB1/RB1/APP/RPL11/PARP1/PLK2/HMBOX1/TCF7L2/CEBPG/DPH3/CLIC2/TIAM1/SPPL3/SKI/EPB41/AMFR/CALM3/PYGO2/NIPBL/B2M/CTNNB1/NMD3/CTBP2/BD…	77
GO:1900180	GO:1900180	regulation of protein localization to nucleus	61/4092	127/17320	1.55748e-09	8.10927e-08	6.22445e-08	CDH1/IPO5/POLR1A/TFRC/PSEN1/GSK3B/RBM22/MAVS/HSP90AB1/MAPK1/FERMT1/NUTF2/UBR5/TGFB1/PIK3R2/LZTS2/MAPK14/CCT4/PARK7/TCP1/TARDBP/BMP4/LIF/TRIM28/SESN2/DKC1/RAN/GLUL/KAT7/NUP54/NUP58/AKT1/PARP1/PIK3R1/CCT6A/MEPCE/MFHAS1/CCT5/BAG3/CCT8/ATP13A2/LMNA/CCT3/NOLC1/CCT2/SMAD3/PKIG/NMD3/SIN3A/TRIM8/JUP/SUMO3/NF2/CHP1/NF1/ILRUN/FLNA/SRC/CD2AP/NUP62/OTUD7B	61
GO:0032434	GO:0032434	regulation of proteasomal ubiquitin-dependent protein catabolic process	62/4092	130/17320	1.63718e-09	8.45383e-08	6.48892e-08	GCLC/HFE/RNF14/PIAS1/RNF19A/HERPUD1/CHFR/ARAF/UBE2K/SENP1/PSEN1/GSK3B/XPO1/WAC/HSP90AB1/DESI1/TRIB3/USP14/PSMD10/STUB1/SGTA/GSK3A/CAV1/CSNK1A1/SUMO1/NFE2L2/PARK7/RAD23B/CBFA2T3/UBQLN1/MDM2/SDCBP/CSNK1D/AKT1/RPL11/PLK2/RNF217/GNA12/TLK2/CCAR2/ZER1/UBQLN4/ZYG11B/RYBP/RCHY1/CAMLG/VCP/BAG5/ARIH1/FBXO22/TRIB1/SMARCC1/FBXW8/ARIH2/SOCS4/BCAP31/UBQLN2/SUMO2/STYX/RACK1/CSNK1E/TAF9	62
GO:0006903	GO:0006903	vesicle targeting	49/4092	94/17320	1.9623e-09	1.00495e-07	7.71374e-08	STARD3NL/CUL3/TRAPPC3/NSF/CLASP1/LMAN1/SAR1A/PSEN1/CD59/TMED2/SNAP23/SNAP29/CNIH1/TRIP11/SEC23A/YKT6/SEC23IP/GBF1/GOSR2/GOSR1/AREG/PPP6R3/SEC24A/TFG/KLHL12/PPP6C/TBC1D20/RAB1A/AP1AR/SEC31A/USO1/SEC24B/CSNK1D/SEC16A/SAR1B/TRAPPC10/TGFA/TRAPPC1/TMED10/RAB1B/FAM91A1/SEC24C/MCFD2/TRAPPC6B/TMED9/TRAPPC4/PDCD6/TBC1D23/SEC24D	49
GO:0031396	GO:0031396	regulation of protein ubiquitination	87/4092	206/17320	2.29832e-09	1.16747e-07	8.96117e-08	GCLC/MYCBP2/CUL3/DCUN1D1/HSPA5/HERPUD1/ATG5/U2AF2/UBE2D1/CHFR/PSEN1/HSP90AA1/DNAJA1/HUWE1/FKBP1A/HSP90AB1/ABL1/TRIB3/PSMD10/XIAP/NDFIP2/STUB1/RIPK2/UBR5/GSK3A/CAV1/LIMK1/TGFBR1/GTPBP4/FBXW7/BIRC2/BAG2/SKP1/UBE3A/PARK7/IVNS1ABP/RPL5/SOX4/RPL23/TICAM1/GNL3L/NDFIP1/GPS2/UBQLN1/MARCHF7/CDK9/DERL1/ARRB1/RAB1A/ARRDC4/RPS2/ARRB2/AKT1/RPL11/BCL10/SPOPL/RPS3/PAXIP1/RNF111/PINK1/SQSTM1/RCHY1/SENP2/CAMLG/BA…	87
GO:1905475	GO:1905475	regulation of protein localization to membrane	83/4092	194/17320	2.55115e-09	1.28545e-07	9.86674e-08	ITGA3/AP2B1/BID/PRKCH/GOPC/ATP2B4/GPC1/PPP2R5A/PICALM/ACTB/DLG1/SSH1/PPP1R13B/EZR/ZDHHC8/CRKL/MIEF1/VTI1B/RAB11A/ZDHHC2/AKT2/TGFB1/RAB11FIP2/PPP1R9B/YWHAE/CD81/TFDP2/SPTBN1/TMEM59/RAP1A/MESD/RHOQ/PLS1/LYPLA1/ACSL3/VAMP7/YWHAH/VPS4A/NUMB/YWHAQ/TMBIM1/NMT1/ADAM10/PDPK1/CLTC/TP53/PMAIP1/ERBB2/AKT1/EPHA2/PIK3R1/EGFR/STOM/ITGB1/SLC7A11/ZDHHC7/ZDHHC5/RER1/LDLRAP1/DMTN/SQSTM1/AP2M1/CNST/YWHAZ/ARF6/STX3/…	83
GO:0006405	GO:0006405	RNA export from nucleus	66/4092	143/17320	2.71468e-09	1.35691e-07	1.04152e-07	ZC3H11A/NDC1/U2AF2/XPO1/YTHDC1/SEH1L/RBM27/ALKBH5/NUP50/POLDIP3/THOC5/PABPN1/CASC3/NUP88/NUP98/CPSF6/SRSF9/SRSF3/NUP155/NCBP2/SRSF7/SMG7/SRSF11/NUP43/KHDRBS1/FYTTD1/HNRNPA2B1/SRSF6/XPO5/NUP153/RAN/EIF5A/SRRM1/HNRNPA1/SRSF1/WDR33/NUP54/NUP58/RBM26/EIF4A3/POLR2D/EIF4E/RANBP2/SMG1/CHTOP/SRSF2/SLBP/ABCE1/SLU7/NMD3/AGFG1/NPM1/SETD2/XPOT/POM121/NOP9/SDAD1/SARNP/RNPS1/NUP62/ZC3H11B/EIF6/RBM15B/RBM8A/POM…	66
GO:0051170	GO:0051170	import into nucleus	75/4092	170/17320	2.88197e-09	1.42909e-07	1.09693e-07	KPNA6/CDH1/TNPO3/IPO5/ELAVL1/PSEN1/GEMIN5/TNPO1/RBM22/MAVS/NUP50/HSP90AB1/RAB18/SNRPD3/MAPK1/FERMT1/NXT2/KPNA3/NUTF2/UBR5/TGFB1/TNPO2/PIK3R2/KPNB1/NUP88/HTATIP2/NUP98/MAPK14/E2F3/NUP155/KPNA1/FAM53C/TARDBP/CSE1L/CDKN1A/NUP153/BMP4/MED1/RPL23/SNRPB/RPAIN/TRIM28/RAN/HNRNPA1/NUP54/PPP3CA/NUP58/PML/TP53/AKT1/PIK3R1/BAG3/RANBP2/LMNA/NOLC1/SMAD3/SNRPD1/STAT3/PKIG/JUP/PRKAG1/KPNA2/PTTG1IP/RGPD2/KPNA4/CH…	75
GO:0006984	GO:0006984	ER-nucleus signaling pathway	32/4092	51/17320	2.92691e-09	1.43995e-07	1.10526e-07	MBTPS2/HSPA5/HERPUD1/SREBF1/GSK3B/XBP1/ERLIN1/CCDC47/TMEM33/FBXW7/SPRING1/LPCAT3/NFE2L2/ATF6/ATF4/SELENOS/EIF2S1/TP53/TMCO1/EIF2A/ERLIN2/ATG10/BCL2L11/PPP1R15B/AMFR/ATF3/HSP90B1/ATP2A2/PTPN2/CALR/PTPN1/SREBF2	32
GO:0006446	GO:0006446	regulation of translational initiation	43/4092	79/17320	3.35337e-09	1.62044e-07	1.2438e-07	EIF2AK2/EIF4B/EIF4G3/EIF2AK1/EIF5/DNAJC3/EIF3E/HSPB1/EIF3B/EIF4H/RPS6KB1/EIF4G2/NCBP2/EIF1B/EIF4G1/PAIP2/KHDRBS1/AGO2/ATF4/EIF2AK4/EIF2S1/RPL13A/POLR2D/EIF3H/EIF4EBP2/YTHDF1/CDC123/UHMK1/LARP1/EIF4A2/EIF5B/PPP1R15B/PPP1CA/EIF1/RBM4/NPM1/YTHDF3/RXRA/YTHDF2/DDX3X/IMPACT/METTL3/PAIP1	43
GO:1900034	GO:1900034	regulation of cellular response to heat	43/4092	79/17320	3.35337e-09	1.62044e-07	1.2438e-07	FKBP4/CREBBP/NDC1/HSP90AA1/GSK3B/SEH1L/NUP50/HSP90AB1/SIRT1/MAPK1/EP300/DNAJB6/BAG1/NUP88/YWHAE/HSPA8/CHORDC1/NUP98/PTGES3/BAG2/NUP155/NUP43/HSPH1/NUP153/DNAJB1/RPA1/NUP54/NUP58/RPTOR/CAMK2D/BAG3/HSPB8/RANBP2/BAG4/CCAR2/BAG5/HSF1/MAPT/POM121/AKT1S1/NUP62/HSBP1/POM121C	43
GO:0071453	GO:0071453	cellular response to oxygen levels	92/4092	223/17320	3.37159e-09	1.62044e-07	1.2438e-07	CFLAR/CREBBP/FAS/PSMA4/HIPK2/PDK3/PSME4/ENO1/TIGAR/GNB1/PSMD5/SIRT1/PSMD8/EP300/HIF1A/PSMB5/PSMA6/PSMA7/PSMD10/PGK1/PSMD7/STUB1/NDRG1/BNIP3L/NAMPT/CAV1/PSMA2/PSMD3/PSMD11/CBL/VEGFA/SLC29A1/STC2/ATP6V1A/PSMD14/EPAS1/NFE2L2/FOXO3/EGR1/PSMF1/PSMB2/HP1BP3/ATF4/PSMA1/AJUBA/PSME3/PPARG/PRKAA1/VHL/ROCK2/UBQLN1/MDM2/EGLN1/PSMB7/MYC/TMBIM6/TP53/PMAIP1/AKT1/PSMA5/ARNT/RPS27A/LIMD1/HYOU1/FOXO1/UBC/DDAH1/ELO…	92
GO:0034599	GO:0034599	cellular response to oxidative stress	114/4092	294/17320	3.75489e-09	1.79088e-07	1.37463e-07	WNT16/CFLAR/MGST1/GLRX2/FUT8/NFE2L1/REST/PXN/SIRT1/ABL1/MAPK1/FBXO7/HIF1A/GSKIP/APEX1/CST3/ADNP2/STK24/GSR/MET/HSPB1/SETX/PLEKHA1/PPIF/FBXW7/CAMKK2/STX2/SOD2/PDCD10/LANCL1/EPAS1/NFE2L2/PARK7/PRDX1/PRDX6/FOXO3/MAPKAP1/CHD6/STAU1/ATF4/SESN2/SELENOS/PRKAA1/KDM6B/EIF2S1/STK26/UBQLN1/ANXA1/MDM2/TXN/KLF4/PML/TP53/SIRT3/SOD1/AKT1/MCL1/ARNT/PARP1/PYCR2/RHOB/ARL6IP5/EGFR/NONO/SIGMAR1/RPS3/FOXO1/SLC7A11/FE…	114
GO:0048524	GO:0048524	positive regulation of viral process	53/4092	107/17320	4.65279e-09	2.19821e-07	1.68728e-07	KPNA6/RSF1/PKN2/NUCKS1/PABPC1/TSG101/HACD3/RAB7A/CHMP2B/SRPK1/POLR2E/EP300/NELFCD/CHMP4B/VAPA/POLR2C/CAV2/HSPA8/CHMP3/VPS4B/ZNF639/VAPB/STAU1/GTF2F1/TBC1D20/CCNT1/VPS4A/SRPK2/CDK9/VPS37B/POLR2D/POLR2K/STOM/CHD1/LARP1/RRP1B/ADAR/PPIB/CFL1/PDE12/TMEM39A/POLR2L/POLR2A/KPNA2/SP1/P4HB/SUPT5H/PPIA/IGF2R/CNOT7/SUPT4H1/DDX3X/PPIE	53
GO:0061418	GO:0061418	regulation of transcription from RNA polymerase II promoter in response to hypoxia	42/4092	77/17320	4.67929e-09	2.19821e-07	1.68728e-07	CREBBP/PSMA4/PSME4/PSMD5/PSMD8/EP300/HIF1A/PSMB5/PSMA6/PSMA7/PSMD10/PSMD7/PSMA2/PSMD3/PSMD11/VEGFA/PSMD14/EPAS1/NFE2L2/EGR1/PSMF1/PSMB2/PSMA1/PSME3/VHL/EGLN1/PSMB7/TP53/PSMA5/ARNT/RPS27A/LIMD1/UBC/ELOC/BACH1/PSMC2/CITED2/HIF1AN/RBPJ/UBB/PSMD12/UBA52	42
GO:1990778	GO:1990778	protein localization to cell periphery	127/4092	338/17320	4.85009e-09	2.26145e-07	1.73582e-07	ITGA3/EHD2/PRKCH/RABEP1/CDH1/GOPC/VAMP3/KIF1B/ATP2B4/PPP2R5A/TNFRSF1A/VPS35/ATP1B3/LRP6/EXOC5/MPP5/PICALM/NSF/ACTB/DLG1/RAB10/TMED2/EZR/ZDHHC8/VTI1B/SEC23A/GGA2/RAB11A/EHD4/ZDHHC2/AKT2/TGFB1/RAB3D/RAB3A/CAV1/RAB11FIP2/TSPAN14/PPP1R9B/SLC9A3R1/CD81/GOLPH3/ASB3/SPTBN1/GORASP2/TMEM59/RAP1A/BLZF1/RHOQ/PLS1/LYPLA1/ACSL3/VAMP7/BBS2/RAP2A/GNAI1/CLIP1/EFR3A/FLOT2/VPS4A/NUMB/ROCK2/TMBIM1/STXBP1/RDX/ADAM10…	127
GO:2001243	GO:2001243	negative regulation of intrinsic apoptotic signaling pathway	49/4092	96/17320	4.92894e-09	2.28118e-07	1.75097e-07	BID/CD44/RRM2B/HERPUD1/YBX3/ENO1/RRN3/DNAJA1/SIRT1/XBP1/HIF1A/URI1/HSPB1/PPIF/SOD2/NFE2L2/PARK7/HDAC1/IVNS1ABP/TXNDC12/TRIM32/SELENOS/TPT1/MDM2/MARCHF7/TMBIM6/AKT1/MCL1/NONO/HYOU1/PINK1/CCAR2/ZNF385A/SYVN1/DDIAS/VDAC2/BAG5/TRIAP1/BCL2L1/GRINA/PTTG1IP/TAF9B/NOC2L/PTPN1/SRC/DDX3X/MAGEA3/GPX1/TAF9	49
GO:0006364	GO:0006364	rRNA processing	91/4092	222/17320	5.99195e-09	2.75277e-07	2.11295e-07	USP36/THUMPD1/RRP15/DIS3/WBP11/DIMT1/DDX18/XRN2/SNU13/DDX17/NOP56/PIN4/ERI1/RPS16/RPS19/GTPBP4/KRR1/MDN1/RPF1/ZNHIT6/NSUN4/UTP25/HEATR1/FCF1/RCL1/WDR55/TENT4B/RPL5/MRM2/RRP36/SBDS/EMG1/METTL16/NSUN5/EXOSC2/DKC1/NOL11/RPL27/WDR36/IMP4/TEX10/RPL35/RPS6/RPS24/WDR12/RPS2/UTP4/NOB1/EIF4A3/RPL11/RPS8/ISG20L2/NAF1/ABT1/RPL7L1/UTP23/SRFBP1/NIFK/RRP1B/RPL26/NOL9/TFB2M/WDR43/UTP15/NSA2/RPS14/DDX21/NOLC1/PO…	91
GO:0043903	GO:0043903	regulation of symbiotic process	92/4092	226/17320	7.46315e-09	3.40363e-07	2.61253e-07	KPNA6/RSF1/EIF2AK2/PKN2/NUCKS1/PABPC1/TSG101/HACD3/RAB7A/CHMP2B/REST/MAVS/CCNK/SRPK1/POLR2E/EP300/NELFCD/CHMP4B/VAPA/POLR2C/ZC3HAV1/CAV2/CAV1/TRIM14/DDX5/HSPA8/GAPDH/SNX3/STAT1/CHMP3/HDAC1/TRIM32/VPS4B/TARDBP/TRIM25/ZNF639/VAPB/STAU1/GTF2F1/TBC1D20/ZFP36/APOBEC3F/EIF2AK4/CCNT1/ILF3/TRIM28/TRIM5/VPS4A/SRPK2/CDK9/VPS37B/PML/IFITM3/POLR2D/DYNLT1/POLR2K/STOM/HMGA2/BCL2L11/FBXL2/UBP1/CHD1/LARP1/RRP1B/…	92
GO:0016197	GO:0016197	endosomal transport	97/4092	242/17320	7.60345e-09	3.42083e-07	2.62574e-07	SPAG9/VTA1/EHD2/VAMP3/AP3D1/VPS35/PICALM/TSG101/RAB7A/PTPN23/ERC1/CHMP2B/RAB10/CHMP5/SNX5/CMTM6/VTI1B/CHMP4B/CLN5/RAB11A/EHD4/ZDHHC2/LAPTM4B/LEPROTL1/ANKRD27/YKT6/RIC1/RGP1/GBF1/GOSR2/GOSR1/CORO1C/RAB35/SNX3/STAM2/CHMP3/ALMS1/RAB14/VPS4B/DENND10/ARL1/VPS26A/EPS15L1/SNX6/SNX9/CHMP1A/TBC1D5/RBSN/TBC1D14/VPS4A/ARL8B/STX6/VPS36/STAM/PREPL/VPS37B/CLTC/TMEM50B/SNX27/RAB13/RPS27A/SNX12/CHMP7/LAMTOR1/UBC…	97
GO:0009408	GO:0009408	response to heat	71/4092	161/17320	7.70521e-09	3.42083e-07	2.62574e-07	GCLC/FKBP4/CREBBP/ABCC2/NDC1/ATXN3/DNAJA2/PRKACA/HSP90AA1/GSK3B/SEH1L/DNAJA1/NUP50/HSP90AB1/SIRT1/MAPK1/EP300/RBBP7/STUB1/DNAJA3/DNAJB6/BAG1/NUP88/YWHAE/HSPA8/CHORDC1/NUP98/PTGES3/BAG2/NUP155/SUMO1/NUP43/HSPH1/CDKN1A/NUP153/DNAJB1/RPA1/EIF2S1/NUP54/NUP58/DNAJA4/RPTOR/SOD1/AKT1/POLR2D/HSPD1/CAMK2D/BAG3/HSPB8/RANBP2/BAG4/CCAR2/CLPB/SLU7/TP53INP1/PSIP1/VCP/BAG5/ATP2A2/IRAK1/HSF1/MAPT/POM121/HDAC2/NF…	71
GO:0006606	GO:0006606	protein import into nucleus	67/4092	149/17320	7.74158e-09	3.42083e-07	2.62574e-07	KPNA6/CDH1/TNPO3/IPO5/ELAVL1/PSEN1/TNPO1/RBM22/MAVS/NUP50/HSP90AB1/MAPK1/FERMT1/NXT2/KPNA3/NUTF2/UBR5/TGFB1/TNPO2/PIK3R2/KPNB1/NUP88/NUP98/MAPK14/E2F3/NUP155/KPNA1/FAM53C/TARDBP/CSE1L/CDKN1A/NUP153/BMP4/MED1/RPL23/RPAIN/TRIM28/RAN/NUP54/PPP3CA/NUP58/PML/TP53/AKT1/PIK3R1/BAG3/RANBP2/LMNA/NOLC1/SMAD3/STAT3/PKIG/JUP/KPNA2/PTTG1IP/RGPD2/KPNA4/CHP1/POM121/NF1/FLNA/IPO9/IPO7/NUP62/PHB2/POM121C/APPL1	67
GO:0016441	GO:0016441	posttranscriptional gene silencing	70/4092	158/17320	7.7474e-09	3.42083e-07	2.62574e-07	PUM2/NDC1/ELAVL1/ZMPSTE24/SEH1L/TNRC6A/AGO1/NUP50/POLR2E/TNRC6B/POLR2C/TGFB1/NUP88/DDX5/NUP98/CNOT6/NUP155/FXR1/EIF4G1/NUP43/HNRNPA2B1/AGO2/XPO5/NUP153/CNOT1/BMP4/AGO3/ZFP36/AJUBA/PPARG/RAN/H3-3B/PUM1/TUT4/NUP54/PPP3CA/NUP58/NCOR1/TP53/POLR2D/LIMD1/EGFR/POLR2K/CELF1/RANBP2/CNOT8/ADAR/SNIP1/MARF1/SMAD3/STAT3/MAP2K1/SMAD1/RBM4/SMAD2/POLR2L/PRKRA/POLR2A/POM121/HELZ/CNOT7/GIGYF2/TSN/NUP62/EIF6/POM121…	70
GO:0000422	GO:0000422	autophagy of mitochondrion	42/4092	78/17320	7.82938e-09	3.42083e-07	2.62574e-07	GABARAPL2/USP36/ATG5/CSNK2A2/SREBF1/MARK2/TIGAR/HUWE1/MUL1/FBXO7/HIF1A/BNIP3L/CDC37/GSK3A/FBXW7/CAMKK2/PARK7/MFN2/BECN1/ATG14/GABARAPL1/MAP1LC3B/TP53/WDR45B/ATG3/ATG12/WIPI2/PINK1/ATP13A2/HK2/SQSTM1/SLC25A46/GABARAP/ATG13/RNF41/ATG7/SMURF1/SREBF2/ATG9A/VDAC1/PHB2/RB1CC1	42
GO:0061726	GO:0061726	mitochondrion disassembly	42/4092	78/17320	7.82938e-09	3.42083e-07	2.62574e-07	GABARAPL2/USP36/ATG5/CSNK2A2/SREBF1/MARK2/TIGAR/HUWE1/MUL1/FBXO7/HIF1A/BNIP3L/CDC37/GSK3A/FBXW7/CAMKK2/PARK7/MFN2/BECN1/ATG14/GABARAPL1/MAP1LC3B/TP53/WDR45B/ATG3/ATG12/WIPI2/PINK1/ATP13A2/HK2/SQSTM1/SLC25A46/GABARAP/ATG13/RNF41/ATG7/SMURF1/SREBF2/ATG9A/VDAC1/PHB2/RB1CC1	42
GO:0043254	GO:0043254	regulation of protein-containing complex assembly	157/4092	442/17320	7.91158e-09	3.43275e-07	2.63488e-07	FKBP4/DHX33/BAIAP2L1/BID/TMSB10/HSPA5/CYFIP2/EIF2AK2/NCKAP1/RNF4/CTNNA2/RHOA/VPS35/PFN2/CDC42/TFRC/CLASP1/FSCN1/DLG1/CAPZB/SAR1A/HSP90AA1/GSK3B/SSH1/BAX/ADD1/ABL1/SH3GLB1/TFIP11/EP300/PPM1A/MAPRE1/COTL1/STUB1/PIEZO1/MED25/ANKRD27/TGFB1/RAB3A/MTPN/MET/WASL/KANK1/DKK1/PFN1/SLAIN2/HSPA8/BIRC2/GTF2H3/CAND1/WASF1/VEGFA/EIF4G1/ACTR3/SPTBN1/SUMO1/PARK7/CAPZA1/STMN1/CAMSAP2/ABITRAM/VASP/MKKS/RAP1B/TICAM1…	157
GO:0016579	GO:0016579	protein deubiquitination	109/4092	281/17320	8.00728e-09	3.45031e-07	2.64836e-07	ZRANB1/PSMA4/USP36/ATXN3/RHOA/PSME4/UBE2D1/ACTB/ITCH/ATXN7L3/PSMD5/PSMD8/JOSD1/EP300/HIF1A/PSMB5/YY1/PSMA6/PSMA7/USP14/PSMD10/PSMD7/USP10/USP31/USP42/PSMA2/TGFBR1/PSMD3/PSMD11/SMURF2/USP46/BIRC2/SUDS3/SNX3/INO80D/STAM2/PSMD14/USP34/PARK7/RAD23B/DESI2/USP22/USP9X/PSMF1/PSMB2/BECN1/RHOT1/PSMA1/NEDD8/TRAF3/PSME3/APC/MAP3K7/MDM2/TANK/STAM/PSMB7/MYC/USP8/USP3/ARRB2/TP53/FOXK2/SMAD4/PSMA5/RPS27A/ASXL2/…	109
GO:0030111	GO:0030111	regulation of Wnt signaling pathway	134/4092	364/17320	8.20736e-09	3.5123e-07	2.69594e-07	ITGA3/WWTR1/ZRANB1/CUL3/PSMA4/WNK1/CBFB/PSME4/VPS35/LRP6/PSEN1/GSK3B/PSMD5/ABL1/PSMD8/HMGXB4/PPM1A/GSKIP/PSMB5/PSMA6/STK4/PSMA7/GID8/CSNK2A1/FERMT1/PSMD10/TBL1X/XIAP/PSMD7/STK3/UBR5/TLE5/TGFB1/PPP2R1A/GSK3A/CAV1/GRB10/PSMA2/SPIN1/KANK1/LZTS2/TNKS2/DKK1/CCNY/PSMD3/PSMD11/SMURF2/SLC9A3R1/NFKB1/WNT5B/MAPK14/SNX3/PTK7/PPP2CA/CSNK1A1/PSMD14/USP34/HDAC1/WLS/KLHL12/FOXO3/UBE2B/EGR1/SOX4/SOX9/PSMF1/PSMB2…	134
GO:0042770	GO:0042770	signal transduction in response to DNA damage	61/4092	132/17320	1.00857e-08	4.28676e-07	3.29039e-07	BID/CD44/HIPK2/CNOT4/ZMPSTE24/BAX/PCBP4/SIRT1/ABL1/EP300/PSMD10/USP10/NBN/NDRG1/CASP2/DDX5/PRPF19/MAPK14/CNOT6/TFDP2/ARID3A/PLAGL1/FOXO3/CDKN1A/SOX4/CNOT1/PRMT1/SESN2/MDM2/MARCHF7/CNOT6L/PML/TP53/PMAIP1/CARM1/CNOT9/PLK2/CNOT8/PAXIP1/DYRK1A/CNOT11/BTG2/ZNF385A/RPL26/MSX1/ABRAXAS1/E2F7/SPRED1/PPM1D/TRIAP1/ACER2/GRB2/PTTG1IP/RPS27L/TFDP1/SPRED2/MDM4/CNOT7/E2F4/CDC5L/MYO6	61
GO:0043312	GO:0043312	neutrophil degranulation	169/4092	485/17320	1.03481e-08	4.36859e-07	3.35321e-07	ENPP4/LAMP2/MGST1/CD44/ATP6V0A1/VCL/TIMP2/GDI2/ATP11B/CNN2/CDK13/PKM/RHOA/ATP11A/RAB7A/XRCC5/PGM1/PSEN1/HSP90AA1/RAB10/CD59/SCAMP1/CPNE3/B4GALT1/HUWE1/FTL/DYNLL1/CMTM6/SNAP23/HSP90AB1/DSP/RAB18/SNAP29/MAPK1/CYB5R3/ATP6V1D/CST3/VAPA/PGRMC1/MAGT1/DNAJC3/PSMD7/COTL1/ASAH1/GPI/RAB3D/RAB3A/PDAP1/IMPDH1/PSMA2/TSPAN14/PSMD3/KPNB1/PSMD11/RAB5C/VAT1/LAMTOR3/NFKB1/MANBA/HSPA8/MLEC/CAND1/RAB5B/MAPK14/TMEM30…	169
GO:0002446	GO:0002446	neutrophil mediated immunity	173/4092	499/17320	1.05092e-08	4.4068e-07	3.38254e-07	ENPP4/KMT2E/LAMP2/MGST1/CD44/ATP6V0A1/VCL/TIMP2/GDI2/ATP11B/CNN2/CDK13/PKM/RHOA/ATP11A/WDR1/RAB7A/XRCC5/PGM1/PSEN1/HSP90AA1/RAB10/CD59/SCAMP1/CPNE3/B4GALT1/HUWE1/FTL/DYNLL1/CMTM6/SNAP23/HSP90AB1/DSP/RAB18/SNAP29/MAPK1/CYB5R3/ATP6V1D/CST3/VAPA/PGRMC1/MAGT1/DNAJC3/PSMD7/COTL1/ASAH1/GPI/RAB3D/RAB3A/PDAP1/IMPDH1/PSMA2/TSPAN14/PSMD3/KPNB1/PSMD11/RAB5C/VAT1/LAMTOR3/NFKB1/MANBA/HSPA8/MLEC/CAND1/RAB5B/MA…	173
GO:0000381	GO:0000381	regulation of alternative mRNA splicing, via spliceosome	41/4092	76/17320	1.09481e-08	4.56025e-07	3.50032e-07	PTBP1/THRAP3/RBM7/YTHDC1/REST/DDX17/RBFOX2/HNRNPL/DDX5/SRSF9/SRSF3/QKI/FAM172A/FXR1/SRSF7/KHDRBS1/SMU1/SRSF6/KHDRBS3/HNRNPA1/SRSF1/TRA2B/MBNL2/WTAP/RBMX/CELF1/SAP18/MBNL1/HNRNPU/SREK1/DYRK1A/SRSF2/SF1/RBM4B/RBM4/ZBTB7A/SRSF10/RNPS1/RBM15B/SRSF8/RBM8A	41
GO:0016458	GO:0016458	gene silencing	103/4092	263/17320	1.13841e-08	4.71044e-07	3.6156e-07	PUM2/NDC1/ELAVL1/PABPC1/RIF1/SRCAP/ZMPSTE24/SEH1L/TNRC6A/AGO1/NUP50/SIRT1/POLR2E/DDX17/TNRC6B/POLR2C/ERI1/TGFB1/H2AZ2/NUP88/DDX5/NUP98/CNOT6/FAM172A/NUP155/FXR1/NCBP2/EIF4G1/NUP43/HNRNPA2B1/MORF4L2/AGO2/XPO5/NUP153/CNOT1/BMP4/AGO3/ZFP36/AJUBA/DNMT1/CHMP1A/PPARG/RAN/H3-3B/PUM1/TUT4/HMGA1/NUP54/CNOT6L/PPP3CA/NUP58/NCOR1/TP53/POLR2D/CNOT9/LIMD1/EGFR/POLR2K/CELF1/RANBP2/CNOT8/TDRD9/CNOT11/CTBP1/ADAR/…	103
GO:0000380	GO:0000380	alternative mRNA splicing, via spliceosome	45/4092	87/17320	1.21548e-08	4.99628e-07	3.835e-07	PTBP1/THRAP3/CDK13/RBM7/YTHDC1/REST/DDX17/RBFOX2/HNRNPL/DDX5/SRSF9/SRSF3/QKI/FAM172A/FXR1/SRSF7/KHDRBS1/SMU1/SRSF6/KHDRBS3/HNRNPA1/SRSF1/TRA2B/MBNL2/WTAP/RBMX/CELF1/SAP18/MBNL1/HNRNPU/SREK1/DYRK1A/SRSF2/SLU7/SF1/RBM4B/RBM4/RSRC1/ZBTB7A/SRSF10/RNPS1/RBM15B/SRSF8/RBM8A/SFPQ	45
GO:0031047	GO:0031047	gene silencing by RNA	77/4092	181/17320	1.28103e-08	5.23131e-07	4.0154e-07	PUM2/NDC1/ELAVL1/PABPC1/ZMPSTE24/SEH1L/TNRC6A/AGO1/NUP50/POLR2E/DDX17/TNRC6B/POLR2C/ERI1/TGFB1/NUP88/DDX5/NUP98/CNOT6/FAM172A/NUP155/FXR1/NCBP2/EIF4G1/NUP43/HNRNPA2B1/AGO2/XPO5/NUP153/CNOT1/BMP4/AGO3/ZFP36/AJUBA/PPARG/RAN/H3-3B/PUM1/TUT4/NUP54/CNOT6L/PPP3CA/NUP58/NCOR1/TP53/POLR2D/CNOT9/LIMD1/EGFR/POLR2K/CELF1/RANBP2/CNOT8/TDRD9/CNOT11/ADAR/SNIP1/SMAD3/STAT3/MAP2K1/SMAD1/RBM4/SMAD2/POLR2L/PRKRA/P…	77
GO:0036294	GO:0036294	cellular response to decreased oxygen levels	85/4092	206/17320	1.30376e-08	5.28723e-07	4.05833e-07	CFLAR/CREBBP/PSMA4/HIPK2/PDK3/PSME4/ENO1/TIGAR/GNB1/PSMD5/SIRT1/PSMD8/EP300/HIF1A/PSMB5/PSMA6/PSMA7/PSMD10/PGK1/PSMD7/STUB1/NDRG1/BNIP3L/NAMPT/PSMA2/PSMD3/PSMD11/CBL/VEGFA/SLC29A1/STC2/PSMD14/EPAS1/NFE2L2/FOXO3/EGR1/PSMF1/PSMB2/HP1BP3/ATF4/PSMA1/AJUBA/PSME3/PRKAA1/VHL/ROCK2/UBQLN1/MDM2/EGLN1/PSMB7/MYC/TMBIM6/TP53/PMAIP1/AKT1/PSMA5/ARNT/RPS27A/LIMD1/HYOU1/UBC/DDAH1/ELOC/BACH1/PINK1/LMNA/PSMC2/AK4/…	85
GO:0006979	GO:0006979	response to oxidative stress	155/4092	438/17320	1.31165e-08	5.28723e-07	4.05833e-07	GCLC/WNT16/CFLAR/MGST1/GLRX2/ABCC2/FUT8/PNKP/RRM2B/SESN1/PSEN1/NFE2L1/REST/ATRN/SLC23A2/PXN/SIRT1/ABL1/MAPK1/FBXO7/HIF1A/GSKIP/PSMB5/APEX1/CST3/ADNP2/STK24/GSR/PPP2CB/MET/HSPB1/SETX/PLEKHA1/PPIF/AREG/FBXW7/CAMKK2/STX2/SOD2/STC2/UBE3A/PDCD10/LANCL1/STAT1/SDC1/EPAS1/NFE2L2/DHCR24/PARK7/PRDX1/PRDX6/FOXO3/MAPKAP1/CHD6/STAU1/ATF4/SESN2/SELENOS/PRKAA1/KDM6B/EIF2S1/LDHA/STK26/UBQLN1/ANXA1/MDM2/EGLN1/NUD…	155
GO:0071426	GO:0071426	ribonucleoprotein complex export from nucleus	60/4092	130/17320	1.40838e-08	5.64072e-07	4.32966e-07	ZC3H11A/NDC1/U2AF2/XPO1/YTHDC1/SEH1L/ALKBH5/NUP50/POLDIP3/THOC5/PABPN1/CASC3/NUP88/NUP98/SRSF9/SRSF3/NUP155/NCBP2/SRSF7/SMG7/SRSF11/NUP43/FYTTD1/HNRNPA2B1/SRSF6/NUP153/RAN/EIF5A/SRRM1/SRSF1/WDR33/NUP54/NUP58/EIF4A3/POLR2D/EIF4E/RANBP2/SMG1/CHTOP/SRSF2/SLBP/ABCE1/SLU7/NMD3/AGFG1/NPM1/SETD2/XPOT/POM121/NOP9/SDAD1/SARNP/RNPS1/NUP62/ZC3H11B/EIF6/RBM15B/RBM8A/POM121C/CPSF2	60
GO:0048199	GO:0048199	vesicle targeting, to, from or within Golgi	40/4092	74/17320	1.53069e-08	6.09157e-07	4.67572e-07	CUL3/TRAPPC3/NSF/LMAN1/SAR1A/CD59/TMED2/CNIH1/SEC23A/SEC23IP/GBF1/GOSR2/GOSR1/AREG/PPP6R3/SEC24A/TFG/KLHL12/PPP6C/TBC1D20/RAB1A/AP1AR/SEC31A/USO1/SEC24B/CSNK1D/SEC16A/SAR1B/TRAPPC10/TGFA/TRAPPC1/TMED10/RAB1B/SEC24C/MCFD2/TRAPPC6B/TMED9/TRAPPC4/PDCD6/SEC24D	40
GO:0002283	GO:0002283	neutrophil activation involved in immune response	169/4092	488/17320	1.69726e-08	6.71169e-07	5.15171e-07	ENPP4/LAMP2/MGST1/CD44/ATP6V0A1/VCL/TIMP2/GDI2/ATP11B/CNN2/CDK13/PKM/RHOA/ATP11A/RAB7A/XRCC5/PGM1/PSEN1/HSP90AA1/RAB10/CD59/SCAMP1/CPNE3/B4GALT1/HUWE1/FTL/DYNLL1/CMTM6/SNAP23/HSP90AB1/DSP/RAB18/SNAP29/MAPK1/CYB5R3/ATP6V1D/CST3/VAPA/PGRMC1/MAGT1/DNAJC3/PSMD7/COTL1/ASAH1/GPI/RAB3D/RAB3A/PDAP1/IMPDH1/PSMA2/TSPAN14/PSMD3/KPNB1/PSMD11/RAB5C/VAT1/LAMTOR3/NFKB1/MANBA/HSPA8/MLEC/CAND1/RAB5B/MAPK14/TMEM30…	169
GO:0016072	GO:0016072	rRNA metabolic process	93/4092	233/17320	1.96201e-08	7.70985e-07	5.91787e-07	USP36/THUMPD1/RRP15/DIS3/WBP11/DIMT1/DDX18/XRN2/SNU13/DDX17/NOP56/PIN4/ERI1/RPS16/RPS19/GTPBP4/KRR1/MDN1/RPF1/ZNHIT6/NSUN4/UTP25/HEATR1/FCF1/RCL1/WDR55/TENT4B/RPL5/MRM2/RRP36/SBDS/EMG1/METTL16/NSUN5/EXOSC2/DKC1/NOL11/RPL27/WDR36/IMP4/TEX10/RPL35/RPS6/RPS24/WDR12/RPS2/UTP4/NOB1/EIF4A3/RPL11/RPS8/ISG20L2/NAF1/ABT1/RPL7L1/UTP23/SRFBP1/NIFK/RRP1B/DEDD2/RPL26/NOL9/TFB2M/WDR43/UTP15/NSA2/RPS14/DDX21/NO…	93
GO:0044783	GO:0044783	G1 DNA damage checkpoint	36/4092	64/17320	1.98134e-08	7.72917e-07	5.9327e-07	CNOT4/BAX/PCBP4/WAC/EP300/FBXO31/CASP2/CCND1/CNOT6/TFDP2/ARID3A/PLAGL1/CDKN1A/SOX4/CNOT1/PRMT1/MDM2/CNOT6L/PML/TP53/CARM1/CNOT9/PLK2/CNOT8/CNOT11/BTG2/ZNF385A/RPL26/E2F7/TRIAP1/RPS27L/TFDP1/MDM4/CNOT7/GIGYF2/E2F4	36
GO:0010508	GO:0010508	positive regulation of autophagy	60/4092	131/17320	2.00404e-08	7.72917e-07	5.9327e-07	PIK3C2A/ATG5/GNAI3/SESN1/GSK3B/HUWE1/SPTLC1/MUL1/WAC/SIRT1/SH3GLB1/FBXO7/SPTLC2/HIF1A/PIM2/RIPK2/BNIP3L/CDC37/GSK3A/TRIM14/CAMKK2/RAB3GAP1/TMEM59/PARK7/MFN2/FOXO3/RAB3GAP2/TICAM1/EIF2AK4/SH3BP4/SESN2/TRIM5/PRKAA1/MAP3K7/CALCOCO2/TRIM65/PLK2/MTDH/SESN3/PIP4K2A/FOXO1/BAG3/HSPB8/BCL2L11/SCOC/LARP1/PINK1/HK2/TP53INP1/PIP4K2C/PAFAH1B2/TRIM8/SMCR8/HMGB1/SUPT5H/ATG7/SMURF1/TRIM13/PHB2/PIP4K2B	60
GO:0071166	GO:0071166	ribonucleoprotein complex localization	60/4092	131/17320	2.00404e-08	7.72917e-07	5.9327e-07	ZC3H11A/NDC1/U2AF2/XPO1/YTHDC1/SEH1L/ALKBH5/NUP50/POLDIP3/THOC5/PABPN1/CASC3/NUP88/NUP98/SRSF9/SRSF3/NUP155/NCBP2/SRSF7/SMG7/SRSF11/NUP43/FYTTD1/HNRNPA2B1/SRSF6/NUP153/RAN/EIF5A/SRRM1/SRSF1/WDR33/NUP54/NUP58/EIF4A3/POLR2D/EIF4E/RANBP2/SMG1/CHTOP/SRSF2/SLBP/ABCE1/SLU7/NMD3/AGFG1/NPM1/SETD2/XPOT/POM121/NOP9/SDAD1/SARNP/RNPS1/NUP62/ZC3H11B/EIF6/RBM15B/RBM8A/POM121C/CPSF2	60
GO:0001933	GO:0001933	negative regulation of protein phosphorylation	145/4092	407/17320	2.36551e-08	9.06732e-07	6.95982e-07	DBNDD1/PAFAH1B1/RANBP9/GPRC5A/WWTR1/STRAP/WNK1/IPO5/LRP6/TSG101/DLG1/ITCH/PSEN1/MECOM/DNAJA1/BAX/RTRAF/EZR/SIRT1/ABL1/CRKL/FBXO7/GSKIP/TRIB3/PSMD10/DNAJC3/TGFB1/PPP2R1A/PIK3R2/CAV1/HSPB1/PRKAG2/FKTN/EIF3A/DKK1/DUSP3/PRKAR1A/SLC9A3R1/CHORDC1/CBL/HIPK3/CORO1C/SH2B3/DUSP16/STK38/PPP2R5D/HMGCR/PPP2CA/PRKAR2A/EIF4G1/ERRFI1/PARK7/ASH1L/UBE2B/DUSP4/TARDBP/CDKN1A/BMP4/ATG14/PTPRB/LIF/SNX6/MLLT1/LATS1/GPS…	145
GO:0017038	GO:0017038	protein import	82/4092	199/17320	2.51388e-08	9.57726e-07	7.35124e-07	LAMP2/KPNA6/CDH1/TNPO3/IPO5/ELAVL1/PSEN1/HSP90AA1/TNPO1/RBM22/MAVS/NUP50/HSP90AB1/MAPK1/TOMM22/FERMT1/NXT2/KPNA3/NUTF2/LONP2/UBR5/TGFB1/TNPO2/PIK3R2/KPNB1/NUP88/GRPEL1/HSPA8/NUP98/MAPK14/E2F3/NUP155/KPNA1/FAM53C/TARDBP/CSE1L/CDKN1A/NUP153/BMP4/MED1/RPL23/RPAIN/TRIM28/RAN/TIMM17A/NUP54/PPP3CA/NUP58/PML/TP53/AKT1/HSPD1/PIK3R1/BAG3/RANBP2/LMNA/PEX19/GRPEL2/RAB8B/NOLC1/SMAD3/STAT3/PKIG/HSPA4/TOMM20/J…	82
GO:0000288	GO:0000288	nuclear-transcribed mRNA catabolic process, deadenylation-dependent decay	40/4092	75/17320	2.53402e-08	9.59548e-07	7.36522e-07	RC3H2/PABPC1/CNOT4/DIS3/TNRC6A/TNRC6B/DCPS/DDX6/TENT4A/CNOT6/TENT4B/AGO2/CNOT1/ZFP36/LSM4/EXOSC2/TUT4/RC3H1/CNOT6L/WDR61/TOB1/NT5C3B/POLR2D/CNOT9/ZFP36L2/PAN3/CNOT8/CNOT11/BTG2/PATL1/LSM3/DCP2/PDE12/SAMD4B/EDC3/ZFP36L1/CNOT7/DCP1A/EXOSC3/LSM1	40
GO:0071456	GO:0071456	cellular response to hypoxia	81/4092	196/17320	2.614e-08	9.83872e-07	7.55192e-07	CFLAR/CREBBP/PSMA4/HIPK2/PDK3/PSME4/ENO1/TIGAR/GNB1/PSMD5/SIRT1/PSMD8/EP300/HIF1A/PSMB5/PSMA6/PSMA7/PSMD10/PGK1/PSMD7/STUB1/NDRG1/BNIP3L/PSMA2/PSMD3/PSMD11/VEGFA/SLC29A1/STC2/PSMD14/EPAS1/NFE2L2/FOXO3/EGR1/PSMF1/PSMB2/HP1BP3/PSMA1/AJUBA/PSME3/PRKAA1/VHL/ROCK2/UBQLN1/MDM2/EGLN1/PSMB7/MYC/TMBIM6/TP53/PMAIP1/AKT1/PSMA5/ARNT/RPS27A/LIMD1/HYOU1/UBC/DDAH1/ELOC/BACH1/PINK1/LMNA/PSMC2/AK4/CITED2/HIF1AN/R…	81
GO:0050792	GO:0050792	regulation of viral process	86/4092	212/17320	2.75696e-08	1.02533e-06	7.87013e-07	KPNA6/RSF1/EIF2AK2/PKN2/NUCKS1/PABPC1/TSG101/HACD3/RAB7A/CHMP2B/REST/MAVS/CCNK/SRPK1/POLR2E/EP300/NELFCD/CHMP4B/VAPA/POLR2C/ZC3HAV1/CAV2/TRIM14/DDX5/HSPA8/SNX3/STAT1/CHMP3/HDAC1/TRIM32/VPS4B/TARDBP/TRIM25/ZNF639/VAPB/STAU1/GTF2F1/TBC1D20/ZFP36/APOBEC3F/EIF2AK4/CCNT1/ILF3/TRIM28/TRIM5/VPS4A/SRPK2/CDK9/VPS37B/PML/IFITM3/POLR2D/DYNLT1/POLR2K/STOM/HMGA2/FBXL2/UBP1/CHD1/LARP1/RRP1B/ADAR/PPIB/PHB/TRIM8…	86
GO:0051701	GO:0051701	interaction with host	86/4092	212/17320	2.75696e-08	1.02533e-06	7.87013e-07	KPNA6/CDH1/EIF2AK2/ATG5/HIPK2/TFRC/PVR/TSG101/RAB7A/ITCH/CHMP2B/THOC5/PABPN1/CHMP4B/VAPA/KPNA3/SLC1A5/CBLL1/CAV2/CAV1/MET/TRIM14/KPNB1/CBL/NECTIN1/CD81/GAPDH/SNX3/KPNA1/CHMP3/CD46/TRIM32/VPS4B/TCP1/TRIM25/ZNF639/WWP1/VAPB/NUP153/EIF2AK4/LDLR/TRIM28/TRIM5/VPS4A/SCARB2/VPS37B/PML/IFITM3/EPHA2/XPR1/DYNLT1/EGFR/ITGB1/BCL2L11/CXADR/RRAGA/F11R/CTSB/PHB/AXL/RPSA/CTNNB1/SERPINB9/INSR/TRIM8/BCL2L1/DAG1/GR…	86
GO:0035194	GO:0035194	post-transcriptional gene silencing by RNA	68/4092	156/17320	2.7927e-08	1.03247e-06	7.92498e-07	PUM2/NDC1/ELAVL1/ZMPSTE24/SEH1L/TNRC6A/AGO1/NUP50/POLR2E/TNRC6B/POLR2C/TGFB1/NUP88/DDX5/NUP98/CNOT6/NUP155/FXR1/EIF4G1/NUP43/HNRNPA2B1/AGO2/XPO5/NUP153/CNOT1/BMP4/AGO3/ZFP36/AJUBA/PPARG/RAN/H3-3B/PUM1/TUT4/NUP54/PPP3CA/NUP58/NCOR1/TP53/POLR2D/LIMD1/EGFR/POLR2K/CELF1/RANBP2/CNOT8/ADAR/SNIP1/SMAD3/STAT3/MAP2K1/SMAD1/RBM4/SMAD2/POLR2L/PRKRA/POLR2A/POM121/HELZ/CNOT7/TSN/NUP62/EIF6/POM121C/DICER1/TSNA…	68
GO:0031098	GO:0031098	stress-activated protein kinase signaling cascade	110/4092	290/17320	2.84261e-08	1.04259e-06	8.00261e-07	WNT16/MAP3K9/PAFAH1B1/SPAG9/FAS/MAP2K3/CUL1/TAB2/EIF2AK2/HIPK2/KARS1/MAP2K4/RHOA/CDC42/MAP4K4/FBXW11/MAP3K13/HACD3/SEMA3A/DLG1/ITCH/MAGI3/RNF13/ZMPSTE24/MECOM/DNAJA1/MUL1/EZR/CRKL/MAPK1/STK4/MID1/RIPK2/STK3/FKTN/DKK1/DUSP3/NFKB1/HIPK3/LTBR/TPD52L1/MAPK14/VEGFA/HMGCR/SKP1/PDCD10/PRDX1/RAP2A/PRMT1/ZFP36/KLHDC10/TRAF3/GPS2/MEN1/TAOK3/MAP3K7/KAT7/MYC/SDCBP/MAP3K12/IGF1R/MARVELD3/NCOR1/MINK1/APP/AKT1/…	110
GO:2000045	GO:2000045	regulation of G1/S transition of mitotic cell cycle	66/4092	150/17320	2.85343e-08	1.04259e-06	8.00261e-07	KMT2E/BID/CNOT4/BAX/PCBP4/FBXO7/EP300/APEX1/FBXO31/CDK6/CASP2/CCND1/CNOT6/TFDP2/EIF4G1/ID2/ARID3A/PLAGL1/CDKN1A/SOX4/CNOT1/PRMT1/PSME3/ANKRD17/CDC73/ANXA1/CDK4/MDM2/KLF4/RDX/CNOT6L/RB1/PML/TP53/RPTOR/AKT1/CARM1/CTDSP1/CNOT9/CTDSPL/PLK2/EGFR/MEPCE/NACC2/CNOT8/CUL4B/CNOT11/BTG2/ZNF385A/RPL26/SENP2/E2F7/BRD7/TRIAP1/PTEN/CTDSP2/RPS27L/DCUN1D3/ZNF655/TFDP1/MDM4/CNOT7/GIGYF2/E2F4/DDX3X/APPL1	66
GO:1901991	GO:1901991	negative regulation of mitotic cell cycle phase transition	90/4092	225/17320	2.92885e-08	1.06392e-06	8.16636e-07	ZNF207/PSMA4/FOXN3/CUL1/PSME4/CNOT4/BAX/PCBP4/PSMD5/PSMD8/FBXO7/EP300/PSMB5/PSMA6/PSMA7/PSMD10/PSMD7/FBXO31/NBN/CDK6/CASP2/PSMA2/PSMD3/PSMD11/CCND1/CNOT6/SKP1/TFDP2/PSMD14/ARID3A/PLAGL1/CDKN1A/SOX4/CNOT1/PSMF1/PSMB2/PRMT1/PSMG2/PSMA1/PSME3/VPS4A/CDC73/APC/TAOK3/CDK4/MDM2/HUS1/KLF4/PSMB7/CNOT6L/RB1/PML/TP53/CARM1/PSMA5/CTDSP1/CNOT9/CTDSPL/PLK2/NACC2/HMGA2/ZFP36L2/RAD17/BUB3/CNOT8/CNOT11/DONSON/BTG…	90
GO:0006901	GO:0006901	vesicle coating	38/4092	70/17320	2.99072e-08	1.08012e-06	8.29069e-07	CUL3/TRAPPC3/NSF/LMAN1/SAR1A/CD59/TMED2/CNIH1/SEC23A/SEC23IP/GBF1/GOSR2/AREG/PPP6R3/SEC24A/TFG/KLHL12/PPP6C/TBC1D20/RAB1A/SEC31A/USO1/SEC24B/CSNK1D/SEC16A/SAR1B/TRAPPC10/TGFA/TRAPPC1/TMED10/RAB1B/SEC24C/MCFD2/TRAPPC6B/TMED9/TRAPPC4/PDCD6/SEC24D	38
GO:0042119	GO:0042119	neutrophil activation	171/4092	499/17320	3.23212e-08	1.15948e-06	8.89981e-07	ENPP4/KMT2E/LAMP2/MGST1/CD44/ATP6V0A1/VCL/TIMP2/GDI2/ATP11B/CNN2/CDK13/PKM/RHOA/ATP11A/RAB7A/XRCC5/PGM1/PSEN1/HSP90AA1/RAB10/CD59/SCAMP1/CPNE3/B4GALT1/HUWE1/FTL/DYNLL1/CMTM6/SNAP23/HSP90AB1/DSP/RAB18/SNAP29/MAPK1/CYB5R3/ATP6V1D/CST3/VAPA/PGRMC1/MAGT1/DNAJC3/PSMD7/COTL1/ASAH1/GPI/RAB3D/RAB3A/PDAP1/IMPDH1/PSMA2/TSPAN14/PSMD3/KPNB1/PSMD11/RAB5C/VAT1/LAMTOR3/NFKB1/MANBA/HSPA8/MLEC/CAND1/RAB5B/MAPK14/…	171
GO:0007015	GO:0007015	actin filament organization	150/4092	426/17320	3.24757e-08	1.15948e-06	8.89981e-07	BAIAP2L1/TMSB10/CUL3/ARHGAP6/LIMA1/TTC17/CYFIP2/NCKAP1/CTNNA2/RHOA/PFN2/CDC42/WDR1/ACTN1/CLASP1/FSCN1/DLG1/CAPZB/FAT1/SSH1/ADD1/PXN/EZR/ABL1/COTL1/TJP1/MTPN/MET/WASL/LIMK1/TGFBR1/KANK1/PFN1/PPP1R9B/TNFAIP1/CORO1C/WASF1/SRF/ACTR3/SPTBN1/RND3/ALMS1/CAPZA1/STMN1/ABITRAM/PLS1/SDC4/VASP/MKKS/DSTN/ID1/AIF1L/HIP1/CDC42EP1/RAC2/SNX9/ACTN4/LATS1/CAP1/DIAPH1/ARFIP2/MPRIP/SWAP70/MICAL2/SPIRE1/ROCK2/RAC1/ABI…	150
GO:0006473	GO:0006473	protein acetylation	82/4092	200/17320	3.28338e-08	1.16303e-06	8.92712e-07	CREBBP/PHF20/ZZZ3/JADE2/RSF1/ATG5/SRCAP/GSK3B/KAT6A/ZMPSTE24/SIRT1/EP300/CTCF/TAF6/NAA25/ZNF451/KANSL3/ATF2/PARK7/DR1/KMT2A/SET/SUPT7L/KANSL1/NAA50/NAA60/MORF4L2/NCOA3/USP22/SOX4/GTF3C4/LIF/CPA4/PHF10/PRKAA1/WBP2/DPF2/CLOCK/MAP3K7/TAF5L/EPC2/KAT7/ARRB1/NAA30/GLYR1/SMAD4/POLE3/TAF5/FOXO1/KAT6B/PAXIP1/CTBP1/TAOK1/CRTC2/PYGO2/MEAF6/NAA15/BRD7/TAF10/SETD5/MECP2/SIN3A/HCFC1/NAA20/MSL2/RUVBL1/MAGEA2B/M…	82
GO:1905897	GO:1905897	regulation of response to endoplasmic reticulum stress	46/4092	92/17320	3.29477e-08	1.16303e-06	8.92712e-07	HSPA5/HERPUD1/ATXN3/ERLEC1/DERL2/NFE2L1/BAX/ERP29/SIRT1/XBP1/USP14/DNAJC3/BFAR/SGTA/CAV1/TMEM33/LPCAT3/NFE2L2/PARK7/TXNDC12/ATF6/SELENOS/SERINC3/UBAC2/UBQLN1/RNF185/TMBIM6/PMAIP1/PIK3R1/HYOU1/BCL2L11/PPP1R15B/SYVN1/BCL2L1/PTPN2/GRINA/TMEM259/UBE2G2/BCAP31/UBQLN2/PTPN1/UBE2J1/RACK1/MAGEA3/DNAJB9/ERN1	46
GO:0048194	GO:0048194	Golgi vesicle budding	42/4092	81/17320	3.36751e-08	1.18203e-06	9.07296e-07	CUL3/TRAPPC3/NSF/LMAN1/SAR1A/CD59/TMED2/CNIH1/SEC23A/VAPA/SEC23IP/GBF1/GOSR2/AREG/PPP6R3/GOLPH3/SEC24A/TFG/KLHL12/PPP6C/VAPB/TBC1D20/RAB1A/SEC31A/USO1/SEC24B/CSNK1D/GOLPH3L/SEC16A/SAR1B/TRAPPC10/TGFA/TRAPPC1/TMED10/RAB1B/SEC24C/MCFD2/TRAPPC6B/TMED9/TRAPPC4/PDCD6/SEC24D	42
GO:0042273	GO:0042273	ribosomal large subunit biogenesis	39/4092	73/17320	3.54994e-08	1.23911e-06	9.51105e-07	RRP15/DDX18/RPL6/RPLP0/SNU13/RPL3/GTPBP4/MDN1/RPF1/ZNHIT6/RPL5/TRAF7/NIP7/RPL35/WDR12/RPL11/RPL7L1/RPL10/LTO1/NIFK/MALSU1/RPL26/NOL9/NSA2/RSL1D1/RPL38/NPM1/RPL35A/RPL14/NOC2L/RPF2/RPL12/MAK16/RPL23A/SDAD1/RPL10A/EIF6/ZNHIT3/RSL24D1	39
GO:0034250	GO:0034250	positive regulation of cellular amide metabolic process	70/4092	163/17320	3.65716e-08	1.26944e-06	9.74387e-07	IFNGR1/YBX3/ELAVL1/TNFRSF1A/PKM/RHOA/PABPC1/PICALM/MAPK1/POLDIP3/EIF3D/RBM3/DNAJC3/EIF3E/HNRNPL/GSK3A/LARP4B/RPS6KB1/C1QBP/MRPS27/FXR1/EIF4G1/NFE2L2/NSUN4/SERP1/KHDRBS1/RPL5/SOX4/EIF2AK4/NSUN5/EIF2S3/EIF5A/ROCK2/CDK4/EIF4A3/ERBB2/SIRT3/APP/POLR2D/YTHDF1/CDC123/GUF1/UHMK1/LARP1/RPL30/PINK1/LARP4/RPL26/EIF5A2/EEF2/CNBP/RELA/EIF2S3B/NPM1/NGRN/RPS27L/SP1/YTHDF3/RXRA/PLXNB2/RPS4X/YTHDF2/RACK1/DDX3X/EI…	70
GO:0010948	GO:0010948	negative regulation of cell cycle process	121/4092	328/17320	3.75249e-08	1.29534e-06	9.94263e-07	ZNF207/PSMA4/FOXN3/CUL1/WAPL/PSME4/CNOT4/BAX/PCBP4/ZNF268/CBX5/PSMD5/HSP90AB1/PSMD8/FBXO7/EP300/PSMB5/PSMA6/PSMA7/RBBP8/PSMD10/RBBP7/PSMD7/FBXO31/NBN/CDK6/CASP2/PSMA2/PSMD3/PSMD11/PRKAR1A/CCND1/PHC1/CNOT6/SKP1/TFDP2/PSMD14/ARID3A/PLAGL1/CBX3/CDKN1A/SOX4/CNOT1/BMP4/RPL23/PSMF1/MAX/PSMB2/PRMT1/LIF/PSMG2/PSMA1/PSME3/TERF2/VPS4A/MEN1/CDC73/APC/TAOK3/CDK4/MDM2/HUS1/CDK9/KLF4/PSMB7/CNOT6L/RB1/PML/TOM1L…	121
GO:0062012	GO:0062012	regulation of small molecule metabolic process	154/4092	441/17320	3.96056e-08	1.35965e-06	1.04363e-06	NFYA/CYP51A1/ADIPOR2/MBTPS2/ELOVL5/PSMA4/ATP2B4/NDC1/NFYC/PDK3/PSME4/SREBF1/ENO1/TIGAR/PSEN1/NFE2L1/GSK3B/ZMPSTE24/REST/SEH1L/MAEA/PDPR/NUP50/COMT/PSMD5/SIRT1/SCD/PSMD8/EP300/HIF1A/PSMB5/PSMA6/PSMA7/NTSR1/TRIB3/PSMD10/LONP2/PSMD7/OAZ1/AKT2/TGFB1/GSK3A/CAV1/PSMA2/PRKAG2/ERLIN1/PSMD3/KPNB1/NUP88/PSMD11/NFKB1/SC5D/NUP98/LPCAT3/HMGCR/NUP155/PSMD14/ODC1/PARK7/NUP43/EGR1/LPGAT1/NUP153/SOX9/PANK2/PSMF1/…	154
GO:0060828	GO:0060828	regulation of canonical Wnt signaling pathway	108/4092	285/17320	4.0162e-08	1.37121e-06	1.0525e-06	WWTR1/CUL3/PSMA4/WNK1/PSME4/VPS35/LRP6/PSEN1/GSK3B/PSMD5/PSMD8/PPM1A/GSKIP/PSMB5/PSMA6/STK4/PSMA7/GID8/FERMT1/PSMD10/TBL1X/XIAP/PSMD7/STK3/UBR5/TLE5/TGFB1/GSK3A/CAV1/PSMA2/KANK1/LZTS2/TNKS2/DKK1/CCNY/PSMD3/PSMD11/SMURF2/SLC9A3R1/NFKB1/WNT5B/MAPK14/PTK7/CSNK1A1/PSMD14/USP34/HDAC1/WLS/KLHL12/FOXO3/UBE2B/EGR1/SOX4/SOX9/PSMF1/PSMB2/PSMA1/LATS1/PSME3/ZBED3/UBAC2/APC/SCYL2/PSMB7/YAP1/USP8/TLE3/CSNK1D/P…	108
GO:0031571	GO:0031571	mitotic G1 DNA damage checkpoint	35/4092	63/17320	4.77918e-08	1.62284e-06	1.24565e-06	CNOT4/BAX/PCBP4/EP300/FBXO31/CASP2/CCND1/CNOT6/TFDP2/ARID3A/PLAGL1/CDKN1A/SOX4/CNOT1/PRMT1/MDM2/CNOT6L/PML/TP53/CARM1/CNOT9/PLK2/CNOT8/CNOT11/BTG2/ZNF385A/RPL26/E2F7/TRIAP1/RPS27L/TFDP1/MDM4/CNOT7/GIGYF2/E2F4	35
GO:0030522	GO:0030522	intracellular receptor signaling pathway	101/4092	263/17320	5.05752e-08	1.70808e-06	1.31107e-06	TSPAN6/FKBP4/CALCOCO1/RNF14/CYP24A1/TAB2/PUM2/DCBLD2/PLPP1/RHOA/CBFB/PDK3/SREBF1/PIAS2/ITCH/SIRT1/CRKL/DDX17/RBFOX2/EP300/RNF125/XIAP/RIPK2/UBR5/AHR/ZMIZ1/C1QBP/DDX5/BIRC2/ERBIN/NR3C1/UBE3A/PARK7/HDAC1/ARID1A/NR4A1/CNOT1/MED1/NR1D1/RNF6/YWHAH/SEC14L1/ACTN4/LATS1/RARA/PPARG/ANKRD17/WBP2/GPS2/PUM1/CLOCK/MAP3K7/PRCP/YAP1/PML/NCOR1/ARRB2/CARM1/ARNT/PARP1/RPS27A/ASXL2/CNOT9/TIFA/UBC/NR4A2/PPARGC1B/TAB…	101
GO:0016573	GO:0016573	histone acetylation	68/4092	158/17320	5.14085e-08	1.72688e-06	1.32551e-06	CREBBP/PHF20/ZZZ3/JADE2/RSF1/ATG5/SRCAP/KAT6A/ZMPSTE24/SIRT1/EP300/CTCF/TAF6/ZNF451/KANSL3/ATF2/PARK7/DR1/KMT2A/SET/SUPT7L/KANSL1/NAA50/NAA60/MORF4L2/NCOA3/USP22/GTF3C4/LIF/CPA4/PHF10/WBP2/DPF2/CLOCK/MAP3K7/TAF5L/EPC2/KAT7/ARRB1/GLYR1/SMAD4/POLE3/TAF5/KAT6B/PAXIP1/CTBP1/CRTC2/PYGO2/MEAF6/BRD7/TAF10/SETD5/MECP2/SIN3A/HCFC1/MSL2/RUVBL1/MORF4L1/MSL1/NOC2L/TRRAP/LDB1/EID1/TAF9/PCGF2/ING3/BRPF3/RPS6KA5	68
GO:0002262	GO:0002262	myeloid cell homeostasis	66/4092	152/17320	5.32641e-08	1.77965e-06	1.36601e-06	KMT2E/KITLG/HIPK2/SENP1/NFE2L1/BAX/ADD1/MAEA/RBFOX2/HIF1A/ACIN1/RPS19/CDK6/SH2B3/MAPK14/SRF/VEGFA/HSPA9/SMAD5/STAT1/ID2/EPAS1/PRDX1/FOXO3/PTBP3/FAM210B/BMP4/MED1/PRMT1/ZFP36/ANXA1/ACVR1B/IREB2/KAT7/RPS24/TMOD3/RB1/SOD1/ARNT/SLC25A38/MFHAS1/SLC7A11/BCL2L11/CEBPG/FANCC/DMTN/ADAR/NCSTN/FLVCR1/SFXN1/RPS14/JAM3/B2M/AXL/STAT3/KLF13/PIK3CD/SP3/PTPN2/ZBTB7A/RPS17/PDE4B/ZFP36L1/HMGB1/LDB1/LYN	66
GO:0007050	GO:0007050	cell cycle arrest	91/4092	231/17320	5.76742e-08	1.91675e-06	1.47124e-06	KMT2E/RRAGD/PRKACA/TSG101/CNOT4/BAX/PCBP4/ZNF268/HSP90AB1/ABL1/EP300/PPM1A/NBN/MED25/AKT2/TGFB1/CDK6/HBP1/CASP2/RHEB/PRKAG2/TGFBR1/PPP1R9B/LAMTOR3/CCND1/EIF4G2/PRKAB1/CNOT6/TFDP2/PPM1G/ID2/ARID3A/DHCR24/RRAGC/IRF6/PLAGL1/CDKN1A/SOX4/CNOT1/RPL23/PRMT1/EIF2AK4/PRKAB2/PRKAA1/NOTCH2/APC/CDK4/MDM2/CAB39/CDK9/MYC/CNOT6L/RB1/PML/ZFHX3/TP53/RPTOR/CARM1/SDE2/CNOT9/PLK2/TCF7L2/LAMTOR1/HMGA2/CDC123/UHMK1/JM…	91
GO:0048207	GO:0048207	vesicle targeting, rough ER to cis-Golgi	36/4092	66/17320	5.83898e-08	1.9201e-06	1.47382e-06	CUL3/TRAPPC3/NSF/LMAN1/SAR1A/CD59/TMED2/CNIH1/SEC23A/SEC23IP/GOSR2/AREG/PPP6R3/SEC24A/TFG/KLHL12/PPP6C/TBC1D20/RAB1A/SEC31A/USO1/SEC24B/CSNK1D/SEC16A/SAR1B/TRAPPC10/TGFA/TRAPPC1/TMED10/RAB1B/SEC24C/MCFD2/TRAPPC6B/TRAPPC4/PDCD6/SEC24D	36
GO:0048208	GO:0048208	COPII vesicle coating	36/4092	66/17320	5.83898e-08	1.9201e-06	1.47382e-06	CUL3/TRAPPC3/NSF/LMAN1/SAR1A/CD59/TMED2/CNIH1/SEC23A/SEC23IP/GOSR2/AREG/PPP6R3/SEC24A/TFG/KLHL12/PPP6C/TBC1D20/RAB1A/SEC31A/USO1/SEC24B/CSNK1D/SEC16A/SAR1B/TRAPPC10/TGFA/TRAPPC1/TMED10/RAB1B/SEC24C/MCFD2/TRAPPC6B/TRAPPC4/PDCD6/SEC24D	36
GO:1902806	GO:1902806	regulation of cell cycle G1/S phase transition	71/4092	168/17320	6.40539e-08	2.09533e-06	1.60832e-06	KMT2E/BID/ATP2B4/CNOT4/BAX/PCBP4/FBXO7/EP300/APEX1/FBXO31/CDK6/CASP2/FBXW7/CCND1/CNOT6/TFDP2/EIF4G1/ID2/ARID3A/PLAGL1/CDKN1A/SOX4/CNOT1/PRMT1/PSME3/ANKRD17/MEN1/CDC73/ANXA1/CDK4/MDM2/KLF4/RDX/CNOT6L/RB1/PML/TP53/RPTOR/AKT1/CARM1/CTDSP1/CNOT9/CTDSPL/PLK2/EGFR/MEPCE/NACC2/CNOT8/CUL4B/CNOT11/BTG2/ZNF385A/RPL26/SENP2/E2F7/BRD7/STXBP4/TRIAP1/PTEN/CTDSP2/RPS27L/DCUN1D3/ZNF655/TFDP1/MDM4/CNOT7/GIGYF2/E2…	71
GO:0035195	GO:0035195	gene silencing by miRNA	64/4092	147/17320	7.4646e-08	2.42774e-06	1.86347e-06	PUM2/NDC1/ELAVL1/ZMPSTE24/SEH1L/TNRC6A/AGO1/NUP50/POLR2E/TNRC6B/POLR2C/TGFB1/NUP88/DDX5/NUP98/CNOT6/NUP155/FXR1/EIF4G1/NUP43/HNRNPA2B1/AGO2/XPO5/NUP153/CNOT1/BMP4/AGO3/ZFP36/AJUBA/PPARG/RAN/H3-3B/PUM1/TUT4/NUP54/PPP3CA/NUP58/NCOR1/TP53/POLR2D/LIMD1/EGFR/POLR2K/RANBP2/CNOT8/ADAR/SNIP1/SMAD3/STAT3/MAP2K1/SMAD1/RBM4/SMAD2/POLR2L/PRKRA/POLR2A/POM121/CNOT7/NUP62/EIF6/POM121C/DICER1/H3-3A/METTL3	64
GO:0032868	GO:0032868	response to insulin	105/4092	278/17320	7.49927e-08	2.42774e-06	1.86347e-06	GCLC/CFLAR/BAIAP2L1/PIK3C2A/ATP6V0A1/PKM/NUCKS1/ATP2B1/SREBF1/GSK3B/RAB10/SNX5/OSBPL8/SIRT1/XBP1/ATP6V1D/TRIB3/SLC39A14/AKT2/PIK3R2/GSK3A/CAV2/GRB10/KANK1/RPS6KB1/ATP6V0E1/GNAI2/ATP6V1A/GRB14/STAT1/SOS1/ERRFI1/RPE65/SLC2A1/ATP6V0B/FOXO3/RHOQ/GOT1/EGR1/NCOA5/SRSF6/GOT2/MAX/PPAT/SESN2/ATP6V1E1/SELENOS/PPARG/PRKAA1/APC/CDK4/TBC1D4/EPRS1/USO1/IGF1R/PDPK1/AKT1/RAB13/PARP1/ATP6V1C2/PIK3R1/ATP6V1B2/EIF4…	105
GO:0000045	GO:0000045	autophagosome assembly	46/4092	94/17320	7.61145e-08	2.45136e-06	1.88159e-06	IFT88/GABARAPL2/ATG5/VMP1/RAB7A/PSEN1/ATG16L1/SH3GLB1/CHMP4B/RAB3GAP1/MFN2/RAB3GAP2/BECN1/ATG14/TBC1D14/UBQLN1/STX17/RAB1A/GABARAPL1/MAP1LC3B/WDR45B/RAB5A/ATG3/ATG12/FEZ1/PIP4K2A/BAG3/WIPI2/PINK1/TP53INP1/TMEM41B/PIP4K2C/GABARAP/FEZ2/UBXN2A/RAB1B/ATG13/TMEM39A/SMCR8/UBQLN2/ATG7/SMURF1/ATG9A/UBXN2B/PIP4K2B/RB1CC1	46
GO:0030177	GO:0030177	positive regulation of Wnt signaling pathway	74/4092	178/17320	7.69474e-08	2.46547e-06	1.89243e-06	ZRANB1/PSMA4/WNK1/PSME4/VPS35/PSMD5/ABL1/PSMD8/PPM1A/GSKIP/PSMB5/PSMA6/PSMA7/GID8/CSNK2A1/PSMD10/TBL1X/XIAP/PSMD7/UBR5/TGFB1/CAV1/PSMA2/SPIN1/KANK1/TNKS2/DKK1/PSMD3/PSMD11/SMURF2/NFKB1/PTK7/PSMD14/USP34/WLS/UBE2B/SOX4/PSMF1/PSMB2/PSMA1/PSME3/ZBED3/MBD2/CDC73/PSMB7/YAP1/USP8/CSNK1D/PSMA5/ATP6V1C2/EGFR/CSNK1G3/DKK2/SKI/EDA/CCAR2/PSMC2/VCP/SMAD3/RBPJ/CSNK1G1/TNKS/JUP/RUVBL1/CTDNEP1/TBL1XR1/ATP6AP2/A…	74
GO:0033673	GO:0033673	negative regulation of kinase activity	97/4092	252/17320	8.10624e-08	2.57308e-06	1.97503e-06	DBNDD1/GPRC5A/WWTR1/WNK1/IPO5/PPP2R5A/LRP6/TSG101/PSEN1/DNAJA1/RTRAF/SIRT1/ABL1/FBXO7/GSKIP/TRIB3/DNAJC3/PPP2R1A/CAV1/HSPB1/PRKAG2/DUSP3/PRKAR1A/CHORDC1/CBL/HIPK3/CORO1C/SH2B3/DUSP16/STK38/HMGCR/PPP2CA/PRKAR2A/ERRFI1/PARK7/DUSP4/CDKN1A/BMP4/PTPRB/AJUBA/SNX6/MLLT1/LATS1/GPS2/MEN1/APC/TAOK3/DUSP5/DUSP6/RB1/WARS1/IGF1R/PDPK1/RPTOR/AKT1/RUBCN/EPHA1/LATS2/PDCD4/HNRNPU/GNAQ/ADAR/PAQR3/DUSP7/PRDX3/SPRED…	97
GO:1905037	GO:1905037	autophagosome organization	47/4092	97/17320	8.11295e-08	2.57308e-06	1.97503e-06	IFT88/GABARAPL2/ATG5/VMP1/RAB7A/PSEN1/ATG16L1/SH3GLB1/CHMP4B/RAB3GAP1/MFN2/RAB3GAP2/BECN1/ATG14/TBC1D14/UBQLN1/STX17/RAB1A/GABARAPL1/MAP1LC3B/WDR45B/RAB5A/ATG3/ATG12/FEZ1/PIP4K2A/BAG3/WIPI2/PINK1/ATP13A2/TP53INP1/TMEM41B/PIP4K2C/GABARAP/FEZ2/UBXN2A/RAB1B/ATG13/TMEM39A/SMCR8/UBQLN2/ATG7/SMURF1/ATG9A/UBXN2B/PIP4K2B/RB1CC1	47
GO:0044819	GO:0044819	mitotic G1/S transition checkpoint	35/4092	64/17320	8.15589e-08	2.57364e-06	1.97545e-06	CNOT4/BAX/PCBP4/EP300/FBXO31/CASP2/CCND1/CNOT6/TFDP2/ARID3A/PLAGL1/CDKN1A/SOX4/CNOT1/PRMT1/MDM2/CNOT6L/PML/TP53/CARM1/CNOT9/PLK2/CNOT8/CNOT11/BTG2/ZNF385A/RPL26/E2F7/TRIAP1/RPS27L/TFDP1/MDM4/CNOT7/GIGYF2/E2F4	35
GO:0007033	GO:0007033	vacuole organization	72/4092	172/17320	8.24536e-08	2.58879e-06	1.98709e-06	SYT7/IFT88/GABARAPL2/ATG5/VMP1/VPS35/ENO1/RAB7A/PSEN1/ATG16L1/CHMP5/SH3GLB1/CHMP4B/CLN5/SPG11/LAPTM4B/TMEM106B/GNPTAB/RAB3GAP1/MFN2/RAB3GAP2/RAB14/BECN1/ATG14/CLN6/PPT1/TBC1D14/VPS4A/TMEM165/UBQLN1/STX17/RAB1A/SCARB2/GABARAPL1/MAP1LC3B/WDR45B/SNAPIN/ARF1/RAB5A/ATG3/ATG12/LAMTOR1/FEZ1/PIP4K2A/BAG3/WIPI2/PINK1/ATP13A2/TP53INP1/TPP1/TMEM41B/PIP4K2C/GABARAP/FEZ2/UBXN2A/RAB1B/ATG13/TMEM39A/SMCR8/CLVS1…	72
GO:2000134	GO:2000134	negative regulation of G1/S transition of mitotic cell cycle	49/4092	103/17320	8.99768e-08	2.81088e-06	2.15755e-06	CNOT4/BAX/PCBP4/FBXO7/EP300/FBXO31/CDK6/CASP2/CCND1/CNOT6/TFDP2/ARID3A/PLAGL1/CDKN1A/SOX4/CNOT1/PRMT1/CDC73/CDK4/MDM2/KLF4/CNOT6L/RB1/PML/TP53/CARM1/CTDSP1/CNOT9/CTDSPL/PLK2/NACC2/CNOT8/CNOT11/BTG2/ZNF385A/RPL26/E2F7/BRD7/TRIAP1/PTEN/CTDSP2/RPS27L/DCUN1D3/ZNF655/TFDP1/MDM4/CNOT7/GIGYF2/E2F4	49
GO:1901532	GO:1901532	regulation of hematopoietic progenitor cell differentiation	43/4092	86/17320	9.16034e-08	2.84745e-06	2.18562e-06	PSMA4/KITLG/FOXC1/EIF2AK2/CBFB/PSME4/TCF3/PDCD2/ITCH/PSMD5/ABL1/PSMD8/SETD1A/PSMB5/PSMA6/PSMA7/PSMD10/PSMD7/CDK6/PSMA2/PSMD3/PSMD11/HSPA9/PSMD14/SOS1/NFE2L2/KMT2A/PSMF1/PSMB2/PSMA1/PSME3/DPF2/PSMB7/YAP1/TCF12/PSMA5/RUNX1/PSMC2/NUDT21/PSMD12/YTHDF2/LDB1/METTL3	43
GO:1902807	GO:1902807	negative regulation of cell cycle G1/S phase transition	50/4092	106/17320	9.37463e-08	2.89964e-06	2.22568e-06	CNOT4/BAX/PCBP4/FBXO7/EP300/FBXO31/CDK6/CASP2/CCND1/CNOT6/TFDP2/ARID3A/PLAGL1/CDKN1A/SOX4/CNOT1/PRMT1/MEN1/CDC73/CDK4/MDM2/KLF4/CNOT6L/RB1/PML/TP53/CARM1/CTDSP1/CNOT9/CTDSPL/PLK2/NACC2/CNOT8/CNOT11/BTG2/ZNF385A/RPL26/E2F7/BRD7/TRIAP1/PTEN/CTDSP2/RPS27L/DCUN1D3/ZNF655/TFDP1/MDM4/CNOT7/GIGYF2/E2F4	50
GO:0045862	GO:0045862	positive regulation of proteolysis	129/4092	360/17320	9.51883e-08	2.92974e-06	2.24878e-06	GCLC/CFLAR/RNF14/BID/FAS/PIAS1/RNF19A/HERPUD1/CYFIP2/KARS1/ATXN3/RHOA/PSME4/PDCD2/CHFR/FBXW11/PICALM/ENO1/SENP1/PSEN1/GSK3B/REST/BAX/MUL1/SIRT1/BCL2L13/MYH9/TRIB3/PSMD10/STUB1/RIPK2/TNFRSF10A/SGTA/GSK3A/CAV1/CASP2/FBXW7/SH3D19/LPCAT3/MAPK14/BAG2/PERP/CSNK1A1/PSMD14/HSPE1/SUMO1/NFE2L2/TRIM32/TNFRSF10B/HIP1/CLN6/CBFA2T3/SNX9/PSME3/PPARG/ROCK2/TIMM17A/UBQLN1/KHDC1/MDM2/CIDEB/TANK/ANP32B/MYC/MTCH1/AR…	129
GO:1904951	GO:1904951	positive regulation of establishment of protein localization	131/4092	367/17320	9.80439e-08	3.00284e-06	2.30489e-06	NADK/BID/CDH1/RIPOR1/USP36/TM7SF3/IPO5/ACSL4/VPS35/CSNK2A2/CDC42/PRKACA/TSG101/PTPN23/SAR1A/PSEN1/GSK3B/RBM22/HUWE1/PPP1R13B/MAVS/EZR/HSP90AB1/SH3GLB1/MAPK1/XBP1/MIEF1/PPM1A/HIF1A/TM9SF4/NUTF2/ZDHHC2/ZFAND1/UBR5/OAZ1/GPI/AKT2/TGFB1/PIK3R2/GSK3A/YWHAE/UBE2D3/FBXW7/PANX1/CD81/GAPDH/MAPK14/TMEM30A/GOLPH3/SEC24A/TFDP2/PDCD10/CCT4/WLS/TCP1/SERP1/TARDBP/ACSL3/SOX4/YWHAH/RAC2/TRIM28/DKC1/RAN/PRKAA1/XPO4…	131
GO:0090263	GO:0090263	positive regulation of canonical Wnt signaling pathway	63/4092	145/17320	1.031e-07	3.14228e-06	2.41192e-06	PSMA4/WNK1/PSME4/VPS35/PSMD5/PSMD8/PPM1A/GSKIP/PSMB5/PSMA6/PSMA7/GID8/PSMD10/TBL1X/XIAP/PSMD7/UBR5/TGFB1/CAV1/PSMA2/KANK1/TNKS2/PSMD3/PSMD11/SMURF2/NFKB1/PTK7/PSMD14/USP34/WLS/UBE2B/SOX4/PSMF1/PSMB2/PSMA1/PSME3/ZBED3/PSMB7/YAP1/USP8/CSNK1D/PSMA5/EGFR/CSNK1G3/DKK2/EDA/CCAR2/PSMC2/VCP/SMAD3/RBPJ/CSNK1G1/TNKS/JUP/RUVBL1/CTDNEP1/TBL1XR1/RNF220/SRC/PSMD12/CSNK1E/DDX3X/GPRC5B	63
GO:0038127	GO:0038127	ERBB signaling pathway	62/4092	142/17320	1.04534e-07	3.17054e-06	2.43362e-06	PIK3C2A/GPRC5A/PTPN3/CDC42/TSG101/RAB7A/PSEN1/HSP90AA1/CPNE3/SNX5/ABL1/MAPK1/ARHGEF7/STUB1/TGFB1/CDC37/DUSP3/AREG/FBXW7/CBL/ERBIN/HBEGF/STAM2/RTN4/SOS1/ERRFI1/EREG/SOX9/EPS15L1/HIP1/PTPN12/SNX6/RHBDF2/STAM/PDPK1/GAREM1/ERBB2/APP/AKT1/CNOT9/PIK3R1/EGFR/FER/BRAF/SHC1/TGFA/CAMLG/FAM83B/RBPJ/ARF4/PTK2/PTPN2/GRB2/PTPN11/SOCS4/HGS/SRC/NUP62/ITGA1/ERBB3/EPS15/RPS6KA5	62
GO:0008286	GO:0008286	insulin receptor signaling pathway	61/4092	139/17320	1.05703e-07	3.19048e-06	2.44893e-06	BAIAP2L1/PIK3C2A/ATP6V0A1/NUCKS1/SREBF1/GSK3B/SNX5/OSBPL8/SIRT1/ATP6V1D/SLC39A14/AKT2/PIK3R2/GSK3A/CAV2/GRB10/KANK1/RPS6KB1/ATP6V0E1/GNAI2/ATP6V1A/GRB14/SOS1/RPE65/ATP6V0B/FOXO3/RHOQ/NCOA5/ATP6V1E1/PRKAA1/APC/CDK4/IGF1R/AKT1/ATP6V1C2/PIK3R1/ATP6V1B2/EIF4EBP2/SESN3/SOGA1/FOXO1/FER/ATP6V1C1/ADIPOR1/SHC1/STXBP4/NDEL1/IRS1/SIK2/INSR/RELA/SMARCC1/PTPN2/AP3S1/GRB2/PTPN11/ATP6V0C/PTPN1/SRC/IDE/APPL1	61
GO:0045727	GO:0045727	positive regulation of translation	59/4092	133/17320	1.07128e-07	3.21795e-06	2.47001e-06	YBX3/ELAVL1/PKM/RHOA/PABPC1/MAPK1/POLDIP3/EIF3D/RBM3/DNAJC3/EIF3E/HNRNPL/LARP4B/RPS6KB1/C1QBP/MRPS27/FXR1/EIF4G1/NSUN4/SERP1/KHDRBS1/RPL5/SOX4/EIF2AK4/NSUN5/EIF2S3/EIF5A/CDK4/EIF4A3/ERBB2/POLR2D/YTHDF1/CDC123/GUF1/UHMK1/LARP1/RPL30/PINK1/LARP4/RPL26/EIF5A2/EEF2/CNBP/EIF2S3B/NPM1/NGRN/RPS27L/YTHDF3/RXRA/PLXNB2/RPS4X/YTHDF2/DDX3X/EIF6/EIF5AL1/MPV17L2/IMPACT/METTL3/PAIP1	59
GO:0016925	GO:0016925	protein sumoylation	41/4092	81/17320	1.17294e-07	3.50648e-06	2.69147e-06	PIAS1/NDC1/RNF4/PIAS2/SENP1/SEH1L/MUL1/NUP50/UBE2I/ZMIZ1/NUP88/NUP98/ZNF451/NUP155/SUMO1/PARK7/SENP5/NUP43/EGR1/NUP153/UBA2/GNL3L/TRIM28/MDM2/NUP54/NUP58/HMG20A/SAE1/ARNT/RANBP2/SENP2/GNL3/CTNNB1/RELA/MAGEA2B/SUMO3/SUMO2/POM121/NUP62/MAGEA2/POM121C	41
GO:0016482	GO:0016482	cytosolic transport	69/4092	164/17320	1.20303e-07	3.5793e-06	2.74737e-06	SPAG9/SYT7/VAMP3/KIF1B/VPS35/RAB7A/PTPN23/KLHL20/RAB21/ERC1/DOP1A/MTMR2/SNX5/EZR/MAPK1/VTI1B/CLN5/ANKRD27/YKT6/RIC1/RGP1/GBF1/GOSR2/GOSR1/SNX3/CHMP3/RAB14/DENND10/ARL1/VPS26A/BECN1/KIF1C/SNX6/TBC1D5/RBSN/TBC1D14/STX6/RDX/ACTR2/PREPL/AP1AR/CLTC/RAB5A/MSN/SNX12/VTI1A/TRAPPC10/ARFIP1/LMTK2/AP1G1/MAP2K1/KIF5B/TANC2/SNX32/RAB6A/BET1L/ANKFY1/LAMP1/SRSF10/SRC/SYS1/SNX2/EMP2/AP4M1/RAB6C/RAB6D/TBC1D23/EPS…	69
GO:1903076	GO:1903076	regulation of protein localization to plasma membrane	48/4092	101/17320	1.26179e-07	3.73635e-06	2.86792e-06	ITGA3/PRKCH/GOPC/ATP2B4/PPP2R5A/PICALM/ACTB/DLG1/EZR/ZDHHC8/VTI1B/RAB11A/ZDHHC2/TGFB1/RAB11FIP2/PPP1R9B/SPTBN1/TMEM59/RHOQ/PLS1/LYPLA1/ACSL3/VPS4A/NUMB/TMBIM1/PDPK1/CLTC/AKT1/EPHA2/PIK3R1/EGFR/ITGB1/ZDHHC7/ZDHHC5/RER1/LDLRAP1/SQSTM1/AP2M1/CNST/ARF6/STX3/KIF5B/BCL2L1/PRNP/RHOG/RACK1/RSC1A1/APPL1	48
GO:0006839	GO:0006839	mitochondrial transport	100/4092	264/17320	1.29093e-07	3.80458e-06	2.92029e-06	GCLC/SLC25A5/BID/TOMM34/MCUR1/USP36/VPS35/CSNK2A2/SREBF1/LMAN1/PSEN1/HSP90AA1/GSK3B/HUWE1/BAX/PPP1R13B/MUL1/SH3GLB1/SLC25A1/TOMM22/FBXO7/SLC25A15/BNIP3L/GSK3A/PRKAG2/PPIF/YWHAE/UBE2D3/GRPEL1/FBXW7/ATP5F1B/MRPL18/SLC25A36/TFDP2/ATF2/ATP5PB/MFN2/ATP5F1E/SLC25A23/RHOT1/YWHAH/RAC2/PRKAB2/TIMM10B/PRKAA1/YWHAQ/TIMM17A/ATP5MC2/NMT1/TP53/PMAIP1/SAE1/HSPD1/SLC25A38/DYNLT1/SLC25A37/BAG3/ATP5F1A/BCL2L11/TOM…	100
GO:0090114	GO:0090114	COPII-coated vesicle budding	38/4092	73/17320	1.31223e-07	3.83121e-06	2.94073e-06	CUL3/TRAPPC3/NSF/LMAN1/SAR1A/CD59/TMED2/CNIH1/SEC23A/VAPA/SEC23IP/GOSR2/AREG/PPP6R3/SEC24A/TFG/KLHL12/PPP6C/VAPB/TBC1D20/RAB1A/SEC31A/USO1/SEC24B/CSNK1D/SEC16A/SAR1B/TRAPPC10/TGFA/TRAPPC1/TMED10/RAB1B/SEC24C/MCFD2/TRAPPC6B/TRAPPC4/PDCD6/SEC24D	38
GO:1902036	GO:1902036	regulation of hematopoietic stem cell differentiation	38/4092	73/17320	1.31223e-07	3.83121e-06	2.94073e-06	PSMA4/FOXC1/EIF2AK2/CBFB/PSME4/TCF3/ITCH/PSMD5/ABL1/PSMD8/SETD1A/PSMB5/PSMA6/PSMA7/PSMD10/PSMD7/CDK6/PSMA2/PSMD3/PSMD11/HSPA9/PSMD14/NFE2L2/KMT2A/PSMF1/PSMB2/PSMA1/PSME3/PSMB7/YAP1/TCF12/PSMA5/RUNX1/PSMC2/PSMD12/YTHDF2/LDB1/METTL3	38
GO:0072655	GO:0072655	establishment of protein localization to mitochondrion	61/4092	140/17320	1.44488e-07	4.1989e-06	3.22296e-06	BID/TOMM34/USP36/CSNK2A2/SREBF1/LMAN1/HSP90AA1/DNAJA1/HUWE1/BAX/PPP1R13B/SH3GLB1/TOMM22/FBXO7/BNIP3L/GSK3A/YWHAE/UBE2D3/GRPEL1/FBXW7/TFDP2/MFN2/YWHAH/RAC2/TIMM10B/PRKAA1/YWHAQ/TIMM17A/NMT1/TP53/PMAIP1/AKT1/SAE1/HSPD1/BAG3/BCL2L11/TOMM70/OXA1L/BAG4/PINK1/HK2/CALM3/MAIP1/GRPEL2/YWHAZ/YWHAB/MFF/SLC25A6/YWHAG/HSPA4/TOMM20/ATG13/TOMM5/TIMM22/ARIH2/UBE2L3/MAPT/TFDP1/SREBF2/PPP3R1/TIMM23	61
GO:0042542	GO:0042542	response to hydrogen peroxide	59/4092	134/17320	1.47653e-07	4.27101e-06	3.27831e-06	GLRX2/SIRT1/ABL1/APEX1/CST3/STK24/PPP2CB/MET/SETX/PLEKHA1/PPIF/AREG/UBE3A/PDCD10/STAT1/SDC1/NFE2L2/PARK7/FOXO3/PRKAA1/KDM6B/LDHA/STK26/ANXA1/MDM2/TXN/KLF4/APTX/SOD1/RHOB/HSPD1/SIGMAR1/RPS3/FOXO1/MAPK13/PPP1R15B/PINK1/CAPN2/PRDX3/CRK/AXL/EEF2/ADAM9/RELA/NET1/FOSL1/PAWR/NQO1/PYCR1/HSF1/KPNA4/HDAC2/ADA/SRC/PSAP/RACK1/GPX1/PCGF2/IMPACT	59
GO:0018394	GO:0018394	peptidyl-lysine acetylation	71/4092	171/17320	1.4863e-07	4.27944e-06	3.28478e-06	CREBBP/PHF20/ZZZ3/JADE2/RSF1/ATG5/SRCAP/KAT6A/ZMPSTE24/SIRT1/EP300/CTCF/TAF6/ZNF451/KANSL3/ATF2/PARK7/DR1/KMT2A/SET/SUPT7L/KANSL1/NAA50/NAA60/MORF4L2/NCOA3/USP22/SOX4/GTF3C4/LIF/CPA4/PHF10/PRKAA1/WBP2/DPF2/CLOCK/MAP3K7/TAF5L/EPC2/KAT7/ARRB1/GLYR1/SMAD4/POLE3/TAF5/KAT6B/PAXIP1/CTBP1/CRTC2/PYGO2/MEAF6/BRD7/TAF10/SETD5/MECP2/SIN3A/HCFC1/MSL2/RUVBL1/MORF4L1/MSL1/NOC2L/TRRAP/HDAC2/LDB1/EID1/TAF9/PCGF2…	71
GO:0006475	GO:0006475	internal protein amino acid acetylation	69/4092	165/17320	1.5943e-07	4.56935e-06	3.50731e-06	CREBBP/PHF20/ZZZ3/JADE2/RSF1/ATG5/SRCAP/KAT6A/ZMPSTE24/SIRT1/EP300/CTCF/TAF6/ZNF451/KANSL3/ATF2/PARK7/DR1/KMT2A/SET/SUPT7L/KANSL1/NAA50/NAA60/MORF4L2/NCOA3/USP22/GTF3C4/LIF/CPA4/PHF10/WBP2/DPF2/CLOCK/MAP3K7/TAF5L/EPC2/KAT7/ARRB1/GLYR1/SMAD4/POLE3/TAF5/KAT6B/PAXIP1/CTBP1/CRTC2/PYGO2/MEAF6/BRD7/TAF10/SETD5/MECP2/SIN3A/HCFC1/MSL2/RUVBL1/MORF4L1/MAPT/MSL1/NOC2L/TRRAP/LDB1/EID1/TAF9/PCGF2/ING3/BRPF3/R…	69
GO:0019068	GO:0019068	virion assembly	25/4092	40/17320	1.78066e-07	5.08016e-06	3.89938e-06	VTA1/TSG101/CHMP2B/CHMP5/CHMP4B/DDX6/SPCS1/CHMP3/VPS4B/TBC1D20/CHMP1A/VPS4A/RAB1A/VPS37B/RPS27A/CHMP7/USP6NL/UBC/VPS37A/PDCD6IP/UBB/RAB1B/PPIA/UBA52/CHMP1B	25
GO:0070585	GO:0070585	protein localization to mitochondrion	62/4092	144/17320	1.92805e-07	5.47566e-06	4.20297e-06	BID/TOMM34/USP36/CSNK2A2/SREBF1/LMAN1/HSP90AA1/DNAJA1/HUWE1/BAX/PPP1R13B/SH3GLB1/TOMM22/FBXO7/BNIP3L/GSK3A/YWHAE/UBE2D3/GRPEL1/FBXW7/TFDP2/MFN2/YWHAH/RAC2/TIMM10B/PRKAA1/YWHAQ/TIMM17A/NMT1/TP53/PMAIP1/AKT1/SAE1/HSPD1/BAG3/BCL2L11/TOMM70/OXA1L/BAG4/PINK1/HK2/CALM3/MAIP1/GRPEL2/YWHAZ/YWHAB/MFF/SLC25A6/YWHAG/HSPA4/TOMM20/ATG13/TOMM5/TIMM22/ARIH2/UBE2L3/MAPT/MARCHF5/TFDP1/SREBF2/PPP3R1/TIMM23	62
GO:0051403	GO:0051403	stress-activated MAPK cascade	103/4092	276/17320	1.97823e-07	5.59276e-06	4.29285e-06	WNT16/MAP3K9/PAFAH1B1/SPAG9/FAS/MAP2K3/CUL1/TAB2/EIF2AK2/HIPK2/KARS1/MAP2K4/CDC42/MAP4K4/FBXW11/MAP3K13/HACD3/SEMA3A/DLG1/ITCH/MAGI3/MECOM/DNAJA1/MUL1/EZR/CRKL/MAPK1/MID1/RIPK2/STK3/FKTN/DKK1/DUSP3/NFKB1/HIPK3/LTBR/TPD52L1/MAPK14/VEGFA/HMGCR/SKP1/PDCD10/PRDX1/RAP2A/PRMT1/ZFP36/KLHDC10/TRAF3/GPS2/MEN1/TAOK3/MAP3K7/MYC/SDCBP/MAP3K12/IGF1R/MARVELD3/NCOR1/MINK1/APP/AKT1/MAP3K21/RPS27A/ARL6IP5/EGFR/MF…	103
GO:0042177	GO:0042177	negative regulation of protein catabolic process	58/4092	132/17320	2.04493e-07	5.75528e-06	4.41759e-06	CYP51A1/MYCBP2/HFE/GABARAPL2/TIMP2/HIPK2/ERLEC1/VPS35/PTPN3/CSNK2A2/DERL2/SENP1/PSEN1/WAC/HSP90AB1/CSNK2A1/CST3/USP14/LAPTM4B/SGTA/RIC1/RGP1/SNX3/HMGCR/PARK7/RPL5/RPL23/PSMF1/UBAC2/MARCHF7/SDCBP/ATRAID/PML/FURIN/RPL11/EGFR/TLK2/SNX12/AZIN1/CCAR2/ATP13A2/RYBP/CAMLG/BAG5/SMAD3/PHB/RELA/SMARCC1/ANXA2/UBE2G2/SF3B3/FLNA/STYX/MDM4/LRIG2/UBE2J1/TAF9/MAD2L1	58
GO:1903312	GO:1903312	negative regulation of mRNA metabolic process	43/4092	88/17320	2.11366e-07	5.92205e-06	4.5456e-06	PTBP1/THRAP3/YBX3/U2AF2/YBX1/ELAVL1/PABPC1/PCBP4/HNRNPC/HNRNPL/C1QBP/SRSF9/MAPK14/TENT5A/TENT4A/SRSF7/PTBP3/TARDBP/TENT4B/HNRNPA2B1/SRSF6/METTL16/ZFP36/CCNT1/SYNCRIP/CDK9/TOB1/RBMX/TIRAP/SAP18/HNRNPU/LARP1/DYRK1A/HNRNPK/MYD88/HNRNPA0/MEIOC/SRSF10/SUPT5H/CTR9/RNPS1/TAF15/PAIP1	43
GO:0007265	GO:0007265	Ras protein signal transduction	123/4092	344/17320	2.14972e-07	5.99617e-06	4.6025e-06	ITGA3/RALA/TIMP2/CUL3/RIPOR1/ARHGAP6/KITLG/NCKAP1/RHOA/CDC42/MAP4K4/HACD3/GNB1/RAB21/BRAP/ABL1/CRKL/ARHGAP5/PPP2CB/MET/LIMK1/KANK1/GBF1/SHOC2/KPNB1/LRRC59/TNFAIP1/CBL/KCTD10/RAB35/MAPK14/WASF1/ERBIN/SOS1/DHCR24/PARK7/RAP1A/MFN2/SSX2IP/STMN1/MAPKAP1/GNA13/RAP2C/ARFGEF2/CDKN1A/RREB1/RAP2A/RRAS/RAP1B/CDC42EP1/RAC2/TRIM28/DNMT1/RAF1/KRAS/RRAS2/NOTCH2/ROCK2/RAC1/ARRB1/RDX/ARHGAP29/ABI2/USP8/G3BP2/RB1/…	123
GO:0018393	GO:0018393	internal peptidyl-lysine acetylation	68/4092	163/17320	2.17951e-07	6.05225e-06	4.64554e-06	CREBBP/PHF20/ZZZ3/JADE2/RSF1/ATG5/SRCAP/KAT6A/ZMPSTE24/SIRT1/EP300/CTCF/TAF6/ZNF451/KANSL3/ATF2/PARK7/DR1/KMT2A/SET/SUPT7L/KANSL1/NAA50/NAA60/MORF4L2/NCOA3/USP22/GTF3C4/LIF/CPA4/PHF10/WBP2/DPF2/CLOCK/MAP3K7/TAF5L/EPC2/KAT7/ARRB1/GLYR1/SMAD4/POLE3/TAF5/KAT6B/PAXIP1/CTBP1/CRTC2/PYGO2/MEAF6/BRD7/TAF10/SETD5/MECP2/SIN3A/HCFC1/MSL2/RUVBL1/MORF4L1/MSL1/NOC2L/TRRAP/LDB1/EID1/TAF9/PCGF2/ING3/BRPF3/RPS6KA5	68
GO:0046824	GO:0046824	positive regulation of nucleocytoplasmic transport	35/4092	66/17320	2.25028e-07	6.22112e-06	4.77515e-06	CDH1/IPO5/PRKACA/PSEN1/GSK3B/RBM22/MAVS/RBM27/HSP90AB1/MAPK1/PPM1A/NUTF2/UBR5/TGFB1/PIK3R2/YWHAE/CPSF6/MAPK14/NCBP2/TARDBP/KHDRBS1/TRIM28/RAN/XPO4/MDM2/ANP32B/RBM26/TP53/PIK3R1/TCF7L2/BAG3/SMAD3/JUP/FLNA/EMD	35
GO:0043434	GO:0043434	response to peptide hormone	150/4092	438/17320	2.34283e-07	6.44845e-06	4.94965e-06	GCLC/CFLAR/BAIAP2L1/PIK3C2A/ABCC2/ATP6V0A1/ARID1B/PKM/NUCKS1/LRP6/ATP2B1/PRKACA/SREBF1/GSK3B/RAB10/SNX5/PXN/OSBPL8/SIRT1/XBP1/ATP6V1D/APEX1/TRIB3/SLC39A14/AKT2/PIK3R2/GSK3A/CAV2/CAV1/GRB10/KANK1/RPS6KB1/PRKAR1A/NFKB1/AREG/ATP6V0E1/STC2/PRKAR2A/GNAI2/ATP6V1A/GRB14/STAT1/SOS1/NFE2L2/ERRFI1/RPE65/SLC2A1/ATP6V0B/FOXO3/RHOQ/GOT1/EGR1/ADCY7/NR4A1/NCOA5/SRSF6/EREG/GOT2/MAX/RAP1B/GNAI1/PPAT/GDF15/JUND/SE…	150
GO:1900182	GO:1900182	positive regulation of protein localization to nucleus	40/4092	80/17320	2.55051e-07	6.98929e-06	5.36478e-06	CDH1/IPO5/TFRC/PSEN1/RBM22/MAVS/HSP90AB1/MAPK1/NUTF2/UBR5/TGFB1/PIK3R2/MAPK14/CCT4/PARK7/TCP1/TARDBP/LIF/TRIM28/SESN2/DKC1/RAN/KAT7/AKT1/PARP1/PIK3R1/CCT6A/MEPCE/CCT5/BAG3/CCT8/CCT3/CCT2/SMAD3/NMD3/TRIM8/JUP/FLNA/SRC/CD2AP	40
GO:1901988	GO:1901988	negative regulation of cell cycle phase transition	92/4092	241/17320	2.69128e-07	7.34285e-06	5.63617e-06	ZNF207/PSMA4/FOXN3/CUL1/PSME4/CNOT4/BAX/PCBP4/PSMD5/PSMD8/FBXO7/EP300/PSMB5/PSMA6/PSMA7/PSMD10/PSMD7/FBXO31/NBN/CDK6/CASP2/PSMA2/PSMD3/PSMD11/CCND1/CNOT6/SKP1/TFDP2/PSMD14/ARID3A/PLAGL1/CDKN1A/SOX4/CNOT1/PSMF1/PSMB2/PRMT1/PSMG2/PSMA1/PSME3/VPS4A/MEN1/CDC73/APC/TAOK3/CDK4/MDM2/HUS1/KLF4/PSMB7/CNOT6L/RB1/PML/TP53/CARM1/PSMA5/CTDSP1/CNOT9/CTDSPL/PLK2/NACC2/HMGA2/ZFP36L2/RAD17/BUB3/CNOT8/CNOT11/DONSO…	92
GO:0006977	GO:0006977	DNA damage response, signal transduction by p53 class mediator resulting in cell cycle arrest	31/4092	56/17320	3.09561e-07	8.40928e-06	6.45473e-06	CNOT4/BAX/PCBP4/EP300/CASP2/CNOT6/TFDP2/ARID3A/PLAGL1/CDKN1A/SOX4/CNOT1/PRMT1/MDM2/CNOT6L/PML/TP53/CARM1/CNOT9/PLK2/CNOT8/CNOT11/BTG2/ZNF385A/RPL26/E2F7/TRIAP1/TFDP1/MDM4/CNOT7/E2F4	31
GO:0060070	GO:0060070	canonical Wnt signaling pathway	118/4092	329/17320	3.13221e-07	8.47188e-06	6.50278e-06	WNT16/WWTR1/CUL3/PSMA4/WNK1/PSME4/VPS35/LRP6/PSEN1/GSK3B/PSMD5/PSMD8/PPM1A/GSKIP/PSMB5/PSMA6/STK4/PSMA7/GID8/FERMT1/PSMD10/TBL1X/XIAP/PSMD7/FZD3/STK3/UBR5/TLE5/TGFB1/GSK3A/CAV1/PSMA2/KANK1/LZTS2/TNKS2/DKK1/CCNY/PSMD3/PSMD11/SMURF2/SLC9A3R1/NFKB1/WNT5B/MAPK14/PTK7/CSNK1A1/PSMD14/USP34/SDC1/BCL9/HDAC1/WLS/KLHL12/FOXO3/UBE2B/EGR1/SOX4/SOX9/PSMF1/PSMB2/PSMA1/LATS1/PSME3/ZBED3/UBAC2/APC/SCYL2/KLF4/PSM…	118
GO:0009259	GO:0009259	ribonucleotide metabolic process	142/4092	412/17320	3.20623e-07	8.63471e-06	6.62776e-06	AK2/ACSM3/ELOVL5/NDC1/GNAI3/PDE4A/ELOVL1/PKM/RHOA/PDK3/ACSL4/ENO1/VPS9D1/DLG1/NT5C2/TIGAR/PGM1/PSEN1/MAGI3/SEH1L/PDPR/DLD/NUP50/ACOT7/SCD/TECR/SLC25A1/GTPBP1/EP300/HIF1A/GMPR2/PGK1/DHODH/NME4/ACSBG1/BPNT2/GPI/TGFB1/IMPDH1/PRKAG2/NUP88/NUP98/ATP5F1B/GAPDH/TPI1/HMGCR/NUP155/ABHD14B/ATP5PB/DLST/RHOQ/PANK3/NUP43/ADCY7/ACSL3/ATP5F1E/NUP153/PANK2/PAICS/PPAT/CBFA2T3/PPT1/ACLY/PDHA1/MCCC2/RAN/PRKAA1/LDHA…	142
GO:0019693	GO:0019693	ribose phosphate metabolic process	145/4092	423/17320	3.4797e-07	9.33097e-06	7.16219e-06	AK2/ACSM3/ELOVL5/NDC1/GNAI3/PDE4A/ELOVL1/PKM/RHOA/PDK3/ACSL4/ENO1/VPS9D1/DLG1/NT5C2/TIGAR/PGM1/PSEN1/MAGI3/SEH1L/PDPR/DLD/NUP50/ACOT7/SCD/TECR/SLC25A1/GTPBP1/EP300/HIF1A/GMPR2/PRPS2/PGK1/DHODH/NME4/ACSBG1/BPNT2/GPI/TGFB1/IMPDH1/PRKAG2/NUP88/NUP98/ATP5F1B/GAPDH/TPI1/HMGCR/NUP155/ABHD14B/ATP5PB/DLST/RHOQ/PANK3/NUP43/ADCY7/ACSL3/ATP5F1E/NUP153/PANK2/PAICS/PPAT/CBFA2T3/PPT1/ACLY/PDHA1/MCCC2/RAN/PRKAA…	145
GO:0030433	GO:0030433	ubiquitin-dependent ERAD pathway	39/4092	78/17320	3.58947e-07	9.58418e-06	7.35655e-06	RHBDD2/HSPA5/JKAMP/HERPUD1/SEL1L/DERL2/USP14/STUB1/UBXN8/SGTA/CAV1/ERLIN1/CCDC47/UBE4A/FAF2/NFE2L2/EDEM3/TRIM25/SELENOS/UBQLN1/DERL1/RNF185/UBXN4/MARCHF6/ERLIN2/AMFR/SYVN1/STT3B/DNAJB14/VCP/HSP90B1/NPLOC4/UBE2G2/BCAP31/UBQLN2/UBE2J1/TRIM13/DNAJB9/SGTB	39
GO:0006892	GO:0006892	post-Golgi vesicle-mediated transport	48/4092	104/17320	3.81595e-07	1.01115e-05	7.7613e-06	RABEP1/GOPC/VAMP3/AP3D1/EXOC5/NSF/KLHL20/DOP1A/RAB10/SCAMP1/SNAP23/VTI1B/GGA2/GBF1/GOSR2/GOLPH3/SPTBN1/SCAMP3/BLZF1/RAB14/LYPLA1/ACSL3/ARFGEF2/VAMP7/BBS2/RBSN/PREPL/AP1AR/SCAMP2/GOLPH3L/EXOC6B/GOLGA4/GOLGA7/SEC16A/VTI1A/STEAP2/CNST/AP1G1/RAB31/ANKFY1/LAMP1/SYS1/RACK1/RSC1A1/VAMP2/AP4M1/EPS15/VPS13A	48
GO:1902903	GO:1902903	regulation of supramolecular fiber organization	127/4092	361/17320	3.81932e-07	1.01115e-05	7.7613e-06	FKBP4/BAIAP2L1/TMSB10/ARHGAP6/LIMA1/CYFIP2/NCKAP1/CTNNA2/RHOA/PFN2/CDC42/WDR1/CLASP1/DLG1/CAPZB/PSEN1/SSH1/ADD1/PXN/ABL1/MAPRE1/MID1/COTL1/TJP1/MTPN/MET/WASL/LIMK1/TGFBR1/KANK1/PFN1/SLAIN2/HSPA8/WASF1/ACTR3/SPTBN1/ALMS1/PARK7/CAPZA1/STMN1/CAMSAP2/ABITRAM/SDC4/VASP/MKKS/DSTN/ID1/CDC42EP1/LDLR/COLGALT1/SNX9/CAMSAP1/CLIP1/LATS1/ARFIP2/SWAP70/SPIRE1/ROCK2/APC/CKAP2/RAC1/TMOD1/RDX/ACTR2/ABI2/TMOD3/AP1…	127
GO:0006352	GO:0006352	DNA-templated transcription, initiation	93/4092	246/17320	3.8843e-07	1.02401e-05	7.86004e-06	CREBBP/WWTR1/BCLAF1/RSF1/TAF2/CBFB/POLR1A/TEAD2/BAZ2A/RRN3/BAX/POLR2E/MED15/POLR3H/POLR2C/MED25/POLR1F/TAF6/SETX/TFAM/MED13/CCND1/GTF2H3/CAND1/ZNF451/E2F3/SRF/SUB1/NR3C1/DR1/NR4A1/MED20/CDKN1A/SOX9/GTF3C4/POLR1B/GTF2F1/MED1/NR1D1/TAF4/TRIM28/RARA/PPARG/CDK8/NOTCH2/CDK4/CDK9/YAP1/GTF2A2/TAF4B/TP53/POLR2D/POLR2K/NRBF2/TAF5/SMARCA5/NR4A2/GTF2E1/PAXIP1/MAML1/PSMC2/TFB2M/GTF2A1/TAF3/TAF1D/TAF10/CTNNB1…	93
GO:1903008	GO:1903008	organelle disassembly	50/4092	110/17320	3.94193e-07	1.03484e-05	7.94314e-06	GABARAPL2/USP36/ATG5/CSNK2A2/SREBF1/MARK2/TIGAR/HUWE1/MUL1/FBXO7/HIF1A/ZFAND1/BNIP3L/CDC37/GSK3A/GBF1/FBXW7/CAMKK2/PARK7/MFN2/BECN1/ATG14/GABARAPL1/MAP1LC3B/TP53/WDR45B/RETREG3/ATG3/ATG12/MRRF/WIPI2/PINK1/ATP13A2/HK2/SQSTM1/TEX264/SLC25A46/VCP/GABARAP/KIF5B/ATG13/RNF41/ATG7/SMURF1/SREBF2/ATG9A/VDAC1/PHB2/RB1CC1/UFC1	50
GO:0006406	GO:0006406	mRNA export from nucleus	51/4092	113/17320	3.97731e-07	1.03543e-05	7.94765e-06	ZC3H11A/NDC1/U2AF2/YTHDC1/SEH1L/ALKBH5/NUP50/POLDIP3/THOC5/PABPN1/CASC3/NUP88/NUP98/SRSF9/SRSF3/NUP155/NCBP2/SRSF7/SMG7/SRSF11/NUP43/FYTTD1/HNRNPA2B1/SRSF6/NUP153/EIF5A/SRRM1/SRSF1/WDR33/NUP54/NUP58/EIF4A3/POLR2D/EIF4E/RANBP2/SMG1/CHTOP/SRSF2/SLBP/SLU7/AGFG1/SETD2/POM121/SARNP/RNPS1/NUP62/ZC3H11B/RBM15B/RBM8A/POM121C/CPSF2	51
GO:0071427	GO:0071427	mRNA-containing ribonucleoprotein complex export from nucleus	51/4092	113/17320	3.97731e-07	1.03543e-05	7.94765e-06	ZC3H11A/NDC1/U2AF2/YTHDC1/SEH1L/ALKBH5/NUP50/POLDIP3/THOC5/PABPN1/CASC3/NUP88/NUP98/SRSF9/SRSF3/NUP155/NCBP2/SRSF7/SMG7/SRSF11/NUP43/FYTTD1/HNRNPA2B1/SRSF6/NUP153/EIF5A/SRRM1/SRSF1/WDR33/NUP54/NUP58/EIF4A3/POLR2D/EIF4E/RANBP2/SMG1/CHTOP/SRSF2/SLBP/SLU7/AGFG1/SETD2/POM121/SARNP/RNPS1/NUP62/ZC3H11B/RBM15B/RBM8A/POM121C/CPSF2	51
GO:0006163	GO:0006163	purine nucleotide metabolic process	149/4092	438/17320	4.04578e-07	1.04744e-05	8.03986e-06	AK2/ACSM3/ELOVL5/NDC1/GNAI3/PDE4A/ELOVL1/PKM/RHOA/PDK3/ACSL4/ENO1/VPS9D1/DLG1/NT5C2/TIGAR/PGM1/PSEN1/MAGI3/SEH1L/PDPR/DLD/NUP50/ACOT7/SCD/TECR/SLC25A1/GTPBP1/EP300/HIF1A/GMPR2/PRPS2/PGK1/NME4/ACSBG1/BPNT2/GPI/TGFB1/IMPDH1/PRKAG2/NUP88/NUP98/ATP5F1B/GAPDH/TPI1/HMGCR/NUP155/ABHD14B/ATP5PB/DLST/RHOQ/PANK3/NUP43/ADCY7/ACSL3/ATP5F1E/NUP153/PANK2/PAICS/PPAT/CBFA2T3/PPT1/ACLY/PDHA1/MCCC2/RAN/PRKAA1/LDHA…	149
GO:0006469	GO:0006469	negative regulation of protein kinase activity	89/4092	233/17320	4.05699e-07	1.04744e-05	8.03986e-06	DBNDD1/GPRC5A/WWTR1/WNK1/IPO5/LRP6/TSG101/PSEN1/DNAJA1/RTRAF/SIRT1/ABL1/FBXO7/GSKIP/TRIB3/DNAJC3/PPP2R1A/CAV1/HSPB1/PRKAG2/DUSP3/PRKAR1A/CHORDC1/CBL/HIPK3/CORO1C/SH2B3/DUSP16/STK38/HMGCR/PPP2CA/PRKAR2A/ERRFI1/PARK7/DUSP4/CDKN1A/BMP4/PTPRB/SNX6/MLLT1/LATS1/GPS2/MEN1/APC/TAOK3/DUSP5/DUSP6/RB1/WARS1/IGF1R/PDPK1/RPTOR/AKT1/EPHA1/LATS2/PDCD4/GNAQ/ADAR/PAQR3/DUSP7/SPRED1/PKIG/YWHAG/PTEN/TRIB1/PTPN2/SMC…	89
GO:0008088	GO:0008088	axo-dendritic transport	36/4092	70/17320	4.12757e-07	1.06128e-05	8.14608e-06	PAFAH1B1/KIF1B/AP3D1/AP3M2/FBXW11/RAB21/HIF1A/KIF3B/SPG11/BLOC1S6/HSPB1/HSPA8/WASF1/KIF1C/FLOT2/TERF2/ARL8B/SOD1/APP/SNAPIN/FEZ1/DLG2/DST/HNRNPU/AP3S2/NDEL1/KIF5C/KIF5B/AP3S1/TRAK1/AP3M1/PURA/MAPT/BLOC1S2/SFPQ/BLOC1S5	36
GO:0060218	GO:0060218	hematopoietic stem cell differentiation	42/4092	87/17320	4.43952e-07	1.13681e-05	8.72582e-06	PSMA4/FOXC1/EIF2AK2/CBFB/PSME4/TCF3/ITCH/XRCC5/PSMD5/ABL1/PSMD8/SETD1A/PSMB5/PSMA6/PSMA7/PSMD10/PSMD7/CDK6/PSMA2/PSMD3/PSMD11/SRF/HSPA9/PSMD14/NFE2L2/KMT2A/PSMF1/PSMB2/PSMA1/PSME3/PSMB7/YAP1/TCF12/TP53/PSMA5/RUNX1/PSMC2/CHD2/PSMD12/YTHDF2/LDB1/METTL3	42
GO:0009266	GO:0009266	response to temperature stimulus	87/4092	227/17320	4.60442e-07	1.17422e-05	9.01299e-06	GCLC/FKBP4/CREBBP/GLRX2/ABCC2/NDC1/ATXN3/DNAJA2/ATP2B1/PRKACA/HSP90AA1/NFE2L1/GSK3B/SEH1L/WDR47/DNAJA1/NUP50/HSP90AB1/SIRT1/MAPK1/EP300/NTSR1/ZNF516/RBBP7/DNAJC3/STUB1/DNAJA3/DNAJB6/BAG1/NUP88/YWHAE/HSPA8/CHORDC1/NUP98/PTGES3/BAG2/NUP155/SUMO1/NUP43/HSPH1/CDKN1A/NUP153/EIF2AK4/DNAJB1/PPARG/PRKAA1/RPA1/EIF2S1/NUP54/NUP58/DNAJA4/ARRB2/RPTOR/SOD1/AKT1/POLR2D/HSPD1/CAMK2D/FOXO1/BAG3/HSPB8/RANBP2/BAG4…	87
GO:0009150	GO:0009150	purine ribonucleotide metabolic process	137/4092	397/17320	4.7522e-07	1.20698e-05	9.26444e-06	AK2/ACSM3/ELOVL5/NDC1/GNAI3/PDE4A/ELOVL1/PKM/RHOA/PDK3/ACSL4/ENO1/VPS9D1/DLG1/NT5C2/TIGAR/PGM1/PSEN1/MAGI3/SEH1L/PDPR/DLD/NUP50/ACOT7/SCD/TECR/SLC25A1/GTPBP1/EP300/HIF1A/GMPR2/PGK1/NME4/ACSBG1/BPNT2/GPI/TGFB1/IMPDH1/PRKAG2/NUP88/NUP98/ATP5F1B/GAPDH/TPI1/HMGCR/NUP155/ABHD14B/ATP5PB/DLST/RHOQ/PANK3/NUP43/ADCY7/ACSL3/ATP5F1E/NUP153/PANK2/PAICS/PPAT/CBFA2T3/PPT1/ACLY/PDHA1/MCCC2/RAN/PRKAA1/LDHA/NT5E/…	137
GO:1903201	GO:1903201	regulation of oxidative stress-induced cell death	34/4092	65/17320	5.1241e-07	1.29617e-05	9.94904e-06	REST/SIRT1/FBXO7/HIF1A/MET/HSPB1/FBXW7/SOD2/LANCL1/NFE2L2/PARK7/FOXO3/ATF4/STK26/UBQLN1/TXN/SOD1/AKT1/MCL1/PARP1/NONO/SLC7A11/PINK1/OXR1/BAG5/CTNNB1/PAWR/PYCR1/P4HB/ATG7/PSAP/RACK1/GPX1/SFPQ	34
GO:0072431	GO:0072431	signal transduction involved in mitotic G1 DNA damage checkpoint	31/4092	57/17320	5.25397e-07	1.31835e-05	1.01192e-05	CNOT4/BAX/PCBP4/EP300/CASP2/CNOT6/TFDP2/ARID3A/PLAGL1/CDKN1A/SOX4/CNOT1/PRMT1/MDM2/CNOT6L/PML/TP53/CARM1/CNOT9/PLK2/CNOT8/CNOT11/BTG2/ZNF385A/RPL26/E2F7/TRIAP1/TFDP1/MDM4/CNOT7/E2F4	31
GO:1902400	GO:1902400	intracellular signal transduction involved in G1 DNA damage checkpoint	31/4092	57/17320	5.25397e-07	1.31835e-05	1.01192e-05	CNOT4/BAX/PCBP4/EP300/CASP2/CNOT6/TFDP2/ARID3A/PLAGL1/CDKN1A/SOX4/CNOT1/PRMT1/MDM2/CNOT6L/PML/TP53/CARM1/CNOT9/PLK2/CNOT8/CNOT11/BTG2/ZNF385A/RPL26/E2F7/TRIAP1/TFDP1/MDM4/CNOT7/E2F4	31
GO:0033962	GO:0033962	P-body assembly	16/4092	21/17320	5.36959e-07	1.34197e-05	1.03006e-05	DDX6/CNOT6/CNOT1/LSM4/RC3H1/CNOT6L/LIMD1/PAN3/PATL1/ATXN2L/LSM3/EDC3/CNOT7/NBDY/ATXN2/LSM14A	16
GO:1905477	GO:1905477	positive regulation of protein localization to membrane	55/4092	126/17320	5.42049e-07	1.34929e-05	1.03568e-05	ITGA3/AP2B1/BID/PRKCH/ATP2B4/DLG1/SSH1/PPP1R13B/EZR/ZDHHC8/MIEF1/RAB11A/ZDHHC2/AKT2/RAB11FIP2/PPP1R9B/YWHAE/CD81/TFDP2/SPTBN1/MESD/PLS1/ACSL3/YWHAH/YWHAQ/NMT1/PDPK1/TP53/PMAIP1/ERBB2/AKT1/EPHA2/PIK3R1/EGFR/STOM/ITGB1/ZDHHC5/RER1/SQSTM1/CNST/YWHAZ/ARF6/STX3/YWHAB/MFF/YWHAG/KIF5B/PRNP/RHOG/CHP1/MYO1C/TFDP1/SLC5A3/RACK1/PPP3R1	55
GO:0046034	GO:0046034	ATP metabolic process	108/4092	298/17320	5.47658e-07	1.35784e-05	1.04224e-05	AK2/COX10/NADK/COX15/BID/CTNS/NDC1/PKM/RHOA/ENO1/VPS9D1/TIGAR/PGM1/PSEN1/SEH1L/COQ9/NDUFB2/DLD/NUP50/EP300/HIF1A/PGK1/GPI/TGFB1/PRKAG2/PPIF/NUP88/NDUFC1/HSPA8/NUP98/ATP5F1B/GAPDH/TPI1/COX6A1/COX7A2/NUP155/ATP6V1A/PARK7/ATP5PB/NDUFA8/NUP43/ATP5F1E/NUP153/SLC25A23/COX7C/UQCR11/CBFA2T3/PRKAA1/LDHA/ATP5MC2/ISCU/OLA1/NUP54/NUP58/UQCRC2/NCOR1/TP53/FOXK2/APP/ATP1B1/SDHC/ARNT/PARP1/NIPSNAP2/ATP6V1B2/NDUF…	108
GO:0007173	GO:0007173	epidermal growth factor receptor signaling pathway	53/4092	120/17320	5.52653e-07	1.36481e-05	1.04759e-05	PIK3C2A/GPRC5A/PTPN3/CDC42/TSG101/RAB7A/PSEN1/SNX5/ABL1/ARHGEF7/TGFB1/DUSP3/AREG/FBXW7/CBL/ERBIN/HBEGF/STAM2/SOS1/ERRFI1/EREG/SOX9/EPS15L1/HIP1/PTPN12/SNX6/RHBDF2/STAM/PDPK1/GAREM1/APP/AKT1/CNOT9/PIK3R1/EGFR/FER/BRAF/SHC1/TGFA/CAMLG/FAM83B/ARF4/PTK2/PTPN2/GRB2/PTPN11/SOCS4/HGS/SRC/NUP62/ITGA1/EPS15/RPS6KA5	53
GO:1901185	GO:1901185	negative regulation of ERBB signaling pathway	29/4092	52/17320	6.01692e-07	1.48007e-05	1.13606e-05	GPRC5A/PTPN3/CDC42/TSG101/RAB7A/PSEN1/SNX5/ARHGEF7/DUSP3/AREG/CBL/HBEGF/STAM2/ERRFI1/EREG/EPS15L1/PTPN12/SNX6/STAM/ERBB2/EGFR/TGFA/PTPN2/GRB2/SOCS4/HGS/NUP62/ITGA1/EPS15	29
GO:0036473	GO:0036473	cell death in response to oxidative stress	41/4092	85/17320	6.23911e-07	1.5287e-05	1.17339e-05	REST/SIRT1/FBXO7/HIF1A/GSKIP/STK24/MET/HSPB1/FBXW7/SOD2/PDCD10/LANCL1/NFE2L2/PARK7/FOXO3/ATF4/STK26/UBQLN1/TXN/PML/SOD1/AKT1/MCL1/PARP1/ARL6IP5/NONO/SIGMAR1/SLC7A11/PINK1/OXR1/BAG5/CTNNB1/PAWR/PYCR1/DIABLO/P4HB/ATG7/PSAP/RACK1/GPX1/SFPQ	41
GO:0042059	GO:0042059	negative regulation of epidermal growth factor receptor signaling pathway	27/4092	47/17320	6.5865e-07	1.60752e-05	1.23388e-05	GPRC5A/PTPN3/CDC42/TSG101/RAB7A/PSEN1/SNX5/ARHGEF7/DUSP3/AREG/CBL/HBEGF/STAM2/ERRFI1/EREG/EPS15L1/SNX6/STAM/EGFR/TGFA/PTPN2/GRB2/SOCS4/HGS/NUP62/ITGA1/EPS15	27
GO:0071496	GO:0071496	cellular response to external stimulus	115/4092	323/17320	6.74707e-07	1.63492e-05	1.25492e-05	GCLC/LAMP2/HFE/CYP24A1/GLRX2/RRAGD/FAS/GABARAPL2/RIPOR1/HSPA5/EIF2AK2/ATG5/CNN2/MAP2K4/TNFRSF1A/ATP2B1/SREBF1/SESN1/SEH1L/TNRC6A/ITGA6/COMT/SIRT1/SH3GLB1/MAPK1/XBP1/ADNP/STK24/PIEZO1/TNFRSF10A/HNRNPL/TLE5/NAMPT/MTPN/CASP2/PRKAG2/PPP1R9B/NFKB1/HSPA8/CBL/LTBR/SRF/EIF4G1/NFE2L2/RRAGC/SLC2A1/FOXO3/GOT1/TNFRSF10B/CDKN1A/SOX9/MED1/MAX/BECN1/ATG14/ATF4/EIF2AK4/SESN2/PPARG/PRKAA1/EIF2S1/SLC38A2/STK26/DSC…	115
GO:0009185	GO:0009185	ribonucleoside diphosphate metabolic process	59/4092	139/17320	6.7511e-07	1.63492e-05	1.25492e-05	AK2/NDC1/PKM/ENO1/DLG1/TIGAR/PGM1/PSEN1/MAGI3/SEH1L/NUP50/EP300/HIF1A/PGK1/GPI/PRKAG2/NUP88/NUP98/GAPDH/TPI1/NUP155/NUP43/NUP153/CBFA2T3/PRKAA1/LDHA/NUP54/NUP58/NCOR1/FOXK2/APP/ARNT/CASK/AK3/ALDOA/DLG2/PFKM/RANBP2/ADPGK/HK2/JMJD8/CMPK1/AK4/FOXK1/NUDT5/STAT3/PFKFB3/INSR/PGAM1/ZBTB7A/ZBTB20/PRKAG1/PPARA/ENO4/POM121/ENTPD4/NUP62/EIF6/POM121C	59
GO:0036258	GO:0036258	multivesicular body assembly	20/4092	30/17320	6.78304e-07	1.63631e-05	1.25599e-05	VTA1/TSG101/CHMP2B/CHMP5/CHMP4B/RAB11A/STAM2/CHMP3/VPS4B/CHMP1A/VPS4A/VPS36/STAM/VPS37B/CHMP7/VPS37A/PDCD6IP/IST1/HGS/CHMP1B	20
GO:0045930	GO:0045930	negative regulation of mitotic cell cycle	112/4092	313/17320	7.07267e-07	1.69962e-05	1.30458e-05	ZNF207/TIMP2/PSMA4/FOXN3/FOXC1/CUL1/PSME4/PTPN3/CHFR/DLG1/CNOT4/BAX/PCBP4/PSMD5/ABL1/PSMD8/FBXO7/EP300/PSMB5/PSMA6/PSMA7/PSMD10/PSMD7/FBXO31/FZD3/NBN/TGFB1/CDK6/CASP2/PSMA2/PSMD3/PSMD11/SLC9A3R1/CCND1/HECA/CNOT6/SKP1/TFDP2/PSMD14/ATF2/ARID3A/PLAGL1/CDKN1A/SOX4/CNOT1/BMP4/PSMF1/PSMB2/PRMT1/PSMG2/PSMA1/PSME3/VPS4A/CDC73/APC/TAOK3/CDK4/MDM2/HUS1/KLF4/PSMB7/CNOT6L/RB1/PML/TOM1L1/TP53/CARM1/PSMA5/CTDS…	112
GO:0051817	GO:0051817	modulation of process of other organism involved in symbiotic interaction	45/4092	97/17320	7.29294e-07	1.74565e-05	1.33991e-05	EIF2AK2/ATG5/HIPK2/NUCKS1/REST/CCNK/EP300/PABPN1/VAPA/KPNA3/CAV2/KPNB1/HSPA8/GAPDH/KPNA1/HDAC1/TARDBP/ZNF639/VAPB/TBC1D20/EIF2AK4/CCNT1/STOM/HMGA2/BCL2L11/FBXL2/CHD1/RRAGA/RRP1B/SUGT1/PPIB/PHB/SERPINB9/INSR/BCL2L1/CFL1/DAG1/KPNA2/ANXA2/SP1/RXRA/KPNA4/IGF2R/ATG7/PHB2	45
GO:0051222	GO:0051222	positive regulation of protein transport	123/4092	351/17320	7.32012e-07	1.74565e-05	1.33991e-05	NADK/BID/CDH1/RIPOR1/USP36/TM7SF3/IPO5/ACSL4/VPS35/CSNK2A2/CDC42/PRKACA/TSG101/PTPN23/SAR1A/PSEN1/GSK3B/RBM22/HUWE1/PPP1R13B/MAVS/EZR/HSP90AB1/SH3GLB1/MAPK1/XBP1/MIEF1/PPM1A/HIF1A/TM9SF4/NUTF2/ZDHHC2/ZFAND1/UBR5/OAZ1/GPI/AKT2/TGFB1/PIK3R2/GSK3A/YWHAE/UBE2D3/FBXW7/PANX1/CD81/GAPDH/MAPK14/TMEM30A/GOLPH3/SEC24A/TFDP2/PDCD10/WLS/SERP1/TARDBP/ACSL3/SOX4/YWHAH/RAC2/TRIM28/RAN/PRKAA1/XPO4/MYH10/YWHAQ/MD…	123
GO:0036503	GO:0036503	ERAD pathway	46/4092	100/17320	7.45472e-07	1.76428e-05	1.35422e-05	RHBDD2/HSPA5/JKAMP/HERPUD1/ATXN3/ERLEC1/SEL1L/DERL2/USP14/STUB1/UBXN8/SGTA/CAV1/ERLIN1/CCDC47/UBE4A/FAF2/NFE2L2/EDEM3/TRIM25/SELENOS/UBAC2/UBQLN1/DERL1/RNF185/UBXN4/RHBDD1/MARCHF6/ERLIN2/AMFR/SYVN1/STT3B/DNAJB14/VCP/HSP90B1/RNF139/TMEM259/NPLOC4/UBE2G2/BCAP31/UBQLN2/UBE2J1/TRIM13/GET4/DNAJB9/SGTB	46
GO:0044773	GO:0044773	mitotic DNA damage checkpoint	46/4092	100/17320	7.45472e-07	1.76428e-05	1.35422e-05	FOXN3/CNOT4/BAX/PCBP4/EP300/FBXO31/NBN/CASP2/CCND1/CNOT6/TFDP2/ATF2/ARID3A/PLAGL1/CDKN1A/SOX4/CNOT1/PRMT1/TAOK3/MDM2/HUS1/CNOT6L/PML/TP53/CARM1/CNOT9/PLK2/HMGA2/EME1/CNOT8/CNOT11/DONSON/BTG2/TAOK1/MRNIP/ZNF385A/RPL26/E2F7/TRIAP1/RAD9A/RPS27L/TFDP1/MDM4/CNOT7/GIGYF2/E2F4	46
GO:0006090	GO:0006090	pyruvate metabolic process	63/4092	152/17320	7.85856e-07	1.84588e-05	1.41684e-05	NDC1/ME1/PKM/PDK3/ENO1/TIGAR/PGM1/PSEN1/SEH1L/PDPR/DLD/NUP50/EP300/HIF1A/PGK1/GPI/PRKAG2/NUP88/NUP98/GAPDH/TPI1/LDHB/NUP155/NUP43/GLO1/NUP153/CBFA2T3/PDHA1/PRKAA1/LDHA/NUP54/NUP58/NCOR1/SLC16A3/FOXK2/APP/ARNT/ALDOA/PFKM/RANBP2/SLC16A1/ADPGK/HK2/JMJD8/FOXK1/PDP1/SRR/STAT3/PFKFB3/INSR/PGAM1/BSG/PDP2/ZBTB7A/ZBTB20/PRKAG1/PPARA/ENO4/POM121/NUP62/VDAC1/EIF6/POM121C	63
GO:0031123	GO:0031123	RNA 3'-end processing	63/4092	152/17320	7.85856e-07	1.84588e-05	1.41684e-05	ZC3H11A/U2AF2/PABPC1/PAPOLA/POLDIP3/THOC5/PABPN1/PABPC1L/CSTF1/RPRD1B/USB1/ERI1/PTCD1/MTPAP/CASC3/CPSF6/SRSF9/SRSF3/TENT4A/NCBP2/SRSF7/SRSF11/TENT4B/SRSF6/CCNT1/EXOSC2/DKC1/GRSF1/SRRM1/CDC73/TUT4/SRSF1/WDR33/CDK9/INTS14/RPRD1A/EIF4A3/APP/ZNF473/POLR2D/CPSF7/SSU72/CHTOP/SRSF2/RPRD2/SLBP/SLU7/VIRMA/NUDT21/AHCYL1/CSTF3/CSTF2T/HSF1/ZFP36L1/SUPT5H/ERI2/CTR9/SARNP/RNPS1/SCAF8/RBM8A/EXOSC3/CPSF2	63
GO:0044766	GO:0044766	multi-organism transport	34/4092	66/17320	8.17755e-07	1.90647e-05	1.46335e-05	KPNA6/NDC1/TSG101/RAB7A/XPO1/SEH1L/NUP50/KPNA3/CAV2/CAV1/KPNB1/NUP88/NUP98/NUP155/KPNA1/NUP43/NUP153/RAN/NUP54/NUP58/VPS37B/RPS27A/DYNLT1/UBC/RANBP2/VPS37A/UBAP1/UBB/KPNA2/POM121/NUP62/UBA52/POM121C/EPS15	34
GO:1902579	GO:1902579	multi-organism localization	34/4092	66/17320	8.17755e-07	1.90647e-05	1.46335e-05	KPNA6/NDC1/TSG101/RAB7A/XPO1/SEH1L/NUP50/KPNA3/CAV2/CAV1/KPNB1/NUP88/NUP98/NUP155/KPNA1/NUP43/NUP153/RAN/NUP54/NUP58/VPS37B/RPS27A/DYNLT1/UBC/RANBP2/VPS37A/UBAP1/UBB/KPNA2/POM121/NUP62/UBA52/POM121C/EPS15	34
GO:0061014	GO:0061014	positive regulation of mRNA catabolic process	28/4092	50/17320	8.38204e-07	1.94688e-05	1.49437e-05	PABPC1/KHSRP/TNRC6A/GTPBP1/TNRC6B/ZC3HAV1/TARDBP/AGO2/CNOT1/HNRNPR/METTL16/ZFP36/ROCK2/PUM1/RC3H1/CNOT6L/FTO/TOB1/YTHDF1/ZFP36L2/CNOT8/BTG2/ZFP36L1/YTHDF3/YTHDF2/CNOT7/GIGYF2/METTL3	28
GO:0007163	GO:0007163	establishment or maintenance of cell polarity	84/4092	220/17320	8.65142e-07	1.99266e-05	1.52951e-05	PAFAH1B1/CTNNA1/MAP4/RHOA/CDC42/WDR1/MPP5/MARK2/FBXW11/NDE1/CLASP1/FSCN1/ACTB/DLG1/HSP90AA1/GSK3B/FAT1/RAB10/HSP90AB1/CRKL/MYH9/FERMT1/SIPA1L3/KANK1/RAB11FIP2/GBF1/BCCIP/SLC9A3R1/PTK7/ERBIN/GOLPH3/WWC1/AMOTL2/ACTR3/CENPA/RND3/MAPKAP1/PARD6B/RAP1B/RAC2/CAP1/FLOT2/ROCK2/RAC1/ACTR2/RHOF/SNX27/RHOB/WDPCP/DYNLT1/MSN/PARD3/LIN7C/FEZ1/MPP7/ITGB1/DLG2/DLG5/DST/CYRIB/RHOC/ARHGAP35/LMNA/ARPC5/ARF6/AMOTL1/J…	84
GO:0110053	GO:0110053	regulation of actin filament organization	99/4092	270/17320	8.70683e-07	1.99266e-05	1.52951e-05	BAIAP2L1/TMSB10/ARHGAP6/LIMA1/CYFIP2/NCKAP1/CTNNA2/RHOA/PFN2/CDC42/WDR1/CLASP1/DLG1/CAPZB/SSH1/ADD1/PXN/ABL1/COTL1/TJP1/MTPN/MET/WASL/LIMK1/TGFBR1/KANK1/PFN1/WASF1/ACTR3/SPTBN1/ALMS1/CAPZA1/STMN1/ABITRAM/SDC4/VASP/MKKS/DSTN/ID1/CDC42EP1/SNX9/LATS1/ARFIP2/SWAP70/SPIRE1/ROCK2/RAC1/TMOD1/RDX/ACTR2/ABI2/TMOD3/AP1AR/SSH2/ARF1/PHLDB2/PIK3R1/ARHGAP18/EPHA1/TWF1/FER/EPS8/JMY/CYRIB/RHOC/BAG4/WASF2/F11R/DM…	99
GO:0072413	GO:0072413	signal transduction involved in mitotic cell cycle checkpoint	31/4092	58/17320	8.73862e-07	1.99266e-05	1.52951e-05	CNOT4/BAX/PCBP4/EP300/CASP2/CNOT6/TFDP2/ARID3A/PLAGL1/CDKN1A/SOX4/CNOT1/PRMT1/MDM2/CNOT6L/PML/TP53/CARM1/CNOT9/PLK2/CNOT8/CNOT11/BTG2/ZNF385A/RPL26/E2F7/TRIAP1/TFDP1/MDM4/CNOT7/E2F4	31
GO:1902402	GO:1902402	signal transduction involved in mitotic DNA damage checkpoint	31/4092	58/17320	8.73862e-07	1.99266e-05	1.52951e-05	CNOT4/BAX/PCBP4/EP300/CASP2/CNOT6/TFDP2/ARID3A/PLAGL1/CDKN1A/SOX4/CNOT1/PRMT1/MDM2/CNOT6L/PML/TP53/CARM1/CNOT9/PLK2/CNOT8/CNOT11/BTG2/ZNF385A/RPL26/E2F7/TRIAP1/TFDP1/MDM4/CNOT7/E2F4	31
GO:1902403	GO:1902403	signal transduction involved in mitotic DNA integrity checkpoint	31/4092	58/17320	8.73862e-07	1.99266e-05	1.52951e-05	CNOT4/BAX/PCBP4/EP300/CASP2/CNOT6/TFDP2/ARID3A/PLAGL1/CDKN1A/SOX4/CNOT1/PRMT1/MDM2/CNOT6L/PML/TP53/CARM1/CNOT9/PLK2/CNOT8/CNOT11/BTG2/ZNF385A/RPL26/E2F7/TRIAP1/TFDP1/MDM4/CNOT7/E2F4	31
GO:0072521	GO:0072521	purine-containing compound metabolic process	156/4092	468/17320	8.83045e-07	2.00628e-05	1.53996e-05	ENPP4/AK2/ACSM3/ELOVL5/NDC1/GNAI3/PDE4A/ELOVL1/PKM/RHOA/PDK3/ACSL4/ENO1/VPS9D1/DLG1/NT5C2/TIGAR/PGM1/PSEN1/MAGI3/SEH1L/PDPR/DLD/NUP50/ACOT7/SCD/TECR/MTAP/SLC25A1/GTPBP1/EP300/HIF1A/GMPR2/AHCY/PRPS2/PGK1/NME4/ACSBG1/BPNT2/GPI/TGFB1/IMPDH1/PRKAG2/NUP88/NUP98/ATP5F1B/GAPDH/TPI1/HMGCR/NUP155/ABHD14B/ATP5PB/DLST/RHOQ/PANK3/NUP43/ADCY7/AMD1/ACSL3/ATP5F1E/OARD1/NUP153/PANK2/PAICS/PPAT/CBFA2T3/PPT1/ACLY/…	156
GO:1903322	GO:1903322	positive regulation of protein modification by small protein conjugation or removal	59/4092	140/17320	9.0038e-07	2.03825e-05	1.56451e-05	MYCBP2/PIAS1/CUL3/DCUN1D1/HSPA5/UBE2D1/CHFR/HUWE1/FKBP1A/MUL1/TRIB3/PSMD10/XIAP/NDFIP2/STUB1/UBE2I/RIPK2/GSK3A/CAV1/FBXW7/BIRC2/SKP1/UBE3A/UBA2/TICAM1/NDFIP1/UBQLN1/MARCHF7/TANK/CDK9/DERL1/ARRB1/RAB1A/ARRDC4/RPS2/ARRB2/SAE1/BCL10/ARNT/PAXIP1/RNF111/PINK1/RCHY1/SENP2/GNL3/VCP/BMI1/UBB/PTEN/UBE2N/PTTG1IP/MAGEA2B/UBE2L3/DCUN1D3/CTR9/DDX3X/PDCD6/MAGEA2/ARRDC3	59
GO:0009267	GO:0009267	cellular response to starvation	66/4092	162/17320	9.08079e-07	2.04826e-05	1.57219e-05	LAMP2/HFE/RRAGD/FAS/GABARAPL2/RIPOR1/HSPA5/EIF2AK2/ATG5/SREBF1/SESN1/SEH1L/TNRC6A/COMT/SIRT1/SH3GLB1/MAPK1/XBP1/STK24/HNRNPL/PRKAG2/HSPA8/NFE2L2/RRAGC/SLC2A1/FOXO3/CDKN1A/MAX/BECN1/ATG14/ATF4/EIF2AK4/SESN2/PRKAA1/EIF2S1/SLC38A2/STK26/DSC2/HNRNPA1/GLUL/GABARAPL1/MAP1LC3B/TP53/RPTOR/WDR45B/PMAIP1/XPR1/SESN3/FADS1/FOXO1/KLF10/RRAGA/WIPI2/ATF3/WRN/FBXO22/SIK2/GABARAP/PPM1D/PRKAG1/PPARA/ATG7/SREBF2/BM…	66
GO:2001235	GO:2001235	positive regulation of apoptotic signaling pathway	70/4092	175/17320	9.69064e-07	2.17795e-05	1.67174e-05	TNFRSF12A/BID/FAS/BCLAF1/CTNNA1/GSK3B/BAX/PPP1R13B/SIRT1/STK4/STK3/PPP2R1A/GSK3A/CAV1/CASP2/TGFBR1/PPIF/YWHAE/SLC9A3R1/FBXW7/LTBR/TPD52L1/TFDP2/PARK7/RBCK1/PLAGL2/BECN1/YWHAH/TRAF7/SERINC3/YWHAQ/ITM2C/CIDEB/NMT1/PPP2R1B/PML/TP53/PMAIP1/SOD1/RPL11/BCL10/MCL1/NACC2/RPS3/BCL2L11/PINK1/DEDD2/RPL26/PEA15/ATF3/MSX1/YWHAZ/YWHAB/SMAD3/MFF/YWHAG/UBB/BCL2L1/PTEN/PPP1CA/RAD9A/PTPN2/PRKRA/PAK2/BCAP31/NF1/TFD…	70
GO:1903902	GO:1903902	positive regulation of viral life cycle	32/4092	61/17320	1.01355e-06	2.26977e-05	1.74221e-05	KPNA6/PKN2/NUCKS1/PABPC1/TSG101/HACD3/CHMP2B/SRPK1/CHMP4B/VAPA/CAV2/HSPA8/CHMP3/VPS4B/VAPB/STAU1/TBC1D20/VPS4A/SRPK2/VPS37B/STOM/LARP1/ADAR/PPIB/PDE12/TMEM39A/KPNA2/P4HB/PPIA/CNOT7/DDX3X/PPIE	32
GO:1904375	GO:1904375	regulation of protein localization to cell periphery	53/4092	122/17320	1.03616e-06	2.31212e-05	1.77472e-05	ITGA3/PRKCH/GOPC/ATP2B4/PPP2R5A/PICALM/ACTB/DLG1/EZR/ZDHHC8/VTI1B/RAB11A/ZDHHC2/TGFB1/RAB11FIP2/PPP1R9B/SPTBN1/TMEM59/RAP1A/RHOQ/PLS1/LYPLA1/ACSL3/GNAI1/VPS4A/NUMB/TMBIM1/ADAM10/PDPK1/CLTC/AKT1/EPHA2/PIK3R1/EGFR/ITGB1/ZDHHC7/ZDHHC5/RER1/LDLRAP1/EPB41/SQSTM1/AP2M1/CNST/ARF6/STX3/KIF5B/BCL2L1/PRNP/DAG1/RHOG/RACK1/RSC1A1/APPL1	53
GO:0010822	GO:0010822	positive regulation of mitochondrion organization	52/4092	119/17320	1.05077e-06	2.33637e-05	1.79333e-05	BID/ZDHHC6/USP36/VPS35/CSNK2A2/GSK3B/DDHD2/HUWE1/BAX/PPP1R13B/MUL1/SH3GLB1/FBXO7/MIEF1/DDHD1/HIF1A/CDC37/GSK3A/PPIF/YWHAE/UBE2D3/FBXW7/CAMKK2/TFDP2/PARK7/MFN2/YWHAH/RAC2/PRKAA1/SPIRE1/YWHAQ/CIDEB/NMT1/TP53/PMAIP1/SAE1/BCL2L11/PINK1/HK2/YWHAZ/YWHAB/MFF/YWHAG/ATG13/ARIH2/UBE2L3/MARCHF5/TFDP1/SMURF1/SREBF2/PPP3R1/MCU	52
GO:0033119	GO:0033119	negative regulation of RNA splicing	18/4092	26/17320	1.06686e-06	2.36373e-05	1.81433e-05	PTBP1/U2AF2/PCBP4/HNRNPL/C1QBP/RPS13/SRSF9/SRSF7/PTBP3/HNRNPA2B1/SRSF6/TMBIM6/RBMX/SAP18/DYRK1A/HNRNPK/SRSF10/RNPS1	18
GO:0000077	GO:0000077	DNA damage checkpoint	62/4092	150/17320	1.07202e-06	2.36677e-05	1.81666e-05	FOXN3/TP53BP1/CNOT4/BAX/PCBP4/WAC/THOC5/EP300/FBXO31/NBN/CASP2/CCND1/PRPF19/MAPK14/CNOT6/TFDP2/ATF2/ARID3A/PLAGL1/CDKN1A/SOX4/CNOT1/PRMT1/EIF2AK4/CLOCK/TAOK3/MDM2/HUS1/CNOT6L/PML/TP53/CARM1/TIPRL/CNOT9/PLK2/HMGA2/RAD17/EME1/CNOT8/CNOT11/CCAR2/DONSON/BTG2/TAOK1/MRNIP/ZNF385A/RPL26/PEA15/ABRAXAS1/E2F7/FEM1B/TRIAP1/RAD9A/PTPN11/RPS27L/H2AX/TFDP1/MDM4/CNOT7/GIGYF2/E2F4/CDC5L	62
GO:0046794	GO:0046794	transport of virus	33/4092	64/17320	1.15144e-06	2.53317e-05	1.94439e-05	KPNA6/NDC1/TSG101/XPO1/SEH1L/NUP50/KPNA3/CAV2/CAV1/KPNB1/NUP88/NUP98/NUP155/KPNA1/NUP43/NUP153/RAN/NUP54/NUP58/VPS37B/RPS27A/DYNLT1/UBC/RANBP2/VPS37A/UBAP1/UBB/KPNA2/POM121/NUP62/UBA52/POM121C/EPS15	33
GO:0007032	GO:0007032	endosome organization	38/4092	78/17320	1.16316e-06	2.54996e-05	1.95728e-05	VTA1/TSG101/RAB7A/CHMP2B/CHMP5/CHMP4B/RAB11A/LAPTM4B/CLCN3/CORO1C/RAB5B/SNX3/STAM2/CHMP3/VPS4B/ARFGEF2/RAB22A/CHMP1A/VPS4A/STX6/TMEM127/VPS36/STAM/USP8/SCARB2/VPS37B/CHMP7/LAMTOR1/PI4K2A/VPS37A/SQSTM1/USP50/PDCD6IP/RNF26/IST1/HGS/CHMP1B/SNX10	38
GO:0006470	GO:0006470	protein dephosphorylation	113/4092	320/17320	1.33291e-06	2.91191e-05	2.2351e-05	PTBP1/EIF2AK2/PPP1R12A/MTMR1/PPP2R5A/PTPN3/FBXW11/PPP2R2C/DLG1/PTPN23/PPP2R5C/GSK3B/SSH1/MTMR2/FKBP1A/HSP90AB1/PPM1A/CDC25B/RPRD1B/PPP2CB/URI1/TGFB1/PTPRS/PPP2R1A/MINPP1/SHOC2/MTMR4/PPP1R9B/DUSP3/YWHAE/PPP6R3/DUSP16/PTP4A1/PHACTR2/PPP2R5D/PPP2CA/GNAI2/PPM1G/RCAN3/PPP1R8/SET/PTPA/PPP6C/DUSP4/RPAP2/PTPRB/PTPN12/ARPP19/SWAP70/ROCK2/PPP2R1B/DUSP5/PPP3CA/DUSP6/SSH2/RPRD1A/PTPRF/CTTNBP2NL/TIPRL/ENSA/AC…	113
GO:0007034	GO:0007034	vacuolar transport	61/4092	148/17320	1.46134e-06	3.18134e-05	2.4419e-05	M6PR/LAMP2/VTA1/AP3D1/VPS35/TSG101/RAB7A/CHMP2B/CHMP5/HMGXB4/VTI1B/CHMP4B/NDFIP2/MGRN1/MON1B/LEPROTL1/TMEM106B/GOSR2/HSPA8/GNPTAB/CHMP3/VPS4B/VAMP7/BECN1/ATG14/CHMP1A/RBSN/NDFIP1/VPS4A/TGFBRAP1/SCYL2/VPS36/STAM/SCARB2/VPS37B/RNF157/TMEM50B/SNX27/SNAPIN/ARF1/RHOB/CHMP7/VTI1A/VPS37A/PINK1/ATP13A2/VCP/AP1G1/TRAK1/TMEM50A/AP3M1/HGS/ANKFY1/LAMP1/IGF2R/PSAP/SMURF1/AP4M1/CHMP1B/NCOA4/VPS13A	61
GO:0036257	GO:0036257	multivesicular body organization	20/4092	31/17320	1.48598e-06	3.2126e-05	2.4659e-05	VTA1/TSG101/CHMP2B/CHMP5/CHMP4B/RAB11A/STAM2/CHMP3/VPS4B/CHMP1A/VPS4A/VPS36/STAM/VPS37B/CHMP7/VPS37A/PDCD6IP/IST1/HGS/CHMP1B	20
GO:0050686	GO:0050686	negative regulation of mRNA processing	20/4092	31/17320	1.48598e-06	3.2126e-05	2.4659e-05	PTBP1/U2AF2/PCBP4/HNRNPL/C1QBP/SRSF9/SRSF7/PTBP3/HNRNPA2B1/SRSF6/CCNT1/CDK9/RBMX/SAP18/DYRK1A/HNRNPK/SRSF10/SUPT5H/CTR9/RNPS1	20
GO:1903747	GO:1903747	regulation of establishment of protein localization to mitochondrion	36/4092	73/17320	1.52917e-06	3.29457e-05	2.52882e-05	BID/USP36/CSNK2A2/SREBF1/LMAN1/DNAJA1/HUWE1/PPP1R13B/SH3GLB1/BNIP3L/GSK3A/YWHAE/UBE2D3/FBXW7/TFDP2/YWHAH/RAC2/PRKAA1/YWHAQ/NMT1/TP53/PMAIP1/SAE1/BAG3/BAG4/PINK1/YWHAZ/YWHAB/YWHAG/ATG13/ARIH2/UBE2L3/MAPT/TFDP1/SREBF2/PPP3R1	36
GO:0048025	GO:0048025	negative regulation of mRNA splicing, via spliceosome	16/4092	22/17320	1.53453e-06	3.29476e-05	2.52896e-05	PTBP1/U2AF2/PCBP4/HNRNPL/C1QBP/SRSF9/SRSF7/PTBP3/HNRNPA2B1/SRSF6/RBMX/SAP18/DYRK1A/HNRNPK/SRSF10/RNPS1	16
GO:0032535	GO:0032535	regulation of cellular component size	130/4092	380/17320	1.55988e-06	3.33771e-05	2.56193e-05	TNFRSF12A/BAIAP2L1/PAFAH1B1/TMSB10/LIMA1/CYFIP2/NCKAP1/CTNNA2/RHOA/PFN2/WDR1/MAP3K13/PICALM/CLNS1A/SEMA3A/DLG1/CAPZB/RAB21/GSK3B/SSH1/ADD1/EZR/SEMA4G/HSP90AB1/ABL1/ADNP/COTL1/RAB11A/PTPRS/MTPN/WASL/LIMK1/KANK1/PFN1/SLC9A3R1/CLCN3/WASF1/SRF/VEGFA/TTL/ACTR3/SPTBN1/RTN4/CAPZA1/ABITRAM/PLS1/RAB22A/VASP/MKKS/DSTN/HP1BP3/RNF6/CDC42EP1/SNX9/LATS1/ARFIP2/RAP1GAP2/SWAP70/SPIRE1/WDR36/CDK4/RAC1/LRRC8A/TMOD…	130
GO:0019827	GO:0019827	stem cell population maintenance	65/4092	161/17320	1.59425e-06	3.39962e-05	2.60946e-05	ELAVL1/SMC1A/RIF1/REST/KDM2B/POLR2E/MED15/POLR2C/SETD6/BMPR1A/DDX6/BCL9/ARID1A/MED28/FOXO3/ZNF706/ZC3H13/NCOA3/SOX4/CNOT1/SOX9/PAX8/LIF/RAF1/NOTCH2/CDC73/TUT4/TAF5L/KLF4/MYC/YAP1/RTF1/SS18/SMAD4/POLR2D/EPHA1/POLR2K/HMGA2/FOXO1/EIF4E/SAV1/ZFP36L2/MED21/KLF10/SKI/FANCC/WDR43/GNL3/NIPBL/CTNNB1/RBPJ/STAT3/TRIM8/FUT10/SMAD2/POLR2L/MED14/POLR2A/PBX1/BCL9L/CTR9/MTF2/METTL3/LSM1/ZNF322	65
GO:0045732	GO:0045732	positive regulation of protein catabolic process	84/4092	223/17320	1.64961e-06	3.50571e-05	2.69088e-05	GCLC/RNF14/PIAS1/RNF19A/HERPUD1/ATXN3/VPS35/CHFR/NSF/RAB7A/ITCH/PSEN1/HSP90AA1/GSK3B/HUWE1/EZR/TRIB3/CSNK2A1/PSMD10/STUB1/OAZ1/SGTA/GSK3A/CAV1/SMURF2/FBXW7/SH3D19/CD81/BAG2/CSNK1A1/SUMO1/NFE2L2/FBXL5/TRIM32/AREL1/WWP1/SOX9/CBFA2T3/LDLR/SNX9/NDFIP1/APC/UBQLN1/MDM2/RDX/RNF185/TMTC3/FURIN/CSNK1D/AKT1/VGLL4/PLK2/RNF217/MSN/FOXO1/LPCAT1/CUL4B/ZER1/PSMC2/ZYG11B/TIPARP/RCHY1/VCP/ARIH1/FBXO22/ADAM9/PTK2/…	84
GO:0034101	GO:0034101	erythrocyte homeostasis	54/4092	127/17320	1.8483e-06	3.91464e-05	3.00477e-05	KMT2E/HIPK2/SENP1/NFE2L1/ADD1/MAEA/RBFOX2/HIF1A/ACIN1/RPS19/CDK6/SH2B3/MAPK14/SRF/VEGFA/HSPA9/SMAD5/STAT1/ID2/EPAS1/PRDX1/FOXO3/PTBP3/FAM210B/BMP4/MED1/PRMT1/ZFP36/ACVR1B/IREB2/KAT7/RPS24/TMOD3/RB1/ARNT/SLC25A38/MFHAS1/CEBPG/DMTN/ADAR/FLVCR1/SFXN1/RPS14/B2M/AXL/STAT3/KLF13/SP3/PTPN2/ZBTB7A/RPS17/ZFP36L1/LDB1/LYN	54
GO:1902882	GO:1902882	regulation of response to oxidative stress	41/4092	88/17320	1.95015e-06	4.10253e-05	3.14899e-05	FUT8/SESN1/REST/SIRT1/FBXO7/HIF1A/MET/HSPB1/FBXW7/SOD2/LANCL1/NFE2L2/PARK7/FOXO3/MAPKAP1/ATF4/SESN2/STK26/UBQLN1/TXN/SIRT3/SOD1/AKT1/MCL1/PARP1/NONO/SESN3/SLC7A11/PINK1/SELENON/OXR1/BAG5/CTNNB1/PAWR/PYCR1/P4HB/ATG7/PSAP/RACK1/GPX1/SFPQ	41
GO:1903321	GO:1903321	negative regulation of protein modification by small protein conjugation or removal	41/4092	88/17320	1.95015e-06	4.10253e-05	3.14899e-05	GCLC/ATG5/U2AF2/RNF4/PSEN1/DNAJA1/ABL1/UBR5/CAV1/LIMK1/GTPBP4/BAG2/PARK7/IVNS1ABP/RPL5/SOX4/RPL23/GNL3L/GPS2/MARCHF7/ARRB1/HMG20A/ARRB2/AKT1/RPL11/SPOPL/RPS3/SQSTM1/SENP2/CAMLG/BAG5/TRIM44/NXN/CTNNB1/RELA/PARP10/MAGEA2B/CHP1/SIRT7/MAGEA2/MAD2L1	41
GO:0045787	GO:0045787	positive regulation of cell cycle	129/4092	378/17320	1.97384e-06	4.13844e-05	3.17655e-05	POLDIP2/CDC27/KMT2E/DBF4/PAFAH1B1/WIZ/CUL3/PKN2/RHOA/LRP6/CDC42/PRKACA/CNOT4/CCNT2/BAX/CCNK/PCBP4/ZNF268/CDC23/HSP90AB1/ABL1/THOC5/EP300/APEX1/CDC25B/KIF3B/PSMD10/RAB11A/MED25/CASP2/CCNY/RPS6KB1/DUSP3/CCND1/CNOT6/TFDP2/KLHL18/EIF4G1/TTL/ID2/ARID3A/PLAGL1/UBE2B/TRIM32/VPS4B/CKS2/USP22/CDKN1A/SOX4/EREG/CNOT1/MED1/RPL23/PRMT1/BECN1/CCNT1/RARA/ANKRD17/ROCK2/CDC73/RPS15A/ANXA1/SRPK2/CDK4/MDM2/CDK9/RDX…	129
GO:0070936	GO:0070936	protein K48-linked ubiquitination	30/4092	57/17320	2.00633e-06	4.17852e-05	3.20731e-05	RNF4/UBE2D1/UBE2A/UBE2K/ITCH/RFFL/BFAR/UBR5/UBE2R2/UBE2D3/BIRC2/UBE3A/UBE2B/TRIM32/RNF6/UBE2D2/UBE2G1/MARCHF6/AMFR/SYVN1/TRIM44/RNF187/UBE2E3/UBE2E1/RNF34/ARIH2/TTC3/UBE2G2/ZNRF1/UBE2H	30
GO:0075733	GO:0075733	intracellular transport of virus	30/4092	57/17320	2.00633e-06	4.17852e-05	3.20731e-05	KPNA6/NDC1/TSG101/XPO1/SEH1L/NUP50/KPNA3/KPNB1/NUP88/NUP98/NUP155/KPNA1/NUP43/NUP153/RAN/NUP54/NUP58/VPS37B/RPS27A/DYNLT1/UBC/RANBP2/VPS37A/UBAP1/UBB/KPNA2/POM121/NUP62/UBA52/POM121C	30
GO:2001020	GO:2001020	regulation of response to DNA damage stimulus	84/4092	224/17320	2.03459e-06	4.2233e-05	3.24168e-05	BID/CD44/BCLAF1/PNKP/FAM168A/TP53BP1/TIGAR/RIF1/ZMPSTE24/SIRT1/ABL1/TFIP11/THOC5/PSMD10/UBR5/DDX5/NSD2/KMT5B/FXR1/TRIM32/CYREN/DEK/AUNIP/TRIM28/TERF2/TPT1/SPIRE1/MDM2/KAT7/MARCHF7/CDK9/MYC/ACTR2/PML/TP53/PMAIP1/MCL1/PARP1/EGFR/NACC2/RPS3/HMGA2/CEBPG/MMS19/SMG1/PAXIP1/DYRK1A/EYA3/CCAR2/UBQLN4/MRNIP/ZNF385A/RPL26/MSX1/ABRAXAS1/PPP4R2/RNF168/SPIDR/HNRNPK/DDIAS/SPRED1/RNF169/FEM1B/UBE2V2/POLH/TRIAP1/…	84
GO:0043123	GO:0043123	positive regulation of I-kappaB kinase/NF-kappaB signaling	73/4092	188/17320	2.13766e-06	4.42256e-05	3.39463e-05	TSPAN6/CFLAR/TAB2/TNFRSF1A/RHOA/TFRC/FKBP1A/MAVS/MUL1/ABL1/PPM1A/VAPA/PIM2/NDFIP2/UBE2I/RIPK2/TRIM14/BIRC2/LTBR/GOLT1B/TFG/WLS/TRIM32/NEK6/TNFRSF10B/TRIM25/RBCK1/TICAM1/AJUBA/NDFIP1/TRIM5/ANKRD17/MAP3K7/BRD4/AKT1/BCL10/SLC20A1/TIFA/PLK2/MTDH/TIRAP/RHOC/SLC35B2/TAB3/TMED4/EDA/PINK1/JMJD8/REL/SHISA5/F2RL1/DDX21/CTNNB1/TRIM8/CANT1/CXXC5/MYD88/RELA/TMEM9B/UBE2N/SHARPIN/F2R/IRAK1/LITAF/FLNA/MIER1/TRIM…	73
GO:0007006	GO:0007006	mitochondrial membrane organization	57/4092	137/17320	2.23482e-06	4.6083e-05	3.5372e-05	GCLC/SLC25A5/BID/HSP90AA1/GSK3B/BAX/PPP1R13B/MUL1/TOMM22/BNIP3L/GSK3A/CHCHD3/PPIF/YWHAE/ATP5F1B/HSPA9/TFDP2/ATF2/ATP5PB/MFN2/ATP5F1E/RHOT1/YWHAH/IMMT/YWHAQ/ATP5MC2/NMT1/TP53/PMAIP1/DYNLT1/ATP5F1A/BCL2L11/ATP5MC3/APOOL/OXA1L/PINK1/HK2/CALM3/MAIP1/YWHAZ/YWHAB/STAT3/LETM1/YWHAG/HSPA4/BCL2L1/TOMM20/MTX3/TIMM22/APOO/CIBAR1/BLOC1S2/TFDP1/SLC35F6/PPP3R1/ATP5MF/THEM4	57
GO:0000910	GO:0000910	cytokinesis	68/4092	172/17320	2.24744e-06	4.61908e-05	3.54548e-05	TTC19/CUL3/PKN2/RHOA/CDC42/CHMP2B/CHMP5/EFHC1/SH3GLB1/MYH9/CDC25B/KIF3B/CHMP4B/RAB11A/LZTS2/GIT1/RAB35/ACTR3/CENPA/SPTBN1/CHMP3/BIRC6/STMN1/VPS4B/ANXA11/SEPTIN7/BECN1/SNX9/CHMP1A/VPS4A/MYH10/SPIRE1/ROCK2/APC/CKAP2/NUSAP1/ACTR2/USP8/SEPTIN11/ARF1/RHOB/CALM2/PKP4/PLK2/CETN2/CHMP7/AHCTF1/RHOC/SON/CALM3/CXCR5/KLHL21/E2F7/SEPTIN2/PDCD6IP/BCL2L1/CFL1/SNX18/SETD2/IST1/SEPTIN9/SEPTIN10/PRPF40A/KLHL9/CALM…	68
GO:0035329	GO:0035329	hippo signaling	25/4092	44/17320	2.25668e-06	4.62285e-05	3.54837e-05	WWTR1/MAP2K3/TEAD2/STK4/TJP1/STK3/YWHAE/MAPK14/WWC1/AMOTL2/MOB1A/AJUBA/LATS1/YAP1/VGLL4/LIMD1/LATS2/DLG5/SAV1/AMOTL1/YWHAB/MOB1B/NF2/TEAD1/PJA2	25
GO:0008154	GO:0008154	actin polymerization or depolymerization	82/4092	218/17320	2.32854e-06	4.75448e-05	3.64941e-05	BAIAP2L1/TMSB10/ARHGAP6/LIMA1/TTC17/CYFIP2/NCKAP1/CTNNA2/RHOA/PFN2/WDR1/DLG1/CAPZB/SSH1/ADD1/COTL1/MTPN/WASL/KANK1/PFN1/PPP1R9B/WASF1/ACTR3/SPTBN1/CAPZA1/ABITRAM/VASP/MKKS/DSTN/CDC42EP1/SNX9/LATS1/CAP1/DIAPH1/ARFIP2/SWAP70/MICAL2/SPIRE1/RAC1/ABI1/TMOD1/RDX/ACTR2/ABI2/TMOD3/AP1AR/SSH2/ARF1/ARHGAP18/TWF1/FER/EPS8/PSTPIP2/JMY/CYRIB/ENAH/BAG4/WASF2/DMTN/ARHGAP35/ARPC5/CDC42EP3/ARPC2/ARFIP1/F2RL1/CFL2…	82
GO:0042594	GO:0042594	response to starvation	78/4092	205/17320	2.44814e-06	4.9824e-05	3.82435e-05	LAMP2/HFE/RRAGD/FAS/GABARAPL2/RIPOR1/HSPA5/EIF2AK2/ATG5/SREBF1/SESN1/SEH1L/EIF2AK1/TNRC6A/COMT/SIRT1/SH3GLB1/MAPK1/XBP1/STK24/DHODH/HNRNPL/PRKAG2/HSPA8/CBL/NFE2L2/RRAGC/SLC2A1/FOXO3/CDKN1A/MAX/BECN1/ATG14/ZFP36/ATF4/EIF2AK4/SESN2/TBC1D5/PPARG/PRKAA1/EIF2S1/SLC38A2/STK26/DSC2/HNRNPA1/GLUL/GABARAPL1/MAP1LC3B/TP53/RPTOR/FOXK2/WDR45B/PMAIP1/XPR1/EIF2A/SESN3/FADS1/FOXO1/KLF10/LARP1/RRAGA/WIPI2/ATF3/FS…	78
GO:0032786	GO:0032786	positive regulation of DNA-templated transcription, elongation	18/4092	27/17320	2.4913e-06	5.03646e-05	3.86585e-05	CDK13/CCNT2/CCNK/SUPT16H/THOC5/TCERG1/GTF2F1/CCNT1/EAPP/CDC73/KAT7/BRD4/ELOC/CDK12/SUPT5H/HMGN1/SCAF8/SUPT4H1	18
GO:1902175	GO:1902175	regulation of oxidative stress-induced intrinsic apoptotic signaling pathway	18/4092	27/17320	2.4913e-06	5.03646e-05	3.86585e-05	SIRT1/HIF1A/HSPB1/FBXW7/SOD2/NFE2L2/PARK7/UBQLN1/SOD1/AKT1/MCL1/PARP1/NONO/PINK1/BAG5/P4HB/GPX1/SFPQ	18
GO:0038061	GO:0038061	NIK/NF-kappaB signaling	66/4092	166/17320	2.50164e-06	5.03646e-05	3.86585e-05	TSPAN6/PSMA4/CUL1/EIF2AK2/RC3H2/RHOA/PSME4/FBXW11/TRIP6/AGO1/PSMD5/PSMD8/EP300/PPM1A/PSMB5/PSMA6/PSMA7/PSMD10/NFAT5/PSMD7/TNFRSF10A/PSMA2/PSMD3/PSMD11/BIRC2/SKP1/PSMD14/PRDX1/TNFRSF10B/PSMF1/RBCK1/PSMB2/AGO3/PSMA1/ACTN4/PSME3/MAP3K7/RC3H1/PSMB7/APP/AKT1/PSMA5/EGFR/RPS3/TIRAP/PDCD4/EDA/ADIPOR1/PSMC2/REL/TRIM44/PHB/LIMS1/RELA/CALR/IRAK1/ZFP91/LITAF/HMGB1/PSMD12/COPS8/CHUK/CPNE1/PHB2/DDX3X/DICER1	66
GO:0007249	GO:0007249	I-kappaB kinase/NF-kappaB signaling	100/4092	279/17320	2.50695e-06	5.03646e-05	3.86585e-05	TSPAN6/CFLAR/TAB2/TNFRSF1A/RHOA/TFRC/HACD3/ERC1/ZFAND6/FKBP1A/MAVS/MUL1/SIRT1/ABL1/PPM1A/VAPA/PIM2/NDFIP2/USP10/UBE2I/RIPK2/HSPB1/TRIM14/BIRC2/LTBR/GOLT1B/TFG/STAT1/HDAC1/ASH1L/WLS/TRIM32/NEK6/TNFRSF10B/TRIM25/WDR83/RBCK1/NR1D1/TICAM1/AJUBA/TRAF3/NDFIP1/TRIM5/ANKRD17/ROCK2/MAP3K7/TANK/PDPK1/BRD4/AKT1/BCL10/RPS27A/SLC20A1/TIFA/PLK2/MTDH/TIRAP/UBC/RHOC/SLC35B2/TAB3/TMED4/EDA/PINK1/SQSTM1/JMJD8/REL/…	100
GO:0098727	GO:0098727	maintenance of cell number	65/4092	163/17320	2.63576e-06	5.27827e-05	4.05145e-05	ELAVL1/SMC1A/RIF1/REST/KDM2B/POLR2E/MED15/POLR2C/SETD6/BMPR1A/DDX6/BCL9/ARID1A/MED28/FOXO3/ZNF706/ZC3H13/NCOA3/SOX4/CNOT1/SOX9/PAX8/LIF/RAF1/NOTCH2/CDC73/TUT4/TAF5L/KLF4/MYC/YAP1/RTF1/SS18/SMAD4/POLR2D/EPHA1/POLR2K/HMGA2/FOXO1/EIF4E/SAV1/ZFP36L2/MED21/KLF10/SKI/FANCC/WDR43/GNL3/NIPBL/CTNNB1/RBPJ/STAT3/TRIM8/FUT10/SMAD2/POLR2L/MED14/POLR2A/PBX1/BCL9L/CTR9/MTF2/METTL3/LSM1/ZNF322	65
GO:0010212	GO:0010212	response to ionizing radiation	59/4092	144/17320	2.70942e-06	5.40846e-05	4.15138e-05	HSPA5/KARS1/TP53BP1/NUCKS1/TIGAR/XRCC5/ZMPSTE24/BAX/SIRT1/NAMPT/CCND1/TMEM109/CBL/MAPK14/EGR1/CDKN1A/ELK1/PRKAA1/MEN1/CLOCK/ANXA1/MDM2/HUS1/TANK/MYC/YAP1/PML/TP53/PARP1/RHOB/TLK2/INIP/HMGA2/XRCC4/PAXIP1/EYA3/MRNIP/RPL26/LZIC/ABRAXAS1/RNF168/NIPBL/SPIDR/WRN/IKBIP/XRRA1/BCL2L1/RAD9A/NET1/GRB2/AEN/HSF1/NHEJ1/DCUN1D3/H2AX/XRCC6/TRIM13/GPX1/DCLRE1C	59
GO:0006354	GO:0006354	DNA-templated transcription, elongation	50/4092	116/17320	2.72952e-06	5.41957e-05	4.15991e-05	ELOA/CDK13/POLR1A/AFF4/CCNT2/CCNK/SUPT16H/POLR2E/THOC5/NELFCD/POLR2C/POLR1F/GTF2H3/TCERG1/NCBP2/ELL2/POLR1B/GTF2F1/CCNT1/EAPP/MLLT1/CDC73/KAT7/CDK9/RTF1/WDR61/BRD4/POLR2D/EAF1/POLR2K/SSRP1/HNRNPU/ELOC/CCAR2/WDR43/RNF168/TAF1D/CDK12/SETD5/POLR1C/POLR2L/POLR2A/SETD2/TCEA1/SUPT5H/LDB1/CTR9/HMGN1/SCAF8/SUPT4H1	50
GO:1903363	GO:1903363	negative regulation of cellular protein catabolic process	40/4092	86/17320	2.73234e-06	5.41957e-05	4.15991e-05	HFE/GABARAPL2/HIPK2/ERLEC1/VPS35/CSNK2A2/DERL2/SENP1/PSEN1/WAC/HSP90AB1/CSNK2A1/USP14/LAPTM4B/SGTA/RIC1/RGP1/PARK7/RPL5/RPL23/PSMF1/UBAC2/MARCHF7/SDCBP/ATRAID/PML/FURIN/RPL11/TLK2/CCAR2/ATP13A2/RYBP/CAMLG/BAG5/SMARCC1/ANXA2/UBE2G2/STYX/UBE2J1/TAF9	40
GO:0043393	GO:0043393	regulation of protein binding	79/4092	209/17320	2.84403e-06	5.62327e-05	4.31626e-05	HFE/HIPK2/BTBD1/CDC42/PRKACA/MARK2/ACTB/PSEN1/GSK3B/BAX/ADD1/FKBP1A/HSP90AB1/ABL1/TFIP11/EP300/STK4/ADNP/TRIB3/MAPRE1/PIM2/STUB1/RIPK2/STK3/PPP2CB/TLE5/CAV1/MET/TGFBR1/DKK1/BAG2/PPP2CA/EPB41L5/PARK7/STMN1/CDKN1A/BMP4/GTF2F1/ID1/TICAM1/GNL3L/RAN/MEN1/EIF2S1/DERL1/ARRB1/TMBIM6/ARRB2/APP/AKT1/CARM1/RPL11/PTPRF/SNAPIN/PLK2/TCF7L2/TIAM1/SPPL3/LDLRAP1/EPB41/AMFR/SENP2/PCBD1/B2M/CRK/NMD3/PPP1CA/ATP2A2/B…	79
GO:0044774	GO:0044774	mitotic DNA integrity checkpoint	47/4092	107/17320	2.85534e-06	5.62781e-05	4.31975e-05	FOXN3/CNOT4/BAX/PCBP4/EP300/FBXO31/NBN/CASP2/CCND1/CNOT6/TFDP2/ATF2/ARID3A/PLAGL1/CDKN1A/SOX4/CNOT1/PRMT1/TAOK3/MDM2/HUS1/CNOT6L/PML/TP53/CARM1/CNOT9/PLK2/HMGA2/RAD17/EME1/CNOT8/CNOT11/DONSON/BTG2/TAOK1/MRNIP/ZNF385A/RPL26/E2F7/TRIAP1/RAD9A/RPS27L/TFDP1/MDM4/CNOT7/GIGYF2/E2F4	47
GO:0071156	GO:0071156	regulation of cell cycle arrest	46/4092	104/17320	2.87808e-06	5.6548e-05	4.34047e-05	PRKACA/CNOT4/BAX/PCBP4/ZNF268/HSP90AB1/EP300/MED25/AKT2/CASP2/CCND1/CNOT6/TFDP2/ID2/ARID3A/PLAGL1/CDKN1A/SOX4/CNOT1/RPL23/PRMT1/CDK4/MDM2/CDK9/CNOT6L/PML/TP53/CARM1/SDE2/CNOT9/PLK2/HMGA2/CNOT8/CNOT11/BTG2/ZNF385A/RPL26/E2F7/TRIAP1/SLC25A33/CRLF3/CALR/TFDP1/MDM4/CNOT7/E2F4	46
GO:0009132	GO:0009132	nucleoside diphosphate metabolic process	62/4092	154/17320	3.06424e-06	6.00169e-05	4.60673e-05	AK2/NDC1/PKM/ENO1/DLG1/TIGAR/PGM1/PSEN1/MAGI3/SEH1L/NUP50/EP300/HIF1A/PGK1/NME4/GPI/PRKAG2/NUP88/NUP98/GAPDH/TPI1/NUP155/NUP43/NUP153/CBFA2T3/PRKAA1/LDHA/NUP54/NUP58/NCOR1/FOXK2/APP/ARNT/CASK/AK3/ALDOA/DLG2/PFKM/RANBP2/ADPGK/HK2/JMJD8/CMPK1/AK4/FOXK1/NUDT5/STAT3/PFKFB3/INSR/PGAM1/ZBTB7A/ZBTB20/PRKAG1/PPARA/ENO4/POM121/ENTPD4/NUP62/NME1/EIF6/NME2/POM121C	62
GO:0032970	GO:0032970	regulation of actin filament-based process	132/4092	392/17320	3.33086e-06	6.50351e-05	4.99191e-05	BAIAP2L1/TMSB10/DSG2/ARHGAP6/LIMA1/CYFIP2/NCKAP1/CNN2/CTNNA2/RHOA/PFN2/CDC42/WDR1/CLASP1/FSCN1/DLG1/CAPZB/SSH1/ADD1/PXN/DSP/ABL1/MYH9/COTL1/TJP1/MTPN/CAV1/MET/WASL/LIMK1/TGFBR1/KANK1/PFN1/WASF1/ACTR3/SPTBN1/RND3/SUMO1/ALMS1/CAPZA1/STMN1/ABITRAM/RHOQ/SDC4/VASP/MKKS/DSTN/ID1/CDC42EP1/RAC2/SNX9/LATS1/ARFIP2/SWAP70/NOTCH2/SPIRE1/ROCK2/DSC2/RAC1/TMOD1/RDX/ACTR2/ABI2/TMOD3/AP1AR/RHOF/FRMD6/ARHGAP17/SSH…	132
GO:0031503	GO:0031503	protein-containing complex localization	103/4092	291/17320	3.41365e-06	6.64438e-05	5.10004e-05	FKBP4/AP2B1/IFT88/ZC3H11A/NDC1/U2AF2/AP3D1/VPS35/DLG1/XPO1/TNPO1/YTHDC1/SEH1L/DYNLL1/ALKBH5/EZR/NUP50/POLDIP3/THOC5/TRIP11/PABPN1/KIF3B/RAB11A/WASL/CASC3/NUP88/USP46/NUP98/SRSF9/SRSF3/CILK1/NUP155/NCBP2/SRSF7/RAP1A/SMG7/SRSF11/SSX2IP/NUP43/FYTTD1/HNRNPA2B1/SRSF6/NUP153/DYNLRB1/HIP1/RAN/EIF5A/TERF2/SRRM1/NUMB/SRSF1/WDR33/ADAM10/ATAD1/NUP54/NUP58/EIF4A3/SNAPIN/POLR2D/NACC2/DLG2/EIF4E/HNRNPU/RANBP2/…	103
GO:0061912	GO:0061912	selective autophagy	31/4092	61/17320	3.59822e-06	6.98188e-05	5.3591e-05	ATG5/RAB7A/TIGAR/HUWE1/SPTLC1/SPTLC2/RIPK2/CDC37/MFN2/LGALS8/BECN1/ATG14/SESN2/UBQLN1/CALCOCO2/MAP1LC3B/TP53/RETREG3/BAG3/HSPB8/WIPI2/PINK1/SQSTM1/WDFY3/TEX264/ATG13/RNF41/SMURF1/PHB2/RB1CC1/UFC1	31
GO:2000736	GO:2000736	regulation of stem cell differentiation	50/4092	117/17320	3.68148e-06	7.12133e-05	5.46613e-05	PSMA4/FOXC1/EIF2AK2/CDK13/CBFB/PSME4/TCF3/TEAD2/ITCH/REST/PSMD5/ABL1/PSMD8/SETD1A/PSMB5/PSMA6/PSMA7/PSMD10/PSMD7/CDK6/PSMA2/PSMD3/PSMD11/OCIAD1/HSPA9/PSMD14/NFE2L2/KMT2A/BMP4/SOX9/PSMF1/PSMB2/PSMA1/PSME3/PWP1/PSMB7/YAP1/TCF12/PSMA5/ZFP36L2/HNRNPU/RUNX1/PSMC2/NUDT21/CDK12/STAT3/PSMD12/YTHDF2/LDB1/METTL3	50
GO:0043687	GO:0043687	post-translational protein modification	123/4092	361/17320	3.70603e-06	7.14668e-05	5.48559e-05	FBXL3/CUL3/VCAN/PSMA4/DCUN1D1/RCN1/CUL1/ATG5/BTBD1/ASB1/PSME4/FBXW11/KLHL20/APLP2/KLHL42/PSMD5/PSMD8/FBXO7/HIF1A/PSMB5/PSMA6/PSMA7/CST3/PSMD10/RBBP7/DNAJC3/PSMD7/FBXO31/RAB11A/RAB2A/NUCB1/RAB3A/PSMA2/FBXL20/PSMD3/PSMD11/FBXW7/CAND1/COPS7A/FBXL4/SKP1/STC2/RNF7/TTL/PSMD14/ASB3/EPAS1/ICMT/RBBP5/FBXO30/FBXL5/FBXW2/DCAF10/RAB38/BMP4/PSMF1/PSMB2/KTN1/CALU/PSMA1/SUMF2/NEDD8/PRKCSH/TULP4/PSME3/MEN1/VHL/S…	123
GO:0034063	GO:0034063	stress granule assembly	16/4092	23/17320	3.93099e-06	7.55717e-05	5.80067e-05	CSDE1/PUM2/OGFOD1/DDX6/PRRC2C/PRKAA1/EIF2S1/G3BP2/UBAP2L/G3BP1/ATXN2L/RPS23/MAPT/ATXN2/DDX3X/LSM14A	16
GO:0061614	GO:0061614	pri-miRNA transcription by RNA polymerase II	28/4092	53/17320	3.97496e-06	7.61826e-05	5.84756e-05	SREBF1/NFATC3/HIF1A/YY1/KLF5/TGFB1/BMPR1A/DDX5/SRF/NR3C1/FOXO3/EGR1/BMP4/SOX9/PPARG/KLF4/TP53/SMAD4/GNL3/SMAD3/STAT3/SMAD1/RELA/FOSL1/PPARA/TEAD1/SREBF2/NFIB	28
GO:0009135	GO:0009135	purine nucleoside diphosphate metabolic process	56/4092	136/17320	4.00725e-06	7.63332e-05	5.85912e-05	AK2/NDC1/PKM/ENO1/DLG1/TIGAR/PGM1/PSEN1/MAGI3/SEH1L/NUP50/EP300/HIF1A/PGK1/GPI/PRKAG2/NUP88/NUP98/GAPDH/TPI1/NUP155/NUP43/NUP153/CBFA2T3/PRKAA1/LDHA/NUP54/NUP58/NCOR1/FOXK2/APP/ARNT/CASK/AK3/ALDOA/DLG2/PFKM/RANBP2/ADPGK/HK2/JMJD8/AK4/FOXK1/STAT3/PFKFB3/INSR/PGAM1/ZBTB7A/ZBTB20/PRKAG1/PPARA/ENO4/POM121/NUP62/EIF6/POM121C	56
GO:0009179	GO:0009179	purine ribonucleoside diphosphate metabolic process	56/4092	136/17320	4.00725e-06	7.63332e-05	5.85912e-05	AK2/NDC1/PKM/ENO1/DLG1/TIGAR/PGM1/PSEN1/MAGI3/SEH1L/NUP50/EP300/HIF1A/PGK1/GPI/PRKAG2/NUP88/NUP98/GAPDH/TPI1/NUP155/NUP43/NUP153/CBFA2T3/PRKAA1/LDHA/NUP54/NUP58/NCOR1/FOXK2/APP/ARNT/CASK/AK3/ALDOA/DLG2/PFKM/RANBP2/ADPGK/HK2/JMJD8/AK4/FOXK1/STAT3/PFKFB3/INSR/PGAM1/ZBTB7A/ZBTB20/PRKAG1/PPARA/ENO4/POM121/NUP62/EIF6/POM121C	56
GO:0036498	GO:0036498	IRE1-mediated unfolded protein response	33/4092	67/17320	4.27679e-06	8.12201e-05	6.23423e-05	EXTL3/HSPA5/BAX/ADD1/KDELR3/XBP1/DNAJC3/BFAR/GSK3A/FKBP14/GOSR2/TMEM33/SERP1/VAPB/SSR1/SEC31A/HDGF/PDIA6/SRPRB/HYOU1/BCL2L11/TATDN2/SHC1/LMNA/SYVN1/EXTL2/TPP1/CTDSP2/SRPRA/PTPN1/GFPT1/DNAJB9/ERN1	33
GO:0043001	GO:0043001	Golgi to plasma membrane protein transport	23/4092	40/17320	4.3467e-06	8.21679e-05	6.30698e-05	GOPC/VAMP3/NSF/RAB10/GGA2/GOLPH3/SPTBN1/BLZF1/LYPLA1/ACSL3/VAMP7/BBS2/PREPL/GOLPH3L/GOLGA4/GOLGA7/SEC16A/CNST/RAB31/SYS1/RACK1/RSC1A1/VAMP2	23
GO:1903364	GO:1903364	positive regulation of cellular protein catabolic process	60/4092	149/17320	4.35301e-06	8.21679e-05	6.30698e-05	GCLC/RNF14/PIAS1/RNF19A/HERPUD1/ATXN3/VPS35/CHFR/PSEN1/HSP90AA1/GSK3B/EZR/TRIB3/PSMD10/STUB1/SGTA/GSK3A/CAV1/FBXW7/CD81/BAG2/CSNK1A1/SUMO1/NFE2L2/FBXL5/CBFA2T3/LDLR/UBQLN1/MDM2/RDX/RNF185/TMTC3/CSNK1D/AKT1/VGLL4/PLK2/RNF217/MSN/ZER1/PSMC2/ZYG11B/RCHY1/VCP/ARIH1/FBXO22/PTK2/RNF139/PTEN/TRIB1/FBXW8/ARIH2/SOCS4/TMEM259/PTTG1IP/BCAP31/UBQLN2/SUMO2/SMURF1/RACK1/CSNK1E	60
GO:0002183	GO:0002183	cytoplasmic translational initiation	21/4092	35/17320	4.46254e-06	8.39548e-05	6.44414e-05	EIF4B/EIF3L/EIF3D/EIF5/EIF3J/EIF3E/EIF3B/EIF4H/EIF3A/EIF4G1/EIF2S2/EIF2S3/RPL13A/EIF3H/EIF4A2/EIF4A1/RBM4/EIF3F/EIF2S3B/YTHDF2/METTL3	21
GO:0006367	GO:0006367	transcription initiation from RNA polymerase II promoter	72/4092	188/17320	4.47454e-06	8.39548e-05	6.44414e-05	CREBBP/WWTR1/TAF2/CBFB/TEAD2/BAX/POLR2E/MED15/POLR2C/MED25/TAF6/MED13/CCND1/GTF2H3/CAND1/ZNF451/E2F3/SRF/SUB1/NR3C1/DR1/NR4A1/MED20/CDKN1A/SOX9/GTF2F1/MED1/NR1D1/TAF4/TRIM28/RARA/PPARG/CDK8/NOTCH2/CDK4/CDK9/YAP1/GTF2A2/TAF4B/TP53/POLR2D/POLR2K/NRBF2/TAF5/NR4A2/GTF2E1/PAXIP1/MAML1/PSMC2/GTF2A1/TAF3/TAF10/RBPJ/MECP2/PPM1D/ATF7IP/PTEN/NR1D2/NR2F1/NR2C2/POLR2L/MED14/POLR2A/RXRA/PPARA/TEAD1/TAF9B/HMGB…	72
GO:0007029	GO:0007029	endoplasmic reticulum organization	34/4092	70/17320	4.56771e-06	8.54462e-05	6.55861e-05	SEC61A1/TRAM2/TRAM1/LMAN1/RAB10/RAB18/SGTA/CAV2/CCDC47/TMEM33/LPCAT3/CERT1/RTN4/RAB3GAP1/ESYT2/RAB3GAP2/ATL2/VAPB/RTN3/SMPD4/SEC31A/ESYT1/LNPK/SEC16A/REEP3/TMEM170A/TOR1AIP2/ARL6IP1/JAGN1/VCPIP1/ATL3/SHTN1/GET4/POLR2M	34
GO:0046031	GO:0046031	ADP metabolic process	52/4092	124/17320	4.64193e-06	8.65755e-05	6.64529e-05	AK2/NDC1/PKM/ENO1/TIGAR/PGM1/PSEN1/SEH1L/NUP50/EP300/HIF1A/PGK1/GPI/PRKAG2/NUP88/NUP98/GAPDH/TPI1/NUP155/NUP43/NUP153/CBFA2T3/PRKAA1/LDHA/NUP54/NUP58/NCOR1/FOXK2/APP/ARNT/AK3/ALDOA/PFKM/RANBP2/ADPGK/HK2/JMJD8/AK4/FOXK1/STAT3/PFKFB3/INSR/PGAM1/ZBTB7A/ZBTB20/PRKAG1/PPARA/ENO4/POM121/NUP62/EIF6/POM121C	52
GO:0033044	GO:0033044	regulation of chromosome organization	120/4092	352/17320	4.69872e-06	8.7337e-05	6.70374e-05	CDC27/KMT2E/JARID2/ZNF207/CUL3/PNKP/ATG5/WAPL/RNF4/SREBF1/XRCC5/RIF1/ZMPSTE24/HNRNPC/CDC23/SIRT1/SETD1A/MAPK1/CTCF/NBN/UBR5/TNKS2/ZNF451/VEGFA/CCT4/PARK7/KMT2A/UBE2B/SET/NEK6/YLPM1/TCP1/TENT4B/HNRNPA2B1/BECN1/LIF/PSMG2/GNL3L/TRIM28/DNMT1/DKC1/WBP2/H3-3B/TERF2/PPHLN1/APC/HNRNPA1/KAT7/CDK9/MYC/HMGA1/ARRB1/RTF1/RB1/WDR61/PML/GLYR1/TP53/SMAD4/BRD4/PARP1/CAMK2D/SETD7/NAF1/CCT6A/TLK2/HMBOX1/NSD3/MKI67/…	120
GO:0043122	GO:0043122	regulation of I-kappaB kinase/NF-kappaB signaling	89/4092	245/17320	4.71072e-06	8.7337e-05	6.70374e-05	TSPAN6/CFLAR/TAB2/TNFRSF1A/RHOA/TFRC/ZFAND6/FKBP1A/MAVS/MUL1/SIRT1/ABL1/PPM1A/VAPA/PIM2/NDFIP2/USP10/UBE2I/RIPK2/HSPB1/TRIM14/BIRC2/LTBR/GOLT1B/TFG/STAT1/HDAC1/ASH1L/WLS/TRIM32/NEK6/TNFRSF10B/TRIM25/WDR83/RBCK1/NR1D1/TICAM1/AJUBA/TRAF3/NDFIP1/TRIM5/ANKRD17/MAP3K7/TANK/PDPK1/BRD4/AKT1/BCL10/SLC20A1/TIFA/PLK2/MTDH/TIRAP/RHOC/SLC35B2/TAB3/TMED4/EDA/PINK1/SQSTM1/JMJD8/REL/SHISA5/F2RL1/DDX21/CTNNB1/TR…	89
GO:0034660	GO:0034660	ncRNA metabolic process	157/4092	484/17320	4.8371e-06	8.94148e-05	6.86323e-05	SARS1/USP36/RC3H2/KARS1/THUMPD1/RRP15/RBM7/DIS3/WBP11/DIMT1/RTRAF/METTL2A/DDX18/KHSRP/XRN2/AARS1/AGO1/SNU13/DDX17/NOP56/PIN4/USB1/EARS2/DTWD1/ERI1/RPS16/RPS19/GARS1/PTCD1/GTPBP4/NFKB1/KRR1/MDN1/TENT4A/DARS1/FARSB/RPF1/ZNHIT6/NSUN4/UTP25/HEATR1/FCF1/RCL1/WDR55/TENT4B/RPL5/HNRNPA2B1/MRM2/METTL8/AGO2/RRP36/XPO5/AGO3/SBDS/EMG1/METTL16/NSUN5/EXOSC2/DKC1/NOL11/RPL27/RAN/GRSF1/ELP3/THUMPD3/NARS1/YARS1/T…	157
GO:0061572	GO:0061572	actin filament bundle organization	62/4092	156/17320	5.04733e-06	9.29359e-05	7.1335e-05	BAIAP2L1/CUL3/ARHGAP6/LIMA1/RHOA/PFN2/CDC42/ACTN1/CLASP1/FSCN1/ADD1/PXN/EZR/ABL1/TJP1/MET/LIMK1/TGFBR1/PFN1/TNFAIP1/SRF/ALMS1/STMN1/PLS1/SDC4/MKKS/ID1/AIF1L/ACTN4/SWAP70/SPIRE1/ROCK2/RAC1/ARRB1/RDX/PHLDB2/PIK3R1/EPHA1/FAM171A1/EPS8/RHOC/BAG4/WASF2/F11R/DMTN/ZYX/HSP90B1/SMAD3/SH3PXD2B/PAWR/RFLNA/PAK2/ACTG1/NF2/SHTN1/FLNA/SRC/SHANK3/MARCKS/ADD2/MICAL1/CD47	62
GO:0006096	GO:0006096	glycolytic process	49/4092	115/17320	5.06923e-06	9.29359e-05	7.1335e-05	NDC1/PKM/ENO1/TIGAR/PGM1/PSEN1/SEH1L/NUP50/EP300/HIF1A/PGK1/GPI/PRKAG2/NUP88/NUP98/GAPDH/TPI1/NUP155/NUP43/NUP153/CBFA2T3/PRKAA1/LDHA/NUP54/NUP58/NCOR1/FOXK2/APP/ARNT/ALDOA/PFKM/RANBP2/ADPGK/HK2/JMJD8/FOXK1/STAT3/PFKFB3/INSR/PGAM1/ZBTB7A/ZBTB20/PRKAG1/PPARA/ENO4/POM121/NUP62/EIF6/POM121C	49
GO:2001252	GO:2001252	positive regulation of chromosome organization	70/4092	182/17320	5.0722e-06	9.29359e-05	7.1335e-05	CDC27/KMT2E/JARID2/CUL3/PNKP/SREBF1/XRCC5/RIF1/CDC23/SIRT1/MAPK1/NBN/TNKS2/VEGFA/CCT4/KMT2A/TCP1/HNRNPA2B1/BECN1/LIF/TRIM28/DNMT1/DKC1/WBP2/PPHLN1/HNRNPA1/KAT7/CDK9/ARRB1/RTF1/RB1/WDR61/PML/GLYR1/TP53/SMAD4/BRD4/NAF1/CCT6A/HMBOX1/NSD3/CCT5/NEK7/HNRNPU/CCT8/PAXIP1/PINK1/CTBP1/CHTOP/LMNA/CCT3/GNL3/NIPBL/RAD21/BRD7/CCT2/CTNNB1/MECP2/SIN3A/ATF7IP/TNKS/RESF1/UBE2N/MIER1/C6orf89/CTR9/RPS6KA5/SFPQ/MTF2/…	70
GO:0071158	GO:0071158	positive regulation of cell cycle arrest	37/4092	79/17320	5.2206e-06	9.5097e-05	7.29938e-05	PRKACA/CNOT4/BAX/PCBP4/EP300/MED25/CASP2/CNOT6/TFDP2/ID2/ARID3A/PLAGL1/CDKN1A/SOX4/CNOT1/RPL23/PRMT1/MDM2/CNOT6L/PML/TP53/CARM1/CNOT9/PLK2/HMGA2/CNOT8/CNOT11/BTG2/ZNF385A/RPL26/E2F7/TRIAP1/CRLF3/TFDP1/MDM4/CNOT7/E2F4	37
GO:1900407	GO:1900407	regulation of cellular response to oxidative stress	37/4092	79/17320	5.2206e-06	9.5097e-05	7.29938e-05	FUT8/REST/SIRT1/FBXO7/HIF1A/MET/HSPB1/FBXW7/SOD2/LANCL1/NFE2L2/PARK7/FOXO3/MAPKAP1/ATF4/STK26/UBQLN1/TXN/SIRT3/SOD1/AKT1/MCL1/PARP1/NONO/SLC7A11/PINK1/OXR1/BAG5/CTNNB1/PAWR/PYCR1/P4HB/ATG7/PSAP/RACK1/GPX1/SFPQ	37
GO:0000302	GO:0000302	response to reactive oxygen species	82/4092	222/17320	5.28585e-06	9.60058e-05	7.36913e-05	CFLAR/GLRX2/SESN1/PXN/SIRT1/ABL1/MAPK1/APEX1/CST3/STK24/PPP2CB/MET/SETX/PLEKHA1/PPIF/AREG/CAMKK2/SOD2/UBE3A/PDCD10/STAT1/SDC1/NFE2L2/PARK7/PRDX1/FOXO3/SESN2/PRKAA1/KDM6B/LDHA/STK26/ANXA1/MDM2/EGLN1/NUDT15/TRA2B/TXN/KLF4/APTX/SIRT3/SOD1/AKT1/RHOB/HSPD1/EGFR/SIGMAR1/SESN3/RPS3/FOXO1/FER/PTPRK/PPARGC1B/MAPK13/FANCC/PPP1R15B/PINK1/CAPN2/PRDX3/CRK/AXL/EEF2/ADAM9/RELA/NET1/FOSL1/PAWR/NQO1/ERCC6L2/PYCR1…	82
GO:0000470	GO:0000470	maturation of LSU-rRNA	18/4092	28/17320	5.43124e-06	9.83605e-05	7.54987e-05	RRP15/DDX18/SNU13/GTPBP4/RPF1/ZNHIT6/RPL35/WDR12/RPL7L1/NIFK/NOL9/NSA2/RSL1D1/RPF2/MAK16/RPL10A/EIF6/ZNHIT3	18
GO:0046939	GO:0046939	nucleotide phosphorylation	55/4092	134/17320	5.45958e-06	9.85189e-05	7.56203e-05	PNKP/NDC1/PKM/ENO1/TIGAR/PGM1/PSEN1/SEH1L/NUP50/EP300/HIF1A/PGK1/NME4/GPI/PRKAG2/NUP88/NUP98/GAPDH/TPI1/NUP155/NUP43/NUP153/CBFA2T3/PRKAA1/LDHA/NUP54/NUP58/NCOR1/FOXK2/APP/ARNT/ALDOA/PFKM/RANBP2/ADPGK/HK2/JMJD8/CMPK1/AK4/FOXK1/STAT3/PFKFB3/INSR/PGAM1/ZBTB7A/ZBTB20/PRKAG1/PPARA/ENO4/POM121/NUP62/NME1/EIF6/NME2/POM121C	55
GO:0032092	GO:0032092	positive regulation of protein binding	39/4092	85/17320	5.47152e-06	9.85189e-05	7.56203e-05	HFE/HIPK2/PSEN1/GSK3B/ADD1/FKBP1A/HSP90AB1/ABL1/EP300/STK4/TRIB3/MAPRE1/RIPK2/STK3/PPP2CB/CAV1/PPP2CA/EPB41L5/BMP4/TICAM1/RAN/MEN1/DERL1/ARRB1/APP/RPL11/PLK2/TCF7L2/TIAM1/SPPL3/EPB41/AMFR/B2M/NMD3/BDNF/ANXA2/HSF1/ADD2/IDE	39
GO:0008631	GO:0008631	intrinsic apoptotic signaling pathway in response to oxidative stress	24/4092	43/17320	5.50552e-06	9.88462e-05	7.58716e-05	SIRT1/HIF1A/GSKIP/STK24/HSPB1/FBXW7/SOD2/PDCD10/NFE2L2/PARK7/UBQLN1/PML/SOD1/AKT1/MCL1/PARP1/ARL6IP5/NONO/PINK1/BAG5/DIABLO/P4HB/GPX1/SFPQ	24
GO:0034470	GO:0034470	ncRNA processing	131/4092	392/17320	5.6055e-06	0.000100353	7.7028e-05	SARS1/USP36/KARS1/THUMPD1/RRP15/DIS3/WBP11/DIMT1/RTRAF/METTL2A/DDX18/XRN2/AARS1/AGO1/SNU13/DDX17/NOP56/PIN4/USB1/DTWD1/ERI1/RPS16/RPS19/PTCD1/GTPBP4/KRR1/MDN1/TENT4A/RPF1/ZNHIT6/NSUN4/UTP25/HEATR1/FCF1/RCL1/WDR55/TENT4B/RPL5/HNRNPA2B1/MRM2/METTL8/AGO2/RRP36/AGO3/SBDS/EMG1/METTL16/NSUN5/EXOSC2/DKC1/NOL11/RPL27/GRSF1/ELP3/THUMPD3/TUT4/WDR36/C2orf49/IMP4/TEX10/RPL35/RPS6/RPS24/WDR12/INTS14/RPS2/UTP4…	131
GO:1905898	GO:1905898	positive regulation of response to endoplasmic reticulum stress	22/4092	38/17320	6.02082e-06	0.00010748	8.24988e-05	HERPUD1/ATXN3/BAX/SIRT1/XBP1/SGTA/CAV1/TMEM33/NFE2L2/ATF6/SERINC3/UBQLN1/RNF185/PMAIP1/PIK3R1/BCL2L11/PTPN2/TMEM259/BCAP31/UBQLN2/PTPN1/ERN1	22
GO:0000289	GO:0000289	nuclear-transcribed mRNA poly(A) tail shortening	20/4092	33/17320	6.08258e-06	0.000108109	8.29816e-05	PABPC1/CNOT4/TNRC6A/TNRC6B/TENT4A/CNOT6/TENT4B/AGO2/CNOT1/ZFP36/TUT4/CNOT6L/TOB1/CNOT9/PAN3/CNOT8/CNOT11/BTG2/SAMD4B/CNOT7	20
GO:0043467	GO:0043467	regulation of generation of precursor metabolites and energy	63/4092	160/17320	6.09066e-06	0.000108109	8.29816e-05	NDC1/RHOA/TIGAR/PSEN1/GSK3B/NOA1/SEH1L/NUP50/EP300/HIF1A/PGK1/AKT2/GSK3A/PRKAG2/PPIF/NUP88/NUP98/COX7A2/NUP155/PARK7/NUP43/NUP153/SLC25A23/DYRK2/CBFA2T3/SELENOS/PRKAA1/ISCU/NUP54/NUP58/NCOR1/TP53/APP/AKT1/ARNT/RANBP2/PINK1/JMJD8/AK4/VCP/STAT3/IRS1/PRELID1/PFKFB3/INSR/PGAM1/SLC25A33/PPP1CA/PPP1R3B/PDE12/ZBTB7A/PHLDA2/ZBTB20/PRKAG1/SHMT2/PPARA/POM121/NUP62/PPP1CB/PHB2/EIF6/POM121C/IDE	63
GO:0019079	GO:0019079	viral genome replication	52/4092	125/17320	6.13877e-06	0.000108576	8.33401e-05	KPNA6/EIF2AK2/ATG5/PKN2/NUCKS1/PABPC1/CDC42/HACD3/ATG16L1/MAVS/CCNK/SRPK1/VAPA/ZC3HAV1/DDX5/HSPA8/VAPB/STAU1/DEK/TBC1D20/APOBEC3F/EIF2AK4/ILF3/TRIM28/ROCK2/SRPK2/IFITM3/RAB5A/STOM/HMGA2/FBXL2/LARP1/CTBP1/ADAR/NFIA/VCP/PPIB/PHB/PCBP1/RESF1/PDE12/CTBP2/BANF1/TMEM39A/PARP10/IFITM2/PPIA/PCBP2/CNOT7/DDX3X/APOBEC3C/PPIE	52
GO:0070482	GO:0070482	response to oxygen levels	128/4092	382/17320	6.15173e-06	0.000108576	8.33401e-05	CFLAR/CREBBP/FAS/PSMA4/HIPK2/PKM/RHOA/PDK3/PSME4/ENO1/TIGAR/GNB1/PLOD1/REST/ALKBH5/PSMD5/SIRT1/PSMD8/EP300/HIF1A/PSMB5/PSMA6/PSMA7/TM9SF4/CST3/AHCY/PSMD10/PGK1/PSMD7/STUB1/NDRG1/BNIP3L/NAMPT/CAV1/PSMA2/PSMD3/PSMD11/BIRC2/CBL/SRF/VEGFA/SLC29A1/STC2/ATP6V1A/PSMD14/EPAS1/NFE2L2/SLC2A1/FOXO3/EGR1/WDR83/CDKN1A/PSMF1/PSMB2/HP1BP3/ATF4/PSMA1/AJUBA/CBFA2T3/ACTN4/PSME3/RAF1/PPARG/PRKAA1/VHL/ROCK2/LDHA/UBQ…	128
GO:0043244	GO:0043244	regulation of protein-containing complex disassembly	51/4092	122/17320	6.3594e-06	0.000111925	8.59108e-05	LIMA1/WDR1/CLASP1/CAPZB/ZMPSTE24/OGFOD1/ADD1/MID1/GSPT1/MTPN/SETX/SPTBN1/CAPZA1/CAMSAP2/ETF1/DSTN/CAMSAP1/EIF5A/SWAP70/APC/CKAP2/CALCOCO2/TMOD1/RDX/TMOD3/IGF1R/RUBCN/TWF1/EPS8/SCAF4/DMTN/TAOK1/UBQLN4/EIF5A2/ATXN7/F2RL1/MID1IP1/CFL2/BMERB1/INSR/CFL1/TMEM39A/SMCR8/ASPH/CAPZA2/IQANK1/SCAF8/EIF5AL1/ADD2/CRACD/TMOD2	51
GO:0051438	GO:0051438	regulation of ubiquitin-protein transferase activity	28/4092	54/17320	6.40054e-06	0.000112333	8.62237e-05	DCUN1D1/PSEN1/ABL1/TRIB3/STUB1/LIMK1/FBXW7/BAG2/SKP1/PARK7/RPL5/RPL23/RAB1A/ARRDC4/RPS2/RPL11/PINK1/BAG5/BMI1/FEM1B/PTEN/UBE2N/MAGEA2B/UBE2L3/DCUN1D3/MAGEA2/ARRDC3/MAD2L1	28
GO:0016239	GO:0016239	positive regulation of macroautophagy	33/4092	68/17320	6.43412e-06	0.000112606	8.64333e-05	GNAI3/SESN1/HUWE1/SPTLC1/WAC/SIRT1/SH3GLB1/SPTLC2/HIF1A/PIM2/RIPK2/BNIP3L/CDC37/RAB3GAP1/MFN2/RAB3GAP2/SESN2/MAP3K7/CALCOCO2/SESN3/PIP4K2A/BAG3/HSPB8/SCOC/LARP1/PINK1/PIP4K2C/PAFAH1B2/SMCR8/SUPT5H/SMURF1/TRIM13/PIP4K2B	33
GO:0006757	GO:0006757	ATP generation from ADP	49/4092	116/17320	6.78037e-06	0.000118061	9.06203e-05	NDC1/PKM/ENO1/TIGAR/PGM1/PSEN1/SEH1L/NUP50/EP300/HIF1A/PGK1/GPI/PRKAG2/NUP88/NUP98/GAPDH/TPI1/NUP155/NUP43/NUP153/CBFA2T3/PRKAA1/LDHA/NUP54/NUP58/NCOR1/FOXK2/APP/ARNT/ALDOA/PFKM/RANBP2/ADPGK/HK2/JMJD8/FOXK1/STAT3/PFKFB3/INSR/PGAM1/ZBTB7A/ZBTB20/PRKAG1/PPARA/ENO4/POM121/NUP62/EIF6/POM121C	49
GO:0070302	GO:0070302	regulation of stress-activated protein kinase signaling cascade	84/4092	230/17320	6.78359e-06	0.000118061	9.06203e-05	WNT16/MAP3K9/PAFAH1B1/SPAG9/FAS/EIF2AK2/HIPK2/KARS1/MAP2K4/CDC42/MAP4K4/MAP3K13/HACD3/SEMA3A/DLG1/ITCH/MAGI3/RNF13/ZMPSTE24/MECOM/DNAJA1/MUL1/EZR/MAPK1/MID1/RIPK2/STK3/FKTN/DKK1/DUSP3/HIPK3/LTBR/TPD52L1/VEGFA/HMGCR/PDCD10/PRDX1/RAP2A/PRMT1/KLHDC10/TRAF3/GPS2/MEN1/TAOK3/MAP3K7/MYC/SDCBP/MAP3K12/IGF1R/MARVELD3/NCOR1/MINK1/APP/AKT1/MAP3K21/ARL6IP5/EGFR/MFHAS1/RPS3/TIRAP/PDCD4/FOXO1/SH3RF1/TIAM1/XDH/…	84
GO:0033233	GO:0033233	regulation of protein sumoylation	17/4092	26/17320	7.11209e-06	0.000123434	9.47447e-05	PIAS1/RNF4/MUL1/UBE2I/ZMIZ1/PARK7/EGR1/UBA2/GNL3L/HMG20A/SAE1/ARNT/GNL3/CTNNB1/RELA/MAGEA2B/MAGEA2	17
GO:0007179	GO:0007179	transforming growth factor beta receptor signaling pathway	71/4092	187/17320	7.39295e-06	0.0001276	9.79421e-05	CREBBP/ITGA3/STRAP/FUT8/HSPA5/HIPK2/RHOA/PXN/GLG1/HSP90AB1/SIRT1/EP300/PPM1A/FERMT1/STUB1/TGFB1/CAV2/CAV1/TGFBR1/BMPR1A/ZMIZ1/MTMR4/SMURF2/CBL/ZNF451/SMAD5/ACVR1/GOT1/USP9X/ID1/TWSG1/SNX6/GDF15/MEN1/MAP3K7/TGFBRAP1/SDCBP/PML/FURIN/PDPK1/ARRB2/TP53/SMAD4/PARP1/RPS27A/PARD3/UBC/PTPRK/RNF111/SKI/F11R/ZYX/TGFBR2/CITED2/SPRED1/SMAD3/ADAM9/PTK2/UBB/SMAD1/CHST11/LEMD3/SMAD2/ZBTB7A/BCL9L/SRC/TRIM33/SPRED…	71
GO:0008064	GO:0008064	regulation of actin polymerization or depolymerization	71/4092	187/17320	7.39295e-06	0.0001276	9.79421e-05	BAIAP2L1/TMSB10/LIMA1/CYFIP2/NCKAP1/CTNNA2/RHOA/PFN2/WDR1/DLG1/CAPZB/SSH1/ADD1/COTL1/MTPN/WASL/KANK1/PFN1/WASF1/ACTR3/SPTBN1/CAPZA1/ABITRAM/VASP/MKKS/DSTN/CDC42EP1/SNX9/LATS1/ARFIP2/SWAP70/SPIRE1/TMOD1/RDX/ACTR2/ABI2/TMOD3/AP1AR/SSH2/ARF1/ARHGAP18/TWF1/FER/EPS8/JMY/CYRIB/BAG4/WASF2/DMTN/ARHGAP35/ARPC5/CDC42EP3/ARPC2/ARFIP1/F2RL1/CFL2/ARF6/CFL1/GRB2/MYADM/KIRREL1/GMFB/MYO1C/CAPZA2/IQANK1/ARPC1A/BR…	71
GO:0006165	GO:0006165	nucleoside diphosphate phosphorylation	54/4092	132/17320	7.43221e-06	0.000127924	9.81909e-05	NDC1/PKM/ENO1/TIGAR/PGM1/PSEN1/SEH1L/NUP50/EP300/HIF1A/PGK1/NME4/GPI/PRKAG2/NUP88/NUP98/GAPDH/TPI1/NUP155/NUP43/NUP153/CBFA2T3/PRKAA1/LDHA/NUP54/NUP58/NCOR1/FOXK2/APP/ARNT/ALDOA/PFKM/RANBP2/ADPGK/HK2/JMJD8/CMPK1/AK4/FOXK1/STAT3/PFKFB3/INSR/PGAM1/ZBTB7A/ZBTB20/PRKAG1/PPARA/ENO4/POM121/NUP62/NME1/EIF6/NME2/POM121C	54
GO:0043470	GO:0043470	regulation of carbohydrate catabolic process	40/4092	89/17320	7.78978e-06	0.00013371	0.000102632	NDC1/TIGAR/PSEN1/SEH1L/NUP50/EP300/HIF1A/GSK3A/PRKAG2/NUP88/NUP98/NUP155/NUP43/NUP153/CBFA2T3/PRKAA1/NUP54/SCARB2/NUP58/NCOR1/TP53/APP/ARNT/RANBP2/JMJD8/STAT3/PFKFB3/INSR/PGAM1/PPP1CA/PPP1R3B/ZBTB7A/ZBTB20/PRKAG1/PPARA/POM121/NUP62/PPP1CB/EIF6/POM121C	40
GO:0043624	GO:0043624	cellular protein complex disassembly	82/4092	224/17320	7.84002e-06	0.000134204	0.000103011	MRPS10/LIMA1/MRPL43/MRPS35/KIF2A/WDR1/NSF/CLASP1/CAPZB/OGFOD1/ADD1/MID1/GSPT1/MTPN/PPP1R9B/HSPA8/MTRF1L/MRPL18/MRPS30/MRPS27/MRPL3/SPTBN1/MRPL19/MRPL37/CAPZA1/STMN1/CAMSAP2/VPS4B/ETF1/MRPS7/DSTN/CAMSAP1/MRPS25/MRPL35/EIF5A/VPS4A/SWAP70/MICAL2/APC/CKAP2/TMOD1/MRPL50/MRPL15/RDX/TMOD3/SH3GL1/MRPL9/MRRF/MRPL49/TWF1/EPS8/CCSAP/OXA1L/DMTN/MRPL10/TAOK1/EIF5A2/ATXN7/ABCE1/F2RL1/MID1IP1/CFL2/BMERB1/MRPL58…	82
GO:0031398	GO:0031398	positive regulation of protein ubiquitination	50/4092	120/17320	8.70611e-06	0.000148622	0.000114078	MYCBP2/CUL3/DCUN1D1/HSPA5/UBE2D1/CHFR/HUWE1/FKBP1A/TRIB3/PSMD10/XIAP/NDFIP2/STUB1/RIPK2/GSK3A/CAV1/FBXW7/BIRC2/SKP1/UBE3A/TICAM1/NDFIP1/UBQLN1/MARCHF7/CDK9/DERL1/ARRB1/RAB1A/ARRDC4/RPS2/ARRB2/BCL10/PAXIP1/RNF111/PINK1/RCHY1/SENP2/BMI1/UBB/PTEN/UBE2N/PTTG1IP/MAGEA2B/UBE2L3/DCUN1D3/CTR9/DDX3X/PDCD6/MAGEA2/ARRDC3	50
GO:0032271	GO:0032271	regulation of protein polymerization	83/4092	228/17320	8.84243e-06	0.000150538	0.000115549	FKBP4/BAIAP2L1/TMSB10/CYFIP2/NCKAP1/CTNNA2/RHOA/PFN2/CLASP1/DLG1/CAPZB/HSP90AA1/SSH1/ADD1/ABL1/MAPRE1/COTL1/MTPN/MET/WASL/KANK1/PFN1/SLAIN2/WASF1/ACTR3/SPTBN1/CAPZA1/STMN1/CAMSAP2/ABITRAM/VASP/MKKS/CDC42EP1/SNX9/CAMSAP1/CLIP1/LATS1/ARFIP2/SPIRE1/RAC1/TMOD1/RDX/ACTR2/ABI2/TMOD3/AP1AR/SSH2/PRUNE1/ARF1/ARHGAP18/RPS3/TWF1/FER/EPS8/JMY/CYRIB/BAG4/DYRK1A/WASF2/PINK1/DMTN/ARPC5/CDC42EP3/ARPC2/ARFIP1/ARF…	83
GO:0051017	GO:0051017	actin filament bundle assembly	60/4092	152/17320	9.14658e-06	0.000155166	0.000119101	BAIAP2L1/CUL3/ARHGAP6/LIMA1/RHOA/PFN2/CDC42/ACTN1/CLASP1/FSCN1/ADD1/PXN/EZR/ABL1/TJP1/MET/LIMK1/TGFBR1/PFN1/TNFAIP1/SRF/ALMS1/STMN1/PLS1/SDC4/MKKS/ID1/AIF1L/ACTN4/SWAP70/SPIRE1/ROCK2/RAC1/ARRB1/RDX/PHLDB2/PIK3R1/EPHA1/FAM171A1/EPS8/RHOC/BAG4/WASF2/F11R/DMTN/ZYX/HSP90B1/SMAD3/SH3PXD2B/PAWR/PAK2/ACTG1/NF2/FLNA/SRC/SHANK3/MARCKS/ADD2/MICAL1/CD47	60
GO:0030832	GO:0030832	regulation of actin filament length	71/4092	188/17320	9.16395e-06	0.000155166	0.000119101	BAIAP2L1/TMSB10/LIMA1/CYFIP2/NCKAP1/CTNNA2/RHOA/PFN2/WDR1/DLG1/CAPZB/SSH1/ADD1/COTL1/MTPN/WASL/KANK1/PFN1/WASF1/ACTR3/SPTBN1/CAPZA1/ABITRAM/VASP/MKKS/DSTN/CDC42EP1/SNX9/LATS1/ARFIP2/SWAP70/SPIRE1/TMOD1/RDX/ACTR2/ABI2/TMOD3/AP1AR/SSH2/ARF1/ARHGAP18/TWF1/FER/EPS8/JMY/CYRIB/BAG4/WASF2/DMTN/ARHGAP35/ARPC5/CDC42EP3/ARPC2/ARFIP1/F2RL1/CFL2/ARF6/CFL1/GRB2/MYADM/KIRREL1/GMFB/MYO1C/CAPZA2/IQANK1/ARPC1A/BR…	71
GO:0072522	GO:0072522	purine-containing compound biosynthetic process	76/4092	205/17320	9.85759e-06	0.00016646	0.00012777	AK2/ELOVL5/ELOVL1/PKM/PDK3/ACSL4/ENO1/VPS9D1/PDPR/DLD/ACOT7/SCD/TECR/MTAP/SLC25A1/GMPR2/PRPS2/NME4/ACSBG1/TGFB1/IMPDH1/PRKAG2/ATP5F1B/ATP5PB/PANK3/ADCY7/AMD1/ACSL3/ATP5F1E/PANK2/PAICS/PPAT/PPT1/ACLY/PDHA1/NT5E/ATP5MC2/ADCY3/PARP1/SCD5/CBR4/PRPS1/AK3/HSD17B12/ALDOA/ATP5F1A/ATP5MC3/SLC35B2/PINK1/GART/ADCY9/AK4/GMPS/ELOVL7/PDP1/VCP/STAT3/FASN/ADORA2B/ELOVL6/PDP2/IMPDH2/PFAS/CYC1/SHMT2/ADA/PNP/HACD2/…	76
GO:0072401	GO:0072401	signal transduction involved in DNA integrity checkpoint	34/4092	72/17320	9.9552e-06	0.000167204	0.000128341	CNOT4/BAX/PCBP4/EP300/CASP2/PRPF19/CNOT6/TFDP2/ARID3A/PLAGL1/CDKN1A/SOX4/CNOT1/PRMT1/MDM2/CNOT6L/PML/TP53/CARM1/CNOT9/PLK2/CNOT8/CNOT11/BTG2/ZNF385A/RPL26/ABRAXAS1/E2F7/TRIAP1/TFDP1/MDM4/CNOT7/E2F4/CDC5L	34
GO:0072422	GO:0072422	signal transduction involved in DNA damage checkpoint	34/4092	72/17320	9.9552e-06	0.000167204	0.000128341	CNOT4/BAX/PCBP4/EP300/CASP2/PRPF19/CNOT6/TFDP2/ARID3A/PLAGL1/CDKN1A/SOX4/CNOT1/PRMT1/MDM2/CNOT6L/PML/TP53/CARM1/CNOT9/PLK2/CNOT8/CNOT11/BTG2/ZNF385A/RPL26/ABRAXAS1/E2F7/TRIAP1/TFDP1/MDM4/CNOT7/E2F4/CDC5L	34
GO:0051052	GO:0051052	regulation of DNA metabolic process	120/4092	357/17320	1.00313e-05	0.000168031	0.000128976	PNKP/FAM168A/TP53BP1/NUCKS1/TFRC/TIGAR/XRCC5/RIF1/HSP90AA1/ZMPSTE24/BAX/HNRNPC/HSP90AB1/SIRT1/MAPK1/TFIP11/PRMT5/PARP4/NBN/UBR5/TGFB1/GSK3A/TNKS2/NSD2/KMT5B/PTGES3/SUB1/KPNA1/CCT4/RLF/KMT2A/UBE2B/YLPM1/TCP1/TENT4B/ZRANB3/HNRNPA2B1/CYREN/USP9X/CDKN1A/DEK/AUNIP/GNL3L/TRIM28/DKC1/NDFIP1/PPARG/TERF2/RFC3/MEN1/MBD2/SPIRE1/HNRNPA1/KAT7/CDK9/KLF4/NIBAN2/MYC/ACTR2/PML/ARRB2/TP53/AKT1/PARP1/NAF1/EGFR/CCT6…	120
GO:2000060	GO:2000060	positive regulation of ubiquitin-dependent protein catabolic process	44/4092	102/17320	1.03255e-05	0.000172136	0.000132127	GCLC/RNF14/PIAS1/RNF19A/HERPUD1/CHFR/PSEN1/GSK3B/TRIB3/PSMD10/STUB1/SGTA/GSK3A/CAV1/FBXW7/CSNK1A1/SUMO1/NFE2L2/CBFA2T3/UBQLN1/MDM2/CSNK1D/AKT1/PLK2/RNF217/ZER1/ZYG11B/RCHY1/VCP/ARIH1/FBXO22/PTK2/RNF139/PTEN/TRIB1/FBXW8/ARIH2/SOCS4/BCAP31/UBQLN2/SUMO2/SMURF1/RACK1/CSNK1E	44
GO:0032147	GO:0032147	activation of protein kinase activity	112/4092	329/17320	1.03315e-05	0.000172136	0.000132127	MAP3K9/SPAG9/GPRC5A/MAP2K3/TAB2/EIF2AK2/WNK1/KARS1/MAP2K4/MAP4K4/PRKACA/MARK2/MAP3K13/HACD3/DLG1/PSEN1/ERP29/MUL1/OSBPL8/ABL1/CRKL/MAPK1/STK4/ADNP/RIPK2/STK3/TNFRSF10A/PRKAG2/TGFBR1/PRKAR1A/LAMTOR3/CD81/MAPK14/VEGFA/PRKAR2A/ACVR2B/PARK7/MAPKAP1/TNFRSF10B/ADCY7/BMP4/GDF15/TRAF7/RAF1/PRKAA1/TAOK3/MAP3K7/CAB39/TXN/ARRB1/RPLP1/ADCY3/DUSP5/DUSP6/MAP3K12/PDPK1/TOM1L1/MINK1/RPTOR/SOD1/AKT1/PRKACB/MAP3K2…	112
GO:0006368	GO:0006368	transcription elongation from RNA polymerase II promoter	39/4092	87/17320	1.08591e-05	0.000179967	0.000138138	ELOA/CDK13/AFF4/CCNT2/CCNK/SUPT16H/POLR2E/NELFCD/POLR2C/GTF2H3/TCERG1/NCBP2/ELL2/GTF2F1/CCNT1/EAPP/MLLT1/CDC73/CDK9/RTF1/WDR61/BRD4/POLR2D/EAF1/POLR2K/SSRP1/HNRNPU/ELOC/WDR43/RNF168/CDK12/POLR2L/POLR2A/SETD2/TCEA1/SUPT5H/LDB1/CTR9/SUPT4H1	39
GO:0032436	GO:0032436	positive regulation of proteasomal ubiquitin-dependent protein catabolic process	39/4092	87/17320	1.08591e-05	0.000179967	0.000138138	GCLC/RNF14/PIAS1/RNF19A/HERPUD1/CHFR/PSEN1/GSK3B/TRIB3/PSMD10/STUB1/SGTA/GSK3A/CAV1/CSNK1A1/SUMO1/NFE2L2/CBFA2T3/UBQLN1/MDM2/CSNK1D/AKT1/PLK2/RNF217/ZER1/ZYG11B/RCHY1/VCP/ARIH1/FBXO22/TRIB1/FBXW8/ARIH2/SOCS4/BCAP31/UBQLN2/SUMO2/RACK1/CSNK1E	39
GO:0002064	GO:0002064	epithelial cell development	80/4092	219/17320	1.1001e-05	0.000181837	0.000139573	PAFAH1B1/VCL/TNFRSF1A/FOSL2/TIGAR/GSK3B/FAT1/B4GALT1/ADD1/EZR/XBP1/HIF1A/CST3/FNDC3A/KLF5/TJP1/PTPRS/GSK3A/SIPA1L3/CDK6/MET/RHEB/SLC9A3R1/WNT5B/VEGFA/EPB41L5/SDC1/RAP1A/RAP2C/CDKN1A/BMP4/SOX9/TBC1D20/ID1/RAP1B/ATF4/PODXL/PALLD/RARA/RAB25/NOTCH2/ROCK2/IL6ST/CLOCK/VEZF1/TMOD1/YAP1/RDX/ABI2/SEC24B/FRMD6/PDPK1/SOD1/EPHA2/RAB13/WDPCP/MSN/SIDT2/MARVELD2/BMP6/F11R/F2RL1/FRS2/CTNNB1/FEM1B/CLIC4/FASN/ASXL…	80
GO:1903749	GO:1903749	positive regulation of establishment of protein localization to mitochondrion	29/4092	58/17320	1.11037e-05	0.000182568	0.000140134	BID/USP36/CSNK2A2/HUWE1/PPP1R13B/SH3GLB1/GSK3A/YWHAE/UBE2D3/FBXW7/TFDP2/YWHAH/RAC2/PRKAA1/YWHAQ/NMT1/TP53/PMAIP1/SAE1/PINK1/YWHAZ/YWHAB/YWHAG/ATG13/ARIH2/UBE2L3/TFDP1/SREBF2/PPP3R1	29
GO:2001244	GO:2001244	positive regulation of intrinsic apoptotic signaling pathway	29/4092	58/17320	1.11037e-05	0.000182568	0.000140134	BID/BCLAF1/BAX/SIRT1/CAV1/SLC9A3R1/FBXW7/PARK7/PLAGL2/BECN1/SERINC3/TP53/PMAIP1/SOD1/RPL11/MCL1/NACC2/RPS3/BCL2L11/RPL26/MSX1/UBB/BCL2L1/RAD9A/PTPN2/PRKRA/BCAP31/RACK1/SFPQ	29
GO:0019048	GO:0019048	modulation by virus of host process	18/4092	29/17320	1.11516e-05	0.000182874	0.000140369	EIF2AK2/HIPK2/PABPN1/KPNA3/KPNB1/KPNA1/VAPB/EIF2AK4/BCL2L11/RRAGA/INSR/BCL2L1/DAG1/KPNA2/RXRA/KPNA4/ATG7/PHB2	18
GO:0006891	GO:0006891	intra-Golgi vesicle-mediated transport	20/4092	34/17320	1.14911e-05	0.000187457	0.000143887	GABARAPL2/TRAPPC3/NSF/GOLGA3/VTI1B/GOSR2/GOSR1/COPZ1/COPA/COPB1/NAPG/VTI1A/TRAPPC10/COG5/RAB6A/COPB2/COG8/RAB6C/RAB6D/CUX1	20
GO:0046685	GO:0046685	response to arsenic-containing substance	20/4092	34/17320	1.14911e-05	0.000187457	0.000143887	GCLC/ABCC2/RNF4/GSTO2/FECH/CPOX/MKNK2/ZFAND1/PPIF/CDKN1A/ATF4/SLC38A2/HNRNPA1/MAPK13/ATF3/VCP/PTEN/RBM4/HSF1/DDX3X	20
GO:0043409	GO:0043409	negative regulation of MAPK cascade	64/4092	166/17320	1.1538e-05	0.000187733	0.000144098	PAFAH1B1/RANBP9/DLG1/ITCH/MECOM/DNAJA1/EZR/ABL1/PSMD10/PPP2R1A/PIK3R2/CAV1/FKTN/EIF3A/DUSP3/SLC9A3R1/HIPK3/SH2B3/DUSP16/STK38/HMGCR/PPP2CA/ERRFI1/ASH1L/DUSP4/BMP4/LIF/GPS2/MEN1/TAOK3/KLF4/MYC/ARRB1/DUSP5/DUSP6/IGF1R/MARVELD3/NCOR1/SMAD4/SIRT3/AKT1/PDCD4/FOXO1/PINK1/ATF3/PAQR3/DUSP7/F2RL1/SPRED1/PHB/PTEN/DAG1/PTPN2/AIDA/NF2/SPRY4/PTPN1/NF1/SPRED2/NUP62/SYNJ2BP/LYN/DUSP14/RNF149	64
GO:0031668	GO:0031668	cellular response to extracellular stimulus	89/4092	250/17320	1.18404e-05	0.000192153	0.000147492	LAMP2/HFE/CYP24A1/GLRX2/RRAGD/FAS/GABARAPL2/RIPOR1/HSPA5/EIF2AK2/ATG5/ATP2B1/SREBF1/SESN1/SEH1L/TNRC6A/ITGA6/COMT/SIRT1/SH3GLB1/MAPK1/XBP1/ADNP/STK24/HNRNPL/TLE5/NAMPT/PRKAG2/PPP1R9B/HSPA8/CBL/SRF/EIF4G1/NFE2L2/RRAGC/SLC2A1/FOXO3/CDKN1A/MED1/MAX/BECN1/ATG14/ATF4/EIF2AK4/SESN2/PPARG/PRKAA1/EIF2S1/SLC38A2/STK26/DSC2/HNRNPA1/MDM2/GLUL/NUDT15/GABARAPL1/MAP1LC3B/TP53/RPTOR/WDR45B/PMAIP1/XPR1/SESN3/FAD…	89
GO:0070671	GO:0070671	response to interleukin-12	26/4092	50/17320	1.27431e-05	0.000206266	0.000158324	RALA/CNN2/CDC42/RPLP0/MTAP/RIPK2/SOD2/HSPA9/CAPZA1/TCP1/HNRNPA2B1/RAP1B/SOD1/ARF1/MSN/PDCD4/HNRNPDL/JAK1/HNRNPF/CFL1/PITPNA/PAK2/ANXA2/P4HB/PPIA/CD47	26
GO:0042255	GO:0042255	ribosome assembly	31/4092	64/17320	1.2778e-05	0.000206297	0.000158348	XRCC5/RPS5/RPL6/RPLP0/RPL3/RPS19/C1QBP/MDN1/NSUN4/RPL5/MRPS7/SBDS/TRAF7/NIP7/RPL11/EIF2A/ABT1/RPL10/RPS14/RPSA/RPL38/NPM1/RPS27L/RPF2/RPL12/RPL23A/DDX3X/RPS28/EIF6/MPV17L2/RSL24D1	31
GO:0031570	GO:0031570	DNA integrity checkpoint	62/4092	160/17320	1.30371e-05	0.000209937	0.000161142	FOXN3/TP53BP1/CNOT4/BAX/PCBP4/WAC/THOC5/EP300/FBXO31/NBN/CASP2/CCND1/PRPF19/MAPK14/CNOT6/TFDP2/ATF2/ARID3A/PLAGL1/CDKN1A/SOX4/CNOT1/PRMT1/EIF2AK4/CLOCK/TAOK3/MDM2/HUS1/CNOT6L/PML/TP53/CARM1/TIPRL/CNOT9/PLK2/HMGA2/RAD17/EME1/CNOT8/CNOT11/CCAR2/DONSON/BTG2/TAOK1/MRNIP/ZNF385A/RPL26/PEA15/ABRAXAS1/E2F7/FEM1B/TRIAP1/RAD9A/PTPN11/RPS27L/H2AX/TFDP1/MDM4/CNOT7/GIGYF2/E2F4/CDC5L	62
GO:0097191	GO:0097191	extrinsic apoptotic signaling pathway	82/4092	227/17320	1.38965e-05	0.000223201	0.000171323	GCLC/CFLAR/TNFRSF12A/BID/FAS/CTNNA1/KITLG/TNFRSF1A/GSK3B/BAX/ITGA6/RFFL/MKNK2/STK4/STK3/TNFRSF10A/TGFB1/PPP2R1A/GSK3A/CAV1/CASP2/TGFBR1/UNC5B/LTBR/ACVR1/BIRC6/PARK7/FOXO3/TNFRSF10B/BCL2L14/BMP4/RBCK1/PSME3/RAF1/ACVR1B/ITM2C/TMBIM1/YAP1/PPP2R1B/PML/PDPK1/PMAIP1/AKT1/BCL10/MCL1/PIK3R1/TCF7L2/BAG3/BCL2L11/SH3RF1/EYA3/DEDD2/LMNA/PEA15/ATF3/HIPK1/ZDHHC3/SMAD3/FEM1B/GABARAP/KRT8/RNF34/BCL2L1/PTEN/PPP1C…	82
GO:0071214	GO:0071214	cellular response to abiotic stimulus	112/4092	331/17320	1.40341e-05	0.000224258	0.000172134	GCLC/CREBBP/FAS/HSPA5/OPN3/YBX3/CNN2/MAP2K4/TNFRSF1A/TP53BP1/NUCKS1/GNB1/XRCC5/ZMPSTE24/REST/BAX/GNA11/SIRT1/EP300/YY1/PIEZO1/TNFRSF10A/AKT2/NAMPT/MTPN/CASP2/NFKB1/TMEM109/METAP2/LTBR/MAPK14/ERRFI1/RPE65/SLC2A1/GOT1/EGR1/TNFRSF10B/CDKN1A/SOX9/SLC25A23/ELK1/ATF4/EIF2AK4/PDE6A/EIF2S1/SLC38A2/CLOCK/MDM2/CAB39/RAC1/HUS1/NMT1/TANK/MYC/YAP1/SLC12A6/TP53/AKT1/BCL10/SDE2/PARP1/RHOB/RHBDD1/PIK3R1/EGFR/TLK…	112
GO:0104004	GO:0104004	cellular response to environmental stimulus	112/4092	331/17320	1.40341e-05	0.000224258	0.000172134	GCLC/CREBBP/FAS/HSPA5/OPN3/YBX3/CNN2/MAP2K4/TNFRSF1A/TP53BP1/NUCKS1/GNB1/XRCC5/ZMPSTE24/REST/BAX/GNA11/SIRT1/EP300/YY1/PIEZO1/TNFRSF10A/AKT2/NAMPT/MTPN/CASP2/NFKB1/TMEM109/METAP2/LTBR/MAPK14/ERRFI1/RPE65/SLC2A1/GOT1/EGR1/TNFRSF10B/CDKN1A/SOX9/SLC25A23/ELK1/ATF4/EIF2AK4/PDE6A/EIF2S1/SLC38A2/CLOCK/MDM2/CAB39/RAC1/HUS1/NMT1/TANK/MYC/YAP1/SLC12A6/TP53/AKT1/BCL10/SDE2/PARP1/RHOB/RHBDD1/PIK3R1/EGFR/TLK…	112
GO:0070498	GO:0070498	interleukin-1-mediated signaling pathway	43/4092	100/17320	1.42634e-05	0.000226421	0.000173795	PSMA4/CUL1/TAB2/PSME4/FBXW11/PSMD5/PSMD8/PSMB5/PSMA6/PSMA7/PSMD10/PSMD7/RIPK2/PSMA2/PSMD3/PSMD11/NFKB1/SKP1/PSMD14/EGR1/PSMF1/PSMB2/PSMA1/PSME3/MAP3K7/PSMB7/PSMA5/RPS27A/UBC/TAB3/SQSTM1/PSMC2/OTUD4/UBB/MYD88/RELA/UBE2N/IRAK1/PSMD12/CHUK/UBA52/UBE2V1/RPS6KA5	43
GO:0031050	GO:0031050	dsRNA processing	27/4092	53/17320	1.42782e-05	0.000226421	0.000173795	PUM2/ZMPSTE24/AGO1/TGFB1/DDX5/HNRNPA2B1/AGO2/BMP4/AGO3/PUM1/TUT4/PPP3CA/NCOR1/TP53/EGFR/ADAR/SNIP1/SMAD3/STAT3/MAP2K1/SMAD1/SMAD2/PRKRA/TSN/DICER1/TSNAX/METTL3	27
GO:0070918	GO:0070918	production of small RNA involved in gene silencing by RNA	27/4092	53/17320	1.42782e-05	0.000226421	0.000173795	PUM2/ZMPSTE24/AGO1/TGFB1/DDX5/HNRNPA2B1/AGO2/BMP4/AGO3/PUM1/TUT4/PPP3CA/NCOR1/TP53/EGFR/ADAR/SNIP1/SMAD3/STAT3/MAP2K1/SMAD1/SMAD2/PRKRA/TSN/DICER1/TSNAX/METTL3	27
GO:0072395	GO:0072395	signal transduction involved in cell cycle checkpoint	34/4092	73/17320	1.44297e-05	0.000228245	0.000175195	CNOT4/BAX/PCBP4/EP300/CASP2/PRPF19/CNOT6/TFDP2/ARID3A/PLAGL1/CDKN1A/SOX4/CNOT1/PRMT1/MDM2/CNOT6L/PML/TP53/CARM1/CNOT9/PLK2/CNOT8/CNOT11/BTG2/ZNF385A/RPL26/ABRAXAS1/E2F7/TRIAP1/TFDP1/MDM4/CNOT7/E2F4/CDC5L	34
GO:0043555	GO:0043555	regulation of translation in response to stress	14/4092	20/17320	1.45724e-05	0.00022992	0.00017648	EIF2AK2/EIF2AK1/DNAJC3/EIF4G1/ATF4/EIF2AK4/SESN2/EIF2S1/PPP1R15B/PPP1CA/RBM4/NPM1/DDX3X/IMPACT	14
GO:0031397	GO:0031397	negative regulation of protein ubiquitination	35/4092	76/17320	1.47549e-05	0.000232214	0.000178241	GCLC/ATG5/U2AF2/PSEN1/DNAJA1/ABL1/UBR5/CAV1/LIMK1/GTPBP4/BAG2/PARK7/IVNS1ABP/RPL5/SOX4/RPL23/GNL3L/GPS2/MARCHF7/ARRB1/ARRB2/AKT1/RPL11/SPOPL/RPS3/SQSTM1/SENP2/CAMLG/BAG5/TRIM44/NXN/PARP10/CHP1/SIRT7/MAD2L1	35
GO:0033120	GO:0033120	positive regulation of RNA splicing	21/4092	37/17320	1.49714e-05	0.000234408	0.000179925	THRAP3/U2AF2/DAZAP1/RBM22/RBM3/SETX/HSPA8/PRPF19/NUP98/NCL/PRDX6/SLC38A2/TRA2B/SF3B4/PIK3R1/RBMX/DYRK1A/TRA2A/POLR2A/RBMXL1/ERN1	21
GO:0045070	GO:0045070	positive regulation of viral genome replication	21/4092	37/17320	1.49714e-05	0.000234408	0.000179925	PKN2/NUCKS1/PABPC1/HACD3/SRPK1/VAPA/HSPA8/VAPB/STAU1/TBC1D20/SRPK2/STOM/LARP1/ADAR/PPIB/PDE12/TMEM39A/PPIA/CNOT7/DDX3X/PPIE	21
GO:1903578	GO:1903578	regulation of ATP metabolic process	50/4092	122/17320	1.50069e-05	0.000234408	0.000179925	NDC1/RHOA/ENO1/TIGAR/PSEN1/SEH1L/NUP50/EP300/HIF1A/PGK1/PRKAG2/PPIF/NUP88/NUP98/COX7A2/NUP155/PARK7/NUP43/NUP153/SLC25A23/CBFA2T3/PRKAA1/ISCU/NUP54/NUP58/NCOR1/TP53/APP/ARNT/PARP1/RANBP2/PINK1/JMJD8/AK4/VCP/STAT3/PFKFB3/INSR/PGAM1/SLC25A33/PDE12/ZBTB7A/ZBTB20/PRKAG1/SHMT2/PPARA/POM121/NUP62/EIF6/POM121C	50
GO:0031145	GO:0031145	anaphase-promoting complex-dependent catabolic process	37/4092	82/17320	1.50998e-05	0.000235271	0.000180587	CDC27/CUL3/PSMA4/PSME4/UBE2D1/CDC23/PSMD5/PSMD8/PSMB5/PSMA6/PSMA7/PSMD10/PSMD7/FBXO31/PSMA2/PSMD3/PSMD11/PSMD14/PSMF1/PSMB2/PSMA1/PSME3/PSMB7/PSMA5/RPS27A/UBC/BUB3/PSMC2/ANAPC16/UBE2E1/UBB/CDC26/PSMD12/UBA52/ANAPC1/MAD2L1/ANAPC10	37
GO:0030218	GO:0030218	erythrocyte differentiation	49/4092	119/17320	1.56451e-05	0.000243113	0.000186607	KMT2E/HIPK2/SENP1/NFE2L1/ADD1/MAEA/RBFOX2/HIF1A/ACIN1/RPS19/CDK6/SH2B3/MAPK14/SRF/VEGFA/HSPA9/SMAD5/STAT1/ID2/EPAS1/FOXO3/PTBP3/FAM210B/BMP4/MED1/PRMT1/ZFP36/ACVR1B/KAT7/TMOD3/RB1/ARNT/SLC25A38/MFHAS1/CEBPG/DMTN/ADAR/FLVCR1/SFXN1/RPS14/B2M/STAT3/KLF13/SP3/PTPN2/ZBTB7A/ZFP36L1/LDB1/LYN	49
GO:0010332	GO:0010332	response to gamma radiation	28/4092	56/17320	1.56809e-05	0.000243113	0.000186607	HSPA5/TIGAR/XRCC5/ZMPSTE24/BAX/TMEM109/CBL/EGR1/CDKN1A/ELK1/PRKAA1/MEN1/MDM2/MYC/YAP1/PML/TP53/PARP1/TLK2/RPL26/WRN/BCL2L1/HSF1/DCUN1D3/H2AX/XRCC6/TRIM13/GPX1	28
GO:0070997	GO:0070997	neuron death	118/4092	353/17320	1.57743e-05	0.000243954	0.000187253	GCLC/CRLF1/AP2B1/BID/FAS/HSPA5/HIPK2/MAP2K4/RHOA/VPS35/CDC42/PICALM/TIGAR/PSEN1/GSK3B/REST/SSH1/BAX/PPP1R13B/KDM2B/AARS1/HSP90AB1/SIRT1/ABL1/FBXO7/SIX4/HIF1A/ADNP/CHMP4B/XIAP/AKT2/GSK3A/NAMPT/CASP2/UNC5B/DKK1/TRIM2/FBXW7/CBL/GAPDH/ATN1/SOD2/EIF4G1/LANCL1/ATF2/DHCR24/PARK7/FOXO3/SET/EGR1/PIGT/MAX/ELK1/ATF4/SNX6/PPT1/KRAS/RRAS2/EIF2S1/SRPK2/EGLN1/STXBP1/ARRB1/MAP3K12/RB1/PDPK1/ARRB2/TP53/SOD1/APP/A…	118
GO:0046949	GO:0046949	fatty-acyl-CoA biosynthetic process	19/4092	32/17320	1.58211e-05	0.000244075	0.000187345	ELOVL5/ELOVL1/ACSL4/SCD/TECR/SLC25A1/ACSBG1/ACSL3/PPT1/ACLY/SCD5/CBR4/HSD17B12/ELOVL7/FASN/ELOVL6/HACD2/HTD2/ACACA	19
GO:0030099	GO:0030099	myeloid cell differentiation	138/4092	425/17320	1.68004e-05	0.000258451	0.00019838	CREBBP/KMT2E/PAFAH1B1/KITLG/KMT2C/HIPK2/CBFB/CDC42/WDR1/ACTN1/TFRC/GPR137B/HOXA9/SENP1/CNOT4/PSEN1/NFE2L1/KAT6A/EIF2AK1/ADD1/MAEA/PABPC4/TNRC6A/AGO1/SIRT1/SETD1A/THOC5/RBFOX2/MYH9/TNRC6B/EP300/HIF1A/ACIN1/TGFB1/RPS19/CDK6/FBXW7/CD81/SH2B3/LTBR/MAPK14/SRF/VEGFA/HSPA9/SMAD5/STAT1/ID2/EPAS1/HDAC1/RBBP5/KMT2A/FOXO3/PTBP3/FAM210B/GLO1/BMP4/MED1/AGO3/PRMT1/ZFP36/LIF/CBFA2T3/NDFIP1/RARA/PPARG/H3-3B/NOTC…	138
GO:0036293	GO:0036293	response to decreased oxygen levels	119/4092	357/17320	1.68357e-05	0.000258451	0.00019838	CFLAR/CREBBP/PSMA4/HIPK2/PKM/RHOA/PDK3/PSME4/ENO1/TIGAR/GNB1/PLOD1/REST/ALKBH5/PSMD5/SIRT1/PSMD8/EP300/HIF1A/PSMB5/PSMA6/PSMA7/TM9SF4/CST3/AHCY/PSMD10/PGK1/PSMD7/STUB1/NDRG1/BNIP3L/NAMPT/CAV1/PSMA2/PSMD3/PSMD11/BIRC2/CBL/SRF/VEGFA/SLC29A1/STC2/PSMD14/EPAS1/NFE2L2/SLC2A1/FOXO3/EGR1/WDR83/PSMF1/PSMB2/HP1BP3/ATF4/PSMA1/AJUBA/CBFA2T3/ACTN4/PSME3/RAF1/PRKAA1/VHL/ROCK2/LDHA/UBQLN1/MDM2/EGLN1/PSMB7/MYC/…	119
GO:0042306	GO:0042306	regulation of protein import into nucleus	29/4092	59/17320	1.69311e-05	0.000259277	0.000199014	CDH1/IPO5/PSEN1/RBM22/MAVS/HSP90AB1/MAPK1/FERMT1/NUTF2/UBR5/TGFB1/PIK3R2/MAPK14/TARDBP/BMP4/TRIM28/RAN/NUP54/NUP58/PIK3R1/BAG3/NOLC1/SMAD3/PKIG/JUP/CHP1/NF1/FLNA/NUP62	29
GO:0032956	GO:0032956	regulation of actin cytoskeleton organization	117/4092	350/17320	1.70809e-05	0.000260933	0.000200285	BAIAP2L1/TMSB10/ARHGAP6/LIMA1/CYFIP2/NCKAP1/CTNNA2/RHOA/PFN2/CDC42/WDR1/CLASP1/FSCN1/DLG1/CAPZB/SSH1/ADD1/PXN/ABL1/COTL1/TJP1/MTPN/MET/WASL/LIMK1/TGFBR1/KANK1/PFN1/WASF1/ACTR3/SPTBN1/RND3/ALMS1/CAPZA1/STMN1/ABITRAM/RHOQ/SDC4/VASP/MKKS/DSTN/ID1/CDC42EP1/RAC2/SNX9/LATS1/ARFIP2/SWAP70/NOTCH2/SPIRE1/ROCK2/RAC1/TMOD1/RDX/ACTR2/ABI2/TMOD3/AP1AR/RHOF/ARHGAP17/SSH2/ARHGDIA/SMAD4/ABL2/ARF1/RHOB/PHLDB2/EPH…	117
GO:1901800	GO:1901800	positive regulation of proteasomal protein catabolic process	46/4092	110/17320	1.75198e-05	0.000266558	0.000204602	GCLC/RNF14/PIAS1/RNF19A/HERPUD1/ATXN3/CHFR/PSEN1/GSK3B/TRIB3/PSMD10/STUB1/SGTA/GSK3A/CAV1/FBXW7/BAG2/CSNK1A1/SUMO1/NFE2L2/CBFA2T3/UBQLN1/MDM2/RNF185/TMTC3/CSNK1D/AKT1/PLK2/RNF217/ZER1/PSMC2/ZYG11B/RCHY1/VCP/ARIH1/FBXO22/TRIB1/FBXW8/ARIH2/SOCS4/TMEM259/BCAP31/UBQLN2/SUMO2/RACK1/CSNK1E	46
GO:0031468	GO:0031468	nuclear envelope reassembly	13/4092	18/17320	1.76198e-05	0.000266558	0.000204602	CHMP4B/PPP2R1A/PPP2CA/VPS4A/CHMP7/LMNA/REEP3/UBXN2A/BANF1/ANKLE2/UBXN2B/PPP2R2A/EMD	13
GO:0071786	GO:0071786	endoplasmic reticulum tubular network organization	13/4092	18/17320	1.76198e-05	0.000266558	0.000204602	RAB10/RAB18/TMEM33/RTN4/RAB3GAP1/RAB3GAP2/ATL2/RTN3/LNPK/REEP3/TMEM170A/ARL6IP1/ATL3	13
GO:2000641	GO:2000641	regulation of early endosome to late endosome transport	13/4092	18/17320	1.76198e-05	0.000266558	0.000204602	PTPN23/RAB21/MTMR2/EZR/MAPK1/SNX3/CHMP3/DENND10/RDX/MSN/SNX12/MAP2K1/SRC	13
GO:1904896	GO:1904896	ESCRT complex disassembly	4092-09-01	10/17320	1.7945e-05	0.000268653	0.000206211	VTA1/CHMP2B/CHMP5/VPS4B/CHMP1A/VPS4A/CHMP7/IST1/CHMP1B	9
GO:1904903	GO:1904903	ESCRT III complex disassembly	4092-09-01	10/17320	1.7945e-05	0.000268653	0.000206211	VTA1/CHMP2B/CHMP5/VPS4B/CHMP1A/VPS4A/CHMP7/IST1/CHMP1B	9
GO:0016574	GO:0016574	histone ubiquitination	25/4092	48/17320	1.7992e-05	0.000268653	0.000206211	UBE2A/HUWE1/ATXN7L3/KDM2B/WAC/UBR5/PHC1/SKP1/PARK7/UBE2B/USP22/CDC73/CDK9/CUL4B/RYBP/RNF168/BMI1/UBE2E1/UBE2N/SUZ12/PCGF5/PCGF3/CTR9/PCGF2/PCGF6	25
GO:0032784	GO:0032784	regulation of DNA-templated transcription, elongation	25/4092	48/17320	1.7992e-05	0.000268653	0.000206211	CDK13/CCNT2/CCNK/SUPT16H/THOC5/NELFCD/TCERG1/GTF2F1/CCNT1/EAPP/CDC73/KAT7/BRD4/HNRNPU/ELOC/CCAR2/WDR43/RNF168/CDK12/SETD5/SUPT5H/LDB1/HMGN1/SCAF8/SUPT4H1	25
GO:0043631	GO:0043631	RNA polyadenylation	25/4092	48/17320	1.7992e-05	0.000268653	0.000206211	PABPC1/PAPOLA/PABPC1L/MTPAP/CPSF6/TENT4A/TENT4B/CCNT1/GRSF1/CDC73/TUT4/WDR33/CDK9/APP/CPSF7/SSU72/VIRMA/NUDT21/AHCYL1/CSTF3/HSF1/SUPT5H/CTR9/SCAF8/CPSF2	25
GO:1904589	GO:1904589	regulation of protein import	30/4092	62/17320	1.80163e-05	0.000268653	0.000206211	CDH1/IPO5/PSEN1/RBM22/MAVS/HSP90AB1/MAPK1/FERMT1/NUTF2/UBR5/TGFB1/PIK3R2/HSPA8/MAPK14/TARDBP/BMP4/TRIM28/RAN/NUP54/NUP58/PIK3R1/BAG3/NOLC1/SMAD3/PKIG/JUP/CHP1/NF1/FLNA/NUP62	30
GO:0000086	GO:0000086	G2/M transition of mitotic cell cycle	88/4092	249/17320	1.82025e-05	0.000270784	0.000207846	FBXL3/PAFAH1B1/PSMA4/FOXN3/CUL1/PPP1R12A/TAF2/PSME4/PRKACA/FBXW11/NDE1/CLASP1/DYNC1I2/HSP90AA1/DYNLL1/PSMD5/PSMD8/PSMB5/PSMA6/PSMA7/CDC25B/MAPRE1/PSMD10/PSMD7/RAB11A/NBN/PPP2R1A/PSMA2/CCNY/PSMD3/PSMD11/YWHAE/CCND1/TPD52L1/SKP1/PSMD14/ALMS1/VPS4B/KHDRBS1/CDKN1A/PSMF1/PSMB2/ARPP19/PSMA1/AJUBA/LATS1/TUBG1/PSME3/VPS4A/TAOK3/CDK4/HUS1/PSMB7/HAUS2/ACTR1A/PHLDA1/CSNK1D/BRD4/APP/PSMA5/ENSA/CETN2/HMGA2/RA…	88
GO:0002218	GO:0002218	activation of innate immune response	56/4092	142/17320	1.84809e-05	0.000274273	0.000210524	CREBBP/MATR3/PSMA4/CUL1/TAB2/PSME4/PRKACA/FBXW11/XRCC5/MAVS/PSMD5/PSMD8/EP300/PSMB5/PSMA6/PSMA7/PSMD10/PSMD7/PSMA2/PSMD3/PSMD11/NFKB1/SKP1/PSMD14/PSMF1/PSMB2/PSMA1/PSME3/RAF1/TRIM5/KRAS/MAP3K7/PSMB7/PDPK1/BCL10/PRKACB/PSMA5/NONO/TAB3/PSMC2/SIN3A/MUC3A/RELA/PAK2/HEXIM1/HMGB1/XRCC6/SRC/PSMD12/MUC12/NRAS/CHUK/ZCCHC3/LYN/RPS6KA5/SFPQ	56
GO:0071479	GO:0071479	cellular response to ionizing radiation	32/4092	68/17320	1.96757e-05	0.000291312	0.000223603	HSPA5/TP53BP1/NUCKS1/XRCC5/ZMPSTE24/SIRT1/NAMPT/TMEM109/MAPK14/EGR1/CDKN1A/ELK1/CLOCK/MDM2/HUS1/TANK/YAP1/TP53/RHOB/TLK2/HMGA2/RPL26/NIPBL/SPIDR/WRN/BCL2L1/RAD9A/NET1/GRB2/HSF1/H2AX/XRCC6	32
GO:0060148	GO:0060148	positive regulation of posttranscriptional gene silencing	16/4092	25/17320	1.99311e-05	0.000294396	0.00022597	PUM2/TGFB1/DDX5/FXR1/EIF4G1/AGO2/XPO5/BMP4/ZFP36/AJUBA/PUM1/TP53/LIMD1/EGFR/STAT3/MAP2K1	16
GO:1902893	GO:1902893	regulation of pri-miRNA transcription by RNA polymerase II	26/4092	51/17320	2.0175e-05	0.000296596	0.000227659	SREBF1/NFATC3/HIF1A/YY1/KLF5/TGFB1/BMPR1A/SRF/NR3C1/FOXO3/EGR1/BMP4/SOX9/PPARG/KLF4/TP53/GNL3/SMAD3/STAT3/SMAD1/RELA/FOSL1/PPARA/TEAD1/SREBF2/NFIB	26
GO:1903573	GO:1903573	negative regulation of response to endoplasmic reticulum stress	26/4092	51/17320	2.0175e-05	0.000296596	0.000227659	HSPA5/HERPUD1/ERLEC1/DERL2/XBP1/USP14/DNAJC3/BFAR/SGTA/LPCAT3/PARK7/TXNDC12/SELENOS/UBAC2/TMBIM6/HYOU1/PPP1R15B/SYVN1/BCL2L1/GRINA/UBE2G2/PTPN1/UBE2J1/RACK1/MAGEA3/DNAJB9	26
GO:0002244	GO:0002244	hematopoietic progenitor cell differentiation	65/4092	172/17320	2.09294e-05	0.000306485	0.00023525	PSMA4/KITLG/FOXC1/EIF2AK2/CBFB/PSME4/TCF3/PDCD2/ITCH/XRCC5/PSEN1/REST/PSMD5/ABL1/PSMD8/SETD1A/PSMB5/PSMA6/PSMA7/PSMD10/PSMD7/SLC7A6OS/TGFB1/SIPA1L3/CDK6/PSMA2/PSMD3/PSMD11/SRF/HSPA9/PSMD14/SOS1/NFE2L2/PRRC2C/KMT2A/HOXB3/SOX4/BMP4/PSMF1/PSMB2/SBDS/PSMA1/PSME3/C12orf29/DPF2/PSMB7/YAP1/TCF12/TP53/PSMA5/AGPAT5/SSBP3/RUNX1/ADAR/PSMC2/JAM3/NUDT21/EEF2/SIN3A/CHD2/PSMD12/YTHDF2/LDB1/WDR7/METTL3	65
GO:0072332	GO:0072332	intrinsic apoptotic signaling pathway by p53 class mediator	35/4092	77/17320	2.09458e-05	0.000306485	0.00023525	CD44/RRM2B/HIPK2/RRN3/BAX/PPP1R13B/SIRT1/EP300/DDX5/TMEM109/PERP/CDKN1A/DYRK2/MDM2/MARCHF7/PML/TP53/PMAIP1/RPL11/JMY/ZNF385A/RPL26/MSX1/HIPK1/SHISA5/HNRNPK/HINT1/UBB/TRIAP1/PHLDA3/AEN/PTTG1IP/RPS27L/TAF9B/TAF9	35
GO:1904816	GO:1904816	positive regulation of protein localization to chromosome, telomeric region	4092-10-01	12/17320	2.19008e-05	0.00031971	0.000245401	CCT4/TCP1/GNL3L/DKC1/CCT6A/CCT5/CCT8/CCT3/GNL3/CCT2	10
GO:0071364	GO:0071364	cellular response to epidermal growth factor stimulus	23/4092	43/17320	2.2059e-05	0.000320523	0.000246025	CFLAR/FOXC1/PPP1R9B/DUSP3/CBL/NCL/ERRFI1/SOX9/MED1/ID1/PTPN12/ZFP36/PDPK1/GAREM1/ERBB2/AKT1/EGFR/ZFP36L2/EEF1A1/BAG4/SYAP1/PTPN11/ZFP36L1	23
GO:1903146	GO:1903146	regulation of autophagy of mitochondrion	23/4092	43/17320	2.2059e-05	0.000320523	0.000246025	USP36/CSNK2A2/SREBF1/TIGAR/HUWE1/MUL1/FBXO7/HIF1A/BNIP3L/CDC37/GSK3A/FBXW7/CAMKK2/PARK7/MFN2/TP53/PINK1/ATP13A2/HK2/RNF41/SMURF1/SREBF2/VDAC1	23
GO:0060211	GO:0060211	regulation of nuclear-transcribed mRNA poly(A) tail shortening	4092-11-01	14/17320	2.22497e-05	0.000322544	0.000247576	PABPC1/TNRC6A/TNRC6B/TENT4A/TENT4B/AGO2/CNOT1/ZFP36/TOB1/BTG2/CNOT7	11
GO:0052126	GO:0052126	movement in host environment	64/4092	169/17320	2.23634e-05	0.000323441	0.000248264	CDH1/TFRC/PVR/TSG101/RAB7A/ITCH/CHMP2B/CHMP4B/VAPA/KPNA3/SLC1A5/CBLL1/CAV2/CAV1/MET/TRIM14/CBL/NECTIN1/CD81/SNX3/CHMP3/CD46/TRIM32/VPS4B/TRIM25/ZNF639/WWP1/NUP153/LDLR/TRIM28/TRIM5/VPS4A/SCARB2/VPS37B/PML/IFITM3/EPHA2/XPR1/DYNLT1/EGFR/ITGB1/CXADR/F11R/CTSB/PHB/AXL/RPSA/CTNNB1/TRIM8/DAG1/GRB2/IST1/EXOC7/IFITM2/P4HB/LAMP1/PPIA/CD55/SRC/CTNND1/TRIM13/EPS15/IDE/ITGAV	64
GO:0001666	GO:0001666	response to hypoxia	115/4092	345/17320	2.31487e-05	0.000334026	0.000256389	CFLAR/CREBBP/PSMA4/HIPK2/PKM/RHOA/PDK3/PSME4/ENO1/TIGAR/GNB1/PLOD1/REST/ALKBH5/PSMD5/SIRT1/PSMD8/EP300/HIF1A/PSMB5/PSMA6/PSMA7/TM9SF4/CST3/AHCY/PSMD10/PGK1/PSMD7/STUB1/NDRG1/BNIP3L/CAV1/PSMA2/PSMD3/PSMD11/BIRC2/SRF/VEGFA/SLC29A1/STC2/PSMD14/EPAS1/NFE2L2/SLC2A1/FOXO3/EGR1/WDR83/PSMF1/PSMB2/HP1BP3/PSMA1/AJUBA/CBFA2T3/ACTN4/PSME3/RAF1/PRKAA1/VHL/ROCK2/LDHA/UBQLN1/MDM2/EGLN1/PSMB7/MYC/TMBIM6/PML/TP53…	115
GO:0031334	GO:0031334	positive regulation of protein-containing complex assembly	89/4092	254/17320	2.37984e-05	0.000342609	0.000262977	DHX33/BAIAP2L1/BID/NCKAP1/CTNNA2/RHOA/PFN2/TFRC/CLASP1/FSCN1/DLG1/HSP90AA1/GSK3B/BAX/SH3GLB1/MAPRE1/STUB1/PIEZO1/MED25/TGFB1/MET/WASL/PFN1/SLAIN2/GTF2H3/CAND1/WASF1/VEGFA/EIF4G1/ACTR3/SUMO1/PARK7/VASP/RAP1B/CDC42EP1/AJUBA/GNL3L/SNX9/CLIP1/ARFIP2/RPA1/SPIRE1/RAC1/ACTR2/ABI2/AP1AR/WARS1/TP53/ARF1/PARP1/MSN/RPS3/MPP7/TIRAP/FER/JMY/BCL2L11/ASAP1/RHOC/BAG4/WASF2/CUL4B/PINK1/PSMC2/ARPC5/CDC42EP3/ARPC2/…	89
GO:0061951	GO:0061951	establishment of protein localization to plasma membrane	29/4092	60/17320	2.54112e-05	0.00036415	0.000279511	GOPC/VAMP3/VPS35/NSF/RAB10/GGA2/RAB11A/ZDHHC2/GOLPH3/SPTBN1/GORASP2/BLZF1/LYPLA1/ACSL3/VAMP7/BBS2/PREPL/GOLPH3L/GOLGA4/GOLGA7/SEC16A/CNST/RAB8A/RAB31/NECTIN3/SYS1/RACK1/RSC1A1/VAMP2	29
GO:1903078	GO:1903078	positive regulation of protein localization to plasma membrane	29/4092	60/17320	2.54112e-05	0.00036415	0.000279511	ITGA3/PRKCH/ATP2B4/DLG1/EZR/ZDHHC8/RAB11A/ZDHHC2/RAB11FIP2/PPP1R9B/SPTBN1/PLS1/ACSL3/PDPK1/AKT1/EPHA2/PIK3R1/EGFR/ITGB1/ZDHHC5/RER1/SQSTM1/CNST/ARF6/STX3/KIF5B/PRNP/RHOG/RACK1	29
GO:0009260	GO:0009260	ribonucleotide biosynthetic process	68/4092	183/17320	2.58911e-05	0.000370178	0.000284138	AK2/ELOVL5/ELOVL1/PKM/PDK3/ACSL4/ENO1/VPS9D1/PDPR/DLD/ACOT7/SCD/TECR/SLC25A1/DHODH/NME4/ACSBG1/TGFB1/IMPDH1/PRKAG2/ATP5F1B/ATP5PB/PANK3/ADCY7/ACSL3/ATP5F1E/PANK2/PAICS/PPAT/PPT1/ACLY/PDHA1/RFK/ATP5MC2/ADCY3/UCK2/PARP1/SCD5/CBR4/AK3/HSD17B12/ALDOA/ATP5F1A/ATP5MC3/SLC35B2/PINK1/GART/ADCY9/CMPK1/AK4/GMPS/ELOVL7/PDP1/VCP/STAT3/FASN/ELOVL6/PDP2/IMPDH2/PFAS/CYC1/HACD2/NME1/ATP5MF/NME2/HTD2/ACACA/ADK	68
GO:0032872	GO:0032872	regulation of stress-activated MAPK cascade	81/4092	227/17320	2.59932e-05	0.000370439	0.000284339	WNT16/MAP3K9/PAFAH1B1/SPAG9/FAS/EIF2AK2/HIPK2/KARS1/MAP2K4/CDC42/MAP4K4/MAP3K13/HACD3/SEMA3A/DLG1/ITCH/MAGI3/MECOM/DNAJA1/MUL1/EZR/MAPK1/MID1/RIPK2/STK3/FKTN/DKK1/DUSP3/HIPK3/LTBR/TPD52L1/VEGFA/HMGCR/PDCD10/PRDX1/RAP2A/PRMT1/KLHDC10/TRAF3/GPS2/MEN1/TAOK3/MAP3K7/MYC/SDCBP/MAP3K12/IGF1R/MARVELD3/NCOR1/MINK1/APP/AKT1/MAP3K21/ARL6IP5/EGFR/MFHAS1/RPS3/TIRAP/PDCD4/FOXO1/SH3RF1/TIAM1/XDH/PINK1/TAOK1/DVL…	81
GO:0044003	GO:0044003	modulation by symbiont of host process	21/4092	38/17320	2.6028e-05	0.000370439	0.000284339	EIF2AK2/ATG5/HIPK2/PABPN1/KPNA3/KPNB1/GAPDH/KPNA1/VAPB/EIF2AK4/BCL2L11/RRAGA/SERPINB9/INSR/BCL2L1/DAG1/KPNA2/RXRA/KPNA4/ATG7/PHB2	21
GO:1901522	GO:1901522	positive regulation of transcription from RNA polymerase II promoter involved in cellular response to chemical stimulus	15/4092	23/17320	2.62734e-05	0.000373083	0.000286368	NFYA/XBP1/EP300/HIF1A/VEGFA/SMAD5/NFE2L2/CHD6/ATF4/SESN2/TP53/SMAD4/RBPJ/SMAD1/RELA	15
GO:0007623	GO:0007623	circadian rhythm	78/4092	217/17320	2.71526e-05	0.000384693	0.00029528	MYCBP2/FBXL3/THRAP3/OPN3/SREBF1/FBXW11/GSK3B/HUWE1/GNA11/SIRT1/SRRD/EP300/PRMT5/CST3/AHCY/HNRNPL/NAMPT/AHR/SETX/RAI1/FBXW7/UBE3A/ID2/HDAC1/RPE65/KMT2A/EGR1/TARDBP/USP9X/HNRNPR/ID1/NR1D1/ATF4/JUND/PPARG/PRKAA1/ROCK2/CLOCK/CDK4/NCOA2/PML/ZFHX3/NCOR1/TP53/CSNK1D/EGFR/NONO/HTR7/HNRNPU/KLF10/GNAQ/DYRK1A/CCAR2/SIN3A/PTEN/PPP1CA/KDM2A/RBM4B/RBM4/NR1D2/BDNF/IMPDH2/NRIP1/SIAH2/PPP1CC/PPARA/CLDN4/HDAC2/ADA…	78
GO:0032922	GO:0032922	circadian regulation of gene expression	31/4092	66/17320	2.7669e-05	0.000389771	0.000299177	MYCBP2/HUWE1/SIRT1/PRMT5/NAMPT/AHR/RAI1/ID2/HDAC1/KMT2A/EGR1/ID1/NR1D1/ATF4/CLOCK/NCOA2/PML/ZFHX3/CSNK1D/HNRNPU/PPP1CA/KDM2A/RBM4B/NRIP1/PPP1CC/PPARA/HDAC2/GFPT1/TOP1/PPP1CB/CSNK1E	31
GO:0009152	GO:0009152	purine ribonucleotide biosynthetic process	64/4092	170/17320	2.76849e-05	0.000389771	0.000299177	AK2/ELOVL5/ELOVL1/PKM/PDK3/ACSL4/ENO1/VPS9D1/PDPR/DLD/ACOT7/SCD/TECR/SLC25A1/NME4/ACSBG1/TGFB1/IMPDH1/PRKAG2/ATP5F1B/ATP5PB/PANK3/ADCY7/ACSL3/ATP5F1E/PANK2/PAICS/PPAT/PPT1/ACLY/PDHA1/ATP5MC2/ADCY3/PARP1/SCD5/CBR4/AK3/HSD17B12/ALDOA/ATP5F1A/ATP5MC3/SLC35B2/PINK1/GART/ADCY9/AK4/GMPS/ELOVL7/PDP1/VCP/STAT3/FASN/ELOVL6/PDP2/IMPDH2/PFAS/CYC1/HACD2/NME1/ATP5MF/NME2/HTD2/ACACA/ADK	64
GO:0001701	GO:0001701	in utero embryonic development	125/4092	382/17320	2.77031e-05	0.000389771	0.000299177	FUT8/CUL3/FOXC1/YBX3/YBX1/ATP11A/UBE2A/RRN3/TMED2/ADD1/MAPK1/MYH9/HIF1A/CCNB1IP1/STK4/MIB1/RBBP8/NBN/STK3/ASF1B/DNAJB6/TGFBR1/ZFAND5/BMPR1A/ZMIZ1/PRPF19/SRF/VEGFA/CERT1/EPB41L5/ACVR1/RTN4/BIRC6/EPAS1/MFN2/UBE2B/GNA13/RBBP6/MED1/EIF2S2/PRMT1/SBDS/EMG1/LIF/DAD1/TRIM28/LATS1/MYH10/NOTCH2/ACVR1B/EGLN1/EIF4E2/NMT1/SMPD4/HS6ST1/LMX1B/RTF1/ADAM10/FURIN/CMTM3/TP53/SMAD4/AKT1/ARNT/BTF3/RPL7L1/GNA12/EGFR/I…	125
GO:0010565	GO:0010565	regulation of cellular ketone metabolic process	67/4092	180/17320	2.77606e-05	0.000389771	0.000299177	ADIPOR2/ELOVL5/PSMA4/ATP2B4/PDK3/PSME4/SREBF1/NFE2L1/REST/PDPR/COMT/PSMD5/SIRT1/PSMD8/PSMB5/PSMA6/PSMA7/TRIB3/PSMD10/LONP2/PSMD7/OAZ1/AKT2/CAV1/PSMA2/PRKAG2/ERLIN1/PSMD3/PSMD11/PSMD14/ODC1/PARK7/EGR1/LPGAT1/SOX9/PANK2/PSMF1/PSMB2/NR1D1/PSMA1/PSME3/PRKAB2/PPARG/ANXA1/PSMB7/NCOR1/AKT1/PSMA5/ERLIN2/SLC7A11/BMP6/AZIN1/ADIPOR1/PSMC2/FGF19/STARD4/FABP5/PDP1/MID1IP1/IRS1/PDP2/NQO1/PPARA/PPTC7/PSMD12/MAL…	67
GO:0006513	GO:0006513	protein monoubiquitination	32/4092	69/17320	2.84328e-05	0.000397787	0.00030533	CUL3/CUL1/TSG101/HUWE1/ATXN7L3/KDM2B/WAC/MGRN1/UBE2W/UBE2R2/UBE2D3/BIRC2/CBL/SKP1/KLHL12/UBE2B/TRIM25/CDC73/MARCHF7/FBXL2/CUL4B/RYBP/RNF168/BMI1/UBE2E1/UBB/PCGF5/PCGF3/CTR9/PDCD6/PCGF2/PCGF6	32
GO:0035196	GO:0035196	production of miRNAs involved in gene silencing by miRNA	25/4092	49/17320	2.85225e-05	0.000397787	0.00030533	PUM2/ZMPSTE24/AGO1/TGFB1/DDX5/HNRNPA2B1/AGO2/BMP4/AGO3/PUM1/TUT4/PPP3CA/NCOR1/TP53/EGFR/ADAR/SNIP1/SMAD3/STAT3/MAP2K1/SMAD1/SMAD2/PRKRA/DICER1/METTL3	25
GO:0071349	GO:0071349	cellular response to interleukin-12	25/4092	49/17320	2.85225e-05	0.000397787	0.00030533	RALA/CNN2/CDC42/RPLP0/MTAP/SOD2/HSPA9/CAPZA1/TCP1/HNRNPA2B1/RAP1B/SOD1/ARF1/MSN/PDCD4/HNRNPDL/JAK1/HNRNPF/CFL1/PITPNA/PAK2/ANXA2/P4HB/PPIA/CD47	25
GO:0035337	GO:0035337	fatty-acyl-CoA metabolic process	22/4092	41/17320	3.11039e-05	0.000432822	0.000332222	ELOVL5/ELOVL1/ACSL4/ACOT7/SCD/TECR/SLC25A1/ACSBG1/ACSL3/PPT1/ACLY/SCD5/CBR4/HSD17B12/ELOVL7/FASN/ELOVL6/DGAT1/FAR1/HACD2/HTD2/ACACA	22
GO:0006998	GO:0006998	nuclear envelope organization	26/4092	52/17320	3.13207e-05	0.00043487	0.000333794	PAFAH1B1/ZMPSTE24/CHMP4B/PPP2R1A/PARP11/NUP155/PPP2CA/NEK6/TARDBP/VPS4A/TOR1AIP1/CHMP7/LMNA/SUN1/REEP3/NDEL1/TMEM170A/TMEM43/UBXN2A/LEMD3/BANF1/CTDNEP1/ANKLE2/UBXN2B/PPP2R2A/EMD	26
GO:0071559	GO:0071559	response to transforming growth factor beta	85/4092	242/17320	3.24374e-05	0.000449377	0.000344929	CFLAR/CREBBP/ITGA3/RUNX3/STRAP/FUT8/HSPA5/HIPK2/RHOA/PXN/GLG1/HSP90AB1/SIRT1/CRKL/EP300/PPM1A/FERMT1/STUB1/TGFB1/CAV2/CAV1/TGFBR1/BMPR1A/ZMIZ1/MTMR4/SMURF2/CBL/ZNF451/NR3C1/SMAD5/EPB41L5/ACVR1/GOT1/USP9X/SOX9/ID1/TWSG1/SNX6/GDF15/MEN1/ROCK2/MAP3K7/TGFBRAP1/SDCBP/PML/FURIN/ZFHX3/PDPK1/ARRB2/TP53/SMAD4/PARP1/RPS27A/PARD3/UBC/ZFP36L2/PTPRK/RNF111/SKI/F11R/ZYX/TGFBR2/CITED2/SPRED1/SMAD3/CRK/ADAM9/PTK…	85
GO:0046390	GO:0046390	ribose phosphate biosynthetic process	70/4092	191/17320	3.3488e-05	0.000462905	0.000355313	AK2/ELOVL5/ELOVL1/PKM/PDK3/ACSL4/ENO1/VPS9D1/PDPR/DLD/ACOT7/SCD/TECR/SLC25A1/PRPS2/DHODH/NME4/ACSBG1/TGFB1/IMPDH1/PRKAG2/ATP5F1B/ATP5PB/PANK3/ADCY7/ACSL3/ATP5F1E/PANK2/PAICS/PPAT/PPT1/ACLY/PDHA1/RFK/ATP5MC2/ADCY3/UCK2/PARP1/SCD5/CBR4/PRPS1/AK3/HSD17B12/ALDOA/ATP5F1A/ATP5MC3/SLC35B2/PINK1/GART/ADCY9/CMPK1/AK4/GMPS/ELOVL7/PDP1/VCP/STAT3/FASN/ELOVL6/PDP2/IMPDH2/PFAS/CYC1/HACD2/NME1/ATP5MF/NME2/HTD2/…	70
GO:0019216	GO:0019216	regulation of lipid metabolic process	134/4092	416/17320	3.39701e-05	0.000468532	0.000359632	NFYA/CYP51A1/CREBBP/ADIPOR2/MBTPS2/ELOVL5/MTMR1/ME1/PPP2R5A/NFYC/PLPP1/TNFRSF1A/PDK3/CDC42/SREBF1/NFE2L1/ZMPSTE24/REST/MTMR2/PDPR/SIRT1/SCD/SLA2/TRIB3/TBL1X/LONP2/STUB1/LACTB/ASAH1/AKT2/TGFB1/PIK3R2/CAV1/PRKAG2/ERLIN1/MTMR4/KPNB1/NFKB1/FBXW7/SC5D/CD81/CREBL2/LPCAT3/HMGCR/FHL2/ID2/ACADM/NPC2/EGR1/LPGAT1/RAB38/ACSL3/SOX9/MED1/OPA3/PANK2/NR1D1/ATG14/LDLR/PRKAB2/PPARG/RAN/PRKAA1/GPS2/ANXA1/GOLM1/CDK4…	134
GO:0071901	GO:0071901	negative regulation of protein serine/threonine kinase activity	53/4092	135/17320	3.53343e-05	0.000486274	0.00037325	IPO5/LRP6/DNAJA1/SIRT1/ABL1/FBXO7/PPP2R1A/CAV1/HSPB1/PRKAG2/DUSP3/PRKAR1A/CHORDC1/HIPK3/SH2B3/DUSP16/STK38/HMGCR/PPP2CA/PRKAR2A/DUSP4/CDKN1A/BMP4/LATS1/GPS2/MEN1/APC/DUSP5/DUSP6/RB1/RPTOR/AKT1/LATS2/PDCD4/PAQR3/DUSP7/SPRED1/PKIG/YWHAG/PTEN/NR2F2/AIDA/HEXIM1/SPRY4/PTPN1/NF1/INKA2/SPRED2/IPO7/NUP62/LYN/DUSP14/PRKAR2B	53
GO:0045815	GO:0045815	positive regulation of gene expression, epigenetic	28/4092	58/17320	3.58557e-05	0.000492365	0.000377926	BAZ1B/ARID1B/SMARCD1/POLR1A/ACTB/POLR2E/EP300/PABPC1L/POLR1F/ZMIZ1/SF3B1/ARID1A/ZMIZ2/DEK/POLR1B/WBP2/HMGA1/POLR2K/SMARCA5/DDX21/TAF1D/CTNNB1/POLR1C/POLR2L/SERTAD2/H1-0/MYO1C/ASF1A	28
GO:0098876	GO:0098876	vesicle-mediated transport to the plasma membrane	40/4092	94/17320	3.74721e-05	0.00051231	0.000393235	RABEP1/GOPC/VAMP3/VPS35/EXOC5/NSF/RAB10/GGA2/RAB11A/ZDHHC2/ANKRD27/GOLPH3/SPTBN1/BLZF1/LYPLA1/VPS26A/ACSL3/ARFGEF2/VAMP7/BBS2/PREPL/SNX27/GOLPH3L/EXOC6B/GOLGA4/GOLGA7/SEC16A/ANKRD50/STEAP2/VPS26C/CNST/STX3/RAB8A/RAB31/CLSTN1/RAB11B/SYS1/RACK1/RSC1A1/VAMP2	40
GO:1901184	GO:1901184	regulation of ERBB signaling pathway	40/4092	94/17320	3.74721e-05	0.00051231	0.000393235	GPRC5A/PTPN3/CDC42/TSG101/RAB7A/PSEN1/SNX5/ARHGEF7/DUSP3/AREG/FBXW7/CBL/HBEGF/STAM2/RTN4/SOS1/ERRFI1/EREG/EPS15L1/HIP1/PTPN12/SNX6/RHBDF2/STAM/ERBB2/APP/AKT1/CNOT9/EGFR/FER/SHC1/TGFA/RBPJ/PTPN2/GRB2/SOCS4/HGS/NUP62/ITGA1/EPS15	40
GO:1904377	GO:1904377	positive regulation of protein localization to cell periphery	31/4092	67/17320	3.9918e-05	0.000544558	0.000417987	ITGA3/PRKCH/ATP2B4/DLG1/EZR/ZDHHC8/RAB11A/ZDHHC2/RAB11FIP2/PPP1R9B/SPTBN1/PLS1/ACSL3/GNAI1/PDPK1/AKT1/EPHA2/PIK3R1/EGFR/ITGB1/ZDHHC5/RER1/EPB41/SQSTM1/CNST/ARF6/STX3/KIF5B/PRNP/RHOG/RACK1	31
GO:0006378	GO:0006378	mRNA polyadenylation	24/4092	47/17320	4.03472e-05	0.000546832	0.000419733	PABPC1/PAPOLA/PABPC1L/MTPAP/CPSF6/TENT4B/CCNT1/GRSF1/CDC73/TUT4/WDR33/CDK9/APP/CPSF7/SSU72/VIRMA/NUDT21/AHCYL1/CSTF3/HSF1/SUPT5H/CTR9/SCAF8/CPSF2	24
GO:0035722	GO:0035722	interleukin-12-mediated signaling pathway	24/4092	47/17320	4.03472e-05	0.000546832	0.000419733	RALA/CNN2/CDC42/RPLP0/MTAP/SOD2/HSPA9/CAPZA1/TCP1/HNRNPA2B1/RAP1B/SOD1/ARF1/MSN/PDCD4/HNRNPDL/JAK1/HNRNPF/CFL1/PITPNA/PAK2/ANXA2/P4HB/PPIA	24
GO:0070849	GO:0070849	response to epidermal growth factor	24/4092	47/17320	4.03472e-05	0.000546832	0.000419733	CFLAR/FOXC1/MAPK1/PPP1R9B/DUSP3/CBL/NCL/ERRFI1/SOX9/MED1/ID1/PTPN12/ZFP36/PDPK1/GAREM1/ERBB2/AKT1/EGFR/ZFP36L2/EEF1A1/BAG4/SYAP1/PTPN11/ZFP36L1	24
GO:0045216	GO:0045216	cell-cell junction organization	75/4092	209/17320	4.08871e-05	0.000552949	0.000424428	PRKCH/VCL/CDH1/CTNNA1/DSG2/PKN2/RHOA/CBFB/CDC42/WDR1/PRKACA/MPP5/PVR/FSCN1/ACTB/DLG1/PTPN23/ADD1/DSP/TJP1/NUMBL/TGFB1/CAV1/TGFBR1/NECTIN1/PERP/SRF/VEGFA/STRN/PARD6B/ACTN4/NUMB/ROCK2/APC/RDX/ADAM10/MARVELD3/EPHA2/RAB13/PKP4/MTDH/PARD3/MPP7/DLG5/MARVELD2/BMP6/CDH12/CXADR/RHOC/F11R/RUNX1/HIPK1/F2RL1/JAM3/SMAD3/CTNNB1/LIMS1/NLGN2/PDCD6IP/JUP/UGT8/CADM2/NECTIN3/PARD6G/PAK2/F2R/CLDN7/GJC1/ACTG1/PIP5K1C…	75
GO:1903900	GO:1903900	regulation of viral life cycle	58/4092	152/17320	4.11416e-05	0.000555189	0.000426147	KPNA6/EIF2AK2/PKN2/NUCKS1/PABPC1/TSG101/HACD3/CHMP2B/MAVS/CCNK/SRPK1/CHMP4B/VAPA/ZC3HAV1/CAV2/TRIM14/DDX5/HSPA8/SNX3/CHMP3/TRIM32/VPS4B/TRIM25/VAPB/STAU1/TBC1D20/APOBEC3F/EIF2AK4/ILF3/TRIM28/TRIM5/VPS4A/SRPK2/VPS37B/PML/IFITM3/STOM/HMGA2/FBXL2/LARP1/ADAR/PPIB/PHB/TRIM8/RESF1/PDE12/BANF1/TMEM39A/PARP10/KPNA2/IFITM2/P4HB/PPIA/CNOT7/TRIM13/DDX3X/APOBEC3C/PPIE	58
GO:0044839	GO:0044839	cell cycle G2/M phase transition	92/4092	268/17320	4.28977e-05	0.000577639	0.00044338	FBXL3/PAFAH1B1/PSMA4/FOXN3/CUL1/PPP1R12A/TAF2/PSME4/PRKACA/FBXW11/NDE1/CLASP1/DYNC1I2/HSP90AA1/DYNLL1/PSMD5/PSMD8/PSMB5/PSMA6/PSMA7/CDC25B/MAPRE1/PSMD10/PSMD7/RAB11A/NBN/PPP2R1A/PSMA2/CCNY/PSMD3/PSMD11/YWHAE/CCND1/TPD52L1/SKP1/PSMD14/ALMS1/VPS4B/KHDRBS1/CDKN1A/PSMF1/PSMB2/ARPP19/PSMA1/AJUBA/LATS1/TUBG1/PSME3/VPS4A/TAOK3/CDK4/HUS1/PSMB7/HAUS2/ACTR1A/PHLDA1/TP53/CSNK1D/BRD4/APP/PSMA5/ENSA/CETN2/HMG…	92
GO:0006623	GO:0006623	protein targeting to vacuole	21/4092	39/17320	4.38713e-05	0.000589479	0.000452467	M6PR/LAMP2/AP3D1/RAB7A/VTI1B/MON1B/GOSR2/HSPA8/GNPTAB/VAMP7/VPS4A/SCARB2/VPS37B/VTI1A/VPS37A/AP3M1/HGS/SMURF1/AP4M1/NCOA4/VPS13A	21
GO:0006109	GO:0006109	regulation of carbohydrate metabolic process	74/4092	206/17320	4.40783e-05	0.000590989	0.000453627	NDC1/PDK3/TIGAR/PSEN1/NFE2L1/GSK3B/ZMPSTE24/SEH1L/MAEA/NUP50/SIRT1/EP300/HIF1A/NTSR1/AKT2/TGFB1/GSK3A/PRKAG2/NUP88/NFKB1/NUP98/NUP155/NUP43/NUP153/DYRK2/ARPP19/CBFA2T3/SESN2/SELENOS/PRKAA1/NUP54/SCARB2/NUP58/NCOA2/NCOR1/CLTC/TP53/FOXK2/PMAIP1/APP/AKT1/ARNT/SOGA1/FOXO1/RANBP2/ADIPOR1/JMJD8/FOXK1/COX11/MIDN/STAT3/IRS1/PFKFB3/INSR/PGAM1/PPP1CA/PPP1R3B/PTPN2/ZBTB7A/PHLDA2/ZBTB20/PRKAG1/PPARA/SIRT7/PO…	74
GO:1901293	GO:1901293	nucleoside phosphate biosynthetic process	91/4092	265/17320	4.64196e-05	0.000621048	0.000476699	AK2/NADK/ELOVL5/PNKP/RRM2B/KARS1/ME1/ELOVL1/PKM/PDK3/ACSL4/ENO1/VPS9D1/AK6/PDPR/DLD/ACOT7/SCD/TECR/MAPK1/SLC25A1/PRPS2/DHODH/NME4/ACSBG1/TGFB1/NAMPT/GARS1/IMPDH1/PRKAG2/ATP5F1B/ATP5PB/PANK3/ADCY7/ACSL3/ATP5F1E/PANK2/PAICS/PPAT/DCTD/PPT1/ACLY/PDHA1/RFK/ATP5MC2/ADCY3/UCK2/PARP1/SCD5/CBR4/PRPS1/AK3/HSD17B12/ALDOA/ATP5F1A/ATP5MC3/SLC35B2/PINK1/GART/FLAD1/ADCY9/CMPK1/AK4/GMPS/ELOVL7/PDP1/VCP/TK1/STAT3…	91
GO:0016311	GO:0016311	dephosphorylation	153/4092	488/17320	4.69888e-05	0.000627321	0.000481514	PTBP1/PNKP/EIF2AK2/PPP1R12A/WNK1/MTMR1/PPP2R5A/PLPP1/PTPN3/FBXW11/PPP2R2C/DLG1/PTPN23/NT5C2/TIGAR/PPP2R5C/GSK3B/SSH1/MTMR2/FKBP1A/HSP90AB1/PPM1A/APEX1/CDC25B/RPRD1B/PCDH11X/BPNT2/SH2D4A/PPP2CB/URI1/TGFB1/PTPRS/PPP2R1A/MINPP1/SHOC2/MTMR4/PPP1R9B/DUSP3/YWHAE/PPP6R3/CSRNP2/DUSP16/HDDC2/PTP4A1/PHACTR2/PPP2R5D/PPP2CA/GNAI2/PPM1G/SMG7/RCAN3/PPP1R8/SET/PTPA/PPP6C/DUSP4/RPAP2/PTPRB/PTPN12/ARPP19/PUDP/IMP…	153
GO:0002474	GO:0002474	antigen processing and presentation of peptide antigen via MHC class I	41/4092	98/17320	4.8443e-05	0.000645356	0.000495357	HFE/PSMA4/VAMP3/PSME4/SNAP23/PSMD5/PSMD8/PSMB5/PSMA6/SEC23A/PSMA7/PSMD10/PSMD7/PSMA2/PSMD3/PSMD11/LNPEP/SEC24A/PSMD14/PSMF1/PSMB2/CANX/PSMA1/PSME3/PSMB7/SEC31A/SEC24B/PSMA5/MFSD6/SAR1B/PSMC2/B2M/SEC24C/CALR/BCAP31/PSMD12/CHUK/IFI30/IDE/ITGAV/SEC24D	41
GO:0009165	GO:0009165	nucleotide biosynthetic process	90/4092	262/17320	5.02305e-05	0.000667745	0.000512542	AK2/NADK/ELOVL5/PNKP/RRM2B/KARS1/ME1/ELOVL1/PKM/PDK3/ACSL4/ENO1/VPS9D1/AK6/PDPR/DLD/ACOT7/SCD/TECR/MAPK1/SLC25A1/PRPS2/DHODH/NME4/ACSBG1/TGFB1/NAMPT/GARS1/IMPDH1/PRKAG2/ATP5F1B/ATP5PB/PANK3/ADCY7/ACSL3/ATP5F1E/PANK2/PAICS/PPAT/DCTD/PPT1/ACLY/PDHA1/RFK/ATP5MC2/ADCY3/UCK2/PARP1/SCD5/CBR4/PRPS1/AK3/HSD17B12/ALDOA/ATP5F1A/ATP5MC3/SLC35B2/PINK1/GART/FLAD1/ADCY9/CMPK1/AK4/GMPS/ELOVL7/PDP1/VCP/STAT3/FAS…	90
GO:0019076	GO:0019076	viral release from host cell	19/4092	34/17320	5.12636e-05	0.000675728	0.00051867	TSG101/RAB7A/CHMP2B/CHMP4B/VAPA/CAV2/CHMP3/TRIM32/VPS4B/TRIM25/TRIM28/TRIM5/VPS4A/VPS37B/PML/TRIM8/IST1/PPIA/TRIM13	19
GO:0032509	GO:0032509	endosome transport via multivesicular body sorting pathway	19/4092	34/17320	5.12636e-05	0.000675728	0.00051867	VTA1/CHMP2B/CHMP5/CHMP4B/LAPTM4B/LEPROTL1/CHMP3/VPS4B/DENND10/CHMP1A/VPS36/STAM/VPS37B/TMEM50B/CHMP7/VPS37A/VCP/TMEM50A/CHMP1B	19
GO:0035890	GO:0035890	exit from host	19/4092	34/17320	5.12636e-05	0.000675728	0.00051867	TSG101/RAB7A/CHMP2B/CHMP4B/VAPA/CAV2/CHMP3/TRIM32/VPS4B/TRIM25/TRIM28/TRIM5/VPS4A/VPS37B/PML/TRIM8/IST1/PPIA/TRIM13	19
GO:0035891	GO:0035891	exit from host cell	19/4092	34/17320	5.12636e-05	0.000675728	0.00051867	TSG101/RAB7A/CHMP2B/CHMP4B/VAPA/CAV2/CHMP3/TRIM32/VPS4B/TRIM25/TRIM28/TRIM5/VPS4A/VPS37B/PML/TRIM8/IST1/PPIA/TRIM13	19
GO:0098930	GO:0098930	axonal transport	28/4092	59/17320	5.29489e-05	0.000696473	0.000534593	PAFAH1B1/KIF1B/AP3D1/AP3M2/FBXW11/RAB21/HIF1A/KIF3B/BLOC1S6/HSPB1/KIF1C/TERF2/ARL8B/SOD1/SNAPIN/FEZ1/DLG2/DST/AP3S2/NDEL1/KIF5C/KIF5B/AP3S1/TRAK1/AP3M1/MAPT/BLOC1S2/BLOC1S5	28
GO:0070301	GO:0070301	cellular response to hydrogen peroxide	38/4092	89/17320	5.30762e-05	0.000696681	0.000534752	SIRT1/ABL1/APEX1/CST3/MET/SETX/PLEKHA1/PPIF/PDCD10/NFE2L2/PARK7/FOXO3/PRKAA1/KDM6B/STK26/ANXA1/MDM2/TXN/KLF4/RHOB/SIGMAR1/RPS3/FOXO1/MAPK13/PINK1/AXL/RELA/NET1/PAWR/NQO1/PYCR1/HSF1/HDAC2/SRC/PSAP/RACK1/PCGF2/IMPACT	38
GO:1903052	GO:1903052	positive regulation of proteolysis involved in cellular protein catabolic process	50/4092	127/17320	5.32249e-05	0.000697168	0.000535126	GCLC/RNF14/PIAS1/RNF19A/HERPUD1/ATXN3/CHFR/PSEN1/GSK3B/TRIB3/PSMD10/STUB1/SGTA/GSK3A/CAV1/FBXW7/BAG2/CSNK1A1/SUMO1/NFE2L2/CBFA2T3/UBQLN1/MDM2/RNF185/TMTC3/CSNK1D/AKT1/PLK2/RNF217/ZER1/PSMC2/ZYG11B/RCHY1/VCP/ARIH1/FBXO22/PTK2/RNF139/PTEN/TRIB1/FBXW8/ARIH2/SOCS4/TMEM259/BCAP31/UBQLN2/SUMO2/SMURF1/RACK1/CSNK1E	50
GO:0035821	GO:0035821	modulation of process of other organism	45/4092	111/17320	5.38098e-05	0.000703355	0.000539876	EIF2AK2/ATG5/HIPK2/NUCKS1/REST/CCNK/EP300/PABPN1/VAPA/KPNA3/CAV2/KPNB1/HSPA8/GAPDH/KPNA1/HDAC1/TARDBP/ZNF639/VAPB/TBC1D20/EIF2AK4/CCNT1/STOM/HMGA2/BCL2L11/FBXL2/CHD1/RRAGA/RRP1B/SUGT1/PPIB/PHB/SERPINB9/INSR/BCL2L1/CFL1/DAG1/KPNA2/ANXA2/SP1/RXRA/KPNA4/IGF2R/ATG7/PHB2	45
GO:2000637	GO:2000637	positive regulation of gene silencing by miRNA	15/4092	24/17320	5.47338e-05	0.000712676	0.00054703	PUM2/TGFB1/DDX5/FXR1/EIF4G1/AGO2/BMP4/ZFP36/AJUBA/PUM1/TP53/LIMD1/EGFR/STAT3/MAP2K1	15
GO:0006521	GO:0006521	regulation of cellular amino acid metabolic process	29/4092	62/17320	5.4751e-05	0.000712676	0.00054703	PSMA4/ATP2B4/PSME4/COMT/PSMD5/PSMD8/PSMB5/PSMA6/PSMA7/PSMD10/PSMD7/OAZ1/PSMA2/PSMD3/PSMD11/PSMD14/ODC1/PARK7/PSMF1/PSMB2/PSMA1/PSME3/PSMB7/PSMA5/SLC7A11/AZIN1/PSMC2/NQO1/PSMD12	29
GO:0046782	GO:0046782	regulation of viral transcription	30/4092	65/17320	5.60487e-05	0.000728051	0.000558831	RSF1/NUCKS1/REST/POLR2E/EP300/NELFCD/POLR2C/TRIM14/HDAC1/TRIM32/TARDBP/ZNF639/GTF2F1/ZFP36/CCNT1/CDK9/IFITM3/POLR2D/POLR2K/HMGA2/UBP1/CHD1/RRP1B/TRIM8/POLR2L/POLR2A/SP1/SUPT5H/TRIM13/SUPT4H1	30
GO:0002753	GO:0002753	cytoplasmic pattern recognition receptor signaling pathway	31/4092	68/17320	5.68777e-05	0.00073576	0.000564748	TSPAN6/TAB2/PUM2/ITCH/RNF125/XIAP/RIPK2/C1QBP/BIRC2/ERBIN/SEC14L1/ANKRD17/PUM1/MAP3K7/RPS27A/TIFA/UBC/TAB3/CLPB/PHB/UBB/RELA/UBE2N/NPLOC4/IRAK1/PHB2/UBA52/UBE2V1/ZCCHC3/LSM14A/OTULIN	31
GO:0090398	GO:0090398	cellular senescence	31/4092	68/17320	5.68777e-05	0.00073576	0.000564748	WNT16/YBX1/ARG2/KAT6A/ZMPSTE24/SIRT1/ABL1/CDK6/NAMPT/BMPR1A/MAPK14/SRF/ID2/NEK6/CDKN1A/TERF2/KRAS/HMGA1/PML/TP53/PLK2/HMGA2/B2M/MAP2K1/RSL1D1/PAWR/CALR/MAGEA2B/H2AX/ZKSCAN3/MAGEA2	31
GO:0035601	GO:0035601	protein deacylation	43/4092	105/17320	5.89104e-05	0.000760479	0.000583723	ATXN3/SREBF1/BAZ2A/REST/RCOR1/SIRT1/EP300/BRMS1L/TBL1X/SUDS3/VEGFA/HDAC1/LYPLA1/MORF4L2/PPT1/PRKAA1/ABHD17C/ABHD13/TP53/SIRT3/CAMK2D/MIDEAS/DYRK1A/SKI/ELK4/PINK1/CCAR2/CTBP1/SMARCAD1/NIPBL/SPRED1/PHB/SIN3A/TBL1XR1/MORF4L1/MAPT/SIRT7/HDAC2/FLNA/MIER1/SPRED2/C6orf89/SFPQ	43
GO:0006164	GO:0006164	purine nucleotide biosynthetic process	70/4092	194/17320	5.94676e-05	0.00076609	0.000588029	AK2/ELOVL5/ELOVL1/PKM/PDK3/ACSL4/ENO1/VPS9D1/PDPR/DLD/ACOT7/SCD/TECR/SLC25A1/PRPS2/NME4/ACSBG1/TGFB1/IMPDH1/PRKAG2/ATP5F1B/ATP5PB/PANK3/ADCY7/ACSL3/ATP5F1E/PANK2/PAICS/PPAT/PPT1/ACLY/PDHA1/ATP5MC2/ADCY3/PARP1/SCD5/CBR4/PRPS1/AK3/HSD17B12/ALDOA/ATP5F1A/ATP5MC3/SLC35B2/PINK1/GART/ADCY9/AK4/GMPS/ELOVL7/PDP1/VCP/STAT3/FASN/ADORA2B/ELOVL6/PDP2/IMPDH2/PFAS/CYC1/ADA/HACD2/NME1/ATP5MF/NME2/HTD2/ACACA/ADK…	70
GO:0051972	GO:0051972	regulation of telomerase activity	24/4092	48/17320	6.27025e-05	0.000804446	0.00061747	PNKP/XRCC5/HSP90AA1/HSP90AB1/MAPK1/PARP4/PTGES3/CCT4/TCP1/HNRNPA2B1/DKC1/PPARG/MEN1/KLF4/MYC/TP53/NAF1/HMBOX1/NEK7/CCT2/CTNNB1/PARM1/TNKS/SRC	24
GO:2000059	GO:2000059	negative regulation of ubiquitin-dependent protein catabolic process	24/4092	48/17320	6.27025e-05	0.000804446	0.00061747	HFE/HIPK2/CSNK2A2/SENP1/PSEN1/WAC/HSP90AB1/CSNK2A1/USP14/SGTA/PARK7/RPL5/RPL23/SDCBP/PML/RPL11/TLK2/CCAR2/RYBP/CAMLG/BAG5/SMARCC1/STYX/TAF9	24
GO:0048872	GO:0048872	homeostasis of number of cells	87/4092	253/17320	6.36444e-05	0.000814857	0.000625461	KMT2E/FAS/KITLG/RC3H2/HIPK2/SENP1/NFE2L1/RRN3/BAX/ADD1/MAEA/ABL1/RBFOX2/HIF1A/ACIN1/DNAJA3/RPS19/CDK6/LIPA/SH2B3/LPCAT3/MAPK14/SRF/VEGFA/HSPA9/SMAD5/STAT1/ID2/SOS1/EPAS1/PRDX1/FOXO3/PTBP3/FAM210B/BMP4/SOX9/MED1/PRMT1/ZFP36/KRAS/ANXA1/ACVR1B/RC3H1/IREB2/KAT7/RPS24/TMOD3/RB1/PMAIP1/SOD1/AKT1/BCL10/ARNT/UBAP2L/SLC25A38/MFHAS1/SLC7A11/BCL2L11/CEBPG/FANCC/DMTN/ADAR/NCSTN/FLVCR1/SFXN1/RPS14/JAM3/B2M/AX…	87
GO:0035635	GO:0035635	entry of bacterium into host cell	4092-11-01	15/17320	6.5509e-05	0.000833605	0.000639852	CDH1/CBLL1/CAV1/MET/CBL/CTNNB1/GRB2/EXOC7/SRC/CTNND1/ITGAV	11
GO:1903543	GO:1903543	positive regulation of exosomal secretion	4092-11-01	15/17320	6.5509e-05	0.000833605	0.000639852	TSG101/RAB7A/SDC1/VPS4B/SDC4/VPS4A/STAM/SDCBP/ATP13A2/PDCD6IP/HGS	11
GO:1904874	GO:1904874	positive regulation of telomerase RNA localization to Cajal body	4092-11-01	15/17320	6.5509e-05	0.000833605	0.000639852	CCT4/TCP1/DKC1/NAF1/CCT6A/CCT5/CCT8/CCT3/CCT2/RUVBL1/NOP10	11
GO:0009161	GO:0009161	ribonucleoside monophosphate metabolic process	25/4092	51/17320	6.75009e-05	0.000855584	0.000656723	AK2/DLG1/NT5C2/MAGI3/GMPR2/PRPS2/DHODH/IMPDH1/PAICS/PPAT/RFK/NT5E/UCK2/CASK/PRPS1/AK3/DLG2/GART/CMPK1/AK4/GMPS/IMPDH2/PFAS/ADA/ADK	25
GO:0030833	GO:0030833	regulation of actin filament polymerization	63/4092	171/17320	6.75101e-05	0.000855584	0.000656723	BAIAP2L1/TMSB10/CYFIP2/NCKAP1/CTNNA2/RHOA/PFN2/DLG1/CAPZB/SSH1/ADD1/COTL1/MTPN/WASL/KANK1/PFN1/WASF1/ACTR3/SPTBN1/CAPZA1/ABITRAM/VASP/MKKS/CDC42EP1/SNX9/LATS1/ARFIP2/SPIRE1/TMOD1/RDX/ACTR2/ABI2/TMOD3/AP1AR/SSH2/ARF1/ARHGAP18/TWF1/FER/EPS8/JMY/CYRIB/BAG4/WASF2/DMTN/ARPC5/CDC42EP3/ARPC2/ARFIP1/ARF6/GRB2/MYADM/KIRREL1/GMFB/MYO1C/CAPZA2/IQANK1/ARPC1A/BRK1/CYFIP1/ADD2/CRACD/TMOD2	63
GO:0071560	GO:0071560	cellular response to transforming growth factor beta stimulus	82/4092	236/17320	6.80174e-05	0.000860269	0.000660318	CFLAR/CREBBP/ITGA3/STRAP/FUT8/HSPA5/HIPK2/RHOA/PXN/GLG1/HSP90AB1/SIRT1/CRKL/EP300/PPM1A/FERMT1/STUB1/TGFB1/CAV2/CAV1/TGFBR1/BMPR1A/ZMIZ1/MTMR4/SMURF2/CBL/ZNF451/NR3C1/SMAD5/EPB41L5/ACVR1/GOT1/USP9X/SOX9/ID1/TWSG1/SNX6/GDF15/MEN1/MAP3K7/TGFBRAP1/SDCBP/PML/FURIN/PDPK1/ARRB2/TP53/SMAD4/PARP1/RPS27A/PARD3/UBC/ZFP36L2/PTPRK/RNF111/SKI/F11R/ZYX/TGFBR2/CITED2/SPRED1/SMAD3/CRK/ADAM9/PTK2/LIMS1/UBB/SMAD1/…	82
GO:0071383	GO:0071383	cellular response to steroid hormone stimulus	73/4092	205/17320	6.8425e-05	0.000863676	0.000662933	CFLAR/TFPI/FKBP4/CALCOCO1/RNF14/ABCC2/FECH/PLPP1/RHOA/CBFB/ATP2B1/PIAS2/REST/SIRT1/DDX17/RBFOX2/EP300/UBR5/URI1/ZMIZ1/DDX5/NR3C1/UBE3A/ERRFI1/PARK7/HDAC1/ARID1A/FOXO3/CBX3/CNOT1/BMP4/MED1/NR1D1/RNF6/ZFP36/YWHAH/LATS1/WBP2/CLOCK/ANXA1/YAP1/USP8/ABHD2/NCOR1/ARRB2/CARM1/PARP1/CNOT9/EGFR/FOXO1/EIF4E/ZFP36L2/BCL2L11/HNRNPU/PPARGC1B/RUNX1/ATP1A1/HEYL/PGRMC2/CREBRF/PHB/KMT2D/ZBTB7A/CALR/ZFP36L1/UBE2L3/R…	73
GO:0002223	GO:0002223	stimulatory C-type lectin receptor signaling pathway	45/4092	112/17320	6.95706e-05	0.000876365	0.000672673	CREBBP/PSMA4/CUL1/TAB2/PSME4/PRKACA/FBXW11/PSMD5/PSMD8/EP300/PSMB5/PSMA6/PSMA7/PSMD10/PSMD7/PSMA2/PSMD3/PSMD11/NFKB1/SKP1/PSMD14/PSMF1/PSMB2/PSMA1/PSME3/RAF1/KRAS/MAP3K7/PSMB7/PDPK1/BCL10/PRKACB/PSMA5/TAB3/PSMC2/MUC3A/RELA/PAK2/SRC/PSMD12/MUC12/NRAS/CHUK/LYN/RPS6KA5	45
GO:0071985	GO:0071985	multivesicular body sorting pathway	21/4092	40/17320	7.18688e-05	0.000902144	0.00069246	VTA1/CHMP2B/CHMP5/CHMP4B/LAPTM4B/LEPROTL1/CHMP3/VPS4B/DENND10/CHMP1A/VPS36/STAM/VPS37B/TMEM50B/RUBCN/CHMP7/VPS37A/VCP/TMEM50A/CHMP1B/EXPH5	21
GO:1902235	GO:1902235	regulation of endoplasmic reticulum stress-induced intrinsic apoptotic signaling pathway	18/4092	32/17320	7.19058e-05	0.000902144	0.00069246	HERPUD1/ERP29/SIRT1/XBP1/PARK7/TXNDC12/SELENOS/SERINC3/TMBIM6/PMAIP1/HYOU1/BCL2L11/SYVN1/BCL2L1/PTPN2/GRINA/PTPN1/MAGEA3	18
GO:0034614	GO:0034614	cellular response to reactive oxygen species	59/4092	158/17320	7.30441e-05	0.000914588	0.000702012	CFLAR/GLRX2/PXN/SIRT1/ABL1/MAPK1/APEX1/CST3/MET/SETX/PLEKHA1/PPIF/CAMKK2/SOD2/PDCD10/NFE2L2/PARK7/PRDX1/FOXO3/PRKAA1/KDM6B/STK26/ANXA1/MDM2/TXN/KLF4/SIRT3/SOD1/AKT1/RHOB/EGFR/SIGMAR1/RPS3/FOXO1/FER/PTPRK/PPARGC1B/MAPK13/FANCC/PINK1/PRDX3/CRK/AXL/RELA/NET1/PAWR/NQO1/ERCC6L2/PYCR1/HSF1/MAPT/HDAC2/SRC/PSAP/RACK1/CHUK/PCGF2/MPV17/IMPACT	59
GO:0042058	GO:0042058	regulation of epidermal growth factor receptor signaling pathway	37/4092	87/17320	7.32465e-05	0.000915289	0.00070255	GPRC5A/PTPN3/CDC42/TSG101/RAB7A/PSEN1/SNX5/ARHGEF7/DUSP3/AREG/FBXW7/CBL/HBEGF/STAM2/SOS1/ERRFI1/EREG/EPS15L1/HIP1/PTPN12/SNX6/RHBDF2/STAM/APP/AKT1/CNOT9/EGFR/FER/SHC1/TGFA/PTPN2/GRB2/SOCS4/HGS/NUP62/ITGA1/EPS15	37
GO:0046128	GO:0046128	purine ribonucleoside metabolic process	27/4092	57/17320	7.46517e-05	0.000929132	0.000713175	ENPP4/GNAI3/RHOA/DLG1/NT5C2/MAGI3/MTAP/GTPBP1/GMPR2/AHCY/NME4/IMPDH1/RHOQ/AMD1/RAN/NT5E/CASK/AK3/DLG2/AK4/GMPS/IMPDH2/ADA/PNP/NME1/NME2/ADK	27
GO:0061077	GO:0061077	chaperone-mediated protein folding	27/4092	57/17320	7.46517e-05	0.000929132	0.000713175	FKBP4/HSPA5/FKBP1A/FKBP5/ST13/CSNK2A1/SGTA/HSPB1/BAG1/HSPA8/CHORDC1/PTGES3/HSPA9/HSPE1/HSPH1/DNAJB1/HSPA13/PDIA4/DFFA/PEX19/DNAJB14/CCT2/PPIB/CRTAP/HSPA14/ERO1A/SGTB	27
GO:0006893	GO:0006893	Golgi to plasma membrane transport	28/4092	60/17320	7.70443e-05	0.000955028	0.000733053	RABEP1/GOPC/VAMP3/EXOC5/NSF/RAB10/GGA2/GOLPH3/SPTBN1/BLZF1/LYPLA1/ACSL3/ARFGEF2/VAMP7/BBS2/PREPL/GOLPH3L/EXOC6B/GOLGA4/GOLGA7/SEC16A/STEAP2/CNST/RAB31/SYS1/RACK1/RSC1A1/VAMP2	28
GO:0042278	GO:0042278	purine nucleoside metabolic process	28/4092	60/17320	7.70443e-05	0.000955028	0.000733053	ENPP4/GNAI3/RHOA/DLG1/NT5C2/MAGI3/MTAP/GTPBP1/GMPR2/AHCY/NME4/IMPDH1/RHOQ/AMD1/OARD1/RAN/NT5E/CASK/AK3/DLG2/AK4/GMPS/IMPDH2/ADA/PNP/NME1/NME2/ADK	28
GO:1903203	GO:1903203	regulation of oxidative stress-induced neuron death	16/4092	27/17320	7.74945e-05	0.000955028	0.000733053	REST/FBXO7/HIF1A/FBXW7/LANCL1/PARK7/ATF4/MCL1/PARP1/NONO/SLC7A11/PINK1/OXR1/CTNNB1/ATG7/RACK1	16
GO:0019042	GO:0019042	viral latency	4092-09-01	11/17320	7.78024e-05	0.000955028	0.000733053	NUCKS1/XRCC5/HMGA1/XRCC4/PSIP1/HCFC1/BANF1/PPIA/XRCC6	9
GO:0090481	GO:0090481	pyrimidine nucleotide-sugar transmembrane transport	4092-09-01	11/17320	7.78024e-05	0.000955028	0.000733053	SLC35C2/SLC35A2/SLC35A3/SLC35B1/SLC35D2/SLC35A5/SLC35A1/SLC35A4/SLC35B4	9
GO:1904869	GO:1904869	regulation of protein localization to Cajal body	4092-09-01	11/17320	7.78024e-05	0.000955028	0.000733053	CCT4/TCP1/DKC1/CCT6A/MEPCE/CCT5/CCT8/CCT3/CCT2	9
GO:1904871	GO:1904871	positive regulation of protein localization to Cajal body	4092-09-01	11/17320	7.78024e-05	0.000955028	0.000733053	CCT4/TCP1/DKC1/CCT6A/MEPCE/CCT5/CCT8/CCT3/CCT2	9
GO:0000281	GO:0000281	mitotic cytokinesis	32/4092	72/17320	7.99262e-05	0.000977258	0.000750116	TTC19/RHOA/CHMP2B/CHMP5/EFHC1/CHMP4B/LZTS2/RAB35/CENPA/SPTBN1/CHMP3/STMN1/VPS4B/SNX9/CHMP1A/VPS4A/MYH10/ROCK2/APC/CKAP2/NUSAP1/USP8/ARF1/RHOB/CHMP7/RHOC/SON/PDCD6IP/CFL1/SNX18/NUP62/CHMP1B	32
GO:0046902	GO:0046902	regulation of mitochondrial membrane permeability	32/4092	72/17320	7.99262e-05	0.000977258	0.000750116	GCLC/SLC25A5/BID/GSK3B/BAX/PPP1R13B/MUL1/BNIP3L/GSK3A/PPIF/YWHAE/TFDP2/ATF2/RHOT1/YWHAH/YWHAQ/NMT1/TP53/PMAIP1/DYNLT1/BCL2L11/HK2/YWHAZ/YWHAB/STAT3/YWHAG/BCL2L1/BLOC1S2/TFDP1/SLC35F6/PPP3R1/THEM4	32
GO:0061640	GO:0061640	cytoskeleton-dependent cytokinesis	41/4092	100/17320	8.39317e-05	0.00102423	0.000786169	TTC19/RHOA/CHMP2B/CHMP5/EFHC1/CHMP4B/LZTS2/RAB35/ACTR3/CENPA/SPTBN1/CHMP3/STMN1/VPS4B/SEPTIN7/SNX9/CHMP1A/VPS4A/MYH10/SPIRE1/ROCK2/APC/CKAP2/NUSAP1/ACTR2/USP8/SEPTIN11/ARF1/RHOB/CHMP7/RHOC/SON/SEPTIN2/PDCD6IP/CFL1/SNX18/IST1/SEPTIN9/SEPTIN10/NUP62/CHMP1B	41
GO:0010389	GO:0010389	regulation of G2/M transition of mitotic cell cycle	70/4092	196/17320	8.59688e-05	0.00104704	0.000803681	PAFAH1B1/PSMA4/FOXN3/CUL1/PSME4/PRKACA/NDE1/CLASP1/DYNC1I2/HSP90AA1/DYNLL1/PSMD5/PSMD8/PSMB5/PSMA6/PSMA7/CDC25B/MAPRE1/PSMD10/PSMD7/RAB11A/NBN/PPP2R1A/PSMA2/PSMD3/PSMD11/YWHAE/CCND1/SKP1/PSMD14/ALMS1/VPS4B/CDKN1A/PSMF1/PSMB2/PSMA1/TUBG1/PSME3/VPS4A/TAOK3/CDK4/HUS1/PSMB7/HAUS2/ACTR1A/CSNK1D/BRD4/APP/PSMA5/CETN2/HMGA2/RAD17/DONSON/TAOK1/MRNIP/PSMC2/RAD21/TUBA1A/MECP2/SIN3A/YWHAG/DCTN2/RCC2/PBX1/PSM…	70
GO:0043414	GO:0043414	macromolecule methylation	102/4092	308/17320	8.67598e-05	0.00105462	0.000809497	CREBBP/KMT2E/JARID2/KMT2C/BAZ2A/RIF1/ZMPSTE24/MECOM/DIMT1/METTL2A/SIRT1/SETD1A/SNRPD3/TTLL12/PRMT5/RNMT/CTCF/SETD6/GSPT1/RAB3D/GSK3A/CBLL1/NSD2/KMT5B/PRDM4/ICMT/ASH1L/RLF/RBBP5/NSUN4/KMT2A/FAM98A/HELLS/PCMT1/ETF1/MRM2/ZC3H13/METTL8/MTRR/SNRPB/PRMT1/EMG1/METTL16/NSUN5/TRIM28/DNMT1/MEN1/MBD2/THUMPD3/PWP1/NIBAN2/MYC/RTF1/SETD1B/WDR61/SMAD4/BRD4/CARM1/PARP1/SETD7/WTAP/MEPCE/NSD3/TDRD9/PAXIP1/BTG2/CHT…	102
GO:1902275	GO:1902275	regulation of chromatin organization	69/4092	193/17320	9.27488e-05	0.00112523	0.000863696	KMT2E/JARID2/ATG5/SREBF1/RIF1/ZMPSTE24/SIRT1/SETD1A/CTCF/UBR5/ZNF451/VEGFA/PARK7/KMT2A/UBE2B/SET/LIF/TRIM28/DNMT1/WBP2/PPHLN1/KAT7/CDK9/HMGA1/ARRB1/RTF1/WDR61/GLYR1/TP53/SMAD4/BRD4/CAMK2D/SETD7/TLK2/NSD3/MKI67/SSRP1/HNRNPU/PAXIP1/SKI/PINK1/CTBP1/CHTOP/LMNA/PYGO2/NIPBL/NSD1/BRD7/CTNNB1/SETD5/MECP2/SIN3A/ATF7IP/RESF1/UBE2N/PARP10/SPTY2D1/NOC2L/H1-0/MIER1/TLK1/C6orf89/CTR9/PARG/EID1/RPS6KA5/ASF1A/MT…	69
GO:0034315	GO:0034315	regulation of Arp2/3 complex-mediated actin nucleation	13/4092	20/17320	9.77235e-05	0.001181	0.000906502	NCKAP1/CTNNA2/WASL/WASF1/ARFIP2/ABI2/AP1AR/ARF1/WASF2/ARFIP1/GMFB/BRK1/CYFIP1	13
GO:1900151	GO:1900151	regulation of nuclear-transcribed mRNA catabolic process, deadenylation-dependent decay	13/4092	20/17320	9.77235e-05	0.001181	0.000906502	PABPC1/TNRC6A/TNRC6B/TENT4A/TENT4B/AGO2/CNOT1/ZFP36/TOB1/ZFP36L2/BTG2/ZFP36L1/CNOT7	13
GO:0030041	GO:0030041	actin filament polymerization	68/4092	190/17320	0.000100054	0.00120451	0.000924545	BAIAP2L1/TMSB10/ARHGAP6/TTC17/CYFIP2/NCKAP1/CTNNA2/RHOA/PFN2/DLG1/CAPZB/SSH1/ADD1/COTL1/MTPN/WASL/KANK1/PFN1/WASF1/ACTR3/SPTBN1/CAPZA1/ABITRAM/VASP/MKKS/CDC42EP1/SNX9/LATS1/DIAPH1/ARFIP2/SPIRE1/RAC1/TMOD1/RDX/ACTR2/ABI2/TMOD3/AP1AR/SSH2/ARF1/ARHGAP18/TWF1/FER/EPS8/PSTPIP2/JMY/CYRIB/BAG4/WASF2/DMTN/ARPC5/CDC42EP3/ARPC2/ARFIP1/ARF6/GRB2/MYADM/KIRREL1/GMFB/MYO1C/CAPZA2/IQANK1/ARPC1A/BRK1/CYFIP1/ADD2…	68
GO:0071897	GO:0071897	DNA biosynthetic process	68/4092	190/17320	0.000100054	0.00120451	0.000924545	POLDIP2/LIG3/REV3L/PNKP/XRCC5/HSP90AA1/HNRNPC/HSP90AB1/SIRT1/MAPK1/PARP4/USP10/CHRAC1/POLD2/TNKS2/PTGES3/CCT4/TCP1/TRIM25/TENT4B/HNRNPA2B1/CDKN1A/GNL3L/DKC1/PPARG/RPA1/TERF2/RFC3/MEN1/HNRNPA1/KLF4/NIBAN2/MYC/ARRB2/TP53/RPS27A/NAF1/CCT6A/HMBOX1/POLE3/CCT5/UBC/NEK7/HNRNPU/CCT8/CCT3/RCHY1/VCP/WRN/CCT2/PHB/TK1/CTNNB1/CHTF8/PARM1/UBB/POLH/DCP2/TNKS/PARP10/NOP10/NPLOC4/PPIA/SRC/TFDP1/SYCP1/BMPR2/UBA52	68
GO:0071480	GO:0071480	cellular response to gamma radiation	17/4092	30/17320	0.000100805	0.00120889	0.00092791	HSPA5/XRCC5/ZMPSTE24/TMEM109/EGR1/CDKN1A/ELK1/MDM2/YAP1/TP53/TLK2/RPL26/WRN/BCL2L1/HSF1/H2AX/XRCC6	17
GO:1902253	GO:1902253	regulation of intrinsic apoptotic signaling pathway by p53 class mediator	17/4092	30/17320	0.000100805	0.00120889	0.00092791	CD44/RRM2B/RRN3/SIRT1/MDM2/MARCHF7/TP53/RPL11/ZNF385A/RPL26/MSX1/HNRNPK/UBB/TRIAP1/PTTG1IP/TAF9B/TAF9	17
GO:0008637	GO:0008637	apoptotic mitochondrial changes	47/4092	120/17320	0.000101935	0.00122009	0.000936507	GCLC/SLC25A5/BID/VPS35/GSK3B/BAX/PPP1R13B/MUL1/PSMD10/PIM2/PPP2CB/BNIP3L/GSK3A/PPIF/YWHAE/SOD2/TFDP2/ATF2/RHOT1/YWHAH/YWHAQ/CIDEB/NMT1/ARRB2/TP53/PMAIP1/AKT1/HSPD1/ATG3/BCL2L11/PINK1/CCAR2/HK2/LMNA/YWHAZ/YWHAB/MFF/PRELID1/YWHAG/TRIAP1/BCL2L1/BLOC1S2/TFDP1/SLC35F6/PPP3R1/GPX1/THEM4	47
GO:1902905	GO:1902905	positive regulation of supramolecular fiber organization	72/4092	204/17320	0.000105336	0.0012584	0.000965911	BAIAP2L1/NCKAP1/CTNNA2/RHOA/PFN2/CDC42/WDR1/CLASP1/DLG1/PSEN1/PXN/ABL1/MAPRE1/MET/WASL/LIMK1/TGFBR1/PFN1/SLAIN2/WASF1/ACTR3/SDC4/VASP/DSTN/ID1/CDC42EP1/COLGALT1/SNX9/CLIP1/ARFIP2/SWAP70/SPIRE1/ROCK2/RAC1/ACTR2/ABI2/AP1AR/RB1/APP/ARF1/EPHA1/RPS3/FER/JMY/RHOC/BAG4/WASF2/ARPC5/CDC42EP3/ARPC2/ARFIP1/F2RL1/CFL2/ARF6/SMAD3/MECP2/CFL1/SH3PXD2B/GRB2/KIRREL1/DRG1/NF2/MAPT/FLNA/GMFB/MYO1C/GPX1/ARPC1A/BRK1/…	72
GO:0010639	GO:0010639	negative regulation of organelle organization	129/4092	407/17320	0.000105666	0.00125992	0.000967083	GCLC/FKBP4/SLC25A5/JARID2/ZNF207/TMSB10/ARHGAP6/MAP4/LIMA1/ATG5/WAPL/CTNNA2/PFN2/TFRC/CLASP1/LMAN1/RAB7A/CAPZB/TIGAR/XRCC5/SSH1/HUWE1/ADD1/MUL1/HNRNPC/SIRT1/MAPRE1/CHMP4B/PSMD10/MID1/TJP1/NBN/UBR5/ANKRD27/MTPN/MET/KANK1/TNKS2/PPIF/PFN1/VAT1/PRKAR1A/ZNF451/SPTBN1/CAPZA1/STMN1/CAMSAP2/UBE2B/SET/TENT4B/BMP4/MKKS/LIF/PSMG2/GNL3L/CAMSAP1/DNMT1/H3-3B/TERF2/SWAP70/APC/HNRNPA1/CKAP2/TBC1D4/TMOD1/HMGA1/RD…	129
GO:0060147	GO:0060147	regulation of posttranscriptional gene silencing	46/4092	117/17320	0.000107995	0.0012828	0.000984642	PUM2/NDC1/ELAVL1/ZMPSTE24/SEH1L/TNRC6A/AGO1/NUP50/POLR2E/POLR2C/TGFB1/NUP88/DDX5/NUP98/NUP155/FXR1/EIF4G1/NUP43/AGO2/XPO5/NUP153/BMP4/ZFP36/AJUBA/PPARG/H3-3B/PUM1/NUP54/PPP3CA/NUP58/NCOR1/TP53/POLR2D/LIMD1/EGFR/POLR2K/RANBP2/ADAR/STAT3/MAP2K1/POLR2L/POLR2A/POM121/NUP62/POM121C/H3-3A	46
GO:0060966	GO:0060966	regulation of gene silencing by RNA	46/4092	117/17320	0.000107995	0.0012828	0.000984642	PUM2/NDC1/ELAVL1/ZMPSTE24/SEH1L/TNRC6A/AGO1/NUP50/POLR2E/POLR2C/TGFB1/NUP88/DDX5/NUP98/NUP155/FXR1/EIF4G1/NUP43/AGO2/XPO5/NUP153/BMP4/ZFP36/AJUBA/PPARG/H3-3B/PUM1/NUP54/PPP3CA/NUP58/NCOR1/TP53/POLR2D/LIMD1/EGFR/POLR2K/RANBP2/ADAR/STAT3/MAP2K1/POLR2L/POLR2A/POM121/NUP62/POM121C/H3-3A	46
GO:0000245	GO:0000245	spliceosomal complex assembly	27/4092	58/17320	0.000108442	0.00128566	0.000986839	GCFC2/YTHDC1/SRPK1/SF3A1/CRNKL1/SF3A2/SETX/PRPF19/SRSF9/SF3B1/SRSF6/KHDC4/SRPK2/SRSF1/SCAF11/TXNL4A/SNRNP200/LUC7L2/RBMX/CELF1/SLU7/PSIP1/SNRPD1/SF1/USP39/PRPF39/SRSF10	27
GO:0031669	GO:0031669	cellular response to nutrient levels	76/4092	218/17320	0.000108779	0.00128721	0.000988029	LAMP2/HFE/CYP24A1/RRAGD/FAS/GABARAPL2/RIPOR1/HSPA5/EIF2AK2/ATG5/ATP2B1/SREBF1/SESN1/SEH1L/TNRC6A/COMT/SIRT1/SH3GLB1/MAPK1/XBP1/STK24/HNRNPL/NAMPT/PRKAG2/HSPA8/CBL/SRF/EIF4G1/NFE2L2/RRAGC/SLC2A1/FOXO3/CDKN1A/MED1/MAX/BECN1/ATG14/ATF4/EIF2AK4/SESN2/PPARG/PRKAA1/EIF2S1/SLC38A2/STK26/DSC2/HNRNPA1/MDM2/GLUL/GABARAPL1/MAP1LC3B/TP53/RPTOR/WDR45B/PMAIP1/XPR1/SESN3/FADS1/FOXO1/KLF10/RRAGA/WIPI2/ATF3/WRN/F…	76
GO:0010970	GO:0010970	transport along microtubule	59/4092	160/17320	0.000109779	0.0012966	0.00099523	PAFAH1B1/IFT88/KIF1B/AP3D1/AP3M2/CDC42/FBXW11/NDE1/DYNC1I2/RAB21/TNPO1/DYNLL1/HIF1A/TRIP11/KIF3B/SPG11/BLOC1S6/HSPB1/ARHGAP21/HSPA8/CILK1/WASF1/SSX2IP/MREG/VAMP7/DYNLRB1/RHOT1/KIF1C/FLOT2/TERF2/ARL8B/RAB1A/SOD1/APP/SNAPIN/FEZ1/DLG2/DST/BAG3/HNRNPU/AP3S2/SUN1/NDEL1/KIF5C/UBB/KIF5B/RAB6A/AP3S1/TRAK1/AP3M1/PURA/LAMP1/BICD2/MAPT/BLOC1S2/DYNLL2/IFT52/SFPQ/BLOC1S5	59
GO:1903051	GO:1903051	negative regulation of proteolysis involved in cellular protein catabolic process	32/4092	73/17320	0.000110336	0.00130072	0.000998393	HFE/GABARAPL2/HIPK2/ERLEC1/CSNK2A2/DERL2/SENP1/PSEN1/WAC/HSP90AB1/CSNK2A1/USP14/SGTA/PARK7/RPL5/RPL23/PSMF1/UBAC2/MARCHF7/SDCBP/PML/RPL11/TLK2/CCAR2/RYBP/CAMLG/BAG5/SMARCC1/UBE2G2/STYX/UBE2J1/TAF9	32
GO:0006278	GO:0006278	RNA-dependent DNA biosynthetic process	31/4092	70/17320	0.000111473	0.00131165	0.00100678	PNKP/XRCC5/HSP90AA1/HNRNPC/HSP90AB1/MAPK1/TNKS2/PTGES3/CCT4/TCP1/TENT4B/GNL3L/DKC1/RPA1/TERF2/HNRNPA1/NAF1/CCT6A/HMBOX1/CCT5/NEK7/HNRNPU/CCT8/CCT3/CCT2/CTNNB1/DCP2/TNKS/NOP10/PPIA/SRC	31
GO:0072665	GO:0072665	protein localization to vacuole	30/4092	67/17320	0.000111953	0.00131482	0.00100922	M6PR/LAMP2/AP3D1/RAB7A/GPR137B/SH3GLB1/VTI1B/MON1B/GOSR2/HSPA8/CD81/GNPTAB/RTN4/VAMP7/SH3BP4/VPS4A/ROCK2/VPS36/STAM/SCARB2/VPS37B/VTI1A/VPS37A/ATP13A2/AP3M1/HGS/SMURF1/AP4M1/NCOA4/VPS13A	30
GO:0046825	GO:0046825	regulation of protein export from nucleus	21/4092	41/17320	0.000114672	0.00134422	0.00103179	PRKACA/GSK3B/XPO1/RBM22/PPM1A/YWHAE/PARK7/XPO5/XPO4/MDM2/TXN/ANP32B/TP53/TCF7L2/BAG3/PTPN14/UHMK1/PTPN11/SETD2/SIRT7/EMD	21
GO:0006476	GO:0006476	protein deacetylation	39/4092	95/17320	0.000119656	0.00140001	0.00107461	ATXN3/SREBF1/BAZ2A/REST/RCOR1/SIRT1/EP300/BRMS1L/TBL1X/SUDS3/VEGFA/HDAC1/MORF4L2/PRKAA1/TP53/SIRT3/CAMK2D/MIDEAS/DYRK1A/SKI/ELK4/PINK1/CCAR2/CTBP1/SMARCAD1/NIPBL/SPRED1/PHB/SIN3A/TBL1XR1/MORF4L1/MAPT/SIRT7/HDAC2/FLNA/MIER1/SPRED2/C6orf89/SFPQ	39
GO:0010952	GO:0010952	positive regulation of peptidase activity	68/4092	191/17320	0.000119947	0.00140081	0.00107522	CFLAR/BID/FAS/CYFIP2/KARS1/RHOA/PSME4/PDCD2/PICALM/SENP1/REST/BAX/MUL1/SIRT1/BCL2L13/RIPK2/TNFRSF10A/CAV1/CASP2/MAPK14/PERP/PSMD14/HSPE1/TNFRSF10B/HIP1/PSME3/PPARG/ROCK2/KHDC1/CIDEB/TANK/ANP32B/MYC/MTCH1/ARRB1/PML/PMAIP1/APP/BCL10/HSPD1/ARL6IP5/RPS3/BCL2L11/XDH/PINK1/VCP/SMAD3/STAT3/PRELID1/ANTXR1/USP50/CYCS/ACER2/F2R/DIABLO/RPS27L/HSF1/BCAP31/MAPT/CLDN4/HMGB1/MBP/ASPH/RACK1/DDX3X/PDCD6/LYN/CARD8	68
GO:0016052	GO:0016052	carbohydrate catabolic process	70/4092	198/17320	0.000122913	0.00143276	0.00109974	FUT8/NDC1/PHKA1/PKM/ENO1/TIGAR/PGM1/PSEN1/SEH1L/NUP50/EP300/HIF1A/PGK1/GPI/GSK3A/PRKAG2/NUP88/MANBA/NUP98/GAPDH/TPI1/NUP155/GPD2/NUP43/NUP153/CBFA2T3/PRKAA1/LDHA/NUP54/SCARB2/NUP58/SORD/NCOR1/TP53/FOXK2/APP/PGD/ARNT/ABHD10/ALDOA/PFKM/RANBP2/ADPGK/HK2/JMJD8/NEU3/FOXK1/NUDT5/STAT3/GLB1/PFKFB3/INSR/PGAM1/PPP1CA/FUT10/PPP1R3B/ZBTB7A/ZBTB20/PRKAG1/PPARA/ENO4/POM121/GM2A/CALM1/NUP62/PPP1CB/EIF6/POM121C…	70
GO:1904872	GO:1904872	regulation of telomerase RNA localization to Cajal body	4092-12-01	18/17320	0.000128113	0.0014906	0.00114414	CCT4/TCP1/DKC1/NAF1/CCT6A/CCT5/CCT8/CCT3/CCT2/DCP2/RUVBL1/NOP10	12
GO:0048511	GO:0048511	rhythmic process	100/4092	304/17320	0.000134559	0.00156269	0.00119948	NFYA/CREBBP/MYCBP2/FBXL3/HSPA5/THRAP3/OPN3/SREBF1/FBXW11/GSK3B/HUWE1/GNA11/SIRT1/SRRD/EP300/PRMT5/ADNP/CSNK2A1/CST3/AHCY/HNRNPL/NAMPT/CASP2/AHR/SETX/PLEKHA1/RAI1/DDX5/FBXW7/UBE3A/ID2/HDAC1/RPE65/KDM5B/KMT2A/FOXO3/EGR1/TARDBP/CBX3/USP9X/EREG/HNRNPR/ID1/KDM5C/NR1D1/ATF4/JUND/PPARG/PRKAA1/ROCK2/CLOCK/CDK4/ARRB1/NCOA2/PML/ZFHX3/NCOR1/ARRB2/TP53/CSNK1D/PAM/EGFR/NONO/HTR7/HNRNPU/KLF10/GNAQ/DYRK1A/CCAR2…	100
GO:1900408	GO:1900408	negative regulation of cellular response to oxidative stress	23/4092	47/17320	0.000135246	0.00156484	0.00120113	REST/SIRT1/FBXO7/HIF1A/MET/HSPB1/SOD2/NFE2L2/PARK7/ATF4/TXN/AKT1/NONO/SLC7A11/PINK1/OXR1/BAG5/CTNNB1/PYCR1/ATG7/PSAP/RACK1/GPX1	23
GO:1903202	GO:1903202	negative regulation of oxidative stress-induced cell death	23/4092	47/17320	0.000135246	0.00156484	0.00120113	REST/SIRT1/FBXO7/HIF1A/MET/HSPB1/SOD2/NFE2L2/PARK7/ATF4/TXN/AKT1/NONO/SLC7A11/PINK1/OXR1/BAG5/CTNNB1/PYCR1/ATG7/PSAP/RACK1/GPX1	23
GO:0030010	GO:0030010	establishment of cell polarity	53/4092	141/17320	0.000136077	0.00157155	0.00120628	PAFAH1B1/MAP4/RHOA/CDC42/MPP5/MARK2/FBXW11/NDE1/CLASP1/FSCN1/HSP90AA1/GSK3B/RAB10/HSP90AB1/CRKL/MYH9/FERMT1/SIPA1L3/KANK1/RAB11FIP2/GBF1/BCCIP/SLC9A3R1/PTK7/GOLPH3/WWC1/AMOTL2/CENPA/RAP1B/FLOT2/ROCK2/SNX27/WDPCP/DYNLT1/MSN/PARD3/FEZ1/MPP7/ITGB1/CYRIB/ARF6/AMOTL1/JAM3/NDEL1/CRK/PTK2/CFL1/RNF41/SHTN1/RACK1/UBXN2B/MYO9A/MAD2L1	53
GO:0051258	GO:0051258	protein polymerization	98/4092	297/17320	0.000137374	0.00158249	0.00121467	FKBP4/BAIAP2L1/RANBP9/ZNF207/TMSB10/ARHGAP6/TTC17/CYFIP2/NCKAP1/CTNNA2/RHOA/PFN2/NDE1/CLASP1/DLG1/CAPZB/UBE2K/HSP90AA1/SSH1/ADD1/ABL1/MAPRE1/CHMP4B/COTL1/MTPN/MET/WASL/KANK1/PFN1/SLAIN2/WASF1/ACTR3/SPTBN1/CHMP3/CAPZA1/STMN1/CAMSAP2/ABITRAM/VASP/MKKS/CDC42EP1/SNX9/CAMSAP1/CLIP1/LATS1/TUBG1/DIAPH1/ARFIP2/SPIRE1/RAC1/TMOD1/RDX/TUBGCP4/ACTR2/ABI2/TMOD3/AP1AR/SSH2/CSNK1D/PRUNE1/ARF1/ARHGAP18/RPS3/TWF1…	98
GO:0043281	GO:0043281	regulation of cysteine-type endopeptidase activity involved in apoptotic process	73/4092	209/17320	0.000137531	0.00158249	0.00121467	CFLAR/BID/FAS/CD44/HERPUD1/RHOA/PDCD2/SENP1/REST/BAX/MUL1/RFFL/SIRT1/BCL2L13/CSNK2A1/XIAP/TNFRSF10A/DNAJB6/CASP2/YWHAE/BIRC2/VEGFA/HSPE1/DHCR24/PARK7/TNFRSF10B/HIP1/RAF1/PPARG/KHDC1/MDM2/KLF4/ANP32B/MYC/MTCH1/ARRB1/PML/ARRB2/PMAIP1/AKT1/BCL10/HSPD1/ARL6IP5/RPS3/BCL2L11/SH3RF1/XDH/VCP/PRDX3/SMAD3/ARL6IP1/SERPINB9/RNF34/TRIAP1/CYCS/ACER2/PAK2/F2R/SIAH2/DIABLO/RPS27L/HSF1/BCAP31/MAPT/HMGB1/SRC/RACK1…	73
GO:0090559	GO:0090559	regulation of membrane permeability	35/4092	83/17320	0.000139217	0.00159895	0.00122731	GCLC/SLC25A5/BID/GSK3B/BAX/PPP1R13B/MUL1/LAPTM4B/BNIP3L/GSK3A/PPIF/YWHAE/TFDP2/ATF2/RHOT1/YWHAH/YWHAQ/NMT1/TP53/PMAIP1/DYNLT1/BCL2L11/F11R/HK2/YWHAZ/YWHAB/STAT3/YWHAG/PDCD6IP/BCL2L1/BLOC1S2/TFDP1/SLC35F6/PPP3R1/THEM4	35
GO:0150115	GO:0150115	cell-substrate junction organization	41/4092	102/17320	0.000141544	0.00162269	0.00124553	VCL/ARHGAP6/RHOA/MAP4K4/ACTN1/CLASP1/TRIP6/ITGA6/ABL1/ARHGEF7/DUSP3/CORO1C/VEGFA/EPB41L5/SDC4/AJUBA/ROCK2/LAMC1/RAC1/PDPK1/PIP5K1A/WDPCP/IQSEC1/PHLDB2/DST/PTPRK/DMTN/ARF6/SMAD3/MAPRE2/PTK2/LIMS1/PTEN/PEAK1/CD151/PLEC/RCC2/ACTG1/SRC/LDB1/SLK	41
GO:0006110	GO:0006110	regulation of glycolytic process	34/4092	80/17320	0.000143508	0.0016422	0.0012605	NDC1/TIGAR/PSEN1/SEH1L/NUP50/EP300/HIF1A/PRKAG2/NUP88/NUP98/NUP155/NUP43/NUP153/CBFA2T3/PRKAA1/NUP54/NUP58/NCOR1/APP/ARNT/RANBP2/JMJD8/STAT3/PFKFB3/INSR/PGAM1/ZBTB7A/ZBTB20/PRKAG1/PPARA/POM121/NUP62/EIF6/POM121C	34
GO:0051973	GO:0051973	positive regulation of telomerase activity	19/4092	36/17320	0.000144177	0.00164684	0.00126407	PNKP/XRCC5/HSP90AA1/HSP90AB1/MAPK1/PTGES3/CCT4/TCP1/HNRNPA2B1/DKC1/KLF4/MYC/NAF1/HMBOX1/NEK7/CCT2/CTNNB1/PARM1/TNKS	19
GO:0002220	GO:0002220	innate immune response activating cell surface receptor signaling pathway	45/4092	115/17320	0.000145264	0.0016532	0.00126895	CREBBP/PSMA4/CUL1/TAB2/PSME4/PRKACA/FBXW11/PSMD5/PSMD8/EP300/PSMB5/PSMA6/PSMA7/PSMD10/PSMD7/PSMA2/PSMD3/PSMD11/NFKB1/SKP1/PSMD14/PSMF1/PSMB2/PSMA1/PSME3/RAF1/KRAS/MAP3K7/PSMB7/PDPK1/BCL10/PRKACB/PSMA5/TAB3/PSMC2/MUC3A/RELA/PAK2/SRC/PSMD12/MUC12/NRAS/CHUK/LYN/RPS6KA5	45
GO:0051261	GO:0051261	protein depolymerization	45/4092	115/17320	0.000145264	0.0016532	0.00126895	LIMA1/KIF2A/WDR1/CLASP1/CAPZB/ADD1/MID1/MTPN/PPP1R9B/HSPA8/SPTBN1/CAPZA1/STMN1/CAMSAP2/VPS4B/DSTN/CAMSAP1/VPS4A/SWAP70/MICAL2/APC/CKAP2/TMOD1/RDX/TMOD3/SH3GL1/TWF1/EPS8/CCSAP/DMTN/TAOK1/ATXN7/F2RL1/MID1IP1/CFL2/BMERB1/CFL1/KIF24/ASPH/CAPZA2/IQANK1/ADD2/CRACD/TMOD2/MICAL1	45
GO:0030705	GO:0030705	cytoskeleton-dependent intracellular transport	70/4092	199/17320	0.000146374	0.0016628	0.00127632	PAFAH1B1/IFT88/KIF1B/AP3D1/AP3M2/CDC42/FBXW11/NDE1/DYNC1I2/RAB21/TNPO1/DYNLL1/HIF1A/TRIP11/KIF3B/SPG11/BLOC1S6/HSPB1/WASL/ARHGAP21/HSPA8/CILK1/WASF1/SSX2IP/MREG/TUBA1B/VAMP7/DYNLRB1/RHOT1/KIF1C/ACTN4/FLOT2/TERF2/ARL8B/FNBP1L/RAB1A/SOD1/APP/SNAPIN/FEZ1/DLG2/DST/BAG3/HNRNPU/AP3S2/SUN1/NDEL1/TUBA1A/TUBA1C/KIF5C/UBB/KIF5B/TANC2/MYO1H/RAB6A/AP3S1/TRAK1/AP3M1/PURA/LAMP1/BICD2/MAPT/BLOC1S2/MYO1C/DYNLL2/…	70
GO:0034390	GO:0034390	smooth muscle cell apoptotic process	14/4092	23/17320	0.000146989	0.00166375	0.00127705	MAP2K4/LRP6/SIRT1/STK4/SOD2/E2F3/MFN2/ATF4/DNMT1/PPARG/ARRB1/ARRB2/PDCD4/DIPK2A	14
GO:0034391	GO:0034391	regulation of smooth muscle cell apoptotic process	14/4092	23/17320	0.000146989	0.00166375	0.00127705	MAP2K4/LRP6/SIRT1/STK4/SOD2/E2F3/MFN2/ATF4/DNMT1/PPARG/ARRB1/ARRB2/PDCD4/DIPK2A	14
GO:0032210	GO:0032210	regulation of telomere maintenance via telomerase	25/4092	53/17320	0.000148563	0.00167247	0.00128374	PNKP/XRCC5/HNRNPC/MAPK1/TNKS2/CCT4/TCP1/TENT4B/GNL3L/DKC1/TERF2/HNRNPA1/NAF1/CCT6A/HMBOX1/CCT5/NEK7/HNRNPU/CCT8/CCT3/CCT2/CTNNB1/DCP2/TNKS/SRC	25
GO:0035384	GO:0035384	thioester biosynthetic process	25/4092	53/17320	0.000148563	0.00167247	0.00128374	ELOVL5/ELOVL1/PDK3/ACSL4/PDPR/DLD/SCD/TECR/SLC25A1/ACSBG1/ACSL3/PPT1/ACLY/PDHA1/SCD5/CBR4/HSD17B12/ELOVL7/PDP1/FASN/ELOVL6/PDP2/HACD2/HTD2/ACACA	25
GO:0071616	GO:0071616	acyl-CoA biosynthetic process	25/4092	53/17320	0.000148563	0.00167247	0.00128374	ELOVL5/ELOVL1/PDK3/ACSL4/PDPR/DLD/SCD/TECR/SLC25A1/ACSBG1/ACSL3/PPT1/ACLY/PDHA1/SCD5/CBR4/HSD17B12/ELOVL7/PDP1/FASN/ELOVL6/PDP2/HACD2/HTD2/ACACA	25
GO:1902749	GO:1902749	regulation of cell cycle G2/M phase transition	74/4092	213/17320	0.000150429	0.00169044	0.00129753	PAFAH1B1/PSMA4/FOXN3/CUL1/PSME4/PRKACA/NDE1/CLASP1/DYNC1I2/HSP90AA1/DYNLL1/PSMD5/PSMD8/PSMB5/PSMA6/PSMA7/CDC25B/MAPRE1/PSMD10/PSMD7/RAB11A/NBN/PPP2R1A/PSMA2/PSMD3/PSMD11/YWHAE/CCND1/SKP1/PSMD14/ALMS1/VPS4B/CDKN1A/PSMF1/PSMB2/PSMA1/TUBG1/PSME3/VPS4A/TAOK3/CDK4/HUS1/PSMB7/HAUS2/ACTR1A/TP53/CSNK1D/BRD4/APP/PSMA5/CETN2/HMGA2/RAD17/PAXIP1/DONSON/TAOK1/MRNIP/PSMC2/ABRAXAS1/RAD21/TUBA1A/MECP2/SIN3A/YWHA…	74
GO:0090068	GO:0090068	positive regulation of cell cycle process	95/4092	287/17320	0.000151677	0.0017014	0.00130595	CDC27/KMT2E/DBF4/WIZ/CUL3/PKN2/RHOA/CDC42/PRKACA/CNOT4/BAX/PCBP4/CDC23/EP300/APEX1/CDC25B/KIF3B/RAB11A/MED25/CASP2/CCND1/CNOT6/TFDP2/KLHL18/EIF4G1/ID2/ARID3A/PLAGL1/UBE2B/VPS4B/CDKN1A/SOX4/EREG/CNOT1/MED1/RPL23/PRMT1/BECN1/ANKRD17/ROCK2/CDC73/ANXA1/CDK4/MDM2/RDX/NUSAP1/TMOD3/CNOT6L/RB1/PML/TP53/RPTOR/BRD4/APP/AKT1/CARM1/PKP4/CNOT9/PLK2/EGFR/MEPCE/HMGA2/HNRNPU/CNOT8/CUL4B/CNOT11/BTG2/CXCR5/ZNF385A…	95
GO:1902686	GO:1902686	mitochondrial outer membrane permeabilization involved in programmed cell death	27/4092	59/17320	0.000155264	0.0017373	0.0013335	GCLC/SLC25A5/BID/GSK3B/BAX/PPP1R13B/MUL1/BNIP3L/GSK3A/PPIF/YWHAE/TFDP2/ATF2/RHOT1/YWHAH/YWHAQ/NMT1/TP53/PMAIP1/BCL2L11/YWHAZ/YWHAB/YWHAG/BLOC1S2/TFDP1/SLC35F6/PPP3R1	27
GO:0007004	GO:0007004	telomere maintenance via telomerase	30/4092	68/17320	0.000155433	0.0017373	0.0013335	PNKP/XRCC5/HSP90AA1/HNRNPC/HSP90AB1/MAPK1/TNKS2/PTGES3/CCT4/TCP1/TENT4B/GNL3L/DKC1/RPA1/TERF2/HNRNPA1/NAF1/CCT6A/HMBOX1/CCT5/NEK7/HNRNPU/CCT8/CCT3/CCT2/CTNNB1/DCP2/TNKS/NOP10/SRC	30
GO:0016601	GO:0016601	Rac protein signal transduction	20/4092	39/17320	0.000162689	0.00180907	0.00138859	NCKAP1/HACD3/WASF1/SSX2IP/RAC2/KRAS/RAC1/ABI2/ARHGAP17/DYNLT1/EPS8/TIAM1/WASF2/ARF6/GARRE1/CRK/RHOG/NF1/BRK1/CYFIP1	20
GO:0098732	GO:0098732	macromolecule deacylation	43/4092	109/17320	0.000163013	0.00180907	0.00138859	ATXN3/SREBF1/BAZ2A/REST/RCOR1/SIRT1/EP300/BRMS1L/TBL1X/SUDS3/VEGFA/HDAC1/LYPLA1/MORF4L2/PPT1/PRKAA1/ABHD17C/ABHD13/TP53/SIRT3/CAMK2D/MIDEAS/DYRK1A/SKI/ELK4/PINK1/CCAR2/CTBP1/SMARCAD1/NIPBL/SPRED1/PHB/SIN3A/TBL1XR1/MORF4L1/MAPT/SIRT7/HDAC2/FLNA/MIER1/SPRED2/C6orf89/SFPQ	43
GO:0098781	GO:0098781	ncRNA transcription	43/4092	109/17320	0.000163013	0.00180907	0.00138859	CCNT2/CCNK/POLR2E/RPRD1B/POLR2C/TAF6/SPIN1/NCBP2/NCL/GTF3C2/ELL2/RPAP2/GTF3C4/POLR1B/GTF2F1/IPPK/CCNT1/NOL11/USPL1/PWP1/CDK9/INTS14/GTF2A2/RPRD1A/TP53/POU2F1/POLR2D/MEPCE/POLR2K/TAF5/GTF2E1/NIFK/RPRD2/ICE1/SNAPC3/GTF2A1/SNAPC5/CAVIN1/POLR2L/POLR2A/SP1/SIRT7/TAF9	43
GO:2000278	GO:2000278	regulation of DNA biosynthetic process	43/4092	109/17320	0.000163013	0.00180907	0.00138859	PNKP/XRCC5/HSP90AA1/HNRNPC/HSP90AB1/MAPK1/PARP4/TNKS2/PTGES3/CCT4/TCP1/TENT4B/HNRNPA2B1/CDKN1A/GNL3L/DKC1/PPARG/TERF2/RFC3/MEN1/HNRNPA1/KLF4/NIBAN2/MYC/ARRB2/TP53/NAF1/CCT6A/HMBOX1/CCT5/NEK7/HNRNPU/CCT8/CCT3/CCT2/CTNNB1/CHTF8/PARM1/DCP2/TNKS/SRC/TFDP1/BMPR2	43
GO:1903541	GO:1903541	regulation of exosomal secretion	4092-11-01	16/17320	0.000164681	0.00182434	0.00140031	TSG101/RAB7A/SDC1/VPS4B/SDC4/VPS4A/STAM/SDCBP/ATP13A2/PDCD6IP/HGS	11
GO:0007569	GO:0007569	cell aging	42/4092	106/17320	0.000172379	0.00190623	0.00146317	WNT16/YBX1/ARG2/KAT6A/ZMPSTE24/SIRT1/ABL1/DNAJA3/CDK6/NAMPT/BMPR1A/ZMIZ1/MAPK14/SRF/ID2/NEK6/CDKN1A/TERF2/KRAS/HMGA1/PML/TP53/SOD1/PLK2/HMGA2/PDCD4/LMNA/WRN/B2M/MAP2K1/LIMS1/RSL1D1/PTEN/PAWR/CALR/NPM1/MAGEA2B/H2AX/ZKSCAN3/MARCHF5/NUP62/MAGEA2	42
GO:0018196	GO:0018196	peptidyl-asparagine modification	17/4092	31/17320	0.000174205	0.00192303	0.00147606	FUT8/ST6GAL1/LMAN1/MAGT1/RPN2/DAD1/STT3A/DPM2/STT3B/RPN1/HIF1AN/MCFD2/UBE2J1/OSTC/OST4/DDOST/MGAT2	17
GO:0031333	GO:0031333	negative regulation of protein-containing complex assembly	52/4092	139/17320	0.00017991	0.0019825	0.00152171	FKBP4/TMSB10/HSPA5/VPS35/PFN2/CDC42/CAPZB/GSK3B/SSH1/ADD1/TFIP11/EP300/PPM1A/MAPRE1/ANKRD27/MTPN/KANK1/DKK1/PFN1/BIRC2/SPTBN1/PARK7/CAPZA1/STMN1/MKKS/RAF1/TMOD1/STXBP1/RDX/TMOD3/SSH2/RPL13A/TWF1/EPS8/CYRIB/DYRK1A/DMTN/VDAC2/JAM3/MYADM/CLDN7/HSF1/AIDA/HMGB1/SRC/CAPZA2/IQANK1/DDX3X/ADD2/CRACD/TMOD2/IMPACT	52
GO:0002758	GO:0002758	innate immune response-activating signal transduction	45/4092	116/17320	0.00018363	0.00201638	0.00154772	CREBBP/PSMA4/CUL1/TAB2/PSME4/PRKACA/FBXW11/PSMD5/PSMD8/EP300/PSMB5/PSMA6/PSMA7/PSMD10/PSMD7/PSMA2/PSMD3/PSMD11/NFKB1/SKP1/PSMD14/PSMF1/PSMB2/PSMA1/PSME3/RAF1/KRAS/MAP3K7/PSMB7/PDPK1/BCL10/PRKACB/PSMA5/TAB3/PSMC2/MUC3A/RELA/PAK2/SRC/PSMD12/MUC12/NRAS/CHUK/LYN/RPS6KA5	45
GO:1903828	GO:1903828	negative regulation of cellular protein localization	45/4092	116/17320	0.00018363	0.00201638	0.00154772	GOPC/PPP2R5A/POLR1A/ERLEC1/VPS35/DERL2/PICALM/LMAN1/GSK3B/DNAJA1/FERMT1/LEPROTL1/TGFB1/LZTS2/TMEM59/PARK7/RHOQ/LYPLA1/NUMB/ROCK2/UBAC2/TMBIM1/ABHD17C/TXN/CLTC/MFHAS1/ASTN2/BAG3/BAG4/DMTN/AP2M1/ARF6/PKIG/SIN3A/BCL2L1/UBE2G2/MAPT/CHP1/NF1/ILRUN/UBE2J1/GDI1/UBXN2B/RSC1A1/OTUD7B	45
GO:0060968	GO:0060968	regulation of gene silencing	51/4092	136/17320	0.000192784	0.00211318	0.00162202	PUM2/NDC1/ELAVL1/ZMPSTE24/SEH1L/TNRC6A/AGO1/NUP50/POLR2E/POLR2C/TGFB1/NUP88/DDX5/NUP98/NUP155/FXR1/EIF4G1/NUP43/AGO2/XPO5/NUP153/BMP4/ZFP36/AJUBA/PPARG/H3-3B/PUM1/HMGA1/NUP54/PPP3CA/NUP58/NCOR1/TP53/POLR2D/LIMD1/EGFR/POLR2K/RANBP2/ADAR/STAT3/MAP2K1/SIN3A/POLR2L/POLR2A/H1-0/POM121/MIER1/NUP62/POM121C/ASF1A/H3-3A	51
GO:0018107	GO:0018107	peptidyl-threonine phosphorylation	44/4092	113/17320	0.000195128	0.00213513	0.00163886	WNK1/HIPK2/CSNK2A2/PRKACA/MARK2/UBE2K/GSK3B/MAPK1/CSNK2A1/RIPK2/TGFB1/GSK3A/PRKAG2/TGFBR1/HIPK3/PPP2R5D/EIF4G1/ACVR1/DYRK2/ROCK2/ACVR1B/CAB39/MAP3K12/PDPK1/RPTOR/APP/AKT1/CALM2/DCAF1/CAMK2D/PARD3/DYRK1A/DMTN/CALM3/HIPK1/TGFBR2/LMTK2/SPRED1/MAP2K1/OXSR1/TNKS/SPRED2/STK39/CALM1	44
GO:0060324	GO:0060324	face development	23/4092	48/17320	0.000201985	0.0022063	0.0016935	LRP6/MAPK1/EP300/ZFAND5/PLEKHA1/DKK1/SRF/RAB3GAP1/HOXB3/MKKS/RRAS/RARA/RAF1/SKI/MSX1/TIPARP/NIPBL/SGPL1/ANKRD11/MAP2K1/PTPN11/ALDH1A3/ASPH	23
GO:0006353	GO:0006353	DNA-templated transcription, termination	32/4092	75/17320	0.000203924	0.00220774	0.0016946	POLR1A/ZMPSTE24/XRN2/PAPOLA/POLR2E/SNRPD3/PRMT5/PABPN1/CSTF1/POLR1F/SETX/GTF2H3/NCBP2/POLR1B/SNRPB/WDR33/ZNF473/POLR2K/CPSF7/SCAF4/SSU72/SLBP/TAF1D/NUDT21/POLR1C/CSTF3/CAVIN1/CSTF2T/POLR2L/POLR2A/SCAF8/CPSF2	32
GO:0032212	GO:0032212	positive regulation of telomere maintenance via telomerase	18/4092	34/17320	0.000204442	0.00220774	0.0016946	PNKP/XRCC5/MAPK1/TNKS2/CCT4/TCP1/DKC1/HNRNPA1/NAF1/CCT6A/HMBOX1/CCT5/NEK7/CCT8/CCT3/CCT2/CTNNB1/TNKS	18
GO:0035278	GO:0035278	miRNA mediated inhibition of translation	4092-10-01	14/17320	0.000205651	0.00220774	0.0016946	TNRC6A/AGO1/TNRC6B/EIF4G1/AGO2/AGO3/ZFP36/STAT3/RBM4/EIF6	10
GO:0040033	GO:0040033	negative regulation of translation, ncRNA-mediated	4092-10-01	14/17320	0.000205651	0.00220774	0.0016946	TNRC6A/AGO1/TNRC6B/EIF4G1/AGO2/AGO3/ZFP36/STAT3/RBM4/EIF6	10
GO:0043558	GO:0043558	regulation of translational initiation in response to stress	4092-10-01	14/17320	0.000205651	0.00220774	0.0016946	EIF2AK2/EIF2AK1/DNAJC3/ATF4/EIF2AK4/EIF2S1/PPP1R15B/PPP1CA/NPM1/IMPACT	10
GO:0045974	GO:0045974	regulation of translation, ncRNA-mediated	4092-10-01	14/17320	0.000205651	0.00220774	0.0016946	TNRC6A/AGO1/TNRC6B/EIF4G1/AGO2/AGO3/ZFP36/STAT3/RBM4/EIF6	10
GO:0110154	GO:0110154	RNA decapping	4092-10-01	14/17320	0.000205651	0.00220774	0.0016946	DCPS/ZFP36/PAN3/PATL1/DCP2/EDC3/PNRC2/CNOT7/DCP1A/LSM1	10
GO:0110156	GO:0110156	methylguanosine-cap decapping	4092-10-01	14/17320	0.000205651	0.00220774	0.0016946	DCPS/ZFP36/PAN3/PATL1/DCP2/EDC3/PNRC2/CNOT7/DCP1A/LSM1	10
GO:1904814	GO:1904814	regulation of protein localization to chromosome, telomeric region	4092-10-01	14/17320	0.000205651	0.00220774	0.0016946	CCT4/TCP1/GNL3L/DKC1/CCT6A/CCT5/CCT8/CCT3/GNL3/CCT2	10
GO:1990173	GO:1990173	protein localization to nucleoplasm	4092-10-01	14/17320	0.000205651	0.00220774	0.0016946	CCT4/TCP1/DKC1/CCT6A/MEPCE/CCT5/TBRG1/CCT8/CCT3/CCT2	10
GO:1902850	GO:1902850	microtubule cytoskeleton organization involved in mitosis	53/4092	143/17320	0.000206141	0.00220921	0.00169573	PAFAH1B1/ZNF207/MAP4/RHOA/KIF2A/SMC1A/FBXW11/NDE1/CLASP1/CHMP2B/CHMP5/EFHC1/KIF3B/CHMP4B/XIAP/STAG2/RAB11A/BCCIP/KPNB1/CENPA/STMN1/STAG1/PTPA/VPS4B/SBDS/GNAI1/CHMP1A/TUBG1/RAN/NUSAP1/CLTC/PLK2/DYNLT1/TACC1/ITGB1/HNRNPU/CCSAP/ABRAXAS1/VCP/ABRAXAS2/NDEL1/MECP2/TNKS/DCTN2/RCC1/SETD2/DRG1/FLNA/NUP62/UBXN2B/CHMP1B/MAD2L1/TBCE	53
GO:0150116	GO:0150116	regulation of cell-substrate junction organization	29/4092	66/17320	0.000216671	0.00231808	0.00177929	VCL/ARHGAP6/RHOA/MAP4K4/CLASP1/ABL1/DUSP3/CORO1C/VEGFA/EPB41L5/SDC4/ROCK2/RAC1/WDPCP/IQSEC1/PHLDB2/DMTN/ARF6/SMAD3/MAPRE2/PTK2/LIMS1/PTEN/PEAK1/RCC2/ACTG1/SRC/LDB1/SLK	29
GO:1902110	GO:1902110	positive regulation of mitochondrial membrane permeability involved in apoptotic process	26/4092	57/17320	0.000218114	0.00232954	0.00178809	GCLC/SLC25A5/BID/GSK3B/BAX/PPP1R13B/MUL1/BNIP3L/GSK3A/YWHAE/TFDP2/ATF2/RHOT1/YWHAH/YWHAQ/NMT1/TP53/PMAIP1/BCL2L11/YWHAZ/YWHAB/YWHAG/BLOC1S2/TFDP1/SLC35F6/PPP3R1	26
GO:0070059	GO:0070059	intrinsic apoptotic signaling pathway in response to endoplasmic reticulum stress	28/4092	63/17320	0.000218701	0.00233182	0.00178984	HERPUD1/UBE2K/BAX/ERP29/SIRT1/XBP1/TRIB3/PARK7/TXNDC12/TNFRSF10B/ATF4/SELENOS/SERINC3/TMBIM6/PML/TP53/PMAIP1/HYOU1/BCL2L11/SYVN1/BCL2L1/PTPN2/GRINA/PTPN1/ERO1A/MAGEA3/SELENOK/ERN1	28
GO:0030865	GO:0030865	cortical cytoskeleton organization	27/4092	60/17320	0.000219262	0.00233382	0.00179137	PAFAH1B1/AKAP11/EHD2/NCKAP1/RHOA/WDR1/DLG1/EPB41L1/EZR/RND3/RHOQ/PLS1/RAC2/VPS4A/ROCK2/RAC1/RHOF/RAB13/RHOB/RHOC/FMNL2/EPB41/ARF6/PDCD6IP/RHOG/CALR/STRIP1	27
GO:0048284	GO:0048284	organelle fusion	52/4092	140/17320	0.000221293	0.00235142	0.00180489	SYT7/ZDHHC6/VAMP3/GNAI3/SYT1/TFRC/ENO1/RAB7A/CHMP2B/HUWE1/BAX/MUL1/SNAP23/SNAP29/VTI1B/SPG11/ANKRD27/AKT2/RAB3A/CAV2/CHCHD3/GOSR2/GOSR1/VAT1/STX2/CHMP3/MFN2/VAMP7/VPS4A/ANXA1/STX6/TGFBRAP1/TBC1D4/STXBP1/STX17/USO1/RAB13/SNAPIN/VTI1A/ATP13A2/RAB8B/STX3/RAB8A/MFF/KIF5B/VCPIP1/CALR/MIGA1/ANXA2/ANKFY1/ENO4/VAMP2	52
GO:2000116	GO:2000116	regulation of cysteine-type endopeptidase activity	79/4092	233/17320	0.000225274	0.00238966	0.00183424	CFLAR/BID/FAS/CD44/HERPUD1/CYFIP2/RHOA/PDCD2/SENP1/REST/BAX/MUL1/RFFL/SIRT1/BCL2L13/CSNK2A1/XIAP/RIPK2/TNFRSF10A/DNAJB6/CASP2/YWHAE/BIRC2/PERP/VEGFA/HSPE1/DHCR24/PARK7/TNFRSF10B/HIP1/RAF1/PPARG/KHDC1/MDM2/CIDEB/KLF4/ANP32B/MYC/MTCH1/ARRB1/PML/ARRB2/PMAIP1/AKT1/BCL10/HSPD1/ARL6IP5/RPS3/BCL2L11/SH3RF1/XDH/VCP/PRDX3/SMAD3/USP50/ARL6IP1/SERPINB9/RNF34/TRIAP1/CYCS/ACER2/PAK2/F2R/SIAH2/DIABLO/RPS27L/HS…	79
GO:0009167	GO:0009167	purine ribonucleoside monophosphate metabolic process	19/4092	37/17320	0.000231026	0.00244239	0.00187471	AK2/DLG1/NT5C2/MAGI3/GMPR2/IMPDH1/PAICS/PPAT/NT5E/CASK/AK3/DLG2/GART/AK4/GMPS/IMPDH2/PFAS/ADA/ADK	19
GO:1904358	GO:1904358	positive regulation of telomere maintenance via telomere lengthening	19/4092	37/17320	0.000231026	0.00244239	0.00187471	PNKP/XRCC5/MAPK1/TNKS2/CCT4/TCP1/HNRNPA2B1/DKC1/HNRNPA1/NAF1/CCT6A/HMBOX1/CCT5/NEK7/CCT8/CCT3/CCT2/CTNNB1/TNKS	19
GO:0006983	GO:0006983	ER overload response	4092-09-01	12/17320	0.000245507	0.00256277	0.00196711	HSPA5/GSK3B/CCDC47/SELENOS/TP53/TMCO1/ATG10/BCL2L11/PPP1R15B	9
GO:0015780	GO:0015780	nucleotide-sugar transmembrane transport	4092-09-01	12/17320	0.000245507	0.00256277	0.00196711	SLC35C2/SLC35A2/SLC35A3/SLC35B1/SLC35D2/SLC35A5/SLC35A1/SLC35A4/SLC35B4	9
GO:0060213	GO:0060213	positive regulation of nuclear-transcribed mRNA poly(A) tail shortening	4092-09-01	12/17320	0.000245507	0.00256277	0.00196711	PABPC1/TNRC6A/TNRC6B/AGO2/CNOT1/ZFP36/TOB1/BTG2/CNOT7	9
GO:0070202	GO:0070202	regulation of establishment of protein localization to chromosome	4092-09-01	12/17320	0.000245507	0.00256277	0.00196711	CCT4/TCP1/DKC1/CCT6A/CCT5/CCT8/CCT3/SPIDR/CCT2	9
GO:1903405	GO:1903405	protein localization to nuclear body	4092-09-01	12/17320	0.000245507	0.00256277	0.00196711	CCT4/TCP1/DKC1/CCT6A/MEPCE/CCT5/CCT8/CCT3/CCT2	9
GO:1904867	GO:1904867	protein localization to Cajal body	4092-09-01	12/17320	0.000245507	0.00256277	0.00196711	CCT4/TCP1/DKC1/CCT6A/MEPCE/CCT5/CCT8/CCT3/CCT2	9
GO:0060964	GO:0060964	regulation of gene silencing by miRNA	44/4092	114/17320	0.000245939	0.00256277	0.00196711	PUM2/NDC1/ELAVL1/ZMPSTE24/SEH1L/TNRC6A/AGO1/NUP50/POLR2E/POLR2C/TGFB1/NUP88/DDX5/NUP98/NUP155/FXR1/EIF4G1/NUP43/AGO2/NUP153/BMP4/ZFP36/AJUBA/PPARG/H3-3B/PUM1/NUP54/PPP3CA/NUP58/NCOR1/TP53/POLR2D/LIMD1/EGFR/POLR2K/RANBP2/STAT3/MAP2K1/POLR2L/POLR2A/POM121/NUP62/POM121C/H3-3A	44
GO:0030970	GO:0030970	retrograde protein transport, ER to cytosol	16/4092	29/17320	0.000246105	0.00256277	0.00196711	HERPUD1/ERLEC1/SEL1L/DERL2/FAF2/SELENOS/UBAC2/DERL1/RHBDD1/SYVN1/VCP/HSP90B1/NPLOC4/UBE2G2/BCAP31/UBE2J1	16
GO:1903513	GO:1903513	endoplasmic reticulum to cytosol transport	16/4092	29/17320	0.000246105	0.00256277	0.00196711	HERPUD1/ERLEC1/SEL1L/DERL2/FAF2/SELENOS/UBAC2/DERL1/RHBDD1/SYVN1/VCP/HSP90B1/NPLOC4/UBE2G2/BCAP31/UBE2J1	16
GO:0010631	GO:0010631	epithelial cell migration	94/4092	287/17320	0.000249116	0.00258981	0.00198787	ITGA3/PIK3C2A/STRAP/MAP2K3/ATP2B4/PKN2/RHOA/PFN2/MAP4K4/CLASP1/SEMA3A/PTPN23/PXN/SIRT1/ABL1/MYH9/HIF1A/FERMT1/RAB11A/GPI/TGFB1/MET/HSPB1/TGFBR1/KANK1/PFN1/FBXW7/CORO1C/ATP5F1B/SRF/VEGFA/HBEGF/PDCD10/EPB41L5/RTN4/NFE2L2/LGALS8/NR4A1/RREB1/BMP4/SOX9/ID1/RRAS/PPARG/RAB25/ROCK2/ANXA1/GLUL/KLF4/PRCP/DNAJA4/MARVELD3/PDPK1/AKT1/EPHA2/RAB13/RHOB/WDPCP/IQSEC1/PTPRG/PLK2/ITGB1/DOCK1/ATP5F1A/NUS1/PAXIP1/ADI…	94
GO:0009126	GO:0009126	purine nucleoside monophosphate metabolic process	20/4092	40/17320	0.000253509	0.00262239	0.00201287	AK2/DLG1/NT5C2/MAGI3/GMPR2/IMPDH1/PAICS/PPAT/NT5E/CASK/AK3/DLG2/GART/AK4/GMPS/IMPDH2/PFAS/ADA/ADK/DCK	20
GO:0042307	GO:0042307	positive regulation of protein import into nucleus	20/4092	40/17320	0.000253509	0.00262239	0.00201287	CDH1/IPO5/PSEN1/RBM22/MAVS/HSP90AB1/MAPK1/NUTF2/UBR5/TGFB1/PIK3R2/MAPK14/TARDBP/TRIM28/RAN/PIK3R1/BAG3/SMAD3/JUP/FLNA	20
GO:1902895	GO:1902895	positive regulation of pri-miRNA transcription by RNA polymerase II	20/4092	40/17320	0.000253509	0.00262239	0.00201287	SREBF1/HIF1A/KLF5/TGFB1/BMPR1A/SRF/NR3C1/FOXO3/EGR1/PPARG/KLF4/TP53/GNL3/SMAD3/STAT3/SMAD1/RELA/FOSL1/TEAD1/SREBF2	20
GO:0009060	GO:0009060	aerobic respiration	34/4092	82/17320	0.000253929	0.0026224	0.00201288	COX10/COX15/CS/MTFR1/DLD/ACO2/HIF1A/COX6A1/MTFR1L/DLST/ACO1/PANK2/COX7C/CBFA2T3/PDHA1/SUCLA2/IREB2/IDH1/UQCRC2/SIRT3/SDHC/MDH2/OXA1L/UQCRB/VCP/IDH3A/CYCS/UQCRH/COX8A/SHMT2/UQCR10/NDUFA4/SDHD/IDE	34
GO:0045069	GO:0045069	regulation of viral genome replication	39/4092	98/17320	0.00026004	0.00268107	0.00205792	EIF2AK2/PKN2/NUCKS1/PABPC1/HACD3/MAVS/CCNK/SRPK1/VAPA/ZC3HAV1/DDX5/HSPA8/VAPB/STAU1/TBC1D20/APOBEC3F/EIF2AK4/ILF3/TRIM28/SRPK2/IFITM3/STOM/HMGA2/FBXL2/LARP1/ADAR/PPIB/PHB/RESF1/PDE12/BANF1/TMEM39A/PARP10/IFITM2/PPIA/CNOT7/DDX3X/APOBEC3C/PPIE	39
GO:0007084	GO:0007084	mitotic nuclear envelope reassembly	4092-08-01	10/17320	0.00027165	0.00277663	0.00213126	PPP2R1A/PPP2CA/LMNA/REEP3/BANF1/ANKLE2/PPP2R2A/EMD	8
GO:1904851	GO:1904851	positive regulation of establishment of protein localization to telomere	4092-08-01	10/17320	0.00027165	0.00277663	0.00213126	CCT4/TCP1/DKC1/CCT6A/CCT5/CCT8/CCT3/CCT2	8
GO:0030521	GO:0030521	androgen receptor signaling pathway	21/4092	43/17320	0.000271768	0.00277663	0.00213126	FKBP4/RNF14/PLPP1/RHOA/PIAS2/SIRT1/DDX17/EP300/ZMIZ1/DDX5/UBE3A/PARK7/HDAC1/ARID1A/RNF6/NCOR1/ARRB2/HEYL/PHB/ZBTB7A/TMF1	21
GO:0090670	GO:0090670	RNA localization to Cajal body	4092-12-01	19/17320	0.000272864	0.00277663	0.00213126	CCT4/TCP1/DKC1/NAF1/CCT6A/CCT5/CCT8/CCT3/CCT2/DCP2/RUVBL1/NOP10	12
GO:0090671	GO:0090671	telomerase RNA localization to Cajal body	4092-12-01	19/17320	0.000272864	0.00277663	0.00213126	CCT4/TCP1/DKC1/NAF1/CCT6A/CCT5/CCT8/CCT3/CCT2/DCP2/RUVBL1/NOP10	12
GO:0090672	GO:0090672	telomerase RNA localization	4092-12-01	19/17320	0.000272864	0.00277663	0.00213126	CCT4/TCP1/DKC1/NAF1/CCT6A/CCT5/CCT8/CCT3/CCT2/DCP2/RUVBL1/NOP10	12
GO:0090685	GO:0090685	RNA localization to nucleus	4092-12-01	19/17320	0.000272864	0.00277663	0.00213126	CCT4/TCP1/DKC1/NAF1/CCT6A/CCT5/CCT8/CCT3/CCT2/DCP2/RUVBL1/NOP10	12
GO:1990182	GO:1990182	exosomal secretion	4092-12-01	19/17320	0.000272864	0.00277663	0.00213126	TSG101/RAB7A/RAB11A/SDC1/VPS4B/SDC4/VPS4A/STAM/SDCBP/ATP13A2/PDCD6IP/HGS	12
GO:0032469	GO:0032469	endoplasmic reticulum calcium ion homeostasis	14/4092	24/17320	0.000276147	0.00280092	0.0021499	HERPUD1/PSEN1/BAX/CCDC47/RAP1GDS1/TMBIM6/PML/APP/TMCO1/CAMK2D/ATP2A2/GRINA/BCAP31/SELENOK	14
GO:0045324	GO:0045324	late endosome to vacuole transport	14/4092	24/17320	0.000276147	0.00280092	0.0021499	VTA1/CHMP2B/CHMP5/CHMP4B/LEPROTL1/CHMP3/BECN1/CHMP1A/VPS36/STAM/TMEM50B/CHMP7/TMEM50A/CHMP1B	14
GO:0006479	GO:0006479	protein methylation	64/4092	182/17320	0.000277612	0.00280667	0.00215432	CREBBP/KMT2E/JARID2/KMT2C/RIF1/MECOM/SIRT1/SETD1A/SNRPD3/TTLL12/PRMT5/CTCF/SETD6/GSPT1/RAB3D/NSD2/KMT5B/PRDM4/ICMT/ASH1L/RLF/RBBP5/KMT2A/FAM98A/PCMT1/ETF1/SNRPB/PRMT1/DNMT1/MEN1/PWP1/RTF1/SETD1B/WDR61/SMAD4/BRD4/CARM1/SETD7/NSD3/PAXIP1/BTG2/CHTOP/LMNA/DPY30/PYGO2/WDR82/NSD1/KMT2D/CTNNB1/SETD5/TET2/MECP2/RAB3B/FAM98B/RAB6A/SUZ12/SETD2/SIRT7/TET3/CTR9/MTF2/SUV39H2/PAXBP1/EEF1AKMT2	64
GO:0008213	GO:0008213	protein alkylation	64/4092	182/17320	0.000277612	0.00280667	0.00215432	CREBBP/KMT2E/JARID2/KMT2C/RIF1/MECOM/SIRT1/SETD1A/SNRPD3/TTLL12/PRMT5/CTCF/SETD6/GSPT1/RAB3D/NSD2/KMT5B/PRDM4/ICMT/ASH1L/RLF/RBBP5/KMT2A/FAM98A/PCMT1/ETF1/SNRPB/PRMT1/DNMT1/MEN1/PWP1/RTF1/SETD1B/WDR61/SMAD4/BRD4/CARM1/SETD7/NSD3/PAXIP1/BTG2/CHTOP/LMNA/DPY30/PYGO2/WDR82/NSD1/KMT2D/CTNNB1/SETD5/TET2/MECP2/RAB3B/FAM98B/RAB6A/SUZ12/SETD2/SIRT7/TET3/CTR9/MTF2/SUV39H2/PAXBP1/EEF1AKMT2	64
GO:1901983	GO:1901983	regulation of protein acetylation	31/4092	73/17320	0.000281968	0.0028461	0.00218459	ATG5/GSK3B/ZMPSTE24/SIRT1/CTCF/ZNF451/PARK7/KMT2A/SET/SOX4/LIF/PRKAA1/WBP2/KAT7/ARRB1/GLYR1/SMAD4/PAXIP1/CTBP1/TAOK1/PYGO2/BRD7/SETD5/SIN3A/MAGEA2B/NOC2L/HDAC2/DDX3X/EID1/MAGEA2/RPS6KA5	31
GO:1902904	GO:1902904	negative regulation of supramolecular fiber organization	54/4092	148/17320	0.0002855	0.00287711	0.00220839	FKBP4/TMSB10/ARHGAP6/LIMA1/CTNNA2/PFN2/CLASP1/CAPZB/SSH1/ADD1/MAPRE1/MID1/TJP1/MTPN/MET/KANK1/PFN1/HSPA8/SPTBN1/CAPZA1/STMN1/CAMSAP2/MKKS/LDLR/CAMSAP1/SWAP70/APC/CKAP2/TMOD1/RDX/TMOD3/SSH2/SMAD4/PHLDB2/TWF1/EPS8/CYRIB/DYRK1A/WASF2/F11R/DMTN/TAOK1/ATXN7/MID1IP1/BMERB1/MYADM/PAK2/GMFB/CAPZA2/IQANK1/SHANK3/ADD2/CRACD/TMOD2	54
GO:0010632	GO:0010632	regulation of epithelial cell migration	76/4092	224/17320	0.000286229	0.00287981	0.00221046	ITGA3/PIK3C2A/STRAP/MAP2K3/ATP2B4/RHOA/PFN2/MAP4K4/CLASP1/SEMA3A/PTPN23/SIRT1/ABL1/HIF1A/RAB11A/GPI/TGFB1/MET/HSPB1/PFN1/FBXW7/CORO1C/ATP5F1B/VEGFA/HBEGF/PDCD10/EPB41L5/RTN4/NFE2L2/RREB1/BMP4/SOX9/RRAS/PPARG/RAB25/ROCK2/ANXA1/GLUL/KLF4/PRCP/DNAJA4/MARVELD3/PDPK1/AKT1/EPHA2/RHOB/IQSEC1/PTPRG/PLK2/DOCK1/ATP5F1A/NUS1/ADIPOR1/EMC10/TGFBR2/ARF6/JCAD/AMOTL1/SPRED1/MAPRE2/ADAM9/MECP2/PTK2/MCC/PTEN/JUP/C…	76
GO:0031146	GO:0031146	SCF-dependent proteasomal ubiquitin-dependent protein catabolic process	37/4092	92/17320	0.000288884	0.00290184	0.00222737	FBXL3/WWTR1/PSMA4/CUL1/PSME4/FBXW11/PSMD5/PSMD8/PSMB5/PSMA6/PSMA7/PSMD10/PSMD7/FBXO31/DMAC2/PSMA2/FBXL20/PSMD3/PSMD11/FBXW7/FBXL4/SKP1/PSMD14/FBXL5/PSMF1/PSMB2/PSMA1/PSME3/PSMB7/PSMA5/FBXL2/CUL4B/PSMC2/FBXO33/FBXL14/PSMD12/STYX	37
GO:0061157	GO:0061157	mRNA destabilization	17/4092	32/17320	0.000290145	0.00290983	0.0022335	KHSRP/TARDBP/HNRNPR/METTL16/ZFP36/ROCK2/PUM1/RC3H1/CNOT6L/FTO/YTHDF1/ZFP36L2/ZFP36L1/YTHDF3/YTHDF2/GIGYF2/METTL3	17
GO:0090151	GO:0090151	establishment of protein localization to mitochondrial membrane	23/4092	49/17320	0.000296171	0.00294607	0.00226132	BID/HSP90AA1/BAX/PPP1R13B/TOMM22/YWHAE/TFDP2/YWHAH/YWHAQ/NMT1/TP53/PMAIP1/BCL2L11/OXA1L/CALM3/MAIP1/YWHAZ/YWHAB/YWHAG/HSPA4/TIMM22/TFDP1/PPP3R1	23
GO:1902883	GO:1902883	negative regulation of response to oxidative stress	23/4092	49/17320	0.000296171	0.00294607	0.00226132	REST/SIRT1/FBXO7/HIF1A/MET/HSPB1/SOD2/NFE2L2/PARK7/ATF4/TXN/AKT1/NONO/SLC7A11/PINK1/OXR1/BAG5/CTNNB1/PYCR1/ATG7/PSAP/RACK1/GPX1	23
GO:0033866	GO:0033866	nucleoside bisphosphate biosynthetic process	29/4092	67/17320	0.000296587	0.00294607	0.00226132	ELOVL5/ELOVL1/PDK3/ACSL4/PDPR/DLD/ACOT7/SCD/TECR/SLC25A1/ACSBG1/PANK3/ACSL3/PANK2/PPT1/ACLY/PDHA1/SCD5/CBR4/HSD17B12/SLC35B2/ELOVL7/PDP1/FASN/ELOVL6/PDP2/HACD2/HTD2/ACACA	29
GO:0034030	GO:0034030	ribonucleoside bisphosphate biosynthetic process	29/4092	67/17320	0.000296587	0.00294607	0.00226132	ELOVL5/ELOVL1/PDK3/ACSL4/PDPR/DLD/ACOT7/SCD/TECR/SLC25A1/ACSBG1/PANK3/ACSL3/PANK2/PPT1/ACLY/PDHA1/SCD5/CBR4/HSD17B12/SLC35B2/ELOVL7/PDP1/FASN/ELOVL6/PDP2/HACD2/HTD2/ACACA	29
GO:0034033	GO:0034033	purine nucleoside bisphosphate biosynthetic process	29/4092	67/17320	0.000296587	0.00294607	0.00226132	ELOVL5/ELOVL1/PDK3/ACSL4/PDPR/DLD/ACOT7/SCD/TECR/SLC25A1/ACSBG1/PANK3/ACSL3/PANK2/PPT1/ACLY/PDHA1/SCD5/CBR4/HSD17B12/SLC35B2/ELOVL7/PDP1/FASN/ELOVL6/PDP2/HACD2/HTD2/ACACA	29
GO:0034332	GO:0034332	adherens junction organization	29/4092	67/17320	0.000296587	0.00294607	0.00226132	VCL/CDH1/CTNNA1/CDC42/PVR/ACTB/PTPN23/ADD1/DSP/TJP1/NUMBL/NECTIN1/VEGFA/NUMB/RDX/ADAM10/DLG5/BMP6/CDH12/HIPK1/JAM3/CTNNB1/JUP/CADM2/NECTIN3/PAK2/PIP5K1C/SRC/CTNND1	29
GO:0000186	GO:0000186	activation of MAPKK activity	24/4092	52/17320	0.000302893	0.00300393	0.00230573	MAP3K9/EIF2AK2/MAP3K13/PSEN1/CRKL/MAPK1/RIPK2/TGFBR1/LAMTOR3/BMP4/RAF1/MAP3K7/MAP3K12/MAP3K21/EGFR/BRAF/FRS2/CRK/ADAM9/MAP3K2/MAP3K11/MAP3K15/F2R/MAP3K1	24
GO:0035794	GO:0035794	positive regulation of mitochondrial membrane permeability	27/4092	61/17320	0.000305601	0.00301642	0.00231532	GCLC/SLC25A5/BID/GSK3B/BAX/PPP1R13B/MUL1/BNIP3L/GSK3A/PPIF/YWHAE/TFDP2/ATF2/RHOT1/YWHAH/YWHAQ/NMT1/TP53/PMAIP1/BCL2L11/YWHAZ/YWHAB/YWHAG/BLOC1S2/TFDP1/SLC35F6/PPP3R1	27
GO:1902108	GO:1902108	regulation of mitochondrial membrane permeability involved in apoptotic process	27/4092	61/17320	0.000305601	0.00301642	0.00231532	GCLC/SLC25A5/BID/GSK3B/BAX/PPP1R13B/MUL1/BNIP3L/GSK3A/YWHAE/TFDP2/ATF2/RHOT1/YWHAH/YWHAQ/NMT1/TP53/PMAIP1/BCL2L11/YWHAZ/YWHAB/YWHAG/BLOC1S2/TFDP1/SLC35F6/PPP3R1/THEM4	27
GO:1904356	GO:1904356	regulation of telomere maintenance via telomere lengthening	27/4092	61/17320	0.000305601	0.00301642	0.00231532	PNKP/XRCC5/HNRNPC/MAPK1/TNKS2/CCT4/TCP1/TENT4B/HNRNPA2B1/GNL3L/DKC1/TERF2/HNRNPA1/PARP1/NAF1/CCT6A/HMBOX1/CCT5/NEK7/HNRNPU/CCT8/CCT3/CCT2/CTNNB1/DCP2/TNKS/SRC	27
GO:0097345	GO:0097345	mitochondrial outer membrane permeabilization	25/4092	55/17320	0.000306448	0.00302001	0.00231807	GCLC/SLC25A5/BID/GSK3B/BAX/PPP1R13B/MUL1/BNIP3L/GSK3A/YWHAE/TFDP2/RHOT1/YWHAH/YWHAQ/NMT1/TP53/PMAIP1/BCL2L11/YWHAZ/YWHAB/YWHAG/BLOC1S2/TFDP1/SLC35F6/PPP3R1	25
GO:0030042	GO:0030042	actin filament depolymerization	26/4092	58/17320	0.000307223	0.00302288	0.00232028	LIMA1/WDR1/CAPZB/ADD1/MTPN/PPP1R9B/SPTBN1/CAPZA1/DSTN/SWAP70/MICAL2/TMOD1/RDX/TMOD3/TWF1/EPS8/DMTN/F2RL1/CFL2/CFL1/CAPZA2/IQANK1/ADD2/CRACD/TMOD2/MICAL1	26
GO:0006665	GO:0006665	sphingolipid metabolic process	58/4092	162/17320	0.000308602	0.00303167	0.00232703	ELOVL5/ELOVL1/PLPP1/TNFRSF1A/ALDH3A2/HACD3/ACER3/BAX/SPTLC1/TECR/SPTLC2/VAPA/ASAH1/PPP2R1A/SERINC1/CERT1/PPP2CA/ESYT2/KDSR/VAPB/CLN6/SUMF2/PPT1/PRKAA1/SERINC3/B4GALNT1/TEX2/SMPD4/GLTP/CERS5/ESYT1/SIRT3/CERS2/UGCG/SAMD8/B4GALT5/B4GALT3/NEU3/SGMS2/ELOVL7/SERINC5/SGPL1/SERINC2/GLB1/ELOVL6/CERS6/UGT8/ACER2/PDXDC1/CLN8/ASAH2/GM2A/PSAP/SGMS1/ASAH2B/RACK1/HACD2/SGPP1	58
GO:0051054	GO:0051054	positive regulation of DNA metabolic process	69/4092	200/17320	0.000310428	0.00304482	0.00233712	PNKP/FAM168A/TP53BP1/TFRC/TIGAR/XRCC5/RIF1/HSP90AA1/BAX/HSP90AB1/SIRT1/MAPK1/NBN/TGFB1/TNKS2/NSD2/KMT5B/PTGES3/CCT4/UBE2B/TCP1/HNRNPA2B1/USP9X/TRIM28/DKC1/RFC3/SPIRE1/HNRNPA1/KLF4/MYC/ACTR2/PML/ARRB2/AKT1/PARP1/NAF1/EGFR/CCT6A/HMBOX1/RPS3/CCT5/NEK7/CEBPG/MMS19/CCT8/PAXIP1/EYA3/MRNIP/ABRAXAS1/CCT3/GNL3/RNF168/OTUD4/SPIDR/WRN/CCT2/CTNNB1/CHTF8/MECP2/PARM1/TNKS/UBE2N/HSF1/H2AX/ARID2/HMGB1/SRC/GTF2I/…	69
GO:0035303	GO:0035303	regulation of dephosphorylation	71/4092	207/17320	0.00031135	0.00304908	0.00234039	PTBP1/EIF2AK2/PPP1R12A/WNK1/MTMR1/PPP2R5A/PPP2R2C/PPP2R5C/GSK3B/MTMR2/FKBP1A/HSP90AB1/PCDH11X/SH2D4A/URI1/TGFB1/PPP2R1A/SHOC2/MTMR4/PPP1R9B/YWHAE/PPP6R3/CSRNP2/PHACTR2/PPP2R5D/GNAI2/SMG7/RCAN3/PPP1R8/SET/PTPA/ARPP19/SWAP70/ROCK2/PPP2R1B/RBM26/TIPRL/ENSA/CALM2/MFHAS1/DLG2/FARP1/PPP2R5E/PPARGC1B/BAG4/SPPL3/PPP1R15B/PINK1/CALM3/RRP1B/CNST/PPP4R2/LMTK2/NSMF/SPRED1/HSP90B1/MARF1/ELFN2/YWHAB/SMAD3/PPP1…	71
GO:0051402	GO:0051402	neuron apoptotic process	80/4092	239/17320	0.000326765	0.00319504	0.00245242	GCLC/CRLF1/BID/FAS/HSPA5/HIPK2/MAP2K4/RHOA/CDC42/PSEN1/BAX/KDM2B/AARS1/HSP90AB1/SIX4/HIF1A/ADNP/XIAP/AKT2/GSK3A/CASP2/UNC5B/TRIM2/FBXW7/GAPDH/ATN1/SOD2/LANCL1/ATF2/PARK7/FOXO3/SET/PIGT/MAX/ATF4/SNX6/PPT1/KRAS/SRPK2/STXBP1/ARRB1/MAP3K12/RB1/PDPK1/ARRB2/TP53/SOD1/APP/MCL1/PARP1/HSPD1/USP53/TNFRSF21/NONO/SIGMAR1/HYOU1/BCL2L11/NR4A2/PINK1/BTG2/NCSTN/GRIK2/OXR1/NSMF/AXL/CTNNB1/MECP2/BCL2L1/PRNP/MAP3K1…	80
GO:0006369	GO:0006369	termination of RNA polymerase II transcription	18/4092	35/17320	0.000328406	0.00320106	0.00245704	PAPOLA/SNRPD3/PABPN1/CSTF1/SETX/NCBP2/SNRPB/WDR33/ZNF473/CPSF7/SCAF4/SSU72/SLBP/NUDT21/CSTF3/CSTF2T/SCAF8/CPSF2	18
GO:0045292	GO:0045292	mRNA cis splicing, via spliceosome	18/4092	35/17320	0.000328406	0.00320106	0.00245704	WBP11/RBM22/DCPS/SRSF9/SRSF3/NCBP2/SRSF7/SRSF6/SRSF1/SNRNP200/SRSF2/PSIP1/RBM4B/RBM4/PRPF39/SRSF10/PRPF40A/SRSF8	18
GO:0006626	GO:0006626	protein targeting to mitochondrion	39/4092	99/17320	0.000332375	0.00323471	0.00248287	BID/TOMM34/USP36/CSNK2A2/SREBF1/LMAN1/HSP90AA1/HUWE1/SH3GLB1/TOMM22/FBXO7/BNIP3L/GSK3A/UBE2D3/GRPEL1/FBXW7/MFN2/RAC2/TIMM10B/PRKAA1/TIMM17A/SAE1/HSPD1/BAG3/TOMM70/BAG4/PINK1/GRPEL2/MFF/SLC25A6/HSPA4/TOMM20/ATG13/TOMM5/TIMM22/ARIH2/UBE2L3/SREBF2/TIMM23	39
GO:2001236	GO:2001236	regulation of extrinsic apoptotic signaling pathway	57/4092	159/17320	0.00033303	0.00323604	0.00248389	GCLC/CFLAR/TNFRSF12A/BID/FAS/CTNNA1/GSK3B/ITGA6/RFFL/STK4/STK3/TNFRSF10A/PPP2R1A/CAV1/TGFBR1/UNC5B/LTBR/ACVR1/BIRC6/PARK7/TNFRSF10B/BCL2L14/BMP4/RBCK1/PSME3/RAF1/ITM2C/TMBIM1/YAP1/PPP2R1B/PML/PMAIP1/AKT1/BCL10/MCL1/TCF7L2/SH3RF1/EYA3/DEDD2/LMNA/PEA15/ATF3/FEM1B/RNF34/BCL2L1/PTEN/PPP1CA/RELA/PAK2/SIAH2/NF1/SRC/DDX3X/GPX1/RB1CC1/IL7/ITGAV	57
GO:0018210	GO:0018210	peptidyl-threonine modification	46/4092	122/17320	0.000335899	0.00325884	0.0025014	WNK1/HIPK2/CSNK2A2/PRKACA/MARK2/UBE2K/GSK3B/MAPK1/CSNK2A1/RIPK2/TGFB1/GSK3A/PRKAG2/TGFBR1/HIPK3/PPP2R5D/EIF4G1/ACVR1/DYRK2/ROCK2/ACVR1B/CAB39/MAP3K12/PDPK1/GALNT1/RPTOR/APP/AKT1/GALNT2/CALM2/DCAF1/CAMK2D/PARD3/DYRK1A/DMTN/CALM3/HIPK1/TGFBR2/LMTK2/SPRED1/MAP2K1/OXSR1/TNKS/SPRED2/STK39/CALM1	46
GO:0007254	GO:0007254	JNK cascade	72/4092	211/17320	0.000337019	0.00326464	0.00250584	WNT16/MAP3K9/PAFAH1B1/SPAG9/TAB2/HIPK2/MAP2K4/CDC42/MAP4K4/MAP3K13/HACD3/SEMA3A/ITCH/MAGI3/MECOM/DNAJA1/MUL1/CRKL/RIPK2/STK3/FKTN/DKK1/DUSP3/HIPK3/LTBR/TPD52L1/RAP2A/TRAF3/GPS2/MEN1/TAOK3/MAP3K7/SDCBP/MAP3K12/IGF1R/MARVELD3/NCOR1/MINK1/APP/AKT1/MAP3K21/RPS27A/EGFR/MFHAS1/RPS3/TIRAP/PDCD4/UBC/SH3RF1/TIAM1/TAB3/PINK1/TAOK1/DVL3/FGF19/F2RL1/GRIK2/MAP3K2/UBB/ADORA2B/MAP3K11/TRIB1/UBE2N/IRAK1/AIDA/HMG…	72
GO:0010661	GO:0010661	positive regulation of muscle cell apoptotic process	15/4092	27/17320	0.000347765	0.003353	0.00257367	MAP2K4/TIGAR/STK4/SOD2/E2F3/HMGCR/MFN2/ATF4/PPARG/ARRB1/TP53/CAMK2D/PDCD4/CAPN2/PTEN	15
GO:0034243	GO:0034243	regulation of transcription elongation from RNA polymerase II promoter	15/4092	27/17320	0.000347765	0.003353	0.00257367	CDK13/SUPT16H/NELFCD/TCERG1/GTF2F1/EAPP/CDC73/BRD4/HNRNPU/ELOC/WDR43/RNF168/CDK12/LDB1/SUPT4H1	15
GO:0090140	GO:0090140	regulation of mitochondrial fission	15/4092	27/17320	0.000347765	0.003353	0.00257367	VPS35/DDHD2/MUL1/MIEF1/DDHD1/DHODH/SPIRE1/CYRIB/PINK1/TMEM135/MFF/MAPT/MARCHF5/MYO19/MCU	15
GO:0032204	GO:0032204	regulation of telomere maintenance	33/4092	80/17320	0.000348287	0.003353	0.00257367	PNKP/XRCC5/HNRNPC/MAPK1/NBN/TNKS2/CCT4/YLPM1/TCP1/TENT4B/HNRNPA2B1/GNL3L/DKC1/TERF2/HNRNPA1/MYC/PML/PARP1/NAF1/CCT6A/HMBOX1/CCT5/NEK7/HNRNPU/CCT8/SMG1/CCT3/GNL3/CCT2/CTNNB1/DCP2/TNKS/SRC	33
GO:0043401	GO:0043401	steroid hormone mediated signaling pathway	51/4092	139/17320	0.000355857	0.0034206	0.00262556	FKBP4/CALCOCO1/RNF14/PLPP1/RHOA/CBFB/PIAS2/SIRT1/DDX17/RBFOX2/EP300/UBR5/ZMIZ1/DDX5/NR3C1/UBE3A/PARK7/HDAC1/ARID1A/CNOT1/BMP4/MED1/NR1D1/RNF6/YWHAH/LATS1/WBP2/CLOCK/YAP1/ABHD2/NCOR1/ARRB2/CARM1/PARP1/CNOT9/PPARGC1B/RUNX1/HEYL/PGRMC2/CREBRF/PHB/KMT2D/ZBTB7A/CALR/RXRA/PPARA/STRN3/SRC/PHB2/NCOA4/TMF1	51
GO:1901214	GO:1901214	regulation of neuron death	101/4092	315/17320	0.000357206	0.0034283	0.00263147	GCLC/CRLF1/AP2B1/HIPK2/MAP2K4/RHOA/VPS35/CDC42/PICALM/TIGAR/PSEN1/GSK3B/REST/SSH1/BAX/PPP1R13B/KDM2B/AARS1/HSP90AB1/SIRT1/ABL1/FBXO7/SIX4/HIF1A/ADNP/CHMP4B/GSK3A/CASP2/UNC5B/DKK1/TRIM2/FBXW7/CBL/SOD2/EIF4G1/LANCL1/ATF2/DHCR24/PARK7/FOXO3/SET/EGR1/ELK1/ATF4/SNX6/PPT1/KRAS/RRAS2/EIF2S1/SRPK2/EGLN1/STXBP1/ARRB1/MAP3K12/PDPK1/ARRB2/TP53/SOD1/AKT1/MCL1/PARP1/HSPD1/NONO/SIGMAR1/BTBD10/HYOU1/SLC7A11/BCL…	101
GO:0034314	GO:0034314	Arp2/3 complex-mediated actin nucleation	19/4092	38/17320	0.000360295	0.00344736	0.0026461	NCKAP1/CTNNA2/WASL/WASF1/ACTR3/ARFIP2/ACTR2/ABI2/AP1AR/ARF1/JMY/WASF2/ARPC5/ARPC2/ARFIP1/GMFB/ARPC1A/BRK1/CYFIP1	19
GO:0045022	GO:0045022	early endosome to late endosome transport	19/4092	38/17320	0.000360295	0.00344736	0.0026461	RAB7A/PTPN23/RAB21/MTMR2/EZR/MAPK1/ANKRD27/SNX3/CHMP3/DENND10/BECN1/RDX/RAB5A/MSN/SNX12/LMTK2/MAP2K1/SRC/EMP2	19
GO:0009299	GO:0009299	mRNA transcription	4092-11-01	17/17320	0.000366771	0.00350395	0.00268953	SREBF1/DDX5/HIPK3/SRF/EREG/MED1/ATF4/TP53/STAT3/HSF1/FLNA	11
GO:0006497	GO:0006497	protein lipidation	37/4092	93/17320	0.000371799	0.00354461	0.00272074	ZDHHC6/ATG5/PIGS/ZDHHC8/PIGH/PPM1A/ZDHHC2/RAB3GAP1/RAB3GAP2/PIGT/GLUL/ZDHHC4/ABHD17C/NMT1/DPM2/WDR45B/PIGK/RABL3/PYURF/ATG12/GOLGA7/UGCG/PGAP2/PIGF/ATG10/ZDHHC7/ZDHHC5/WIPI2/ZDHHC3/PGAP4/ZDHHC20/ZDHHC9/ATG7/PIGY/SELENOK/ZDHHC21/ZDHHC17	37
GO:0090132	GO:0090132	epithelium migration	94/4092	290/17320	0.000372161	0.00354461	0.00272074	ITGA3/PIK3C2A/STRAP/MAP2K3/ATP2B4/PKN2/RHOA/PFN2/MAP4K4/CLASP1/SEMA3A/PTPN23/PXN/SIRT1/ABL1/MYH9/HIF1A/FERMT1/RAB11A/GPI/TGFB1/MET/HSPB1/TGFBR1/KANK1/PFN1/FBXW7/CORO1C/ATP5F1B/SRF/VEGFA/HBEGF/PDCD10/EPB41L5/RTN4/NFE2L2/LGALS8/NR4A1/RREB1/BMP4/SOX9/ID1/RRAS/PPARG/RAB25/ROCK2/ANXA1/GLUL/KLF4/PRCP/DNAJA4/MARVELD3/PDPK1/AKT1/EPHA2/RAB13/RHOB/WDPCP/IQSEC1/PTPRG/PLK2/ITGB1/DOCK1/ATP5F1A/NUS1/PAXIP1/ADI…	94
GO:1905269	GO:1905269	positive regulation of chromatin organization	41/4092	106/17320	0.000373309	0.00355013	0.00272498	KMT2E/JARID2/SREBF1/RIF1/SIRT1/VEGFA/KMT2A/LIF/TRIM28/DNMT1/WBP2/PPHLN1/KAT7/CDK9/ARRB1/RTF1/WDR61/GLYR1/TP53/SMAD4/BRD4/NSD3/PAXIP1/PINK1/CTBP1/CHTOP/LMNA/NIPBL/BRD7/CTNNB1/MECP2/SIN3A/ATF7IP/RESF1/UBE2N/MIER1/C6orf89/CTR9/RPS6KA5/MTF2/PAXBP1	41
GO:0009301	GO:0009301	snRNA transcription	31/4092	74/17320	0.000376569	0.00357569	0.0027446	CCNT2/CCNK/POLR2E/RPRD1B/POLR2C/TAF6/NCBP2/ELL2/RPAP2/GTF2F1/CCNT1/USPL1/CDK9/INTS14/GTF2A2/RPRD1A/POU2F1/POLR2D/MEPCE/POLR2K/TAF5/GTF2E1/RPRD2/ICE1/SNAPC3/GTF2A1/SNAPC5/POLR2L/POLR2A/SP1/TAF9	31
GO:0038093	GO:0038093	Fc receptor signaling pathway	78/4092	233/17320	0.000383595	0.00363475	0.00278993	PSMA4/CUL1/CYFIP2/TAB2/NCKAP1/MAP2K4/PSME4/CDC42/NFATC3/FBXW11/ACTB/HSP90AA1/PSMD5/HSP90AB1/ABL1/PSMD8/MAPK1/PSMB5/PSMA6/PSMA7/PSMD10/PSMD7/PIK3R2/WASL/PSMA2/LIMK1/PSMD3/PSMD11/NFKB1/SKP1/ACTR3/PSMD14/SOS1/RAP1A/WIPF3/PSMF1/PSMB2/PSMA1/PSME3/MAP3K7/RAC1/ABI1/PSMB7/ACTR2/PPP3CA/PDPK1/BCL10/PSMA5/PIK3R1/DOCK1/FER/TAB3/WASF2/SHC1/PSMC2/ARPC5/ARPC2/CRK/PTK2/WIPF2/RELA/YES1/GRB2/PAK2/ACTG1/SRC/PSMD12/…	78
GO:0030518	GO:0030518	intracellular steroid hormone receptor signaling pathway	44/4092	116/17320	0.000384535	0.00363475	0.00278993	FKBP4/CALCOCO1/RNF14/PLPP1/RHOA/CBFB/PIAS2/SIRT1/DDX17/RBFOX2/EP300/UBR5/ZMIZ1/DDX5/NR3C1/UBE3A/PARK7/HDAC1/ARID1A/CNOT1/MED1/RNF6/YWHAH/LATS1/WBP2/CLOCK/YAP1/NCOR1/ARRB2/CARM1/PARP1/CNOT9/PPARGC1B/RUNX1/HEYL/PHB/KMT2D/ZBTB7A/CALR/STRN3/SRC/PHB2/NCOA4/TMF1	44
GO:0042026	GO:0042026	protein refolding	13/4092	22/17320	0.000385116	0.00363475	0.00278993	HSPA5/DNAJA2/HSP90AA1/FKBP1A/ST13/HSPA8/HSPA9/DNAJA4/HSPD1/HSPA13/BAG5/B2M/HSPA14	13
GO:0140112	GO:0140112	extracellular vesicle biogenesis	13/4092	22/17320	0.000385116	0.00363475	0.00278993	TSG101/RAB7A/RAB11A/SDC1/VPS4B/SDC4/VPS4A/STAM/SDCBP/ARRDC4/ATP13A2/PDCD6IP/HGS	13
GO:0009123	GO:0009123	nucleoside monophosphate metabolic process	30/4092	71/17320	0.000389615	0.00367167	0.00281827	AK2/PNKP/DLG1/NT5C2/MAGI3/AK6/GMPR2/PRPS2/DHODH/IMPDH1/PAICS/PPAT/DCTD/RFK/NT5E/UCK2/CASK/PRPS1/AK3/DLG2/GART/CMPK1/AK4/GMPS/TK1/IMPDH2/PFAS/ADA/ADK/DCK	30
GO:0045540	GO:0045540	regulation of cholesterol biosynthetic process	21/4092	44/17320	0.000404979	0.00380497	0.00292059	NFYA/CYP51A1/MBTPS2/NFYC/SREBF1/SCD/ERLIN1/KPNB1/SC5D/LPCAT3/HMGCR/RAN/PRKAA1/SOD1/ERLIN2/FASN/ELOVL6/DHCR7/SP1/SREBF2/ACACA	21
GO:0106118	GO:0106118	regulation of sterol biosynthetic process	21/4092	44/17320	0.000404979	0.00380497	0.00292059	NFYA/CYP51A1/MBTPS2/NFYC/SREBF1/SCD/ERLIN1/KPNB1/SC5D/LPCAT3/HMGCR/RAN/PRKAA1/SOD1/ERLIN2/FASN/ELOVL6/DHCR7/SP1/SREBF2/ACACA	21
GO:0009314	GO:0009314	response to radiation	136/4092	445/17320	0.000411645	0.00383783	0.00294581	CREBBP/FBXL3/PIAS1/PNKP/CTNS/HSPA5/OPN3/KARS1/FECH/TP53BP1/NUCKS1/SMC1A/UBE2A/TIGAR/GNB1/XRCC5/ZMPSTE24/DDHD2/BAX/GNA11/SIRT1/EP300/HIF1A/YY1/AKT2/NAMPT/CCND1/TMEM109/CBL/METAP2/MAPK14/HMGCR/TANC1/ID2/RPE65/RO60/B4GALT2/UBE2B/TRIM32/EGR1/ZRANB3/CDKN1A/DYNLRB1/ELK1/ATF4/EIF2AK4/JUND/PRKAA1/PDE6A/KRAS/MEN1/EIF2S1/CLOCK/ANXA1/MDM2/HUS1/NMT1/TANK/TXN/MYC/ARRB1/YAP1/PML/TP53/APP/AKT1/SDE2/PARP1/RHOB/S…	136
GO:0001844	GO:0001844	protein insertion into mitochondrial membrane involved in apoptotic signaling pathway	16/4092	30/17320	0.000412161	0.00383783	0.00294581	BID/BAX/PPP1R13B/YWHAE/TFDP2/YWHAH/YWHAQ/NMT1/TP53/PMAIP1/BCL2L11/YWHAZ/YWHAB/YWHAG/TFDP1/PPP3R1	16
GO:0018279	GO:0018279	protein N-linked glycosylation via asparagine	16/4092	30/17320	0.000412161	0.00383783	0.00294581	FUT8/ST6GAL1/LMAN1/MAGT1/RPN2/DAD1/STT3A/DPM2/STT3B/RPN1/MCFD2/UBE2J1/OSTC/OST4/DDOST/MGAT2	16
GO:0036475	GO:0036475	neuron death in response to oxidative stress	16/4092	30/17320	0.000412161	0.00383783	0.00294581	REST/FBXO7/HIF1A/FBXW7/LANCL1/PARK7/ATF4/MCL1/PARP1/NONO/SLC7A11/PINK1/OXR1/CTNNB1/ATG7/RACK1	16
GO:1902186	GO:1902186	regulation of viral release from host cell	16/4092	30/17320	0.000412161	0.00383783	0.00294581	TSG101/CHMP2B/CHMP4B/VAPA/CAV2/CHMP3/TRIM32/VPS4B/TRIM25/TRIM28/TRIM5/VPS4A/VPS37B/PML/TRIM8/TRIM13	16
GO:1904837	GO:1904837	beta-catenin-TCF complex assembly	16/4092	30/17320	0.000412161	0.00383783	0.00294581	CREBBP/EP300/BCL9/HDAC1/RBBP5/MEN1/CDC73/MYC/TLE3/TCF7L2/PYGO2/KMT2D/CTNNB1/RUVBL1/BCL9L/TRRAP	16
GO:0032259	GO:0032259	methylation	113/4092	360/17320	0.000413501	0.00384457	0.00295099	CREBBP/KMT2E/JARID2/MAT2B/KMT2C/BAZ2A/RIF1/ZMPSTE24/MECOM/DIMT1/METTL2A/COMT/SIRT1/SETD1A/MTAP/SNRPD3/TTLL12/PRMT5/AHCY/RNMT/CTCF/SETD6/GSPT1/RAB3D/GSK3A/CBLL1/NSD2/KMT5B/PRDM4/ICMT/ASH1L/PRDM2/RLF/RBBP5/NSUN4/KMT2A/FAM98A/HELLS/PCMT1/ETF1/MRM2/ZC3H13/METTL8/MTRR/SNRPB/PRMT1/EMG1/METTL16/NSUN5/TRIM28/DNMT1/MEN1/MBD2/THUMPD3/SMYD5/PWP1/NIBAN2/MYC/RTF1/SETD1B/WDR61/SMAD4/BRD4/CARM1/PARP1/SETD7/WTAP…	113
GO:0044088	GO:0044088	regulation of vacuole organization	22/4092	47/17320	0.000418488	0.00387939	0.00297771	IFT88/ENO1/SH3GLB1/CHMP4B/LAPTM4B/RAB3GAP1/RAB3GAP2/TBC1D14/SCARB2/RAB5A/FEZ1/PIP4K2A/PINK1/PIP4K2C/FEZ2/RAB1B/TMEM39A/SMCR8/ANXA2/UBQLN2/ENO4/PIP4K2B	22
GO:1902743	GO:1902743	regulation of lamellipodium organization	22/4092	47/17320	0.000418488	0.00387939	0.00297771	CD44/NCKAP1/CDC42/FSCN1/CAPZB/ARHGEF7/KANK1/CORO1C/ACTR3/RREB1/RAC2/RAC1/ACTR2/EPHA2/TWF1/FER/WASF2/DMTN/ARPC2/AKIRIN1/SRC/BRK1	22
GO:0043297	GO:0043297	apical junction assembly	34/4092	84/17320	0.000434549	0.0040163	0.0030828	PRKCH/VCL/CTNNA1/PKN2/RHOA/CBFB/WDR1/PRKACA/MPP5/DLG1/TJP1/SRF/STRN/PARD6B/ACTN4/ROCK2/APC/MARVELD3/EPHA2/RAB13/MTDH/PARD3/MPP7/DLG5/MARVELD2/RHOC/F11R/RUNX1/PDCD6IP/PARD6G/PAK2/CLDN7/CLDN4/MYO1C	34
GO:0097581	GO:0097581	lamellipodium organization	34/4092	84/17320	0.000434549	0.0040163	0.0030828	CD44/VCL/NCKAP1/CDC42/FSCN1/CAPZB/ABLIM1/ARHGEF7/KANK1/CORO1C/WASF1/GOLPH3/ACTR3/RREB1/RAC2/AJUBA/ARFIP2/RAC1/ABI1/ACTR2/EPHA2/ITGB1/TWF1/FER/WASF2/DMTN/ARPC5/ARPC2/AKIRIN1/SPATA13/SRC/SNX2/BRK1/CYFIP1	34
GO:0001667	GO:0001667	ameboidal-type cell migration	124/4092	401/17320	0.000435827	0.0040163	0.0030828	ITGA3/PAFAH1B1/PIK3C2A/STRAP/MAP2K3/KITLG/ATP2B4/PKN2/RHOA/PFN2/MAP4K4/CLASP1/SEMA3A/PTPN23/PXN/EFNB1/RFFL/SEMA4G/SIRT1/ABL1/MYH9/HIF1A/FERMT1/ARHGEF7/RAB11A/GPI/TGFB1/MET/HSPB1/TGFBR1/KANK1/ZFAND5/PFN1/C1QBP/SMURF2/FBXW7/CORO1C/ATP5F1B/SRF/VEGFA/HBEGF/AMOTL2/PDCD10/EPB41L5/ACVR1/RTN4/NFE2L2/LGALS8/NR4A1/AGO2/SDC4/RREB1/BMP4/SOX9/ID1/RRAS/AKAP12/CAP1/PPARG/RAB25/ROCK2/ANXA1/ACVR1B/GLUL/KLF4/PRCP/…	124
GO:0002831	GO:0002831	regulation of response to biotic stimulus	124/4092	401/17320	0.000435827	0.0040163	0.0030828	TSPAN6/CREBBP/MATR3/IFNGR1/PIAS1/PSMA4/CUL1/TAB2/PUM2/PSME4/PRKACA/FBXW11/PVR/UBE2K/TIGAR/ITCH/XRCC5/ARG2/ZMPSTE24/MAVS/MUL1/PSMD5/HSP90AB1/PSMD8/TTLL12/EP300/COCH/PSMB5/PSMA6/PSMA7/RNF125/PSMD10/XIAP/PSMD7/RIPK2/RPS19/CDC37/PSMA2/PSMD3/C1QBP/PSMD11/NFKB1/BIRC2/POLR3G/SKP1/PSMD14/STAT1/SUMO1/EREG/MED1/PSMF1/PSMB2/APOBEC3F/EIF2AK4/PSMA1/SEC14L1/TRAF3/PSME3/RAF1/PPARG/TRIM5/ANKRD17/POLR3F/KRAS/PUM1…	124
GO:1903844	GO:1903844	regulation of cellular response to transforming growth factor beta stimulus	45/4092	120/17320	0.000445228	0.00409689	0.00314466	CFLAR/CREBBP/ITGA3/STRAP/HSPA5/HIPK2/GLG1/HSP90AB1/SIRT1/EP300/PPM1A/FERMT1/STUB1/TGFB1/CAV2/CAV1/TGFBR1/MTMR4/SMURF2/ZNF451/GOT1/SNX6/MEN1/SDCBP/PDPK1/TP53/SMAD4/RPS27A/UBC/RNF111/SKI/TGFBR2/CITED2/SPRED1/SMAD3/UBB/CHST11/LEMD3/SMAD2/ZBTB7A/BCL9L/TRIM33/SPRED2/SMURF1/UBA52	45
GO:0007030	GO:0007030	Golgi organization	53/4092	147/17320	0.000451161	0.00414538	0.00318187	VMP1/CDC42/CLASP1/LMAN1/TMED2/HUWE1/MAPK1/PRMT5/TRIP11/ARHGEF7/RAB2A/SEC23IP/GBF1/ARHGAP21/GOLPH3/CSNK1A1/PDCD10/GORASP2/BLZF1/TMED5/CAMSAP2/ATL2/ARL1/TBC1D20/RBSN/TMED7/STX6/STX17/RAB1A/USO1/CSNK1D/GOLPH3L/SURF4/SEC16A/USP6NL/VTI1A/PI4K2A/TMED4/YWHAZ/BAG5/MAP2K1/TMED10/GOLGB1/UBXN2A/FBXW8/VCPIP1/LYSMD3/NPLOC4/ATL3/TMED9/UBXN2B/TICAM2/TJAP1	53
GO:0043242	GO:0043242	negative regulation of protein-containing complex disassembly	33/4092	81/17320	0.000455925	0.00417686	0.00320604	LIMA1/CLASP1/CAPZB/ADD1/MID1/MTPN/SPTBN1/CAPZA1/CAMSAP2/CAMSAP1/SWAP70/APC/CKAP2/TMOD1/RDX/TMOD3/RUBCN/TWF1/EPS8/SCAF4/DMTN/TAOK1/UBQLN4/ATXN7/MID1IP1/BMERB1/TMEM39A/CAPZA2/IQANK1/SCAF8/ADD2/CRACD/TMOD2	33
GO:1901992	GO:1901992	positive regulation of mitotic cell cycle phase transition	33/4092	81/17320	0.000455925	0.00417686	0.00320604	CDC27/KMT2E/CUL3/CDC23/APEX1/CDC25B/RAB11A/CCND1/KLHL18/EIF4G1/VPS4B/ANKRD17/ANXA1/CDK4/MDM2/RDX/TMOD3/RB1/RPTOR/BRD4/APP/AKT1/EGFR/MEPCE/CUL4B/MECP2/SIN3A/RCC2/PBX1/TFDP1/PHB2/DDX3X/RAD51B	33
GO:1902115	GO:1902115	regulation of organelle assembly	66/4092	192/17320	0.000463512	0.00424015	0.00325462	MARK4/IFT88/MAP4/ATG5/RNF4/RHOA/TSG101/FSCN1/VDAC3/CHMP2B/CHMP5/EZR/SH3GLB1/CHMP4B/PTPRS/CNOT6/RAB3GAP1/SDC1/ALMS1/RAB3GAP2/VPS4B/SEPTIN7/SDC4/CNOT1/CHMP1A/PRKAA1/TBC1D14/STAM/SDCBP/RDX/G3BP2/CNOT6L/TCHP/SMAD4/RAB5A/ATG3/PLK2/G3BP1/MSN/FEZ1/PIP4K2A/PAN3/HNRNPU/ASAP1/CCSAP/PINK1/ARHGAP35/ATMIN/PIP4K2C/ATXN2L/PDCD6IP/FEZ2/RAB1B/TMEM39A/SMCR8/RCC1/NPM1/SEPTIN9/DRG1/UBQLN2/SRC/NBDY/ATXN2/NUP62/CHMP1B…	66
GO:0035304	GO:0035304	regulation of protein dephosphorylation	50/4092	137/17320	0.000466293	0.00425052	0.00326258	PTBP1/EIF2AK2/PPP1R12A/PPP2R5A/PPP2R2C/PPP2R5C/GSK3B/FKBP1A/HSP90AB1/URI1/TGFB1/PPP2R1A/SHOC2/PPP1R9B/YWHAE/PPP6R3/PHACTR2/PPP2R5D/GNAI2/RCAN3/PPP1R8/SET/PTPA/ARPP19/SWAP70/ROCK2/PPP2R1B/TIPRL/ENSA/CALM2/MFHAS1/PPP2R5E/SPPL3/PPP1R15B/PINK1/CALM3/PPP4R2/LMTK2/NSMF/HSP90B1/ELFN2/YWHAB/PPP1R3B/ANKLE2/SLC39A10/CALM1/PHACTR4/ITGA1/PPME1/PPP2R2A	50
GO:0001890	GO:0001890	placenta development	55/4092	154/17320	0.000466311	0.00425052	0.00326258	DAZAP1/TMED2/HSP90AB1/MAPK1/CCDC134/HIF1A/STK4/STK3/DNAJB6/BIRC2/MAPK14/STC2/BIRC6/EPAS1/ASH1L/ARID1A/LHX4/MED1/LIF/TRIM28/PPARG/MEN1/NOTCH2/ADAM19/EGLN1/HS6ST1/SOD1/AKT1/ARNT/EGFR/PLCD3/SENP2/CTSB/PRDX3/E2F7/RBPJ/MAP2K1/PTK2/KRT8/KRT19/BPTF/BSG/SP3/FBXW8/FOSL1/GRB2/SETD2/PHLDA2/HSF1/NR2F2/ZFP36L1/RXRA/GJB3/ADA/BMPR2	55
GO:0043928	GO:0043928	exonucleolytic catabolism of deadenylated mRNA	17/4092	33/17320	0.000467367	0.00425052	0.00326258	DIS3/DCPS/DDX6/CNOT6/LSM4/EXOSC2/WDR61/NT5C3B/CNOT8/PATL1/LSM3/DCP2/EDC3/CNOT7/DCP1A/EXOSC3/LSM1	17
GO:0050685	GO:0050685	positive regulation of mRNA processing	17/4092	33/17320	0.000467367	0.00425052	0.00326258	THRAP3/DAZAP1/RBM3/HSPA8/PRPF19/NUP98/NCBP2/NCL/PRDX6/CDC73/TRA2B/SF3B4/RBMX/TRA2A/NUDT21/HSF1/RBMXL1	17
GO:0000463	GO:0000463	maturation of LSU-rRNA from tricistronic rRNA transcript (SSU-rRNA, 5.8S rRNA, LSU-rRNA)	4092-10-01	15/17320	0.000485935	0.00441297	0.00338727	DDX18/GTPBP4/ZNHIT6/RPL35/WDR12/RPL7L1/NIFK/NOL9/RPF2/ZNHIT3	10
GO:0000423	GO:0000423	mitophagy	14/4092	25/17320	0.000491503	0.00445706	0.00342111	TIGAR/HUWE1/CDC37/MFN2/BECN1/ATG14/MAP1LC3B/TP53/PINK1/SQSTM1/ATG13/RNF41/SMURF1/PHB2	14
GO:0042147	GO:0042147	retrograde transport, endosome to Golgi	36/4092	91/17320	0.000503258	0.00455254	0.0034944	SPAG9/VAMP3/VPS35/RAB7A/ERC1/SNX5/VTI1B/CLN5/YKT6/RIC1/RGP1/GBF1/GOSR2/GOSR1/SNX3/ARL1/VPS26A/SNX6/TBC1D5/RBSN/TBC1D14/STX6/PREPL/CLTC/SNX12/VTI1A/TRAPPC10/ARFIP1/SNX32/RAB6A/BET1L/ANKFY1/SNX2/RAB6C/RAB6D/TBC1D23	36
GO:0035567	GO:0035567	non-canonical Wnt signaling pathway	54/4092	151/17320	0.00050349	0.00455254	0.0034944	AP2B1/PSMA4/RHOA/PSME4/CDC42/GNB1/TNRC6A/AGO1/PSMD5/ABL1/PSMD8/TNRC6B/PSMB5/PSMA6/PSMA7/PSMD10/PSMD7/FZD3/PSMA2/DKK1/PSMD3/PFN1/PSMD11/SMURF2/PTK7/PSMD14/AGO2/PSMF1/PSMB2/AGO3/PSMA1/PSME3/PDE6A/MAP3K7/RAC1/PSMB7/PPP3CA/CLTC/ARRB2/CSNK1D/PSMA5/TCF7L2/TIAM1/PSMC2/DVL3/AP2M1/FZD6/CTNNB1/VANGL1/PSMD12/CALM1/SMURF1/CSNK1E/PPP3R1	54
GO:0007093	GO:0007093	mitotic cell cycle checkpoint	58/4092	165/17320	0.000527814	0.00476558	0.00365793	ZNF207/FOXN3/CHFR/DLG1/CNOT4/BAX/PCBP4/EP300/FBXO31/NBN/TGFB1/CASP2/CCND1/CNOT6/TFDP2/ATF2/ARID3A/PLAGL1/CDKN1A/SOX4/CNOT1/PRMT1/PSMG2/VPS4A/APC/TAOK3/MDM2/HUS1/CNOT6L/RB1/PML/TP53/CARM1/CNOT9/PLK2/HMGA2/RAD17/BUB3/EME1/CNOT8/CNOT11/DONSON/BTG2/TAOK1/MRNIP/ZNF385A/RPL26/E2F7/TRIAP1/BCL2L1/RAD9A/RPS27L/TFDP1/MDM4/CNOT7/GIGYF2/E2F4/MAD2L1	58
GO:0045088	GO:0045088	regulation of innate immune response	96/4092	300/17320	0.000530503	0.00478295	0.00367126	CREBBP/MATR3/IFNGR1/PIAS1/PSMA4/CUL1/TAB2/PSME4/PRKACA/FBXW11/PVR/UBE2K/XRCC5/MAVS/MUL1/PSMD5/HSP90AB1/PSMD8/TTLL12/EP300/COCH/PSMB5/PSMA6/PSMA7/PSMD10/XIAP/PSMD7/RPS19/CDC37/PSMA2/PSMD3/PSMD11/NFKB1/BIRC2/POLR3G/SKP1/PSMD14/STAT1/SUMO1/EREG/MED1/PSMF1/PSMB2/PSMA1/PSME3/RAF1/PPARG/TRIM5/POLR3F/KRAS/MAP3K7/PSMB7/PDPK1/ARRB2/BCL10/PRKACB/PSMA5/NONO/TIRAP/LRP8/TAB3/IFNGR2/ADAR/PSMC2/JAK1/ABCE1/AP1G1…	96
GO:0071243	GO:0071243	cellular response to arsenic-containing substance	4092-12-01	20/17320	0.000535574	0.00480785	0.00369037	GSTO2/MKNK2/ZFAND1/PPIF/ATF4/SLC38A2/HNRNPA1/MAPK13/ATF3/VCP/HSF1/DDX3X	12
GO:0097734	GO:0097734	extracellular exosome biogenesis	4092-12-01	20/17320	0.000535574	0.00480785	0.00369037	TSG101/RAB7A/RAB11A/SDC1/VPS4B/SDC4/VPS4A/STAM/SDCBP/ATP13A2/PDCD6IP/HGS	12
GO:1902236	GO:1902236	negative regulation of endoplasmic reticulum stress-induced intrinsic apoptotic signaling pathway	4092-12-01	20/17320	0.000535574	0.00480785	0.00369037	HERPUD1/XBP1/PARK7/TXNDC12/SELENOS/TMBIM6/HYOU1/SYVN1/BCL2L1/GRINA/PTPN1/MAGEA3	12
GO:2000573	GO:2000573	positive regulation of DNA biosynthetic process	29/4092	69/17320	0.000537958	0.00482233	0.00370148	PNKP/XRCC5/HSP90AA1/HSP90AB1/MAPK1/TNKS2/PTGES3/CCT4/TCP1/HNRNPA2B1/DKC1/RFC3/HNRNPA1/KLF4/MYC/ARRB2/NAF1/CCT6A/HMBOX1/CCT5/NEK7/CCT8/CCT3/CCT2/CTNNB1/CHTF8/PARM1/TNKS/SRC	29
GO:0090090	GO:0090090	negative regulation of canonical Wnt signaling pathway	62/4092	179/17320	0.000540795	0.00484081	0.00371567	WWTR1/CUL3/PSMA4/PSME4/LRP6/GSK3B/PSMD5/PSMD8/PSMB5/PSMA6/STK4/PSMA7/FERMT1/PSMD10/PSMD7/STK3/TLE5/GSK3A/CAV1/PSMA2/LZTS2/DKK1/PSMD3/PSMD11/SLC9A3R1/WNT5B/MAPK14/CSNK1A1/PSMD14/HDAC1/KLHL12/FOXO3/EGR1/SOX9/PSMF1/PSMB2/PSMA1/LATS1/PSME3/UBAC2/APC/SCYL2/PSMB7/TLE3/PSMA5/LIMD1/G3BP1/TCF7L2/LATS2/FOXO1/DKK2/AMFR/PSMC2/DVL3/FZD6/MCC/TMEM64/SIAH2/KREMEN1/PSMD12/CTNND1/EMD	62
GO:0031056	GO:0031056	regulation of histone modification	53/4092	148/17320	0.000543583	0.0048588	0.00372948	KMT2E/JARID2/ATG5/SREBF1/RIF1/ZMPSTE24/SIRT1/CTCF/UBR5/ZNF451/VEGFA/PARK7/KMT2A/UBE2B/SET/LIF/DNMT1/WBP2/KAT7/CDK9/ARRB1/RTF1/WDR61/GLYR1/TP53/SMAD4/BRD4/CAMK2D/SETD7/NSD3/PAXIP1/SKI/PINK1/CTBP1/CHTOP/LMNA/PYGO2/NIPBL/NSD1/BRD7/CTNNB1/SETD5/MECP2/SIN3A/UBE2N/NOC2L/C6orf89/CTR9/PARG/EID1/RPS6KA5/MTF2/PAXBP1	53
GO:0055072	GO:0055072	iron ion homeostasis	34/4092	85/17320	0.000561765	0.00501416	0.00384873	HFE/CUL1/CYBRD1/TFRC/PICALM/EIF2AK1/FTL/HIF1A/SLC39A14/CAND1/SKP1/ATP6V1A/STEAP3/EPAS1/FBXL5/ACO1/NEDD8/NDFIP1/EGLN1/ISCU/IREB2/MYC/SMAD4/SOD1/SLC25A37/BMP6/STEAP2/ATP13A2/FLVCR1/B2M/FTH1/TMEM199/NCOA4/SRI	34
GO:1905710	GO:1905710	positive regulation of membrane permeability	27/4092	63/17320	0.000572087	0.00509498	0.00391077	GCLC/SLC25A5/BID/GSK3B/BAX/PPP1R13B/MUL1/BNIP3L/GSK3A/PPIF/YWHAE/TFDP2/ATF2/RHOT1/YWHAH/YWHAQ/NMT1/TP53/PMAIP1/BCL2L11/YWHAZ/YWHAB/YWHAG/BLOC1S2/TFDP1/SLC35F6/PPP3R1	27
GO:0000075	GO:0000075	cell cycle checkpoint	73/4092	218/17320	0.000573132	0.00509498	0.00391077	ZNF207/FOXN3/TP53BP1/CHFR/DLG1/CNOT4/BAX/PCBP4/WAC/THOC5/EP300/FBXO31/NBN/TGFB1/CASP2/CCND1/PRPF19/MAPK14/CNOT6/TFDP2/ATF2/ARID3A/PLAGL1/CDKN1A/SOX4/CNOT1/PRMT1/PSMG2/EIF2AK4/VPS4A/CLOCK/APC/TAOK3/MDM2/HUS1/CNOT6L/RB1/PML/TP53/CARM1/TIPRL/CNOT9/PLK2/HMGA2/RAD17/BUB3/EME1/CNOT8/CNOT11/CCAR2/DONSON/BTG2/TAOK1/MRNIP/ZNF385A/RPL26/PEA15/ABRAXAS1/E2F7/FEM1B/TRIAP1/BCL2L1/RAD9A/PTPN11/RPS27L/H2AX/TFDP1…	73
GO:0022604	GO:0022604	regulation of cell morphogenesis	149/4092	497/17320	0.000573955	0.00509498	0.00391077	MYCBP2/TNFRSF12A/PAFAH1B1/ZRANB1/CD44/RHOA/SYT1/CDC42/WDR1/MARK2/MAP3K13/SEMA3A/DLG1/CAPZB/RAB21/PSEN1/GSK3B/ZMPSTE24/MUL1/EZR/SEMA4G/ABL1/CRKL/MYH9/COCH/ADNP/ARHGEF7/FBXO31/RAB11A/ANKRD27/PTPRS/LIMK1/KANK1/DNMBP/C1QBP/SLC9A3R1/SH3D19/CORO1C/SRF/VEGFA/UBE3A/TTL/RTN4/RND3/MYL12B/RHOQ/GNA13/SEPTIN7/VAMP7/RREB1/RAP2A/ID1/RNF6/YWHAH/CDC42EP1/RAC2/MKLN1/ACTN4/CAMSAP1/DIAPH1/MYH10/WDR36/ANXA1/CAPRIN1/R…	149
GO:1904591	GO:1904591	positive regulation of protein import	20/4092	42/17320	0.000574083	0.00509498	0.00391077	CDH1/IPO5/PSEN1/RBM22/MAVS/HSP90AB1/MAPK1/NUTF2/UBR5/TGFB1/PIK3R2/MAPK14/TARDBP/TRIM28/RAN/PIK3R1/BAG3/SMAD3/JUP/FLNA	20
GO:0006643	GO:0006643	membrane lipid metabolic process	71/4092	211/17320	0.000579709	0.00513729	0.00394324	ELOVL5/ST3GAL6/ELOVL1/PLPP1/TNFRSF1A/ALDH3A2/HACD3/ACER3/BAX/PIGS/SPTLC1/TECR/PIGH/SPTLC2/VAPA/ASAH1/PPP2R1A/SERINC1/CERT1/PPP2CA/ESYT2/KDSR/PIGT/VAPB/CLN6/SUMF2/PPT1/PRKAA1/SERINC3/B4GALNT1/TEX2/SMPD4/DPM2/GLTP/CERS5/ESYT1/SIRT3/PIGK/CERS2/PYURF/UGCG/PGAP2/PIGF/SAMD8/B4GALT5/B4GALT3/NEU3/SGMS2/ELOVL7/SERINC5/PGAP4/SGPL1/SERINC2/GLB1/ELOVL6/CERS6/UGT8/B3GNT5/ACER2/PDXDC1/CLN8/ASAH2/GM2A/PSAP/SGMS…	71
GO:0018105	GO:0018105	peptidyl-serine phosphorylation	98/4092	308/17320	0.000580494	0.00513729	0.00394324	CD44/PRKCH/ATP2B4/WNK1/HIPK2/PKN2/PDK3/PFN2/CSNK2A2/PRKACA/TFRC/MARK2/MAP3K13/ARAF/HSP90AA1/GSK3B/BAX/HSP90AB1/PRKY/MKNK2/MAPK1/STK4/CSNK2A1/RIPK2/AKT2/TGFB1/GSK3A/CAV1/TGFBR1/DKK1/RPS6KB1/HIPK3/CREBL2/MAPK14/STK38/VEGFA/CSNK1A1/PDCD10/EIF4G1/PARK7/NEK6/MAPKAP1/DYRK2/LIF/LATS1/RAF1/PRKAA1/ROCK2/SRPK2/CAB39/PWP1/TXN/ARRB1/MAP3K12/PDPK1/ARRB2/CSNK1D/RPTOR/APP/AKT1/CNOT9/CAMK2D/PLK2/EGFR/TLK2/HMGA2/…	98
GO:0001738	GO:0001738	morphogenesis of a polarized epithelium	52/4092	145/17320	0.000586809	0.00518583	0.0039805	AP2B1/PAFAH1B1/PSMA4/RHOA/PSME4/EXOC5/CDC42/WDR1/ACTB/RAB10/PSMD5/ABL1/PSMD8/PSMB5/PSMA6/PSMA7/PSMD10/PSMD7/FZD3/PSMA2/DKK1/PSMD3/PFN1/PSMD11/SMURF2/SLC9A3R1/PTK7/PSMD14/PSMF1/PSMB2/PSMA1/PSME3/RAC1/PSMB7/SEC24B/CLTC/ARRB2/PSMA5/MSN/ASTN2/DLG5/ZDHHC7/TIAM1/PSMC2/DVL3/AP2M1/FZD6/VANGL1/ACTG1/PSMD12/SMURF1/MYO9A	52
GO:0017015	GO:0017015	regulation of transforming growth factor beta receptor signaling pathway	44/4092	118/17320	0.000589093	0.00519866	0.00399035	CREBBP/ITGA3/STRAP/HSPA5/HIPK2/GLG1/HSP90AB1/SIRT1/EP300/PPM1A/FERMT1/STUB1/TGFB1/CAV2/CAV1/TGFBR1/MTMR4/SMURF2/ZNF451/GOT1/SNX6/MEN1/SDCBP/PDPK1/TP53/SMAD4/RPS27A/UBC/RNF111/SKI/TGFBR2/CITED2/SPRED1/SMAD3/UBB/CHST11/LEMD3/SMAD2/ZBTB7A/BCL9L/TRIM33/SPRED2/SMURF1/UBA52	44
GO:0042771	GO:0042771	intrinsic apoptotic signaling pathway in response to DNA damage by p53 class mediator	21/4092	45/17320	0.000591649	0.00519919	0.00399075	CD44/HIPK2/SIRT1/EP300/TMEM109/CDKN1A/DYRK2/MARCHF7/PML/TP53/ZNF385A/RPL26/HIPK1/SHISA5/HNRNPK/TRIAP1/PHLDA3/AEN/RPS27L/TAF9B/TAF9	21
GO:0051204	GO:0051204	protein insertion into mitochondrial membrane	21/4092	45/17320	0.000591649	0.00519919	0.00399075	BID/HSP90AA1/BAX/PPP1R13B/TOMM22/YWHAE/TFDP2/YWHAH/YWHAQ/NMT1/TP53/PMAIP1/BCL2L11/MAIP1/YWHAZ/YWHAB/YWHAG/HSPA4/TIMM22/TFDP1/PPP3R1	21
GO:1901028	GO:1901028	regulation of mitochondrial outer membrane permeabilization involved in apoptotic signaling pathway	21/4092	45/17320	0.000591649	0.00519919	0.00399075	GCLC/SLC25A5/BID/GSK3B/BAX/PPP1R13B/MUL1/GSK3A/YWHAE/TFDP2/YWHAH/YWHAQ/NMT1/TP53/PMAIP1/YWHAZ/YWHAB/YWHAG/TFDP1/SLC35F6/PPP3R1	21
GO:0008089	GO:0008089	anterograde axonal transport	22/4092	48/17320	0.000601682	0.00527252	0.00404704	KIF1B/AP3D1/AP3M2/RAB21/KIF3B/BLOC1S6/HSPB1/KIF1C/TERF2/ARL8B/SOD1/SNAPIN/FEZ1/DLG2/AP3S2/KIF5C/KIF5B/AP3S1/TRAK1/AP3M1/BLOC1S2/BLOC1S5	22
GO:0045646	GO:0045646	regulation of erythrocyte differentiation	22/4092	48/17320	0.000601682	0.00527252	0.00404704	SENP1/RBFOX2/HIF1A/CDK6/MAPK14/HSPA9/STAT1/ID2/FOXO3/FAM210B/MED1/PRMT1/ZFP36/ACVR1B/KAT7/ARNT/B2M/STAT3/KLF13/ZFP36L1/LDB1/LYN	22
GO:0019882	GO:0019882	antigen processing and presentation	76/4092	229/17320	0.000602728	0.0052743	0.0040484	AP2B1/HFE/PSMA4/VAMP3/ATG5/AP3D1/KIF2A/PSME4/RAB7A/DYNC1I2/CAPZB/RAB10/DYNLL1/SNAP23/PSMD5/PSMD8/PSMB5/PSMA6/SEC23A/PSMA7/KIF3B/PSMD10/PSMD7/PSMA2/PSMD3/PSMD11/RAB5B/RAB35/LNPEP/SEC24A/PSMD14/CAPZA1/CLTA/PSMF1/PSMB2/CANX/PSMA1/PSME3/DCTN4/DYNC1LI2/PSMB7/ACTR1A/SEC31A/SEC24B/CLTC/PSMA5/ARF1/MARCHF1/YTHDF1/MFSD6/AP1S3/SAR1B/PSMC2/AP2M1/MARCHF8/RAB8B/B2M/AP1G1/DCTN5/RAB4A/RAB3B/KLC2/DCTN2/RAB6A/SEC2…	76
GO:0072666	GO:0072666	establishment of protein localization to vacuole	23/4092	51/17320	0.000605175	0.0052883	0.00405915	M6PR/LAMP2/AP3D1/RAB7A/VTI1B/MON1B/GOSR2/HSPA8/GNPTAB/VAMP7/VPS4A/VPS36/STAM/SCARB2/VPS37B/VTI1A/VPS37A/AP3M1/HGS/SMURF1/AP4M1/NCOA4/VPS13A	23
GO:0032606	GO:0032606	type I interferon production	46/4092	125/17320	0.000625821	0.00546107	0.00419176	DHX33/CREBBP/ITCH/XRCC5/MAVS/POLR2E/EP300/POLR3H/YY1/RNF125/RIPK2/PTPRS/TAX1BP1/NFKB1/POLR3G/STAT1/TRIM32/TRIM25/LRRFIP1/TICAM1/TRAF3/POLR3F/HSPD1/G3BP1/POLR2K/TIRAP/REL/AZI2/CTNNB1/POLR3D/POLR1C/MYD88/RELA/RNF26/POLR2L/PTPN11/SETD2/ZBTB20/NPLOC4/IRAK1/XRCC6/ILRUN/PCBP2/CHUK/DDX3X/ZCCHC3	46
GO:0006122	GO:0006122	mitochondrial electron transport, ubiquinol to cytochrome c	4092-09-01	13/17320	0.000629936	0.00546645	0.00419589	UQCR11/UQCRC2/UQCRB/UQCRFS1/MECP2/CYCS/UQCRH/CYC1/UQCR10	9
GO:0032968	GO:0032968	positive regulation of transcription elongation from RNA polymerase II promoter	4092-09-01	13/17320	0.000629936	0.00546645	0.00419589	CDK13/SUPT16H/TCERG1/GTF2F1/EAPP/CDC73/BRD4/ELOC/CDK12	9
GO:0150105	GO:0150105	protein localization to cell-cell junction	4092-09-01	13/17320	0.000629936	0.00546645	0.00419589	VCL/ACTB/TJP1/ACTN4/MPP7/DLG5/F11R/ACTG1/FLNA	9
GO:1900103	GO:1900103	positive regulation of endoplasmic reticulum unfolded protein response	4092-09-01	13/17320	0.000629936	0.00546645	0.00419589	BAX/XBP1/TMEM33/ATF6/PIK3R1/BCL2L11/PTPN2/PTPN1/ERN1	9
GO:0006356	GO:0006356	regulation of transcription by RNA polymerase I	16/4092	31/17320	0.000665981	0.00576322	0.00442369	DHX33/ZMPSTE24/NCL/HEATR1/IPPK/ATF4/NOL11/PWP1/ERBB2/POLR2K/WDR43/UTP15/POLR2L/MAF1/SIRT7/FLNA	16
GO:1904292	GO:1904292	regulation of ERAD pathway	16/4092	31/17320	0.000665981	0.00576322	0.00442369	HERPUD1/ATXN3/ERLEC1/DERL2/USP14/SGTA/CAV1/NFE2L2/UBAC2/UBQLN1/RNF185/TMEM259/UBE2G2/BCAP31/UBQLN2/UBE2J1	16
GO:0006487	GO:0006487	protein N-linked glycosylation	30/4092	73/17320	0.000683635	0.00589152	0.00452217	PGM3/FUT8/ST6GAL1/LMAN1/B4GALT1/MAGT1/DHDDS/RPN2/ALG2/MPDU1/DAD1/TMEM258/TMEM165/STT3A/DPM2/PMM2/NUS1/MGAT4B/STT3B/RPN1/DPAGT1/MCFD2/GFPT1/UBE2J1/OSTC/ALG3/OST4/DDOST/ALG11/MGAT2	30
GO:0042274	GO:0042274	ribosomal small subunit biogenesis	30/4092	73/17320	0.000683635	0.00589152	0.00452217	XRCC5/RPS5/SNU13/RPS16/RPS19/UTP25/HEATR1/FCF1/RCL1/RRP36/MRPS7/EMG1/NOL11/RPS6/RPS24/UTP4/NOB1/RPS8/ABT1/UTP23/SRFBP1/RPS14/TSR1/RPSA/RPL38/NPM1/RPS17/RPS27L/NOP9/RPS28	30
GO:0042795	GO:0042795	snRNA transcription by RNA polymerase II	30/4092	73/17320	0.000683635	0.00589152	0.00452217	CCNT2/CCNK/POLR2E/RPRD1B/POLR2C/TAF6/NCBP2/ELL2/RPAP2/GTF2F1/CCNT1/CDK9/INTS14/GTF2A2/RPRD1A/POU2F1/POLR2D/MEPCE/POLR2K/TAF5/GTF2E1/RPRD2/ICE1/SNAPC3/GTF2A1/SNAPC5/POLR2L/POLR2A/SP1/TAF9	30
GO:0048002	GO:0048002	antigen processing and presentation of peptide antigen	65/4092	191/17320	0.000690422	0.00593758	0.00455752	AP2B1/HFE/PSMA4/VAMP3/KIF2A/PSME4/RAB7A/DYNC1I2/CAPZB/DYNLL1/SNAP23/PSMD5/PSMD8/PSMB5/PSMA6/SEC23A/PSMA7/KIF3B/PSMD10/PSMD7/PSMA2/PSMD3/PSMD11/LNPEP/SEC24A/PSMD14/CAPZA1/CLTA/PSMF1/PSMB2/CANX/PSMA1/PSME3/DCTN4/DYNC1LI2/PSMB7/ACTR1A/SEC31A/SEC24B/CLTC/PSMA5/ARF1/MARCHF1/MFSD6/AP1S3/SAR1B/PSMC2/AP2M1/MARCHF8/B2M/AP1G1/DCTN5/KLC2/DCTN2/SEC24C/CALR/BCAP31/PSMD12/CAPZA2/CHUK/IFI30/DYNLL2/IDE/ITGAV/SEC…	65
GO:0000715	GO:0000715	nucleotide-excision repair, DNA damage recognition	13/4092	23/17320	0.000694682	0.00593758	0.00455752	COPS7A/RAD23B/PARP1/RPS27A/COPS7B/CETN2/UBC/CUL4B/COPS2/UBB/COPS8/UBA52/COPS4	13
GO:0035162	GO:0035162	embryonic hemopoiesis	13/4092	23/17320	0.000694682	0.00593758	0.00455752	KITLG/CCDC134/THOC5/HIF1A/STK4/STK3/SH2B3/VEGFA/KMT2A/MED1/ATF4/TGFBR2/PBX1	13
GO:0048026	GO:0048026	positive regulation of mRNA splicing, via spliceosome	13/4092	23/17320	0.000694682	0.00593758	0.00455752	THRAP3/DAZAP1/RBM3/HSPA8/PRPF19/NUP98/NCL/PRDX6/TRA2B/SF3B4/RBMX/TRA2A/RBMXL1	13
GO:1902410	GO:1902410	mitotic cytokinetic process	13/4092	23/17320	0.000694682	0.00593758	0.00455752	RHOA/CHMP2B/CHMP5/CHMP4B/CHMP3/VPS4B/CHMP1A/VPS4A/ARF1/CHMP7/PDCD6IP/NUP62/CHMP1B	13
GO:1903077	GO:1903077	negative regulation of protein localization to plasma membrane	13/4092	23/17320	0.000694682	0.00593758	0.00455752	GOPC/PPP2R5A/PICALM/TGFB1/TMEM59/RHOQ/LYPLA1/NUMB/TMBIM1/CLTC/AP2M1/BCL2L1/RSC1A1	13
GO:0007044	GO:0007044	cell-substrate junction assembly	38/4092	99/17320	0.000713698	0.00609178	0.00467588	VCL/ARHGAP6/RHOA/MAP4K4/ACTN1/CLASP1/TRIP6/ITGA6/ABL1/ARHGEF7/DUSP3/CORO1C/VEGFA/EPB41L5/SDC4/AJUBA/ROCK2/LAMC1/RAC1/PDPK1/PIP5K1A/WDPCP/PHLDB2/DST/PTPRK/DMTN/SMAD3/PTK2/LIMS1/PTEN/PEAK1/CD151/PLEC/RCC2/ACTG1/SRC/LDB1/SLK	38
GO:0009791	GO:0009791	post-embryonic development	34/4092	86/17320	0.000720753	0.00614361	0.00471566	RC3H2/PSEN1/BAX/ABL1/BPNT2/PPP1R13L/RAB3A/TGFBR1/PLEKHA1/CCDC47/VEGFA/ACVR2B/ASH1L/KDM5B/SERP1/ACO1/AGO2/BMP4/PLAGL2/IREB2/KLF4/SLC4A10/BCL2L11/NR4A2/TIPARP/SLC18A2/SGPL1/MECP2/CHST11/DHCR7/SMAD2/IGF2R/GIGYF2/HMGN1	34
GO:0099010	GO:0099010	modification of postsynaptic structure	4092-11-01	18/17320	0.000741804	0.00630584	0.00484019	CTNNA2/RHOA/PFN2/CDC42/CHMP2B/PFN1/WASF1/STAU1/MYH10/TIAM1/CYFIP1	11
GO:1900153	GO:1900153	positive regulation of nuclear-transcribed mRNA catabolic process, deadenylation-dependent decay	4092-11-01	18/17320	0.000741804	0.00630584	0.00484019	PABPC1/TNRC6A/TNRC6B/AGO2/CNOT1/ZFP36/TOB1/ZFP36L2/BTG2/ZFP36L1/CNOT7	11
GO:0002478	GO:0002478	antigen processing and presentation of exogenous peptide antigen	60/4092	174/17320	0.000747805	0.00634238	0.00486823	AP2B1/PSMA4/VAMP3/KIF2A/PSME4/RAB7A/DYNC1I2/CAPZB/DYNLL1/SNAP23/PSMD5/PSMD8/PSMB5/PSMA6/SEC23A/PSMA7/KIF3B/PSMD10/PSMD7/PSMA2/PSMD3/PSMD11/LNPEP/SEC24A/PSMD14/CAPZA1/CLTA/PSMF1/PSMB2/CANX/PSMA1/PSME3/DCTN4/DYNC1LI2/PSMB7/ACTR1A/SEC31A/SEC24B/CLTC/PSMA5/ARF1/MFSD6/AP1S3/SAR1B/PSMC2/AP2M1/B2M/AP1G1/DCTN5/KLC2/DCTN2/SEC24C/CALR/PSMD12/CAPZA2/CHUK/IFI30/DYNLL2/ITGAV/SEC24D	60
GO:0071478	GO:0071478	cellular response to radiation	64/4092	188/17320	0.000748133	0.00634238	0.00486823	CREBBP/HSPA5/OPN3/TP53BP1/NUCKS1/GNB1/XRCC5/ZMPSTE24/BAX/SIRT1/EP300/YY1/AKT2/NAMPT/TMEM109/METAP2/MAPK14/EGR1/CDKN1A/ELK1/ATF4/EIF2AK4/PDE6A/EIF2S1/CLOCK/MDM2/HUS1/NMT1/TANK/MYC/YAP1/TP53/SDE2/PARP1/RHOB/RHBDD1/PIK3R1/TLK2/HMGA2/PTPRK/MAPK13/CUL4B/RPL26/METAP1/NIPBL/SPIDR/TP53INP1/WRN/POLH/TRIAP1/BCL2L1/RAD9A/NET1/GRB2/NPM1/HSF1/H2AX/NOC2L/XRCC6/CALM1/FNTB/GNGT1/IMPACT/METTL3	64
GO:0016571	GO:0016571	histone methylation	51/4092	143/17320	0.000761716	0.00643893	0.00494235	CREBBP/KMT2E/JARID2/KMT2C/RIF1/MECOM/SIRT1/SETD1A/TTLL12/PRMT5/CTCF/SETD6/NSD2/KMT5B/PRDM4/ASH1L/RLF/RBBP5/KMT2A/PRMT1/DNMT1/MEN1/PWP1/RTF1/SETD1B/WDR61/SMAD4/BRD4/CARM1/SETD7/NSD3/PAXIP1/CHTOP/LMNA/DPY30/PYGO2/WDR82/NSD1/KMT2D/CTNNB1/SETD5/TET2/MECP2/SUZ12/SETD2/SIRT7/TET3/CTR9/MTF2/SUV39H2/PAXBP1	51
GO:0048041	GO:0048041	focal adhesion assembly	33/4092	83/17320	0.000762532	0.00643893	0.00494235	VCL/ARHGAP6/RHOA/MAP4K4/ACTN1/CLASP1/TRIP6/ABL1/ARHGEF7/DUSP3/CORO1C/VEGFA/EPB41L5/SDC4/AJUBA/ROCK2/RAC1/PDPK1/PIP5K1A/WDPCP/PHLDB2/PTPRK/DMTN/SMAD3/PTK2/LIMS1/PTEN/PEAK1/RCC2/ACTG1/SRC/LDB1/SLK	33
GO:0048863	GO:0048863	stem cell differentiation	85/4092	263/17320	0.000762614	0.00643893	0.00494235	JARID2/PSMA4/KITLG/FOXC1/EIF2AK2/CDK13/CBFB/PSME4/LRP6/TCF3/TEAD2/SEMA3A/ITCH/XRCC5/REST/EFNB1/PSMD5/SEMA4G/ABL1/PSMD8/SETD1A/MAPK1/PHF5A/HIF1A/PSMB5/PSMA6/PSMA7/PSMD10/PSMD7/SETD6/CDK6/PSMA2/BMPR1A/PSMD3/PSMD11/OCIAD1/CORO1C/SRF/HSPA9/FAM172A/ACVR1/PSMD14/NFE2L2/KLHL12/KMT2A/EPCAM/BMP4/SOX9/PSMF1/PSMB2/LIF/PSMA1/PSME3/PUM1/PWP1/PSMB7/YAP1/TCF12/TP53/SMAD4/PSMA5/HMGA2/ZFP36L2/HNRNPU/MSI2/RUNX1/PS…	85
GO:0051031	GO:0051031	tRNA transport	18/4092	37/17320	0.000779421	0.00657196	0.00504445	NDC1/YBX1/SEH1L/NUP50/NUP88/NUP98/NUP155/NUP43/NUP153/RAN/NUP54/NUP58/RANBP2/TOMM20/XPOT/POM121/NUP62/POM121C	18
GO:0043471	GO:0043471	regulation of cellular carbohydrate catabolic process	4092-08-01	11/17320	0.000788577	0.00662235	0.00508313	TIGAR/GSK3A/SCARB2/TP53/PGAM1/PPP1CA/PPP1R3B/PPP1CB	8
GO:0043619	GO:0043619	regulation of transcription from RNA polymerase II promoter in response to oxidative stress	4092-08-01	11/17320	0.000788577	0.00662235	0.00508313	HIF1A/EPAS1/NFE2L2/CHD6/ATF4/SESN2/ARNT/SIN3A	8
GO:0070203	GO:0070203	regulation of establishment of protein localization to telomere	4092-08-01	11/17320	0.000788577	0.00662235	0.00508313	CCT4/TCP1/DKC1/CCT6A/CCT5/CCT8/CCT3/CCT2	8
GO:2000756	GO:2000756	regulation of peptidyl-lysine acetylation	26/4092	61/17320	0.000793892	0.00665803	0.00511052	ATG5/ZMPSTE24/SIRT1/CTCF/ZNF451/PARK7/KMT2A/SET/SOX4/LIF/PRKAA1/WBP2/KAT7/ARRB1/GLYR1/SMAD4/PAXIP1/CTBP1/PYGO2/BRD7/SETD5/SIN3A/NOC2L/HDAC2/EID1/RPS6KA5	26
GO:0090130	GO:0090130	tissue migration	94/4092	296/17320	0.000795604	0.00666345	0.00511468	ITGA3/PIK3C2A/STRAP/MAP2K3/ATP2B4/PKN2/RHOA/PFN2/MAP4K4/CLASP1/SEMA3A/PTPN23/PXN/SIRT1/ABL1/MYH9/HIF1A/FERMT1/RAB11A/GPI/TGFB1/MET/HSPB1/TGFBR1/KANK1/PFN1/FBXW7/CORO1C/ATP5F1B/SRF/VEGFA/HBEGF/PDCD10/EPB41L5/RTN4/NFE2L2/LGALS8/NR4A1/RREB1/BMP4/SOX9/ID1/RRAS/PPARG/RAB25/ROCK2/ANXA1/GLUL/KLF4/PRCP/DNAJA4/MARVELD3/PDPK1/AKT1/EPHA2/RAB13/RHOB/WDPCP/IQSEC1/PTPRG/PLK2/ITGB1/DOCK1/ATP5F1A/NUS1/PAXIP1/ADI…	94
GO:0051091	GO:0051091	positive regulation of DNA-binding transcription factor activity	86/4092	267/17320	0.000801646	0.00670507	0.00514662	CFLAR/DHX33/MBTPS2/PRKCH/ZIC2/TAB2/EIF2AK2/HIPK2/TP53BP1/LRP6/TCF3/TFRC/MAP3K13/ERC1/MAVS/EP300/PSMA6/RIPK2/STK3/MTPN/CAV1/TRIM14/NFKB1/SRF/VEGFA/ATF2/PARK7/TRIM32/TRIM25/LRRFIP1/RBCK1/TICAM1/PPARG/TRIM5/FLOT2/KRAS/CLOCK/MAP3K7/PPP3CA/CRTC3/APP/AKT1/CARM1/BCL10/RPS27A/EPHA5/TRIM41/MTDH/PPRC1/RPS3/TIRAP/UBC/FER/SAV1/JMY/ADGRF1/CEBPG/PPARGC1B/LRP8/TAB3/EDA/PINK1/CRTC2/PRDX3/SMAD3/CTNNB1/STAT3/UBB/T…	86
GO:0010833	GO:0010833	telomere maintenance via telomere lengthening	32/4092	80/17320	0.000805353	0.00671808	0.00515661	PNKP/XRCC5/HSP90AA1/HNRNPC/HSP90AB1/MAPK1/TNKS2/PTGES3/CCT4/TCP1/TENT4B/HNRNPA2B1/GNL3L/DKC1/RPA1/TERF2/HNRNPA1/PARP1/NAF1/CCT6A/HMBOX1/CCT5/NEK7/HNRNPU/CCT8/CCT3/CCT2/CTNNB1/DCP2/TNKS/NOP10/SRC	32
GO:0033238	GO:0033238	regulation of cellular amine metabolic process	32/4092	80/17320	0.000805353	0.00671808	0.00515661	PSMA4/ATP2B4/PSME4/VPS35/COMT/PSMD5/PSMD8/PSMB5/PSMA6/PSMA7/PSMD10/PSMD7/OAZ1/PSMA2/PSMD3/PSMD11/PSMD14/ODC1/PARK7/PSMF1/PSMB2/PNKD/PSMA1/PSME3/PSMB7/PSMA5/SLC7A11/NR4A2/AZIN1/PSMC2/NQO1/PSMD12	32
GO:0010950	GO:0010950	positive regulation of endopeptidase activity	59/4092	171/17320	0.00080994	0.00674734	0.00517907	CFLAR/BID/FAS/CYFIP2/RHOA/PDCD2/PICALM/SENP1/REST/BAX/MUL1/SIRT1/BCL2L13/RIPK2/TNFRSF10A/CASP2/PERP/PSMD14/HSPE1/TNFRSF10B/HIP1/PSME3/PPARG/ROCK2/KHDC1/CIDEB/ANP32B/MYC/MTCH1/ARRB1/PML/PMAIP1/BCL10/HSPD1/ARL6IP5/RPS3/BCL2L11/XDH/VCP/SMAD3/STAT3/PRELID1/USP50/CYCS/ACER2/F2R/DIABLO/RPS27L/HSF1/BCAP31/MAPT/HMGB1/MBP/ASPH/RACK1/DDX3X/PDCD6/LYN/CARD8	59
GO:0097352	GO:0097352	autophagosome maturation	19/4092	40/17320	0.000814485	0.00677465	0.00520003	LAMP2/GABARAPL2/TSG101/SNAP29/CHMP3/ATG14/UBQLN1/CALCOCO2/STX17/GABARAPL1/MAP1LC3B/SNAPIN/RUBCN/UBQLN4/VCP/GABARAP/TMEM39A/SMCR8/LIX1L	19
GO:1901799	GO:1901799	negative regulation of proteasomal protein catabolic process	25/4092	58/17320	0.000815387	0.00677465	0.00520003	HFE/GABARAPL2/ERLEC1/DERL2/SENP1/WAC/HSP90AB1/USP14/SGTA/PARK7/PSMF1/UBAC2/MARCHF7/SDCBP/RPL11/TLK2/CCAR2/RYBP/CAMLG/BAG5/SMARCC1/UBE2G2/STYX/UBE2J1/TAF9	25
GO:0008630	GO:0008630	intrinsic apoptotic signaling pathway in response to DNA damage	39/4092	103/17320	0.000833932	0.00686846	0.00527204	BID/CD44/HIPK2/TNFRSF1A/BAX/SIRT1/ABL1/EP300/CASP2/TMEM109/TRIM32/CDKN1A/DYRK2/TPT1/CIDEB/MARCHF7/PML/TP53/EPHA2/MCL1/PIK3R1/NACC2/RPS3/BCL2L11/CCAR2/ZNF385A/RPL26/HIPK1/SHISA5/HNRNPK/DDIAS/TRIAP1/BCL2L1/RAD9A/PHLDA3/AEN/RPS27L/TAF9B/TAF9	39
GO:0009116	GO:0009116	nucleoside metabolic process	39/4092	103/17320	0.000833932	0.00686846	0.00527204	ENPP4/GNAI3/RHOA/DLG1/NT5C2/MAGI3/MTAP/GTPBP1/ERH/GMPR2/AHCY/PRPS2/DHODH/NME4/IMPDH1/RHOQ/AMD1/OARD1/PPAT/APOBEC3F/PUDP/RAN/NT5E/UCK2/CASK/PRPS1/AK3/DLG2/AK4/GMPS/TK1/IMPDH2/ADA/PNP/NME1/NME2/APOBEC3C/ADK/DCK	39
GO:0044068	GO:0044068	modulation by symbiont of host cellular process	14/4092	26/17320	0.000834373	0.00686846	0.00527204	ATG5/PABPN1/KPNA3/KPNB1/GAPDH/KPNA1/EIF2AK4/BCL2L11/SERPINB9/BCL2L1/KPNA2/KPNA4/ATG7/PHB2	14
GO:0046755	GO:0046755	viral budding	14/4092	26/17320	0.000834373	0.00686846	0.00527204	VTA1/TSG101/CHMP2B/CHMP5/CHMP4B/CHMP3/VPS4B/CHMP1A/VPS4A/VPS37B/CHMP7/VPS37A/PDCD6IP/CHMP1B	14
GO:1900739	GO:1900739	regulation of protein insertion into mitochondrial membrane involved in apoptotic signaling pathway	14/4092	26/17320	0.000834373	0.00686846	0.00527204	BID/PPP1R13B/YWHAE/TFDP2/YWHAH/YWHAQ/NMT1/TP53/PMAIP1/YWHAZ/YWHAB/YWHAG/TFDP1/PPP3R1	14
GO:1900740	GO:1900740	positive regulation of protein insertion into mitochondrial membrane involved in apoptotic signaling pathway	14/4092	26/17320	0.000834373	0.00686846	0.00527204	BID/PPP1R13B/YWHAE/TFDP2/YWHAH/YWHAQ/NMT1/TP53/PMAIP1/YWHAZ/YWHAB/YWHAG/TFDP1/PPP3R1	14
GO:1903649	GO:1903649	regulation of cytoplasmic transport	14/4092	26/17320	0.000834373	0.00686846	0.00527204	PTPN23/RAB21/MTMR2/EZR/MAPK1/SNX3/CHMP3/DENND10/RDX/MSN/SNX12/ARFIP1/MAP2K1/SRC	14
GO:0032873	GO:0032873	negative regulation of stress-activated MAPK cascade	21/4092	46/17320	0.000848474	0.00694727	0.00533253	PAFAH1B1/DLG1/ITCH/MECOM/DNAJA1/EZR/FKTN/DUSP3/HIPK3/GPS2/MEN1/TAOK3/MYC/MARVELD3/NCOR1/AKT1/PDCD4/FOXO1/PINK1/F2RL1/AIDA	21
GO:0070303	GO:0070303	negative regulation of stress-activated protein kinase signaling cascade	21/4092	46/17320	0.000848474	0.00694727	0.00533253	PAFAH1B1/DLG1/ITCH/MECOM/DNAJA1/EZR/FKTN/DUSP3/HIPK3/GPS2/MEN1/TAOK3/MYC/MARVELD3/NCOR1/AKT1/PDCD4/FOXO1/PINK1/F2RL1/AIDA	21
GO:0016575	GO:0016575	histone deacetylation	31/4092	77/17320	0.000848954	0.00694727	0.00533253	ATXN3/SREBF1/BAZ2A/REST/RCOR1/SIRT1/BRMS1L/TBL1X/SUDS3/VEGFA/HDAC1/MORF4L2/TP53/SIRT3/CAMK2D/MIDEAS/SKI/ELK4/PINK1/CTBP1/SMARCAD1/NIPBL/PHB/SIN3A/TBL1XR1/MORF4L1/SIRT7/HDAC2/MIER1/C6orf89/SFPQ	31
GO:0032527	GO:0032527	protein exit from endoplasmic reticulum	22/4092	49/17320	0.000850617	0.00694727	0.00533253	HERPUD1/ERLEC1/SEL1L/DERL2/SAR1A/TM9SF4/CD81/TMEM30A/FAF2/SELENOS/UBAC2/DERL1/RHBDD1/SEC16A/SAR1B/SYVN1/VCP/HSP90B1/NPLOC4/UBE2G2/BCAP31/UBE2J1	22
GO:0090342	GO:0090342	regulation of cell aging	22/4092	49/17320	0.000850617	0.00694727	0.00533253	YBX1/ARG2/ZMPSTE24/SIRT1/ABL1/CDK6/NAMPT/BMPR1A/NEK6/TERF2/KRAS/HMGA1/TP53/PLK2/HMGA2/LMNA/B2M/RSL1D1/PTEN/PAWR/ZKSCAN3/MARCHF5	22
GO:1990090	GO:1990090	cellular response to nerve growth factor stimulus	22/4092	49/17320	0.000850617	0.00694727	0.00533253	HSPA5/KIF1B/CBL/RAB35/WASF1/UBE3A/RAP1A/FOXO3/ID1/DYNC1LI2/USP8/PDPK1/EIF4A3/APP/AKT1/ARF6/CRK/EEF2/PTEN/BDNF/MAPT/CDC5L	22
GO:0040029	GO:0040029	regulation of gene expression, epigenetic	68/4092	203/17320	0.000857292	0.00699264	0.00536735	JARID2/BAZ1B/ARID1B/SMARCD1/POLR1A/ACTB/RIF1/YTHDC1/SIRT1/POLR2E/EP300/PABPC1L/RBBP7/CTCF/GSK3A/POLR1F/H2AZ2/ZMIZ1/SF3B1/ARID1A/ZMIZ2/MORF4L2/DEK/POLR1B/DNMT1/RLIM/WBP2/H3-3B/PPHLN1/HMGA1/CREBZF/POLR2K/SMARCA5/HNRNPU/CTBP1/RBBP4/DPY30/H2AZ1/DDX21/TAF1D/KMT2D/CTNNB1/BMI1/MECP2/SIN3A/PPM1D/POLR1C/EIF1/POLR2L/SUZ12/SERTAD2/PCGF5/PCGF3/MORF4L1/H2AX/H1-0/HMGB1/HDAC2/MYO1C/MIER1/GPX1/RBM15B/PCGF2/ASF1A…	68
GO:0001959	GO:0001959	regulation of cytokine-mediated signaling pathway	56/4092	161/17320	0.000870786	0.00709344	0.00544473	PAFAH1B1/IFNGR1/PIAS1/TNFRSF1A/CBFB/UBE2K/MAVS/MUL1/RFFL/HSP90AB1/TTLL12/HIF1A/RIPK2/CDC37/CAV1/TAX1BP1/BIRC2/SH2B3/STAT1/SUMO1/TRIM32/ELF1/MED1/RBCK1/PPARG/GPS2/SPATA2/IFNGR2/RUNX1/ADAR/JAK1/HIPK1/ABCE1/OTUD4/F2RL1/CREBRF/TRIM44/AXL/PTPN2/PTPN11/SHARPIN/IRAK1/YTHDF3/PTPN1/YTHDF2/CNOT7/RACK1/CHUK/CPNE1/TICAM2/LSM14A/IL7/CARD8/LIFR/OTULIN/METTL3	56
GO:1900542	GO:1900542	regulation of purine nucleotide metabolic process	44/4092	120/17320	0.000885061	0.00720034	0.00552678	NDC1/PDK3/ENO1/TIGAR/PSEN1/SEH1L/PDPR/NUP50/EP300/HIF1A/PRKAG2/NUP88/NUP98/NUP155/NUP43/NUP153/CBFA2T3/PRKAA1/NUP54/NUP58/NCOR1/APP/ARNT/PARP1/RANBP2/PINK1/JMJD8/AK4/PDP1/VCP/STAT3/ADORA2B/PFKFB3/INSR/PGAM1/PDP2/ZBTB7A/ZBTB20/PRKAG1/PPARA/POM121/NUP62/EIF6/POM121C	44
GO:0010827	GO:0010827	regulation of glucose transmembrane transport	30/4092	74/17320	0.000892999	0.00724605	0.00556186	ADIPOR2/MEF2A/OSBPL8/TRIB3/AKT2/GSK3A/GRB10/PRKAG2/CREBL2/MAPK14/NFE2L2/RAP1A/SLC2A1/RHOQ/ARPP19/SELENOS/AKT1/PIK3R1/BRAF/HK2/FGF19/PEA15/FABP5/STXBP4/IRS1/INSR/YES1/PTPN11/RSC1A1/APPL1	30
GO:0032481	GO:0032481	positive regulation of type I interferon production	30/4092	74/17320	0.000892999	0.00724605	0.00556186	DHX33/CREBBP/XRCC5/MAVS/POLR2E/EP300/POLR3H/RIPK2/NFKB1/POLR3G/STAT1/LRRFIP1/TICAM1/POLR3F/HSPD1/POLR2K/CTNNB1/POLR3D/POLR1C/MYD88/RELA/POLR2L/PTPN11/SETD2/ZBTB20/IRAK1/XRCC6/CHUK/DDX3X/ZCCHC3	30
GO:0009119	GO:0009119	ribonucleoside metabolic process	29/4092	71/17320	0.000937064	0.00759374	0.00582874	ENPP4/GNAI3/RHOA/DLG1/NT5C2/MAGI3/MTAP/GTPBP1/GMPR2/AHCY/NME4/IMPDH1/RHOQ/AMD1/APOBEC3F/RAN/NT5E/CASK/AK3/DLG2/AK4/GMPS/IMPDH2/ADA/PNP/NME1/NME2/APOBEC3C/ADK	29
GO:0010390	GO:0010390	histone monoubiquitination	15/4092	29/17320	0.000950368	0.00768163	0.0058962	ATXN7L3/KDM2B/WAC/SKP1/CDC73/CUL4B/RYBP/RNF168/BMI1/UBE2E1/PCGF5/PCGF3/CTR9/PCGF2/PCGF6	15
GO:0070979	GO:0070979	protein K11-linked ubiquitination	15/4092	29/17320	0.000950368	0.00768163	0.0058962	CDC27/RNF4/UBE2A/CDC23/UBE2W/UBE2D3/UBE2B/ANAPC13/UBE2E3/RNF26/CDC26/UBE2L3/UBE2H/ANAPC1/ANAPC10	15
GO:0060759	GO:0060759	regulation of response to cytokine stimulus	59/4092	172/17320	0.00095317	0.00769433	0.00590595	PAFAH1B1/IFNGR1/PIAS1/TNFRSF1A/CBFB/UBE2K/MAVS/MUL1/RFFL/HSP90AB1/TTLL12/HIF1A/RIPK2/TLE5/CDC37/CAV1/TAX1BP1/BIRC2/SH2B3/STAT1/SUMO1/TRIM32/ELF1/MED1/RBCK1/PPARG/GPS2/KLF4/SPATA2/IFNGR2/RUNX1/ADAR/JAK1/HIPK1/ABCE1/OTUD4/F2RL1/CREBRF/TRIM44/AXL/PTPN2/PTPN11/SHARPIN/IRAK1/YTHDF3/PTPN1/YTHDF2/CNOT7/RACK1/CHUK/CPNE1/TICAM2/LSM14A/TAF9/IL7/CARD8/LIFR/OTULIN/METTL3	59
GO:0090174	GO:0090174	organelle membrane fusion	40/4092	107/17320	0.000963886	0.00776295	0.00595862	SYT7/VAMP3/GNAI3/SYT1/RAB7A/CHMP2B/SNAP23/SNAP29/VTI1B/SPG11/ANKRD27/AKT2/RAB3A/CAV2/GOSR2/GOSR1/STX2/CHMP3/VAMP7/VPS4A/ANXA1/STX6/TGFBRAP1/TBC1D4/STXBP1/STX17/USO1/RAB13/SNAPIN/VTI1A/ATP13A2/RAB8B/STX3/RAB8A/KIF5B/VCPIP1/CALR/ANXA2/ANKFY1/VAMP2	40
GO:0043405	GO:0043405	regulation of MAP kinase activity	105/4092	338/17320	0.000964157	0.00776295	0.00595862	MAP3K9/SPAG9/MAP2K3/KITLG/TAB2/EIF2AK2/KARS1/MAP2K4/MAP3K13/TSG101/HACD3/PSEN1/DNAJA1/ERP29/MUL1/CRKL/MAPK1/TRIB3/RIPK2/TGFB1/PPP2R1A/CAV1/TGFBR1/DKK1/DUSP3/LAMTOR3/HIPK3/CD81/SH2B3/DUSP16/TPD52L1/MAPK14/STK38/VEGFA/HMGCR/PPP2CA/PDCD10/DUSP4/BMP4/AJUBA/GDF15/TRAF7/RAF1/PRKAA1/GPS2/KRAS/TAOK3/MAP3K7/ARRB1/DUSP5/DUSP6/MAP3K12/IGF1R/ERBB2/SOD1/MAP3K21/RPS27A/EGFR/RPS3/PDCD4/UBC/TIAM1/TAB3/BRAF/TAOK1…	105
GO:0009144	GO:0009144	purine nucleoside triphosphate metabolic process	33/4092	84/17320	0.000974757	0.00782812	0.00600865	GNAI3/PKM/RHOA/ENO1/VPS9D1/GTPBP1/NME4/TGFB1/IMPDH1/PRKAG2/ATP5F1B/ATP5PB/RHOQ/ATP5F1E/RAN/ATP5MC2/NUDT15/PARP1/AK3/ALDOA/ATP5F1A/ATP5MC3/PINK1/AK4/VCP/STAT3/IMPDH2/CYC1/ADA/NME1/ATP5MF/NME2/ADK	33
GO:0072384	GO:0072384	organelle transport along microtubule	33/4092	84/17320	0.000974757	0.00782812	0.00600865	PAFAH1B1/KIF1B/AP3D1/AP3M2/CDC42/FBXW11/NDE1/HIF1A/KIF3B/BLOC1S6/ARHGAP21/WASF1/MREG/VAMP7/RHOT1/KIF1C/RAB1A/SNAPIN/FEZ1/AP3S2/SUN1/NDEL1/UBB/KIF5B/RAB6A/AP3S1/TRAK1/AP3M1/LAMP1/BICD2/MAPT/BLOC1S2/BLOC1S5	33
GO:0010657	GO:0010657	muscle cell apoptotic process	28/4092	68/17320	0.00098062	0.00783347	0.00601275	CFLAR/MAP2K4/LRP6/TIGAR/GNB1/SIRT1/STK4/SOD2/E2F3/HMGCR/NFE2L2/MFN2/PAX8/ATF4/DNMT1/PPARG/ARRB1/PDPK1/ARRB2/TP53/CAMK2D/PDCD4/BAG3/CAPN2/PTEN/HSF1/GNGT1/DIPK2A	28
GO:0039702	GO:0039702	viral budding via host ESCRT complex	4092-12-01	21/17320	0.000981692	0.00783347	0.00601275	TSG101/CHMP2B/CHMP4B/CHMP3/VPS4B/CHMP1A/VPS4A/VPS37B/CHMP7/VPS37A/PDCD6IP/CHMP1B	12
GO:0046827	GO:0046827	positive regulation of protein export from nucleus	4092-12-01	21/17320	0.000981692	0.00783347	0.00601275	PRKACA/GSK3B/RBM22/PPM1A/YWHAE/XPO4/MDM2/ANP32B/TP53/TCF7L2/BAG3/EMD	12
GO:0098780	GO:0098780	response to mitochondrial depolarisation	4092-12-01	21/17320	0.000981692	0.00783347	0.00601275	HUWE1/MUL1/CDC37/MFN2/BECN1/ATG14/GPS2/PINK1/HK2/SQSTM1/ATG13/SMURF1	12
GO:1903204	GO:1903204	negative regulation of oxidative stress-induced neuron death	4092-12-01	21/17320	0.000981692	0.00783347	0.00601275	REST/FBXO7/HIF1A/PARK7/ATF4/NONO/SLC7A11/PINK1/OXR1/CTNNB1/ATG7/RACK1	12
GO:0008360	GO:0008360	regulation of cell shape	54/4092	155/17320	0.00102076	0.00808802	0.00620813	RHOA/WDR1/MARK2/DLG1/ZMPSTE24/EZR/MYH9/COCH/DNMBP/SLC9A3R1/VEGFA/RND3/MYL12B/RHOQ/GNA13/SEPTIN7/CDC42EP1/RAC2/MKLN1/DIAPH1/MYH10/ANXA1/RAC1/RDX/ANXA7/RHOF/RHOB/WDPCP/LIMD1/ARHGAP18/GNA12/MSN/FAM171A1/ALDOA/EPS8/RHOC/PALM2AKAP2/FMNL2/F11R/DMTN/CDC42SE2/EPB41/ARHGAP35/CDC42EP3/CRK/PTK2/DAG1/RHOG/PRPF40A/PLXNB2/CDC42SE1/CYFIP1/ITGA7/SHROOM3	54
GO:0045931	GO:0045931	positive regulation of mitotic cell cycle	54/4092	155/17320	0.00102076	0.00808802	0.00620813	POLDIP2/CDC27/KMT2E/PAFAH1B1/CUL3/PKN2/CDC23/ABL1/APEX1/CDC25B/RAB11A/RPS6KB1/DUSP3/CCND1/KLHL18/EIF4G1/TTL/VPS4B/USP22/EREG/BECN1/ANKRD17/ANXA1/CDK4/MDM2/RDX/NUSAP1/TMOD3/RB1/RPTOR/BRD4/APP/AKT1/EGFR/MEPCE/EIF4E/HNRNPU/CUL4B/TGFA/NIPBL/MECP2/SIN3A/INSR/RCC2/PTPN11/HSF1/PBX1/TFDP1/NUP62/PHB2/UBXN2B/DDX3X/MAD2L1/RAD51B	54
GO:0001732	GO:0001732	formation of cytoplasmic translation initiation complex	4092-10-01	16/17320	0.00102136	0.00808802	0.00620813	EIF3L/EIF3D/EIF5/EIF3J/EIF3E/EIF3B/EIF3A/EIF2S2/EIF3H/EIF3F	10
GO:0044827	GO:0044827	modulation by host of viral genome replication	4092-10-01	16/17320	0.00102136	0.00808802	0.00620813	NUCKS1/CCNK/VAPA/HSPA8/TBC1D20/EIF2AK4/STOM/FBXL2/PPIB/PHB	10
GO:0051444	GO:0051444	negative regulation of ubiquitin-protein transferase activity	4092-10-01	16/17320	0.00102136	0.00808802	0.00620813	PSEN1/ABL1/LIMK1/BAG2/PARK7/RPL5/RPL23/RPL11/BAG5/MAD2L1	10
GO:1904294	GO:1904294	positive regulation of ERAD pathway	4092-10-01	16/17320	0.00102136	0.00808802	0.00620813	HERPUD1/ATXN3/SGTA/CAV1/NFE2L2/UBQLN1/RNF185/TMEM259/BCAP31/UBQLN2	10
GO:0051205	GO:0051205	protein insertion into membrane	27/4092	65/17320	0.00102302	0.00809091	0.00621035	BID/TRAM2/TRAM1/HSP90AA1/BAX/PPP1R13B/TOMM22/SGTA/YWHAE/TFDP2/YWHAH/YWHAQ/NMT1/TP53/PMAIP1/EGFR/BCL2L11/OXA1L/MAIP1/YWHAZ/YWHAB/YWHAG/HSPA4/TIMM22/TFDP1/PPP3R1/GET4	27
GO:1903845	GO:1903845	negative regulation of cellular response to transforming growth factor beta stimulus	32/4092	81/17320	0.00103355	0.00816387	0.00626636	CFLAR/STRAP/HSPA5/GLG1/SIRT1/PPM1A/STUB1/TGFB1/CAV2/CAV1/TGFBR1/MTMR4/SMURF2/ZNF451/SNX6/PDPK1/TP53/RPS27A/UBC/SKI/TGFBR2/SPRED1/SMAD3/UBB/CHST11/LEMD3/SMAD2/ZBTB7A/BCL9L/SPRED2/SMURF1/UBA52	32
GO:0006282	GO:0006282	regulation of DNA repair	47/4092	131/17320	0.00103686	0.00817965	0.00627847	PNKP/FAM168A/TP53BP1/TIGAR/RIF1/SIRT1/TFIP11/UBR5/NSD2/KMT5B/CYREN/DEK/AUNIP/TRIM28/TERF2/SPIRE1/KAT7/CDK9/ACTR2/PML/PARP1/EGFR/RPS3/HMGA2/CEBPG/MMS19/EYA3/UBQLN4/MRNIP/ABRAXAS1/PPP4R2/RNF168/SPIDR/RNF169/UBE2V2/POLH/KLHL15/UBE2N/SETD2/HSF1/SIRT7/H2AX/ARID2/HMGB1/PARG/UBE2V1/GTF2I	47
GO:0006376	GO:0006376	mRNA splice site selection	16/4092	32/17320	0.00104182	0.00819808	0.00629261	YTHDC1/SF3A1/SF3A2/SETX/SRSF9/SRSF6/KHDC4/SRSF1/LUC7L2/RBMX/CELF1/SLU7/PSIP1/SF1/PRPF39/SRSF10	16
GO:0038128	GO:0038128	ERBB2 signaling pathway	16/4092	32/17320	0.00104182	0.00819808	0.00629261	HSP90AA1/CPNE3/STUB1/CDC37/ERBIN/HBEGF/SOS1/EREG/PTPN12/ERBB2/PIK3R1/EGFR/SHC1/GRB2/SRC/ERBB3	16
GO:0002066	GO:0002066	columnar/cuboidal epithelial cell development	26/4092	62/17320	0.00106347	0.0083579	0.00641529	PAFAH1B1/TIGAR/GSK3B/HIF1A/KLF5/GSK3A/CDK6/RHEB/SLC9A3R1/CDKN1A/BMP4/RARA/IL6ST/CLOCK/YAP1/SEC24B/PDPK1/SOD1/WDPCP/SIDT2/BMP6/FASN/YIPF6/SRC/LHFPL5/SLC4A7	26
GO:0019319	GO:0019319	hexose biosynthetic process	35/4092	91/17320	0.00108851	0.00854396	0.00655811	ENO1/PGM1/MAEA/SIRT1/SLC25A1/EP300/PGK1/SLC39A14/GPI/GAPDH/TPI1/GPD2/GOT1/GOT2/ATF4/ARPP19/SESN2/SELENOS/SORD/MDH2/SOGA1/ALDOA/FOXO1/RANBP2/CRTC2/ATF3/PGAM1/PTPN2/CHST15/PPARA/SIRT7/FAM3C/SLC35B4/PPP4R3B/NLN	35
GO:0045454	GO:0045454	cell redox homeostasis	25/4092	59/17320	0.001101	0.00862481	0.00662016	GCLC/GLRX2/DLD/TXNL1/APEX1/GSR/NFE2L2/PRDX1/PRDX6/TXNDC12/RAC2/SELENOS/TXN/TMX1/PDIA6/PDIA4/PRDX3/TMX3/NQO1/P4HB/ERO1A/TXNRD1/SELENOT/GPX1/TXNDC5	25
GO:0030038	GO:0030038	contractile actin filament bundle assembly	38/4092	101/17320	0.00110926	0.00862481	0.00662016	CUL3/ARHGAP6/RHOA/PFN2/CDC42/CLASP1/PXN/ABL1/TJP1/MET/LIMK1/TGFBR1/PFN1/TNFAIP1/SRF/ALMS1/STMN1/SDC4/MKKS/ROCK2/RAC1/ARRB1/PHLDB2/PIK3R1/EPHA1/FAM171A1/RHOC/BAG4/WASF2/F11R/ZYX/SMAD3/SH3PXD2B/PAK2/ACTG1/NF2/SRC/CD47	38
GO:0043149	GO:0043149	stress fiber assembly	38/4092	101/17320	0.00110926	0.00862481	0.00662016	CUL3/ARHGAP6/RHOA/PFN2/CDC42/CLASP1/PXN/ABL1/TJP1/MET/LIMK1/TGFBR1/PFN1/TNFAIP1/SRF/ALMS1/STMN1/SDC4/MKKS/ROCK2/RAC1/ARRB1/PHLDB2/PIK3R1/EPHA1/FAM171A1/RHOC/BAG4/WASF2/F11R/ZYX/SMAD3/SH3PXD2B/PAK2/ACTG1/NF2/SRC/CD47	38
GO:0000291	GO:0000291	nuclear-transcribed mRNA catabolic process, exonucleolytic	17/4092	35/17320	0.00110985	0.00862481	0.00662016	DIS3/DCPS/DDX6/CNOT6/LSM4/EXOSC2/WDR61/NT5C3B/CNOT8/PATL1/LSM3/DCP2/EDC3/CNOT7/DCP1A/EXOSC3/LSM1	17
GO:0032435	GO:0032435	negative regulation of proteasomal ubiquitin-dependent protein catabolic process	17/4092	35/17320	0.00110985	0.00862481	0.00662016	HFE/SENP1/WAC/HSP90AB1/USP14/SGTA/PARK7/SDCBP/RPL11/TLK2/CCAR2/RYBP/CAMLG/BAG5/SMARCC1/STYX/TAF9	17
GO:0050779	GO:0050779	RNA destabilization	17/4092	35/17320	0.00110985	0.00862481	0.00662016	KHSRP/TARDBP/HNRNPR/METTL16/ZFP36/ROCK2/PUM1/RC3H1/CNOT6L/FTO/YTHDF1/ZFP36L2/ZFP36L1/YTHDF3/YTHDF2/GIGYF2/METTL3	17
GO:0051443	GO:0051443	positive regulation of ubiquitin-protein transferase activity	17/4092	35/17320	0.00110985	0.00862481	0.00662016	DCUN1D1/TRIB3/STUB1/FBXW7/SKP1/RAB1A/ARRDC4/RPS2/PINK1/BMI1/PTEN/UBE2N/MAGEA2B/UBE2L3/DCUN1D3/MAGEA2/ARRDC3	17
GO:1901030	GO:1901030	positive regulation of mitochondrial outer membrane permeabilization involved in apoptotic signaling pathway	17/4092	35/17320	0.00110985	0.00862481	0.00662016	BID/GSK3B/BAX/PPP1R13B/GSK3A/YWHAE/TFDP2/YWHAH/YWHAQ/NMT1/TP53/PMAIP1/YWHAZ/YWHAB/YWHAG/TFDP1/PPP3R1	17
GO:0046777	GO:0046777	protein autophosphorylation	77/4092	237/17320	0.0011113	0.00862531	0.00662055	MAP3K9/EIF2AK2/PPP2R5A/PRKACA/MARK2/MAP3K13/PPP2R5C/GSK3B/EIF2AK1/ABL1/MKNK2/STK4/PIM2/STK24/NBN/CAV1/HTATIP2/CAMKK2/PPP2R5D/VEGFA/AAK1/ERRFI1/NEK6/RAP2C/RAP2A/EIF2AK4/TRIM28/EIF2S1/STK26/TAOK3/ACVR1B/MAP3K12/IGF1R/PDPK1/TOM1L1/MINK1/ERBB2/AKT1/MAP3K21/CALM2/CAMK2D/EGFR/EPHA1/FER/UHMK1/PPP2R5E/SMG1/DYRK1A/PINK1/ATP13A2/CALM3/TAOK1/LMTK2/CDK12/PTK2/SIK2/INSR/OXSR1/MAP3K11/PEAK1/MOB1B/YES1/CLK3/PAK…	77
GO:0022406	GO:0022406	membrane docking	61/4092	180/17320	0.00111339	0.00863086	0.00662481	MARK4/PAFAH1B1/VAMP3/SYT1/PRKACA/NDE1/NSF/CLASP1/RAB7A/DYNC1I2/HSP90AA1/RAB10/DYNLL1/EZR/SNAP29/VTI1B/MAPRE1/RAB11A/BLOC1S6/RAB3D/PPP2R1A/RAB3A/CAV2/YKT6/YWHAE/STX2/SNX3/ALMS1/ESYT2/TCTN3/VAPB/ATG14/TUBG1/STX6/STXBP1/STX17/HAUS2/ACTR1A/USO1/ESYT1/CSNK1D/RAB13/EXOC6B/MSN/CETN2/PDZD8/RAB8B/STX3/RAB8A/TUBA1A/RAB3B/YWHAG/CEP83/CTBP2/DCTN2/KIF24/CHP1/CEP290/CSNK1E/PRKAR2B/CEP57	61
GO:0032273	GO:0032273	positive regulation of protein polymerization	48/4092	135/17320	0.00115329	0.00889981	0.00683125	BAIAP2L1/NCKAP1/CTNNA2/RHOA/PFN2/CLASP1/DLG1/HSP90AA1/MAPRE1/MET/WASL/PFN1/SLAIN2/WASF1/ACTR3/VASP/CDC42EP1/SNX9/CLIP1/ARFIP2/SPIRE1/RAC1/ACTR2/ABI2/AP1AR/ARF1/RPS3/FER/JMY/BAG4/WASF2/PINK1/ARPC5/CDC42EP3/ARPC2/ARFIP1/ARF6/MECP2/GRB2/KIRREL1/DRG1/MAPT/GMFB/MYO1C/ARPC1A/BRK1/CYFIP1/CRACD	48
GO:0055076	GO:0055076	transition metal ion homeostasis	48/4092	135/17320	0.00115329	0.00889981	0.00683125	HFE/SLC30A9/CUL1/AP3D1/CYBRD1/TFRC/PICALM/EIF2AK1/FTL/HIF1A/XIAP/SLC39A14/CAND1/SKP1/ATP6V1A/STEAP3/EPAS1/FBXL5/CUTC/ACO1/NEDD8/NDFIP1/EGLN1/ISCU/IREB2/SLC31A1/MYC/SLC39A6/SMAD4/SOD1/APP/ARF1/SLC30A5/SLC25A37/BMP6/STEAP2/ATP13A2/SLC30A7/FLVCR1/B2M/FTH1/MT1E/SLC30A1/PRNP/SLC39A10/TMEM199/NCOA4/SRI	48
GO:0033143	GO:0033143	regulation of intracellular steroid hormone receptor signaling pathway	30/4092	75/17320	0.00115619	0.00889981	0.00683125	RNF14/RHOA/CBFB/PIAS2/SIRT1/EP300/DDX5/PARK7/HDAC1/CNOT1/MED1/RNF6/LATS1/WBP2/CLOCK/YAP1/NCOR1/ARRB2/CARM1/PARP1/CNOT9/RUNX1/HEYL/PHB/KMT2D/ZBTB7A/CALR/STRN3/SRC/PHB2	30
GO:0035872	GO:0035872	nucleotide-binding domain, leucine rich repeat containing receptor signaling pathway	18/4092	38/17320	0.00115663	0.00889981	0.00683125	TAB2/ITCH/XIAP/RIPK2/BIRC2/ERBIN/MAP3K7/RPS27A/UBC/TAB3/UBB/RNF34/RELA/UBE2N/IRAK1/UBA52/UBE2V1/OTULIN	18
GO:0097064	GO:0097064	ncRNA export from nucleus	18/4092	38/17320	0.00115663	0.00889981	0.00683125	NDC1/SEH1L/NUP50/NUP88/NUP98/NUP155/NCBP2/NUP43/NUP153/RAN/NUP54/NUP58/RANBP2/NPM1/XPOT/POM121/NUP62/POM121C	18
GO:1901068	GO:1901068	guanosine-containing compound metabolic process	18/4092	38/17320	0.00115663	0.00889981	0.00683125	GNAI3/RHOA/DLG1/MAGI3/GTPBP1/GMPR2/NME4/IMPDH1/RHOQ/RAN/CASK/AK3/DLG2/AK4/GMPS/IMPDH2/NME1/NME2	18
GO:1901879	GO:1901879	regulation of protein depolymerization	34/4092	88/17320	0.00116093	0.00892187	0.00684818	LIMA1/WDR1/CLASP1/CAPZB/ADD1/MID1/MTPN/SPTBN1/CAPZA1/CAMSAP2/DSTN/CAMSAP1/SWAP70/APC/CKAP2/TMOD1/RDX/TMOD3/TWF1/EPS8/DMTN/TAOK1/ATXN7/F2RL1/MID1IP1/CFL2/BMERB1/CFL1/ASPH/CAPZA2/IQANK1/ADD2/CRACD/TMOD2	34
GO:0031648	GO:0031648	protein destabilization	22/4092	50/17320	0.00118359	0.00904944	0.0069461	CREBBP/FBXL3/CUL3/VPS35/CHFR/FBXW11/MUL1/SIRT1/XBP1/EP300/FBXW7/UTP25/ID1/NR1D1/CDC73/MDM2/DERL1/SERF2/SENP2/RNF139/PRNP/SRC	22
GO:0000266	GO:0000266	mitochondrial fission	19/4092	41/17320	0.00118477	0.00904944	0.0069461	COX10/MTFR1/VPS35/DDHD2/MUL1/MIEF1/DDHD1/DHODH/MTFR1L/SPIRE1/CYRIB/PINK1/SLC25A46/TMEM135/MFF/MAPT/MARCHF5/MYO19/MCU	19
GO:0031062	GO:0031062	positive regulation of histone methylation	19/4092	41/17320	0.00118477	0.00904944	0.0069461	KMT2E/JARID2/RIF1/SIRT1/KMT2A/DNMT1/RTF1/WDR61/SMAD4/BRD4/NSD3/PAXIP1/CHTOP/LMNA/CTNNB1/MECP2/CTR9/MTF2/PAXBP1	19
GO:0050434	GO:0050434	positive regulation of viral transcription	19/4092	41/17320	0.00118477	0.00904944	0.0069461	RSF1/NUCKS1/POLR2E/EP300/NELFCD/POLR2C/ZNF639/GTF2F1/CCNT1/CDK9/POLR2D/POLR2K/CHD1/RRP1B/POLR2L/POLR2A/SP1/SUPT5H/SUPT4H1	19
GO:0098927	GO:0098927	vesicle-mediated transport between endosomal compartments	19/4092	41/17320	0.00118477	0.00904944	0.0069461	RAB7A/PTPN23/RAB21/MTMR2/EZR/MAPK1/ANKRD27/SNX3/CHMP3/DENND10/BECN1/RDX/RAB5A/MSN/SNX12/LMTK2/MAP2K1/SRC/EMP2	19
GO:0042158	GO:0042158	lipoprotein biosynthetic process	37/4092	98/17320	0.00118896	0.00905095	0.00694726	ZDHHC6/ATG5/PIGS/ZDHHC8/PIGH/PPM1A/ZDHHC2/RAB3GAP1/RAB3GAP2/PIGT/GLUL/ZDHHC4/ABHD17C/NMT1/DPM2/WDR45B/PIGK/RABL3/PYURF/ATG12/GOLGA7/UGCG/PGAP2/PIGF/ATG10/ZDHHC7/ZDHHC5/WIPI2/ZDHHC3/PGAP4/ZDHHC20/ZDHHC9/ATG7/PIGY/SELENOK/ZDHHC21/ZDHHC17	37
GO:0036003	GO:0036003	positive regulation of transcription from RNA polymerase II promoter in response to stress	13/4092	24/17320	0.00118931	0.00905095	0.00694726	MBTPS2/HSPA5/HIF1A/VEGFA/NFE2L2/ATF6/CHD6/ATF4/SESN2/TP53/ATF3/RBPJ/HSF1	13
GO:0099563	GO:0099563	modification of synaptic structure	13/4092	24/17320	0.00118931	0.00905095	0.00694726	CTNNA2/RHOA/PFN2/CDC42/CHMP2B/REST/ABL1/PFN1/WASF1/STAU1/MYH10/TIAM1/CYFIP1	13
GO:0018198	GO:0018198	peptidyl-cysteine modification	21/4092	47/17320	0.00119577	0.00908696	0.00697489	ZDHHC6/ATP2B4/ZDHHC8/ZDHHC2/RAB3D/GAPDH/PARK7/ZDHHC4/TXN/GOLGA7/ZDHHC7/ZDHHC3/OXR1/PRDX3/TMX3/RAB3B/RAB6A/ZDHHC20/ZDHHC9/ADH5/ZDHHC21	21
GO:0097178	GO:0097178	ruffle assembly	20/4092	44/17320	0.00119695	0.00908696	0.00697489	PFN2/CAV1/KANK1/PFN1/CORO1C/FAM98A/AIF1L/RAC1/RDX/DEF8/PIP5K1A/WDPCP/EPS8/BAG4/ARF6/NDEL1/RHOG/RCC2/CYFIP1/SNX10	20
GO:0051881	GO:0051881	regulation of mitochondrial membrane potential	29/4092	72/17320	0.00121931	0.00924541	0.00709652	GCLC/BID/CTNS/BAX/MUL1/ABL1/BNIP3L/AKT2/SLC25A36/PARK7/GOT1/PANK2/PMAIP1/SOD1/AKT1/PARP1/ARL6IP5/PINK1/VCP/PRDX3/PRELID1/UBB/BCL2L1/SLC25A33/PYCR1/MAPT/SRC/RACK1/PPA2	29
GO:0034502	GO:0034502	protein localization to chromosome	33/4092	85/17320	0.00123685	0.00936706	0.00718989	WAPL/XRCC5/CTCF/TNKS2/CENPA/CCT4/TCP1/MAU2/GNL3L/DKC1/RPA1/TERF2/PPHLN1/RB1/CARM1/CCT6A/CHMP7/CCT5/BUB3/CCT8/MRNIP/CCT3/GNL3/NIPBL/RAD21/SPIDR/CCT2/TPP1/TNKS/RCC2/SETD2/CHAMP1/MCM9	33
GO:2001022	GO:2001022	positive regulation of response to DNA damage stimulus	39/4092	105/17320	0.00127569	0.00964954	0.00740672	BCLAF1/PNKP/FAM168A/TIGAR/RIF1/SIRT1/DDX5/KMT5B/FXR1/TRIM28/SPIRE1/MYC/ACTR2/PMAIP1/PARP1/EGFR/NACC2/RPS3/HMGA2/CEBPG/MMS19/PAXIP1/EYA3/CCAR2/MRNIP/ZNF385A/RPL26/MSX1/ABRAXAS1/RNF168/SPIDR/SPRED1/RAD9A/UBE2N/H2AX/ARID2/HMGB1/SPRED2/GTF2I	39
GO:0008643	GO:0008643	carbohydrate transport	51/4092	146/17320	0.00129567	0.00978879	0.0075136	ADIPOR2/MEF2A/SLC23A2/OSBPL8/EZR/TRIB3/SLC35A2/AKT2/GSK3A/GRB10/PRKAG2/CREBL2/MAPK14/NFE2L2/RAP1A/SLC2A1/SLC35A3/RHOQ/SLC17A5/PLS1/SLC35B1/ARPP19/SESN2/SLC35D2/SELENOS/SLC35A5/SLC5A2/AKT1/PIK3R1/ZDHHC7/BRAF/SLC37A3/HK2/MFSD12/FGF19/PEA15/SLC35A1/FABP5/STXBP4/IRS1/SLC23A1/INSR/MFSD4B/SLC35A4/YES1/PTPN11/SLC5A3/SLC35B4/MFSD2B/RSC1A1/APPL1	51
GO:0006140	GO:0006140	regulation of nucleotide metabolic process	44/4092	122/17320	0.0013052	0.00984893	0.00755976	NDC1/PDK3/ENO1/TIGAR/PSEN1/SEH1L/PDPR/NUP50/EP300/HIF1A/PRKAG2/NUP88/NUP98/NUP155/NUP43/NUP153/CBFA2T3/PRKAA1/NUP54/NUP58/NCOR1/APP/ARNT/PARP1/RANBP2/PINK1/JMJD8/AK4/PDP1/VCP/STAT3/ADORA2B/PFKFB3/INSR/PGAM1/PDP2/ZBTB7A/ZBTB20/PRKAG1/PPARA/POM121/NUP62/EIF6/POM121C	44
GO:0010507	GO:0010507	negative regulation of autophagy	32/4092	82/17320	0.00131617	0.00990772	0.00760489	POLDIP2/TAB2/USP36/TIGAR/CHMP4B/NAMPT/MET/EIF4G2/EIF4G1/TBC1D14/TP53/FOXK2/AKT1/MCL1/RUBCN/TLK2/FEZ1/RRAGA/SMG1/TAB3/PINK1/UBQLN4/FOXK1/STAT3/PTK2/FEZ2/TMEM39A/SMCR8/RNF41/ZKSCAN3/ATG7/MTMR9	32
GO:1903533	GO:1903533	regulation of protein targeting	32/4092	82/17320	0.00131617	0.00990772	0.00760489	USP36/CSNK2A2/SREBF1/LMAN1/HUWE1/SH3GLB1/MIEF1/BNIP3L/NUCB1/AKT2/GSK3A/UBE2D3/FBXW7/VAMP7/RAC2/PRKAA1/ERBB2/SAE1/STOM/BAG3/BAG4/PINK1/DMTN/MFF/PRNP/ATG13/ARIH2/UBE2L3/CHP1/MYO1C/SREBF2/GDI1	32
GO:0010972	GO:0010972	negative regulation of G2/M transition of mitotic cell cycle	35/4092	92/17320	0.00136325	0.0102375	0.00785801	PSMA4/FOXN3/CUL1/PSME4/PSMD5/PSMD8/PSMB5/PSMA6/PSMA7/PSMD10/PSMD7/NBN/PSMA2/PSMD3/PSMD11/SKP1/PSMD14/CDKN1A/PSMF1/PSMB2/PSMA1/PSME3/VPS4A/TAOK3/HUS1/PSMB7/PSMA5/HMGA2/RAD17/DONSON/TAOK1/MRNIP/PSMC2/RAD21/PSMD12	35
GO:0031058	GO:0031058	positive regulation of histone modification	35/4092	92/17320	0.00136325	0.0102375	0.00785801	KMT2E/JARID2/SREBF1/RIF1/SIRT1/VEGFA/KMT2A/LIF/DNMT1/WBP2/KAT7/CDK9/ARRB1/RTF1/WDR61/GLYR1/TP53/SMAD4/BRD4/NSD3/PAXIP1/PINK1/CTBP1/CHTOP/LMNA/NIPBL/BRD7/CTNNB1/MECP2/UBE2N/C6orf89/CTR9/RPS6KA5/MTF2/PAXBP1	35
GO:0019054	GO:0019054	modulation by virus of host cellular process	4092-11-01	19/17320	0.0013866	0.0103292	0.00792841	PABPN1/KPNA3/KPNB1/KPNA1/EIF2AK4/BCL2L11/BCL2L1/KPNA2/KPNA4/ATG7/PHB2	11
GO:0045947	GO:0045947	negative regulation of translational initiation	4092-11-01	19/17320	0.0013866	0.0103292	0.00792841	EIF2AK1/EIF3E/PAIP2/AGO2/ATF4/EIF2AK4/EIF2S1/RPL13A/EIF4EBP2/LARP1/RBM4	11
GO:1902176	GO:1902176	negative regulation of oxidative stress-induced intrinsic apoptotic signaling pathway	4092-11-01	19/17320	0.0013866	0.0103292	0.00792841	SIRT1/HIF1A/HSPB1/SOD2/NFE2L2/PARK7/AKT1/NONO/PINK1/BAG5/GPX1	11
GO:0000054	GO:0000054	ribosomal subunit export from nucleus	4092-09-01	14/17320	0.00139365	0.0103292	0.00792841	XPO1/NUP88/RAN/ABCE1/NMD3/NPM1/NOP9/SDAD1/EIF6	9
GO:0032486	GO:0032486	Rap protein signal transduction	4092-09-01	14/17320	0.00139365	0.0103292	0.00792841	TIMP2/CBL/RAP1A/RAP2C/RAP2A/RAP1B/RDX/PLK2/RAP2B	9
GO:0032933	GO:0032933	SREBP signaling pathway	4092-09-01	14/17320	0.00139365	0.0103292	0.00792841	SREBF1/ERLIN1/FBXW7/SPRING1/LPCAT3/EIF2A/ERLIN2/AMFR/SREBF2	9
GO:0033750	GO:0033750	ribosome localization	4092-09-01	14/17320	0.00139365	0.0103292	0.00792841	XPO1/NUP88/RAN/ABCE1/NMD3/NPM1/NOP9/SDAD1/EIF6	9
GO:0034393	GO:0034393	positive regulation of smooth muscle cell apoptotic process	4092-09-01	14/17320	0.00139365	0.0103292	0.00792841	MAP2K4/STK4/SOD2/E2F3/MFN2/ATF4/PPARG/ARRB1/PDCD4	9
GO:0044794	GO:0044794	positive regulation by host of viral process	4092-09-01	14/17320	0.00139365	0.0103292	0.00792841	NUCKS1/VAPA/CAV2/HSPA8/TBC1D20/STOM/PPIB/CFL1/IGF2R	9
GO:0044804	GO:0044804	autophagy of nucleus	4092-09-01	14/17320	0.00139365	0.0103292	0.00792841	ATG5/WDR45B/ATG3/ATG12/WIPI2/ATG13/ATG7/ATG9A/RB1CC1	9
GO:1902188	GO:1902188	positive regulation of viral release from host cell	4092-09-01	14/17320	0.00139365	0.0103292	0.00792841	TSG101/CHMP2B/CHMP4B/VAPA/CAV2/CHMP3/VPS4B/VPS4A/VPS37B	9
GO:0030512	GO:0030512	negative regulation of transforming growth factor beta receptor signaling pathway	31/4092	79/17320	0.00139872	0.0103422	0.00793841	STRAP/HSPA5/GLG1/SIRT1/PPM1A/STUB1/TGFB1/CAV2/CAV1/TGFBR1/MTMR4/SMURF2/ZNF451/SNX6/PDPK1/TP53/RPS27A/UBC/SKI/TGFBR2/SPRED1/SMAD3/UBB/CHST11/LEMD3/SMAD2/ZBTB7A/BCL9L/SPRED2/SMURF1/UBA52	31
GO:1901224	GO:1901224	positive regulation of NIK/NF-kappaB signaling	31/4092	79/17320	0.00139872	0.0103422	0.00793841	EIF2AK2/RC3H2/RHOA/TRIP6/AGO1/EP300/NFAT5/TNFRSF10A/TNFRSF10B/RBCK1/AGO3/ACTN4/MAP3K7/RC3H1/APP/EGFR/RPS3/TIRAP/PDCD4/EDA/TRIM44/PHB/LIMS1/RELA/CALR/IRAK1/ZFP91/HMGB1/COPS8/PHB2/DDX3X	31
GO:0051893	GO:0051893	regulation of focal adhesion assembly	26/4092	63/17320	0.00140876	0.0103919	0.00797651	VCL/ARHGAP6/RHOA/MAP4K4/CLASP1/ABL1/DUSP3/CORO1C/VEGFA/EPB41L5/SDC4/ROCK2/RAC1/WDPCP/PHLDB2/DMTN/SMAD3/PTK2/LIMS1/PTEN/PEAK1/RCC2/ACTG1/SRC/LDB1/SLK	26
GO:0090109	GO:0090109	regulation of cell-substrate junction assembly	26/4092	63/17320	0.00140876	0.0103919	0.00797651	VCL/ARHGAP6/RHOA/MAP4K4/CLASP1/ABL1/DUSP3/CORO1C/VEGFA/EPB41L5/SDC4/ROCK2/RAC1/WDPCP/PHLDB2/DMTN/SMAD3/PTK2/LIMS1/PTEN/PEAK1/RCC2/ACTG1/SRC/LDB1/SLK	26
GO:0007041	GO:0007041	lysosomal transport	40/4092	109/17320	0.00145308	0.0107062	0.00821777	M6PR/LAMP2/AP3D1/VPS35/TSG101/RAB7A/CHMP2B/CHMP5/HMGXB4/MGRN1/TMEM106B/HSPA8/GNPTAB/CHMP3/VPS4B/VAMP7/ATG14/RBSN/VPS4A/TGFBRAP1/SCYL2/SCARB2/RNF157/SNX27/SNAPIN/ARF1/RHOB/PINK1/ATP13A2/VCP/AP1G1/TRAK1/AP3M1/HGS/ANKFY1/LAMP1/IGF2R/PSAP/AP4M1/NCOA4	40
GO:0051851	GO:0051851	modulation by host of symbiont process	25/4092	60/17320	0.00146903	0.0108109	0.00829817	NUCKS1/REST/CCNK/EP300/VAPA/CAV2/HSPA8/HDAC1/TARDBP/ZNF639/TBC1D20/EIF2AK4/CCNT1/STOM/HMGA2/FBXL2/CHD1/RRP1B/SUGT1/PPIB/PHB/CFL1/ANXA2/SP1/IGF2R	25
GO:0009205	GO:0009205	purine ribonucleoside triphosphate metabolic process	30/4092	76/17320	0.00148424	0.01091	0.00837424	GNAI3/PKM/RHOA/ENO1/VPS9D1/GTPBP1/NME4/TGFB1/IMPDH1/PRKAG2/ATP5F1B/ATP5PB/RHOQ/ATP5F1E/RAN/ATP5MC2/PARP1/AK3/ALDOA/ATP5F1A/ATP5MC3/PINK1/AK4/VCP/STAT3/IMPDH2/CYC1/NME1/ATP5MF/NME2	30
GO:0070198	GO:0070198	protein localization to chromosome, telomeric region	15/4092	30/17320	0.00148858	0.010929	0.00838883	XRCC5/TNKS2/CCT4/TCP1/GNL3L/DKC1/TERF2/CCT6A/CCT5/CCT8/CCT3/GNL3/CCT2/TPP1/TNKS	15
GO:0019884	GO:0019884	antigen processing and presentation of exogenous antigen	61/4092	182/17320	0.00151006	0.0110608	0.00848995	AP2B1/PSMA4/VAMP3/AP3D1/KIF2A/PSME4/RAB7A/DYNC1I2/CAPZB/DYNLL1/SNAP23/PSMD5/PSMD8/PSMB5/PSMA6/SEC23A/PSMA7/KIF3B/PSMD10/PSMD7/PSMA2/PSMD3/PSMD11/LNPEP/SEC24A/PSMD14/CAPZA1/CLTA/PSMF1/PSMB2/CANX/PSMA1/PSME3/DCTN4/DYNC1LI2/PSMB7/ACTR1A/SEC31A/SEC24B/CLTC/PSMA5/ARF1/MFSD6/AP1S3/SAR1B/PSMC2/AP2M1/B2M/AP1G1/DCTN5/KLC2/DCTN2/SEC24C/CALR/PSMD12/CAPZA2/CHUK/IFI30/DYNLL2/ITGAV/SEC24D	61
GO:0060491	GO:0060491	regulation of cell projection assembly	61/4092	182/17320	0.00151006	0.0110608	0.00848995	RALA/MARK4/IFT88/MAP4/ATG5/NCKAP1/PFN2/CDC42/FSCN1/CAPZB/VDAC3/PLEK2/KLF5/CAV1/WASL/TGFBR1/KANK1/PFN1/CORO1C/SRF/FXR1/ACTR3/ABITRAM/RHOQ/FAM98A/SEPTIN7/CDC42EP1/RAC2/PODXL/APC/RAC1/RDX/FNBP1L/ACTR2/TCHP/DEF8/MIEN1/EPHA2/WDPCP/RAB5A/ATG3/TWF1/FER/EPS8/WASF2/DMTN/ARHGAP35/CDC42EP3/ARPC2/F2RL1/ARF6/ATMIN/NDEL1/AKIRIN1/RHOG/RCC2/SEPTIN9/SRC/BRK1/CYFIP1/FAM110C	61
GO:0018209	GO:0018209	peptidyl-serine modification	102/4092	331/17320	0.0015125	0.0110657	0.00849372	CD44/PRKCH/HPF1/ATP2B4/WNK1/HIPK2/PKN2/PDK3/PFN2/CSNK2A2/PRKACA/TFRC/MARK2/MAP3K13/ARAF/HSP90AA1/GSK3B/BAX/HSP90AB1/PRKY/MKNK2/MAPK1/STK4/CSNK2A1/RIPK2/AKT2/TGFB1/GSK3A/CAV1/TGFBR1/DKK1/RPS6KB1/HIPK3/CREBL2/MAPK14/STK38/VEGFA/CSNK1A1/PDCD10/EIF4G1/PARK7/NEK6/MAPKAP1/DYRK2/LIF/LATS1/RAF1/PRKAA1/ROCK2/SRPK2/CAB39/PWP1/TXN/ARRB1/MAP3K12/PDPK1/GALNT1/ARRB2/CSNK1D/RPTOR/APP/AKT1/GALNT2/PARP1/CNOT9/CAM…	102
GO:0034968	GO:0034968	histone lysine methylation	42/4092	116/17320	0.00152061	0.011112	0.00852929	KMT2E/JARID2/KMT2C/RIF1/MECOM/SIRT1/SETD1A/TTLL12/SETD6/NSD2/KMT5B/ASH1L/RLF/RBBP5/KMT2A/DNMT1/MEN1/PWP1/RTF1/SETD1B/WDR61/SMAD4/BRD4/SETD7/NSD3/PAXIP1/LMNA/DPY30/PYGO2/WDR82/NSD1/KMT2D/CTNNB1/SETD5/TET2/MECP2/SUZ12/SETD2/TET3/CTR9/MTF2/SUV39H2	42
GO:0046148	GO:0046148	pigment biosynthetic process	24/4092	57/17320	0.00152585	0.0111373	0.00854868	COX10/SLC25A39/COX15/CTNS/FECH/CPOX/NFE2L1/SRRD/ASIP/PGRMC1/RPE65/PAICS/PPAT/IREB2/PPOX/SLC25A38/PRPS1/SLC7A11/GART/MFSD12/GMPS/SHMT2/ADA/APPL1	24
GO:0009100	GO:0009100	glycoprotein metabolic process	122/4092	406/17320	0.00157072	0.0114514	0.00878979	IDS/EXTL3/PGM3/FUT8/VCAN/SOAT1/GPC1/ST3GAL6/NDST1/SEL1L/DERL2/ST6GAL1/LMAN1/SLC35C2/PSEN1/POMGNT1/B4GALT1/GANAB/HIF1A/TRIP11/POFUT1/CST3/MAGT1/BPNT2/FKTN/MANBA/GALNT7/UGDH/GALNT18/GNPTAB/DSE/MAN1A1/HBEGF/GOLPH3/FAM20B/TMEM59/PARK7/EDEM3/B4GALT2/DHDDS/RPN2/ALG2/SERP1/CHST3/AGO2/CHPF/GCNT7/MPDU1/DAD1/PRKCSH/CHSY1/BCAN/TMEM258/TMEM165/STT3A/ITM2C/HS6ST1/DPM2/RAB1A/RNF185/PHLDA1/TMTC3/GCNT3/PMM2/GALN…	122
GO:0032479	GO:0032479	regulation of type I interferon production	44/4092	123/17320	0.00157438	0.0114616	0.00879762	DHX33/CREBBP/ITCH/XRCC5/MAVS/POLR2E/EP300/POLR3H/YY1/RNF125/RIPK2/PTPRS/TAX1BP1/NFKB1/POLR3G/STAT1/TRIM32/TRIM25/LRRFIP1/TICAM1/TRAF3/POLR3F/HSPD1/POLR2K/TIRAP/REL/CTNNB1/POLR3D/POLR1C/MYD88/RELA/RNF26/POLR2L/PTPN11/SETD2/ZBTB20/NPLOC4/IRAK1/XRCC6/ILRUN/PCBP2/CHUK/DDX3X/ZCCHC3	44
GO:0007566	GO:0007566	embryo implantation	23/4092	54/17320	0.00157762	0.0114616	0.00879762	FKBP4/VMP1/CST3/C1QBP/SMURF2/VEGFA/STC2/ARID1A/AGO2/POLR1B/LIF/TRIM28/H3-3B/ACVR1B/SOD1/UBE2Q1/RPL29/TGFBR2/BSG/CALR/RXRA/EMP2/H3-3A	23
GO:0030834	GO:0030834	regulation of actin filament depolymerization	23/4092	54/17320	0.00157762	0.0114616	0.00879762	LIMA1/WDR1/CAPZB/ADD1/MTPN/SPTBN1/CAPZA1/DSTN/SWAP70/TMOD1/RDX/TMOD3/TWF1/EPS8/DMTN/F2RL1/CFL2/CFL1/CAPZA2/IQANK1/ADD2/CRACD/TMOD2	23
GO:0010762	GO:0010762	regulation of fibroblast migration	16/4092	33/17320	0.00158248	0.0114835	0.00881443	RFFL/ARHGEF7/TGFB1/CORO1C/SDC4/AKAP12/AKT1/WDPCP/GNA12/ITGB1/FER/BAG4/DMTN/PTK2/RCC2/APPL1	16
GO:0032206	GO:0032206	positive regulation of telomere maintenance	22/4092	51/17320	0.0016224	0.0117459	0.00901584	PNKP/XRCC5/MAPK1/NBN/TNKS2/CCT4/TCP1/HNRNPA2B1/DKC1/HNRNPA1/PML/NAF1/CCT6A/HMBOX1/CCT5/NEK7/CCT8/CCT3/GNL3/CCT2/CTNNB1/TNKS	22
GO:0048255	GO:0048255	mRNA stabilization	22/4092	51/17320	0.0016224	0.0117459	0.00901584	THRAP3/YBX3/YBX1/ELAVL1/PABPC1/HNRNPC/MAPK14/TENT5A/TENT4A/TARDBP/TENT4B/METTL16/ZFP36/SYNCRIP/TIRAP/HNRNPU/LARP1/MYD88/HNRNPA0/MEIOC/TAF15/PAIP1	22
GO:0033572	GO:0033572	transferrin transport	17/4092	36/17320	0.0016442	0.0118763	0.0091159	HFE/ATP6V0A1/TFRC/ATP6V1D/ATP6V0E1/ATP6V1A/STEAP3/ATP6V0B/ATP6V1E1/CLTC/ATP6V1C2/ATP6V1B2/ATP6V1C1/LMTK2/ARHGAP1/RAB11B/ATP6V0C	17
GO:0060323	GO:0060323	head morphogenesis	17/4092	36/17320	0.0016442	0.0118763	0.0091159	LRP6/EP300/PLEKHA1/DKK1/RAB3GAP1/RRAS/SSBP3/SKI/FLVCR1/MSX1/TIPARP/NIPBL/SGPL1/ANKRD11/PTPN11/ATP6AP2/ASPH	17
GO:0035088	GO:0035088	establishment or maintenance of apical/basal cell polarity	21/4092	48/17320	0.00165784	0.0119334	0.00915973	RHOA/CDC42/WDR1/MARK2/FSCN1/DLG1/FAT1/SLC9A3R1/PTK7/ERBIN/MSN/PARD3/LIN7C/DLG2/DLG5/ARF4/CLIC4/PDCD6IP/OOEP/SYNJ2BP/MYO9A	21
GO:0061245	GO:0061245	establishment or maintenance of bipolar cell polarity	21/4092	48/17320	0.00165784	0.0119334	0.00915973	RHOA/CDC42/WDR1/MARK2/FSCN1/DLG1/FAT1/SLC9A3R1/PTK7/ERBIN/MSN/PARD3/LIN7C/DLG2/DLG5/ARF4/CLIC4/PDCD6IP/OOEP/SYNJ2BP/MYO9A	21
GO:1990928	GO:1990928	response to amino acid starvation	21/4092	48/17320	0.00165784	0.0119334	0.00915973	RRAGD/FAS/EIF2AK2/SESN1/SEH1L/SH3GLB1/MAPK1/HNRNPL/RRAGC/CDKN1A/ATF4/EIF2AK4/SESN2/EIF2S1/SLC38A2/EIF2A/SESN3/LARP1/RRAGA/ATF3/IMPACT	21
GO:0042180	GO:0042180	cellular ketone metabolic process	80/4092	251/17320	0.00166529	0.0119732	0.00919031	ADIPOR2/ELOVL5/PSMA4/ATP2B4/PDK3/PSME4/SREBF1/NFE2L1/REST/COQ9/PDPR/COMT/PSMD5/SIRT1/PSMD8/PSMB5/PSMA6/PSMA7/TRIB3/PSMD10/LONP2/PSMD7/OAZ1/AKT2/CAV1/PSMA2/PRKAG2/ERLIN1/PSMD3/PSMD11/TPI1/HMGCR/GPD2/PSMD14/COQ10B/ODC1/PARK7/KDSR/EGR1/LPGAT1/GLO1/GOT2/SOX9/PANK2/PSMF1/PSMB2/NR1D1/PNKD/PSMA1/PSME3/PRKAB2/PPARG/ANXA1/NMT1/PSMB7/KYAT3/NCOR1/AKT1/PSMA5/CBR4/ERLIN2/SLC7A11/BMP6/AZIN1/ADIPOR1/PSMC2/FGF19…	80
GO:0014037	GO:0014037	Schwann cell differentiation	18/4092	39/17320	0.0016783	0.0120047	0.00921448	GPC1/MPP5/NDRG1/AKT2/ADGRG6/NAB1/SOD1/AKT1/PARD3/SKI/SLC25A46/NAB2/RELA/DAG1/LAMA2/NF1/ERBB3/DICER1	18
GO:0032506	GO:0032506	cytokinetic process	18/4092	39/17320	0.0016783	0.0120047	0.00921448	RHOA/CHMP2B/CHMP5/MYH9/CHMP4B/CHMP3/VPS4B/ANXA11/SNX9/CHMP1A/VPS4A/SPIRE1/ARF1/CHMP7/PDCD6IP/SNX18/NUP62/CHMP1B	18
GO:0070317	GO:0070317	negative regulation of G0 to G1 transition	18/4092	39/17320	0.0016783	0.0120047	0.00921448	CBX5/RBBP8/RBBP7/PHC1/TFDP2/CBX3/MAX/RBBP4/RYBP/BMI1/E2F6/RRM2/PHC3/MGA/SUZ12/TFDP1/PCGF2/PCGF6	18
GO:1902229	GO:1902229	regulation of intrinsic apoptotic signaling pathway in response to DNA damage	18/4092	39/17320	0.0016783	0.0120047	0.00921448	BID/CD44/SIRT1/TRIM32/TPT1/MARCHF7/NACC2/RPS3/CCAR2/ZNF385A/RPL26/HNRNPK/DDIAS/TRIAP1/BCL2L1/RAD9A/TAF9B/TAF9	18
GO:0010761	GO:0010761	fibroblast migration	20/4092	45/17320	0.0016812	0.0120047	0.00921448	RFFL/ARHGEF7/TGFB1/ZFAND5/CORO1C/SDC4/AKAP12/PML/AKT1/PIP5K1A/WDPCP/GNA12/ITGB1/FER/BAG4/DMTN/SGPL1/PTK2/RCC2/APPL1	20
GO:1903214	GO:1903214	regulation of protein targeting to mitochondrion	20/4092	45/17320	0.0016812	0.0120047	0.00921448	USP36/CSNK2A2/SREBF1/LMAN1/HUWE1/SH3GLB1/BNIP3L/GSK3A/UBE2D3/FBXW7/RAC2/PRKAA1/SAE1/BAG3/BAG4/PINK1/ATG13/ARIH2/UBE2L3/SREBF2	20
GO:2000772	GO:2000772	regulation of cellular senescence	19/4092	42/17320	0.00168925	0.0120484	0.00924805	YBX1/ARG2/ZMPSTE24/SIRT1/ABL1/CDK6/NAMPT/BMPR1A/NEK6/TERF2/KRAS/HMGA1/TP53/PLK2/HMGA2/B2M/RSL1D1/PAWR/ZKSCAN3	19
GO:0002089	GO:0002089	lens morphogenesis in camera-type eye	4092-12-01	22/17320	0.00169758	0.0120528	0.00925142	HIPK2/NECTIN1/BMP4/TBC1D20/ATF4/ABI2/EPHA2/SHROOM2/SKI/HIPK1/CTNNB1/NECTIN3	12
GO:0010499	GO:0010499	proteasomal ubiquitin-independent protein catabolic process	4092-12-01	22/17320	0.00169758	0.0120528	0.00925142	PSMA4/PSME4/PSMB5/PSMA6/PSMA7/PSMA2/NFE2L2/PSMB2/PSMA1/PSMB7/PSMA5/ENC1	12
GO:0035970	GO:0035970	peptidyl-threonine dephosphorylation	4092-12-01	22/17320	0.00169758	0.0120528	0.00925142	PPM1A/PPP2CB/DUSP16/PPP2CA/PPM1G/DUSP4/DUSP5/DUSP6/DUSP7/PDP1/PPM1D/PPP1CA	12
GO:0070102	GO:0070102	interleukin-6-mediated signaling pathway	4092-12-01	22/17320	0.00169758	0.0120528	0.00925142	CBL/STAT1/IL6ST/YAP1/SMAD4/FER/JAK1/STAT3/PTPN2/PTPN11/SRC/CTR9	12
GO:0090175	GO:0090175	regulation of establishment of planar polarity	40/4092	110/17320	0.00177036	0.0125553	0.00963711	AP2B1/PSMA4/RHOA/PSME4/CDC42/PSMD5/ABL1/PSMD8/PSMB5/PSMA6/PSMA7/PSMD10/PSMD7/FZD3/PSMA2/DKK1/PSMD3/PFN1/PSMD11/SMURF2/PTK7/PSMD14/PSMF1/PSMB2/PSMA1/PSME3/RAC1/PSMB7/SEC24B/CLTC/ARRB2/PSMA5/TIAM1/PSMC2/DVL3/AP2M1/FZD6/VANGL1/PSMD12/SMURF1	40
GO:0071902	GO:0071902	positive regulation of protein serine/threonine kinase activity	104/4092	340/17320	0.00178923	0.0126747	0.00972875	MAP3K9/DBF4/SPAG9/MAP2K3/KITLG/TAB2/EIF2AK2/ATP2B4/KARS1/MAP2K4/RHOA/MAP3K13/HACD3/PSEN1/CCNT2/ERP29/CCNK/MUL1/HSP90AB1/SIRT1/CRKL/MAPK1/STK4/PSMD10/RIPK2/STK3/TGFB1/TGFBR1/DKK1/CCNY/LAMTOR3/CCND1/CD81/TPD52L1/MAPK14/VEGFA/PPP2CA/PDCD10/CKS2/BMP4/CCNT1/AJUBA/GDF15/TRAF7/RAF1/PRKAA1/KRAS/TAOK3/MAP3K7/CAB39/ARRB1/DUSP5/DUSP6/MAP3K12/RPTOR/ERBB2/SOD1/AKT1/MAP3K21/CALM2/RPS27A/EGFR/RPS3/HMGA2/UBC/TIA…	104
GO:2001056	GO:2001056	positive regulation of cysteine-type endopeptidase activity	51/4092	148/17320	0.00181366	0.0128332	0.00985042	CFLAR/BID/FAS/CYFIP2/RHOA/PDCD2/SENP1/REST/BAX/MUL1/SIRT1/BCL2L13/RIPK2/TNFRSF10A/CASP2/PERP/HSPE1/TNFRSF10B/HIP1/PPARG/KHDC1/CIDEB/ANP32B/MYC/MTCH1/ARRB1/PML/PMAIP1/BCL10/HSPD1/ARL6IP5/RPS3/BCL2L11/XDH/VCP/SMAD3/USP50/CYCS/ACER2/F2R/DIABLO/RPS27L/HSF1/BCAP31/MAPT/HMGB1/ASPH/RACK1/DDX3X/PDCD6/CARD8	51
GO:0007052	GO:0007052	mitotic spindle organization	42/4092	117/17320	0.00183858	0.0129949	0.0099745	ZNF207/MAP4/RHOA/KIF2A/SMC1A/CLASP1/CHMP2B/CHMP5/EFHC1/KIF3B/CHMP4B/XIAP/STAG2/RAB11A/BCCIP/KPNB1/STMN1/STAG1/PTPA/VPS4B/SBDS/GNAI1/CHMP1A/TUBG1/RAN/CLTC/PLK2/TACC1/HNRNPU/CCSAP/ABRAXAS1/VCP/ABRAXAS2/MECP2/TNKS/DCTN2/RCC1/DRG1/FLNA/NUP62/CHMP1B/TBCE	42
GO:0006360	GO:0006360	transcription by RNA polymerase I	26/4092	64/17320	0.00184634	0.0130202	0.00999395	DHX33/POLR1A/BAZ2A/ZMPSTE24/RRN3/POLR2E/POLR1F/GTF2H3/NCL/HEATR1/POLR1B/IPPK/ATF4/NOL11/PWP1/ERBB2/POLR2K/WDR43/UTP15/TAF1D/POLR1C/CAVIN1/POLR2L/MAF1/SIRT7/FLNA	26
GO:0010660	GO:0010660	regulation of muscle cell apoptotic process	26/4092	64/17320	0.00184634	0.0130202	0.00999395	CFLAR/MAP2K4/LRP6/TIGAR/SIRT1/STK4/SOD2/E2F3/HMGCR/NFE2L2/MFN2/PAX8/ATF4/DNMT1/PPARG/ARRB1/PDPK1/ARRB2/TP53/CAMK2D/PDCD4/BAG3/CAPN2/PTEN/HSF1/DIPK2A	26

## Sheet: HCT116 only
	ID	Description	GeneRatio	BgRatio	pvalue	p.adjust	qvalue	geneID	Count
GO:0072331	GO:0072331	signal transduction by p53 class mediator	45/1133	266/17320	3.6102e-09	2.20583e-05	2.08974e-05	BCL3/RRN3/BAX/PCBP4/RFFL/PRMT5/SNW1/NBN/PPP1R13L/CASP2/PRKAG2/HDAC1/PLAGL1/PRMT1/TAF4/SESN2/PRKAA1/PCNA/HUS1/TAF4B/AKT1/CNOT9/TAF5/SSRP1/RAD9B/PAXIP1/DYRK1A/MSX1/WRN/UBB/PPM1D/TRIAP1/RAD9A/PHLDA3/SFN/ACER2/AEN/MAGEA2B/RPS27L/E2F4/MAGEA2/TAF9/DYRK2/PRKAB2/TOP3A	45
GO:0022613	GO:0022613	ribonucleoprotein complex biogenesis	52/1133	435/17320	1.81179e-05	0.0466131	0.0441598	GEMIN5/RPS5/RRN3/SNU13/PRMT5/MTG2/SF3A2/RPS19/EIF3B/SETX/RPS15/SF3B1/NSUN4/RCL1/WDR55/MRM2/SRSF6/MRPS7/METTL16/LSM4/RPL27/TRAF7/SCAF11/UTP4/ISG20L2/SNRPG/SNRNP200/POLR2D/NAF1/ABT1/CPSF7/SRFBP1/MALSU1/RPUSD3/MRPL10/TFB2M/UTP15/DCAF13/RPL10L/TRMT112/RPL35A/RPS27L/SIRT7/MAK16/RPL10A/RPS28/ZNHIT3/TAF9/BRIX1/KAT2B/NMD3/RIOX2	52
GO:0043161	GO:0043161	proteasome-mediated ubiquitin-dependent protein catabolic process	50/1133	421/17320	3.10265e-05	0.0466131	0.0441598	CDC27/CUL3/HERPUD1/CHFR/KLHL20/MAEA/RFFL/PSMD8/RBX1/PSMA6/STUB1/UBE2W/SGTA/DMAC2/SMURF2/TRIM2/AREL1/PSMF1/SELENOS/HSPBP1/RNF185/GID4/ANAPC11/AKT1/PSMA5/RPS27A/SPOPL/FBXL2/CCAR2/ZER1/RYBP/RCHY1/CAMLG/BAG5/FBXO22/KCTD5/CTNNB1/RNF187/TMUB2/UBB/FBXO45/KCTD13/FBXW8/STYX/TAF9/KLHL42/DESI1/UCHL5/CBFA2T3/USP7	50
GO:0043281	GO:0043281	regulation of cysteine-type endopeptidase activity involved in apoptotic process	30/1133	209/17320	4.03736e-05	0.0466131	0.0441598	CFLAR/FAS/HERPUD1/PDCD2/REST/BAX/MUL1/RFFL/TNFRSF10A/CASP2/CTSD/PRDX5/RAF1/LAMTOR5/KHDC1/KLF4/AKT1/BCL10/ARL6IP5/BCL2L11/SH3RF1/BEX3/SMAD3/TRIAP1/SFN/ACER2/RPS27L/MAGEA3/PPARG/MICAL1	30
GO:0030330	GO:0030330	DNA damage response, signal transduction by p53 class mediator	19/1133	107/17320	5.95078e-05	0.0466131	0.0441598	BCL3/BAX/PCBP4/NBN/CASP2/PLAGL1/PRMT1/SESN2/PCNA/CNOT9/PAXIP1/DYRK1A/MSX1/PPM1D/TRIAP1/SFN/ACER2/RPS27L/E2F4	19
GO:0010498	GO:0010498	proteasomal protein catabolic process	54/1133	480/17320	6.72981e-05	0.0466131	0.0441598	CDC27/GABARAPL2/CUL3/HERPUD1/CHFR/KLHL20/MAEA/RFFL/PSMD8/RBX1/PSMA6/STUB1/UBE2W/SGTA/DMAC2/SMURF2/TRIM2/AREL1/PSMF1/SELENOS/SCO1/HSPBP1/RNF185/GID4/ANAPC11/AKT1/PSMA5/RPS27A/SPOPL/FBXL2/CCAR2/ZER1/RYBP/RCHY1/CAMLG/BAG5/FBXO22/KCTD5/CTNNB1/RNF187/TMUB2/UBB/FBXO45/KCTD13/FBXW8/STYX/GET4/TAF9/KLHL42/DESI1/UCHL5/CBFA2T3/TMEM259/USP7	54
GO:0006352	GO:0006352	DNA-templated transcription, initiation	33/1133	246/17320	6.7506e-05	0.0466131	0.0441598	MED24/POLR1A/RRN3/BAX/SNW1/SETX/E2F3/SRF/MED20/POLR1B/TAF4/TRIM28/CDK4/TAF4B/POLR2D/TAF5/NR4A2/PAXIP1/MAML1/TFB2M/CTNNB1/PPM1D/ESRRA/FOSL1/NR2F1/NR2C2/CRCP/TAF9/KAT2B/PPARG/MED4/POLR1C/MED14	33
GO:0140053	GO:0140053	mitochondrial gene expression	25/1133	165/17320	7.10718e-05	0.0466131	0.0441598	MRPS10/MRPS33/ALKBH1/MTG2/MRPL4/MTRF1L/MRPS30/NSUN4/MRPS7/MRPS25/PRKAA1/MRRF/MRPL49/MALSU1/RPUSD3/MRPL10/TFB2M/FASTKD5/MRPS6/CHCHD10/MRPL45/IARS2/METTL4/PPARGC1B/MRPL33	25
GO:1900180	GO:1900180	regulation of protein localization to nucleus	21/1133	127/17320	7.3702e-05	0.0466131	0.0441598	CDH1/POLR1A/NUTF2/PIK3R2/LZTS2/TCP1/LIF/TRIM28/SESN2/LAMTOR5/AKT1/MEPCE/MFHAS1/BAG3/ATP13A2/SMAD3/TRIM8/ILRUN/NUP62/SUFU/NMD3	21
GO:1903320	GO:1903320	regulation of protein modification by small protein conjugation or removal	32/1133	237/17320	7.62898e-05	0.0466131	0.0441598	CUL3/HERPUD1/U2AF2/CHFR/MUL1/RBX1/STUB1/TGFBR1/HSPBP1/FEM1A/AKT1/SAE1/BCL10/SPOPL/PAXIP1/RNF111/PEF1/RCHY1/SENP2/CAMLG/BAG5/CTNNB1/UBB/RELA/PARP10/MAGEA2B/SIRT7/DCUN1D3/MAGEA2/ARRDC3/DCUN1D5/ARNT	32
GO:0042254	GO:0042254	ribosome biogenesis	38/1133	303/17320	8.64486e-05	0.0480183	0.045491	RPS5/RRN3/SNU13/MTG2/RPS19/RPS15/NSUN4/RCL1/WDR55/MRM2/MRPS7/METTL16/RPL27/TRAF7/UTP4/ISG20L2/NAF1/ABT1/SRFBP1/MALSU1/RPUSD3/MRPL10/TFB2M/UTP15/DCAF13/RPL10L/TRMT112/RPL35A/RPS27L/SIRT7/MAK16/RPL10A/RPS28/ZNHIT3/BRIX1/KAT2B/NMD3/RIOX2	38
GO:0032434	GO:0032434	regulation of proteasomal ubiquitin-dependent protein catabolic process	21/1133	130/17320	0.000104157	0.0490863	0.0465028	HERPUD1/CHFR/RBX1/STUB1/SGTA/HSPBP1/AKT1/CCAR2/ZER1/RYBP/RCHY1/CAMLG/BAG5/FBXO22/FBXW8/STYX/TAF9/DESI1/UCHL5/CBFA2T3/USP7	21
GO:0022618	GO:0022618	ribonucleoprotein complex assembly	27/1133	190/17320	0.000114281	0.0490863	0.0465028	GEMIN5/RPS5/SNU13/PRMT5/SF3A2/RPS19/EIF3B/SETX/RPS15/SF3B1/SRSF6/MRPS7/LSM4/TRAF7/SCAF11/SNRPG/SNRNP200/POLR2D/NAF1/ABT1/CPSF7/RPL10L/RPS27L/RPS28/ZNHIT3/TAF9/BRIX1	27
GO:0000028	GO:0000028	ribosomal small subunit assembly	7/1133	19/17320	0.000126136	0.0490863	0.0465028	RPS5/RPS19/RPS15/MRPS7/ABT1/RPS27L/RPS28	7
GO:1903363	GO:1903363	negative regulation of cellular protein catabolic process	16/1133	86/17320	0.0001264	0.0490863	0.0465028	GABARAPL2/SGTA/RIC1/RGP1/PSMF1/SCO1/CCAR2/ATP13A2/RYBP/CAMLG/BAG5/STYX/TAF9/SUFU/UCHL5/USP7	16
GO:2000116	GO:2000116	regulation of cysteine-type endopeptidase activity	31/1133	233/17320	0.000129042	0.0490863	0.0465028	CFLAR/FAS/HERPUD1/PDCD2/REST/BAX/MUL1/RFFL/TNFRSF10A/CASP2/CTSD/PRDX5/RAF1/LAMTOR5/KHDC1/KLF4/AKT1/BCL10/ARL6IP5/BCL2L11/SH3RF1/BEX3/SMAD3/USP50/TRIAP1/SFN/ACER2/RPS27L/MAGEA3/PPARG/MICAL1	31
GO:0061136	GO:0061136	regulation of proteasomal protein catabolic process	27/1133	192/17320	0.000136574	0.0490863	0.0465028	GABARAPL2/HERPUD1/CHFR/RBX1/STUB1/SGTA/PSMF1/SCO1/HSPBP1/RNF185/AKT1/CCAR2/ZER1/RYBP/RCHY1/CAMLG/BAG5/FBXO22/UBB/FBXW8/STYX/TAF9/DESI1/UCHL5/CBFA2T3/TMEM259/USP7	27
GO:2001233	GO:2001233	regulation of apoptotic signaling pathway	46/1133	401/17320	0.000145219	0.0492938	0.0466994	CFLAR/TNFRSF12A/FAS/HERPUD1/RRN3/BAX/MUL1/RFFL/SRPX/TNFRSF10A/PPP2R1A/CASP2/HSPB1/TGFBR1/PPIF/TPD52L1/HDAC1/TRAF7/SELENOS/LGALS3/RAF1/AKT1/BCL10/NACC2/TCF7L2/BCL2L11/NR4A2/SH3RF1/CCAR2/MSX1/BAG5/SMAD3/CTNNB1/UBB/TRIAP1/SCG2/PPP1CA/RAD9A/RELA/SFN/ASAH2/SGMS1/PPP3R1/MAGEA3/CHCHD10/TAF9	46
