# Supplementary material
Source: HighWire-hosted journal article supplement (doi:10.1101/rna.079714.123)
Supplement: Supplemental_Table_3_Target_lists.xlsx [file Supplemental_Table_3_Target_lists.xlsx]

## Sheet: Description
Optimized Infra-red photoactivatable ribonucleoside-enhanced crosslinking and immunoprecipitation (IR-PAR-CLIP) protocol identifies novel IGF2BP3-interacting RNAs in colon cancer cells
Aleksandra S Anisimova, G Elif Karagöz
Supplementary Table 2 (Fig. 6)
Lists of IGF2BP3 target genes	Source, conditions
RNase_I_01_0025	HCT116, PAR-CLIP, RNase I, in-lysate 0.1 U/μL, on-bead 0.025 U/μL , this study
RNase_I_005_005	HCT116, PAR-CLIP, RNase I, in-lysate 0.05 U/μL, on-bead 0.05 U/μL, this study
RNase_I_005_0025	HCT116, PAR-CLIP, RNase I, in-lysate 0.05 U/μL, on-bead 0.025 U/μL, this study
RNase_T1_1_1	HCT116, PAR-CLIP, RNase T1, in-lysate 1 U/μL, on-bead 1 U/μL, this study
RNase_T1_025_025	HCT116, PAR-CLIP, RNase T1, in-lysate 0.25 U/μL, on-bead 0.25 U/μL, this study
RNase_I_01_0025_IgG	HCT116, PAR-CLIP, IgG RNase I, in-lysate 0.1 U/μL, on-bead 0.025 U/μL, this study
Hafner et al. 2010	HEK293, PAR-CLIP, Hafner et al. 2010
Conway et al. 2016	hESCs, eCLIP, Conway et al. 2016
Palanichamy et al. 2016, RS4	B-ALL RS4, iCLIP, Palanichamy et al. 2016
Palanichamy et al. 2016, Reh	B-ALL Reh, iCLIP, Palanichamy et al. 2016
Ennajdaoui et al. 2016, PDAC	PL45 and Panc1 PDAC, iCLIP, Ennajdaoui et al. 2016
ENCODE	HepG2, eCLIP, ENCODE project (ENCSR993OLA) Dunham et al. 2012, analyzed in Zhao et al. 2022 (POSTAR3 database).

## Sheet: RNase_I_01_0025
#HCT116, PAR-CLIP, RNase I, in-lysate 0.1 U/μL, on-bead 0.025 U/μL , this study
ENSEMBL	SYMBOL
ENSG00000001084.13	GCLC
ENSG00000001167.14	NFYA
ENSG00000002587.10	HS3ST1
ENSG00000002745.13	WNT16
ENSG00000002834.18	LASP1
ENSG00000003056.8	M6PR
ENSG00000003249.15	DBNDD1
ENSG00000003402.20	CFLAR
ENSG00000003436.16	TFPI
ENSG00000004142.12	POLDIP2
ENSG00000004455.17	AK2
ENSG00000004478.8	FKBP4
ENSG00000004897.12	CDC27
ENSG00000005022.6	SLC25A5
ENSG00000005100.13	DHX33
ENSG00000005187.12	ACSM3
ENSG00000005194.15	CIAPIN1
ENSG00000005339.15	CREBBP
ENSG00000005436.14	GCFC2
ENSG00000005483.21	KMT2E
ENSG00000005812.11	FBXL3
ENSG00000005889.16	ZFX
ENSG00000005893.16	LAMP2
ENSG00000006007.12	GDE1
ENSG00000006016.11	CRLF1
ENSG00000006125.18	AP2B1
ENSG00000006327.14	TNFRSF12A
ENSG00000006432.15	MAP3K9
ENSG00000006451.8	RALA
ENSG00000006468.14	ETV1
ENSG00000006634.8	DBF4
ENSG00000006695.12	COX10
ENSG00000006831.10	ADIPOR2
ENSG00000007168.14	PAFAH1B1
ENSG00000007202.15	KIAA0100
ENSG00000008130.15	NADK
ENSG00000008282.9	SYPL1
ENSG00000008283.16	CYB561
ENSG00000008394.13	MGST1
ENSG00000008952.17	SEC62
ENSG00000008988.11	RPS20
ENSG00000009307.16	CSDE1
ENSG00000009335.18	UBE3C
ENSG00000009413.16	REV3L
ENSG00000009844.16	VTA1
ENSG00000009954.11	BAZ1B
ENSG00000010017.13	RANBP9
ENSG00000010244.19	ZNF207
ENSG00000010270.14	STARD3NL
ENSG00000010404.18	IDS
ENSG00000010932.17	FMO1
ENSG00000011007.12	ELOA
ENSG00000011052.21	NME1-NME2
ENSG00000011114.15	BTBD7
ENSG00000011258.16	MBTD1
ENSG00000011295.16	TTC19
ENSG00000011304.22	PTBP1
ENSG00000012174.12	MBTPS2
ENSG00000012211.13	PRICKLE3
ENSG00000012232.9	EXTL3
ENSG00000012660.14	ELOVL5
ENSG00000012963.15	UBR7
ENSG00000013306.16	SLC25A39
ENSG00000013588.9	GPRC5A
ENSG00000014824.14	SLC30A9
ENSG00000014919.13	COX15
ENSG00000015475.19	BID
ENSG00000015479.20	MATR3
ENSG00000015676.18	NUDCD3
ENSG00000017797.13	RALBP1
ENSG00000018408.15	WWTR1
ENSG00000019186.10	CYP24A1
ENSG00000023041.11	ZDHHC6
ENSG00000023191.17	RNH1
ENSG00000023516.9	AKAP11
ENSG00000023572.10	GLRX2
ENSG00000023734.11	STRAP
ENSG00000023909.10	GCLM
ENSG00000024422.12	EHD2
ENSG00000025800.14	KPNA6
ENSG00000026103.22	FAS
ENSG00000026508.20	CD44
ENSG00000027697.15	IFNGR1
ENSG00000029363.17	BCLAF1
ENSG00000029364.12	SLC39A9
ENSG00000031003.10	FAM13B
ENSG00000031691.7	CENPQ
ENSG00000031698.13	SARS1
ENSG00000032742.18	IFT88
ENSG00000033050.9	ABCF2
ENSG00000033800.14	PIAS1
ENSG00000034713.8	GABARAPL2
ENSG00000035403.18	VCL
ENSG00000035862.12	TIMP2
ENSG00000036549.13	ZZZ3
ENSG00000037749.12	MFAP3
ENSG00000038219.13	BOD1L1
ENSG00000038274.17	MAT2B
ENSG00000038427.16	VCAN
ENSG00000039523.20	RIPOR1
ENSG00000039650.12	PNKP
ENSG00000041357.16	PSMA4
ENSG00000043093.15	DCUN1D1
ENSG00000044115.21	CTNNA1
ENSG00000044574.8	HSPA5
ENSG00000046604.13	DSG2
ENSG00000047849.21	MAP4
ENSG00000047932.14	GOPC
ENSG00000048392.12	RRM2B
ENSG00000048405.10	ZNF800
ENSG00000048544.6	MRPS10
ENSG00000048828.17	FAM120A
ENSG00000048991.16	R3HDM1
ENSG00000049130.16	KITLG
ENSG00000049245.13	VAMP3
ENSG00000049449.10	RCN1
ENSG00000049618.24	ARID1B
ENSG00000049656.14	CLPTM1L
ENSG00000050130.18	JKAMP
ENSG00000050393.11	MCUR1
ENSG00000050426.16	LETMD1
ENSG00000051825.15	MPHOSPH9
ENSG00000052723.12	SIKE1
ENSG00000053254.16	FOXN3
ENSG00000053770.12	AP5M1
ENSG00000054116.12	TRAPPC3
ENSG00000054118.15	THRAP3
ENSG00000054598.9	FOXC1
ENSG00000054690.14	PLEKHH1
ENSG00000054965.11	FAM168A
ENSG00000055070.17	SZRD1
ENSG00000055130.17	CUL1
ENSG00000055163.20	CYFIP2
ENSG00000055208.19	TAB2
ENSG00000055332.18	EIF2AK2
ENSG00000055609.19	KMT2C
ENSG00000055917.16	PUM2
ENSG00000056097.16	ZFR
ENSG00000056277.16	ZNF280C
ENSG00000056586.16	RC3H2
ENSG00000057019.16	DCBLD2
ENSG00000057608.17	GDI2
ENSG00000057663.16	ATG5
ENSG00000058262.10	SEC61A1
ENSG00000058272.19	PPP1R12A
ENSG00000058673.17	ZC3H11A
ENSG00000058804.12	NDC1
ENSG00000059122.17	FLYWCH1
ENSG00000059728.11	MXD1
ENSG00000059758.8	CDK17
ENSG00000059769.20	DNAJC25
ENSG00000060138.13	YBX3
ENSG00000060237.18	WNK1
ENSG00000060339.14	CCAR1
ENSG00000060749.16	QSER1
ENSG00000061676.15	NCKAP1
ENSG00000061794.13	MRPS35
ENSG00000062194.16	GPBP1
ENSG00000062485.19	CS
ENSG00000062716.13	VMP1
ENSG00000063046.18	EIF4B
ENSG00000063177.13	RPL18
ENSG00000063244.13	U2AF2
ENSG00000063322.15	MED29
ENSG00000063587.15	ZNF275
ENSG00000063601.17	MTMR1
ENSG00000063660.9	GPC1
ENSG00000063978.16	RNF4
ENSG00000064115.11	TM7SF3
ENSG00000064225.12	ST3GAL6
ENSG00000064313.12	TAF2
ENSG00000064393.16	HIPK2
ENSG00000064419.13	TNPO3
ENSG00000064666.15	CNN2
ENSG00000064726.10	BTBD1
ENSG00000065000.19	AP3D1
ENSG00000065060.17	UHRF1BP1
ENSG00000065135.12	GNAI3
ENSG00000065150.21	IPO5
ENSG00000065308.5	TRAM2
ENSG00000065427.15	KARS1
ENSG00000065526.12	SPEN
ENSG00000065548.18	ZC3H15
ENSG00000065559.15	MAP2K4
ENSG00000065621.15	GSTO2
ENSG00000065665.21	SEC61A2
ENSG00000065911.13	MTHFD2
ENSG00000065970.9	FOXJ2
ENSG00000066027.12	PPP2R5A
ENSG00000066032.18	CTNNA2
ENSG00000066044.15	ELAVL1
ENSG00000066117.15	SMARCD1
ENSG00000066136.20	NFYC
ENSG00000066322.15	ELOVL1
ENSG00000066427.24	ATXN3
ENSG00000066583.12	ISOC1
ENSG00000066654.14	THUMPD1
ENSG00000066855.16	MTFR1
ENSG00000067082.15	KLF6
ENSG00000067167.8	TRAM1
ENSG00000067177.15	PHKA1
ENSG00000067182.8	TNFRSF1A
ENSG00000067225.18	PKM
ENSG00000067369.14	TP53BP1
ENSG00000067533.6	RRP15
ENSG00000067560.13	RHOA
ENSG00000067715.14	SYT1
ENSG00000067955.15	CBFB
ENSG00000068305.17	MEF2A
ENSG00000068489.13	PRR11
ENSG00000068650.18	ATP11A
ENSG00000068654.16	POLR1A
ENSG00000068697.7	LAPTM4A
ENSG00000068796.19	KIF2A
ENSG00000068878.15	PSME4
ENSG00000069275.13	NUCKS1
ENSG00000069329.18	VPS35
ENSG00000069345.12	DNAJA2
ENSG00000069849.11	ATP1B3
ENSG00000069956.12	MAPK6
ENSG00000070087.14	PFN2
ENSG00000070159.14	PTPN3
ENSG00000070214.16	SLC44A1
ENSG00000070367.16	EXOC5
ENSG00000070614.15	NDST1
ENSG00000070756.17	PABPC1
ENSG00000070761.8	CFAP20
ENSG00000070770.10	CSNK2A2
ENSG00000070831.17	CDC42
ENSG00000070882.13	OSBPL3
ENSG00000071054.16	MAP4K4
ENSG00000071082.11	RPL31
ENSG00000071127.17	WDR1
ENSG00000071243.16	ING3
ENSG00000071537.14	SEL1L
ENSG00000071564.17	TCF3
ENSG00000071626.17	DAZAP1
ENSG00000071994.11	PDCD2
ENSG00000072042.13	RDH11
ENSG00000072071.16	ADGRL1
ENSG00000072110.15	ACTN1
ENSG00000072121.17	ZFYVE26
ENSG00000072210.19	ALDH3A2
ENSG00000072274.13	TFRC
ENSG00000072310.17	SREBF1
ENSG00000072364.13	AFF4
ENSG00000072401.15	UBE2D1
ENSG00000072415.10	MPP5
ENSG00000072501.19	SMC1A
ENSG00000072571.20	HMMR
ENSG00000072609.18	CHFR
ENSG00000072736.19	NFATC3
ENSG00000072803.17	FBXW11
ENSG00000072864.16	NDE1
ENSG00000073008.15	PVR
ENSG00000073584.20	SMARCE1
ENSG00000073792.16	IGF2BP2
ENSG00000073803.14	MAP3K13
ENSG00000073969.18	NSF
ENSG00000074201.9	CLNS1A
ENSG00000074211.14	PPP2R2C
ENSG00000074319.13	TSG101
ENSG00000074356.17	NCBP3
ENSG00000074695.6	LMAN1
ENSG00000074696.13	HACD3
ENSG00000074800.16	ENO1
ENSG00000075407.18	ZNF37A
ENSG00000075415.13	SLC25A3
ENSG00000075568.17	TMEM131
ENSG00000075618.18	FSCN1
ENSG00000075624.17	ACTB
ENSG00000075785.14	RAB7A
ENSG00000075975.17	MKRN2
ENSG00000076053.12	RBM7
ENSG00000076067.13	RBMS2
ENSG00000076108.12	BAZ2A
ENSG00000076201.15	PTPN23
ENSG00000076554.15	TPD52
ENSG00000077147.16	TM9SF3
ENSG00000077549.19	CAPZB
ENSG00000077585.14	GPR137B
ENSG00000077721.16	UBE2A
ENSG00000078043.16	PIAS2
ENSG00000078124.12	ACER3
ENSG00000078140.14	UBE2K
ENSG00000078237.7	TIGAR
ENSG00000078246.17	TULP3
ENSG00000078304.19	PPP2R5C
ENSG00000078369.18	GNB1
ENSG00000078399.19	HOXA9
ENSG00000078403.17	MLLT10
ENSG00000078668.14	VDAC3
ENSG00000078747.16	ITCH
ENSG00000078795.17	PKD2L2
ENSG00000079246.16	XRCC5
ENSG00000079313.15	REXO1
ENSG00000079332.15	SAR1A
ENSG00000079387.14	SENP1
ENSG00000079482.13	OPHN1
ENSG00000080345.18	RIF1
ENSG00000080371.6	RAB21
ENSG00000080546.13	SESN1
ENSG00000080603.17	SRCAP
ENSG00000080802.19	CNOT4
ENSG00000080815.19	PSEN1
ENSG00000080819.9	CPOX
ENSG00000080822.17	CLDND1
ENSG00000080824.19	HSP90AA1
ENSG00000081026.19	MAGI3
ENSG00000081154.12	PCNP
ENSG00000081181.8	ARG2
ENSG00000082153.18	BZW1
ENSG00000082213.18	C5orf22
ENSG00000082258.13	CCNT2
ENSG00000082269.17	FAM135A
ENSG00000082641.16	NFE2L1
ENSG00000082701.17	GSK3B
ENSG00000082898.18	XPO1
ENSG00000082996.20	RNF13
ENSG00000083168.11	KAT6A
ENSG00000083312.17	TNPO1
ENSG00000083520.15	DIS3
ENSG00000083844.10	ZNF264
ENSG00000083845.9	RPS5
ENSG00000083857.14	FAT1
ENSG00000083896.13	YTHDC1
ENSG00000083937.10	CHMP2B
ENSG00000084073.10	ZMPSTE24
ENSG00000084090.13	STARD7
ENSG00000084093.19	REST
ENSG00000084112.15	SSH1
ENSG00000084234.18	APLP2
ENSG00000084463.8	WBP11
ENSG00000084652.16	TXLNA
ENSG00000084693.16	AGBL5
ENSG00000084733.11	RAB10
ENSG00000085063.17	CD59
ENSG00000085231.14	AK6
ENSG00000085276.19	MECOM
ENSG00000085365.18	SCAMP1
ENSG00000085415.16	SEH1L
ENSG00000085433.16	WDR47
ENSG00000085449.15	WDFY1
ENSG00000085719.13	CPNE3
ENSG00000085721.13	RRN3
ENSG00000085733.16	CTTN
ENSG00000085788.14	DDHD2
ENSG00000085872.15	CHERP
ENSG00000086061.16	DNAJA1
ENSG00000086062.13	B4GALT1
ENSG00000086065.14	CHMP5
ENSG00000086189.10	DIMT1
ENSG00000086232.13	EIF2AK1
ENSG00000086289.12	EPDR1
ENSG00000086300.16	SNX10
ENSG00000086475.15	SEPHS1
ENSG00000086589.12	RBM22
ENSG00000086598.11	TMED2
ENSG00000086666.19	ZFAND6
ENSG00000086712.13	TXLNG
ENSG00000086758.16	HUWE1
ENSG00000087053.20	MTMR2
ENSG00000087077.14	TRIP6
ENSG00000087086.15	FTL
ENSG00000087088.20	BAX
ENSG00000087111.21	PIGS
ENSG00000087263.17	OGFOD1
ENSG00000087274.17	ADD1
ENSG00000087302.9	RTRAF
ENSG00000087365.16	SF3B2
ENSG00000087448.11	KLHL42
ENSG00000087995.16	METTL2A
ENSG00000088247.17	KHSRP
ENSG00000088256.9	GNA11
ENSG00000088325.16	TPX2
ENSG00000088387.19	DOCK9
ENSG00000088448.14	ANKRD10
ENSG00000088682.14	COQ9
ENSG00000088808.18	PPP1R13B
ENSG00000088832.18	FKBP1A
ENSG00000088888.18	MAVS
ENSG00000088930.8	XRN2
ENSG00000088986.11	DYNLL1
ENSG00000089006.17	SNX5
ENSG00000089009.15	RPL6
ENSG00000089063.15	TMEM230
ENSG00000089094.19	KDM2B
ENSG00000089157.16	RPLP0
ENSG00000089159.16	PXN
ENSG00000089234.16	BRAP
ENSG00000089597.18	GANAB
ENSG00000089685.15	BIRC5
ENSG00000089693.11	MLF2
ENSG00000089737.17	DDX24
ENSG00000089818.18	NECAP1
ENSG00000089876.12	DHX32
ENSG00000089902.10	RCOR1
ENSG00000090054.15	SPTLC1
ENSG00000090060.18	PAPOLA
ENSG00000090061.17	CCNK
ENSG00000090097.22	PCBP4
ENSG00000090266.13	NDUFB2
ENSG00000090316.16	MAEA
ENSG00000090372.15	STRN4
ENSG00000090487.11	SPG21
ENSG00000090612.22	ZNF268
ENSG00000090615.15	GOLGA3
ENSG00000090621.15	PABPC4
ENSG00000090776.6	EFNB1
ENSG00000090857.14	PDPR
ENSG00000090863.12	GLG1
ENSG00000090905.19	TNRC6A
ENSG00000091009.8	RBM27
ENSG00000091039.17	OSBPL8
ENSG00000091140.14	DLD
ENSG00000091164.13	TXNL1
ENSG00000091317.8	CMTM6
ENSG00000091409.15	ITGA6
ENSG00000091527.16	CDV3
ENSG00000091542.9	ALKBH5
ENSG00000091656.19	ZFHX4
ENSG00000092140.16	G2E3
ENSG00000092148.13	HECTD1
ENSG00000092199.18	HNRNPC
ENSG00000092201.10	SUPT16H
ENSG00000092203.15	TOX4
ENSG00000092531.10	SNAP23
ENSG00000092820.18	EZR
ENSG00000092853.14	CLSPN
ENSG00000092871.17	RFFL
ENSG00000093000.19	NUP50
ENSG00000093010.15	COMT
ENSG00000093144.19	ECHDC1
ENSG00000093167.18	LRRFIP2
ENSG00000093183.14	SEC22C
ENSG00000094916.16	CBX5
ENSG00000095139.14	ARCN1
ENSG00000095261.14	PSMD5
ENSG00000095574.12	IKZF5
ENSG00000095787.23	WAC
ENSG00000096060.15	FKBP5
ENSG00000096063.16	SRPK1
ENSG00000096093.16	EFHC1
ENSG00000096384.20	HSP90AB1
ENSG00000096696.14	DSP
ENSG00000097007.19	ABL1
ENSG00000097021.20	ACOT7
ENSG00000097033.14	SH3GLB1
ENSG00000099194.6	SCD
ENSG00000099204.20	ABLIM1
ENSG00000099219.14	ERMP1
ENSG00000099246.17	RAB18
ENSG00000099341.11	PSMD8
ENSG00000099381.18	SETD1A
ENSG00000099399.6	MAGEB2
ENSG00000099622.14	CIRBP
ENSG00000099810.21	MTAP
ENSG00000099817.12	POLR2E
ENSG00000099875.15	MKNK2
ENSG00000099940.12	SNAP29
ENSG00000099942.13	CRKL
ENSG00000099995.19	SF3A1
ENSG00000100028.12	SNRPD3
ENSG00000100030.15	MAPK1
ENSG00000100075.10	SLC25A1
ENSG00000100129.18	EIF3L
ENSG00000100138.15	SNU13
ENSG00000100147.14	CCDC134
ENSG00000100201.23	DDX17
ENSG00000100216.6	TOMM22
ENSG00000100219.16	XBP1
ENSG00000100221.10	JOSD1
ENSG00000100225.18	FBXO7
ENSG00000100227.18	POLDIP3
ENSG00000100243.21	CYB5R3
ENSG00000100266.19	PACSIN2
ENSG00000100281.14	HMGXB4
ENSG00000100304.13	TTLL12
ENSG00000100320.23	RBFOX2
ENSG00000100335.15	MIEF1
ENSG00000100345.22	MYH9
ENSG00000100354.21	TNRC6B
ENSG00000100380.14	ST13
ENSG00000100393.14	EP300
ENSG00000100410.8	PHF5A
ENSG00000100412.17	ACO2
ENSG00000100413.17	POLR3H
ENSG00000100439.10	ABHD4
ENSG00000100441.10	KHNYN
ENSG00000100445.17	SDR39U1
ENSG00000100461.18	RBM23
ENSG00000100462.16	PRMT5
ENSG00000100473.18	COCH
ENSG00000100478.15	AP4S1
ENSG00000100522.10	GNPNAT1
ENSG00000100523.16	DDHD1
ENSG00000100528.12	CNIH1
ENSG00000100554.12	ATP6V1D
ENSG00000100558.9	PLEK2
ENSG00000100564.9	PIGH
ENSG00000100568.11	VTI1B
ENSG00000100580.8	TMED8
ENSG00000100591.8	AHSA1
ENSG00000100596.7	SPTLC2
ENSG00000100614.18	PPM1A
ENSG00000100625.9	SIX4
ENSG00000100632.11	ERH
ENSG00000100644.17	HIF1A
ENSG00000100647.8	SUSD6
ENSG00000100664.11	EIF5
ENSG00000100711.14	ZFYVE21
ENSG00000100731.16	PCNX1
ENSG00000100744.15	GSKIP
ENSG00000100796.17	PPP4R3A
ENSG00000100804.19	PSMB5
ENSG00000100811.14	YY1
ENSG00000100814.18	CCNB1IP1
ENSG00000100815.12	TRIP11
ENSG00000100823.12	APEX1
ENSG00000100852.13	ARHGAP5
ENSG00000100902.11	PSMA6
ENSG00000100941.9	PNN
ENSG00000101003.10	GINS1
ENSG00000101079.21	NDRG3
ENSG00000101082.14	SLA2
ENSG00000101084.18	RAB5IF
ENSG00000101109.12	STK4
ENSG00000101126.18	ADNP
ENSG00000101138.12	CSTF1
ENSG00000101150.18	TPD52L2
ENSG00000101152.11	DNAJC5
ENSG00000101158.15	NELFCD
ENSG00000101166.16	PRELID3B
ENSG00000101182.15	PSMA7
ENSG00000101188.5	NTSR1
ENSG00000101191.17	DIDO1
ENSG00000101193.8	GID8
ENSG00000101255.11	TRIB3
ENSG00000101266.19	CSNK2A1
ENSG00000101290.14	CDS2
ENSG00000101311.16	FERMT1
ENSG00000101337.16	TM9SF4
ENSG00000101343.15	CRNKL1
ENSG00000101346.14	POFUT1
ENSG00000101350.8	KIF3B
ENSG00000101361.17	NOP56
ENSG00000101363.12	MANBAL
ENSG00000101367.9	MAPRE1
ENSG00000101413.12	RPRD1B
ENSG00000101421.4	CHMP4B
ENSG00000101440.9	ASIP
ENSG00000101444.13	AHCY
ENSG00000101447.15	FAM83D
ENSG00000101474.12	APMAP
ENSG00000101544.9	ADNP2
ENSG00000101557.15	USP14
ENSG00000101558.14	VAPA
ENSG00000101608.13	MYL12A
ENSG00000101654.18	RNMT
ENSG00000101843.19	PSMD10
ENSG00000101856.10	PGRMC1
ENSG00000101871.16	MID1
ENSG00000101888.12	NXT2
ENSG00000101911.13	PRPS2
ENSG00000101928.13	MOSPD1
ENSG00000101935.10	AMMECR1
ENSG00000101966.13	XIAP
ENSG00000101972.19	STAG2
ENSG00000102007.11	PLP2
ENSG00000102034.17	ELF4
ENSG00000102054.18	RBBP7
ENSG00000102100.16	SLC35A2
ENSG00000102144.15	PGK1
ENSG00000102158.20	MAGT1
ENSG00000102225.16	CDK16
ENSG00000102290.22	PCDH11X
ENSG00000102309.15	PIN4
ENSG00000102317.18	RBM3
ENSG00000102393.14	GLA
ENSG00000102471.14	NDFIP2
ENSG00000102531.16	FNDC3A
ENSG00000102554.14	KLF5
ENSG00000102572.15	STK24
ENSG00000102580.15	DNAJC3
ENSG00000102606.18	ARHGEF7
ENSG00000102699.6	PARP4
ENSG00000102743.15	SLC25A15
ENSG00000102753.10	KPNA3
ENSG00000102804.15	TSC22D1
ENSG00000102805.16	CLN5
ENSG00000102858.13	MGRN1
ENSG00000102870.6	ZNF629
ENSG00000102898.12	NUTF2
ENSG00000102908.22	NFAT5
ENSG00000102910.14	LONP2
ENSG00000102931.8	ARL2BP
ENSG00000102934.10	PLLP
ENSG00000102974.16	CTCF
ENSG00000102978.13	POLR2C
ENSG00000103005.12	USB1
ENSG00000103018.17	CYB5B
ENSG00000103035.11	PSMD7
ENSG00000103037.12	SETD6
ENSG00000103044.11	HAS3
ENSG00000103061.13	SLC7A6OS
ENSG00000103064.15	SLC7A6
ENSG00000103160.12	HSDL1
ENSG00000103187.8	COTL1
ENSG00000103194.16	USP10
ENSG00000103202.13	NME4
ENSG00000103257.9	SLC7A5
ENSG00000103266.11	STUB1
ENSG00000103275.21	UBE2I
ENSG00000103335.22	PIEZO1
ENSG00000103342.13	GSPT1
ENSG00000103353.16	UBFD1
ENSG00000103356.18	EARS2
ENSG00000103365.15	GGA2
ENSG00000103404.14	USP31
ENSG00000103423.14	DNAJA3
ENSG00000103502.14	CDIPT
ENSG00000103642.12	LACTB
ENSG00000103740.10	ACSBG1
ENSG00000103769.10	RAB11A
ENSG00000103855.18	CD276
ENSG00000103966.11	EHD4
ENSG00000104067.17	TJP1
ENSG00000104131.13	EIF3J
ENSG00000104133.15	SPG11
ENSG00000104164.12	BLOC1S6
ENSG00000104219.13	ZDHHC2
ENSG00000104231.11	ZFAND1
ENSG00000104320.14	NBN
ENSG00000104331.9	BPNT2
ENSG00000104341.17	LAPTM4B
ENSG00000104343.21	UBE2W
ENSG00000104388.15	RAB2A
ENSG00000104408.11	EIF3E
ENSG00000104419.17	NDRG1
ENSG00000104442.10	ARMC1
ENSG00000104472.10	CHRAC1
ENSG00000104635.15	SLC39A14
ENSG00000104660.19	LEPROTL1
ENSG00000104687.14	GSR
ENSG00000104689.10	TNFRSF10A
ENSG00000104695.13	PPP2CB
ENSG00000104738.18	MCM4
ENSG00000104756.16	KCTD9
ENSG00000104763.20	ASAH1
ENSG00000104812.15	GYS1
ENSG00000104824.17	HNRNPL
ENSG00000104853.16	CLPTM1
ENSG00000104904.12	OAZ1
ENSG00000104951.16	IL4I1
ENSG00000104964.15	TLE5
ENSG00000104969.11	SGTA
ENSG00000104979.9	C19orf53
ENSG00000105011.9	ASF1B
ENSG00000105058.12	FAM32A
ENSG00000105072.9	C19orf44
ENSG00000105176.18	URI1
ENSG00000105186.16	ANKRD27
ENSG00000105193.9	RPS16
ENSG00000105220.17	GPI
ENSG00000105245.9	NUMBL
ENSG00000105281.12	SLC1A5
ENSG00000105323.17	HNRNPUL1
ENSG00000105329.11	TGFB1
ENSG00000105341.19	DMAC2
ENSG00000105355.9	PLIN3
ENSG00000105401.9	CDC37
ENSG00000105438.9	KDELR1
ENSG00000105552.15	BCAT2
ENSG00000105568.18	PPP2R1A
ENSG00000105583.11	WDR83OS
ENSG00000105640.13	RPL18A
ENSG00000105647.19	PIK3R2
ENSG00000105700.11	KXD1
ENSG00000105723.13	GSK3A
ENSG00000105778.19	AVL9
ENSG00000105793.16	GTPBP10
ENSG00000105810.10	CDK6
ENSG00000105835.12	NAMPT
ENSG00000105849.6	POLR1F
ENSG00000105856.14	HBP1
ENSG00000105877.18	DNAH11
ENSG00000105879.12	CBLL1
ENSG00000105887.11	MTPN
ENSG00000105889.16	STEAP1B
ENSG00000105939.13	ZC3HAV1
ENSG00000105968.19	H2AZ2
ENSG00000105971.15	CAV2
ENSG00000105974.13	CAV1
ENSG00000105976.16	MET
ENSG00000105983.22	LMBR1
ENSG00000105993.15	DNAJB6
ENSG00000106080.11	FKBP14
ENSG00000106144.20	CASP2
ENSG00000106211.10	HSPB1
ENSG00000106244.13	PDAP1
ENSG00000106246.18	PTCD1
ENSG00000106261.17	ZKSCAN1
ENSG00000106263.18	EIF3B
ENSG00000106290.15	TAF6
ENSG00000106299.8	WASL
ENSG00000106344.8	RBM28
ENSG00000106348.18	IMPDH1
ENSG00000106484.16	MEST
ENSG00000106546.14	AHR
ENSG00000106554.13	CHCHD3
ENSG00000106588.12	PSMA2
ENSG00000106603.19	COA1
ENSG00000106609.16	TMEM248
ENSG00000106615.10	RHEB
ENSG00000106635.8	BCL7B
ENSG00000106636.9	YKT6
ENSG00000106682.15	EIF4H
ENSG00000106683.15	LIMK1
ENSG00000106723.17	SPIN1
ENSG00000106771.13	TMEM245
ENSG00000106785.15	TRIM14
ENSG00000106799.13	TGFBR1
ENSG00000107036.12	RIC1
ENSG00000107130.10	NCS1
ENSG00000107164.16	FUBP3
ENSG00000107185.10	RGP1
ENSG00000107262.26	BAG1
ENSG00000107290.14	SETX
ENSG00000107341.5	UBE2R2
ENSG00000107372.13	ZFAND5
ENSG00000107443.16	CCNJ
ENSG00000107554.17	DNMBP
ENSG00000107566.14	ERLIN1
ENSG00000107581.13	EIF3A
ENSG00000107651.13	SEC23IP
ENSG00000107669.18	ATE1
ENSG00000107679.14	PLEKHA1
ENSG00000107771.17	CCSER2
ENSG00000107816.17	LZTS2
ENSG00000107854.6	TNKS2
ENSG00000107862.6	GBF1
ENSG00000107863.18	ARHGAP21
ENSG00000107897.20	ACBD5
ENSG00000107929.15	LARP4B
ENSG00000107937.19	GTPBP4
ENSG00000107949.17	BCCIP
ENSG00000107951.15	MTPAP
ENSG00000107984.10	DKK1
ENSG00000108021.20	TASOR2
ENSG00000108061.12	SHOC2
ENSG00000108064.11	TFAM
ENSG00000108091.11	CCDC6
ENSG00000108100.18	CCNY
ENSG00000108107.15	RPL28
ENSG00000108175.17	ZMIZ1
ENSG00000108179.14	PPIF
ENSG00000108219.15	TSPAN14
ENSG00000108256.9	NUFIP2
ENSG00000108349.17	CASC3
ENSG00000108384.15	RAD51C
ENSG00000108389.9	MTMR4
ENSG00000108406.10	DHX40
ENSG00000108424.11	KPNB1
ENSG00000108439.11	PNPO
ENSG00000108443.14	RPS6KB1
ENSG00000108468.15	CBX1
ENSG00000108510.10	MED13
ENSG00000108518.8	PFN1
ENSG00000108523.16	RNF167
ENSG00000108561.8	C1QBP
ENSG00000108578.15	BLMH
ENSG00000108582.12	CPD
ENSG00000108587.16	GOSR1
ENSG00000108588.14	CCDC47
ENSG00000108599.15	AKAP10
ENSG00000108639.8	SYNGR2
ENSG00000108654.16	DDX5
ENSG00000108671.11	PSMD11
ENSG00000108679.13	LGALS3BP
ENSG00000108774.15	RAB5C
ENSG00000108788.12	MLX
ENSG00000108819.11	PPP1R9B
ENSG00000108829.10	LRRC59
ENSG00000108854.16	SMURF2
ENSG00000108946.15	PRKAR1A
ENSG00000108953.17	YWHAE
ENSG00000109079.10	TNFAIP1
ENSG00000109084.14	TMEM97
ENSG00000109099.16	PMP22
ENSG00000109133.13	TMEM33
ENSG00000109171.15	SLAIN2
ENSG00000109180.15	OCIAD1
ENSG00000109189.13	USP46
ENSG00000109270.13	LAMTOR3
ENSG00000109320.13	NFKB1
ENSG00000109321.11	AREG
ENSG00000109332.20	UBE2D3
ENSG00000109381.20	ELF2
ENSG00000109390.13	NDUFC1
ENSG00000109519.13	GRPEL1
ENSG00000109572.14	CLCN3
ENSG00000109586.12	GALNT7
ENSG00000109606.13	DHX15
ENSG00000109654.16	TRIM2
ENSG00000109670.16	FBXW7
ENSG00000109685.19	NSD2
ENSG00000109686.19	SH3D19
ENSG00000109689.18	STIM2
ENSG00000109787.13	KLF3
ENSG00000109814.12	UGDH
ENSG00000109854.14	HTATIP2
ENSG00000109929.10	SC5D
ENSG00000109971.14	HSPA8
ENSG00000110013.13	SIAE
ENSG00000110048.12	OSBP
ENSG00000110075.15	PPP6R3
ENSG00000110092.4	CCND1
ENSG00000110104.13	CCDC86
ENSG00000110107.9	PRPF19
ENSG00000110108.10	TMEM109
ENSG00000110172.12	CHORDC1
ENSG00000110218.9	PANX1
ENSG00000110315.7	RNF141
ENSG00000110321.19	EIF4G2
ENSG00000110328.6	GALNT18
ENSG00000110344.10	UBE4A
ENSG00000110367.13	DDX6
ENSG00000110395.7	CBL
ENSG00000110400.11	NECTIN1
ENSG00000110422.12	HIPK3
ENSG00000110651.12	CD81
ENSG00000110660.15	SLC35F2
ENSG00000110696.10	C11orf58
ENSG00000110700.7	RPS13
ENSG00000110713.17	NUP98
ENSG00000110851.12	PRDM4
ENSG00000110880.11	CORO1C
ENSG00000110906.13	KCTD10
ENSG00000110917.8	MLEC
ENSG00000110925.7	CSRNP2
ENSG00000110955.9	ATP5F1B
ENSG00000110958.16	PTGES3
ENSG00000111011.18	RSRC2
ENSG00000111142.14	METAP2
ENSG00000111145.8	ELK3
ENSG00000111186.13	WNT5B
ENSG00000111203.13	ITFG2
ENSG00000111206.13	FOXM1
ENSG00000111247.15	RAD51AP1
ENSG00000111252.11	SH2B3
ENSG00000111269.3	CREBL2
ENSG00000111319.13	SCNN1A
ENSG00000111328.7	CDK2AP1
ENSG00000111371.16	SLC38A1
ENSG00000111412.6	SPRING1
ENSG00000111450.14	STX2
ENSG00000111481.10	COPZ1
ENSG00000111530.13	CAND1
ENSG00000111540.16	RAB5B
ENSG00000111605.18	CPSF6
ENSG00000111615.14	KRR1
ENSG00000111640.15	GAPDH
ENSG00000111652.10	COPS7A
ENSG00000111669.15	TPI1
ENSG00000111670.16	GNPTAB
ENSG00000111676.15	ATN1
ENSG00000111684.11	LPCAT3
ENSG00000111711.10	GOLT1B
ENSG00000111716.14	LDHB
ENSG00000111725.11	PRKAB1
ENSG00000111737.12	RAB35
ENSG00000111752.11	PHC1
ENSG00000111775.3	COX6A1
ENSG00000111780.8	AL021546.1
ENSG00000111786.9	SRSF9
ENSG00000111817.19	DSE
ENSG00000111885.7	MAN1A1
ENSG00000111897.7	SERINC1
ENSG00000111906.18	HDDC2
ENSG00000111907.21	TPD52L1
ENSG00000111913.20	RIPOR2
ENSG00000111981.5	ULBP1
ENSG00000112029.10	FBXO5
ENSG00000112031.16	MTRF1L
ENSG00000112062.11	MAPK14
ENSG00000112078.14	KCTD20
ENSG00000112081.17	SRSF3
ENSG00000112096.19	SOD2
ENSG00000112110.10	MRPL18
ENSG00000112118.20	MCM3
ENSG00000112159.12	MDN1
ENSG00000112200.17	ZNF451
ENSG00000112208.11	BAG2
ENSG00000112242.15	E2F3
ENSG00000112245.12	PTP4A1
ENSG00000112249.14	ASCC3
ENSG00000112290.13	WASF1
ENSG00000112306.8	RPS12
ENSG00000112308.13	C6orf62
ENSG00000112312.10	GMNN
ENSG00000112335.15	SNX3
ENSG00000112378.12	PERP
ENSG00000112419.14	PHACTR2
ENSG00000112531.17	QKI
ENSG00000112624.12	BICRAL
ENSG00000112640.16	PPP2R5D
ENSG00000112658.8	SRF
ENSG00000112695.11	COX7A2
ENSG00000112697.17	TMEM30A
ENSG00000112715.25	VEGFA
ENSG00000112787.13	FBRSL1
ENSG00000112996.11	MRPS30
ENSG00000113013.16	HSPA9
ENSG00000113048.17	MRPS27
ENSG00000113068.10	PFDN1
ENSG00000113163.18	CERT1
ENSG00000113194.13	FAF2
ENSG00000113269.14	RNF130
ENSG00000113300.13	CNOT6
ENSG00000113328.19	CCNG1
ENSG00000113356.13	POLR3G
ENSG00000113369.9	ARRDC3
ENSG00000113384.14	GOLPH3
ENSG00000113387.12	SUB1
ENSG00000113441.16	LNPEP
ENSG00000113552.16	GNPDA1
ENSG00000113558.19	SKP1
ENSG00000113569.16	NUP155
ENSG00000113575.10	PPP2CA
ENSG00000113583.8	C5orf15
ENSG00000113648.16	MACROH2A1
ENSG00000113649.11	TCERG1
ENSG00000113658.18	SMAD5
ENSG00000113712.19	CSNK1A1
ENSG00000113719.16	ERGIC1
ENSG00000113732.9	ATP6V0E1
ENSG00000113739.10	STC2
ENSG00000114030.13	KPNA1
ENSG00000114054.14	PCCB
ENSG00000114062.22	UBE3A
ENSG00000114120.14	SLC25A36
ENSG00000114125.14	RNF7
ENSG00000114126.18	TFDP2
ENSG00000114302.16	PRKAR2A
ENSG00000114353.17	GNAI2
ENSG00000114354.15	TFG
ENSG00000114416.18	FXR1
ENSG00000114439.19	BBX
ENSG00000114473.14	IQCG
ENSG00000114503.11	NCBP2
ENSG00000114573.10	ATP6V1A
ENSG00000114686.9	MRPL3
ENSG00000114739.14	ACVR2B
ENSG00000114779.19	ABHD14B
ENSG00000114784.4	EIF1B
ENSG00000114850.7	SSR3
ENSG00000114857.18	NKTR
ENSG00000114867.22	EIF4G1
ENSG00000114902.14	SPCS1
ENSG00000114933.16	INO80D
ENSG00000114978.18	MOB1A
ENSG00000114982.19	KANSL3
ENSG00000114999.8	TTL
ENSG00000115053.17	NCL
ENSG00000115091.12	ACTR3
ENSG00000115109.14	EPB41L5
ENSG00000115159.16	GPD2
ENSG00000115163.15	CENPA
ENSG00000115183.15	TANC1
ENSG00000115204.15	MPV17
ENSG00000115207.13	GTF3C2
ENSG00000115233.12	PSMD14
ENSG00000115239.24	ASB3
ENSG00000115310.18	RTN4
ENSG00000115364.14	MRPL19
ENSG00000115365.12	LANCL1
ENSG00000115415.20	STAT1
ENSG00000115464.15	USP34
ENSG00000115514.12	TXNDC9
ENSG00000115520.8	COQ10B
ENSG00000115540.15	MOB4
ENSG00000115541.11	HSPE1
ENSG00000115561.16	CHMP3
ENSG00000115568.16	ZNF142
ENSG00000115641.19	FHL2
ENSG00000115677.17	HDLBP
ENSG00000115738.10	ID2
ENSG00000115758.13	ODC1
ENSG00000115760.14	BIRC6
ENSG00000115762.16	PLEKHB2
ENSG00000115806.13	GORASP2
ENSG00000115816.15	CEBPZ
ENSG00000115841.21	RMDN2
ENSG00000115875.19	SRSF7
ENSG00000115884.11	SDC1
ENSG00000115946.8	PNO1
ENSG00000115947.14	ORC4
ENSG00000115966.17	ATF2
ENSG00000116005.12	PCYOX1
ENSG00000116016.14	EPAS1
ENSG00000116017.11	ARID3A
ENSG00000116030.17	SUMO1
ENSG00000116044.16	NFE2L2
ENSG00000116095.11	PLEKHA3
ENSG00000116120.11	FARSB
ENSG00000116127.19	ALMS1
ENSG00000116128.11	BCL9
ENSG00000116133.13	DHCR24
ENSG00000116138.13	DNAJC16
ENSG00000116161.18	CACYBP
ENSG00000116171.19	SCP2
ENSG00000116183.11	PAPPA2
ENSG00000116199.12	FAM20B
ENSG00000116237.16	ICMT
ENSG00000116251.11	RPL22
ENSG00000116285.13	ERRFI1
ENSG00000116288.13	PARK7
ENSG00000116459.11	ATP5PB
ENSG00000116473.14	RAP1A
ENSG00000116489.13	CAPZA1
ENSG00000116521.11	SCAMP3
ENSG00000116539.14	ASH1L
ENSG00000116560.11	SFPQ
ENSG00000116580.18	GON4L
ENSG00000116604.18	MEF2D
ENSG00000116649.10	SRM
ENSG00000116688.18	MFN2
ENSG00000116698.21	SMG7
ENSG00000116729.14	WLS
ENSG00000116745.7	RPE65
ENSG00000116747.13	RO60
ENSG00000116752.6	BCAS2
ENSG00000116754.13	SRSF11
ENSG00000116922.14	C1orf109
ENSG00000116977.19	LGALS8
ENSG00000117000.9	RLF
ENSG00000117054.14	ACADM
ENSG00000117133.11	RPF1
ENSG00000117139.18	KDM5B
ENSG00000117153.16	KLHL12
ENSG00000117155.17	SSX2IP
ENSG00000117174.11	ZNHIT6
ENSG00000117222.14	RBBP5
ENSG00000117335.20	CD46
ENSG00000117362.13	APH1A
ENSG00000117394.24	SLC2A1
ENSG00000117450.15	PRDX1
ENSG00000117500.13	TMED5
ENSG00000117505.13	DR1
ENSG00000117519.16	CNN3
ENSG00000117523.16	PRRC2C
ENSG00000117592.9	PRDX6
ENSG00000117614.10	SYF2
ENSG00000117620.15	SLC35A3
ENSG00000117632.23	STMN1
ENSG00000117682.17	DHDDS
ENSG00000117713.20	ARID1A
ENSG00000117748.10	RPA2
ENSG00000117751.18	PPP1R8
ENSG00000117862.13	TXNDC12
ENSG00000117868.17	ESYT2
ENSG00000117899.11	MESD
ENSG00000118007.13	STAG1
ENSG00000118058.23	KMT2A
ENSG00000118181.11	RPS25
ENSG00000118200.14	CAMSAP2
ENSG00000118217.6	ATF6
ENSG00000118412.13	CASP8AP2
ENSG00000118482.12	PHF3
ENSG00000118496.5	FBXO30
ENSG00000118564.15	FBXL5
ENSG00000118579.13	MED28
ENSG00000118680.14	MYL12B
ENSG00000118689.15	FOXO3
ENSG00000118816.11	CCNI
ENSG00000118873.16	RAB3GAP2
ENSG00000118900.15	UBN1
ENSG00000118961.15	LDAH
ENSG00000118985.16	ELL2
ENSG00000119048.8	UBE2B
ENSG00000119231.11	SENP5
ENSG00000119280.17	C1orf198
ENSG00000119285.11	HEATR1
ENSG00000119314.16	PTBP3
ENSG00000119318.13	RAD23B
ENSG00000119328.12	ABITRAM
ENSG00000119335.17	SET
ENSG00000119396.11	RAB14
ENSG00000119401.11	TRIM32
ENSG00000119402.17	FBXW2
ENSG00000119414.12	PPP6C
ENSG00000119421.7	NDUFA8
ENSG00000119446.14	RBM18
ENSG00000119487.17	MAPKAP1
ENSG00000119537.18	KDSR
ENSG00000119541.10	VPS4B
ENSG00000119596.18	YLPM1
ENSG00000119616.11	FCF1
ENSG00000119655.11	NPC2
ENSG00000119682.17	AREL1
ENSG00000119689.15	DLST
ENSG00000119705.10	SLIRP
ENSG00000119729.12	RHOQ
ENSG00000119760.16	SUPT7L
ENSG00000119777.20	TMEM214
ENSG00000119787.14	ATL2
ENSG00000119820.11	YIPF4
ENSG00000119899.13	SLC17A5
ENSG00000119929.13	CUTC
ENSG00000119950.21	MXI1
ENSG00000119953.14	SMNDC1
ENSG00000119969.15	HELLS
ENSG00000119977.21	TCTN3
ENSG00000119979.18	DENND10
ENSG00000120053.12	GOT1
ENSG00000120063.10	GNA13
ENSG00000120071.15	KANSL1
ENSG00000120137.7	PANK3
ENSG00000120265.18	PCMT1
ENSG00000120306.11	CYSTM1
ENSG00000120437.9	ACAT2
ENSG00000120438.12	TCP1
ENSG00000120685.20	PROSER1
ENSG00000120694.20	HSPH1
ENSG00000120705.13	ETF1
ENSG00000120709.11	FAM53C
ENSG00000120725.13	SIL1
ENSG00000120727.13	PAIP2
ENSG00000120733.14	KDM3B
ENSG00000120738.8	EGR1
ENSG00000120742.11	SERP1
ENSG00000120802.14	TMPO
ENSG00000120805.14	ARL1
ENSG00000120820.12	GLT8D2
ENSG00000120875.9	DUSP4
ENSG00000120889.13	TNFRSF10B
ENSG00000120948.18	TARDBP
ENSG00000120963.12	ZNF706
ENSG00000120992.18	LYPLA1
ENSG00000121057.13	AKAP1
ENSG00000121060.18	TRIM25
ENSG00000121274.14	TENT4B
ENSG00000121579.13	NAA50
ENSG00000121644.19	DESI2
ENSG00000121743.4	GJA3
ENSG00000121774.18	KHDRBS1
ENSG00000121864.10	ZNF639
ENSG00000121892.15	PDS5A
ENSG00000121940.16	CLCC1
ENSG00000121957.15	GPSM2
ENSG00000122012.14	SV2C
ENSG00000122068.13	FYTTD1
ENSG00000122140.11	MRPS2
ENSG00000122203.15	KIAA1191
ENSG00000122218.16	COPA
ENSG00000122257.20	RBBP6
ENSG00000122406.14	RPL5
ENSG00000122482.21	ZNF644
ENSG00000122515.15	ZMIZ2
ENSG00000122545.20	SEPTIN7
ENSG00000122565.19	CBX3
ENSG00000122566.22	HNRNPA2B1
ENSG00000122674.12	CCZ1
ENSG00000122687.19	MRM2
ENSG00000122692.9	SMU1
ENSG00000122696.14	SLC25A51
ENSG00000122705.17	CLTA
ENSG00000122741.16	DCAF10
ENSG00000122783.17	CYREN
ENSG00000122786.20	CALD1
ENSG00000122863.6	CHST3
ENSG00000122952.17	ZWINT
ENSG00000122958.15	VPS26A
ENSG00000123066.9	MED13L
ENSG00000123091.5	RNF11
ENSG00000123124.14	WWP1
ENSG00000123154.12	WDR83
ENSG00000123179.14	EBPL
ENSG00000123416.15	TUBA1B
ENSG00000123473.16	STIL
ENSG00000123505.19	AMD1
ENSG00000123562.18	MORF4L2
ENSG00000123575.9	FAM199X
ENSG00000123636.18	BAZ2B
ENSG00000123684.13	LPGAT1
ENSG00000123728.10	RAP2C
ENSG00000123908.12	AGO2
ENSG00000123933.17	MXD4
ENSG00000123975.5	CKS2
ENSG00000123983.14	ACSL3
ENSG00000123989.14	CHPF
ENSG00000124145.6	SDC4
ENSG00000124160.12	NCOA5
ENSG00000124164.16	VAPB
ENSG00000124171.9	PARD6B
ENSG00000124193.16	SRSF6
ENSG00000124198.9	ARFGEF2
ENSG00000124201.15	ZNFX1
ENSG00000124207.17	CSE1L
ENSG00000124208.16	PEDS1-UBE2V1
ENSG00000124209.4	RAB22A
ENSG00000124214.20	STAU1
ENSG00000124226.11	RNF114
ENSG00000124275.15	MTRR
ENSG00000124333.16	VAMP7
ENSG00000124333.16_PAR_Y	VAMP7
ENSG00000124380.11	SNRNP27
ENSG00000124422.12	USP22
ENSG00000124486.13	USP9X
ENSG00000124541.7	RRP36
ENSG00000124593.16	AL365205.1
ENSG00000124596.17	OARD1
ENSG00000124641.16	MED20
ENSG00000124733.5	MEA1
ENSG00000124749.17	COL21A1
ENSG00000124762.14	CDKN1A
ENSG00000124766.7	SOX4
ENSG00000124767.7	GLO1
ENSG00000124783.14	SSR1
ENSG00000124789.12	NUP153
ENSG00000124795.17	DEK
ENSG00000124831.19	LRRFIP1
ENSG00000124882.4	EREG
ENSG00000125107.18	CNOT1
ENSG00000125124.13	BBS2
ENSG00000125148.7	MT2A
ENSG00000125166.13	GOT2
ENSG00000125249.7	RAP2A
ENSG00000125484.12	GTF3C4
ENSG00000125534.10	PPDPF
ENSG00000125618.17	PAX8
ENSG00000125630.16	POLR1B
ENSG00000125648.15	SLC25A23
ENSG00000125651.14	GTF2F1
ENSG00000125686.12	MED1
ENSG00000125691.14	RPL23
ENSG00000125695.12	AC046185.1
ENSG00000125741.5	OPA3
ENSG00000125753.14	VASP
ENSG00000125772.14	GPCPD1
ENSG00000125779.22	PANK2
ENSG00000125818.18	PSMF1
ENSG00000125826.21	RBCK1
ENSG00000125834.13	STK35
ENSG00000125835.19	SNRPB
ENSG00000125863.20	MKKS
ENSG00000125868.16	DSTN
ENSG00000125875.14	TBC1D20
ENSG00000125944.21	HNRNPR
ENSG00000125952.20	MAX
ENSG00000125954.12	CHURC1-FNTB
ENSG00000125970.12	RALY
ENSG00000125971.17	DYNLRB1
ENSG00000125977.7	EIF2S2
ENSG00000126003.7	PLAGL2
ENSG00000126067.12	PSMB2
ENSG00000126106.14	TMEM53
ENSG00000126247.11	CAPNS1
ENSG00000126261.13	UBA2
ENSG00000126458.4	RRAS
ENSG00000126524.10	SBDS
ENSG00000126698.11	DNAJC8
ENSG00000126746.17	ZNF384
ENSG00000126749.16	EMG1
ENSG00000126767.18	ELK1
ENSG00000126773.13	PCNX4
ENSG00000126777.18	KTN1
ENSG00000126858.18	RHOT1
ENSG00000126878.13	AIF1L
ENSG00000126945.9	HNRNPH2
ENSG00000127022.15	CANX
ENSG00000127184.13	COX7C
ENSG00000127314.18	RAP1B
ENSG00000127418.15	FGFRL1
ENSG00000127483.19	HP1BP3
ENSG00000127526.15	SLC35E1
ENSG00000127527.14	EPS15L1
ENSG00000127530.4	OR7C1
ENSG00000127540.12	UQCR11
ENSG00000127804.13	METTL16
ENSG00000127838.14	PNKD
ENSG00000127870.17	RNF6
ENSG00000127947.16	PTPN12
ENSG00000127955.17	GNAI1
ENSG00000128016.7	ZFP36
ENSG00000128050.9	PAICS
ENSG00000128059.8	PPAT
ENSG00000128245.15	YWHAH
ENSG00000128272.15	ATF4
ENSG00000128340.15	RAC2
ENSG00000128463.13	EMC4
ENSG00000128567.17	PODXL
ENSG00000128585.18	MKLN1
ENSG00000128595.17	CALU
ENSG00000128607.14	KLHDC10
ENSG00000128789.21	PSMG2
ENSG00000128791.12	TWSG1
ENSG00000128829.12	EIF2AK4
ENSG00000128944.13	KNSTRN
ENSG00000128973.13	CLN6
ENSG00000128989.11	ARPP19
ENSG00000129055.13	ANAPC13
ENSG00000129084.18	PSMA1
ENSG00000129103.19	SUMF2
ENSG00000129116.19	PALLD
ENSG00000129128.13	SPCS3
ENSG00000129187.14	DCTD
ENSG00000129197.14	RPAIN
ENSG00000129250.12	KIF1C
ENSG00000129255.16	MPDU1
ENSG00000129315.11	CCNT1
ENSG00000129351.17	ILF3
ENSG00000129422.14	MTUS1
ENSG00000129472.15	RAB2B
ENSG00000129480.13	DTD2
ENSG00000129515.20	SNX6
ENSG00000129518.9	EAPP
ENSG00000129559.13	NEDD8
ENSG00000129562.11	DAD1
ENSG00000129625.13	REEP5
ENSG00000129696.13	TTI2
ENSG00000130066.16	SAT1
ENSG00000130119.17	GNL3L
ENSG00000130147.16	SH3BP4
ENSG00000130164.14	LDLR
ENSG00000130227.17	XPO7
ENSG00000130309.11	COLGALT1
ENSG00000130338.13	TULP4
ENSG00000130382.9	MLLT1
ENSG00000130402.13	ACTN4
ENSG00000130513.6	GDF15
ENSG00000130520.11	LSM4
ENSG00000130544.12	ZNF557
ENSG00000130559.19	CAMSAP1
ENSG00000130699.18	TAF4
ENSG00000130713.16	EXOSC2
ENSG00000130717.13	UCK1
ENSG00000130723.21	PRRC2B
ENSG00000130726.12	TRIM28
ENSG00000130741.11	EIF2S3
ENSG00000130764.10	LRRC47
ENSG00000130766.5	SESN2
ENSG00000130803.15	ZNF317
ENSG00000130821.17	SLC6A8
ENSG00000130826.18	DKC1
ENSG00000131016.17	AKAP12
ENSG00000131019.11	ULBP3
ENSG00000131023.13	LATS1
ENSG00000131043.12	AAR2
ENSG00000131051.24	RBM39
ENSG00000131100.13	ATP6V1E1
ENSG00000131115.16	ZNF227
ENSG00000131127.14	ZNF141
ENSG00000131149.19	GSE1
ENSG00000131165.16	CHMP1A
ENSG00000131236.18	CAP1
ENSG00000131238.18	PPT1
ENSG00000131263.13	RLIM
ENSG00000131323.16	TRAF3
ENSG00000131355.15	ADGRE3
ENSG00000131368.8	MRPS25
ENSG00000131374.14	TBC1D5
ENSG00000131389.17	SLC6A6
ENSG00000131462.8	TUBG1
ENSG00000131467.11	PSME3
ENSG00000131469.15	RPL27
ENSG00000131470.15	PSMC3IP
ENSG00000131473.17	ACLY
ENSG00000131503.21	ANKHD1
ENSG00000131504.17	DIAPH1
ENSG00000131508.16	UBE2D2
ENSG00000131653.13	TRAF7
ENSG00000131724.11	IL13RA1
ENSG00000131759.18	RARA
ENSG00000131773.14	KHDRBS3
ENSG00000131828.14	PDHA1
ENSG00000131871.15	SELENOS
ENSG00000131873.7	CHSY1
ENSG00000132002.9	DNAJB1
ENSG00000132155.13	RAF1
ENSG00000132199.20	ENOSF1
ENSG00000132254.13	ARFIP2
ENSG00000132256.19	TRIM5
ENSG00000132286.12	TIMM10B
ENSG00000132294.15	EFR3A
ENSG00000132305.21	IMMT
ENSG00000132313.15	MRPL35
ENSG00000132341.12	RAN
ENSG00000132356.11	PRKAA1
ENSG00000132383.12	RPA1
ENSG00000132388.12	UBE2G1
ENSG00000132405.19	TBC1D14
ENSG00000132463.14	GRSF1
ENSG00000132466.19	ANKRD17
ENSG00000132471.12	WBP2
ENSG00000132475.10	H3-3B
ENSG00000132485.14	ZRANB2
ENSG00000132507.18	EIF5A
ENSG00000132522.16	GPS2
ENSG00000132570.15	PCBD2
ENSG00000132603.15	NIP7
ENSG00000132612.16	VPS4A
ENSG00000132646.11	PCNA
ENSG00000132664.12	POLR3F
ENSG00000132692.19	BCAN
ENSG00000132698.15	RAB25
ENSG00000132763.15	MMACHC
ENSG00000132819.17	RBM38
ENSG00000132824.14	SERINC3
ENSG00000132846.6	ZBED3
ENSG00000132912.13	DCTN4
ENSG00000132952.12	USPL1
ENSG00000132953.16	XPO4
ENSG00000132963.8	POMP
ENSG00000132964.12	CDK8
ENSG00000133030.22	MPRIP
ENSG00000133065.11	SLC41A1
ENSG00000133112.17	TPT1
ENSG00000133119.13	RFC3
ENSG00000133226.17	SRRM1
ENSG00000133243.10	BTBD2
ENSG00000133318.14	RTN3
ENSG00000133393.13	CEP20
ENSG00000133477.17	FAM83F
ENSG00000133606.11	MKRN1
ENSG00000133641.18	C12orf29
ENSG00000133657.16	ATP13A3
ENSG00000133703.13	KRAS
ENSG00000133731.10	IMPA1
ENSG00000133789.15	SWAP70
ENSG00000133812.16	SBF2
ENSG00000133818.14	RRAS2
ENSG00000133872.14	SARAF
ENSG00000133884.10	DPF2
ENSG00000133895.17	MEN1
ENSG00000133983.16	COX16
ENSG00000134001.15	EIF2S1
ENSG00000134046.12	MBD2
ENSG00000134049.6	IER3IP1
ENSG00000134077.16	THUMPD3
ENSG00000134086.8	VHL
ENSG00000134108.14	ARL8B
ENSG00000134247.10	PTGFRN
ENSG00000134250.20	NOTCH2
ENSG00000134283.18	PPHLN1
ENSG00000134287.10	ARF3
ENSG00000134291.12	TMEM106C
ENSG00000134294.14	SLC38A2
ENSG00000134308.14	YWHAQ
ENSG00000134333.14	LDHA
ENSG00000134352.20	IL6ST
ENSG00000134375.11	TIMM17A
ENSG00000134419.15	RPS15A
ENSG00000134440.12	NARS1
ENSG00000134590.14	RTL8C
ENSG00000134602.16	STK26
ENSG00000134644.16	PUM1
ENSG00000134684.11	YARS1
ENSG00000134686.18	PHC2
ENSG00000134717.18	BTF3L4
ENSG00000134744.14	TUT4
ENSG00000134758.14	RNF138
ENSG00000134779.15	TPGS2
ENSG00000134824.14	FADS2
ENSG00000134825.16	TMEM258
ENSG00000134851.13	TMEM165
ENSG00000134852.15	CLOCK
ENSG00000134882.16	UBAC2
ENSG00000134884.15	ARGLU1
ENSG00000134909.18	ARHGAP32
ENSG00000134910.14	STT3A
ENSG00000134970.14	TMED7
ENSG00000134987.11	WDR36
ENSG00000135002.12	RFK
ENSG00000135018.14	UBQLN1
ENSG00000135046.14	ANXA1
ENSG00000135052.16	GOLM1
ENSG00000135069.14	PSAT1
ENSG00000135070.15	ISCA1
ENSG00000135108.15	FBXO21
ENSG00000135119.15	RNFT2
ENSG00000135164.19	DMTF1
ENSG00000135241.17	PNPLA8
ENSG00000135250.17	SRPK2
ENSG00000135269.18	TES
ENSG00000135314.12	KHDC1
ENSG00000135316.19	SYNCRIP
ENSG00000135318.12	NT5E
ENSG00000135341.18	MAP3K7
ENSG00000135387.21	CAPRIN1
ENSG00000135390.21	ATP5MC2
ENSG00000135446.17	CDK4
ENSG00000135452.10	TSPAN31
ENSG00000135454.14	B4GALNT1
ENSG00000135486.19	HNRNPA1
ENSG00000135503.13	ACVR1B
ENSG00000135535.17	CD164
ENSG00000135677.11	GNS
ENSG00000135678.12	CPM
ENSG00000135679.25	MDM2
ENSG00000135720.13	DYNC1LI2
ENSG00000135766.9	EGLN1
ENSG00000135821.19	GLUL
ENSG00000135823.14	STX6
ENSG00000135870.12	RC3H1
ENSG00000135916.16	ITM2C
ENSG00000135926.15	TMBIM1
ENSG00000135932.11	CAB39
ENSG00000135956.9	TMEM127
ENSG00000135966.13	TGFBRAP1
ENSG00000135999.12	EPC2
ENSG00000136003.16	ISCU
ENSG00000136021.19	SCYL2
ENSG00000136048.14	DRAM1
ENSG00000136100.14	VPS36
ENSG00000136108.15	CKAP2
ENSG00000136114.17	THSD1
ENSG00000136156.15	ITM2B
ENSG00000136159.4	NUDT15
ENSG00000136193.17	SCRN1
ENSG00000136231.14	IGF2BP3
ENSG00000136238.18	RAC1
ENSG00000136240.10	KDELR2
ENSG00000136243.17	NUP42
ENSG00000136261.15	BZW2
ENSG00000136273.13	HUS1
ENSG00000136295.15	TTYH3
ENSG00000136379.12	ABHD17C
ENSG00000136381.13	IREB2
ENSG00000136436.15	CALCOCO2
ENSG00000136448.13	NMT1
ENSG00000136450.13	SRSF1
ENSG00000136451.9	VEZF1
ENSG00000136485.15	DCAF7
ENSG00000136504.13	KAT7
ENSG00000136527.18	TRA2B
ENSG00000136536.15	MARCHF7
ENSG00000136560.14	TANK
ENSG00000136636.13	KCTD3
ENSG00000136699.19	SMPD4
ENSG00000136715.19	SAP130
ENSG00000136718.10	IMP4
ENSG00000136738.15	STAM
ENSG00000136758.19	YME1L1
ENSG00000136802.12	LRRC8A
ENSG00000136810.13	TXN
ENSG00000136819.15	C9orf78
ENSG00000136868.11	SLC31A1
ENSG00000136875.13	PRPF4
ENSG00000136897.8	MRPL50
ENSG00000136908.18	DPM2
ENSG00000136938.9	ANP32B
ENSG00000136942.15	RPL35
ENSG00000136986.10	DERL1
ENSG00000136997.21	MYC
ENSG00000137073.23	UBAP2
ENSG00000137074.20	APTX
ENSG00000137075.18	RNF38
ENSG00000137154.13	RPS6
ENSG00000137168.8	PPIL1
ENSG00000137275.15	RIPK1
ENSG00000137309.20	HMGA1
ENSG00000137409.19	MTCH1
ENSG00000137414.6	FAM8A1
ENSG00000137504.14	CREBZF
ENSG00000137509.11	PRCP
ENSG00000137575.12	SDCBP
ENSG00000137693.14	YAP1
ENSG00000137710.17	RDX
ENSG00000137770.14	CTDSPL2
ENSG00000137804.14	NUSAP1
ENSG00000137807.16	KIF23
ENSG00000137814.12	HAUS2
ENSG00000137818.12	RPLP1
ENSG00000137819.14	PAQR5
ENSG00000137822.13	TUBGCP4
ENSG00000137845.15	ADAM10
ENSG00000137955.16	RABGGTB
ENSG00000137962.13	ARHGAP29
ENSG00000138018.18	SELENOI
ENSG00000138031.14	ADCY3
ENSG00000138069.18	RAB1A
ENSG00000138071.14	ACTR2
ENSG00000138092.11	CENPO
ENSG00000138166.6	DUSP5
ENSG00000138180.16	CEP55
ENSG00000138279.16	ANXA7
ENSG00000138286.15	FAM149B1
ENSG00000138303.18	ASCC1
ENSG00000138326.21	RPS24
ENSG00000138386.17	NAB1
ENSG00000138413.14	IDH1
ENSG00000138430.16	OLA1
ENSG00000138434.17	ITPRID2
ENSG00000138442.10	WDR12
ENSG00000138443.17	ABI2
ENSG00000138592.14	USP8
ENSG00000138594.14	TMOD3
ENSG00000138614.15	INTS14
ENSG00000138660.12	AP1AR
ENSG00000138674.17	SEC31A
ENSG00000138698.15	RAP1GDS1
ENSG00000138709.19	LARP1B
ENSG00000138750.15	NUP54
ENSG00000138757.15	G3BP2
ENSG00000138758.12	SEPTIN11
ENSG00000138759.19	FRAS1
ENSG00000138760.10	SCARB2
ENSG00000138802.11	SEC24B
ENSG00000138814.17	PPP3CA
ENSG00000138942.16	RNF185
ENSG00000139112.11	GABARAPL1
ENSG00000139146.14	SINHCAF
ENSG00000139163.16	ETNK1
ENSG00000139218.18	SCAF11
ENSG00000139233.7	LLPH
ENSG00000139278.10	GLIPR1
ENSG00000139289.13	PHLDA1
ENSG00000139318.8	DUSP6
ENSG00000139433.11	GLTP
ENSG00000139496.16	NUP58
ENSG00000139514.13	SLC7A1
ENSG00000139624.14	CERS5
ENSG00000139625.13	MAP3K12
ENSG00000139644.13	TMBIM6
ENSG00000139687.16	RB1
ENSG00000139718.11	SETD1B
ENSG00000139722.7	VPS37B
ENSG00000139746.16	RBM26
ENSG00000139793.18	MBNL2
ENSG00000139800.8	ZIC5
ENSG00000139826.6	ABHD13
ENSG00000139921.13	TMX1
ENSG00000139971.15	ARMH4
ENSG00000139977.14	NAA30
ENSG00000140157.15	NIPA2
ENSG00000140199.13	SLC12A6
ENSG00000140262.18	TCF12
ENSG00000140263.15	SORD
ENSG00000140265.12	ZSCAN29
ENSG00000140297.13	GCNT3
ENSG00000140299.13	BNIP2
ENSG00000140307.11	GTF2A2
ENSG00000140319.11	SRP14
ENSG00000140350.15	ANP32A
ENSG00000140382.15	HMG20A
ENSG00000140391.15	TSPAN3
ENSG00000140395.9	WDR61
ENSG00000140396.13	NCOA2
ENSG00000140403.12	DNAJA4
ENSG00000140450.9	ARRDC4
ENSG00000140455.17	USP3
ENSG00000140497.16	SCAMP2
ENSG00000140526.18	ABHD2
ENSG00000140577.16	CRTC3
ENSG00000140612.14	SEC11A
ENSG00000140718.21	FTO
ENSG00000140750.17	ARHGAP17
ENSG00000140830.9	TXNL4B
ENSG00000140836.17	ZFHX3
ENSG00000140941.14	MAP1LC3B
ENSG00000140948.13	ZCCHC14
ENSG00000140988.16	RPS2
ENSG00000140992.19	PDPK1
ENSG00000140995.17	DEF8
ENSG00000141027.21	NCOR1
ENSG00000141030.13	COPS3
ENSG00000141076.18	UTP4
ENSG00000141198.16	TOM1L1
ENSG00000141219.15	C17orf80
ENSG00000141232.5	TOB1
ENSG00000141367.12	CLTC
ENSG00000141378.15	PTRH2
ENSG00000141380.14	SS18
ENSG00000141404.17	GNAL
ENSG00000141424.13	SLC39A6
ENSG00000141425.18	RPRD1A
ENSG00000141429.13	GALNT1
ENSG00000141441.16	GAREM1
ENSG00000141510.18	TP53
ENSG00000141522.12	ARHGDIA
ENSG00000141526.17	SLC16A3
ENSG00000141543.12	EIF4A3
ENSG00000141551.14	CSNK1D
ENSG00000141560.15	FN3KRP
ENSG00000141564.15	RPTOR
ENSG00000141568.21	FOXK2
ENSG00000141576.16	RNF157
ENSG00000141580.16	WDR45B
ENSG00000141646.14	SMAD4
ENSG00000141682.12	PMAIP1
ENSG00000141698.17	NT5C3B
ENSG00000141699.11	RETREG3
ENSG00000141759.15	TXNL4A
ENSG00000141858.12	SAMD1
ENSG00000141867.18	BRD4
ENSG00000141905.19	NFIC
ENSG00000141979.4	AC008764.1
ENSG00000141985.9	SH3GL1
ENSG00000142002.17	DPP9
ENSG00000142082.15	SIRT3
ENSG00000142089.16	IFITM3
ENSG00000142166.13	IFNAR1
ENSG00000142168.15	SOD1
ENSG00000142188.17	TMEM50B
ENSG00000142192.21	APP
ENSG00000142208.17	AKT1
ENSG00000142230.13	SAE1
ENSG00000142453.12	CARM1
ENSG00000142534.7	RPS11
ENSG00000142541.18	RPL13A
ENSG00000142599.19	RERE
ENSG00000142627.13	EPHA2
ENSG00000142657.21	PGD
ENSG00000142669.15	SH3BGRL3
ENSG00000142676.14	RPL11
ENSG00000142864.15	SERBP1
ENSG00000142867.14	BCL10
ENSG00000142875.19	PRKACB
ENSG00000142892.15	PIGK
ENSG00000142937.12	RPS8
ENSG00000143079.15	CTTNBP2NL
ENSG00000143106.13	PSMA5
ENSG00000143153.13	ATP1B1
ENSG00000143155.13	TIPRL
ENSG00000143157.12	POGK
ENSG00000143162.9	CREG1
ENSG00000143179.16	UCK2
ENSG00000143183.18	TMCO1
ENSG00000143224.18	PPOX
ENSG00000143319.17	ISG20L2
ENSG00000143321.19	HDGF
ENSG00000143322.21	ABL2
ENSG00000143324.14	XPR1
ENSG00000143337.19	TOR1AIP1
ENSG00000143368.10	SF3B4
ENSG00000143384.14	MCL1
ENSG00000143390.18	RFX5
ENSG00000143398.20	PIP5K1A
ENSG00000143401.15	ANP32E
ENSG00000143418.20	CERS2
ENSG00000143436.11	MRPL9
ENSG00000143442.22	POGZ
ENSG00000143443.10	C1orf56
ENSG00000143457.11	GOLPH3L
ENSG00000143473.13	KCNH1
ENSG00000143549.21	TPM3
ENSG00000143553.11	SNAPIN
ENSG00000143569.19	UBAP2L
ENSG00000143612.21	C1orf43
ENSG00000143614.10	GATAD2B
ENSG00000143641.10	GALNT2
ENSG00000143702.16	CEP170
ENSG00000143727.16	ACP1
ENSG00000143742.14	SRP9
ENSG00000143751.10	SDE2
ENSG00000143756.12	FBXO28
ENSG00000143761.16	ARF1
ENSG00000143771.12	CNIH4
ENSG00000143811.19	PYCR2
ENSG00000143815.15	LBR
ENSG00000143870.13	PDIA6
ENSG00000143882.12	ATP6V1C2
ENSG00000143933.19	CALM2
ENSG00000143947.14	RPS27A
ENSG00000143951.16	WDPCP
ENSG00000143970.17	ASXL2
ENSG00000144021.3	CIAO1
ENSG00000144043.12	TEX261
ENSG00000144063.4	MALL
ENSG00000144136.11	SLC20A1
ENSG00000144224.17	UBXN4
ENSG00000144228.9	SPOPL
ENSG00000144229.12	THSD7B
ENSG00000144231.11	POLR2D
ENSG00000144233.10	AMMECR1L
ENSG00000144283.22	PKP4
ENSG00000144290.17	SLC4A10
ENSG00000144320.14	LNPK
ENSG00000144354.14	CDCA7
ENSG00000144366.16	GULP1
ENSG00000144369.13	FAM171B
ENSG00000144381.18	HSPD1
ENSG00000144468.17	RHBDD1
ENSG00000144524.18	COPS7B
ENSG00000144560.15	VGLL4
ENSG00000144566.11	RAB5A
ENSG00000144579.8	CTDSP1
ENSG00000144580.14	CNOT9
ENSG00000144597.14	EAF1
ENSG00000144649.9	GASK1A
ENSG00000144674.16	GOLGA4
ENSG00000144711.16	IQSEC1
ENSG00000144712.12	CAND2
ENSG00000144713.13	RPL32
ENSG00000144724.20	PTPRG
ENSG00000144820.8	ADGRG7
ENSG00000144824.21	PHLDB2
ENSG00000144827.9	ABHD10
ENSG00000144840.10	RABL3
ENSG00000144848.11	ATG3
ENSG00000144867.13	SRPRB
ENSG00000144895.12	EIF2A
ENSG00000145012.13	LPP
ENSG00000145041.15	DCAF1
ENSG00000145244.12	CORIN
ENSG00000145284.12	SCD5
ENSG00000145293.16	ENOPH1
ENSG00000145332.14	KLHL8
ENSG00000145337.5	PYURF
ENSG00000145349.17	CAMK2D
ENSG00000145365.11	TIFA
ENSG00000145375.9	SPATA5
ENSG00000145386.11	CCNA2
ENSG00000145391.13	SETD7
ENSG00000145414.9	NAF1
ENSG00000145416.13	MARCHF1
ENSG00000145439.12	CBR4
ENSG00000145495.16	MARCHF6
ENSG00000145592.14	RPL37
ENSG00000145623.13	OSMR
ENSG00000145632.15	PLK2
ENSG00000145741.16	BTF3
ENSG00000145780.8	FEM1C
ENSG00000145782.13	ATG12
ENSG00000145817.17	YIPF5
ENSG00000145907.16	G3BP1
ENSG00000146007.11	ZMAT2
ENSG00000146066.3	HIGD2A
ENSG00000146072.6	TNFRSF21
ENSG00000146083.12	RNF44
ENSG00000146094.15	DOK3
ENSG00000146109.5	ABT1
ENSG00000146147.15	MLIP
ENSG00000146223.16	RPL7L1
ENSG00000146242.9	TPBG
ENSG00000146263.11	MMS22L
ENSG00000146376.11	ARHGAP18
ENSG00000146425.11	DYNLT1
ENSG00000146457.16	WTAP
ENSG00000146535.14	GNA12
ENSG00000146574.16	CCZ1B
ENSG00000146648.19	EGFR
ENSG00000146676.10	PURB
ENSG00000146729.10	NIPSNAP2
ENSG00000146731.11	CCT6A
ENSG00000146733.14	PSPH
ENSG00000146834.14	MEPCE
ENSG00000146842.17	TMEM209
ENSG00000146859.6	TMEM140
ENSG00000146872.18	TLK2
ENSG00000146963.18	LUC7L2
ENSG00000147044.22	CASK
ENSG00000147065.17	MSN
ENSG00000147140.17	NONO
ENSG00000147164.12	SNX12
ENSG00000147224.13	PRPS1
ENSG00000147274.14	RBMX
ENSG00000147403.18	RPL10
ENSG00000147416.11	ATP6V1B2
ENSG00000147419.19	CCDC25
ENSG00000147457.14	CHMP7
ENSG00000147471.12	PLPBP
ENSG00000147526.20	TACC1
ENSG00000147533.17	GOLGA7
ENSG00000147548.17	NSD3
ENSG00000147649.10	MTDH
ENSG00000147669.11	POLR2K
ENSG00000147676.14	MAL2
ENSG00000147677.11	EIF3H
ENSG00000147679.12	UTP23
ENSG00000147684.10	NDUFB9
ENSG00000147687.19	TATDN1
ENSG00000147853.17	AK3
ENSG00000147905.18	ZCCHC7
ENSG00000147955.17	SIGMAR1
ENSG00000148110.16	MFSD14B
ENSG00000148153.14	INIP
ENSG00000148154.10	UGCG
ENSG00000148175.13	STOM
ENSG00000148187.18	MRRF
ENSG00000148219.17	ASTN2
ENSG00000148229.13	POLE3
ENSG00000148248.14	SURF4
ENSG00000148337.21	CIZ1
ENSG00000148396.18	SEC16A
ENSG00000148411.8	NACC2
ENSG00000148429.14	USP6NL
ENSG00000148468.17	FAM171A1
ENSG00000148572.16	NRBF2
ENSG00000148672.9	GLUD1
ENSG00000148680.16	HTR7
ENSG00000148730.7	EIF4EBP2
ENSG00000148737.17	TCF7L2
ENSG00000148773.14	MKI67
ENSG00000148835.11	TAF5
ENSG00000148840.11	PPRC1
ENSG00000148842.18	CNNM2
ENSG00000148925.11	BTBD10
ENSG00000148943.12	LIN7C
ENSG00000149084.13	HSD17B12
ENSG00000149136.9	SSRP1
ENSG00000149187.18	CELF1
ENSG00000149218.5	ENDOD1
ENSG00000149289.11	ZC3H12C
ENSG00000149313.11	AASDHPPT
ENSG00000149346.15	SLX4IP
ENSG00000149357.10	LAMTOR1
ENSG00000149380.12	P4HA3
ENSG00000149428.19	HYOU1
ENSG00000149485.19	FADS1
ENSG00000149532.16	CPSF7
ENSG00000149547.15	EI24
ENSG00000149554.13	CHEK1
ENSG00000149557.14	FEZ1
ENSG00000149573.9	MPZL2
ENSG00000149639.15	SOGA1
ENSG00000149658.18	YTHDF1
ENSG00000149716.13	LTO1
ENSG00000149792.9	MRPL49
ENSG00000149925.22	ALDOA
ENSG00000149948.14	HMGA2
ENSG00000149970.16	CNKSR2
ENSG00000150051.14	MKX
ENSG00000150054.18	MPP7
ENSG00000150093.20	ITGB1
ENSG00000150455.13	TIRAP
ENSG00000150457.9	LATS2
ENSG00000150471.16	ADGRL3
ENSG00000150672.17	DLG2
ENSG00000150712.11	MTMR12
ENSG00000150753.12	CCT5
ENSG00000150760.13	DOCK1
ENSG00000150867.14	PIP4K2A
ENSG00000150991.15	UBC
ENSG00000151135.10	TMEM263
ENSG00000151164.19	RAD9B
ENSG00000151176.8	PLBD2
ENSG00000151233.11	GXYLT1
ENSG00000151239.14	TWF1
ENSG00000151247.12	EIF4E
ENSG00000151292.17	CSNK1G3
ENSG00000151364.17	KCTD14
ENSG00000151414.15	NEK7
ENSG00000151422.13	FER
ENSG00000151458.12	ANKRD50
ENSG00000151491.14	EPS8
ENSG00000151532.14	VTI1A
ENSG00000151553.15	FAM160B1
ENSG00000151665.13	PIGF
ENSG00000151693.11	ASAP2
ENSG00000151748.15	SAV1
ENSG00000151806.14	GUF1
ENSG00000151835.16	SACS
ENSG00000151838.12	CCDC175
ENSG00000151846.8	PABPC3
ENSG00000151893.15	CACUL1
ENSG00000151914.20	DST
ENSG00000151923.17	TIAL1
ENSG00000152056.17	AP1S3
ENSG00000152102.18	FAM168B
ENSG00000152104.12	PTPN14
ENSG00000152137.8	HSPB8
ENSG00000152229.18	PSTPIP2
ENSG00000152234.16	ATP5F1A
ENSG00000152242.11	C18orf25
ENSG00000152270.9	PDE3B
ENSG00000152291.14	TGOLN2
ENSG00000152332.16	UHMK1
ENSG00000152348.16	ATG10
ENSG00000152409.9	JMY
ENSG00000152484.14	USP12
ENSG00000152492.15	CCDC50
ENSG00000152518.8	ZFP36L2
ENSG00000152556.17	PFKM
ENSG00000152558.15	TMEM123
ENSG00000152601.17	MBNL1
ENSG00000152683.14	SLC30A6
ENSG00000152700.14	SAR1B
ENSG00000152767.17	FARP1
ENSG00000152795.17	HNRNPDL
ENSG00000152939.17	MARVELD2
ENSG00000152942.19	RAD17
ENSG00000152944.9	MED21
ENSG00000153006.16	SREK1IP1
ENSG00000153037.15	SRP19
ENSG00000153130.17	SCOC
ENSG00000153162.9	BMP6
ENSG00000153179.13	RASSF3
ENSG00000153187.20	HNRNPU
ENSG00000153201.16	RANBP2
ENSG00000153207.16	AHCTF1
ENSG00000153234.15	NR4A2
ENSG00000153310.19	CYRIB
ENSG00000153317.15	ASAP1
ENSG00000153551.14	CMTM7
ENSG00000153558.16	FBXL2
ENSG00000153560.12	UBP1
[truncated: 1,477 more rows]

## Sheet: RNase_I_005_005
#HCT116, PAR-CLIP, RNase I, in-lysate 0.05 U/μL, on-bead 0.05 U/μL, this study
ENSEMBL	SYMBOL
ENSG00000000003.15	TSPAN6
ENSG00000001084.13	GCLC
ENSG00000001167.14	NFYA
ENSG00000001561.7	ENPP4
ENSG00000001630.17	CYP51A1
ENSG00000002587.10	HS3ST1
ENSG00000002745.13	WNT16
ENSG00000002834.18	LASP1
ENSG00000003056.8	M6PR
ENSG00000003249.15	DBNDD1
ENSG00000003402.20	CFLAR
ENSG00000003436.16	TFPI
ENSG00000004142.12	POLDIP2
ENSG00000004455.17	AK2
ENSG00000004478.8	FKBP4
ENSG00000004897.12	CDC27
ENSG00000004961.15	HCCS
ENSG00000005022.6	SLC25A5
ENSG00000005100.13	DHX33
ENSG00000005156.12	LIG3
ENSG00000005187.12	ACSM3
ENSG00000005194.15	CIAPIN1
ENSG00000005339.15	CREBBP
ENSG00000005436.14	GCFC2
ENSG00000005483.21	KMT2E
ENSG00000005486.17	RHBDD2
ENSG00000005801.18	ZNF195
ENSG00000005810.18	MYCBP2
ENSG00000005812.11	FBXL3
ENSG00000005884.18	ITGA3
ENSG00000005889.16	ZFX
ENSG00000005893.16	LAMP2
ENSG00000006007.12	GDE1
ENSG00000006016.11	CRLF1
ENSG00000006125.18	AP2B1
ENSG00000006327.14	TNFRSF12A
ENSG00000006432.15	MAP3K9
ENSG00000006451.8	RALA
ENSG00000006453.14	BAIAP2L1
ENSG00000006459.11	KDM7A
ENSG00000006468.14	ETV1
ENSG00000006634.8	DBF4
ENSG00000006695.12	COX10
ENSG00000006831.10	ADIPOR2
ENSG00000007047.15	MARK4
ENSG00000007168.14	PAFAH1B1
ENSG00000007202.15	KIAA0100
ENSG00000008083.14	JARID2
ENSG00000008130.15	NADK
ENSG00000008282.9	SYPL1
ENSG00000008283.16	CYB561
ENSG00000008294.21	SPAG9
ENSG00000008394.13	MGST1
ENSG00000008441.18	NFIX
ENSG00000008952.17	SEC62
ENSG00000008988.11	RPS20
ENSG00000009307.16	CSDE1
ENSG00000009335.18	UBE3C
ENSG00000009413.16	REV3L
ENSG00000009844.16	VTA1
ENSG00000009954.11	BAZ1B
ENSG00000010017.13	RANBP9
ENSG00000010244.19	ZNF207
ENSG00000010270.14	STARD3NL
ENSG00000010404.18	IDS
ENSG00000010704.18	HFE
ENSG00000010932.17	FMO1
ENSG00000011007.12	ELOA
ENSG00000011052.21	NME1-NME2
ENSG00000011114.15	BTBD7
ENSG00000011258.16	MBTD1
ENSG00000011295.16	TTC19
ENSG00000011304.22	PTBP1
ENSG00000011347.10	SYT7
ENSG00000011405.13	PIK3C2A
ENSG00000011451.21	WIZ
ENSG00000011454.18	RABGAP1
ENSG00000012174.12	MBTPS2
ENSG00000012211.13	PRICKLE3
ENSG00000012232.9	EXTL3
ENSG00000012660.14	ELOVL5
ENSG00000012822.16	CALCOCO1
ENSG00000013306.16	SLC25A39
ENSG00000013375.16	PGM3
ENSG00000013561.18	RNF14
ENSG00000013588.9	GPRC5A
ENSG00000014824.14	SLC30A9
ENSG00000014919.13	COX15
ENSG00000015475.19	BID
ENSG00000015479.20	MATR3
ENSG00000015676.18	NUDCD3
ENSG00000017797.13	RALBP1
ENSG00000018408.15	WWTR1
ENSG00000018510.17	AGPS
ENSG00000019186.10	CYP24A1
ENSG00000019995.6	ZRANB1
ENSG00000020633.19	RUNX3
ENSG00000022277.13	RTF2
ENSG00000022840.16	RNF10
ENSG00000023041.11	ZDHHC6
ENSG00000023191.17	RNH1
ENSG00000023516.9	AKAP11
ENSG00000023572.10	GLRX2
ENSG00000023734.11	STRAP
ENSG00000023839.12	ABCC2
ENSG00000024422.12	EHD2
ENSG00000025039.15	RRAGD
ENSG00000025156.13	HSF2
ENSG00000025293.17	PHF20
ENSG00000025772.8	TOMM34
ENSG00000025800.14	KPNA6
ENSG00000026103.22	FAS
ENSG00000026508.20	CD44
ENSG00000027075.15	PRKCH
ENSG00000027697.15	IFNGR1
ENSG00000029363.17	BCLAF1
ENSG00000029364.12	SLC39A9
ENSG00000029725.17	RABEP1
ENSG00000031003.10	FAM13B
ENSG00000031698.13	SARS1
ENSG00000032742.18	IFT88
ENSG00000033050.9	ABCF2
ENSG00000033170.17	FUT8
ENSG00000033627.17	ATP6V0A1
ENSG00000033800.14	PIAS1
ENSG00000034152.19	MAP2K3
ENSG00000034510.6	TMSB10
ENSG00000034677.13	RNF19A
ENSG00000034713.8	GABARAPL2
ENSG00000035403.18	VCL
ENSG00000035862.12	TIMP2
ENSG00000036257.13	CUL3
ENSG00000036549.13	ZZZ3
ENSG00000037749.12	MFAP3
ENSG00000038274.17	MAT2B
ENSG00000038427.16	VCAN
ENSG00000039068.19	CDH1
ENSG00000039523.20	RIPOR1
ENSG00000039650.12	PNKP
ENSG00000040531.16	CTNS
ENSG00000041357.16	PSMA4
ENSG00000042445.14	RETSAT
ENSG00000043093.15	DCUN1D1
ENSG00000043143.20	JADE2
ENSG00000043355.12	ZIC2
ENSG00000044115.21	CTNNA1
ENSG00000044574.8	HSPA5
ENSG00000046604.13	DSG2
ENSG00000047648.23	ARHGAP6
ENSG00000047849.21	MAP4
ENSG00000047932.14	GOPC
ENSG00000048392.12	RRM2B
ENSG00000048405.10	ZNF800
ENSG00000048544.6	MRPS10
ENSG00000048649.13	RSF1
ENSG00000048828.17	FAM120A
ENSG00000048991.16	R3HDM1
ENSG00000049130.16	KITLG
ENSG00000049245.13	VAMP3
ENSG00000049449.10	RCN1
ENSG00000049618.24	ARID1B
ENSG00000049656.14	CLPTM1L
ENSG00000049883.15	PTCD2
ENSG00000050130.18	JKAMP
ENSG00000050344.9	NFE2L3
ENSG00000050393.11	MCUR1
ENSG00000050405.13	LIMA1
ENSG00000050426.16	LETMD1
ENSG00000051108.15	HERPUD1
ENSG00000052723.12	SIKE1
ENSG00000052841.15	TTC17
ENSG00000053254.16	FOXN3
ENSG00000053524.12	MCF2L2
ENSG00000054116.12	TRAPPC3
ENSG00000054118.15	THRAP3
ENSG00000054277.14	OPN3
ENSG00000054523.18	KIF1B
ENSG00000054598.9	FOXC1
ENSG00000054690.14	PLEKHH1
ENSG00000054965.11	FAM168A
ENSG00000055070.17	SZRD1
ENSG00000055130.17	CUL1
ENSG00000055163.20	CYFIP2
ENSG00000055208.19	TAB2
ENSG00000055332.18	EIF2AK2
ENSG00000055483.19	USP36
ENSG00000055609.19	KMT2C
ENSG00000055917.16	PUM2
ENSG00000055950.16	MRPL43
ENSG00000056050.7	HPF1
ENSG00000056097.16	ZFR
ENSG00000056277.16	ZNF280C
ENSG00000056586.16	RC3H2
ENSG00000056736.10	IL17RB
ENSG00000057019.16	DCBLD2
ENSG00000057252.13	SOAT1
ENSG00000057608.17	GDI2
ENSG00000057663.16	ATG5
ENSG00000058063.16	ATP11B
ENSG00000058262.10	SEC61A1
ENSG00000058272.19	PPP1R12A
ENSG00000058668.15	ATP2B4
ENSG00000058673.17	ZC3H11A
ENSG00000058804.12	NDC1
ENSG00000059122.17	FLYWCH1
ENSG00000059573.9	ALDH18A1
ENSG00000059728.11	MXD1
ENSG00000059758.8	CDK17
ENSG00000059769.20	DNAJC25
ENSG00000060138.13	YBX3
ENSG00000060237.18	WNK1
ENSG00000060339.14	CCAR1
ENSG00000060749.16	QSER1
ENSG00000061676.15	NCKAP1
ENSG00000061794.13	MRPS35
ENSG00000062194.16	GPBP1
ENSG00000062485.19	CS
ENSG00000062650.19	WAPL
ENSG00000062716.13	VMP1
ENSG00000062725.10	APPBP2
ENSG00000063046.18	EIF4B
ENSG00000063177.13	RPL18
ENSG00000063244.13	U2AF2
ENSG00000063322.15	MED29
ENSG00000063587.15	ZNF275
ENSG00000063601.17	MTMR1
ENSG00000063660.9	GPC1
ENSG00000063978.16	RNF4
ENSG00000064115.11	TM7SF3
ENSG00000064225.12	ST3GAL6
ENSG00000064313.12	TAF2
ENSG00000064393.16	HIPK2
ENSG00000064419.13	TNPO3
ENSG00000064666.15	CNN2
ENSG00000064726.10	BTBD1
ENSG00000065000.19	AP3D1
ENSG00000065060.17	UHRF1BP1
ENSG00000065135.12	GNAI3
ENSG00000065150.21	IPO5
ENSG00000065243.20	PKN2
ENSG00000065308.5	TRAM2
ENSG00000065427.15	KARS1
ENSG00000065526.12	SPEN
ENSG00000065548.18	ZC3H15
ENSG00000065559.15	MAP2K4
ENSG00000065621.15	GSTO2
ENSG00000065665.21	SEC61A2
ENSG00000065802.12	ASB1
ENSG00000065833.9	ME1
ENSG00000065883.16	CDK13
ENSG00000065911.13	MTHFD2
ENSG00000065970.9	FOXJ2
ENSG00000065978.19	YBX1
ENSG00000065989.16	PDE4A
ENSG00000066027.12	PPP2R5A
ENSG00000066032.18	CTNNA2
ENSG00000066044.15	ELAVL1
ENSG00000066084.13	DIP2B
ENSG00000066117.15	SMARCD1
ENSG00000066136.20	NFYC
ENSG00000066322.15	ELOVL1
ENSG00000066427.24	ATXN3
ENSG00000066583.12	ISOC1
ENSG00000066654.14	THUMPD1
ENSG00000066855.16	MTFR1
ENSG00000066926.12	FECH
ENSG00000067082.15	KLF6
ENSG00000067113.17	PLPP1
ENSG00000067167.8	TRAM1
ENSG00000067177.15	PHKA1
ENSG00000067182.8	TNFRSF1A
ENSG00000067225.18	PKM
ENSG00000067369.14	TP53BP1
ENSG00000067533.6	RRP15
ENSG00000067560.13	RHOA
ENSG00000067715.14	SYT1
ENSG00000067955.15	CBFB
ENSG00000067992.16	PDK3
ENSG00000068305.17	MEF2A
ENSG00000068366.20	ACSL4
ENSG00000068650.18	ATP11A
ENSG00000068654.16	POLR1A
ENSG00000068697.7	LAPTM4A
ENSG00000068796.19	KIF2A
ENSG00000068878.15	PSME4
ENSG00000068912.14	ERLEC1
ENSG00000069275.13	NUCKS1
ENSG00000069329.18	VPS35
ENSG00000069345.12	DNAJA2
ENSG00000069849.11	ATP1B3
ENSG00000069956.12	MAPK6
ENSG00000070018.9	LRP6
ENSG00000070087.14	PFN2
ENSG00000070159.14	PTPN3
ENSG00000070214.16	SLC44A1
ENSG00000070367.16	EXOC5
ENSG00000070476.15	ZXDC
ENSG00000070614.15	NDST1
ENSG00000070718.12	AP3M2
ENSG00000070756.17	PABPC1
ENSG00000070761.8	CFAP20
ENSG00000070770.10	CSNK2A2
ENSG00000070831.17	CDC42
ENSG00000070882.13	OSBPL3
ENSG00000070961.16	ATP2B1
ENSG00000071054.16	MAP4K4
ENSG00000071082.11	RPL31
ENSG00000071127.17	WDR1
ENSG00000071537.14	SEL1L
ENSG00000071564.17	TCF3
ENSG00000071626.17	DAZAP1
ENSG00000071967.12	CYBRD1
ENSG00000071994.11	PDCD2
ENSG00000072042.13	RDH11
ENSG00000072062.15	PRKACA
ENSG00000072071.16	ADGRL1
ENSG00000072110.15	ACTN1
ENSG00000072210.19	ALDH3A2
ENSG00000072274.13	TFRC
ENSG00000072310.17	SREBF1
ENSG00000072364.13	AFF4
ENSG00000072401.15	UBE2D1
ENSG00000072415.10	MPP5
ENSG00000072501.19	SMC1A
ENSG00000072518.21	MARK2
ENSG00000072609.18	CHFR
ENSG00000072736.19	NFATC3
ENSG00000072803.17	FBXW11
ENSG00000072849.11	DERL2
ENSG00000072864.16	NDE1
ENSG00000073008.15	PVR
ENSG00000073584.20	SMARCE1
ENSG00000073792.16	IGF2BP2
ENSG00000073803.14	MAP3K13
ENSG00000073849.16	ST6GAL1
ENSG00000073921.18	PICALM
ENSG00000073969.18	NSF
ENSG00000074054.20	CLASP1
ENSG00000074201.9	CLNS1A
ENSG00000074211.14	PPP2R2C
ENSG00000074219.14	TEAD2
ENSG00000074319.13	TSG101
ENSG00000074356.17	NCBP3
ENSG00000074695.6	LMAN1
ENSG00000074696.13	HACD3
ENSG00000074800.16	ENO1
ENSG00000075043.19	KCNQ2
ENSG00000075151.21	EIF4G3
ENSG00000075213.11	SEMA3A
ENSG00000075391.17	RASAL2
ENSG00000075399.14	VPS9D1
ENSG00000075407.18	ZNF37A
ENSG00000075415.13	SLC25A3
ENSG00000075420.13	FNDC3B
ENSG00000075426.12	FOSL2
ENSG00000075568.17	TMEM131
ENSG00000075618.18	FSCN1
ENSG00000075624.17	ACTB
ENSG00000075711.21	DLG1
ENSG00000075785.14	RAB7A
ENSG00000075975.17	MKRN2
ENSG00000076043.11	REXO2
ENSG00000076053.12	RBM7
ENSG00000076067.13	RBMS2
ENSG00000076108.12	BAZ2A
ENSG00000076201.15	PTPN23
ENSG00000076258.10	FMO4
ENSG00000076321.11	KLHL20
ENSG00000076554.15	TPD52
ENSG00000076685.19	NT5C2
ENSG00000077147.16	TM9SF3
ENSG00000077380.16	DYNC1I2
ENSG00000077549.19	CAPZB
ENSG00000077585.14	GPR137B
ENSG00000077721.16	UBE2A
ENSG00000078043.16	PIAS2
ENSG00000078061.13	ARAF
ENSG00000078124.12	ACER3
ENSG00000078140.14	UBE2K
ENSG00000078237.7	TIGAR
ENSG00000078246.17	TULP3
ENSG00000078304.19	PPP2R5C
ENSG00000078369.18	GNB1
ENSG00000078399.19	HOXA9
ENSG00000078403.17	MLLT10
ENSG00000078668.14	VDAC3
ENSG00000078747.16	ITCH
ENSG00000078795.17	PKD2L2
ENSG00000079246.16	XRCC5
ENSG00000079313.15	REXO1
ENSG00000079332.15	SAR1A
ENSG00000079387.14	SENP1
ENSG00000079432.7	CIC
ENSG00000079739.17	PGM1
ENSG00000080189.15	SLC35C2
ENSG00000080345.18	RIF1
ENSG00000080371.6	RAB21
ENSG00000080546.13	SESN1
ENSG00000080603.17	SRCAP
ENSG00000080608.10	PUM3
ENSG00000080802.19	CNOT4
ENSG00000080815.19	PSEN1
ENSG00000080819.9	CPOX
ENSG00000080822.17	CLDND1
ENSG00000080824.19	HSP90AA1
ENSG00000080845.18	DLGAP4
ENSG00000081019.13	RSBN1
ENSG00000081026.19	MAGI3
ENSG00000081154.12	PCNP
ENSG00000081177.18	EXD2
ENSG00000081181.8	ARG2
ENSG00000082153.18	BZW1
ENSG00000082213.18	C5orf22
ENSG00000082258.13	CCNT2
ENSG00000082269.17	FAM135A
ENSG00000082516.9	GEMIN5
ENSG00000082641.16	NFE2L1
ENSG00000082701.17	GSK3B
ENSG00000082805.20	ERC1
ENSG00000082898.18	XPO1
ENSG00000082996.20	RNF13
ENSG00000083097.14	DOP1A
ENSG00000083168.11	KAT6A
ENSG00000083312.17	TNPO1
ENSG00000083444.17	PLOD1
ENSG00000083520.15	DIS3
ENSG00000083844.10	ZNF264
ENSG00000083845.9	RPS5
ENSG00000083857.14	FAT1
ENSG00000083896.13	YTHDC1
ENSG00000083937.10	CHMP2B
ENSG00000084073.10	ZMPSTE24
ENSG00000084090.13	STARD7
ENSG00000084092.7	NOA1
ENSG00000084093.19	REST
ENSG00000084112.15	SSH1
ENSG00000084234.18	APLP2
ENSG00000084463.8	WBP11
ENSG00000084652.16	TXLNA
ENSG00000084693.16	AGBL5
ENSG00000084733.11	RAB10
ENSG00000085063.17	CD59
ENSG00000085185.15	BCORL1
ENSG00000085231.14	AK6
ENSG00000085276.19	MECOM
ENSG00000085365.18	SCAMP1
ENSG00000085415.16	SEH1L
ENSG00000085433.16	WDR47
ENSG00000085449.15	WDFY1
ENSG00000085719.13	CPNE3
ENSG00000085721.13	RRN3
ENSG00000085788.14	DDHD2
ENSG00000085872.15	CHERP
ENSG00000085978.22	ATG16L1
ENSG00000085998.14	POMGNT1
ENSG00000086061.16	DNAJA1
ENSG00000086062.13	B4GALT1
ENSG00000086065.14	CHMP5
ENSG00000086189.10	DIMT1
ENSG00000086232.13	EIF2AK1
ENSG00000086289.12	EPDR1
ENSG00000086475.15	SEPHS1
ENSG00000086589.12	RBM22
ENSG00000086598.11	TMED2
ENSG00000086666.19	ZFAND6
ENSG00000086712.13	TXLNG
ENSG00000086758.16	HUWE1
ENSG00000087053.20	MTMR2
ENSG00000087077.14	TRIP6
ENSG00000087086.15	FTL
ENSG00000087088.20	BAX
ENSG00000087111.21	PIGS
ENSG00000087152.15	ATXN7L3
ENSG00000087263.17	OGFOD1
ENSG00000087274.17	ADD1
ENSG00000087302.9	RTRAF
ENSG00000087365.16	SF3B2
ENSG00000087448.11	KLHL42
ENSG00000087995.16	METTL2A
ENSG00000088205.13	DDX18
ENSG00000088247.17	KHSRP
ENSG00000088256.9	GNA11
ENSG00000088367.23	EPB41L1
ENSG00000088387.19	DOCK9
ENSG00000088448.14	ANKRD10
ENSG00000088682.14	COQ9
ENSG00000088808.18	PPP1R13B
ENSG00000088812.18	ATRN
ENSG00000088832.18	FKBP1A
ENSG00000088888.18	MAVS
ENSG00000088930.8	XRN2
ENSG00000088970.16	KIZ
ENSG00000088986.11	DYNLL1
ENSG00000089006.17	SNX5
ENSG00000089009.15	RPL6
ENSG00000089057.15	SLC23A2
ENSG00000089063.15	TMEM230
ENSG00000089094.19	KDM2B
ENSG00000089157.16	RPLP0
ENSG00000089159.16	PXN
ENSG00000089234.16	BRAP
ENSG00000089248.7	ERP29
ENSG00000089597.18	GANAB
ENSG00000089693.11	MLF2
ENSG00000089737.17	DDX24
ENSG00000089818.18	NECAP1
ENSG00000089876.12	DHX32
ENSG00000089902.10	RCOR1
ENSG00000089916.18	GPATCH2L
ENSG00000090054.15	SPTLC1
ENSG00000090060.18	PAPOLA
ENSG00000090061.17	CCNK
ENSG00000090097.22	PCBP4
ENSG00000090266.13	NDUFB2
ENSG00000090316.16	MAEA
ENSG00000090372.15	STRN4
ENSG00000090432.7	MUL1
ENSG00000090487.11	SPG21
ENSG00000090612.22	ZNF268
ENSG00000090615.15	GOLGA3
ENSG00000090621.15	PABPC4
ENSG00000090776.6	EFNB1
ENSG00000090857.14	PDPR
ENSG00000090861.17	AARS1
ENSG00000090863.12	GLG1
ENSG00000090905.19	TNRC6A
ENSG00000091009.8	RBM27
ENSG00000091039.17	OSBPL8
ENSG00000091140.14	DLD
ENSG00000091164.13	TXNL1
ENSG00000091317.8	CMTM6
ENSG00000091409.15	ITGA6
ENSG00000091527.16	CDV3
ENSG00000091542.9	ALKBH5
ENSG00000091656.19	ZFHX4
ENSG00000092140.16	G2E3
ENSG00000092148.13	HECTD1
ENSG00000092199.18	HNRNPC
ENSG00000092201.10	SUPT16H
ENSG00000092203.15	TOX4
ENSG00000092531.10	SNAP23
ENSG00000092820.18	EZR
ENSG00000092841.19	MYL6
ENSG00000092847.13	AGO1
ENSG00000092871.17	RFFL
ENSG00000093000.19	NUP50
ENSG00000093010.15	COMT
ENSG00000093144.19	ECHDC1
ENSG00000093167.18	LRRFIP2
ENSG00000093183.14	SEC22C
ENSG00000094880.11	CDC23
ENSG00000094916.16	CBX5
ENSG00000094975.14	SUCO
ENSG00000095139.14	ARCN1
ENSG00000095261.14	PSMD5
ENSG00000095539.15	SEMA4G
ENSG00000095574.12	IKZF5
ENSG00000095787.23	WAC
ENSG00000095951.17	HIVEP1
ENSG00000096060.15	FKBP5
ENSG00000096063.16	SRPK1
ENSG00000096093.16	EFHC1
ENSG00000096384.20	HSP90AB1
ENSG00000096696.14	DSP
ENSG00000096717.12	SIRT1
ENSG00000097007.19	ABL1
ENSG00000097021.20	ACOT7
ENSG00000097033.14	SH3GLB1
ENSG00000099194.6	SCD
ENSG00000099204.20	ABLIM1
ENSG00000099219.14	ERMP1
ENSG00000099246.17	RAB18
ENSG00000099341.11	PSMD8
ENSG00000099381.18	SETD1A
ENSG00000099399.6	MAGEB2
ENSG00000099715.14	PCDH11Y
ENSG00000099725.14	PRKY
ENSG00000099797.15	TECR
ENSG00000099810.21	MTAP
ENSG00000099814.16	CEP170B
ENSG00000099817.12	POLR2E
ENSG00000099875.15	MKNK2
ENSG00000099904.16	ZDHHC8
ENSG00000099917.17	MED15
ENSG00000099940.12	SNAP29
ENSG00000099942.13	CRKL
ENSG00000099968.18	BCL2L13
ENSG00000099995.19	SF3A1
ENSG00000100028.12	SNRPD3
ENSG00000100030.15	MAPK1
ENSG00000100075.10	SLC25A1
ENSG00000100077.15	GRK3
ENSG00000100104.13	SRRD
ENSG00000100109.17	TFIP11
ENSG00000100129.18	EIF3L
ENSG00000100138.15	SNU13
ENSG00000100147.14	CCDC134
ENSG00000100196.11	KDELR3
ENSG00000100201.23	DDX17
ENSG00000100216.6	TOMM22
ENSG00000100219.16	XBP1
ENSG00000100221.10	JOSD1
ENSG00000100225.18	FBXO7
ENSG00000100226.16	GTPBP1
ENSG00000100227.18	POLDIP3
ENSG00000100243.21	CYB5R3
ENSG00000100266.19	PACSIN2
ENSG00000100281.14	HMGXB4
ENSG00000100296.14	THOC5
ENSG00000100304.13	TTLL12
ENSG00000100316.16	RPL3
ENSG00000100320.23	RBFOX2
ENSG00000100335.15	MIEF1
ENSG00000100345.22	MYH9
ENSG00000100353.18	EIF3D
ENSG00000100354.21	TNRC6B
ENSG00000100364.19	KIAA0930
ENSG00000100380.14	ST13
ENSG00000100393.14	EP300
ENSG00000100410.8	PHF5A
ENSG00000100412.17	ACO2
ENSG00000100413.17	POLR3H
ENSG00000100418.8	DESI1
ENSG00000100426.7	ZBED4
ENSG00000100441.10	KHNYN
ENSG00000100445.17	SDR39U1
ENSG00000100461.18	RBM23
ENSG00000100462.16	PRMT5
ENSG00000100473.18	COCH
ENSG00000100478.15	AP4S1
ENSG00000100522.10	GNPNAT1
ENSG00000100523.16	DDHD1
ENSG00000100528.12	CNIH1
ENSG00000100554.12	ATP6V1D
ENSG00000100558.9	PLEK2
ENSG00000100564.9	PIGH
ENSG00000100568.11	VTI1B
ENSG00000100578.18	KIAA0586
ENSG00000100580.8	TMED8
ENSG00000100591.8	AHSA1
ENSG00000100596.7	SPTLC2
ENSG00000100614.18	PPM1A
ENSG00000100625.9	SIX4
ENSG00000100632.11	ERH
ENSG00000100644.17	HIF1A
ENSG00000100647.8	SUSD6
ENSG00000100664.11	EIF5
ENSG00000100711.14	ZFYVE21
ENSG00000100731.16	PCNX1
ENSG00000100744.15	GSKIP
ENSG00000100796.17	PPP4R3A
ENSG00000100804.19	PSMB5
ENSG00000100811.14	YY1
ENSG00000100813.14	ACIN1
ENSG00000100814.18	CCNB1IP1
ENSG00000100815.12	TRIP11
ENSG00000100823.12	APEX1
ENSG00000100836.10	PABPN1
ENSG00000100852.13	ARHGAP5
ENSG00000100902.11	PSMA6
ENSG00000100916.14	BRMS1L
ENSG00000100934.15	SEC23A
ENSG00000100938.18	GMPR2
ENSG00000100941.9	PNN
ENSG00000101079.21	NDRG3
ENSG00000101082.14	SLA2
ENSG00000101084.18	RAB5IF
ENSG00000101104.13	PABPC1L
ENSG00000101109.12	STK4
ENSG00000101126.18	ADNP
ENSG00000101138.12	CSTF1
ENSG00000101150.18	TPD52L2
ENSG00000101158.15	NELFCD
ENSG00000101166.16	PRELID3B
ENSG00000101182.15	PSMA7
ENSG00000101187.16	SLCO4A1
ENSG00000101188.5	NTSR1
ENSG00000101191.17	DIDO1
ENSG00000101193.8	GID8
ENSG00000101224.17	CDC25B
ENSG00000101236.17	RNF24
ENSG00000101255.11	TRIB3
ENSG00000101266.19	CSNK2A1
ENSG00000101290.14	CDS2
ENSG00000101311.16	FERMT1
ENSG00000101337.16	TM9SF4
ENSG00000101343.15	CRNKL1
ENSG00000101346.14	POFUT1
ENSG00000101350.8	KIF3B
ENSG00000101361.17	NOP56
ENSG00000101363.12	MANBAL
ENSG00000101367.9	MAPRE1
ENSG00000101413.12	RPRD1B
ENSG00000101421.4	CHMP4B
ENSG00000101439.9	CST3
ENSG00000101440.9	ASIP
ENSG00000101444.13	AHCY
ENSG00000101474.12	APMAP
ENSG00000101493.11	ZNF516
ENSG00000101544.9	ADNP2
ENSG00000101557.15	USP14
ENSG00000101558.14	VAPA
ENSG00000101608.13	MYL12A
ENSG00000101654.18	RNMT
ENSG00000101695.9	RNF125
ENSG00000101752.12	MIB1
ENSG00000101773.19	RBBP8
ENSG00000101843.19	PSMD10
ENSG00000101849.17	TBL1X
ENSG00000101856.10	PGRMC1
ENSG00000101871.16	MID1
ENSG00000101888.12	NXT2
ENSG00000101911.13	PRPS2
ENSG00000101928.13	MOSPD1
ENSG00000101935.10	AMMECR1
ENSG00000101966.13	XIAP
ENSG00000101972.19	STAG2
ENSG00000102007.11	PLP2
ENSG00000102034.17	ELF4
ENSG00000102054.18	RBBP7
ENSG00000102096.9	PIM2
ENSG00000102100.16	SLC35A2
ENSG00000102144.15	PGK1
ENSG00000102158.20	MAGT1
ENSG00000102225.16	CDK16
ENSG00000102290.22	PCDH11X
ENSG00000102309.15	PIN4
ENSG00000102317.18	RBM3
ENSG00000102471.14	NDFIP2
ENSG00000102531.16	FNDC3A
ENSG00000102554.14	KLF5
ENSG00000102572.15	STK24
ENSG00000102580.15	DNAJC3
ENSG00000102606.18	ARHGEF7
ENSG00000102699.6	PARP4
ENSG00000102743.15	SLC25A15
ENSG00000102753.10	KPNA3
ENSG00000102804.15	TSC22D1
ENSG00000102805.16	CLN5
ENSG00000102858.13	MGRN1
ENSG00000102870.6	ZNF629
ENSG00000102898.12	NUTF2
ENSG00000102908.22	NFAT5
ENSG00000102910.14	LONP2
ENSG00000102931.8	ARL2BP
ENSG00000102934.10	PLLP
ENSG00000102967.12	DHODH
ENSG00000102974.16	CTCF
ENSG00000102978.13	POLR2C
ENSG00000103005.12	USB1
ENSG00000103018.17	CYB5B
ENSG00000103021.9	CCDC113
ENSG00000103023.12	PRSS54
ENSG00000103035.11	PSMD7
ENSG00000103037.12	SETD6
ENSG00000103042.9	SLC38A7
ENSG00000103044.11	HAS3
ENSG00000103061.13	SLC7A6OS
ENSG00000103064.15	SLC7A6
ENSG00000103111.15	MON1B
ENSG00000103160.12	HSDL1
ENSG00000103187.8	COTL1
ENSG00000103194.16	USP10
ENSG00000103202.13	NME4
ENSG00000103222.20	ABCC1
ENSG00000103257.9	SLC7A5
ENSG00000103264.18	FBXO31
ENSG00000103266.11	STUB1
ENSG00000103275.21	UBE2I
ENSG00000103335.22	PIEZO1
ENSG00000103342.13	GSPT1
ENSG00000103353.16	UBFD1
ENSG00000103356.18	EARS2
ENSG00000103365.15	GGA2
ENSG00000103404.14	USP31
ENSG00000103423.14	DNAJA3
ENSG00000103429.11	BFAR
ENSG00000103502.14	CDIPT
ENSG00000103591.13	AAGAB
ENSG00000103642.12	LACTB
ENSG00000103740.10	ACSBG1
ENSG00000103769.10	RAB11A
ENSG00000103855.18	CD276
ENSG00000103966.11	EHD4
ENSG00000104047.15	DTWD1
ENSG00000104064.18	GABPB1
ENSG00000104067.17	TJP1
ENSG00000104131.13	EIF3J
ENSG00000104133.15	SPG11
ENSG00000104164.12	BLOC1S6
ENSG00000104213.13	PDGFRL
ENSG00000104219.13	ZDHHC2
ENSG00000104231.11	ZFAND1
ENSG00000104290.11	FZD3
ENSG00000104312.8	RIPK2
ENSG00000104320.14	NBN
ENSG00000104331.9	BPNT2
ENSG00000104341.17	LAPTM4B
ENSG00000104343.21	UBE2W
ENSG00000104375.17	STK3
ENSG00000104388.15	RAB2A
ENSG00000104408.11	EIF3E
ENSG00000104413.18	ESRP1
ENSG00000104419.17	NDRG1
ENSG00000104442.10	ARMC1
ENSG00000104450.13	SPAG1
ENSG00000104472.10	CHRAC1
ENSG00000104517.13	UBR5
ENSG00000104611.12	SH2D4A
ENSG00000104626.15	ERI1
ENSG00000104635.15	SLC39A14
ENSG00000104660.19	LEPROTL1
ENSG00000104687.14	GSR
ENSG00000104689.10	TNFRSF10A
ENSG00000104691.16	UBXN8
ENSG00000104695.13	PPP2CB
ENSG00000104756.16	KCTD9
ENSG00000104763.20	ASAH1
ENSG00000104765.16	BNIP3L
ENSG00000104805.16	NUCB1
ENSG00000104812.15	GYS1
ENSG00000104824.17	HNRNPL
ENSG00000104853.16	CLPTM1
ENSG00000104881.16	PPP1R13L
ENSG00000104897.10	SF3A2
ENSG00000104904.12	OAZ1
ENSG00000104951.16	IL4I1
ENSG00000104964.15	TLE5
ENSG00000104969.11	SGTA
ENSG00000104973.19	MED25
ENSG00000104979.9	C19orf53
ENSG00000105011.9	ASF1B
ENSG00000105058.12	FAM32A
ENSG00000105072.9	C19orf44
ENSG00000105176.18	URI1
ENSG00000105186.16	ANKRD27
ENSG00000105193.9	RPS16
ENSG00000105220.17	GPI
ENSG00000105221.18	AKT2
ENSG00000105245.9	NUMBL
ENSG00000105281.12	SLC1A5
ENSG00000105323.17	HNRNPUL1
ENSG00000105329.11	TGFB1
ENSG00000105341.19	DMAC2
ENSG00000105355.9	PLIN3
ENSG00000105372.8	RPS19
ENSG00000105401.9	CDC37
ENSG00000105426.17	PTPRS
ENSG00000105438.9	KDELR1
ENSG00000105447.13	GRWD1
ENSG00000105514.8	RAB3D
ENSG00000105552.15	BCAT2
ENSG00000105568.18	PPP2R1A
ENSG00000105576.15	TNPO2
ENSG00000105583.11	WDR83OS
ENSG00000105640.13	RPL18A
ENSG00000105647.19	PIK3R2
ENSG00000105649.10	RAB3A
ENSG00000105655.19	ISYNA1
ENSG00000105700.11	KXD1
ENSG00000105722.10	ERF
ENSG00000105723.13	GSK3A
ENSG00000105738.11	SIPA1L3
ENSG00000105778.19	AVL9
ENSG00000105793.16	GTPBP10
ENSG00000105810.10	CDK6
ENSG00000105835.12	NAMPT
ENSG00000105849.6	POLR1F
ENSG00000105856.14	HBP1
ENSG00000105877.18	DNAH11
ENSG00000105879.12	CBLL1
ENSG00000105887.11	MTPN
ENSG00000105889.16	STEAP1B
ENSG00000105926.16	MPP6
ENSG00000105939.13	ZC3HAV1
ENSG00000105968.19	H2AZ2
ENSG00000105971.15	CAV2
ENSG00000105974.13	CAV1
ENSG00000105976.16	MET
ENSG00000105983.22	LMBR1
ENSG00000105993.15	DNAJB6
ENSG00000106052.13	TAX1BP1
ENSG00000106070.20	GRB10
ENSG00000106080.11	FKBP14
ENSG00000106086.20	PLEKHA8
ENSG00000106105.15	GARS1
ENSG00000106144.20	CASP2
ENSG00000106211.10	HSPB1
ENSG00000106244.13	PDAP1
ENSG00000106246.18	PTCD1
ENSG00000106261.17	ZKSCAN1
ENSG00000106263.18	EIF3B
ENSG00000106290.15	TAF6
ENSG00000106299.8	WASL
ENSG00000106344.8	RBM28
ENSG00000106346.11	USP42
ENSG00000106348.18	IMPDH1
ENSG00000106460.19	TMEM106B
ENSG00000106484.16	MEST
ENSG00000106546.14	AHR
ENSG00000106554.13	CHCHD3
ENSG00000106588.12	PSMA2
ENSG00000106603.19	COA1
ENSG00000106609.16	TMEM248
ENSG00000106615.10	RHEB
ENSG00000106617.15	PRKAG2
ENSG00000106628.11	POLD2
ENSG00000106635.8	BCL7B
ENSG00000106636.9	YKT6
ENSG00000106665.16	CLIP2
ENSG00000106682.15	EIF4H
ENSG00000106683.15	LIMK1
ENSG00000106692.15	FKTN
ENSG00000106723.17	SPIN1
ENSG00000106771.13	TMEM245
ENSG00000106785.15	TRIM14
ENSG00000106799.13	TGFBR1
ENSG00000107036.12	RIC1
ENSG00000107104.20	KANK1
ENSG00000107130.10	NCS1
ENSG00000107164.16	FUBP3
ENSG00000107185.10	RGP1
ENSG00000107262.26	BAG1
ENSG00000107290.14	SETX
ENSG00000107341.5	UBE2R2
ENSG00000107372.13	ZFAND5
ENSG00000107443.16	CCNJ
ENSG00000107554.17	DNMBP
ENSG00000107560.12	RAB11FIP2
ENSG00000107566.14	ERLIN1
ENSG00000107581.13	EIF3A
ENSG00000107651.13	SEC23IP
ENSG00000107669.18	ATE1
ENSG00000107679.14	PLEKHA1
ENSG00000107731.12	UNC5B
ENSG00000107771.17	CCSER2
ENSG00000107779.14	BMPR1A
ENSG00000107789.16	MINPP1
ENSG00000107798.18	LIPA
ENSG00000107815.10	TWNK
ENSG00000107816.17	LZTS2
ENSG00000107854.6	TNKS2
ENSG00000107862.6	GBF1
ENSG00000107863.18	ARHGAP21
ENSG00000107897.20	ACBD5
ENSG00000107929.15	LARP4B
ENSG00000107937.19	GTPBP4
ENSG00000107949.17	BCCIP
ENSG00000107951.15	MTPAP
ENSG00000107984.10	DKK1
ENSG00000108021.20	TASOR2
ENSG00000108061.12	SHOC2
ENSG00000108064.11	TFAM
ENSG00000108091.11	CCDC6
ENSG00000108100.18	CCNY
ENSG00000108107.15	RPL28
ENSG00000108175.17	ZMIZ1
ENSG00000108179.14	PPIF
ENSG00000108219.15	TSPAN14
ENSG00000108256.9	NUFIP2
ENSG00000108262.16	GIT1
ENSG00000108298.12	RPL19
ENSG00000108306.13	FBXL20
ENSG00000108344.15	PSMD3
ENSG00000108349.17	CASC3
ENSG00000108389.9	MTMR4
ENSG00000108406.10	DHX40
ENSG00000108424.11	KPNB1
ENSG00000108433.17	GOSR2
ENSG00000108439.11	PNPO
ENSG00000108443.14	RPS6KB1
ENSG00000108468.15	CBX1
ENSG00000108510.10	MED13
ENSG00000108518.8	PFN1
ENSG00000108523.16	RNF167
ENSG00000108557.19	RAI1
ENSG00000108559.12	NUP88
ENSG00000108561.8	C1QBP
ENSG00000108582.12	CPD
ENSG00000108587.16	GOSR1
ENSG00000108588.14	CCDC47
ENSG00000108599.15	AKAP10
ENSG00000108639.8	SYNGR2
ENSG00000108654.16	DDX5
ENSG00000108671.11	PSMD11
ENSG00000108679.13	LGALS3BP
ENSG00000108774.15	RAB5C
ENSG00000108788.12	MLX
ENSG00000108819.11	PPP1R9B
ENSG00000108828.16	VAT1
ENSG00000108829.10	LRRC59
ENSG00000108854.16	SMURF2
ENSG00000108861.9	DUSP3
ENSG00000108932.12	SLC16A6
ENSG00000108946.15	PRKAR1A
ENSG00000108953.17	YWHAE
ENSG00000109062.12	SLC9A3R1
ENSG00000109079.10	TNFAIP1
ENSG00000109084.14	TMEM97
ENSG00000109089.7	CDR2L
ENSG00000109099.16	PMP22
ENSG00000109118.14	PHF12
ENSG00000109133.13	TMEM33
ENSG00000109171.15	SLAIN2
ENSG00000109180.15	OCIAD1
ENSG00000109189.13	USP46
ENSG00000109270.13	LAMTOR3
ENSG00000109320.13	NFKB1
ENSG00000109321.11	AREG
ENSG00000109323.11	MANBA
ENSG00000109332.20	UBE2D3
ENSG00000109381.20	ELF2
ENSG00000109390.13	NDUFC1
ENSG00000109519.13	GRPEL1
ENSG00000109572.14	CLCN3
ENSG00000109586.12	GALNT7
ENSG00000109606.13	DHX15
ENSG00000109654.16	TRIM2
ENSG00000109670.16	FBXW7
ENSG00000109685.19	NSD2
ENSG00000109686.19	SH3D19
ENSG00000109689.18	STIM2
ENSG00000109736.15	MFSD10
ENSG00000109787.13	KLF3
ENSG00000109814.12	UGDH
ENSG00000109854.14	HTATIP2
ENSG00000109929.10	SC5D
ENSG00000109971.14	HSPA8
ENSG00000110013.13	SIAE
ENSG00000110048.12	OSBP
ENSG00000110063.10	DCPS
ENSG00000110066.15	KMT5B
ENSG00000110075.15	PPP6R3
ENSG00000110092.4	CCND1
ENSG00000110104.13	CCDC86
ENSG00000110107.9	PRPF19
ENSG00000110108.10	TMEM109
ENSG00000110172.12	CHORDC1
ENSG00000110218.9	PANX1
ENSG00000110315.7	RNF141
ENSG00000110321.19	EIF4G2
ENSG00000110328.6	GALNT18
ENSG00000110330.8	BIRC2
ENSG00000110344.10	UBE4A
ENSG00000110367.13	DDX6
ENSG00000110395.7	CBL
ENSG00000110400.11	NECTIN1
ENSG00000110422.12	HIPK3
ENSG00000110651.12	CD81
ENSG00000110660.15	SLC35F2
ENSG00000110696.10	C11orf58
ENSG00000110700.7	RPS13
ENSG00000110713.17	NUP98
ENSG00000110841.14	PPFIBP1
ENSG00000110851.12	PRDM4
ENSG00000110880.11	CORO1C
ENSG00000110906.13	KCTD10
ENSG00000110917.8	MLEC
ENSG00000110925.7	CSRNP2
ENSG00000110931.19	CAMKK2
ENSG00000110955.9	ATP5F1B
ENSG00000110958.16	PTGES3
ENSG00000110987.9	BCL7A
ENSG00000111011.18	RSRC2
ENSG00000111142.14	METAP2
ENSG00000111145.8	ELK3
ENSG00000111186.13	WNT5B
ENSG00000111224.14	PARP11
ENSG00000111252.11	SH2B3
ENSG00000111266.9	DUSP16
ENSG00000111269.3	CREBL2
ENSG00000111300.10	NAA25
ENSG00000111319.13	SCNN1A
ENSG00000111321.11	LTBR
ENSG00000111328.7	CDK2AP1
ENSG00000111358.14	GTF2H3
ENSG00000111371.16	SLC38A1
ENSG00000111412.6	SPRING1
ENSG00000111450.14	STX2
ENSG00000111481.10	COPZ1
ENSG00000111530.13	CAND1
ENSG00000111540.16	RAB5B
ENSG00000111605.18	CPSF6
ENSG00000111615.14	KRR1
ENSG00000111640.15	GAPDH
ENSG00000111652.10	COPS7A
ENSG00000111669.15	TPI1
ENSG00000111670.16	GNPTAB
ENSG00000111676.15	ATN1
ENSG00000111684.11	LPCAT3
ENSG00000111707.12	SUDS3
ENSG00000111711.10	GOLT1B
ENSG00000111716.14	LDHB
ENSG00000111725.11	PRKAB1
ENSG00000111737.12	RAB35
ENSG00000111752.11	PHC1
ENSG00000111775.3	COX6A1
ENSG00000111780.8	AL021546.1
ENSG00000111786.9	SRSF9
ENSG00000111817.19	DSE
ENSG00000111885.7	MAN1A1
ENSG00000111897.7	SERINC1
ENSG00000111906.18	HDDC2
ENSG00000111907.21	TPD52L1
ENSG00000112031.16	MTRF1L
ENSG00000112062.11	MAPK14
ENSG00000112078.14	KCTD20
ENSG00000112079.9	STK38
ENSG00000112081.17	SRSF3
ENSG00000112096.19	SOD2
ENSG00000112110.10	MRPL18
ENSG00000112144.16	CILK1
ENSG00000112159.12	MDN1
ENSG00000112200.17	ZNF451
ENSG00000112208.11	BAG2
ENSG00000112218.9	GPR63
ENSG00000112234.9	FBXL4
ENSG00000112242.15	E2F3
ENSG00000112245.12	PTP4A1
ENSG00000112249.14	ASCC3
ENSG00000112290.13	WASF1
ENSG00000112306.8	RPS12
ENSG00000112308.13	C6orf62
ENSG00000112312.10	GMNN
ENSG00000112335.15	SNX3
ENSG00000112378.12	PERP
ENSG00000112406.5	HECA
ENSG00000112414.15	ADGRG6
ENSG00000112419.14	PHACTR2
ENSG00000112531.17	QKI
ENSG00000112624.12	BICRAL
ENSG00000112640.16	PPP2R5D
ENSG00000112655.16	PTK7
ENSG00000112658.8	SRF
ENSG00000112695.11	COX7A2
ENSG00000112697.17	TMEM30A
ENSG00000112715.25	VEGFA
ENSG00000112759.19	SLC29A1
ENSG00000112773.16	TENT5A
ENSG00000112787.13	FBRSL1
ENSG00000112851.15	ERBIN
ENSG00000112941.14	TENT4A
ENSG00000112996.11	MRPS30
ENSG00000113013.16	HSPA9
ENSG00000113048.17	MRPS27
ENSG00000113068.10	PFDN1
ENSG00000113070.8	HBEGF
ENSG00000113161.16	HMGCR
ENSG00000113163.18	CERT1
ENSG00000113194.13	FAF2
ENSG00000113269.14	RNF130
ENSG00000113282.14	CLINT1
ENSG00000113300.13	CNOT6
ENSG00000113328.19	CCNG1
ENSG00000113356.13	POLR3G
ENSG00000113384.14	GOLPH3
ENSG00000113387.12	SUB1
ENSG00000113391.19	FAM172A
ENSG00000113441.16	LNPEP
ENSG00000113552.16	GNPDA1
ENSG00000113558.19	SKP1
ENSG00000113569.16	NUP155
ENSG00000113575.10	PPP2CA
ENSG00000113580.15	NR3C1
ENSG00000113583.8	C5orf15
ENSG00000113615.13	SEC24A
ENSG00000113645.15	WWC1
ENSG00000113649.11	TCERG1
ENSG00000113658.18	SMAD5
ENSG00000113712.19	CSNK1A1
ENSG00000113719.16	ERGIC1
ENSG00000113732.9	ATP6V0E1
ENSG00000113739.10	STC2
ENSG00000114019.15	AMOTL2
ENSG00000114030.13	KPNA1
ENSG00000114054.14	PCCB
ENSG00000114062.22	UBE3A
ENSG00000114120.14	SLC25A36
ENSG00000114125.14	RNF7
ENSG00000114126.18	TFDP2
ENSG00000114209.15	PDCD10
ENSG00000114302.16	PRKAR2A
ENSG00000114353.17	GNAI2
ENSG00000114354.15	TFG
ENSG00000114416.18	FXR1
ENSG00000114439.19	BBX
ENSG00000114473.14	IQCG
ENSG00000114503.11	NCBP2
ENSG00000114544.17	SLC41A3
ENSG00000114573.10	ATP6V1A
ENSG00000114648.12	KLHL18
ENSG00000114686.9	MRPL3
ENSG00000114739.14	ACVR2B
ENSG00000114779.19	ABHD14B
ENSG00000114784.4	EIF1B
ENSG00000114850.7	SSR3
ENSG00000114857.18	NKTR
ENSG00000114867.22	EIF4G1
ENSG00000114902.14	SPCS1
ENSG00000114933.16	INO80D
ENSG00000114978.18	MOB1A
ENSG00000114982.19	KANSL3
ENSG00000114999.8	TTL
ENSG00000115053.17	NCL
ENSG00000115084.15	SLC35F5
ENSG00000115091.12	ACTR3
ENSG00000115107.20	STEAP3
ENSG00000115109.14	EPB41L5
ENSG00000115145.10	STAM2
ENSG00000115159.16	GPD2
ENSG00000115163.15	CENPA
ENSG00000115170.15	ACVR1
ENSG00000115183.15	TANC1
ENSG00000115207.13	GTF3C2
ENSG00000115233.12	PSMD14
ENSG00000115239.24	ASB3
ENSG00000115241.11	PPM1G
ENSG00000115290.10	GRB14
ENSG00000115306.16	SPTBN1
ENSG00000115310.18	RTN4
ENSG00000115364.14	MRPL19
ENSG00000115365.12	LANCL1
ENSG00000115415.20	STAT1
ENSG00000115464.15	USP34
ENSG00000115484.15	CCT4
ENSG00000115486.12	GGCX
ENSG00000115514.12	TXNDC9
ENSG00000115520.8	COQ10B
ENSG00000115524.17	SF3B1
ENSG00000115540.15	MOB4
ENSG00000115541.11	HSPE1
ENSG00000115561.16	CHMP3
ENSG00000115568.16	ZNF142
ENSG00000115641.19	FHL2
ENSG00000115677.17	HDLBP
ENSG00000115738.10	ID2
ENSG00000115758.13	ODC1
ENSG00000115760.14	BIRC6
ENSG00000115762.16	PLEKHB2
ENSG00000115806.13	GORASP2
ENSG00000115808.12	STRN
ENSG00000115816.15	CEBPZ
ENSG00000115839.18	RAB3GAP1
ENSG00000115841.21	RMDN2
ENSG00000115866.11	DARS1
ENSG00000115875.19	SRSF7
ENSG00000115884.11	SDC1
ENSG00000115904.14	SOS1
ENSG00000115946.8	PNO1
ENSG00000115947.14	ORC4
ENSG00000115963.13	RND3
ENSG00000115966.17	ATF2
ENSG00000115977.20	AAK1
ENSG00000116005.12	PCYOX1
ENSG00000116016.14	EPAS1
ENSG00000116017.11	ARID3A
ENSG00000116030.17	SUMO1
ENSG00000116044.16	NFE2L2
ENSG00000116095.11	PLEKHA3
ENSG00000116120.11	FARSB
ENSG00000116127.19	ALMS1
ENSG00000116128.11	BCL9
ENSG00000116133.13	DHCR24
ENSG00000116138.13	DNAJC16
ENSG00000116171.19	SCP2
ENSG00000116199.12	FAM20B
ENSG00000116209.12	TMEM59
ENSG00000116221.15	MRPL37
ENSG00000116237.16	ICMT
ENSG00000116251.11	RPL22
ENSG00000116273.6	PHF13
ENSG00000116285.13	ERRFI1
ENSG00000116288.13	PARK7
ENSG00000116406.19	EDEM3
ENSG00000116459.11	ATP5PB
ENSG00000116473.14	RAP1A
ENSG00000116478.12	HDAC1
ENSG00000116489.13	CAPZA1
ENSG00000116521.11	SCAMP3
ENSG00000116539.14	ASH1L
ENSG00000116580.18	GON4L
ENSG00000116604.18	MEF2D
ENSG00000116649.10	SRM
ENSG00000116679.16	IVNS1ABP
ENSG00000116688.18	MFN2
ENSG00000116698.21	SMG7
ENSG00000116729.14	WLS
ENSG00000116731.22	PRDM2
ENSG00000116745.7	RPE65
ENSG00000116747.13	RO60
ENSG00000116754.13	SRSF11
ENSG00000116871.15	MAP7D1
ENSG00000116922.14	C1orf109
ENSG00000116954.8	RRAGC
ENSG00000116977.19	LGALS8
ENSG00000117000.9	RLF
ENSG00000117036.12	ETV3
ENSG00000117054.14	ACADM
ENSG00000117133.11	RPF1
ENSG00000117139.18	KDM5B
ENSG00000117153.16	KLHL12
ENSG00000117155.17	SSX2IP
ENSG00000117174.11	ZNHIT6
ENSG00000117222.14	RBBP5
ENSG00000117335.20	CD46
ENSG00000117362.13	APH1A
ENSG00000117394.24	SLC2A1
ENSG00000117410.14	ATP6V0B
ENSG00000117411.17	B4GALT2
ENSG00000117450.15	PRDX1
ENSG00000117475.14	BLZF1
ENSG00000117479.15	SLC19A2
ENSG00000117481.10	NSUN4
ENSG00000117500.13	TMED5
ENSG00000117505.13	DR1
ENSG00000117519.16	CNN3
ENSG00000117523.16	PRRC2C
ENSG00000117592.9	PRDX6
ENSG00000117595.12	IRF6
ENSG00000117597.18	UTP25
ENSG00000117602.13	RCAN3
ENSG00000117620.15	SLC35A3
ENSG00000117632.23	STMN1
ENSG00000117640.18	MTFR1L
ENSG00000117682.17	DHDDS
ENSG00000117713.20	ARID1A
ENSG00000117751.18	PPP1R8
ENSG00000117859.19	OSBPL9
ENSG00000117862.13	TXNDC12
ENSG00000117868.17	ESYT2
ENSG00000117899.11	MESD
ENSG00000118007.13	STAG1
ENSG00000118058.23	KMT2A
ENSG00000118181.11	RPS25
ENSG00000118200.14	CAMSAP2
ENSG00000118217.6	ATF6
ENSG00000118242.16	MREG
ENSG00000118482.12	PHF3
ENSG00000118495.20	PLAGL1
ENSG00000118496.5	FBXO30
ENSG00000118564.15	FBXL5
ENSG00000118579.13	MED28
ENSG00000118596.12	SLC16A7
ENSG00000118680.14	MYL12B
ENSG00000118689.15	FOXO3
ENSG00000118705.17	RPN2
ENSG00000118707.11	TGIF2
ENSG00000118816.11	CCNI
ENSG00000118873.16	RAB3GAP2
ENSG00000118900.15	UBN1
ENSG00000118961.15	LDAH
ENSG00000118985.16	ELL2
ENSG00000119042.17	SATB2
ENSG00000119048.8	UBE2B
ENSG00000119231.11	SENP5
ENSG00000119280.17	C1orf198
ENSG00000119285.11	HEATR1
ENSG00000119314.16	PTBP3
ENSG00000119318.13	RAD23B
ENSG00000119328.12	ABITRAM
ENSG00000119335.17	SET
ENSG00000119383.20	PTPA
ENSG00000119396.11	RAB14
ENSG00000119401.11	TRIM32
ENSG00000119402.17	FBXW2
ENSG00000119408.17	NEK6
ENSG00000119414.12	PPP6C
ENSG00000119421.7	NDUFA8
ENSG00000119446.14	RBM18
ENSG00000119487.17	MAPKAP1
ENSG00000119523.10	ALG2
ENSG00000119537.18	KDSR
ENSG00000119541.10	VPS4B
ENSG00000119596.18	YLPM1
ENSG00000119616.11	FCF1
ENSG00000119655.11	NPC2
ENSG00000119669.5	IRF2BPL
ENSG00000119682.17	AREL1
ENSG00000119689.15	DLST
ENSG00000119705.10	SLIRP
ENSG00000119729.12	RHOQ
ENSG00000119760.16	SUPT7L
ENSG00000119771.15	KLHL29
ENSG00000119777.20	TMEM214
ENSG00000119787.14	ATL2
ENSG00000119812.19	FAM98A
ENSG00000119820.11	YIPF4
ENSG00000119888.11	EPCAM
ENSG00000119899.13	SLC17A5
ENSG00000119929.13	CUTC
ENSG00000119950.21	MXI1
ENSG00000119953.14	SMNDC1
ENSG00000119969.15	HELLS
ENSG00000119977.21	TCTN3
ENSG00000119979.18	DENND10
ENSG00000120053.12	GOT1
ENSG00000120063.10	GNA13
ENSG00000120071.15	KANSL1
ENSG00000120093.11	HOXB3
ENSG00000120137.7	PANK3
ENSG00000120158.12	RCL1
ENSG00000120253.14	NUP43
ENSG00000120254.16	MTHFD1L
ENSG00000120265.18	PCMT1
ENSG00000120306.11	CYSTM1
ENSG00000120314.18	WDR55
ENSG00000120437.9	ACAT2
ENSG00000120438.12	TCP1
ENSG00000120685.20	PROSER1
ENSG00000120690.16	ELF1
ENSG00000120694.20	HSPH1
ENSG00000120705.13	ETF1
ENSG00000120709.11	FAM53C
ENSG00000120725.13	SIL1
ENSG00000120727.13	PAIP2
ENSG00000120733.14	KDM3B
ENSG00000120738.8	EGR1
ENSG00000120742.11	SERP1
ENSG00000120756.13	PLS1
ENSG00000120802.14	TMPO
ENSG00000120805.14	ARL1
ENSG00000120820.12	GLT8D2
ENSG00000120875.9	DUSP4
ENSG00000120889.13	TNFRSF10B
ENSG00000120948.18	TARDBP
ENSG00000120963.12	ZNF706
ENSG00000120992.18	LYPLA1
ENSG00000121057.13	AKAP1
ENSG00000121060.18	TRIM25
ENSG00000121073.15	SLC35B1
ENSG00000121274.14	TENT4B
ENSG00000121281.13	ADCY7
ENSG00000121380.12	BCL2L14
ENSG00000121454.6	LHX4
ENSG00000121579.13	NAA50
ENSG00000121644.19	DESI2
ENSG00000121743.4	GJA3
ENSG00000121774.18	KHDRBS1
ENSG00000121775.18	TMEM39B
ENSG00000121864.10	ZNF639
ENSG00000121892.15	PDS5A
ENSG00000121988.18	ZRANB3
ENSG00000122012.14	SV2C
ENSG00000122042.10	UBL3
ENSG00000122068.13	FYTTD1
ENSG00000122203.15	KIAA1191
ENSG00000122218.16	COPA
ENSG00000122257.20	RBBP6
ENSG00000122359.18	ANXA11
ENSG00000122390.19	NAA60
ENSG00000122406.14	RPL5
ENSG00000122482.21	ZNF644
ENSG00000122484.9	RPAP2
ENSG00000122515.15	ZMIZ2
ENSG00000122545.20	SEPTIN7
ENSG00000122565.19	CBX3
ENSG00000122566.22	HNRNPA2B1
ENSG00000122574.11	WIPF3
ENSG00000122674.12	CCZ1
ENSG00000122687.19	MRM2
ENSG00000122692.9	SMU1
ENSG00000122696.14	SLC25A51
ENSG00000122705.17	CLTA
ENSG00000122729.19	ACO1
ENSG00000122741.16	DCAF10
ENSG00000122783.17	CYREN
ENSG00000122786.20	CALD1
ENSG00000122863.6	CHST3
ENSG00000122958.15	VPS26A
ENSG00000123066.9	MED13L
ENSG00000123091.5	RNF11
ENSG00000123124.14	WWP1
ENSG00000123154.12	WDR83
ENSG00000123178.15	SPRYD7
ENSG00000123179.14	EBPL
ENSG00000123200.17	ZC3H13
ENSG00000123268.9	ATF1
ENSG00000123352.18	SPATS2
ENSG00000123358.20	NR4A1
ENSG00000123416.15	TUBA1B
ENSG00000123472.12	ATPAF1
ENSG00000123505.19	AMD1
ENSG00000123562.18	MORF4L2
ENSG00000123575.9	FAM199X
ENSG00000123600.20	METTL8
ENSG00000123636.18	BAZ2B
ENSG00000123684.13	LPGAT1
ENSG00000123728.10	RAP2C
ENSG00000123739.11	PLA2G12A
ENSG00000123892.12	RAB38
ENSG00000123908.12	AGO2
ENSG00000123933.17	MXD4
ENSG00000123975.5	CKS2
ENSG00000123983.14	ACSL3
ENSG00000123989.14	CHPF
ENSG00000124091.9	GCNT7
ENSG00000124098.10	FAM210B
ENSG00000124103.10	FAM209A
ENSG00000124145.6	SDC4
ENSG00000124151.19	NCOA3
ENSG00000124155.18	PIGT
ENSG00000124160.12	NCOA5
ENSG00000124164.16	VAPB
ENSG00000124171.9	PARD6B
ENSG00000124172.10	ATP5F1E
ENSG00000124177.15	CHD6
ENSG00000124193.16	SRSF6
ENSG00000124198.9	ARFGEF2
ENSG00000124201.15	ZNFX1
ENSG00000124207.17	CSE1L
ENSG00000124208.16	PEDS1-UBE2V1
ENSG00000124209.4	RAB22A
ENSG00000124214.20	STAU1
ENSG00000124226.11	RNF114
ENSG00000124275.15	MTRR
ENSG00000124333.16	VAMP7
ENSG00000124333.16_PAR_Y	VAMP7
ENSG00000124380.11	SNRNP27
ENSG00000124422.12	USP22
ENSG00000124486.13	USP9X
ENSG00000124541.7	RRP36
ENSG00000124571.18	XPO5
ENSG00000124593.16	AL365205.1
ENSG00000124596.17	OARD1
ENSG00000124641.16	MED20
ENSG00000124733.5	MEA1
ENSG00000124749.17	COL21A1
ENSG00000124762.14	CDKN1A
ENSG00000124766.7	SOX4
ENSG00000124767.7	GLO1
ENSG00000124782.20	RREB1
ENSG00000124783.14	SSR1
ENSG00000124789.12	NUP153
ENSG00000124795.17	DEK
ENSG00000124831.19	LRRFIP1
ENSG00000124882.4	EREG
ENSG00000124920.14	MYRF
ENSG00000125107.18	CNOT1
ENSG00000125124.13	BBS2
ENSG00000125166.13	GOT2
ENSG00000125249.7	RAP2A
ENSG00000125304.10	TM9SF2
ENSG00000125378.16	BMP4
ENSG00000125398.8	SOX9
ENSG00000125445.11	MRPS7
ENSG00000125484.12	GTF3C4
ENSG00000125534.10	PPDPF
ENSG00000125618.17	PAX8
ENSG00000125630.16	POLR1B
ENSG00000125648.15	SLC25A23
ENSG00000125651.14	GTF2F1
ENSG00000125686.12	MED1
ENSG00000125691.14	RPL23
ENSG00000125695.12	AC046185.1
ENSG00000125733.18	TRIP10
ENSG00000125741.5	OPA3
ENSG00000125753.14	VASP
ENSG00000125772.14	GPCPD1
ENSG00000125779.22	PANK2
ENSG00000125818.18	PSMF1
ENSG00000125826.21	RBCK1
ENSG00000125834.13	STK35
ENSG00000125835.19	SNRPB
ENSG00000125844.16	RRBP1
ENSG00000125863.20	MKKS
ENSG00000125868.16	DSTN
ENSG00000125875.14	TBC1D20
ENSG00000125944.21	HNRNPR
ENSG00000125952.20	MAX
ENSG00000125954.12	CHURC1-FNTB
ENSG00000125968.9	ID1
ENSG00000125970.12	RALY
ENSG00000125971.17	DYNLRB1
ENSG00000125977.7	EIF2S2
ENSG00000126003.7	PLAGL2
ENSG00000126012.12	KDM5C
ENSG00000126067.12	PSMB2
ENSG00000126070.20	AGO3
ENSG00000126106.14	TMEM53
ENSG00000126247.11	CAPNS1
ENSG00000126261.13	UBA2
ENSG00000126368.6	NR1D1
ENSG00000126457.22	PRMT1
ENSG00000126458.4	RRAS
ENSG00000126464.14	PRR12
ENSG00000126524.10	SBDS
ENSG00000126581.13	BECN1
ENSG00000126698.11	DNAJC8
ENSG00000126705.15	AHDC1
ENSG00000126746.17	ZNF384
ENSG00000126749.16	EMG1
ENSG00000126767.18	ELK1
ENSG00000126773.13	PCNX4
ENSG00000126775.9	ATG14
ENSG00000126777.18	KTN1
ENSG00000126858.18	RHOT1
ENSG00000126878.13	AIF1L
ENSG00000126945.9	HNRNPH2
ENSG00000127022.15	CANX
ENSG00000127080.10	IPPK
ENSG00000127184.13	COX7C
ENSG00000127314.18	RAP1B
ENSG00000127329.16	PTPRB
ENSG00000127334.11	DYRK2
ENSG00000127418.15	FGFRL1
ENSG00000127423.11	AUNIP
ENSG00000127483.19	HP1BP3
ENSG00000127526.15	SLC35E1
ENSG00000127527.14	EPS15L1
ENSG00000127530.4	OR7C1
ENSG00000127540.12	UQCR11
ENSG00000127666.10	TICAM1
ENSG00000127804.13	METTL16
ENSG00000127838.14	PNKD
ENSG00000127870.17	RNF6
ENSG00000127946.17	HIP1
ENSG00000127947.16	PTPN12
ENSG00000127955.17	GNAI1
ENSG00000128016.7	ZFP36
ENSG00000128050.9	PAICS
ENSG00000128059.8	PPAT
ENSG00000128245.15	YWHAH
ENSG00000128272.15	ATF4
ENSG00000128283.7	CDC42EP1
ENSG00000128340.15	RAC2
ENSG00000128342.5	LIF
ENSG00000128394.17	APOBEC3F
ENSG00000128463.13	EMC4
ENSG00000128510.12	CPA4
ENSG00000128567.17	PODXL
ENSG00000128585.18	MKLN1
ENSG00000128595.17	CALU
ENSG00000128607.14	KLHDC10
ENSG00000128789.21	PSMG2
ENSG00000128791.12	TWSG1
ENSG00000128829.12	EIF2AK4
ENSG00000128973.13	CLN6
ENSG00000128989.11	ARPP19
ENSG00000129055.13	ANAPC13
ENSG00000129083.13	COPB1
ENSG00000129084.18	PSMA1
ENSG00000129103.19	SUMF2
ENSG00000129116.19	PALLD
ENSG00000129128.13	SPCS3
ENSG00000129187.14	DCTD
ENSG00000129197.14	RPAIN
ENSG00000129250.12	KIF1C
ENSG00000129255.16	MPDU1
ENSG00000129315.11	CCNT1
ENSG00000129351.17	ILF3
ENSG00000129422.14	MTUS1
ENSG00000129472.15	RAB2B
ENSG00000129474.16	AJUBA
ENSG00000129515.20	SNX6
ENSG00000129518.9	EAPP
ENSG00000129559.13	NEDD8
ENSG00000129562.11	DAD1
ENSG00000129625.13	REEP5
ENSG00000129636.13	ITFG1
ENSG00000129657.16	SEC14L1
ENSG00000129667.13	RHBDF2
ENSG00000129696.13	TTI2
ENSG00000129933.21	MAU2
ENSG00000129993.15	CBFA2T3
ENSG00000130021.15	PUDP
ENSG00000130024.15	PHF10
ENSG00000130038.10	CRACR2A
ENSG00000130054.5	FAM155B
ENSG00000130066.16	SAT1
ENSG00000130119.17	GNL3L
ENSG00000130147.16	SH3BP4
ENSG00000130164.14	LDLR
ENSG00000130167.14	TSPAN16
ENSG00000130175.10	PRKCSH
ENSG00000130227.17	XPO7
ENSG00000130305.17	NSUN5
ENSG00000130309.11	COLGALT1
ENSG00000130338.13	TULP4
ENSG00000130340.16	SNX9
ENSG00000130382.9	MLLT1
ENSG00000130402.13	ACTN4
ENSG00000130513.6	GDF15
ENSG00000130520.11	LSM4
ENSG00000130522.6	JUND
ENSG00000130544.12	ZNF557
ENSG00000130559.19	CAMSAP1
ENSG00000130699.18	TAF4
ENSG00000130713.16	EXOSC2
ENSG00000130723.21	PRRC2B
ENSG00000130726.12	TRIM28
ENSG00000130733.11	YIPF2
ENSG00000130741.11	EIF2S3
ENSG00000130749.10	ZC3H4
ENSG00000130764.10	LRRC47
ENSG00000130766.5	SESN2
ENSG00000130779.21	CLIP1
ENSG00000130803.15	ZNF317
ENSG00000130816.17	DNMT1
ENSG00000130821.17	SLC6A8
ENSG00000130826.18	DKC1
ENSG00000130935.10	NOL11
ENSG00000130958.13	SLC35D2
ENSG00000130962.18	PRRG1
ENSG00000130985.17	UBA1
ENSG00000131016.17	AKAP12
ENSG00000131019.11	ULBP3
ENSG00000131023.13	LATS1
ENSG00000131043.12	AAR2
ENSG00000131051.24	RBM39
ENSG00000131100.13	ATP6V1E1
ENSG00000131115.16	ZNF227
ENSG00000131126.19	TEX101
ENSG00000131127.14	ZNF141
ENSG00000131148.9	EMC8
ENSG00000131149.19	GSE1
ENSG00000131152.4	AC010531.1
ENSG00000131165.16	CHMP1A
ENSG00000131171.13	SH3BGRL
ENSG00000131236.18	CAP1
ENSG00000131238.18	PPT1
ENSG00000131263.13	RLIM
ENSG00000131323.16	TRAF3
ENSG00000131355.15	ADGRE3
ENSG00000131368.8	MRPS25
ENSG00000131374.14	TBC1D5
ENSG00000131381.12	RBSN
ENSG00000131389.17	SLC6A6
ENSG00000131462.8	TUBG1
ENSG00000131467.11	PSME3
ENSG00000131469.15	RPL27
ENSG00000131470.15	PSMC3IP
ENSG00000131473.17	ACLY
ENSG00000131503.21	ANKHD1
ENSG00000131504.17	DIAPH1
ENSG00000131507.11	NDFIP1
ENSG00000131508.16	UBE2D2
ENSG00000131653.13	TRAF7
ENSG00000131669.10	NINJ1
ENSG00000131724.11	IL13RA1
ENSG00000131759.18	RARA
ENSG00000131773.14	KHDRBS3
ENSG00000131791.8	PRKAB2
ENSG00000131828.14	PDHA1
ENSG00000131844.16	MCCC2
ENSG00000131871.15	SELENOS
ENSG00000131873.7	CHSY1
ENSG00000132002.9	DNAJB1
ENSG00000132155.13	RAF1
ENSG00000132170.23	PPARG
ENSG00000132254.13	ARFIP2
ENSG00000132256.19	TRIM5
ENSG00000132286.12	TIMM10B
ENSG00000132294.15	EFR3A
ENSG00000132305.21	IMMT
ENSG00000132313.15	MRPL35
ENSG00000132341.12	RAN
ENSG00000132356.11	PRKAA1
ENSG00000132359.15	RAP1GAP2
ENSG00000132383.12	RPA1
ENSG00000132388.12	UBE2G1
ENSG00000132405.19	TBC1D14
ENSG00000132463.14	GRSF1
ENSG00000132466.19	ANKRD17
ENSG00000132471.12	WBP2
ENSG00000132475.10	H3-3B
ENSG00000132485.14	ZRANB2
ENSG00000132507.18	EIF5A
ENSG00000132510.10	KDM6B
ENSG00000132522.16	GPS2
ENSG00000132570.15	PCBD2
ENSG00000132589.16	FLOT2
ENSG00000132603.15	NIP7
ENSG00000132604.11	TERF2
ENSG00000132612.16	VPS4A
ENSG00000132640.15	BTBD3
ENSG00000132664.12	POLR3F
ENSG00000132680.11	KHDC4
ENSG00000132692.19	BCAN
ENSG00000132698.15	RAB25
ENSG00000132763.15	MMACHC
ENSG00000132768.14	DPH2
ENSG00000132819.17	RBM38
ENSG00000132824.14	SERINC3
ENSG00000132846.6	ZBED3
ENSG00000132912.13	DCTN4
ENSG00000132915.11	PDE6A
ENSG00000132952.12	USPL1
ENSG00000132953.16	XPO4
ENSG00000132963.8	POMP
ENSG00000132964.12	CDK8
ENSG00000133026.13	MYH10
ENSG00000133030.22	MPRIP
ENSG00000133065.11	SLC41A1
ENSG00000133112.17	TPT1
ENSG00000133119.13	RFC3
ENSG00000133193.12	FAM104A
ENSG00000133195.11	SLC39A11
ENSG00000133226.17	SRRM1
ENSG00000133243.10	BTBD2
ENSG00000133318.14	RTN3
ENSG00000133393.13	CEP20
ENSG00000133477.17	FAM83F
ENSG00000133606.11	MKRN1
ENSG00000133641.18	C12orf29
ENSG00000133657.16	ATP13A3
ENSG00000133703.13	KRAS
ENSG00000133731.10	IMPA1
ENSG00000133789.15	SWAP70
ENSG00000133812.16	SBF2
ENSG00000133816.17	MICAL2
ENSG00000133818.14	RRAS2
ENSG00000133872.14	SARAF
ENSG00000133884.10	DPF2
ENSG00000133895.17	MEN1
ENSG00000133961.20	NUMB
ENSG00000133983.16	COX16
ENSG00000134001.15	EIF2S1
ENSG00000134014.17	ELP3
ENSG00000134046.12	MBD2
ENSG00000134049.6	IER3IP1
ENSG00000134077.16	THUMPD3
ENSG00000134086.8	VHL
ENSG00000134108.14	ARL8B
ENSG00000134247.10	PTGFRN
ENSG00000134250.20	NOTCH2
ENSG00000134255.14	CEPT1
ENSG00000134265.13	NAPG
ENSG00000134278.15	SPIRE1
ENSG00000134283.18	PPHLN1
ENSG00000134287.10	ARF3
ENSG00000134294.14	SLC38A2
ENSG00000134308.14	YWHAQ
ENSG00000134318.14	ROCK2
ENSG00000134333.14	LDHA
ENSG00000134352.20	IL6ST
ENSG00000134371.14	CDC73
ENSG00000134375.11	TIMM17A
ENSG00000134419.15	RPS15A
ENSG00000134440.12	NARS1
ENSG00000134504.14	KCTD1
ENSG00000134590.14	RTL8C
ENSG00000134602.16	STK26
ENSG00000134644.16	PUM1
ENSG00000134684.11	YARS1
ENSG00000134686.18	PHC2
ENSG00000134717.18	BTF3L4
ENSG00000134744.14	TUT4
ENSG00000134748.13	PRPF38A
ENSG00000134755.17	DSC2
ENSG00000134758.14	RNF138
ENSG00000134779.15	TPGS2
ENSG00000134824.14	FADS2
ENSG00000134825.16	TMEM258
ENSG00000134851.13	TMEM165
ENSG00000134852.15	CLOCK
ENSG00000134882.16	UBAC2
ENSG00000134884.15	ARGLU1
ENSG00000134909.18	ARHGAP32
ENSG00000134910.14	STT3A
ENSG00000134970.14	TMED7
ENSG00000134982.17	APC
ENSG00000134987.11	WDR36
ENSG00000135002.12	RFK
ENSG00000135018.14	UBQLN1
ENSG00000135046.14	ANXA1
ENSG00000135052.16	GOLM1
ENSG00000135069.14	PSAT1
ENSG00000135070.15	ISCA1
ENSG00000135074.16	ADAM19
ENSG00000135090.14	TAOK3
ENSG00000135108.15	FBXO21
ENSG00000135119.15	RNFT2
ENSG00000135164.19	DMTF1
ENSG00000135250.17	SRPK2
ENSG00000135269.18	TES
ENSG00000135314.12	KHDC1
ENSG00000135316.19	SYNCRIP
ENSG00000135318.12	NT5E
ENSG00000135341.18	MAP3K7
ENSG00000135365.16	PHF21A
ENSG00000135373.13	EHF
ENSG00000135378.4	PRRG4
ENSG00000135387.21	CAPRIN1
ENSG00000135390.21	ATP5MC2
ENSG00000135446.17	CDK4
ENSG00000135452.10	TSPAN31
ENSG00000135454.14	B4GALNT1
ENSG00000135486.19	HNRNPA1
ENSG00000135503.13	ACVR1B
ENSG00000135535.17	CD164
ENSG00000135632.12	SMYD5
ENSG00000135677.11	GNS
ENSG00000135678.12	CPM
ENSG00000135679.25	MDM2
ENSG00000135686.13	KLHL36
ENSG00000135720.13	DYNC1LI2
ENSG00000135749.19	PCNX2
ENSG00000135766.9	EGLN1
ENSG00000135778.12	NTPCR
ENSG00000135801.10	TAF5L
ENSG00000135821.19	GLUL
ENSG00000135823.14	STX6
ENSG00000135837.16	CEP350
ENSG00000135862.6	LAMC1
ENSG00000135870.12	RC3H1
ENSG00000135916.16	ITM2C
ENSG00000135926.15	TMBIM1
ENSG00000135930.14	EIF4E2
ENSG00000135932.11	CAB39
ENSG00000135956.9	TMEM127
ENSG00000135966.13	TGFBRAP1
ENSG00000135974.10	C2orf49
ENSG00000135999.12	EPC2
ENSG00000136003.16	ISCU
ENSG00000136021.19	SCYL2
ENSG00000136045.12	PWP1
ENSG00000136048.14	DRAM1
ENSG00000136100.14	VPS36
ENSG00000136108.15	CKAP2
ENSG00000136111.14	TBC1D4
ENSG00000136114.17	THSD1
ENSG00000136143.16	SUCLA2
ENSG00000136159.4	NUDT15
ENSG00000136193.17	SCRN1
ENSG00000136231.14	IGF2BP3
ENSG00000136238.18	RAC1
ENSG00000136240.10	KDELR2
ENSG00000136247.15	ZDHHC4
ENSG00000136261.15	BZW2
ENSG00000136273.13	HUS1
ENSG00000136295.15	TTYH3
ENSG00000136305.11	CIDEB
ENSG00000136319.12	TTC5
ENSG00000136379.12	ABHD17C
ENSG00000136381.13	IREB2
ENSG00000136436.15	CALCOCO2
ENSG00000136444.10	RSAD1
ENSG00000136448.13	NMT1
ENSG00000136450.13	SRSF1
ENSG00000136451.9	VEZF1
ENSG00000136478.8	TEX2
ENSG00000136485.15	DCAF7
ENSG00000136504.13	KAT7
ENSG00000136527.18	TRA2B
ENSG00000136536.15	MARCHF7
ENSG00000136560.14	TANK
ENSG00000136628.18	EPRS1
ENSG00000136636.13	KCTD3
ENSG00000136699.19	SMPD4
ENSG00000136709.12	WDR33
ENSG00000136715.19	SAP130
ENSG00000136718.10	IMP4
ENSG00000136720.7	HS6ST1
ENSG00000136738.15	STAM
ENSG00000136754.18	ABI1
ENSG00000136758.19	YME1L1
ENSG00000136802.12	LRRC8A
ENSG00000136807.14	CDK9
ENSG00000136810.13	TXN
ENSG00000136819.15	C9orf78
ENSG00000136826.15	KLF4
ENSG00000136830.12	NIBAN2
ENSG00000136842.14	TMOD1
ENSG00000136854.24	STXBP1
ENSG00000136868.11	SLC31A1
ENSG00000136874.11	STX17
ENSG00000136875.13	PRPF4
ENSG00000136891.14	TEX10
ENSG00000136897.8	MRPL50
ENSG00000136908.18	DPM2
ENSG00000136925.15	TSTD2
ENSG00000136930.13	PSMB7
ENSG00000136938.9	ANP32B
ENSG00000136942.15	RPL35
ENSG00000136944.19	LMX1B
ENSG00000136986.10	DERL1
ENSG00000136997.21	MYC
ENSG00000137073.23	UBAP2
ENSG00000137074.20	APTX
ENSG00000137075.18	RNF38
ENSG00000137124.8	ALDH1B1
ENSG00000137154.13	RPS6
ENSG00000137166.16	FOXP4
ENSG00000137168.8	PPIL1
ENSG00000137207.12	YIPF3
ENSG00000137216.19	TMEM63B
ENSG00000137266.15	SLC22A23
ENSG00000137269.15	LRRC1
ENSG00000137309.20	HMGA1
ENSG00000137409.19	MTCH1
ENSG00000137414.6	FAM8A1
ENSG00000137486.17	ARRB1
ENSG00000137492.8	THAP12
ENSG00000137504.14	CREBZF
ENSG00000137509.11	PRCP
ENSG00000137547.9	MRPL15
ENSG00000137575.12	SDCBP
ENSG00000137693.14	YAP1
[truncated: 2,392 more rows]

## Sheet: RNase_I_005_0025
#HCT116, PAR-CLIP, RNase I, in-lysate 0.05 U/μL, on-bead 0.025 U/μL, this study
ENSEMBL	SYMBOL
ENSG00000001084.13	GCLC
ENSG00000001167.14	NFYA
ENSG00000001630.17	CYP51A1
ENSG00000002587.10	HS3ST1
ENSG00000002745.13	WNT16
ENSG00000002834.18	LASP1
ENSG00000003056.8	M6PR
ENSG00000003249.15	DBNDD1
ENSG00000003402.20	CFLAR
ENSG00000003436.16	TFPI
ENSG00000004142.12	POLDIP2
ENSG00000004455.17	AK2
ENSG00000004478.8	FKBP4
ENSG00000004897.12	CDC27
ENSG00000004961.15	HCCS
ENSG00000005022.6	SLC25A5
ENSG00000005100.13	DHX33
ENSG00000005187.12	ACSM3
ENSG00000005194.15	CIAPIN1
ENSG00000005436.14	GCFC2
ENSG00000005483.21	KMT2E
ENSG00000005486.17	RHBDD2
ENSG00000005893.16	LAMP2
ENSG00000006007.12	GDE1
ENSG00000006016.11	CRLF1
ENSG00000006125.18	AP2B1
ENSG00000006327.14	TNFRSF12A
ENSG00000006451.8	RALA
ENSG00000006453.14	BAIAP2L1
ENSG00000006468.14	ETV1
ENSG00000006695.12	COX10
ENSG00000006831.10	ADIPOR2
ENSG00000007047.15	MARK4
ENSG00000007168.14	PAFAH1B1
ENSG00000007202.15	KIAA0100
ENSG00000008282.9	SYPL1
ENSG00000008283.16	CYB561
ENSG00000008324.12	SS18L2
ENSG00000008394.13	MGST1
ENSG00000008952.17	SEC62
ENSG00000008988.11	RPS20
ENSG00000009307.16	CSDE1
ENSG00000009335.18	UBE3C
ENSG00000009413.16	REV3L
ENSG00000009844.16	VTA1
ENSG00000010244.19	ZNF207
ENSG00000010270.14	STARD3NL
ENSG00000010404.18	IDS
ENSG00000011007.12	ELOA
ENSG00000011052.21	NME1-NME2
ENSG00000011114.15	BTBD7
ENSG00000011295.16	TTC19
ENSG00000011304.22	PTBP1
ENSG00000011405.13	PIK3C2A
ENSG00000012174.12	MBTPS2
ENSG00000012211.13	PRICKLE3
ENSG00000012232.9	EXTL3
ENSG00000012660.14	ELOVL5
ENSG00000012963.15	UBR7
ENSG00000013306.16	SLC25A39
ENSG00000013588.9	GPRC5A
ENSG00000014919.13	COX15
ENSG00000015475.19	BID
ENSG00000015479.20	MATR3
ENSG00000015676.18	NUDCD3
ENSG00000017797.13	RALBP1
ENSG00000018408.15	WWTR1
ENSG00000019186.10	CYP24A1
ENSG00000023041.11	ZDHHC6
ENSG00000023191.17	RNH1
ENSG00000023516.9	AKAP11
ENSG00000023572.10	GLRX2
ENSG00000023734.11	STRAP
ENSG00000023909.10	GCLM
ENSG00000024422.12	EHD2
ENSG00000025800.14	KPNA6
ENSG00000026103.22	FAS
ENSG00000026508.20	CD44
ENSG00000029363.17	BCLAF1
ENSG00000029364.12	SLC39A9
ENSG00000029725.17	RABEP1
ENSG00000031003.10	FAM13B
ENSG00000031698.13	SARS1
ENSG00000033050.9	ABCF2
ENSG00000033170.17	FUT8
ENSG00000034152.19	MAP2K3
ENSG00000034510.6	TMSB10
ENSG00000034713.8	GABARAPL2
ENSG00000035403.18	VCL
ENSG00000035862.12	TIMP2
ENSG00000036549.13	ZZZ3
ENSG00000037749.12	MFAP3
ENSG00000038274.17	MAT2B
ENSG00000038427.16	VCAN
ENSG00000040531.16	CTNS
ENSG00000041357.16	PSMA4
ENSG00000043093.15	DCUN1D1
ENSG00000044115.21	CTNNA1
ENSG00000044574.8	HSPA5
ENSG00000046604.13	DSG2
ENSG00000047648.23	ARHGAP6
ENSG00000047849.21	MAP4
ENSG00000047932.14	GOPC
ENSG00000048392.12	RRM2B
ENSG00000048405.10	ZNF800
ENSG00000048544.6	MRPS10
ENSG00000048828.17	FAM120A
ENSG00000048991.16	R3HDM1
ENSG00000049130.16	KITLG
ENSG00000049245.13	VAMP3
ENSG00000049449.10	RCN1
ENSG00000049656.14	CLPTM1L
ENSG00000050130.18	JKAMP
ENSG00000050393.11	MCUR1
ENSG00000050426.16	LETMD1
ENSG00000051825.15	MPHOSPH9
ENSG00000052723.12	SIKE1
ENSG00000053254.16	FOXN3
ENSG00000054116.12	TRAPPC3
ENSG00000054598.9	FOXC1
ENSG00000054690.14	PLEKHH1
ENSG00000055070.17	SZRD1
ENSG00000055130.17	CUL1
ENSG00000055163.20	CYFIP2
ENSG00000055208.19	TAB2
ENSG00000055332.18	EIF2AK2
ENSG00000055609.19	KMT2C
ENSG00000055917.16	PUM2
ENSG00000056097.16	ZFR
ENSG00000056277.16	ZNF280C
ENSG00000056586.16	RC3H2
ENSG00000057019.16	DCBLD2
ENSG00000057608.17	GDI2
ENSG00000057663.16	ATG5
ENSG00000058262.10	SEC61A1
ENSG00000058272.19	PPP1R12A
ENSG00000058673.17	ZC3H11A
ENSG00000058804.12	NDC1
ENSG00000059728.11	MXD1
ENSG00000060138.13	YBX3
ENSG00000060237.18	WNK1
ENSG00000060339.14	CCAR1
ENSG00000060749.16	QSER1
ENSG00000061676.15	NCKAP1
ENSG00000061794.13	MRPS35
ENSG00000062194.16	GPBP1
ENSG00000062485.19	CS
ENSG00000062716.13	VMP1
ENSG00000063046.18	EIF4B
ENSG00000063244.13	U2AF2
ENSG00000063587.15	ZNF275
ENSG00000063601.17	MTMR1
ENSG00000063660.9	GPC1
ENSG00000063978.16	RNF4
ENSG00000064115.11	TM7SF3
ENSG00000064225.12	ST3GAL6
ENSG00000064313.12	TAF2
ENSG00000064393.16	HIPK2
ENSG00000064419.13	TNPO3
ENSG00000064651.14	SLC12A2
ENSG00000064666.15	CNN2
ENSG00000064726.10	BTBD1
ENSG00000065000.19	AP3D1
ENSG00000065060.17	UHRF1BP1
ENSG00000065135.12	GNAI3
ENSG00000065150.21	IPO5
ENSG00000065308.5	TRAM2
ENSG00000065328.17	MCM10
ENSG00000065427.15	KARS1
ENSG00000065526.12	SPEN
ENSG00000065559.15	MAP2K4
ENSG00000065621.15	GSTO2
ENSG00000065665.21	SEC61A2
ENSG00000065911.13	MTHFD2
ENSG00000065970.9	FOXJ2
ENSG00000065978.19	YBX1
ENSG00000066027.12	PPP2R5A
ENSG00000066032.18	CTNNA2
ENSG00000066044.15	ELAVL1
ENSG00000066117.15	SMARCD1
ENSG00000066136.20	NFYC
ENSG00000066322.15	ELOVL1
ENSG00000066427.24	ATXN3
ENSG00000066654.14	THUMPD1
ENSG00000066855.16	MTFR1
ENSG00000066926.12	FECH
ENSG00000067082.15	KLF6
ENSG00000067113.17	PLPP1
ENSG00000067167.8	TRAM1
ENSG00000067177.15	PHKA1
ENSG00000067182.8	TNFRSF1A
ENSG00000067225.18	PKM
ENSG00000067369.14	TP53BP1
ENSG00000067533.6	RRP15
ENSG00000067560.13	RHOA
ENSG00000067715.14	SYT1
ENSG00000067955.15	CBFB
ENSG00000068305.17	MEF2A
ENSG00000068489.13	PRR11
ENSG00000068650.18	ATP11A
ENSG00000068654.16	POLR1A
ENSG00000068697.7	LAPTM4A
ENSG00000068796.19	KIF2A
ENSG00000068878.15	PSME4
ENSG00000068912.14	ERLEC1
ENSG00000069275.13	NUCKS1
ENSG00000069329.18	VPS35
ENSG00000069345.12	DNAJA2
ENSG00000069849.11	ATP1B3
ENSG00000069956.12	MAPK6
ENSG00000070087.14	PFN2
ENSG00000070367.16	EXOC5
ENSG00000070614.15	NDST1
ENSG00000070718.12	AP3M2
ENSG00000070756.17	PABPC1
ENSG00000070761.8	CFAP20
ENSG00000070770.10	CSNK2A2
ENSG00000070831.17	CDC42
ENSG00000070882.13	OSBPL3
ENSG00000071054.16	MAP4K4
ENSG00000071082.11	RPL31
ENSG00000071127.17	WDR1
ENSG00000071564.17	TCF3
ENSG00000071626.17	DAZAP1
ENSG00000071994.11	PDCD2
ENSG00000072042.13	RDH11
ENSG00000072071.16	ADGRL1
ENSG00000072110.15	ACTN1
ENSG00000072210.19	ALDH3A2
ENSG00000072274.13	TFRC
ENSG00000072364.13	AFF4
ENSG00000072401.15	UBE2D1
ENSG00000072501.19	SMC1A
ENSG00000072571.20	HMMR
ENSG00000072609.18	CHFR
ENSG00000072736.19	NFATC3
ENSG00000072803.17	FBXW11
ENSG00000072864.16	NDE1
ENSG00000072958.9	AP1M1
ENSG00000073008.15	PVR
ENSG00000073584.20	SMARCE1
ENSG00000073792.16	IGF2BP2
ENSG00000073803.14	MAP3K13
ENSG00000073969.18	NSF
ENSG00000074201.9	CLNS1A
ENSG00000074211.14	PPP2R2C
ENSG00000074319.13	TSG101
ENSG00000074695.6	LMAN1
ENSG00000074696.13	HACD3
ENSG00000074800.16	ENO1
ENSG00000075043.19	KCNQ2
ENSG00000075336.12	TIMM21
ENSG00000075407.18	ZNF37A
ENSG00000075415.13	SLC25A3
ENSG00000075568.17	TMEM131
ENSG00000075618.18	FSCN1
ENSG00000075624.17	ACTB
ENSG00000075711.21	DLG1
ENSG00000075785.14	RAB7A
ENSG00000075975.17	MKRN2
ENSG00000076003.5	MCM6
ENSG00000076043.11	REXO2
ENSG00000076053.12	RBM7
ENSG00000076108.12	BAZ2A
ENSG00000076248.11	UNG
ENSG00000076321.11	KLHL20
ENSG00000076554.15	TPD52
ENSG00000076604.15	TRAF4
ENSG00000076685.19	NT5C2
ENSG00000077147.16	TM9SF3
ENSG00000077549.19	CAPZB
ENSG00000077721.16	UBE2A
ENSG00000078043.16	PIAS2
ENSG00000078124.12	ACER3
ENSG00000078140.14	UBE2K
ENSG00000078237.7	TIGAR
ENSG00000078246.17	TULP3
ENSG00000078304.19	PPP2R5C
ENSG00000078369.18	GNB1
ENSG00000078668.14	VDAC3
ENSG00000078747.16	ITCH
ENSG00000078795.17	PKD2L2
ENSG00000079246.16	XRCC5
ENSG00000079332.15	SAR1A
ENSG00000079387.14	SENP1
ENSG00000080345.18	RIF1
ENSG00000080371.6	RAB21
ENSG00000080546.13	SESN1
ENSG00000080603.17	SRCAP
ENSG00000080815.19	PSEN1
ENSG00000080819.9	CPOX
ENSG00000080822.17	CLDND1
ENSG00000080824.19	HSP90AA1
ENSG00000081026.19	MAGI3
ENSG00000081154.12	PCNP
ENSG00000081181.8	ARG2
ENSG00000082153.18	BZW1
ENSG00000082213.18	C5orf22
ENSG00000082258.13	CCNT2
ENSG00000082641.16	NFE2L1
ENSG00000082701.17	GSK3B
ENSG00000082805.20	ERC1
ENSG00000082898.18	XPO1
ENSG00000082996.20	RNF13
ENSG00000083168.11	KAT6A
ENSG00000083312.17	TNPO1
ENSG00000083520.15	DIS3
ENSG00000083844.10	ZNF264
ENSG00000083845.9	RPS5
ENSG00000083857.14	FAT1
ENSG00000083937.10	CHMP2B
ENSG00000084073.10	ZMPSTE24
ENSG00000084090.13	STARD7
ENSG00000084092.7	NOA1
ENSG00000084093.19	REST
ENSG00000084112.15	SSH1
ENSG00000084234.18	APLP2
ENSG00000084463.8	WBP11
ENSG00000084652.16	TXLNA
ENSG00000084693.16	AGBL5
ENSG00000084733.11	RAB10
ENSG00000084774.14	CAD
ENSG00000085063.17	CD59
ENSG00000085231.14	AK6
ENSG00000085276.19	MECOM
ENSG00000085365.18	SCAMP1
ENSG00000085415.16	SEH1L
ENSG00000085433.16	WDR47
ENSG00000085719.13	CPNE3
ENSG00000085721.13	RRN3
ENSG00000085733.16	CTTN
ENSG00000085872.15	CHERP
ENSG00000086062.13	B4GALT1
ENSG00000086065.14	CHMP5
ENSG00000086189.10	DIMT1
ENSG00000086232.13	EIF2AK1
ENSG00000086475.15	SEPHS1
ENSG00000086589.12	RBM22
ENSG00000086598.11	TMED2
ENSG00000086666.19	ZFAND6
ENSG00000086712.13	TXLNG
ENSG00000086758.16	HUWE1
ENSG00000087053.20	MTMR2
ENSG00000087077.14	TRIP6
ENSG00000087086.15	FTL
ENSG00000087088.20	BAX
ENSG00000087111.21	PIGS
ENSG00000087274.17	ADD1
ENSG00000087302.9	RTRAF
ENSG00000087365.16	SF3B2
ENSG00000087995.16	METTL2A
ENSG00000088247.17	KHSRP
ENSG00000088256.9	GNA11
ENSG00000088325.16	TPX2
ENSG00000088448.14	ANKRD10
ENSG00000088682.14	COQ9
ENSG00000088808.18	PPP1R13B
ENSG00000088832.18	FKBP1A
ENSG00000088888.18	MAVS
ENSG00000088930.8	XRN2
ENSG00000088970.16	KIZ
ENSG00000088986.11	DYNLL1
ENSG00000089006.17	SNX5
ENSG00000089009.15	RPL6
ENSG00000089057.15	SLC23A2
ENSG00000089063.15	TMEM230
ENSG00000089094.19	KDM2B
ENSG00000089157.16	RPLP0
ENSG00000089159.16	PXN
ENSG00000089234.16	BRAP
ENSG00000089597.18	GANAB
ENSG00000089685.15	BIRC5
ENSG00000089693.11	MLF2
ENSG00000089737.17	DDX24
ENSG00000089818.18	NECAP1
ENSG00000089876.12	DHX32
ENSG00000089902.10	RCOR1
ENSG00000090054.15	SPTLC1
ENSG00000090060.18	PAPOLA
ENSG00000090061.17	CCNK
ENSG00000090097.22	PCBP4
ENSG00000090266.13	NDUFB2
ENSG00000090316.16	MAEA
ENSG00000090372.15	STRN4
ENSG00000090487.11	SPG21
ENSG00000090612.22	ZNF268
ENSG00000090615.15	GOLGA3
ENSG00000090621.15	PABPC4
ENSG00000090863.12	GLG1
ENSG00000090905.19	TNRC6A
ENSG00000091039.17	OSBPL8
ENSG00000091140.14	DLD
ENSG00000091164.13	TXNL1
ENSG00000091317.8	CMTM6
ENSG00000091409.15	ITGA6
ENSG00000091527.16	CDV3
ENSG00000091542.9	ALKBH5
ENSG00000092140.16	G2E3
ENSG00000092148.13	HECTD1
ENSG00000092199.18	HNRNPC
ENSG00000092201.10	SUPT16H
ENSG00000092203.15	TOX4
ENSG00000092531.10	SNAP23
ENSG00000092820.18	EZR
ENSG00000092841.19	MYL6
ENSG00000092847.13	AGO1
ENSG00000093000.19	NUP50
ENSG00000093010.15	COMT
ENSG00000093144.19	ECHDC1
ENSG00000093167.18	LRRFIP2
ENSG00000093183.14	SEC22C
ENSG00000094880.11	CDC23
ENSG00000094916.16	CBX5
ENSG00000095139.14	ARCN1
ENSG00000095261.14	PSMD5
ENSG00000095574.12	IKZF5
ENSG00000095787.23	WAC
ENSG00000096060.15	FKBP5
ENSG00000096093.16	EFHC1
ENSG00000096384.20	HSP90AB1
ENSG00000096696.14	DSP
ENSG00000097007.19	ABL1
ENSG00000097021.20	ACOT7
ENSG00000097033.14	SH3GLB1
ENSG00000099194.6	SCD
ENSG00000099204.20	ABLIM1
ENSG00000099219.14	ERMP1
ENSG00000099246.17	RAB18
ENSG00000099381.18	SETD1A
ENSG00000099399.6	MAGEB2
ENSG00000099622.14	CIRBP
ENSG00000099810.21	MTAP
ENSG00000099817.12	POLR2E
ENSG00000099940.12	SNAP29
ENSG00000099942.13	CRKL
ENSG00000099968.18	BCL2L13
ENSG00000099995.19	SF3A1
ENSG00000100028.12	SNRPD3
ENSG00000100030.15	MAPK1
ENSG00000100075.10	SLC25A1
ENSG00000100129.18	EIF3L
ENSG00000100138.15	SNU13
ENSG00000100147.14	CCDC134
ENSG00000100201.23	DDX17
ENSG00000100216.6	TOMM22
ENSG00000100219.16	XBP1
ENSG00000100221.10	JOSD1
ENSG00000100225.18	FBXO7
ENSG00000100227.18	POLDIP3
ENSG00000100243.21	CYB5R3
ENSG00000100281.14	HMGXB4
ENSG00000100304.13	TTLL12
ENSG00000100320.23	RBFOX2
ENSG00000100335.15	MIEF1
ENSG00000100345.22	MYH9
ENSG00000100354.21	TNRC6B
ENSG00000100380.14	ST13
ENSG00000100393.14	EP300
ENSG00000100410.8	PHF5A
ENSG00000100412.17	ACO2
ENSG00000100413.17	POLR3H
ENSG00000100441.10	KHNYN
ENSG00000100445.17	SDR39U1
ENSG00000100461.18	RBM23
ENSG00000100462.16	PRMT5
ENSG00000100473.18	COCH
ENSG00000100478.15	AP4S1
ENSG00000100522.10	GNPNAT1
ENSG00000100528.12	CNIH1
ENSG00000100554.12	ATP6V1D
ENSG00000100564.9	PIGH
ENSG00000100567.13	PSMA3
ENSG00000100568.11	VTI1B
ENSG00000100580.8	TMED8
ENSG00000100591.8	AHSA1
ENSG00000100596.7	SPTLC2
ENSG00000100614.18	PPM1A
ENSG00000100625.9	SIX4
ENSG00000100632.11	ERH
ENSG00000100644.17	HIF1A
ENSG00000100647.8	SUSD6
ENSG00000100664.11	EIF5
ENSG00000100711.14	ZFYVE21
ENSG00000100731.16	PCNX1
ENSG00000100744.15	GSKIP
ENSG00000100796.17	PPP4R3A
ENSG00000100804.19	PSMB5
ENSG00000100811.14	YY1
ENSG00000100814.18	CCNB1IP1
ENSG00000100815.12	TRIP11
ENSG00000100823.12	APEX1
ENSG00000100852.13	ARHGAP5
ENSG00000100902.11	PSMA6
ENSG00000100926.15	TM9SF1
ENSG00000100934.15	SEC23A
ENSG00000100941.9	PNN
ENSG00000101003.10	GINS1
ENSG00000101057.16	MYBL2
ENSG00000101082.14	SLA2
ENSG00000101084.18	RAB5IF
ENSG00000101109.12	STK4
ENSG00000101126.18	ADNP
ENSG00000101138.12	CSTF1
ENSG00000101150.18	TPD52L2
ENSG00000101152.11	DNAJC5
ENSG00000101158.15	NELFCD
ENSG00000101166.16	PRELID3B
ENSG00000101182.15	PSMA7
ENSG00000101187.16	SLCO4A1
ENSG00000101188.5	NTSR1
ENSG00000101191.17	DIDO1
ENSG00000101193.8	GID8
ENSG00000101224.17	CDC25B
ENSG00000101255.11	TRIB3
ENSG00000101266.19	CSNK2A1
ENSG00000101290.14	CDS2
ENSG00000101311.16	FERMT1
ENSG00000101337.16	TM9SF4
ENSG00000101346.14	POFUT1
ENSG00000101350.8	KIF3B
ENSG00000101361.17	NOP56
ENSG00000101363.12	MANBAL
ENSG00000101367.9	MAPRE1
ENSG00000101413.12	RPRD1B
ENSG00000101421.4	CHMP4B
ENSG00000101444.13	AHCY
ENSG00000101447.15	FAM83D
ENSG00000101474.12	APMAP
ENSG00000101544.9	ADNP2
ENSG00000101557.15	USP14
ENSG00000101558.14	VAPA
ENSG00000101608.13	MYL12A
ENSG00000101654.18	RNMT
ENSG00000101773.19	RBBP8
ENSG00000101843.19	PSMD10
ENSG00000101856.10	PGRMC1
ENSG00000101871.16	MID1
ENSG00000101888.12	NXT2
ENSG00000101928.13	MOSPD1
ENSG00000101935.10	AMMECR1
ENSG00000101972.19	STAG2
ENSG00000102007.11	PLP2
ENSG00000102054.18	RBBP7
ENSG00000102100.16	SLC35A2
ENSG00000102144.15	PGK1
ENSG00000102158.20	MAGT1
ENSG00000102225.16	CDK16
ENSG00000102290.22	PCDH11X
ENSG00000102309.15	PIN4
ENSG00000102317.18	RBM3
ENSG00000102393.14	GLA
ENSG00000102471.14	NDFIP2
ENSG00000102531.16	FNDC3A
ENSG00000102554.14	KLF5
ENSG00000102572.15	STK24
ENSG00000102580.15	DNAJC3
ENSG00000102606.18	ARHGEF7
ENSG00000102699.6	PARP4
ENSG00000102753.10	KPNA3
ENSG00000102804.15	TSC22D1
ENSG00000102858.13	MGRN1
ENSG00000102870.6	ZNF629
ENSG00000102898.12	NUTF2
ENSG00000102908.22	NFAT5
ENSG00000102910.14	LONP2
ENSG00000102931.8	ARL2BP
ENSG00000102934.10	PLLP
ENSG00000102974.16	CTCF
ENSG00000102978.13	POLR2C
ENSG00000103005.12	USB1
ENSG00000103018.17	CYB5B
ENSG00000103035.11	PSMD7
ENSG00000103037.12	SETD6
ENSG00000103044.11	HAS3
ENSG00000103061.13	SLC7A6OS
ENSG00000103064.15	SLC7A6
ENSG00000103160.12	HSDL1
ENSG00000103187.8	COTL1
ENSG00000103194.16	USP10
ENSG00000103202.13	NME4
ENSG00000103257.9	SLC7A5
ENSG00000103266.11	STUB1
ENSG00000103275.21	UBE2I
ENSG00000103342.13	GSPT1
ENSG00000103353.16	UBFD1
ENSG00000103356.18	EARS2
ENSG00000103365.15	GGA2
ENSG00000103423.14	DNAJA3
ENSG00000103502.14	CDIPT
ENSG00000103740.10	ACSBG1
ENSG00000103769.10	RAB11A
ENSG00000103855.18	CD276
ENSG00000103966.11	EHD4
ENSG00000104067.17	TJP1
ENSG00000104131.13	EIF3J
ENSG00000104133.15	SPG11
ENSG00000104164.12	BLOC1S6
ENSG00000104219.13	ZDHHC2
ENSG00000104231.11	ZFAND1
ENSG00000104320.14	NBN
ENSG00000104331.9	BPNT2
ENSG00000104341.17	LAPTM4B
ENSG00000104343.21	UBE2W
ENSG00000104388.15	RAB2A
ENSG00000104408.11	EIF3E
ENSG00000104419.17	NDRG1
ENSG00000104442.10	ARMC1
ENSG00000104472.10	CHRAC1
ENSG00000104626.15	ERI1
ENSG00000104635.15	SLC39A14
ENSG00000104660.19	LEPROTL1
ENSG00000104687.14	GSR
ENSG00000104689.10	TNFRSF10A
ENSG00000104695.13	PPP2CB
ENSG00000104738.18	MCM4
ENSG00000104756.16	KCTD9
ENSG00000104763.20	ASAH1
ENSG00000104765.16	BNIP3L
ENSG00000104812.15	GYS1
ENSG00000104824.17	HNRNPL
ENSG00000104853.16	CLPTM1
ENSG00000104904.12	OAZ1
ENSG00000104969.11	SGTA
ENSG00000104979.9	C19orf53
ENSG00000105011.9	ASF1B
ENSG00000105058.12	FAM32A
ENSG00000105072.9	C19orf44
ENSG00000105176.18	URI1
ENSG00000105193.9	RPS16
ENSG00000105220.17	GPI
ENSG00000105229.7	PIAS4
ENSG00000105245.9	NUMBL
ENSG00000105281.12	SLC1A5
ENSG00000105323.17	HNRNPUL1
ENSG00000105329.11	TGFB1
ENSG00000105341.19	DMAC2
ENSG00000105355.9	PLIN3
ENSG00000105372.8	RPS19
ENSG00000105401.9	CDC37
ENSG00000105438.9	KDELR1
ENSG00000105552.15	BCAT2
ENSG00000105583.11	WDR83OS
ENSG00000105640.13	RPL18A
ENSG00000105647.19	PIK3R2
ENSG00000105700.11	KXD1
ENSG00000105723.13	GSK3A
ENSG00000105778.19	AVL9
ENSG00000105810.10	CDK6
ENSG00000105835.12	NAMPT
ENSG00000105849.6	POLR1F
ENSG00000105856.14	HBP1
ENSG00000105877.18	DNAH11
ENSG00000105879.12	CBLL1
ENSG00000105887.11	MTPN
ENSG00000105889.16	STEAP1B
ENSG00000105939.13	ZC3HAV1
ENSG00000105968.19	H2AZ2
ENSG00000105971.15	CAV2
ENSG00000105974.13	CAV1
ENSG00000105976.16	MET
ENSG00000105983.22	LMBR1
ENSG00000105993.15	DNAJB6
ENSG00000106080.11	FKBP14
ENSG00000106144.20	CASP2
ENSG00000106211.10	HSPB1
ENSG00000106244.13	PDAP1
ENSG00000106246.18	PTCD1
ENSG00000106261.17	ZKSCAN1
ENSG00000106290.15	TAF6
ENSG00000106344.8	RBM28
ENSG00000106348.18	IMPDH1
ENSG00000106484.16	MEST
ENSG00000106546.14	AHR
ENSG00000106554.13	CHCHD3
ENSG00000106588.12	PSMA2
ENSG00000106609.16	TMEM248
ENSG00000106615.10	RHEB
ENSG00000106628.11	POLD2
ENSG00000106635.8	BCL7B
ENSG00000106636.9	YKT6
ENSG00000106682.15	EIF4H
ENSG00000106683.15	LIMK1
ENSG00000106723.17	SPIN1
ENSG00000106771.13	TMEM245
ENSG00000106785.15	TRIM14
ENSG00000106799.13	TGFBR1
ENSG00000107036.12	RIC1
ENSG00000107164.16	FUBP3
ENSG00000107185.10	RGP1
ENSG00000107262.26	BAG1
ENSG00000107290.14	SETX
ENSG00000107341.5	UBE2R2
ENSG00000107372.13	ZFAND5
ENSG00000107554.17	DNMBP
ENSG00000107566.14	ERLIN1
ENSG00000107581.13	EIF3A
ENSG00000107651.13	SEC23IP
ENSG00000107669.18	ATE1
ENSG00000107679.14	PLEKHA1
ENSG00000107789.16	MINPP1
ENSG00000107816.17	LZTS2
ENSG00000107854.6	TNKS2
ENSG00000107863.18	ARHGAP21
ENSG00000107929.15	LARP4B
ENSG00000107937.19	GTPBP4
ENSG00000107949.17	BCCIP
ENSG00000107951.15	MTPAP
ENSG00000107984.10	DKK1
ENSG00000108021.20	TASOR2
ENSG00000108061.12	SHOC2
ENSG00000108064.11	TFAM
ENSG00000108091.11	CCDC6
ENSG00000108100.18	CCNY
ENSG00000108107.15	RPL28
ENSG00000108175.17	ZMIZ1
ENSG00000108179.14	PPIF
ENSG00000108219.15	TSPAN14
ENSG00000108256.9	NUFIP2
ENSG00000108298.12	RPL19
ENSG00000108375.13	RNF43
ENSG00000108389.9	MTMR4
ENSG00000108395.14	TRIM37
ENSG00000108406.10	DHX40
ENSG00000108424.11	KPNB1
ENSG00000108439.11	PNPO
ENSG00000108443.14	RPS6KB1
ENSG00000108468.15	CBX1
ENSG00000108474.17	PIGL
ENSG00000108510.10	MED13
ENSG00000108518.8	PFN1
ENSG00000108523.16	RNF167
ENSG00000108559.12	NUP88
ENSG00000108561.8	C1QBP
ENSG00000108582.12	CPD
ENSG00000108587.16	GOSR1
ENSG00000108588.14	CCDC47
ENSG00000108639.8	SYNGR2
ENSG00000108654.16	DDX5
ENSG00000108671.11	PSMD11
ENSG00000108679.13	LGALS3BP
ENSG00000108684.15	ASIC2
ENSG00000108774.15	RAB5C
ENSG00000108788.12	MLX
ENSG00000108819.11	PPP1R9B
ENSG00000108829.10	LRRC59
ENSG00000108854.16	SMURF2
ENSG00000108946.15	PRKAR1A
ENSG00000108953.17	YWHAE
ENSG00000109084.14	TMEM97
ENSG00000109099.16	PMP22
ENSG00000109118.14	PHF12
ENSG00000109133.13	TMEM33
ENSG00000109171.15	SLAIN2
ENSG00000109180.15	OCIAD1
ENSG00000109189.13	USP46
ENSG00000109320.13	NFKB1
ENSG00000109321.11	AREG
ENSG00000109332.20	UBE2D3
ENSG00000109390.13	NDUFC1
ENSG00000109519.13	GRPEL1
ENSG00000109572.14	CLCN3
ENSG00000109586.12	GALNT7
ENSG00000109606.13	DHX15
ENSG00000109654.16	TRIM2
ENSG00000109670.16	FBXW7
ENSG00000109685.19	NSD2
ENSG00000109689.18	STIM2
ENSG00000109736.15	MFSD10
ENSG00000109787.13	KLF3
ENSG00000109854.14	HTATIP2
ENSG00000109929.10	SC5D
ENSG00000109971.14	HSPA8
ENSG00000110013.13	SIAE
ENSG00000110048.12	OSBP
ENSG00000110075.15	PPP6R3
ENSG00000110092.4	CCND1
ENSG00000110104.13	CCDC86
ENSG00000110107.9	PRPF19
ENSG00000110108.10	TMEM109
ENSG00000110172.12	CHORDC1
ENSG00000110218.9	PANX1
ENSG00000110315.7	RNF141
ENSG00000110321.19	EIF4G2
ENSG00000110344.10	UBE4A
ENSG00000110367.13	DDX6
ENSG00000110395.7	CBL
ENSG00000110400.11	NECTIN1
ENSG00000110422.12	HIPK3
ENSG00000110651.12	CD81
ENSG00000110660.15	SLC35F2
ENSG00000110696.10	C11orf58
ENSG00000110700.7	RPS13
ENSG00000110851.12	PRDM4
ENSG00000110880.11	CORO1C
ENSG00000110906.13	KCTD10
ENSG00000110917.8	MLEC
ENSG00000110955.9	ATP5F1B
ENSG00000110958.16	PTGES3
ENSG00000111011.18	RSRC2
ENSG00000111142.14	METAP2
ENSG00000111145.8	ELK3
ENSG00000111186.13	WNT5B
ENSG00000111203.13	ITFG2
ENSG00000111206.13	FOXM1
ENSG00000111247.15	RAD51AP1
ENSG00000111252.11	SH2B3
ENSG00000111319.13	SCNN1A
ENSG00000111328.7	CDK2AP1
ENSG00000111371.16	SLC38A1
ENSG00000111412.6	SPRING1
ENSG00000111481.10	COPZ1
ENSG00000111530.13	CAND1
ENSG00000111540.16	RAB5B
ENSG00000111605.18	CPSF6
ENSG00000111640.15	GAPDH
ENSG00000111652.10	COPS7A
ENSG00000111669.15	TPI1
ENSG00000111670.16	GNPTAB
ENSG00000111676.15	ATN1
ENSG00000111684.11	LPCAT3
ENSG00000111707.12	SUDS3
ENSG00000111711.10	GOLT1B
ENSG00000111716.14	LDHB
ENSG00000111725.11	PRKAB1
ENSG00000111737.12	RAB35
ENSG00000111752.11	PHC1
ENSG00000111775.3	COX6A1
ENSG00000111780.8	AL021546.1
ENSG00000111786.9	SRSF9
ENSG00000111817.19	DSE
ENSG00000111843.14	TMEM14C
ENSG00000111885.7	MAN1A1
ENSG00000111897.7	SERINC1
ENSG00000111906.18	HDDC2
ENSG00000111907.21	TPD52L1
ENSG00000111913.20	RIPOR2
ENSG00000111981.5	ULBP1
ENSG00000112031.16	MTRF1L
ENSG00000112062.11	MAPK14
ENSG00000112078.14	KCTD20
ENSG00000112081.17	SRSF3
ENSG00000112096.19	SOD2
ENSG00000112110.10	MRPL18
ENSG00000112118.20	MCM3
ENSG00000112159.12	MDN1
ENSG00000112200.17	ZNF451
ENSG00000112208.11	BAG2
ENSG00000112242.15	E2F3
ENSG00000112245.12	PTP4A1
ENSG00000112249.14	ASCC3
ENSG00000112290.13	WASF1
ENSG00000112306.8	RPS12
ENSG00000112308.13	C6orf62
ENSG00000112312.10	GMNN
ENSG00000112335.15	SNX3
ENSG00000112378.12	PERP
ENSG00000112531.17	QKI
ENSG00000112624.12	BICRAL
ENSG00000112640.16	PPP2R5D
ENSG00000112695.11	COX7A2
ENSG00000112697.17	TMEM30A
ENSG00000112715.25	VEGFA
ENSG00000112787.13	FBRSL1
ENSG00000112996.11	MRPS30
ENSG00000113013.16	HSPA9
ENSG00000113048.17	MRPS27
ENSG00000113068.10	PFDN1
ENSG00000113163.18	CERT1
ENSG00000113194.13	FAF2
ENSG00000113269.14	RNF130
ENSG00000113300.13	CNOT6
ENSG00000113328.19	CCNG1
ENSG00000113356.13	POLR3G
ENSG00000113369.9	ARRDC3
ENSG00000113384.14	GOLPH3
ENSG00000113387.12	SUB1
ENSG00000113441.16	LNPEP
ENSG00000113552.16	GNPDA1
ENSG00000113558.19	SKP1
ENSG00000113569.16	NUP155
ENSG00000113575.10	PPP2CA
ENSG00000113583.8	C5orf15
ENSG00000113648.16	MACROH2A1
ENSG00000113649.11	TCERG1
ENSG00000113658.18	SMAD5
ENSG00000113712.19	CSNK1A1
ENSG00000113719.16	ERGIC1
ENSG00000113732.9	ATP6V0E1
ENSG00000113739.10	STC2
ENSG00000114030.13	KPNA1
ENSG00000114120.14	SLC25A36
ENSG00000114125.14	RNF7
ENSG00000114126.18	TFDP2
ENSG00000114209.15	PDCD10
ENSG00000114302.16	PRKAR2A
ENSG00000114353.17	GNAI2
ENSG00000114354.15	TFG
ENSG00000114439.19	BBX
ENSG00000114473.14	IQCG
ENSG00000114503.11	NCBP2
ENSG00000114573.10	ATP6V1A
ENSG00000114686.9	MRPL3
ENSG00000114779.19	ABHD14B
ENSG00000114784.4	EIF1B
ENSG00000114850.7	SSR3
ENSG00000114867.22	EIF4G1
ENSG00000114902.14	SPCS1
ENSG00000114933.16	INO80D
ENSG00000114978.18	MOB1A
ENSG00000114999.8	TTL
ENSG00000115053.17	NCL
ENSG00000115091.12	ACTR3
ENSG00000115128.7	SF3B6
ENSG00000115159.16	GPD2
ENSG00000115163.15	CENPA
ENSG00000115183.15	TANC1
ENSG00000115207.13	GTF3C2
ENSG00000115233.12	PSMD14
ENSG00000115239.24	ASB3
ENSG00000115290.10	GRB14
ENSG00000115310.18	RTN4
ENSG00000115364.14	MRPL19
ENSG00000115365.12	LANCL1
ENSG00000115415.20	STAT1
ENSG00000115464.15	USP34
ENSG00000115484.15	CCT4
ENSG00000115520.8	COQ10B
ENSG00000115540.15	MOB4
ENSG00000115541.11	HSPE1
ENSG00000115561.16	CHMP3
ENSG00000115641.19	FHL2
ENSG00000115677.17	HDLBP
ENSG00000115738.10	ID2
ENSG00000115758.13	ODC1
ENSG00000115760.14	BIRC6
ENSG00000115762.16	PLEKHB2
ENSG00000115806.13	GORASP2
ENSG00000115816.15	CEBPZ
ENSG00000115884.11	SDC1
ENSG00000115946.8	PNO1
ENSG00000115947.14	ORC4
ENSG00000115966.17	ATF2
ENSG00000116005.12	PCYOX1
ENSG00000116030.17	SUMO1
ENSG00000116044.16	NFE2L2
ENSG00000116120.11	FARSB
ENSG00000116127.19	ALMS1
ENSG00000116133.13	DHCR24
ENSG00000116138.13	DNAJC16
ENSG00000116161.18	CACYBP
ENSG00000116171.19	SCP2
ENSG00000116199.12	FAM20B
ENSG00000116209.12	TMEM59
ENSG00000116237.16	ICMT
ENSG00000116251.11	RPL22
ENSG00000116285.13	ERRFI1
ENSG00000116288.13	PARK7
ENSG00000116459.11	ATP5PB
ENSG00000116473.14	RAP1A
ENSG00000116489.13	CAPZA1
ENSG00000116521.11	SCAMP3
ENSG00000116580.18	GON4L
ENSG00000116604.18	MEF2D
ENSG00000116649.10	SRM
ENSG00000116698.21	SMG7
ENSG00000116745.7	RPE65
ENSG00000116747.13	RO60
ENSG00000116752.6	BCAS2
ENSG00000116754.13	SRSF11
ENSG00000116922.14	C1orf109
ENSG00000116954.8	RRAGC
ENSG00000116977.19	LGALS8
ENSG00000117000.9	RLF
ENSG00000117054.14	ACADM
ENSG00000117133.11	RPF1
ENSG00000117139.18	KDM5B
ENSG00000117153.16	KLHL12
ENSG00000117155.17	SSX2IP
ENSG00000117174.11	ZNHIT6
ENSG00000117222.14	RBBP5
ENSG00000117335.20	CD46
ENSG00000117362.13	APH1A
ENSG00000117394.24	SLC2A1
ENSG00000117481.10	NSUN4
ENSG00000117500.13	TMED5
ENSG00000117505.13	DR1
ENSG00000117519.16	CNN3
ENSG00000117523.16	PRRC2C
ENSG00000117592.9	PRDX6
ENSG00000117597.18	UTP25
ENSG00000117614.10	SYF2
ENSG00000117632.23	STMN1
ENSG00000117713.20	ARID1A
ENSG00000117751.18	PPP1R8
ENSG00000117862.13	TXNDC12
ENSG00000117868.17	ESYT2
ENSG00000117899.11	MESD
ENSG00000118007.13	STAG1
ENSG00000118058.23	KMT2A
ENSG00000118181.11	RPS25
ENSG00000118200.14	CAMSAP2
ENSG00000118412.13	CASP8AP2
ENSG00000118496.5	FBXO30
ENSG00000118564.15	FBXL5
ENSG00000118579.13	MED28
ENSG00000118689.15	FOXO3
ENSG00000118705.17	RPN2
ENSG00000118816.11	CCNI
ENSG00000118873.16	RAB3GAP2
ENSG00000118900.15	UBN1
ENSG00000118961.15	LDAH
ENSG00000119048.8	UBE2B
ENSG00000119231.11	SENP5
ENSG00000119280.17	C1orf198
ENSG00000119285.11	HEATR1
ENSG00000119314.16	PTBP3
ENSG00000119318.13	RAD23B
ENSG00000119335.17	SET
ENSG00000119396.11	RAB14
ENSG00000119401.11	TRIM32
ENSG00000119402.17	FBXW2
ENSG00000119414.12	PPP6C
ENSG00000119421.7	NDUFA8
ENSG00000119446.14	RBM18
ENSG00000119487.17	MAPKAP1
ENSG00000119523.10	ALG2
ENSG00000119537.18	KDSR
ENSG00000119541.10	VPS4B
ENSG00000119616.11	FCF1
ENSG00000119655.11	NPC2
ENSG00000119682.17	AREL1
ENSG00000119689.15	DLST
ENSG00000119729.12	RHOQ
ENSG00000119777.20	TMEM214
ENSG00000119787.14	ATL2
ENSG00000119888.11	EPCAM
ENSG00000119899.13	SLC17A5
ENSG00000119929.13	CUTC
ENSG00000119950.21	MXI1
ENSG00000119953.14	SMNDC1
ENSG00000119969.15	HELLS
ENSG00000119977.21	TCTN3
ENSG00000119979.18	DENND10
ENSG00000120063.10	GNA13
ENSG00000120071.15	KANSL1
ENSG00000120137.7	PANK3
ENSG00000120253.14	NUP43
ENSG00000120265.18	PCMT1
ENSG00000120306.11	CYSTM1
ENSG00000120437.9	ACAT2
ENSG00000120438.12	TCP1
ENSG00000120685.20	PROSER1
ENSG00000120694.20	HSPH1
ENSG00000120705.13	ETF1
ENSG00000120709.11	FAM53C
ENSG00000120725.13	SIL1
ENSG00000120727.13	PAIP2
ENSG00000120733.14	KDM3B
ENSG00000120738.8	EGR1
ENSG00000120742.11	SERP1
ENSG00000120802.14	TMPO
ENSG00000120805.14	ARL1
ENSG00000120820.12	GLT8D2
ENSG00000120875.9	DUSP4
ENSG00000120889.13	TNFRSF10B
ENSG00000120948.18	TARDBP
ENSG00000120963.12	ZNF706
ENSG00000120992.18	LYPLA1
ENSG00000121039.10	RDH10
ENSG00000121057.13	AKAP1
ENSG00000121060.18	TRIM25
ENSG00000121073.15	SLC35B1
ENSG00000121579.13	NAA50
ENSG00000121644.19	DESI2
ENSG00000121743.4	GJA3
ENSG00000121766.16	ZCCHC17
ENSG00000121774.18	KHDRBS1
ENSG00000121775.18	TMEM39B
ENSG00000121864.10	ZNF639
ENSG00000121892.15	PDS5A
ENSG00000121988.18	ZRANB3
ENSG00000122012.14	SV2C
ENSG00000122068.13	FYTTD1
ENSG00000122203.15	KIAA1191
ENSG00000122218.16	COPA
ENSG00000122406.14	RPL5
ENSG00000122482.21	ZNF644
ENSG00000122515.15	ZMIZ2
ENSG00000122545.20	SEPTIN7
ENSG00000122565.19	CBX3
ENSG00000122566.22	HNRNPA2B1
ENSG00000122692.9	SMU1
ENSG00000122705.17	CLTA
ENSG00000122783.17	CYREN
ENSG00000122786.20	CALD1
ENSG00000122863.6	CHST3
ENSG00000122958.15	VPS26A
ENSG00000123066.9	MED13L
ENSG00000123091.5	RNF11
ENSG00000123144.11	TRIR
ENSG00000123154.12	WDR83
ENSG00000123179.14	EBPL
ENSG00000123268.9	ATF1
ENSG00000123416.15	TUBA1B
ENSG00000123472.12	ATPAF1
ENSG00000123473.16	STIL
ENSG00000123505.19	AMD1
ENSG00000123600.20	METTL8
ENSG00000123636.18	BAZ2B
ENSG00000123728.10	RAP2C
ENSG00000123908.12	AGO2
ENSG00000123975.5	CKS2
ENSG00000123983.14	ACSL3
ENSG00000123989.14	CHPF
ENSG00000124145.6	SDC4
ENSG00000124160.12	NCOA5
ENSG00000124164.16	VAPB
ENSG00000124171.9	PARD6B
ENSG00000124172.10	ATP5F1E
ENSG00000124193.16	SRSF6
ENSG00000124198.9	ARFGEF2
ENSG00000124207.17	CSE1L
ENSG00000124208.16	PEDS1-UBE2V1
ENSG00000124209.4	RAB22A
ENSG00000124214.20	STAU1
ENSG00000124226.11	RNF114
ENSG00000124333.16	VAMP7
ENSG00000124333.16_PAR_Y	VAMP7
ENSG00000124422.12	USP22
ENSG00000124541.7	RRP36
ENSG00000124593.16	AL365205.1
ENSG00000124596.17	OARD1
ENSG00000124641.16	MED20
ENSG00000124733.5	MEA1
ENSG00000124749.17	COL21A1
ENSG00000124762.14	CDKN1A
ENSG00000124766.7	SOX4
ENSG00000124767.7	GLO1
ENSG00000124783.14	SSR1
ENSG00000124789.12	NUP153
ENSG00000124795.17	DEK
ENSG00000124802.12	EEF1E1
ENSG00000124831.19	LRRFIP1
ENSG00000124882.4	EREG
ENSG00000125107.18	CNOT1
ENSG00000125148.7	MT2A
ENSG00000125166.13	GOT2
ENSG00000125249.7	RAP2A
ENSG00000125484.12	GTF3C4
ENSG00000125534.10	PPDPF
ENSG00000125630.16	POLR1B
ENSG00000125648.15	SLC25A23
ENSG00000125651.14	GTF2F1
ENSG00000125686.12	MED1
ENSG00000125691.14	RPL23
ENSG00000125695.12	AC046185.1
ENSG00000125733.18	TRIP10
ENSG00000125741.5	OPA3
ENSG00000125753.14	VASP
ENSG00000125818.18	PSMF1
ENSG00000125834.13	STK35
ENSG00000125835.19	SNRPB
ENSG00000125863.20	MKKS
ENSG00000125868.16	DSTN
ENSG00000125875.14	TBC1D20
ENSG00000125944.21	HNRNPR
ENSG00000125952.20	MAX
ENSG00000125954.12	CHURC1-FNTB
ENSG00000125968.9	ID1
ENSG00000125970.12	RALY
ENSG00000125971.17	DYNLRB1
ENSG00000125977.7	EIF2S2
ENSG00000126003.7	PLAGL2
ENSG00000126067.12	PSMB2
ENSG00000126106.14	TMEM53
ENSG00000126247.11	CAPNS1
ENSG00000126457.22	PRMT1
ENSG00000126524.10	SBDS
ENSG00000126581.13	BECN1
ENSG00000126698.11	DNAJC8
ENSG00000126746.17	ZNF384
ENSG00000126749.16	EMG1
ENSG00000126767.18	ELK1
ENSG00000126773.13	PCNX4
ENSG00000126777.18	KTN1
ENSG00000126858.18	RHOT1
ENSG00000126878.13	AIF1L
ENSG00000126945.9	HNRNPH2
ENSG00000127022.15	CANX
ENSG00000127184.13	COX7C
ENSG00000127314.18	RAP1B
ENSG00000127418.15	FGFRL1
ENSG00000127483.19	HP1BP3
ENSG00000127526.15	SLC35E1
ENSG00000127527.14	EPS15L1
ENSG00000127530.4	OR7C1
ENSG00000127540.12	UQCR11
ENSG00000127804.13	METTL16
ENSG00000127838.14	PNKD
ENSG00000127870.17	RNF6
ENSG00000127947.16	PTPN12
ENSG00000127955.17	GNAI1
ENSG00000128050.9	PAICS
ENSG00000128059.8	PPAT
ENSG00000128245.15	YWHAH
ENSG00000128272.15	ATF4
ENSG00000128283.7	CDC42EP1
ENSG00000128463.13	EMC4
ENSG00000128567.17	PODXL
ENSG00000128585.18	MKLN1
ENSG00000128595.17	CALU
ENSG00000128607.14	KLHDC10
ENSG00000128789.21	PSMG2
ENSG00000128791.12	TWSG1
ENSG00000128944.13	KNSTRN
ENSG00000128973.13	CLN6
ENSG00000128989.11	ARPP19
ENSG00000129055.13	ANAPC13
ENSG00000129084.18	PSMA1
ENSG00000129103.19	SUMF2
ENSG00000129116.19	PALLD
ENSG00000129187.14	DCTD
ENSG00000129197.14	RPAIN
ENSG00000129250.12	KIF1C
ENSG00000129255.16	MPDU1
ENSG00000129315.11	CCNT1
ENSG00000129351.17	ILF3
ENSG00000129353.15	SLC44A2
ENSG00000129422.14	MTUS1
ENSG00000129515.20	SNX6
ENSG00000129559.13	NEDD8
ENSG00000129562.11	DAD1
ENSG00000129625.13	REEP5
ENSG00000129657.16	SEC14L1
ENSG00000130066.16	SAT1
ENSG00000130119.17	GNL3L
ENSG00000130147.16	SH3BP4
ENSG00000130164.14	LDLR
ENSG00000130227.17	XPO7
ENSG00000130309.11	COLGALT1
ENSG00000130338.13	TULP4
ENSG00000130382.9	MLLT1
ENSG00000130402.13	ACTN4
ENSG00000130513.6	GDF15
ENSG00000130520.11	LSM4
ENSG00000130522.6	JUND
ENSG00000130544.12	ZNF557
ENSG00000130559.19	CAMSAP1
ENSG00000130713.16	EXOSC2
ENSG00000130717.13	UCK1
ENSG00000130723.21	PRRC2B
ENSG00000130726.12	TRIM28
ENSG00000130741.11	EIF2S3
ENSG00000130764.10	LRRC47
ENSG00000130766.5	SESN2
ENSG00000130803.15	ZNF317
ENSG00000130816.17	DNMT1
ENSG00000130821.17	SLC6A8
ENSG00000130935.10	NOL11
ENSG00000131016.17	AKAP12
ENSG00000131019.11	ULBP3
ENSG00000131023.13	LATS1
ENSG00000131043.12	AAR2
ENSG00000131051.24	RBM39
ENSG00000131100.13	ATP6V1E1
ENSG00000131115.16	ZNF227
ENSG00000131126.19	TEX101
ENSG00000131127.14	ZNF141
ENSG00000131149.19	GSE1
ENSG00000131165.16	CHMP1A
ENSG00000131171.13	SH3BGRL
ENSG00000131236.18	CAP1
ENSG00000131238.18	PPT1
ENSG00000131263.13	RLIM
ENSG00000131323.16	TRAF3
ENSG00000131355.15	ADGRE3
ENSG00000131368.8	MRPS25
ENSG00000131381.12	RBSN
ENSG00000131389.17	SLC6A6
ENSG00000131462.8	TUBG1
ENSG00000131467.11	PSME3
ENSG00000131469.15	RPL27
ENSG00000131470.15	PSMC3IP
ENSG00000131473.17	ACLY
ENSG00000131503.21	ANKHD1
ENSG00000131504.17	DIAPH1
ENSG00000131508.16	UBE2D2
ENSG00000131653.13	TRAF7
ENSG00000131759.18	RARA
ENSG00000131773.14	KHDRBS3
ENSG00000131828.14	PDHA1
ENSG00000131871.15	SELENOS
ENSG00000131873.7	CHSY1
ENSG00000132002.9	DNAJB1
ENSG00000132155.13	RAF1
ENSG00000132199.20	ENOSF1
ENSG00000132256.19	TRIM5
ENSG00000132286.12	TIMM10B
ENSG00000132305.21	IMMT
ENSG00000132313.15	MRPL35
ENSG00000132341.12	RAN
ENSG00000132356.11	PRKAA1
ENSG00000132359.15	RAP1GAP2
ENSG00000132383.12	RPA1
ENSG00000132388.12	UBE2G1
ENSG00000132405.19	TBC1D14
ENSG00000132463.14	GRSF1
ENSG00000132466.19	ANKRD17
ENSG00000132471.12	WBP2
ENSG00000132475.10	H3-3B
ENSG00000132507.18	EIF5A
ENSG00000132522.16	GPS2
ENSG00000132603.15	NIP7
ENSG00000132692.19	BCAN
ENSG00000132698.15	RAB25
ENSG00000132768.14	DPH2
ENSG00000132819.17	RBM38
ENSG00000132824.14	SERINC3
ENSG00000132846.6	ZBED3
ENSG00000132912.13	DCTN4
ENSG00000132952.12	USPL1
ENSG00000132953.16	XPO4
ENSG00000132963.8	POMP
ENSG00000132964.12	CDK8
ENSG00000133030.22	MPRIP
ENSG00000133065.11	SLC41A1
ENSG00000133112.17	TPT1
ENSG00000133119.13	RFC3
ENSG00000133193.12	FAM104A
ENSG00000133226.17	SRRM1
ENSG00000133243.10	BTBD2
ENSG00000133393.13	CEP20
ENSG00000133477.17	FAM83F
ENSG00000133606.11	MKRN1
ENSG00000133641.18	C12orf29
ENSG00000133657.16	ATP13A3
ENSG00000133703.13	KRAS
ENSG00000133731.10	IMPA1
ENSG00000133789.15	SWAP70
ENSG00000133812.16	SBF2
ENSG00000133818.14	RRAS2
ENSG00000133872.14	SARAF
ENSG00000133884.10	DPF2
ENSG00000133895.17	MEN1
ENSG00000133983.16	COX16
ENSG00000134001.15	EIF2S1
ENSG00000134046.12	MBD2
ENSG00000134049.6	IER3IP1
ENSG00000134086.8	VHL
ENSG00000134108.14	ARL8B
ENSG00000134247.10	PTGFRN
ENSG00000134248.14	LAMTOR5
ENSG00000134250.20	NOTCH2
ENSG00000134283.18	PPHLN1
ENSG00000134287.10	ARF3
ENSG00000134291.12	TMEM106C
ENSG00000134294.14	SLC38A2
ENSG00000134308.14	YWHAQ
ENSG00000134333.14	LDHA
ENSG00000134352.20	IL6ST
ENSG00000134375.11	TIMM17A
ENSG00000134419.15	RPS15A
ENSG00000134440.12	NARS1
ENSG00000134590.14	RTL8C
ENSG00000134644.16	PUM1
ENSG00000134684.11	YARS1
ENSG00000134686.18	PHC2
ENSG00000134717.18	BTF3L4
ENSG00000134744.14	TUT4
ENSG00000134758.14	RNF138
ENSG00000134779.15	TPGS2
ENSG00000134824.14	FADS2
ENSG00000134825.16	TMEM258
ENSG00000134851.13	TMEM165
ENSG00000134852.15	CLOCK
ENSG00000134882.16	UBAC2
ENSG00000134884.15	ARGLU1
ENSG00000134910.14	STT3A
ENSG00000134970.14	TMED7
ENSG00000135002.12	RFK
ENSG00000135018.14	UBQLN1
ENSG00000135046.14	ANXA1
ENSG00000135052.16	GOLM1
ENSG00000135069.14	PSAT1
ENSG00000135070.15	ISCA1
ENSG00000135108.15	FBXO21
ENSG00000135119.15	RNFT2
ENSG00000135164.19	DMTF1
ENSG00000135250.17	SRPK2
ENSG00000135269.18	TES
ENSG00000135314.12	KHDC1
ENSG00000135316.19	SYNCRIP
ENSG00000135318.12	NT5E
ENSG00000135387.21	CAPRIN1
ENSG00000135390.21	ATP5MC2
ENSG00000135446.17	CDK4
ENSG00000135452.10	TSPAN31
ENSG00000135454.14	B4GALNT1
ENSG00000135486.19	HNRNPA1
ENSG00000135535.17	CD164
ENSG00000135632.12	SMYD5
ENSG00000135677.11	GNS
ENSG00000135678.12	CPM
ENSG00000135679.25	MDM2
ENSG00000135720.13	DYNC1LI2
ENSG00000135821.19	GLUL
ENSG00000135823.14	STX6
ENSG00000135870.12	RC3H1
ENSG00000135916.16	ITM2C
ENSG00000135926.15	TMBIM1
ENSG00000135932.11	CAB39
ENSG00000135956.9	TMEM127
ENSG00000135966.13	TGFBRAP1
ENSG00000135974.10	C2orf49
ENSG00000136003.16	ISCU
ENSG00000136048.14	DRAM1
ENSG00000136100.14	VPS36
ENSG00000136108.15	CKAP2
ENSG00000136114.17	THSD1
ENSG00000136146.15	MED4
ENSG00000136159.4	NUDT15
ENSG00000136193.17	SCRN1
ENSG00000136231.14	IGF2BP3
ENSG00000136238.18	RAC1
ENSG00000136240.10	KDELR2
ENSG00000136247.15	ZDHHC4
ENSG00000136261.15	BZW2
ENSG00000136273.13	HUS1
ENSG00000136295.15	TTYH3
ENSG00000136379.12	ABHD17C
ENSG00000136381.13	IREB2
ENSG00000136436.15	CALCOCO2
ENSG00000136448.13	NMT1
ENSG00000136450.13	SRSF1
ENSG00000136451.9	VEZF1
ENSG00000136485.15	DCAF7
ENSG00000136504.13	KAT7
ENSG00000136527.18	TRA2B
ENSG00000136536.15	MARCHF7
ENSG00000136560.14	TANK
ENSG00000136699.19	SMPD4
ENSG00000136715.19	SAP130
ENSG00000136718.10	IMP4
ENSG00000136738.15	STAM
ENSG00000136754.18	ABI1
ENSG00000136758.19	YME1L1
ENSG00000136802.12	LRRC8A
ENSG00000136807.14	CDK9
ENSG00000136810.13	TXN
ENSG00000136819.15	C9orf78
ENSG00000136826.15	KLF4
ENSG00000136830.12	NIBAN2
ENSG00000136868.11	SLC31A1
ENSG00000136875.13	PRPF4
ENSG00000136888.8	ATP6V1G1
ENSG00000136891.14	TEX10
ENSG00000136897.8	MRPL50
ENSG00000136908.18	DPM2
ENSG00000136930.13	PSMB7
ENSG00000136938.9	ANP32B
ENSG00000136942.15	RPL35
ENSG00000136986.10	DERL1
ENSG00000136997.21	MYC
ENSG00000137073.23	UBAP2
ENSG00000137074.20	APTX
ENSG00000137075.18	RNF38
ENSG00000137154.13	RPS6
ENSG00000137168.8	PPIL1
ENSG00000137207.12	YIPF3
ENSG00000137309.20	HMGA1
ENSG00000137409.19	MTCH1
ENSG00000137414.6	FAM8A1
ENSG00000137509.11	PRCP
ENSG00000137547.9	MRPL15
ENSG00000137575.12	SDCBP
ENSG00000137693.14	YAP1
ENSG00000137710.17	RDX
ENSG00000137770.14	CTDSPL2
ENSG00000137804.14	NUSAP1
ENSG00000137814.12	HAUS2
ENSG00000137818.12	RPLP1
ENSG00000137819.14	PAQR5
ENSG00000137822.13	TUBGCP4
ENSG00000137845.15	ADAM10
ENSG00000137955.16	RABGGTB
ENSG00000137962.13	ARHGAP29
ENSG00000138018.18	SELENOI
ENSG00000138031.14	ADCY3
ENSG00000138069.18	RAB1A
ENSG00000138071.14	ACTR2
ENSG00000138078.16	PREPL
ENSG00000138079.14	SLC3A1
ENSG00000138085.17	ATRAID
ENSG00000138092.11	CENPO
ENSG00000138095.19	LRPPRC
ENSG00000138138.13	ATAD1
ENSG00000138166.6	DUSP5
ENSG00000138279.16	ANXA7
ENSG00000138286.15	FAM149B1
ENSG00000138326.21	RPS24
ENSG00000138386.17	NAB1
ENSG00000138430.16	OLA1
ENSG00000138434.17	ITPRID2
ENSG00000138443.17	ABI2
ENSG00000138592.14	USP8
ENSG00000138594.14	TMOD3
ENSG00000138614.15	INTS14
ENSG00000138660.12	AP1AR
ENSG00000138709.19	LARP1B
ENSG00000138750.15	NUP54
ENSG00000138757.15	G3BP2
ENSG00000138758.12	SEPTIN11
ENSG00000138759.19	FRAS1
ENSG00000138760.10	SCARB2
ENSG00000138802.11	SEC24B
ENSG00000138814.17	PPP3CA
ENSG00000139146.14	SINHCAF
ENSG00000139163.16	ETNK1
ENSG00000139218.18	SCAF11
ENSG00000139233.7	LLPH
ENSG00000139289.13	PHLDA1
ENSG00000139433.11	GLTP
ENSG00000139496.16	NUP58
ENSG00000139514.13	SLC7A1
ENSG00000139624.14	CERS5
ENSG00000139625.13	MAP3K12
ENSG00000139644.13	TMBIM6
ENSG00000139684.15	ESD
ENSG00000139718.11	SETD1B
ENSG00000139722.7	VPS37B
ENSG00000139725.8	RHOF
ENSG00000139746.16	RBM26
ENSG00000139793.18	MBNL2
ENSG00000139826.6	ABHD13
ENSG00000139921.13	TMX1
ENSG00000139977.14	NAA30
ENSG00000140157.15	NIPA2
ENSG00000140199.13	SLC12A6
ENSG00000140259.7	MFAP1
ENSG00000140262.18	TCF12
ENSG00000140263.15	SORD
ENSG00000140264.21	SERF2
ENSG00000140265.12	ZSCAN29
ENSG00000140297.13	GCNT3
ENSG00000140299.13	BNIP2
ENSG00000140307.11	GTF2A2
ENSG00000140319.11	SRP14
ENSG00000140350.15	ANP32A
ENSG00000140382.15	HMG20A
ENSG00000140391.15	TSPAN3
ENSG00000140450.9	ARRDC4
ENSG00000140455.17	USP3
ENSG00000140497.16	SCAMP2
ENSG00000140526.18	ABHD2
ENSG00000140577.16	CRTC3
ENSG00000140612.14	SEC11A
ENSG00000140718.21	FTO
ENSG00000140740.11	UQCRC2
ENSG00000140750.17	ARHGAP17
ENSG00000140832.10	MARVELD3
ENSG00000140941.14	MAP1LC3B
ENSG00000140948.13	ZCCHC14
ENSG00000140988.16	RPS2
ENSG00000140992.19	PDPK1
ENSG00000140995.17	DEF8
ENSG00000141027.21	NCOR1
ENSG00000141034.10	GID4
ENSG00000141076.18	UTP4
ENSG00000141101.13	NOB1
ENSG00000141198.16	TOM1L1
ENSG00000141219.15	C17orf80
ENSG00000141232.5	TOB1
ENSG00000141367.12	CLTC
ENSG00000141378.15	PTRH2
ENSG00000141380.14	SS18
ENSG00000141404.17	GNAL
ENSG00000141424.13	SLC39A6
ENSG00000141425.18	RPRD1A
ENSG00000141429.13	GALNT1
ENSG00000141441.16	GAREM1
ENSG00000141480.18	ARRB2
ENSG00000141510.18	TP53
ENSG00000141522.12	ARHGDIA
ENSG00000141526.17	SLC16A3
ENSG00000141543.12	EIF4A3
ENSG00000141551.14	CSNK1D
ENSG00000141560.15	FN3KRP
ENSG00000141568.21	FOXK2
ENSG00000141569.12	TRIM65
ENSG00000141576.16	RNF157
ENSG00000141580.16	WDR45B
ENSG00000141646.14	SMAD4
ENSG00000141682.12	PMAIP1
ENSG00000141699.11	RETREG3
ENSG00000141759.15	TXNL4A
ENSG00000141858.12	SAMD1
ENSG00000141867.18	BRD4
ENSG00000141905.19	NFIC
ENSG00000141979.4	AC008764.1
ENSG00000142082.15	SIRT3
ENSG00000142089.16	IFITM3
ENSG00000142166.13	IFNAR1
ENSG00000142168.15	SOD1
ENSG00000142188.17	TMEM50B
ENSG00000142192.21	APP
ENSG00000142230.13	SAE1
ENSG00000142396.10	ERVK3-1
ENSG00000142534.7	RPS11
ENSG00000142541.18	RPL13A
ENSG00000142599.19	RERE
ENSG00000142627.13	EPHA2
ENSG00000142657.21	PGD
ENSG00000142669.15	SH3BGRL3
ENSG00000142676.14	RPL11
ENSG00000142864.15	SERBP1
ENSG00000142867.14	BCL10
ENSG00000142875.19	PRKACB
ENSG00000142892.15	PIGK
ENSG00000142937.12	RPS8
ENSG00000142949.17	PTPRF
ENSG00000143079.15	CTTNBP2NL
ENSG00000143106.13	PSMA5
ENSG00000143153.13	ATP1B1
ENSG00000143157.12	POGK
ENSG00000143162.9	CREG1
ENSG00000143179.16	UCK2
ENSG00000143183.18	TMCO1
ENSG00000143224.18	PPOX
ENSG00000143252.16	SDHC
ENSG00000143319.17	ISG20L2
ENSG00000143321.19	HDGF
ENSG00000143322.21	ABL2
ENSG00000143324.14	XPR1
ENSG00000143337.19	TOR1AIP1
ENSG00000143368.10	SF3B4
ENSG00000143384.14	MCL1
ENSG00000143390.18	RFX5
ENSG00000143398.20	PIP5K1A
ENSG00000143401.15	ANP32E
ENSG00000143418.20	CERS2
ENSG00000143436.11	MRPL9
ENSG00000143442.22	POGZ
ENSG00000143443.10	C1orf56
ENSG00000143457.11	GOLPH3L
ENSG00000143473.13	KCNH1
ENSG00000143543.15	JTB
ENSG00000143549.21	TPM3
ENSG00000143569.19	UBAP2L
ENSG00000143612.21	C1orf43
ENSG00000143614.10	GATAD2B
ENSG00000143621.17	ILF2
ENSG00000143727.16	ACP1
ENSG00000143742.14	SRP9
ENSG00000143751.10	SDE2
ENSG00000143756.12	FBXO28
ENSG00000143761.16	ARF1
ENSG00000143771.12	CNIH4
ENSG00000143811.19	PYCR2
ENSG00000143815.15	LBR
ENSG00000143870.13	PDIA6
ENSG00000143882.12	ATP6V1C2
ENSG00000143933.19	CALM2
ENSG00000143947.14	RPS27A
ENSG00000143951.16	WDPCP
ENSG00000143970.17	ASXL2
ENSG00000143977.14	SNRPG
ENSG00000144021.3	CIAO1
ENSG00000144043.12	TEX261
ENSG00000144063.4	MALL
ENSG00000144136.11	SLC20A1
ENSG00000144224.17	UBXN4
ENSG00000144228.9	SPOPL
ENSG00000144229.12	THSD7B
ENSG00000144233.10	AMMECR1L
ENSG00000144283.22	PKP4
ENSG00000144290.17	SLC4A10
ENSG00000144366.16	GULP1
ENSG00000144381.18	HSPD1
ENSG00000144468.17	RHBDD1
ENSG00000144560.15	VGLL4
ENSG00000144566.11	RAB5A
ENSG00000144579.8	CTDSP1
ENSG00000144580.14	CNOT9
ENSG00000144597.14	EAF1
ENSG00000144649.9	GASK1A
ENSG00000144659.13	SLC25A38
ENSG00000144674.16	GOLGA4
ENSG00000144711.16	IQSEC1
ENSG00000144712.12	CAND2
ENSG00000144713.13	RPL32
ENSG00000144724.20	PTPRG
ENSG00000144746.7	ARL6IP5
ENSG00000144791.10	LIMD1
ENSG00000144820.8	ADGRG7
ENSG00000144824.21	PHLDB2
ENSG00000144827.9	ABHD10
ENSG00000144840.10	RABL3
ENSG00000144848.11	ATG3
ENSG00000144867.13	SRPRB
ENSG00000144895.12	EIF2A
ENSG00000145012.13	LPP
ENSG00000145242.13	EPHA5
ENSG00000145244.12	CORIN
ENSG00000145293.16	ENOPH1
ENSG00000145332.14	KLHL8
ENSG00000145337.5	PYURF
ENSG00000145349.17	CAMK2D
ENSG00000145386.11	CCNA2
ENSG00000145391.13	SETD7
ENSG00000145414.9	NAF1
ENSG00000145416.13	MARCHF1
ENSG00000145439.12	CBR4
ENSG00000145495.16	MARCHF6
ENSG00000145592.14	RPL37
ENSG00000145623.13	OSMR
ENSG00000145632.15	PLK2
ENSG00000145730.20	PAM
ENSG00000145741.16	BTF3
ENSG00000145780.8	FEM1C
ENSG00000145782.13	ATG12
ENSG00000145817.17	YIPF5
ENSG00000145907.16	G3BP1
ENSG00000146007.11	ZMAT2
ENSG00000146066.3	HIGD2A
ENSG00000146072.6	TNFRSF21
ENSG00000146109.5	ABT1
ENSG00000146147.15	MLIP
ENSG00000146223.16	RPL7L1
ENSG00000146242.9	TPBG
ENSG00000146263.11	MMS22L
ENSG00000146278.11	PNRC1
ENSG00000146376.11	ARHGAP18
ENSG00000146425.11	DYNLT1
ENSG00000146457.16	WTAP
ENSG00000146535.14	GNA12
ENSG00000146648.19	EGFR
ENSG00000146670.10	CDCA5
ENSG00000146676.10	PURB
ENSG00000146729.10	NIPSNAP2
ENSG00000146731.11	CCT6A
ENSG00000146834.14	MEPCE
ENSG00000146842.17	TMEM209
ENSG00000146859.6	TMEM140
ENSG00000146872.18	TLK2
ENSG00000146963.18	LUC7L2
ENSG00000147044.22	CASK
ENSG00000147065.17	MSN
ENSG00000147164.12	SNX12
ENSG00000147224.13	PRPS1
ENSG00000147274.14	RBMX
ENSG00000147324.11	MFHAS1
ENSG00000147400.10	CETN2
ENSG00000147403.18	RPL10
ENSG00000147416.11	ATP6V1B2
ENSG00000147419.19	CCDC25
ENSG00000147457.14	CHMP7
ENSG00000147471.12	PLPBP
ENSG00000147526.20	TACC1
ENSG00000147533.17	GOLGA7
ENSG00000147548.17	NSD3
ENSG00000147649.10	MTDH
ENSG00000147654.15	EBAG9
ENSG00000147669.11	POLR2K
ENSG00000147676.14	MAL2
ENSG00000147677.11	EIF3H
ENSG00000147679.12	UTP23
ENSG00000147799.11	ARHGAP39
ENSG00000147853.17	AK3
ENSG00000147905.18	ZCCHC7
ENSG00000147955.17	SIGMAR1
ENSG00000148110.16	MFSD14B
ENSG00000148154.10	UGCG
ENSG00000148175.13	STOM
ENSG00000148187.18	MRRF
ENSG00000148219.17	ASTN2
ENSG00000148229.13	POLE3
ENSG00000148248.14	SURF4
ENSG00000148337.21	CIZ1
ENSG00000148411.8	NACC2
ENSG00000148429.14	USP6NL
ENSG00000148468.17	FAM171A1
ENSG00000148484.18	RSU1
ENSG00000148672.9	GLUD1
ENSG00000148680.16	HTR7
ENSG00000148730.7	EIF4EBP2
ENSG00000148737.17	TCF7L2
ENSG00000148773.14	MKI67
ENSG00000148835.11	TAF5
ENSG00000148840.11	PPRC1
ENSG00000148842.18	CNNM2
ENSG00000148943.12	LIN7C
ENSG00000149084.13	HSD17B12
ENSG00000149136.9	SSRP1
ENSG00000149187.18	CELF1
ENSG00000149218.5	ENDOD1
ENSG00000149273.15	RPS3
ENSG00000149313.11	AASDHPPT
ENSG00000149346.15	SLX4IP
ENSG00000149357.10	LAMTOR1
ENSG00000149380.12	P4HA3
ENSG00000149428.19	HYOU1
ENSG00000149485.19	FADS1
ENSG00000149532.16	CPSF7
ENSG00000149547.15	EI24
ENSG00000149554.13	CHEK1
ENSG00000149557.14	FEZ1
ENSG00000149639.15	SOGA1
ENSG00000149658.18	YTHDF1
ENSG00000149716.13	LTO1
ENSG00000149792.9	MRPL49
ENSG00000149925.22	ALDOA
ENSG00000149948.14	HMGA2
ENSG00000149970.16	CNKSR2
ENSG00000150051.14	MKX
ENSG00000150054.18	MPP7
ENSG00000150093.20	ITGB1
ENSG00000150455.13	TIRAP
ENSG00000150712.11	MTMR12
ENSG00000150753.12	CCT5
ENSG00000150760.13	DOCK1
ENSG00000150867.14	PIP4K2A
ENSG00000151135.10	TMEM263
ENSG00000151208.17	DLG5
ENSG00000151239.14	TWF1
ENSG00000151247.12	EIF4E
ENSG00000151292.17	CSNK1G3
ENSG00000151364.17	KCTD14
ENSG00000151414.15	NEK7
ENSG00000151422.13	FER
ENSG00000151465.14	CDC123
ENSG00000151491.14	EPS8
ENSG00000151552.12	QDPR
ENSG00000151665.13	PIGF
ENSG00000151693.11	ASAP2
ENSG00000151748.15	SAV1
ENSG00000151846.8	PABPC3
ENSG00000151893.15	CACUL1
ENSG00000151914.20	DST
ENSG00000151923.17	TIAL1
ENSG00000151929.10	BAG3
ENSG00000152056.17	AP1S3
ENSG00000152102.18	FAM168B
ENSG00000152104.12	PTPN14
ENSG00000152234.16	ATP5F1A
ENSG00000152242.11	C18orf25
ENSG00000152270.9	PDE3B
ENSG00000152291.14	TGOLN2
ENSG00000152332.16	UHMK1
ENSG00000152348.16	ATG10
ENSG00000152409.9	JMY
ENSG00000152422.16	XRCC4
ENSG00000152484.14	USP12
ENSG00000152518.8	ZFP36L2
ENSG00000152520.14	PAN3
ENSG00000152556.17	PFKM
ENSG00000152558.15	TMEM123
ENSG00000152601.17	MBNL1
ENSG00000152683.14	SLC30A6
ENSG00000152700.14	SAR1B
ENSG00000152767.17	FARP1
ENSG00000152939.17	MARVELD2
ENSG00000152944.9	MED21
ENSG00000153006.16	SREK1IP1
ENSG00000153037.15	SRP19
ENSG00000153130.17	SCOC
ENSG00000153147.6	SMARCA5
ENSG00000153162.9	BMP6
ENSG00000153179.13	RASSF3
ENSG00000153187.20	HNRNPU
ENSG00000153201.16	RANBP2
ENSG00000153207.16	AHCTF1
ENSG00000153234.15	NR4A2
ENSG00000153310.19	CYRIB
ENSG00000153317.15	ASAP1
ENSG00000153551.14	CMTM7
ENSG00000153558.16	FBXL2
ENSG00000153560.12	UBP1
ENSG00000153561.13	RMND5A
ENSG00000153815.16	CMIP
ENSG00000153879.9	CEBPG
ENSG00000153904.21	DDAH1
ENSG00000153914.16	SREK1
ENSG00000153922.11	CHD1
ENSG00000153936.17	HS2ST1
ENSG00000153944.12	MSI2
ENSG00000153989.8	NUS1
ENSG00000154001.14	PPP2R5E
ENSG00000154122.14	ANKH
ENSG00000154144.13	TBRG1
ENSG00000154162.15	CDH12
ENSG00000154174.8	TOMM70
ENSG00000154380.17	ENAH
ENSG00000154447.15	SH3RF1
ENSG00000154473.18	BUB3
ENSG00000154511.12	DIPK1A
ENSG00000154518.10	ATP5MC3
ENSG00000154582.17	ELOC
ENSG00000154639.19	CXADR
ENSG00000154642.11	C21orf91
ENSG00000154710.18	RABGEF1
ENSG00000154723.12	ATP5PF
ENSG00000154727.11	GABPA
ENSG00000154813.10	DPH3
ENSG00000154920.15	EME1
ENSG00000154945.7	ANKRD40
ENSG00000154978.13	VOPP1
ENSG00000155026.16	RSPH10B
ENSG00000155090.15	KLF10
ENSG00000155097.12	ATP6V1C1
ENSG00000155189.12	AGPAT5
ENSG00000155229.21	MMS19
ENSG00000155252.13	PI4K2A
ENSG00000155254.13	MARVELD1
ENSG00000155304.6	HSPA13
ENSG00000155366.17	RHOC
ENSG00000155380.12	SLC16A1
ENSG00000155438.12	NIFK
ENSG00000155463.14	OXA1L
ENSG00000155506.18	LARP1
ENSG00000155876.6	RRAGA
ENSG00000155903.13	RASA2
ENSG00000155959.12	VBP1
ENSG00000155962.13	CLIC2
ENSG00000155975.10	VPS37A
ENSG00000156136.10	DCK
ENSG00000156162.16	DPY19L4
ENSG00000156170.13	NDUFAF6
ENSG00000156273.16	BACH1
ENSG00000156299.13	TIAM1
ENSG00000156411.10	ATP5MPL
ENSG00000156467.10	UQCRB
ENSG00000156471.13	PTDSS1
ENSG00000156482.11	RPL30
ENSG00000156504.16	FAM122B
ENSG00000156508.19	EEF1A1
ENSG00000156531.17	PHF6
ENSG00000156599.11	ZDHHC5
ENSG00000156639.12	ZFAND3
ENSG00000156642.17	NPTN
ENSG00000156650.14	KAT6B
ENSG00000156687.11	UNC5D
ENSG00000156711.17	MAPK13
ENSG00000156735.11	BAG4
ENSG00000156853.13	ZNF689
ENSG00000156875.14	MFSD14A
ENSG00000156928.5	MALSU1
ENSG00000156976.17	EIF4A2
ENSG00000157014.11	TATDN2
ENSG00000157106.17	SMG1
ENSG00000157107.14	FCHO2
ENSG00000157212.19	PAXIP1
ENSG00000157224.16	CLDN12
ENSG00000157450.16	RNF111
ENSG00000157538.14	VPS26C
ENSG00000157540.22	DYRK1A
ENSG00000157593.19	SLC35B2
ENSG00000157625.15	TAB3
ENSG00000157654.19	PALM2AKAP2
ENSG00000157657.14	ZNF618
ENSG00000157734.14	SNX22
ENSG00000157800.18	SLC37A3
ENSG00000157823.17	AP3S2
ENSG00000157837.16	SPPL3
ENSG00000157916.20	RER1
ENSG00000157933.10	SKI
ENSG00000157954.15	WIPI2
ENSG00000157985.19	AGAP1
ENSG00000158042.9	MRPL17
ENSG00000158062.20	UBXN11
ENSG00000158109.15	TPRG1L
ENSG00000158125.10	XDH
ENSG00000158161.16	EYA3
ENSG00000158169.13	FANCC
ENSG00000158195.11	WASF2
ENSG00000158290.18	CUL4B
ENSG00000158417.11	EIF5B
ENSG00000158435.8	CNOT11
ENSG00000158470.5	B4GALT5
ENSG00000158480.11	SPATA2
ENSG00000158604.15	TMED4
ENSG00000158615.9	PPP1R15B
ENSG00000158636.16	EMSY
ENSG00000158710.15	TAGLN2
ENSG00000158711.14	ELK4
ENSG00000158747.15	NBL1
ENSG00000158769.18	F11R
ENSG00000158828.8	PINK1
ENSG00000158850.15	B4GALT3
ENSG00000158985.14	CDC42SE2
ENSG00000159111.13	MRPL10
ENSG00000159128.15	IFNGR2
ENSG00000159131.17	GART
ENSG00000159202.18	UBE2Z
ENSG00000159216.19	RUNX1
ENSG00000159239.13	AC005041.1
ENSG00000159314.11	ARHGAP27
ENSG00000159335.18	PTMS
ENSG00000159346.13	ADIPOR1
[truncated: 1,262 more rows]

## Sheet: RNase_T1_1_1
#HCT116, PAR-CLIP, RNase T1, in-lysate 1 U/μL, on-bead 1 U/μL, this study
ENSEMBL	SYMBOL
ENSG00000002587.10	HS3ST1
ENSG00000002834.18	LASP1
ENSG00000003249.15	DBNDD1
ENSG00000003436.16	TFPI
ENSG00000004142.12	POLDIP2
ENSG00000004455.17	AK2
ENSG00000004478.8	FKBP4
ENSG00000005020.13	SKAP2
ENSG00000005100.13	DHX33
ENSG00000005156.12	LIG3
ENSG00000005249.13	PRKAR2B
ENSG00000005339.15	CREBBP
ENSG00000005436.14	GCFC2
ENSG00000005483.21	KMT2E
ENSG00000005801.18	ZNF195
ENSG00000005810.18	MYCBP2
ENSG00000006432.15	MAP3K9
ENSG00000006459.11	KDM7A
ENSG00000006468.14	ETV1
ENSG00000006634.8	DBF4
ENSG00000006831.10	ADIPOR2
ENSG00000007168.14	PAFAH1B1
ENSG00000008083.14	JARID2
ENSG00000008282.9	SYPL1
ENSG00000008283.16	CYB561
ENSG00000008988.11	RPS20
ENSG00000009335.18	UBE3C
ENSG00000009413.16	REV3L
ENSG00000010017.13	RANBP9
ENSG00000010244.19	ZNF207
ENSG00000010270.14	STARD3NL
ENSG00000010404.18	IDS
ENSG00000010704.18	HFE
ENSG00000011295.16	TTC19
ENSG00000011347.10	SYT7
ENSG00000011451.21	WIZ
ENSG00000011523.14	CEP68
ENSG00000012211.13	PRICKLE3
ENSG00000012822.16	CALCOCO1
ENSG00000013306.16	SLC25A39
ENSG00000013588.9	GPRC5A
ENSG00000014919.13	COX15
ENSG00000015475.19	BID
ENSG00000015479.20	MATR3
ENSG00000017797.13	RALBP1
ENSG00000018510.17	AGPS
ENSG00000019186.10	CYP24A1
ENSG00000021826.17	CPS1
ENSG00000023191.17	RNH1
ENSG00000023287.13	RB1CC1
ENSG00000023516.9	AKAP11
ENSG00000024422.12	EHD2
ENSG00000025039.15	RRAGD
ENSG00000028839.10	TBPL1
ENSG00000029363.17	BCLAF1
ENSG00000033050.9	ABCF2
ENSG00000033800.14	PIAS1
ENSG00000033867.16	SLC4A7
ENSG00000034677.13	RNF19A
ENSG00000035403.18	VCL
ENSG00000035862.12	TIMP2
ENSG00000036054.13	TBC1D23
ENSG00000036257.13	CUL3
ENSG00000036549.13	ZZZ3
ENSG00000037749.12	MFAP3
ENSG00000038427.16	VCAN
ENSG00000038945.15	MSR1
ENSG00000043093.15	DCUN1D1
ENSG00000043143.20	JADE2
ENSG00000048392.12	RRM2B
ENSG00000049449.10	RCN1
ENSG00000050393.11	MCUR1
ENSG00000050405.13	LIMA1
ENSG00000050426.16	LETMD1
ENSG00000052723.12	SIKE1
ENSG00000053524.12	MCF2L2
ENSG00000053770.12	AP5M1
ENSG00000054598.9	FOXC1
ENSG00000054965.11	FAM168A
ENSG00000055130.17	CUL1
ENSG00000055332.18	EIF2AK2
ENSG00000055609.19	KMT2C
ENSG00000056097.16	ZFR
ENSG00000056586.16	RC3H2
ENSG00000058063.16	ATP11B
ENSG00000058668.15	ATP2B4
ENSG00000059122.17	FLYWCH1
ENSG00000059728.11	MXD1
ENSG00000059758.8	CDK17
ENSG00000059769.20	DNAJC25
ENSG00000060138.13	YBX3
ENSG00000060237.18	WNK1
ENSG00000060339.14	CCAR1
ENSG00000060749.16	QSER1
ENSG00000061676.15	NCKAP1
ENSG00000062194.16	GPBP1
ENSG00000062725.10	APPBP2
ENSG00000063177.13	RPL18
ENSG00000063587.15	ZNF275
ENSG00000064115.11	TM7SF3
ENSG00000064313.12	TAF2
ENSG00000064419.13	TNPO3
ENSG00000064651.14	SLC12A2
ENSG00000065060.17	UHRF1BP1
ENSG00000065308.5	TRAM2
ENSG00000065361.16	ERBB3
ENSG00000065526.12	SPEN
ENSG00000065613.15	SLK
ENSG00000065621.15	GSTO2
ENSG00000065833.9	ME1
ENSG00000065923.10	SLC9A7
ENSG00000065970.9	FOXJ2
ENSG00000066044.15	ELAVL1
ENSG00000066117.15	SMARCD1
ENSG00000066422.5	ZBTB11
ENSG00000066926.12	FECH
ENSG00000066933.16	MYO9A
ENSG00000067177.15	PHKA1
ENSG00000067369.14	TP53BP1
ENSG00000067955.15	CBFB
ENSG00000067992.16	PDK3
ENSG00000068366.20	ACSL4
ENSG00000068654.16	POLR1A
ENSG00000068697.7	LAPTM4A
ENSG00000069329.18	VPS35
ENSG00000069345.12	DNAJA2
ENSG00000070018.9	LRP6
ENSG00000070214.16	SLC44A1
ENSG00000070367.16	EXOC5
ENSG00000070476.15	ZXDC
ENSG00000070614.15	NDST1
ENSG00000070718.12	AP3M2
ENSG00000070756.17	PABPC1
ENSG00000070770.10	CSNK2A2
ENSG00000071189.21	SNX13
ENSG00000071242.12	RPS6KA2
ENSG00000071243.16	ING3
ENSG00000071564.17	TCF3
ENSG00000071909.19	MYO3B
ENSG00000071967.12	CYBRD1
ENSG00000071994.11	PDCD2
ENSG00000072042.13	RDH11
ENSG00000072071.16	ADGRL1
ENSG00000072110.15	ACTN1
ENSG00000072210.19	ALDH3A2
ENSG00000072274.13	TFRC
ENSG00000072401.15	UBE2D1
ENSG00000072415.10	MPP5
ENSG00000072501.19	SMC1A
ENSG00000072736.19	NFATC3
ENSG00000072803.17	FBXW11
ENSG00000073008.15	PVR
ENSG00000073584.20	SMARCE1
ENSG00000073803.14	MAP3K13
ENSG00000074211.14	PPP2R2C
ENSG00000074356.17	NCBP3
ENSG00000074695.6	LMAN1
ENSG00000074696.13	HACD3
ENSG00000074800.16	ENO1
ENSG00000075043.19	KCNQ2
ENSG00000075142.14	SRI
ENSG00000075151.21	EIF4G3
ENSG00000075340.23	ADD2
ENSG00000075407.18	ZNF37A
ENSG00000075415.13	SLC25A3
ENSG00000075568.17	TMEM131
ENSG00000075618.18	FSCN1
ENSG00000075624.17	ACTB
ENSG00000076258.10	FMO4
ENSG00000076321.11	KLHL20
ENSG00000077147.16	TM9SF3
ENSG00000077549.19	CAPZB
ENSG00000077585.14	GPR137B
ENSG00000078124.12	ACER3
ENSG00000078237.7	TIGAR
ENSG00000078304.19	PPP2R5C
ENSG00000078369.18	GNB1
ENSG00000078668.14	VDAC3
ENSG00000078747.16	ITCH
ENSG00000079246.16	XRCC5
ENSG00000079332.15	SAR1A
ENSG00000079387.14	SENP1
ENSG00000079739.17	PGM1
ENSG00000080345.18	RIF1
ENSG00000080603.17	SRCAP
ENSG00000080608.10	PUM3
ENSG00000080802.19	CNOT4
ENSG00000080819.9	CPOX
ENSG00000080824.19	HSP90AA1
ENSG00000081019.13	RSBN1
ENSG00000081154.12	PCNP
ENSG00000081177.18	EXD2
ENSG00000081181.8	ARG2
ENSG00000082213.18	C5orf22
ENSG00000082258.13	CCNT2
ENSG00000082641.16	NFE2L1
ENSG00000082898.18	XPO1
ENSG00000082996.20	RNF13
ENSG00000083312.17	TNPO1
ENSG00000083520.15	DIS3
ENSG00000083844.10	ZNF264
ENSG00000083845.9	RPS5
ENSG00000083857.14	FAT1
ENSG00000083937.10	CHMP2B
ENSG00000084072.17	PPIE
ENSG00000084073.10	ZMPSTE24
ENSG00000084090.13	STARD7
ENSG00000084093.19	REST
ENSG00000084112.15	SSH1
ENSG00000084652.16	TXLNA
ENSG00000084693.16	AGBL5
ENSG00000085063.17	CD59
ENSG00000085231.14	AK6
ENSG00000085415.16	SEH1L
ENSG00000085449.15	WDFY1
ENSG00000085832.17	EPS15
ENSG00000085871.9	MGST2
ENSG00000085978.22	ATG16L1
ENSG00000086065.14	CHMP5
ENSG00000086232.13	EIF2AK1
ENSG00000086300.16	SNX10
ENSG00000086475.15	SEPHS1
ENSG00000086589.12	RBM22
ENSG00000086598.11	TMED2
ENSG00000086666.19	ZFAND6
ENSG00000086758.16	HUWE1
ENSG00000087053.20	MTMR2
ENSG00000087086.15	FTL
ENSG00000087263.17	OGFOD1
ENSG00000087274.17	ADD1
ENSG00000087338.5	GMCL1
ENSG00000088247.17	KHSRP
ENSG00000088812.18	ATRN
ENSG00000088832.18	FKBP1A
ENSG00000088888.18	MAVS
ENSG00000089006.17	SNX5
ENSG00000089009.15	RPL6
ENSG00000089050.16	RBBP9
ENSG00000089063.15	TMEM230
ENSG00000089157.16	RPLP0
ENSG00000089159.16	PXN
ENSG00000089234.16	BRAP
ENSG00000089737.17	DDX24
ENSG00000089916.18	GPATCH2L
ENSG00000090061.17	CCNK
ENSG00000090266.13	NDUFB2
ENSG00000090612.22	ZNF268
ENSG00000090615.15	GOLGA3
ENSG00000090857.14	PDPR
ENSG00000090863.12	GLG1
ENSG00000090905.19	TNRC6A
ENSG00000091009.8	RBM27
ENSG00000091039.17	OSBPL8
ENSG00000091140.14	DLD
ENSG00000091157.14	WDR7
ENSG00000091164.13	TXNL1
ENSG00000091317.8	CMTM6
ENSG00000091542.9	ALKBH5
ENSG00000092148.13	HECTD1
ENSG00000092199.18	HNRNPC
ENSG00000092201.10	SUPT16H
ENSG00000092203.15	TOX4
ENSG00000092531.10	SNAP23
ENSG00000092820.18	EZR
ENSG00000092847.13	AGO1
ENSG00000093000.19	NUP50
ENSG00000093144.19	ECHDC1
ENSG00000093183.14	SEC22C
ENSG00000094916.16	CBX5
ENSG00000095015.6	MAP3K1
ENSG00000095261.14	PSMD5
ENSG00000095574.12	IKZF5
ENSG00000095787.23	WAC
ENSG00000096060.15	FKBP5
ENSG00000096070.19	BRPF3
ENSG00000096093.16	EFHC1
ENSG00000096384.20	HSP90AB1
ENSG00000096401.8	CDC5L
ENSG00000096696.14	DSP
ENSG00000099381.18	SETD1A
ENSG00000099942.13	CRKL
ENSG00000100030.15	MAPK1
ENSG00000100129.18	EIF3L
ENSG00000100147.14	CCDC134
ENSG00000100216.6	TOMM22
ENSG00000100219.16	XBP1
ENSG00000100221.10	JOSD1
ENSG00000100225.18	FBXO7
ENSG00000100335.15	MIEF1
ENSG00000100345.22	MYH9
ENSG00000100354.21	TNRC6B
ENSG00000100393.14	EP300
ENSG00000100410.8	PHF5A
ENSG00000100412.17	ACO2
ENSG00000100418.8	DESI1
ENSG00000100426.7	ZBED4
ENSG00000100441.10	KHNYN
ENSG00000100478.15	AP4S1
ENSG00000100522.10	GNPNAT1
ENSG00000100528.12	CNIH1
ENSG00000100554.12	ATP6V1D
ENSG00000100568.11	VTI1B
ENSG00000100580.8	TMED8
ENSG00000100596.7	SPTLC2
ENSG00000100625.9	SIX4
ENSG00000100697.15	DICER1
ENSG00000100731.16	PCNX1
ENSG00000100744.15	GSKIP
ENSG00000100784.12	RPS6KA5
ENSG00000100804.19	PSMB5
ENSG00000100811.14	YY1
ENSG00000100823.12	APEX1
ENSG00000100941.9	PNN
ENSG00000101052.13	IFT52
ENSG00000101079.21	NDRG3
ENSG00000101084.18	RAB5IF
ENSG00000101126.18	ADNP
ENSG00000101166.16	PRELID3B
ENSG00000101188.5	NTSR1
ENSG00000101255.11	TRIB3
ENSG00000101290.14	CDS2
ENSG00000101311.16	FERMT1
ENSG00000101350.8	KIF3B
ENSG00000101363.12	MANBAL
ENSG00000101413.12	RPRD1B
ENSG00000101439.9	CST3
ENSG00000101440.9	ASIP
ENSG00000101493.11	ZNF516
ENSG00000101557.15	USP14
ENSG00000101558.14	VAPA
ENSG00000101608.13	MYL12A
ENSG00000101654.18	RNMT
ENSG00000101773.19	RBBP8
ENSG00000101849.17	TBL1X
ENSG00000101871.16	MID1
ENSG00000101888.12	NXT2
ENSG00000101911.13	PRPS2
ENSG00000101935.10	AMMECR1
ENSG00000101966.13	XIAP
ENSG00000101972.19	STAG2
ENSG00000102007.11	PLP2
ENSG00000102119.11	EMD
ENSG00000102158.20	MAGT1
ENSG00000102225.16	CDK16
ENSG00000102309.15	PIN4
ENSG00000102317.18	RBM3
ENSG00000102531.16	FNDC3A
ENSG00000102554.14	KLF5
ENSG00000102753.10	KPNA3
ENSG00000102804.15	TSC22D1
ENSG00000102898.12	NUTF2
ENSG00000102978.13	POLR2C
ENSG00000103018.17	CYB5B
ENSG00000103021.9	CCDC113
ENSG00000103023.12	PRSS54
ENSG00000103035.11	PSMD7
ENSG00000103044.11	HAS3
ENSG00000103061.13	SLC7A6OS
ENSG00000103064.15	SLC7A6
ENSG00000103160.12	HSDL1
ENSG00000103194.16	USP10
ENSG00000103202.13	NME4
ENSG00000103222.20	ABCC1
ENSG00000103257.9	SLC7A5
ENSG00000103275.21	UBE2I
ENSG00000103353.16	UBFD1
ENSG00000103404.14	USP31
ENSG00000103429.11	BFAR
ENSG00000103502.14	CDIPT
ENSG00000103740.10	ACSBG1
ENSG00000103769.10	RAB11A
ENSG00000103855.18	CD276
ENSG00000104047.15	DTWD1
ENSG00000104067.17	TJP1
ENSG00000104131.13	EIF3J
ENSG00000104133.15	SPG11
ENSG00000104219.13	ZDHHC2
ENSG00000104231.11	ZFAND1
ENSG00000104312.8	RIPK2
ENSG00000104320.14	NBN
ENSG00000104341.17	LAPTM4B
ENSG00000104369.5	JPH1
ENSG00000104419.17	NDRG1
ENSG00000104432.14	IL7
ENSG00000104450.13	SPAG1
ENSG00000104472.10	CHRAC1
ENSG00000104635.15	SLC39A14
ENSG00000104643.10	MTMR9
ENSG00000104660.19	LEPROTL1
ENSG00000104689.10	TNFRSF10A
ENSG00000104691.16	UBXN8
ENSG00000104695.13	PPP2CB
ENSG00000104812.15	GYS1
ENSG00000104824.17	HNRNPL
ENSG00000104904.12	OAZ1
ENSG00000105176.18	URI1
ENSG00000105186.16	ANKRD27
ENSG00000105220.17	GPI
ENSG00000105245.9	NUMBL
ENSG00000105438.9	KDELR1
ENSG00000105483.18	CARD8
ENSG00000105514.8	RAB3D
ENSG00000105647.19	PIK3R2
ENSG00000105723.13	GSK3A
ENSG00000105778.19	AVL9
ENSG00000105810.10	CDK6
ENSG00000105877.18	DNAH11
ENSG00000105889.16	STEAP1B
ENSG00000105926.16	MPP6
ENSG00000105939.13	ZC3HAV1
ENSG00000105968.19	H2AZ2
ENSG00000105971.15	CAV2
ENSG00000105976.16	MET
ENSG00000105993.15	DNAJB6
ENSG00000106049.9	HIBADH
ENSG00000106080.11	FKBP14
ENSG00000106244.13	PDAP1
ENSG00000106246.18	PTCD1
ENSG00000106261.17	ZKSCAN1
ENSG00000106344.8	RBM28
ENSG00000106346.11	USP42
ENSG00000106484.16	MEST
ENSG00000106588.12	PSMA2
ENSG00000106603.19	COA1
ENSG00000106609.16	TMEM248
ENSG00000106615.10	RHEB
ENSG00000106682.15	EIF4H
ENSG00000106692.15	FKTN
ENSG00000106701.13	FSD1L
ENSG00000106714.17	CNTNAP3
ENSG00000106723.17	SPIN1
ENSG00000106785.15	TRIM14
ENSG00000106853.20	PTGR1
ENSG00000107262.26	BAG1
ENSG00000107341.5	UBE2R2
ENSG00000107371.14	EXOSC3
ENSG00000107443.16	CCNJ
ENSG00000107651.13	SEC23IP
ENSG00000107669.18	ATE1
ENSG00000107771.17	CCSER2
ENSG00000107779.14	BMPR1A
ENSG00000107789.16	MINPP1
ENSG00000107798.18	LIPA
ENSG00000107816.17	LZTS2
ENSG00000107854.6	TNKS2
ENSG00000107862.6	GBF1
ENSG00000107929.15	LARP4B
ENSG00000107951.15	MTPAP
ENSG00000108021.20	TASOR2
ENSG00000108091.11	CCDC6
ENSG00000108100.18	CCNY
ENSG00000108107.15	RPL28
ENSG00000108262.16	GIT1
ENSG00000108424.11	KPNB1
ENSG00000108433.17	GOSR2
ENSG00000108439.11	PNPO
ENSG00000108443.14	RPS6KB1
ENSG00000108518.8	PFN1
ENSG00000108559.12	NUP88
ENSG00000108561.8	C1QBP
ENSG00000108654.16	DDX5
ENSG00000108679.13	LGALS3BP
ENSG00000108774.15	RAB5C
ENSG00000108829.10	LRRC59
ENSG00000108854.16	SMURF2
ENSG00000108960.9	MMD
ENSG00000109079.10	TNFAIP1
ENSG00000109084.14	TMEM97
ENSG00000109118.14	PHF12
ENSG00000109133.13	TMEM33
ENSG00000109171.15	SLAIN2
ENSG00000109180.15	OCIAD1
ENSG00000109265.14	CRACD
ENSG00000109270.13	LAMTOR3
ENSG00000109332.20	UBE2D3
ENSG00000109381.20	ELF2
ENSG00000109606.13	DHX15
ENSG00000109685.19	NSD2
ENSG00000109686.19	SH3D19
ENSG00000109689.18	STIM2
ENSG00000109787.13	KLF3
ENSG00000109814.12	UGDH
ENSG00000109854.14	HTATIP2
ENSG00000109971.14	HSPA8
ENSG00000110063.10	DCPS
ENSG00000110104.13	CCDC86
ENSG00000110107.9	PRPF19
ENSG00000110172.12	CHORDC1
ENSG00000110218.9	PANX1
ENSG00000110395.7	CBL
ENSG00000110400.11	NECTIN1
ENSG00000110651.12	CD81
ENSG00000110713.17	NUP98
ENSG00000110723.12	EXPH5
ENSG00000110906.13	KCTD10
ENSG00000110917.8	MLEC
ENSG00000111011.18	RSRC2
ENSG00000111142.14	METAP2
ENSG00000111145.8	ELK3
ENSG00000111186.13	WNT5B
ENSG00000111224.14	PARP11
ENSG00000111252.11	SH2B3
ENSG00000111266.9	DUSP16
ENSG00000111269.3	CREBL2
ENSG00000111300.10	NAA25
ENSG00000111319.13	SCNN1A
ENSG00000111371.16	SLC38A1
ENSG00000111412.6	SPRING1
ENSG00000111481.10	COPZ1
ENSG00000111530.13	CAND1
ENSG00000111640.15	GAPDH
ENSG00000111652.10	COPS7A
ENSG00000111669.15	TPI1
ENSG00000111670.16	GNPTAB
ENSG00000111707.12	SUDS3
ENSG00000111711.10	GOLT1B
ENSG00000111716.14	LDHB
ENSG00000111775.3	COX6A1
ENSG00000111780.8	AL021546.1
ENSG00000111875.8	ASF1A
ENSG00000111877.17	MCM9
ENSG00000111906.18	HDDC2
ENSG00000111907.21	TPD52L1
ENSG00000112031.16	MTRF1L
ENSG00000112062.11	MAPK14
ENSG00000112078.14	KCTD20
ENSG00000112079.9	STK38
ENSG00000112081.17	SRSF3
ENSG00000112110.10	MRPL18
ENSG00000112234.9	FBXL4
ENSG00000112242.15	E2F3
ENSG00000112414.15	ADGRG6
ENSG00000112419.14	PHACTR2
ENSG00000112531.17	QKI
ENSG00000112640.16	PPP2R5D
ENSG00000112697.17	TMEM30A
ENSG00000112759.19	SLC29A1
ENSG00000112996.11	MRPS30
ENSG00000113013.16	HSPA9
ENSG00000113163.18	CERT1
ENSG00000113328.19	CCNG1
ENSG00000113356.13	POLR3G
ENSG00000113369.9	ARRDC3
ENSG00000113552.16	GNPDA1
ENSG00000113575.10	PPP2CA
ENSG00000113594.10	LIFR
ENSG00000113615.13	SEC24A
ENSG00000113658.18	SMAD5
ENSG00000113712.19	CSNK1A1
ENSG00000113719.16	ERGIC1
ENSG00000113742.14	CPEB4
ENSG00000113811.11	SELENOK
ENSG00000114054.14	PCCB
ENSG00000114062.22	UBE3A
ENSG00000114120.14	SLC25A36
ENSG00000114209.15	PDCD10
ENSG00000114302.16	PRKAR2A
ENSG00000114353.17	GNAI2
ENSG00000114354.15	TFG
ENSG00000114416.18	FXR1
ENSG00000114573.10	ATP6V1A
ENSG00000114648.12	KLHL18
ENSG00000114686.9	MRPL3
ENSG00000114739.14	ACVR2B
ENSG00000114857.18	NKTR
ENSG00000114867.22	EIF4G1
ENSG00000114902.14	SPCS1
ENSG00000114999.8	TTL
ENSG00000115053.17	NCL
ENSG00000115107.20	STEAP3
ENSG00000115145.10	STAM2
ENSG00000115204.15	MPV17
ENSG00000115233.12	PSMD14
ENSG00000115310.18	RTN4
ENSG00000115364.14	MRPL19
ENSG00000115464.15	USP34
ENSG00000115484.15	CCT4
ENSG00000115504.15	EHBP1
ENSG00000115524.17	SF3B1
ENSG00000115568.16	ZNF142
ENSG00000115677.17	HDLBP
ENSG00000115760.14	BIRC6
ENSG00000115762.16	PLEKHB2
ENSG00000115816.15	CEBPZ
ENSG00000115875.19	SRSF7
ENSG00000115946.8	PNO1
ENSG00000115947.14	ORC4
ENSG00000115963.13	RND3
ENSG00000115966.17	ATF2
ENSG00000116030.17	SUMO1
ENSG00000116044.16	NFE2L2
ENSG00000116095.11	PLEKHA3
ENSG00000116127.19	ALMS1
ENSG00000116133.13	DHCR24
ENSG00000116209.12	TMEM59
ENSG00000116285.13	ERRFI1
ENSG00000116459.11	ATP5PB
ENSG00000116539.14	ASH1L
ENSG00000116560.11	SFPQ
ENSG00000116604.18	MEF2D
ENSG00000116698.21	SMG7
ENSG00000116918.15	TSNAX
ENSG00000116977.19	LGALS8
ENSG00000117000.9	RLF
ENSG00000117036.12	ETV3
ENSG00000117151.13	CTBS
ENSG00000117335.20	CD46
ENSG00000117394.24	SLC2A1
ENSG00000117450.15	PRDX1
ENSG00000117479.15	SLC19A2
ENSG00000117523.16	PRRC2C
ENSG00000117592.9	PRDX6
ENSG00000117597.18	UTP25
ENSG00000117602.13	RCAN3
ENSG00000117620.15	SLC35A3
ENSG00000117682.17	DHDDS
ENSG00000117713.20	ARID1A
ENSG00000117862.13	TXNDC12
ENSG00000117906.14	RCN2
ENSG00000118007.13	STAG1
ENSG00000118181.11	RPS25
ENSG00000118363.12	SPCS2
ENSG00000118482.12	PHF3
ENSG00000118496.5	FBXO30
ENSG00000118564.15	FBXL5
ENSG00000118579.13	MED28
ENSG00000118689.15	FOXO3
ENSG00000118816.11	CCNI
ENSG00000118900.15	UBN1
ENSG00000119048.8	UBE2B
ENSG00000119125.17	GDA
ENSG00000119231.11	SENP5
ENSG00000119285.11	HEATR1
ENSG00000119318.13	RAD23B
ENSG00000119328.12	ABITRAM
ENSG00000119335.17	SET
ENSG00000119402.17	FBXW2
ENSG00000119446.14	RBM18
ENSG00000119596.18	YLPM1
ENSG00000119682.17	AREL1
ENSG00000119760.16	SUPT7L
ENSG00000119801.13	YPEL5
ENSG00000119820.11	YIPF4
ENSG00000119888.11	EPCAM
ENSG00000119912.18	IDE
ENSG00000119929.13	CUTC
ENSG00000119950.21	MXI1
ENSG00000119969.15	HELLS
ENSG00000119977.21	TCTN3
ENSG00000120158.12	RCL1
ENSG00000120306.11	CYSTM1
ENSG00000120437.9	ACAT2
ENSG00000120438.12	TCP1
ENSG00000120685.20	PROSER1
ENSG00000120705.13	ETF1
ENSG00000120725.13	SIL1
ENSG00000120733.14	KDM3B
ENSG00000120742.11	SERP1
ENSG00000120805.14	ARL1
ENSG00000120820.12	GLT8D2
ENSG00000120889.13	TNFRSF10B
ENSG00000120992.18	LYPLA1
ENSG00000121060.18	TRIM25
ENSG00000121274.14	TENT4B
ENSG00000121380.12	BCL2L14
ENSG00000121644.19	DESI2
ENSG00000121864.10	ZNF639
ENSG00000121892.15	PDS5A
ENSG00000121931.16	LRIF1
ENSG00000122012.14	SV2C
ENSG00000122042.10	UBL3
ENSG00000122068.13	FYTTD1
ENSG00000122257.20	RBBP6
ENSG00000122406.14	RPL5
ENSG00000122432.18	SPATA1
ENSG00000122482.21	ZNF644
ENSG00000122484.9	RPAP2
ENSG00000122692.9	SMU1
ENSG00000122696.14	SLC25A51
ENSG00000122783.17	CYREN
ENSG00000122786.20	CALD1
ENSG00000123066.9	MED13L
ENSG00000123124.14	WWP1
ENSG00000123178.15	SPRYD7
ENSG00000123179.14	EBPL
ENSG00000123200.17	ZC3H13
ENSG00000123213.23	NLN
ENSG00000123416.15	TUBA1B
ENSG00000123505.19	AMD1
ENSG00000123562.18	MORF4L2
ENSG00000123575.9	FAM199X
ENSG00000123600.20	METTL8
ENSG00000123684.13	LPGAT1
ENSG00000123728.10	RAP2C
ENSG00000123739.11	PLA2G12A
ENSG00000123908.12	AGO2
ENSG00000123975.5	CKS2
ENSG00000123983.14	ACSL3
ENSG00000124098.10	FAM210B
ENSG00000124145.6	SDC4
ENSG00000124151.19	NCOA3
ENSG00000124160.12	NCOA5
ENSG00000124177.15	CHD6
ENSG00000124193.16	SRSF6
ENSG00000124198.9	ARFGEF2
ENSG00000124226.11	RNF114
ENSG00000124333.16	VAMP7
ENSG00000124333.16_PAR_Y	VAMP7
ENSG00000124380.11	SNRNP27
ENSG00000124593.16	AL365205.1
ENSG00000124733.5	MEA1
ENSG00000124749.17	COL21A1
ENSG00000124762.14	CDKN1A
ENSG00000124782.20	RREB1
ENSG00000124783.14	SSR1
ENSG00000124795.17	DEK
ENSG00000124831.19	LRRFIP1
ENSG00000124882.4	EREG
ENSG00000124920.14	MYRF
ENSG00000125107.18	CNOT1
ENSG00000125124.13	BBS2
ENSG00000125166.13	GOT2
ENSG00000125249.7	RAP2A
ENSG00000125378.16	BMP4
ENSG00000125398.8	SOX9
ENSG00000125484.12	GTF3C4
ENSG00000125618.17	PAX8
ENSG00000125648.15	SLC25A23
ENSG00000125651.14	GTF2F1
ENSG00000125686.12	MED1
ENSG00000125691.14	RPL23
ENSG00000125741.5	OPA3
ENSG00000125753.14	VASP
ENSG00000125772.14	GPCPD1
ENSG00000125779.22	PANK2
ENSG00000125826.21	RBCK1
ENSG00000125875.14	TBC1D20
ENSG00000125970.12	RALY
ENSG00000126003.7	PLAGL2
ENSG00000126261.13	UBA2
ENSG00000126524.10	SBDS
ENSG00000126581.13	BECN1
ENSG00000126698.11	DNAJC8
ENSG00000126746.17	ZNF384
ENSG00000126767.18	ELK1
ENSG00000126777.18	KTN1
ENSG00000126821.8	SGPP1
ENSG00000126878.13	AIF1L
ENSG00000127022.15	CANX
ENSG00000127080.10	IPPK
ENSG00000127184.13	COX7C
ENSG00000127314.18	RAP1B
ENSG00000127418.15	FGFRL1
ENSG00000127463.15	EMC1
ENSG00000127526.15	SLC35E1
ENSG00000127527.14	EPS15L1
ENSG00000127530.4	OR7C1
ENSG00000127804.13	METTL16
ENSG00000127838.14	PNKD
ENSG00000127870.17	RNF6
ENSG00000127928.13	GNGT1
ENSG00000127947.16	PTPN12
ENSG00000128050.9	PAICS
ENSG00000128245.15	YWHAH
ENSG00000128342.5	LIF
ENSG00000128463.13	EMC4
ENSG00000128510.12	CPA4
ENSG00000128590.5	DNAJB9
ENSG00000128791.12	TWSG1
ENSG00000128872.10	TMOD2
ENSG00000128923.11	MINDY2
ENSG00000128973.13	CLN6
ENSG00000129116.19	PALLD
ENSG00000129128.13	SPCS3
ENSG00000129197.14	RPAIN
ENSG00000129250.12	KIF1C
ENSG00000129315.11	CCNT1
ENSG00000129317.15	PUS7L
ENSG00000129422.14	MTUS1
ENSG00000129480.13	DTD2
ENSG00000129562.11	DAD1
ENSG00000129625.13	REEP5
ENSG00000129636.13	ITFG1
ENSG00000130024.15	PHF10
ENSG00000130066.16	SAT1
ENSG00000130119.17	GNL3L
ENSG00000130147.16	SH3BP4
ENSG00000130164.14	LDLR
ENSG00000130167.14	TSPAN16
ENSG00000130309.11	COLGALT1
ENSG00000130363.12	RSPH3
ENSG00000130382.9	MLLT1
ENSG00000130402.13	ACTN4
ENSG00000130513.6	GDF15
ENSG00000130741.11	EIF2S3
ENSG00000130935.10	NOL11
ENSG00000130962.18	PRRG1
ENSG00000131043.12	AAR2
ENSG00000131051.24	RBM39
ENSG00000131149.19	GSE1
ENSG00000131165.16	CHMP1A
ENSG00000131171.13	SH3BGRL
ENSG00000131238.18	PPT1
ENSG00000131263.13	RLIM
ENSG00000131323.16	TRAF3
ENSG00000131389.17	SLC6A6
ENSG00000131462.8	TUBG1
ENSG00000131473.17	ACLY
ENSG00000131503.21	ANKHD1
ENSG00000131508.16	UBE2D2
ENSG00000131759.18	RARA
ENSG00000131791.8	PRKAB2
ENSG00000131828.14	PDHA1
ENSG00000132002.9	DNAJB1
ENSG00000132286.12	TIMM10B
ENSG00000132294.15	EFR3A
ENSG00000132341.12	RAN
ENSG00000132356.11	PRKAA1
ENSG00000132383.12	RPA1
ENSG00000132388.12	UBE2G1
ENSG00000132405.19	TBC1D14
ENSG00000132471.12	WBP2
ENSG00000132475.10	H3-3B
ENSG00000132485.14	ZRANB2
ENSG00000132507.18	EIF5A
ENSG00000132603.15	NIP7
ENSG00000132604.11	TERF2
ENSG00000132623.16	ANKEF1
ENSG00000132692.19	BCAN
ENSG00000132763.15	MMACHC
ENSG00000132824.14	SERINC3
ENSG00000132912.13	DCTN4
ENSG00000132915.11	PDE6A
ENSG00000132952.12	USPL1
ENSG00000132964.12	CDK8
ENSG00000133065.11	SLC41A1
ENSG00000133119.13	RFC3
ENSG00000133226.17	SRRM1
ENSG00000133477.17	FAM83F
ENSG00000133606.11	MKRN1
ENSG00000133657.16	ATP13A3
ENSG00000133731.10	IMPA1
ENSG00000133789.15	SWAP70
ENSG00000133812.16	SBF2
ENSG00000133818.14	RRAS2
ENSG00000133895.17	MEN1
ENSG00000133997.12	MED6
ENSG00000134001.15	EIF2S1
ENSG00000134046.12	MBD2
ENSG00000134108.14	ARL8B
ENSG00000134250.20	NOTCH2
ENSG00000134255.14	CEPT1
ENSG00000134287.10	ARF3
ENSG00000134294.14	SLC38A2
ENSG00000134371.14	CDC73
ENSG00000134375.11	TIMM17A
ENSG00000134504.14	KCTD1
ENSG00000134686.18	PHC2
ENSG00000134744.14	TUT4
ENSG00000134748.13	PRPF38A
ENSG00000134758.14	RNF138
ENSG00000134779.15	TPGS2
ENSG00000134825.16	TMEM258
ENSG00000134982.17	APC
ENSG00000135052.16	GOLM1
ENSG00000135119.15	RNFT2
ENSG00000135164.19	DMTF1
ENSG00000135241.17	PNPLA8
ENSG00000135250.17	SRPK2
ENSG00000135318.12	NT5E
ENSG00000135373.13	EHF
ENSG00000135387.21	CAPRIN1
ENSG00000135390.21	ATP5MC2
ENSG00000135424.18	ITGA7
ENSG00000135446.17	CDK4
ENSG00000135454.14	B4GALNT1
ENSG00000135596.18	MICAL1
ENSG00000135632.12	SMYD5
ENSG00000135686.13	KLHL36
ENSG00000135720.13	DYNC1LI2
ENSG00000135747.11	ZNF670-ZNF695
ENSG00000135823.14	STX6
ENSG00000135862.6	LAMC1
ENSG00000135926.15	TMBIM1
ENSG00000135932.11	CAB39
ENSG00000135956.9	TMEM127
ENSG00000135966.13	TGFBRAP1
ENSG00000136003.16	ISCU
ENSG00000136048.14	DRAM1
ENSG00000136068.15	FLNB
ENSG00000136100.14	VPS36
ENSG00000136114.17	THSD1
ENSG00000136146.15	MED4
ENSG00000136231.14	IGF2BP3
ENSG00000136295.15	TTYH3
ENSG00000136305.11	CIDEB
ENSG00000136319.12	TTC5
ENSG00000136436.15	CALCOCO2
ENSG00000136451.9	VEZF1
ENSG00000136504.13	KAT7
ENSG00000136536.15	MARCHF7
ENSG00000136636.13	KCTD3
ENSG00000136709.12	WDR33
ENSG00000136718.10	IMP4
ENSG00000136754.18	ABI1
ENSG00000136758.19	YME1L1
ENSG00000136826.15	KLF4
ENSG00000136868.11	SLC31A1
ENSG00000136875.13	PRPF4
ENSG00000136891.14	TEX10
ENSG00000136897.8	MRPL50
ENSG00000136930.13	PSMB7
ENSG00000136944.19	LMX1B
ENSG00000136986.10	DERL1
ENSG00000136997.21	MYC
ENSG00000137073.23	UBAP2
ENSG00000137074.20	APTX
ENSG00000137075.18	RNF38
ENSG00000137145.20	DENND4C
ENSG00000137221.14	TJAP1
ENSG00000137309.20	HMGA1
ENSG00000137414.6	FAM8A1
ENSG00000137486.17	ARRB1
ENSG00000137509.11	PRCP
ENSG00000137575.12	SDCBP
ENSG00000137710.17	RDX
ENSG00000137818.12	RPLP1
ENSG00000137819.14	PAQR5
ENSG00000137822.13	TUBGCP4
ENSG00000137876.11	RSL24D1
ENSG00000137944.18	KYAT3
ENSG00000137962.13	ARHGAP29
ENSG00000138018.18	SELENOI
ENSG00000138031.14	ADCY3
ENSG00000138069.18	RAB1A
ENSG00000138071.14	ACTR2
ENSG00000138166.6	DUSP5
ENSG00000138279.16	ANXA7
ENSG00000138286.15	FAM149B1
ENSG00000138398.17	PPIG
ENSG00000138434.17	ITPRID2
ENSG00000138439.12	FAM117B
ENSG00000138442.10	WDR12
ENSG00000138443.17	ABI2
ENSG00000138448.12	ITGAV
ENSG00000138593.9	SECISBP2L
ENSG00000138604.10	GLCE
ENSG00000138663.9	COPS4
ENSG00000138709.19	LARP1B
ENSG00000138757.15	G3BP2
ENSG00000138758.12	SEPTIN11
ENSG00000138759.19	FRAS1
ENSG00000138760.10	SCARB2
ENSG00000138771.16	SHROOM3
ENSG00000138777.20	PPA2
ENSG00000138814.17	PPP3CA
ENSG00000139083.11	ETV6
ENSG00000139112.11	GABARAPL1
ENSG00000139116.19	KIF21A
ENSG00000139218.18	SCAF11
ENSG00000139318.8	DUSP6
ENSG00000139433.11	GLTP
ENSG00000139437.18	TCHP
ENSG00000139514.13	SLC7A1
ENSG00000139537.11	CCDC65
ENSG00000139644.13	TMBIM6
ENSG00000139684.15	ESD
ENSG00000139687.16	RB1
ENSG00000139697.14	SBNO1
ENSG00000139793.18	MBNL2
ENSG00000139826.6	ABHD13
ENSG00000140006.11	WDR89
ENSG00000140199.13	SLC12A6
ENSG00000140263.15	SORD
ENSG00000140265.12	ZSCAN29
ENSG00000140297.13	GCNT3
ENSG00000140299.13	BNIP2
ENSG00000140307.11	GTF2A2
ENSG00000140382.15	HMG20A
ENSG00000140391.15	TSPAN3
ENSG00000140395.9	WDR61
ENSG00000140403.12	DNAJA4
ENSG00000140455.17	USP3
ENSG00000140497.16	SCAMP2
ENSG00000140526.18	ABHD2
ENSG00000140577.16	CRTC3
ENSG00000140743.8	CDR2
ENSG00000140941.14	MAP1LC3B
ENSG00000140948.13	ZCCHC14
ENSG00000140988.16	RPS2
ENSG00000140995.17	DEF8
ENSG00000141027.21	NCOR1
ENSG00000141076.18	UTP4
ENSG00000141198.16	TOM1L1
ENSG00000141232.5	TOB1
ENSG00000141367.12	CLTC
ENSG00000141378.15	PTRH2
ENSG00000141380.14	SS18
ENSG00000141424.13	SLC39A6
ENSG00000141425.18	RPRD1A
ENSG00000141429.13	GALNT1
ENSG00000141510.18	TP53
ENSG00000141522.12	ARHGDIA
ENSG00000141526.17	SLC16A3
ENSG00000141543.12	EIF4A3
ENSG00000141551.14	CSNK1D
ENSG00000141569.12	TRIM65
ENSG00000141646.14	SMAD4
ENSG00000141682.12	PMAIP1
ENSG00000141699.11	RETREG3
ENSG00000141905.19	NFIC
ENSG00000141979.4	AC008764.1
ENSG00000142166.13	IFNAR1
ENSG00000142453.12	CARM1
ENSG00000142534.7	RPS11
ENSG00000142541.18	RPL13A
ENSG00000142627.13	EPHA2
ENSG00000142657.21	PGD
ENSG00000142669.15	SH3BGRL3
ENSG00000142676.14	RPL11
ENSG00000142875.19	PRKACB
ENSG00000143033.18	MTF2
ENSG00000143079.15	CTTNBP2NL
ENSG00000143093.15	STRIP1
ENSG00000143155.13	TIPRL
ENSG00000143162.9	CREG1
ENSG00000143179.16	UCK2
ENSG00000143183.18	TMCO1
ENSG00000143222.12	UFC1
ENSG00000143252.16	SDHC
ENSG00000143319.17	ISG20L2
ENSG00000143321.19	HDGF
ENSG00000143322.21	ABL2
ENSG00000143324.14	XPR1
ENSG00000143337.19	TOR1AIP1
ENSG00000143368.10	SF3B4
ENSG00000143390.18	RFX5
ENSG00000143398.20	PIP5K1A
ENSG00000143401.15	ANP32E
ENSG00000143420.19	ENSA
ENSG00000143436.11	MRPL9
ENSG00000143442.22	POGZ
ENSG00000143443.10	C1orf56
ENSG00000143457.11	GOLPH3L
ENSG00000143641.10	GALNT2
ENSG00000143674.11	MAP3K21
ENSG00000143727.16	ACP1
ENSG00000143756.12	FBXO28
ENSG00000143761.16	ARF1
ENSG00000143870.13	PDIA6
ENSG00000144021.3	CIAO1
ENSG00000144036.16	EXOC6B
ENSG00000144043.12	TEX261
ENSG00000144063.4	MALL
ENSG00000144224.17	UBXN4
ENSG00000144228.9	SPOPL
ENSG00000144233.10	AMMECR1L
ENSG00000144283.22	PKP4
ENSG00000144320.14	LNPK
ENSG00000144524.18	COPS7B
ENSG00000144746.7	ARL6IP5
ENSG00000144747.17	TMF1
ENSG00000144820.8	ADGRG7
ENSG00000144848.11	ATG3
ENSG00000145242.13	EPHA5
ENSG00000145284.12	SCD5
ENSG00000145337.5	PYURF
ENSG00000145365.11	TIFA
ENSG00000145439.12	CBR4
ENSG00000145675.15	PIK3R1
ENSG00000145685.14	LHFPL2
ENSG00000145730.20	PAM
ENSG00000145740.19	SLC30A5
ENSG00000145780.8	FEM1C
ENSG00000145817.17	YIPF5
ENSG00000145860.12	RNF145
ENSG00000145907.16	G3BP1
ENSG00000146223.16	RPL7L1
ENSG00000146263.11	MMS22L
ENSG00000146278.11	PNRC1
ENSG00000146433.9	TMEM181
ENSG00000146587.18	RBAK
ENSG00000146676.10	PURB
ENSG00000146731.11	CCT6A
ENSG00000146842.17	TMEM209
ENSG00000146859.6	TMEM140
ENSG00000146950.13	SHROOM2
ENSG00000147065.17	MSN
ENSG00000147164.12	SNX12
ENSG00000147224.13	PRPS1
ENSG00000147274.14	RBMX
ENSG00000147364.17	FBXO25
ENSG00000147403.18	RPL10
ENSG00000147471.12	PLPBP
ENSG00000147526.20	TACC1
ENSG00000147533.17	GOLGA7
ENSG00000147548.17	NSD3
ENSG00000147649.10	MTDH
ENSG00000147676.14	MAL2
ENSG00000147677.11	EIF3H
ENSG00000147679.12	UTP23
ENSG00000147862.17	NFIB
ENSG00000147905.18	ZCCHC7
ENSG00000147955.17	SIGMAR1
ENSG00000148110.16	MFSD14B
ENSG00000148153.14	INIP
ENSG00000148154.10	UGCG
ENSG00000148175.13	STOM
ENSG00000148187.18	MRRF
ENSG00000148248.14	SURF4
ENSG00000148429.14	USP6NL
ENSG00000148672.9	GLUD1
ENSG00000148680.16	HTR7
ENSG00000148730.7	EIF4EBP2
ENSG00000148737.17	TCF7L2
ENSG00000148840.11	PPRC1
ENSG00000149084.13	HSD17B12
ENSG00000149428.19	HYOU1
ENSG00000149639.15	SOGA1
ENSG00000149716.13	LTO1
ENSG00000149792.9	MRPL49
ENSG00000149948.14	HMGA2
ENSG00000150054.18	MPP7
ENSG00000150093.20	ITGB1
ENSG00000150457.9	LATS2
ENSG00000150459.12	SAP18
ENSG00000150753.12	CCT5
ENSG00000150867.14	PIP4K2A
ENSG00000150938.10	CRIM1
ENSG00000150961.15	SEC24D
ENSG00000151012.13	SLC7A11
ENSG00000151239.14	TWF1
ENSG00000151292.17	CSNK1G3
ENSG00000151304.6	SRFBP1
ENSG00000151422.13	FER
ENSG00000151458.12	ANKRD50
ENSG00000151532.14	VTI1A
ENSG00000151553.15	FAM160B1
ENSG00000151611.16	MMAA
ENSG00000151665.13	PIGF
ENSG00000151806.14	GUF1
ENSG00000151835.16	SACS
ENSG00000151846.8	PABPC3
ENSG00000151893.15	CACUL1
ENSG00000151923.17	TIAL1
ENSG00000152061.23	RABGAP1L
ENSG00000152078.10	TLCD4
ENSG00000152104.12	PTPN14
ENSG00000152137.8	HSPB8
ENSG00000152219.5	ARL14EP
ENSG00000152234.16	ATP5F1A
ENSG00000152242.11	C18orf25
ENSG00000152291.14	TGOLN2
ENSG00000152348.16	ATG10
ENSG00000152409.9	JMY
ENSG00000152455.16	SUV39H2
ENSG00000152457.18	DCLRE1C
ENSG00000152484.14	USP12
ENSG00000152520.14	PAN3
ENSG00000152556.17	PFKM
ENSG00000152683.14	SLC30A6
ENSG00000152749.8	GPR180
ENSG00000152944.9	MED21
ENSG00000153037.15	SRP19
ENSG00000153094.24	BCL2L11
ENSG00000153107.13	ANAPC1
ENSG00000153130.17	SCOC
ENSG00000153179.13	RASSF3
ENSG00000153201.16	RANBP2
ENSG00000153310.19	CYRIB
ENSG00000153395.10	LPCAT1
ENSG00000153551.14	CMTM7
ENSG00000153815.16	CMIP
ENSG00000153879.9	CEBPG
ENSG00000153885.14	KCTD15
ENSG00000153922.11	CHD1
ENSG00000154001.14	PPP2R5E
ENSG00000154059.11	IMPACT
ENSG00000154114.12	TBCEL
ENSG00000154122.14	ANKH
ENSG00000154124.5	OTULIN
ENSG00000154144.13	TBRG1
ENSG00000154162.15	CDH12
ENSG00000154174.8	TOMM70
ENSG00000154380.17	ENAH
ENSG00000154429.11	CCSAP
ENSG00000154511.12	DIPK1A
ENSG00000154518.10	ATP5MC3
ENSG00000154529.15	CNTNAP3B
ENSG00000154582.17	ELOC
ENSG00000154710.18	RABGEF1
ENSG00000154920.15	EME1
ENSG00000155008.14	APOOL
ENSG00000155097.12	ATP6V1C1
ENSG00000155189.12	AGPAT5
ENSG00000155304.6	HSPA13
ENSG00000155366.17	RHOC
ENSG00000155438.12	NIFK
ENSG00000155463.14	OXA1L
ENSG00000155506.18	LARP1
ENSG00000155542.12	SETD9
ENSG00000155744.9	FAM126B
ENSG00000155959.12	VBP1
ENSG00000155975.10	VPS37A
ENSG00000156017.13	CARNMT1
ENSG00000156026.14	MCU
ENSG00000156110.15	ADK
ENSG00000156136.10	DCK
ENSG00000156162.16	DPY19L4
ENSG00000156170.13	NDUFAF6
ENSG00000156304.15	SCAF4
ENSG00000156374.16	PCGF6
ENSG00000156467.10	UQCRB
ENSG00000156471.13	PTDSS1
ENSG00000156482.11	RPL30
ENSG00000156508.19	EEF1A1
ENSG00000156687.11	UNC5D
ENSG00000156735.11	BAG4
ENSG00000156860.16	FBRS
ENSG00000156928.5	MALSU1
ENSG00000156976.17	EIF4A2
ENSG00000157036.13	EXOG
ENSG00000157045.9	NTAN1
ENSG00000157106.17	SMG1
ENSG00000157224.16	CLDN12
ENSG00000157450.16	RNF111
ENSG00000157500.12	APPL1
ENSG00000157538.14	VPS26C
ENSG00000157654.19	PALM2AKAP2
ENSG00000157734.14	SNX22
ENSG00000157837.16	SPPL3
ENSG00000157933.10	SKI
ENSG00000157954.15	WIPI2
ENSG00000157985.19	AGAP1
ENSG00000158161.16	EYA3
ENSG00000158195.11	WASF2
ENSG00000158290.18	CUL4B
ENSG00000158435.8	CNOT11
ENSG00000158470.5	B4GALT5
ENSG00000158604.15	TMED4
ENSG00000158636.16	EMSY
ENSG00000158769.18	F11R
ENSG00000158828.8	PINK1
ENSG00000159086.15	PAXBP1
ENSG00000159111.13	MRPL10
ENSG00000159128.15	IFNGR2
ENSG00000159131.17	GART
ENSG00000159140.21	SON
ENSG00000159335.18	PTMS
ENSG00000159433.12	STARD9
ENSG00000159445.13	THEM4
ENSG00000159592.11	GPBP1L1
ENSG00000159840.16	ZYX
ENSG00000159873.10	CCDC117
ENSG00000160014.17	CALM3
ENSG00000160062.15	ZBTB8A
ENSG00000160131.13	VMA21
ENSG00000160208.13	RRP1B
ENSG00000160213.9	CSTB
ENSG00000160679.13	CHTOP
ENSG00000160710.17	ADAR
ENSG00000160803.8	UBQLN4
ENSG00000160888.7	IER2
ENSG00000161010.15	MRNIP
ENSG00000161011.20	SQSTM1
ENSG00000161021.13	MAML1
ENSG00000161203.13	AP2M1
ENSG00000161217.12	PCYT1A
ENSG00000161654.10	LSM12
ENSG00000161888.11	SPC24
ENSG00000161960.16	EIF4A1
ENSG00000162104.10	ADCY9
ENSG00000162129.14	CLPB
ENSG00000162222.14	TTC9C
ENSG00000162298.19	SYVN1
ENSG00000162344.4	FGF19
ENSG00000162377.6	COA7
ENSG00000162378.13	ZYG11B
ENSG00000162413.16	KLHL21
ENSG00000162430.17	SELENON
ENSG00000162433.15	AK4
ENSG00000162434.13	JAK1
ENSG00000162437.14	RAVER2
ENSG00000162441.12	LZIC
ENSG00000162512.16	SDC3
ENSG00000162520.15	SYNC
ENSG00000162521.19	RBBP4
ENSG00000162522.11	KIAA1522
ENSG00000162604.12	TM2D1
ENSG00000162623.16	TYW3
ENSG00000162636.16	FAM102B
ENSG00000162642.14	C1orf52
ENSG00000162694.14	EXTL2
ENSG00000162704.16	ARPC5
ENSG00000162735.19	PEX19
ENSG00000162772.17	ATF3
ENSG00000162777.17	DENND2D
ENSG00000162819.12	BROX
ENSG00000162885.14	B3GALNT2
ENSG00000162923.17	WDR26
ENSG00000162924.15	REL
ENSG00000162959.13	MEMO1
ENSG00000162961.14	DPY30
ENSG00000162980.17	ARL5A
ENSG00000163013.12	FBXO41
ENSG00000163041.13	H3-3A
ENSG00000163053.11	SLC16A14
ENSG00000163104.18	SMARCAD1
ENSG00000163162.9	RNF149
ENSG00000163171.8	CDC42EP3
ENSG00000163281.12	GNPDA2
ENSG00000163293.12	NIPAL1
ENSG00000163319.11	MRPS18C
ENSG00000163322.14	ABRAXAS1
ENSG00000163399.16	ATP1A1
ENSG00000163466.16	ARPC2
ENSG00000163468.15	CCT3
ENSG00000163513.19	TGFBR2
ENSG00000163527.10	STT3B
ENSG00000163607.17	GTPBP8
ENSG00000163608.15	NEPRO
ENSG00000163655.16	GMPS
ENSG00000163684.12	RPP14
ENSG00000163738.18	MTHFD2L
ENSG00000163806.16	SPDYA
ENSG00000163807.6	KIAA1143
ENSG00000163814.8	CDCP1
ENSG00000163904.13	SENP2
ENSG00000163959.10	SLC51A
ENSG00000164024.12	METAP1
ENSG00000164032.12	H2AZ1
ENSG00000164038.16	SLC9B2
ENSG00000164040.18	PGRMC2
ENSG00000164054.15	SHISA5
ENSG00000164070.12	HSPA4L
ENSG00000164091.12	WDR82
ENSG00000164109.14	MAD2L1
ENSG00000164134.13	NAA15
ENSG00000164151.12	ICE1
ENSG00000164162.14	ANAPC10
ENSG00000164163.11	ABCE1
ENSG00000164164.17	OTUD4
ENSG00000164181.14	ELOVL7
ENSG00000164190.19	NIPBL
ENSG00000164253.14	WDR41
ENSG00000164284.15	GRPEL2
ENSG00000164300.17	SERINC5
ENSG00000164331.10	ANKRA2
ENSG00000164414.18	SLC35A1
ENSG00000164442.10	CITED2
ENSG00000164543.7	STK17A
ENSG00000164574.16	GALNT10
ENSG00000164609.10	SLU7
ENSG00000164615.6	CAMLG
ENSG00000164649.20	CDCA7L
ENSG00000164754.15	RAD21
ENSG00000164924.18	YWHAZ
ENSG00000164938.14	TP53INP1
ENSG00000164944.12	VIRMA
ENSG00000165119.21	HNRNPK
ENSG00000165152.9	PGAP4
ENSG00000165175.16	MID1IP1
ENSG00000165410.15	CFL2
ENSG00000165416.15	SUGT1
ENSG00000165476.14	REEP3
ENSG00000165572.8	KBTBD6
ENSG00000165637.13	VDAC2
ENSG00000165660.8	ABRAXAS2
ENSG00000165661.17	QSOX2
ENSG00000165671.21	NSD1
ENSG00000165678.21	GHITM
ENSG00000165757.9	JCAD
ENSG00000165819.12	METTL3
ENSG00000165832.6	TRUB1
ENSG00000165891.16	E2F7
ENSG00000165934.13	CPSF2
ENSG00000165959.12	CLMN
ENSG00000166025.18	AMOTL1
ENSG00000166037.11	CEP57
ENSG00000166128.13	RAB8B
ENSG00000166130.15	IKBIP
ENSG00000166135.14	HIF1AN
ENSG00000166170.10	BAG5
ENSG00000166200.15	COPS2
ENSG00000166225.9	FRS2
ENSG00000166226.13	CCT2
ENSG00000166228.9	PCBD1
ENSG00000166233.15	ARIH1
ENSG00000166260.13	COX11
ENSG00000166272.18	WBP1L
ENSG00000166295.9	ANAPC16
ENSG00000166401.15	SERPINB8
ENSG00000166411.14	IDH3A
ENSG00000166454.10	ATMIN
ENSG00000166479.10	TMX3
ENSG00000166716.10	ZNF592
ENSG00000166794.5	PPIB
ENSG00000166822.13	TMEM170A
ENSG00000166847.10	DCTN5
ENSG00000166860.3	ZBTB39
ENSG00000166908.18	PIP4K2C
ENSG00000166912.17	MTMR10
ENSG00000166913.13	YWHAB
ENSG00000166949.16	SMAD3
ENSG00000166974.13	MAPRE2
ENSG00000167191.12	GPRC5B
ENSG00000167193.8	CRK
ENSG00000167258.15	CDK12
ENSG00000167355.8	OR51B5
ENSG00000167491.17	GATAD2A
ENSG00000167548.16	KMT2D
ENSG00000167552.14	TUBA1A
ENSG00000167553.16	TUBA1C
ENSG00000167562.13	ZNF701
ENSG00000167600.14	CYP2S1
ENSG00000167646.14	DNAAF3
ENSG00000167658.16	EEF2
ENSG00000167695.15	TLCD3A
ENSG00000167720.13	SRR
ENSG00000167721.11	TSR1
ENSG00000167740.10	CYB5D2
ENSG00000167785.9	ZNF558
ENSG00000167978.17	SRRM2
ENSG00000167995.17	BEST1
ENSG00000167996.16	FTH1
ENSG00000168028.14	RPSA
ENSG00000168092.14	PAFAH1B2
ENSG00000168118.12	RAB4A
ENSG00000168137.18	SETD5
ENSG00000168143.9	FAM83B
ENSG00000168159.14	RNF187
ENSG00000168175.15	MAPK1IP1L
ENSG00000168214.20	RBPJ
ENSG00000168280.18	KIF5C
ENSG00000168282.6	MGAT2
ENSG00000168283.14	BMI1
ENSG00000168461.13	RAB31
ENSG00000168566.13	SNRNP48
ENSG00000168785.8	TSPAN5
ENSG00000168795.5	ZBTB5
ENSG00000168807.16	SNTB2
ENSG00000168813.17	ZNF507
ENSG00000168924.15	LETM1
ENSG00000168958.20	MFF
ENSG00000169032.10	MAP2K1
ENSG00000169047.5	IRS1
ENSG00000169057.24	MECP2
ENSG00000169100.14	SLC25A6
ENSG00000169100.14_PAR_Y	SLC25A6
ENSG00000169139.12	UBE2V2
ENSG00000169213.7	RAB3B
ENSG00000169239.13	CA5B
ENSG00000169375.16	SIN3A
ENSG00000169567.13	HINT1
ENSG00000169604.20	ANTXR1
ENSG00000169609.14	C15orf40
ENSG00000169710.9	FASN
ENSG00000169714.17	CNBP
ENSG00000169851.15	PCDH7
ENSG00000169905.13	TOR1AIP2
ENSG00000169925.17	BRD3
ENSG00000169926.11	KLF13
ENSG00000170017.12	ALCAM
ENSG00000170027.7	YWHAG
ENSG00000170035.16	UBE2E3
ENSG00000170088.14	TMEM192
ENSG00000170113.16	NIPA1
ENSG00000170142.12	UBE2E1
ENSG00000170144.21	HNRNPA3
ENSG00000170185.10	USP38
ENSG00000170191.5	NANP
ENSG00000170266.16	GLB1
ENSG00000170365.10	SMAD1
ENSG00000170385.10	SLC30A1
ENSG00000170417.16	TMEM182
ENSG00000170471.15	RALGAPB
ENSG00000170515.14	PA2G4
ENSG00000170522.10	ELOVL6
ENSG00000170540.15	ARL6IP1
ENSG00000170542.6	SERPINB9
ENSG00000170584.11	NUDCD2
ENSG00000170606.15	HSPA4
ENSG00000170632.14	ARMC10
ENSG00000170734.12	POLH
ENSG00000170832.13	USP32
ENSG00000170852.11	KBTBD2
ENSG00000170860.4	LSM3
ENSG00000170871.12	KIAA0232
ENSG00000170949.17	ZNF160
ENSG00000171004.18	HS6ST2
ENSG00000171105.14	INSR
ENSG00000171206.15	TRIM8
ENSG00000171262.11	FAM98B
ENSG00000171302.17	CANT1
ENSG00000171314.9	PGAM1
ENSG00000171453.20	POLR1C
ENSG00000171466.10	ZNF562
ENSG00000171469.11	ZNF561
ENSG00000171492.14	LRRC8D
ENSG00000171530.15	TBCA
ENSG00000171617.14	ENC1
ENSG00000171634.18	BPTF
ENSG00000171681.12	ATF7IP
ENSG00000171823.7	FBXL14
ENSG00000171862.11	PTEN
ENSG00000171865.10	RNASEH1
ENSG00000171867.17	PRNP
ENSG00000172081.14	MOB3A
ENSG00000172239.14	PAIP1
ENSG00000172269.19	DPAGT1
ENSG00000172270.21	BSG
ENSG00000172380.6	GNG12
ENSG00000172432.19	GTPBP2
ENSG00000172466.16	ZNF24
ENSG00000172469.16	MANEA
ENSG00000172493.22	AFF1
ENSG00000172534.14	HCFC1
ENSG00000172667.11	ZMAT3
ENSG00000172728.16	FUT10
ENSG00000172795.17	DCP2
ENSG00000172831.14	CES2
ENSG00000172869.14	DMXL1
ENSG00000172888.12	ZNF621
ENSG00000172936.16	MYD88
ENSG00000173039.19	RELA
ENSG00000173065.13	FAM222B
ENSG00000173166.18	RAPH1
ENSG00000173214.7	MFSD4B
ENSG00000173218.15	VANGL1
ENSG00000173230.15	GOLGB1
ENSG00000173258.13	ZNF483
ENSG00000173273.16	TNKS
ENSG00000173276.14	ZBTB21
ENSG00000173402.12	DAG1
ENSG00000173473.11	SMARCC1
ENSG00000173542.9	MOB1B
ENSG00000173715.18	C11orf80
ENSG00000173744.18	AGFG1
ENSG00000173801.17	JUP
ENSG00000173812.11	EIF1
ENSG00000173852.15	DPY19L1
ENSG00000173875.14	ZNF791
ENSG00000173914.12	RBM4B
ENSG00000173915.16	ATP5MD
ENSG00000173933.21	RBM4
ENSG00000173960.14	UBXN2A
ENSG00000174010.9	KLHL15
ENSG00000174013.8	FBXO45
ENSG00000174021.11	GNG5
ENSG00000174197.16	MGA
ENSG00000174231.17	PRPF8
ENSG00000174238.15	PITPNA
ENSG00000174282.12	ZBTB4
ENSG00000174373.16	RALGAPA1
ENSG00000174444.15	RPL4
ENSG00000174446.13	SNAPC5
ENSG00000174527.10	MYO1H
ENSG00000174574.16	AKIRIN1
ENSG00000174579.4	MSL2
ENSG00000174695.10	TMEM167A
ENSG00000174718.12	RESF1
ENSG00000174796.12	THAP6
ENSG00000174840.9	PDE12
ENSG00000174903.16	RAB1B
ENSG00000174945.13	AMZ1
ENSG00000175130.7	MARCKSL1
ENSG00000175215.11	CTDSP2
ENSG00000175324.10	LSM1
ENSG00000175348.11	TMEM9B
ENSG00000175390.15	EIF3F
ENSG00000175592.9	FOSL1
ENSG00000175768.13	TOMM5
ENSG00000175826.12	CTDNEP1
ENSG00000175893.12	ZDHHC21
ENSG00000175970.11	UNC119B
ENSG00000176018.13	LYSMD3
ENSG00000176087.15	SLC35A4
ENSG00000176148.16	TCP11L1
ENSG00000176340.4	COX8A
ENSG00000176386.9	CDC26
ENSG00000176542.10	USF3
ENSG00000176563.10	CNTD1
ENSG00000176597.12	B3GNT5
ENSG00000176619.13	LMNB2
ENSG00000176697.20	BDNF
ENSG00000176783.15	RUFY1
ENSG00000176871.9	WSB2
ENSG00000176903.5	PNMA1
ENSG00000177034.17	MTX3
ENSG00000177105.10	RHOG
ENSG00000177119.16	ANO6
ENSG00000177125.5	ZBTB34
ENSG00000177311.11	ZBTB38
ENSG00000177425.11	PAWR
ENSG00000177485.7	ZBTB33
ENSG00000177565.18	TBL1XR1
ENSG00000177683.14	THAP5
ENSG00000177853.14	ZNF518A
ENSG00000177879.17	AP3S1
ENSG00000177932.7	ZNF354C
ENSG00000178035.13	IMPDH2
ENSG00000178075.20	GRAMD1C
ENSG00000178163.8	ZNF518B
ENSG00000178209.16	PLEC
ENSG00000178607.16	ERN1
ENSG00000178685.14	PARP10
ENSG00000178694.10	NSUN3
ENSG00000178719.17	GRINA
ENSG00000178996.14	SNX18
ENSG00000179008.9	C14orf39
ENSG00000179010.14	MRFAP1
ENSG00000179119.15	SPTY2D1
ENSG00000179134.15	SAMD4B
ENSG00000179241.13	LDLRAD3
ENSG00000179295.18	PTPN11
ENSG00000179387.10	ELMOD2
ENSG00000179833.4	SERTAD2
ENSG00000179933.6	C14orf119
ENSG00000179941.9	BBS10
ENSG00000179988.15	PSTK
ENSG00000180008.9	SOCS4
ENSG00000180198.16	RCC1
ENSG00000180357.9	ZNF609
ENSG00000180398.13	MCFD2
ENSG00000180530.11	NRIP1
ENSG00000180574.3	EIF2S3B
ENSG00000180694.14	TMEM64
ENSG00000180815.14	MAP3K15
ENSG00000180817.12	PPA1
ENSG00000180957.18	PITPNB
ENSG00000180979.10	LRRC57
ENSG00000181019.13	NQO1
ENSG00000181026.15	AEN
ENSG00000181027.11	FKRP
ENSG00000181163.14	NPM1
ENSG00000181315.11	ZNF322
ENSG00000181350.12	LRRC75A
ENSG00000181381.14	DDX60L
ENSG00000181450.18	ZNF678
ENSG00000181467.5	RAP2B
ENSG00000181610.13	MRPS23
ENSG00000181649.8	PHLDA2
ENSG00000181744.9	DIPK2A
ENSG00000181827.15	RFX7
ENSG00000182087.14	TMEM259
ENSG00000182117.6	NOP10
ENSG00000182149.21	IST1
ENSG00000182158.15	CREB3L2
ENSG00000182185.18	RAD51B
ENSG00000182224.12	CYB5D1
ENSG00000182446.14	NPLOC4
ENSG00000182472.9	CAPN12
ENSG00000182481.10	KPNA2
ENSG00000182512.5	GLRX5
ENSG00000182534.13	MXRA7
ENSG00000182606.17	TRAK1
ENSG00000182768.9	NGRN
ENSG00000182774.13	RPS17
ENSG00000182831.12	C16orf72
ENSG00000182952.5	HMGN4
ENSG00000183010.17	PYCR1
ENSG00000183011.13	NAA38
ENSG00000183134.5	PTGDR2
ENSG00000183230.17	CTNNA3
ENSG00000183251.4	OR51B4
ENSG00000183255.12	PTTG1IP
ENSG00000183283.16	DAZAP2
ENSG00000183291.17	SELENOF
ENSG00000183309.12	ZNF623
ENSG00000183530.14	PRR14L
ENSG00000183723.13	CMTM4
ENSG00000183726.11	TMEM50A
ENSG00000183853.18	KIRREL1
ENSG00000183943.6	PRKX
ENSG00000184009.12	ACTG1
ENSG00000184232.9	OAF
ENSG00000184254.17	ALDH1A3
ENSG00000184402.15	SS18L1
ENSG00000184588.18	PDE4B
ENSG00000184731.6	FAM110C
ENSG00000184752.13	NDUFA12
ENSG00000184860.10	SDR42E1
ENSG00000184863.11	RBM33
ENSG00000185009.13	AP3M1
ENSG00000185055.11	EFCAB10
ENSG00000185090.14	MANEAL
ENSG00000185127.6	C6orf120
ENSG00000185129.8	PURA
ENSG00000185201.16	IFITM2
ENSG00000185246.18	PRPF39
ENSG00000185591.10	SP1
ENSG00000185619.18	PCGF3
ENSG00000185624.15	P4HB
ENSG00000185650.10	ZFP36L1
ENSG00000185722.18	ANKFY1
ENSG00000185753.13	CXorf38
ENSG00000185883.12	ATP6V0C
ENSG00000185896.11	LAMP1
ENSG00000185900.11	POMK
ENSG00000185963.14	BICD2
ENSG00000186106.11	ANKRD46
ENSG00000186130.5	ZBTB6
ENSG00000186174.12	BCL9L
ENSG00000186318.16	BACE1
ENSG00000186432.10	KPNA4
ENSG00000186468.13	RPS23
ENSG00000186470.14	BTN3A2
ENSG00000186567.13	CEACAM19
ENSG00000186812.13	ZNF397
ENSG00000186867.11	QRFPR
ENSG00000186908.14	ZDHHC17
ENSG00000187079.20	TEAD1
ENSG00000187109.15	NAP1L1
ENSG00000187164.20	SHTN1
ENSG00000187257.16	RSBN1L
ENSG00000187522.16	HSPA14
ENSG00000187607.16	ZNF286A
ENSG00000187678.10	SPRY4
ENSG00000187699.10	C2orf88
ENSG00000187720.14	THSD4
ENSG00000188033.10	ZNF490
ENSG00000188167.9	TMPPE
ENSG00000188312.14	CENPP
ENSG00000188316.15	ENO4
ENSG00000188321.13	ZNF559
ENSG00000188428.20	BLOC1S5
ENSG00000188529.15	SRSF10
ENSG00000188643.11	S100A16
ENSG00000188647.13	PTAR1
ENSG00000188706.13	ZDHHC9
ENSG00000188786.10	MTF1
ENSG00000188910.8	GJB3
ENSG00000188994.13	ZNF292
ENSG00000189091.13	SF3B3
ENSG00000189241.8	TSPYL1
ENSG00000189266.13	PNRC2
ENSG00000189298.14	ZKSCAN3
ENSG00000189403.15	HMGB1
ENSG00000196235.14	SUPT5H
ENSG00000196236.13	XPNPEP3
ENSG00000196290.16	NIF3L1
ENSG00000196352.16	CD55
ENSG00000196367.14	TRRAP
ENSG00000196428.12	TSC22D2
ENSG00000196505.11	GDAP2
ENSG00000196531.14	NACA
ENSG00000196565.15	HBG2
ENSG00000196586.16	MYO6
ENSG00000196704.13	AMZ2
ENSG00000196776.17	CD47
ENSG00000196865.4	NHLRC2
ENSG00000196937.11	FAM3C
ENSG00000196943.14	NOP9
ENSG00000196968.11	FUT11
ENSG00000197006.14	METTL9
ENSG00000197045.13	GMFB
ENSG00000197312.12	DDI2
ENSG00000197323.12	TRIM33
ENSG00000197324.9	LRP10
ENSG00000197343.11	ZNF655
ENSG00000197622.13	CDC42SE1
ENSG00000197714.9	ZNF460
ENSG00000197756.10	RPL37A
ENSG00000197771.13	MCMBP
ENSG00000197860.10	SGTB
ENSG00000197894.11	ADH5
ENSG00000197930.13	ERO1A
ENSG00000197965.12	MPZL1
ENSG00000197969.14	VPS13A
ENSG00000197971.16	MBP
ENSG00000198015.14	MRPL42
ENSG00000198034.11	RPS4X
ENSG00000198160.15	MIER1
ENSG00000198162.12	MAN1A2
ENSG00000198225.5	FKBP1C
ENSG00000198242.14	RPL23A
ENSG00000198301.12	SDAD1
ENSG00000198315.11	ZKSCAN8
ENSG00000198408.14	OGA
ENSG00000198431.16	TXNRD1
ENSG00000198464.14	ZNF480
ENSG00000198466.12	ZNF587
ENSG00000198482.14	ZNF808
ENSG00000198538.11	ZNF28
ENSG00000198561.15	CTNND1
ENSG00000198612.11	COPS8
ENSG00000198625.13	MDM4
ENSG00000198646.14	NCOA6
ENSG00000198648.11	STK39
ENSG00000198663.17	C6orf89
ENSG00000198755.11	RPL10A
ENSG00000198792.13	TMEM184B
ENSG00000198799.12	LRIG2
ENSG00000198805.12	PNP
ENSG00000198815.9	FOXJ3
ENSG00000198824.7	CHAMP1
ENSG00000198833.7	UBE2J1
ENSG00000198840.2	MT-ND3
ENSG00000198843.13	SELENOT
ENSG00000198876.13	DCAF12
ENSG00000198898.14	CAPZA2
ENSG00000198900.6	TOP1
ENSG00000198938.2	MT-CO3
ENSG00000203326.12	ZNF525
ENSG00000203499.12	IQANK1
ENSG00000203546.7	AL139353.1
ENSG00000203727.4	SAMD5
ENSG00000203791.15	EEF1AKMT2
ENSG00000204120.16	GIGYF2
ENSG00000204370.13	SDHD
ENSG00000204514.10	ZNF814
ENSG00000204604.12	ZNF468
ENSG00000204628.12	RACK1
ENSG00000204842.18	ATXN2
ENSG00000204977.10	TRIM13
ENSG00000205060.11	SLC35B4
ENSG00000205133.12	TRIQK
ENSG00000205277.9	MUC12
ENSG00000205302.7	SNX2
ENSG00000205339.10	IPO7
ENSG00000205476.9	CCDC85C
ENSG00000205531.13	NAP1L4
ENSG00000205581.11	HMGN1
ENSG00000205639.12	MFSD2B
ENSG00000206053.13	JPT2
ENSG00000206075.14	SERPINB5
ENSG00000206527.10	HACD2
ENSG00000206562.12	METTL6
ENSG00000211455.8	STK38L
ENSG00000213064.10	SFT2D2
ENSG00000213246.7	SUPT4H1
ENSG00000213341.11	CHUK
ENSG00000213516.10	RBMXL1
ENSG00000213551.7	DNAJC9
ENSG00000213593.10	TMX2
ENSG00000213639.10	PPP1CB
ENSG00000213906.10	LTB4R2
ENSG00000213923.13	CSNK1E
ENSG00000213931.7	HBE1
ENSG00000213949.10	ITGA1
ENSG00000214078.13	CPNE1
ENSG00000214114.9	MYCBP
ENSG00000214736.8	TOMM6
ENSG00000214941.8	ZSWIM7
ENSG00000215114.10	UBXN2B
ENSG00000215301.11	DDX3X
ENSG00000215817.7	ZC3H11B
ENSG00000218739.10	CEBPZOS
ENSG00000219481.10	NBPF1
ENSG00000221914.11	PPP2R2A
ENSG00000226479.4	TMEM185B
ENSG00000226887.8	ERVMER34-1
ENSG00000227500.10	SCAMP4
ENSG00000229544.9	NKX1-2
ENSG00000235106.10	BRD3OS
ENSG00000239388.9	ASB14
ENSG00000239920.2	AC104389.5
ENSG00000240445.6	FOXO3B
ENSG00000240849.11	PEDS1
ENSG00000240891.8	PLCXD2
ENSG00000241468.8	ATP5MF
ENSG00000244115.1	DNAJC25-GNG10
ENSG00000244405.8	ETV5
ENSG00000244462.8	RBM12
ENSG00000244509.4	APOBEC3C
ENSG00000245680.11	ZNF585B
ENSG00000247595.4	SPTY2D1OS
ENSG00000248919.7	ATP5MF-PTCD1
ENSG00000253309.6	SERPINE3
ENSG00000253352.10	TUG1
ENSG00000253710.4	ALG11
ENSG00000254772.10	EEF1G
ENSG00000255054.3	AL020996.2
ENSG00000255072.2	PIGY
ENSG00000255104.8	AC005324.3
ENSG00000255154.8	HTD2
ENSG00000255508.7	AP002990.1
ENSG00000255823.5	MTRNR2L8
ENSG00000255872.3	AL138752.2
ENSG00000256100.1	AP000721.1
ENSG00000256646.8	AC010132.3
ENSG00000256966.6	AL513165.2
ENSG00000257065.1	AL049844.1
ENSG00000257390.5	AC023055.1
ENSG00000257411.2	AC034102.2
ENSG00000258539.1	AC068896.1
ENSG00000258790.1	AL121594.1
ENSG00000258864.1	AC008575.1
ENSG00000258881.6	AC007040.2
ENSG00000259784.1	AC093525.1
ENSG00000259900.5	AC026464.1
ENSG00000260007.3	AC107871.1
ENSG00000260272.1	AC093525.2
ENSG00000260342.2	AC138811.2
ENSG00000260371.1	AC026464.3
ENSG00000260836.2	AC245033.1
ENSG00000260914.3	AC026464.4
ENSG00000261582.1	AL121753.1
ENSG00000261717.5	AC009163.5
ENSG00000262302.1	AC003688.1
ENSG00000262633.2	AC005670.2
ENSG00000264058.2	AC073508.2
ENSG00000264364.3	DYNLL2
ENSG00000265241.7	RBM8A
ENSG00000265354.4	TIMM23
ENSG00000265818.1	EEF1E1-BLOC1S5
ENSG00000266412.5	NCOA4
ENSG00000266953.6	AC092073.1
ENSG00000267059.2	AC005943.1
ENSG00000267110.1	AC010327.2
ENSG00000267261.5	AC099811.2
ENSG00000267360.6	AC012309.1
ENSG00000268083.5	AC008982.1
ENSG00000268173.3	AC007192.1
ENSG00000268223.6	ARL14EPL
ENSG00000268750.7	AC010522.1
ENSG00000269343.9	ZNF587B
ENSG00000269693.1	AC010422.6
ENSG00000270011.7	ZNF559-ZNF177
ENSG00000270106.6	TSNAX-DISC1
ENSG00000271092.5	TLCD4-RWDD3
ENSG00000271601.4	LIX1L
ENSG00000272647.3	AC005020.2
ENSG00000272772.1	AC104109.3
ENSG00000272822.2	AC073610.2
ENSG00000272886.6	DCP1A
ENSG00000272897.5	AL109827.1
ENSG00000272968.5	RBAK-RBAKDN
ENSG00000273398.6	AC017083.3
ENSG00000273611.5	ZNHIT3
ENSG00000273734.1	AC005258.1
ENSG00000273841.5	TAF9
ENSG00000274322.1	AL136531.2
ENSG00000274944.4	AL139260.3
ENSG00000275052.5	PPP4R3B
ENSG00000275674.1	AC091167.6
ENSG00000275740.1	AC091959.1
ENSG00000276023.5	DUSP14
ENSG00000276293.4	PIP4K2B
ENSG00000277957.1	SENP3-EIF4A1
ENSG00000278259.4	MYO19
ENSG00000279012.2	OR51B2
ENSG00000280537.2	AC068946.1
ENSG00000280987.4	MATR3
ENSG00000282034.1	AC106886.5
ENSG00000282278.1	AC058822.1
ENSG00000283208.2	AC001226.2
ENSG00000283930.1	AL117339.4
ENSG00000283977.1	AC084337.2
ENSG00000284024.4	AC069544.2
ENSG00000284512.1	AC092718.8
ENSG00000284526.1	AC015802.6
ENSG00000284554.2	AL022318.4
ENSG00000284770.2	TBCE
ENSG00000284969.1	AL049629.2
ENSG00000285238.2	AC006064.6
ENSG00000285292.1	ABCF2-H2BE1
ENSG00000285509.1	TBCEL-TECTA
ENSG00000285635.1	AC021660.3
ENSG00000285713.1	AC098588.2
ENSG00000285839.1	AL445685.3
ENSG00000285854.1	AC010197.2
ENSG00000285897.1	AC004687.2
ENSG00000285901.2	AC008012.1
ENSG00000285920.2	AC087721.2
ENSG00000285932.1	AL133353.2
ENSG00000285942.1	AC018362.3
ENSG00000286905.1	AC108488.2
ENSG00000287908.1	AC025165.6
ENSG00000288000.1	AL031681.2
ENSG00000288534.1	AP001931.2
ENSG00000288671.1	AC006486.3

## Sheet: RNase_T1_025_025
#HCT116, PAR-CLIP, RNase T1, in-lysate 0.25 U/μL, on-bead 0.25 U/μL, this study
ENSEMBL	SYMBOL
ENSG00000002587.10	HS3ST1
ENSG00000002745.13	WNT16
ENSG00000003056.8	M6PR
ENSG00000003249.15	DBNDD1
ENSG00000003436.16	TFPI
ENSG00000004455.17	AK2
ENSG00000004478.8	FKBP4
ENSG00000005022.6	SLC25A5
ENSG00000005187.12	ACSM3
ENSG00000005436.14	GCFC2
ENSG00000005483.21	KMT2E
ENSG00000005893.16	LAMP2
ENSG00000006327.14	TNFRSF12A
ENSG00000006468.14	ETV1
ENSG00000006634.8	DBF4
ENSG00000006695.12	COX10
ENSG00000007168.14	PAFAH1B1
ENSG00000007923.16	DNAJC11
ENSG00000008952.17	SEC62
ENSG00000009335.18	UBE3C
ENSG00000010017.13	RANBP9
ENSG00000010270.14	STARD3NL
ENSG00000011007.12	ELOA
ENSG00000011052.21	NME1-NME2
ENSG00000011304.22	PTBP1
ENSG00000012174.12	MBTPS2
ENSG00000012232.9	EXTL3
ENSG00000013306.16	SLC25A39
ENSG00000013588.9	GPRC5A
ENSG00000015479.20	MATR3
ENSG00000017797.13	RALBP1
ENSG00000018408.15	WWTR1
ENSG00000024422.12	EHD2
ENSG00000025156.13	HSF2
ENSG00000026103.22	FAS
ENSG00000029363.17	BCLAF1
ENSG00000029364.12	SLC39A9
ENSG00000035403.18	VCL
ENSG00000037749.12	MFAP3
ENSG00000038274.17	MAT2B
ENSG00000041988.15	THAP3
ENSG00000043093.15	DCUN1D1
ENSG00000044574.8	HSPA5
ENSG00000046604.13	DSG2
ENSG00000048392.12	RRM2B
ENSG00000048544.6	MRPS10
ENSG00000049130.16	KITLG
ENSG00000049449.10	RCN1
ENSG00000049656.14	CLPTM1L
ENSG00000050130.18	JKAMP
ENSG00000053524.12	MCF2L2
ENSG00000054116.12	TRAPPC3
ENSG00000054118.15	THRAP3
ENSG00000054598.9	FOXC1
ENSG00000055070.17	SZRD1
ENSG00000055208.19	TAB2
ENSG00000055332.18	EIF2AK2
ENSG00000055609.19	KMT2C
ENSG00000055917.16	PUM2
ENSG00000056586.16	RC3H2
ENSG00000057019.16	DCBLD2
ENSG00000058262.10	SEC61A1
ENSG00000058453.17	CROCC
ENSG00000058804.12	NDC1
ENSG00000059728.11	MXD1
ENSG00000062725.10	APPBP2
ENSG00000063177.13	RPL18
ENSG00000063660.9	GPC1
ENSG00000063978.16	RNF4
ENSG00000064225.12	ST3GAL6
ENSG00000064666.15	CNN2
ENSG00000065060.17	UHRF1BP1
ENSG00000065427.15	KARS1
ENSG00000065526.12	SPEN
ENSG00000065665.21	SEC61A2
ENSG00000065911.13	MTHFD2
ENSG00000066032.18	CTNNA2
ENSG00000066583.12	ISOC1
ENSG00000066654.14	THUMPD1
ENSG00000067082.15	KLF6
ENSG00000067113.17	PLPP1
ENSG00000067177.15	PHKA1
ENSG00000067560.13	RHOA
ENSG00000067715.14	SYT1
ENSG00000067955.15	CBFB
ENSG00000069275.13	NUCKS1
ENSG00000069329.18	VPS35
ENSG00000070087.14	PFN2
ENSG00000070756.17	PABPC1
ENSG00000071082.11	RPL31
ENSG00000071564.17	TCF3
ENSG00000071626.17	DAZAP1
ENSG00000071909.19	MYO3B
ENSG00000072042.13	RDH11
ENSG00000072210.19	ALDH3A2
ENSG00000072274.13	TFRC
ENSG00000072501.19	SMC1A
ENSG00000072571.20	HMMR
ENSG00000072803.17	FBXW11
ENSG00000073921.18	PICALM
ENSG00000074695.6	LMAN1
ENSG00000074696.13	HACD3
ENSG00000074800.16	ENO1
ENSG00000075407.18	ZNF37A
ENSG00000075415.13	SLC25A3
ENSG00000075568.17	TMEM131
ENSG00000075618.18	FSCN1
ENSG00000076003.5	MCM6
ENSG00000076554.15	TPD52
ENSG00000077147.16	TM9SF3
ENSG00000077549.19	CAPZB
ENSG00000078140.14	UBE2K
ENSG00000078237.7	TIGAR
ENSG00000078246.17	TULP3
ENSG00000078369.18	GNB1
ENSG00000078399.19	HOXA9
ENSG00000078668.14	VDAC3
ENSG00000078747.16	ITCH
ENSG00000079246.16	XRCC5
ENSG00000080603.17	SRCAP
ENSG00000080819.9	CPOX
ENSG00000080824.19	HSP90AA1
ENSG00000081026.19	MAGI3
ENSG00000081154.12	PCNP
ENSG00000082213.18	C5orf22
ENSG00000082701.17	GSK3B
ENSG00000082996.20	RNF13
ENSG00000083168.11	KAT6A
ENSG00000083520.15	DIS3
ENSG00000083857.14	FAT1
ENSG00000084090.13	STARD7
ENSG00000084112.15	SSH1
ENSG00000084652.16	TXLNA
ENSG00000085231.14	AK6
ENSG00000085274.16	MYNN
ENSG00000085415.16	SEH1L
ENSG00000085719.13	CPNE3
ENSG00000085871.9	MGST2
ENSG00000085872.15	CHERP
ENSG00000086232.13	EIF2AK1
ENSG00000086598.11	TMED2
ENSG00000086666.19	ZFAND6
ENSG00000086758.16	HUWE1
ENSG00000087086.15	FTL
ENSG00000087263.17	OGFOD1
ENSG00000087274.17	ADD1
ENSG00000087302.9	RTRAF
ENSG00000088256.9	GNA11
ENSG00000088448.14	ANKRD10
ENSG00000088832.18	FKBP1A
ENSG00000088888.18	MAVS
ENSG00000089009.15	RPL6
ENSG00000089063.15	TMEM230
ENSG00000089159.16	PXN
ENSG00000089234.16	BRAP
ENSG00000089685.15	BIRC5
ENSG00000089876.12	DHX32
ENSG00000090060.18	PAPOLA
ENSG00000090097.22	PCBP4
ENSG00000090487.11	SPG21
ENSG00000090612.22	ZNF268
ENSG00000090621.15	PABPC4
ENSG00000090863.12	GLG1
ENSG00000091039.17	OSBPL8
ENSG00000091140.14	DLD
ENSG00000091164.13	TXNL1
ENSG00000091317.8	CMTM6
ENSG00000091436.17	MAP3K20
ENSG00000091527.16	CDV3
ENSG00000091542.9	ALKBH5
ENSG00000092148.13	HECTD1
ENSG00000092199.18	HNRNPC
ENSG00000092201.10	SUPT16H
ENSG00000092203.15	TOX4
ENSG00000092531.10	SNAP23
ENSG00000092820.18	EZR
ENSG00000093144.19	ECHDC1
ENSG00000093183.14	SEC22C
ENSG00000095139.14	ARCN1
ENSG00000095261.14	PSMD5
ENSG00000095574.12	IKZF5
ENSG00000095787.23	WAC
ENSG00000096063.16	SRPK1
ENSG00000096696.14	DSP
ENSG00000097021.20	ACOT7
ENSG00000097033.14	SH3GLB1
ENSG00000099194.6	SCD
ENSG00000099817.12	POLR2E
ENSG00000099942.13	CRKL
ENSG00000100028.12	SNRPD3
ENSG00000100030.15	MAPK1
ENSG00000100075.10	SLC25A1
ENSG00000100129.18	EIF3L
ENSG00000100147.14	CCDC134
ENSG00000100216.6	TOMM22
ENSG00000100219.16	XBP1
ENSG00000100281.14	HMGXB4
ENSG00000100354.21	TNRC6B
ENSG00000100393.14	EP300
ENSG00000100410.8	PHF5A
ENSG00000100412.17	ACO2
ENSG00000100473.18	COCH
ENSG00000100478.15	AP4S1
ENSG00000100554.12	ATP6V1D
ENSG00000100558.9	PLEK2
ENSG00000100580.8	TMED8
ENSG00000100614.18	PPM1A
ENSG00000100744.15	GSKIP
ENSG00000100811.14	YY1
ENSG00000100852.13	ARHGAP5
ENSG00000100902.11	PSMA6
ENSG00000101003.10	GINS1
ENSG00000101126.18	ADNP
ENSG00000101138.12	CSTF1
ENSG00000101150.18	TPD52L2
ENSG00000101166.16	PRELID3B
ENSG00000101182.15	PSMA7
ENSG00000101188.5	NTSR1
ENSG00000101191.17	DIDO1
ENSG00000101255.11	TRIB3
ENSG00000101266.19	CSNK2A1
ENSG00000101367.9	MAPRE1
ENSG00000101413.12	RPRD1B
ENSG00000101557.15	USP14
ENSG00000101558.14	VAPA
ENSG00000101608.13	MYL12A
ENSG00000101843.19	PSMD10
ENSG00000101856.10	PGRMC1
ENSG00000101871.16	MID1
ENSG00000101928.13	MOSPD1
ENSG00000101935.10	AMMECR1
ENSG00000101966.13	XIAP
ENSG00000101972.19	STAG2
ENSG00000102007.11	PLP2
ENSG00000102158.20	MAGT1
ENSG00000102225.16	CDK16
ENSG00000102309.15	PIN4
ENSG00000102531.16	FNDC3A
ENSG00000102554.14	KLF5
ENSG00000102804.15	TSC22D1
ENSG00000102908.22	NFAT5
ENSG00000102910.14	LONP2
ENSG00000102931.8	ARL2BP
ENSG00000102934.10	PLLP
ENSG00000102974.16	CTCF
ENSG00000103018.17	CYB5B
ENSG00000103035.11	PSMD7
ENSG00000103044.11	HAS3
ENSG00000103160.12	HSDL1
ENSG00000103194.16	USP10
ENSG00000103275.21	UBE2I
ENSG00000103353.16	UBFD1
ENSG00000103404.14	USP31
ENSG00000103423.14	DNAJA3
ENSG00000103855.18	CD276
ENSG00000104067.17	TJP1
ENSG00000104131.13	EIF3J
ENSG00000104133.15	SPG11
ENSG00000104164.12	BLOC1S6
ENSG00000104231.11	ZFAND1
ENSG00000104341.17	LAPTM4B
ENSG00000104343.21	UBE2W
ENSG00000104375.17	STK3
ENSG00000104472.10	CHRAC1
ENSG00000104635.15	SLC39A14
ENSG00000104660.19	LEPROTL1
ENSG00000104695.13	PPP2CB
ENSG00000104763.20	ASAH1
ENSG00000104824.17	HNRNPL
ENSG00000104979.9	C19orf53
ENSG00000105011.9	ASF1B
ENSG00000105058.12	FAM32A
ENSG00000105072.9	C19orf44
ENSG00000105193.9	RPS16
ENSG00000105220.17	GPI
ENSG00000105341.19	DMAC2
ENSG00000105438.9	KDELR1
ENSG00000105647.19	PIK3R2
ENSG00000105723.13	GSK3A
ENSG00000105778.19	AVL9
ENSG00000105810.10	CDK6
ENSG00000105879.12	CBLL1
ENSG00000105887.11	MTPN
ENSG00000105889.16	STEAP1B
ENSG00000105939.13	ZC3HAV1
ENSG00000105968.19	H2AZ2
ENSG00000105974.13	CAV1
ENSG00000105976.16	MET
ENSG00000105993.15	DNAJB6
ENSG00000106144.20	CASP2
ENSG00000106211.10	HSPB1
ENSG00000106261.17	ZKSCAN1
ENSG00000106299.8	WASL
ENSG00000106546.14	AHR
ENSG00000106554.13	CHCHD3
ENSG00000106608.17	URGCP
ENSG00000106615.10	RHEB
ENSG00000106635.8	BCL7B
ENSG00000106682.15	EIF4H
ENSG00000106723.17	SPIN1
ENSG00000107185.10	RGP1
ENSG00000107341.5	UBE2R2
ENSG00000107372.13	ZFAND5
ENSG00000107566.14	ERLIN1
ENSG00000107581.13	EIF3A
ENSG00000107679.14	PLEKHA1
ENSG00000107779.14	BMPR1A
ENSG00000107816.17	LZTS2
ENSG00000107949.17	BCCIP
ENSG00000108064.11	TFAM
ENSG00000108091.11	CCDC6
ENSG00000108107.15	RPL28
ENSG00000108175.17	ZMIZ1
ENSG00000108179.14	PPIF
ENSG00000108256.9	NUFIP2
ENSG00000108389.9	MTMR4
ENSG00000108424.11	KPNB1
ENSG00000108439.11	PNPO
ENSG00000108443.14	RPS6KB1
ENSG00000108468.15	CBX1
ENSG00000108510.10	MED13
ENSG00000108588.14	CCDC47
ENSG00000108654.16	DDX5
ENSG00000108671.11	PSMD11
ENSG00000108679.13	LGALS3BP
ENSG00000108774.15	RAB5C
ENSG00000108819.11	PPP1R9B
ENSG00000108829.10	LRRC59
ENSG00000108946.15	PRKAR1A
ENSG00000108953.17	YWHAE
ENSG00000109084.14	TMEM97
ENSG00000109133.13	TMEM33
ENSG00000109270.13	LAMTOR3
ENSG00000109321.11	AREG
ENSG00000109332.20	UBE2D3
ENSG00000109390.13	NDUFC1
ENSG00000109519.13	GRPEL1
ENSG00000109572.14	CLCN3
ENSG00000109586.12	GALNT7
ENSG00000109606.13	DHX15
ENSG00000109670.16	FBXW7
ENSG00000109787.13	KLF3
ENSG00000109944.11	JHY
ENSG00000109971.14	HSPA8
ENSG00000110075.15	PPP6R3
ENSG00000110092.4	CCND1
ENSG00000110104.13	CCDC86
ENSG00000110172.12	CHORDC1
ENSG00000110315.7	RNF141
ENSG00000110321.19	EIF4G2
ENSG00000110395.7	CBL
ENSG00000110422.12	HIPK3
ENSG00000110651.12	CD81
ENSG00000110700.7	RPS13
ENSG00000110955.9	ATP5F1B
ENSG00000111011.18	RSRC2
ENSG00000111145.8	ELK3
ENSG00000111224.14	PARP11
ENSG00000111252.11	SH2B3
ENSG00000111371.16	SLC38A1
ENSG00000111404.7	RERGL
ENSG00000111481.10	COPZ1
ENSG00000111530.13	CAND1
ENSG00000111540.16	RAB5B
ENSG00000111640.15	GAPDH
ENSG00000111652.10	COPS7A
ENSG00000111670.16	GNPTAB
ENSG00000111711.10	GOLT1B
ENSG00000111716.14	LDHB
ENSG00000111725.11	PRKAB1
ENSG00000111737.12	RAB35
ENSG00000111752.11	PHC1
ENSG00000111775.3	COX6A1
ENSG00000111780.8	AL021546.1
ENSG00000111786.9	SRSF9
ENSG00000111817.19	DSE
ENSG00000111885.7	MAN1A1
ENSG00000111906.18	HDDC2
ENSG00000111907.21	TPD52L1
ENSG00000112081.17	SRSF3
ENSG00000112110.10	MRPL18
ENSG00000112208.11	BAG2
ENSG00000112531.17	QKI
ENSG00000112697.17	TMEM30A
ENSG00000112996.11	MRPS30
ENSG00000113194.13	FAF2
ENSG00000113300.13	CNOT6
ENSG00000113328.19	CCNG1
ENSG00000113369.9	ARRDC3
ENSG00000113391.19	FAM172A
ENSG00000113552.16	GNPDA1
ENSG00000113558.19	SKP1
ENSG00000113583.8	C5orf15
ENSG00000113658.18	SMAD5
ENSG00000113712.19	CSNK1A1
ENSG00000113732.9	ATP6V0E1
ENSG00000113811.11	SELENOK
ENSG00000114030.13	KPNA1
ENSG00000114062.22	UBE3A
ENSG00000114120.14	SLC25A36
ENSG00000114126.18	TFDP2
ENSG00000114209.15	PDCD10
ENSG00000114302.16	PRKAR2A
ENSG00000114416.18	FXR1
ENSG00000114439.19	BBX
ENSG00000114446.5	IFT57
ENSG00000114686.9	MRPL3
ENSG00000114779.19	ABHD14B
ENSG00000114902.14	SPCS1
ENSG00000114978.18	MOB1A
ENSG00000115053.17	NCL
ENSG00000115207.13	GTF3C2
ENSG00000115233.12	PSMD14
ENSG00000115241.11	PPM1G
ENSG00000115310.18	RTN4
ENSG00000115364.14	MRPL19
ENSG00000115365.12	LANCL1
ENSG00000115464.15	USP34
ENSG00000115520.8	COQ10B
ENSG00000115758.13	ODC1
ENSG00000115760.14	BIRC6
ENSG00000115762.16	PLEKHB2
ENSG00000115806.13	GORASP2
ENSG00000115816.15	CEBPZ
ENSG00000115866.11	DARS1
ENSG00000115946.8	PNO1
ENSG00000115966.17	ATF2
ENSG00000115977.20	AAK1
ENSG00000116005.12	PCYOX1
ENSG00000116044.16	NFE2L2
ENSG00000116127.19	ALMS1
ENSG00000116161.18	CACYBP
ENSG00000116171.19	SCP2
ENSG00000116209.12	TMEM59
ENSG00000116237.16	ICMT
ENSG00000116285.13	ERRFI1
ENSG00000116288.13	PARK7
ENSG00000116459.11	ATP5PB
ENSG00000116489.13	CAPZA1
ENSG00000116698.21	SMG7
ENSG00000116717.13	GADD45A
ENSG00000116745.7	RPE65
ENSG00000116750.14	UCHL5
ENSG00000117000.9	RLF
ENSG00000117133.11	RPF1
ENSG00000117394.24	SLC2A1
ENSG00000117450.15	PRDX1
ENSG00000117597.18	UTP25
ENSG00000117632.23	STMN1
ENSG00000117751.18	PPP1R8
ENSG00000117868.17	ESYT2
ENSG00000117899.11	MESD
ENSG00000118007.13	STAG1
ENSG00000118363.12	SPCS2
ENSG00000118412.13	CASP8AP2
ENSG00000118482.12	PHF3
ENSG00000118496.5	FBXO30
ENSG00000118564.15	FBXL5
ENSG00000118680.14	MYL12B
ENSG00000118689.15	FOXO3
ENSG00000118816.11	CCNI
ENSG00000119280.17	C1orf198
ENSG00000119318.13	RAD23B
ENSG00000119335.17	SET
ENSG00000119396.11	RAB14
ENSG00000119414.12	PPP6C
ENSG00000119596.18	YLPM1
ENSG00000119616.11	FCF1
ENSG00000119929.13	CUTC
ENSG00000119969.15	HELLS
ENSG00000120063.10	GNA13
ENSG00000120071.15	KANSL1
ENSG00000120137.7	PANK3
ENSG00000120690.16	ELF1
ENSG00000120705.13	ETF1
ENSG00000120727.13	PAIP2
ENSG00000120738.8	EGR1
ENSG00000120742.11	SERP1
ENSG00000120802.14	TMPO
ENSG00000120805.14	ARL1
ENSG00000120820.12	GLT8D2
ENSG00000120875.9	DUSP4
ENSG00000120889.13	TNFRSF10B
ENSG00000120948.18	TARDBP
ENSG00000120963.12	ZNF706
ENSG00000121057.13	AKAP1
ENSG00000121644.19	DESI2
ENSG00000121774.18	KHDRBS1
ENSG00000121892.15	PDS5A
ENSG00000122012.14	SV2C
ENSG00000122068.13	FYTTD1
ENSG00000122218.16	COPA
ENSG00000122406.14	RPL5
ENSG00000122482.21	ZNF644
ENSG00000122566.22	HNRNPA2B1
ENSG00000122696.14	SLC25A51
ENSG00000122705.17	CLTA
ENSG00000122783.17	CYREN
ENSG00000122786.20	CALD1
ENSG00000122952.17	ZWINT
ENSG00000123066.9	MED13L
ENSG00000123091.5	RNF11
ENSG00000123124.14	WWP1
ENSG00000123144.11	TRIR
ENSG00000123505.19	AMD1
ENSG00000123728.10	RAP2C
ENSG00000123908.12	AGO2
ENSG00000123975.5	CKS2
ENSG00000123983.14	ACSL3
ENSG00000124145.6	SDC4
ENSG00000124160.12	NCOA5
ENSG00000124171.9	PARD6B
ENSG00000124208.16	PEDS1-UBE2V1
ENSG00000124209.4	RAB22A
ENSG00000124214.20	STAU1
ENSG00000124226.11	RNF114
ENSG00000124380.11	SNRNP27
ENSG00000124593.16	AL365205.1
ENSG00000124733.5	MEA1
ENSG00000124749.17	COL21A1
ENSG00000124762.14	CDKN1A
ENSG00000124767.7	GLO1
ENSG00000124783.14	SSR1
ENSG00000124789.12	NUP153
ENSG00000124882.4	EREG
ENSG00000125124.13	BBS2
ENSG00000125249.7	RAP2A
ENSG00000125484.12	GTF3C4
ENSG00000125534.10	PPDPF
ENSG00000125618.17	PAX8
ENSG00000125648.15	SLC25A23
ENSG00000125651.14	GTF2F1
ENSG00000125686.12	MED1
ENSG00000125691.14	RPL23
ENSG00000125695.12	AC046185.1
ENSG00000125741.5	OPA3
ENSG00000125834.13	STK35
ENSG00000125970.12	RALY
ENSG00000125977.7	EIF2S2
ENSG00000126003.7	PLAGL2
ENSG00000126067.12	PSMB2
ENSG00000126247.11	CAPNS1
ENSG00000126261.13	UBA2
ENSG00000126524.10	SBDS
ENSG00000126581.13	BECN1
ENSG00000126698.11	DNAJC8
ENSG00000126746.17	ZNF384
ENSG00000127022.15	CANX
ENSG00000127184.13	COX7C
ENSG00000127314.18	RAP1B
ENSG00000127527.14	EPS15L1
ENSG00000127530.4	OR7C1
ENSG00000127804.13	METTL16
ENSG00000127955.17	GNAI1
ENSG00000128050.9	PAICS
ENSG00000128245.15	YWHAH
ENSG00000128463.13	EMC4
ENSG00000128595.17	CALU
ENSG00000128607.14	KLHDC10
ENSG00000128789.21	PSMG2
ENSG00000128973.13	CLN6
ENSG00000128989.11	ARPP19
ENSG00000129055.13	ANAPC13
ENSG00000129084.18	PSMA1
ENSG00000129116.19	PALLD
ENSG00000129315.11	CCNT1
ENSG00000129422.14	MTUS1
ENSG00000129472.15	RAB2B
ENSG00000129480.13	DTD2
ENSG00000129515.20	SNX6
ENSG00000129562.11	DAD1
ENSG00000129625.13	REEP5
ENSG00000130119.17	GNL3L
ENSG00000130147.16	SH3BP4
ENSG00000130402.13	ACTN4
ENSG00000130513.6	GDF15
ENSG00000130717.13	UCK1
ENSG00000130723.21	PRRC2B
ENSG00000130726.12	TRIM28
ENSG00000130741.11	EIF2S3
ENSG00000130803.15	ZNF317
ENSG00000130935.10	NOL11
ENSG00000131019.11	ULBP3
ENSG00000131149.19	GSE1
ENSG00000131236.18	CAP1
ENSG00000131238.18	PPT1
ENSG00000131263.13	RLIM
ENSG00000131355.15	ADGRE3
ENSG00000131368.8	MRPS25
ENSG00000131462.8	TUBG1
ENSG00000131473.17	ACLY
ENSG00000131508.16	UBE2D2
ENSG00000131759.18	RARA
ENSG00000131773.14	KHDRBS3
ENSG00000131828.14	PDHA1
ENSG00000131873.7	CHSY1
ENSG00000132002.9	DNAJB1
ENSG00000132256.19	TRIM5
ENSG00000132341.12	RAN
ENSG00000132388.12	UBE2G1
ENSG00000132463.14	GRSF1
ENSG00000132466.19	ANKRD17
ENSG00000132475.10	H3-3B
ENSG00000132603.15	NIP7
ENSG00000132664.12	POLR3F
ENSG00000132692.19	BCAN
ENSG00000132763.15	MMACHC
ENSG00000132824.14	SERINC3
ENSG00000132912.13	DCTN4
ENSG00000132915.11	PDE6A
ENSG00000133065.11	SLC41A1
ENSG00000133112.17	TPT1
ENSG00000133119.13	RFC3
ENSG00000133393.13	CEP20
ENSG00000133703.13	KRAS
ENSG00000133731.10	IMPA1
ENSG00000133884.10	DPF2
ENSG00000134001.15	EIF2S1
ENSG00000134046.12	MBD2
ENSG00000134086.8	VHL
ENSG00000134108.14	ARL8B
ENSG00000134250.20	NOTCH2
ENSG00000134287.10	ARF3
ENSG00000134294.14	SLC38A2
ENSG00000134333.14	LDHA
ENSG00000134375.11	TIMM17A
ENSG00000134440.12	NARS1
ENSG00000134644.16	PUM1
ENSG00000134744.14	TUT4
ENSG00000134748.13	PRPF38A
ENSG00000134758.14	RNF138
ENSG00000134970.14	TMED7
ENSG00000135018.14	UBQLN1
ENSG00000135046.14	ANXA1
ENSG00000135250.17	SRPK2
ENSG00000135318.12	NT5E
ENSG00000135387.21	CAPRIN1
ENSG00000135390.21	ATP5MC2
ENSG00000135678.12	CPM
ENSG00000135679.25	MDM2
ENSG00000135720.13	DYNC1LI2
ENSG00000135932.11	CAB39
ENSG00000136003.16	ISCU
ENSG00000136048.14	DRAM1
ENSG00000136379.12	ABHD17C
ENSG00000136381.13	IREB2
ENSG00000136451.9	VEZF1
ENSG00000136485.15	DCAF7
ENSG00000136504.13	KAT7
ENSG00000136536.15	MARCHF7
ENSG00000136560.14	TANK
ENSG00000136718.10	IMP4
ENSG00000136758.19	YME1L1
ENSG00000136810.13	TXN
ENSG00000136868.11	SLC31A1
ENSG00000136875.13	PRPF4
ENSG00000136897.8	MRPL50
ENSG00000136908.18	DPM2
ENSG00000136938.9	ANP32B
ENSG00000136986.10	DERL1
ENSG00000137073.23	UBAP2
ENSG00000137075.18	RNF38
ENSG00000137154.13	RPS6
ENSG00000137309.20	HMGA1
ENSG00000137414.6	FAM8A1
ENSG00000137575.12	SDCBP
ENSG00000137693.14	YAP1
ENSG00000137807.16	KIF23
ENSG00000137962.13	ARHGAP29
ENSG00000138018.18	SELENOI
ENSG00000138069.18	RAB1A
ENSG00000138071.14	ACTR2
ENSG00000138279.16	ANXA7
ENSG00000138286.15	FAM149B1
ENSG00000138430.16	OLA1
ENSG00000138434.17	ITPRID2
ENSG00000138443.17	ABI2
ENSG00000138592.14	USP8
ENSG00000138594.14	TMOD3
ENSG00000138674.17	SEC31A
ENSG00000138709.19	LARP1B
ENSG00000138758.12	SEPTIN11
ENSG00000138759.19	FRAS1
ENSG00000138760.10	SCARB2
ENSG00000138814.17	PPP3CA
ENSG00000139146.14	SINHCAF
ENSG00000139433.11	GLTP
ENSG00000139437.18	TCHP
ENSG00000139625.13	MAP3K12
ENSG00000139644.13	TMBIM6
ENSG00000139793.18	MBNL2
ENSG00000140022.13	STON2
ENSG00000140157.15	NIPA2
ENSG00000140199.13	SLC12A6
ENSG00000140262.18	TCF12
ENSG00000140297.13	GCNT3
ENSG00000140299.13	BNIP2
ENSG00000140307.11	GTF2A2
ENSG00000140382.15	HMG20A
ENSG00000140450.9	ARRDC4
ENSG00000140455.17	USP3
ENSG00000140526.18	ABHD2
ENSG00000140577.16	CRTC3
ENSG00000140612.14	SEC11A
ENSG00000140718.21	FTO
ENSG00000140743.8	CDR2
ENSG00000140948.13	ZCCHC14
ENSG00000140988.16	RPS2
ENSG00000140995.17	DEF8
ENSG00000141076.18	UTP4
ENSG00000141219.15	C17orf80
ENSG00000141232.5	TOB1
ENSG00000141429.13	GALNT1
ENSG00000141441.16	GAREM1
ENSG00000141522.12	ARHGDIA
ENSG00000141526.17	SLC16A3
ENSG00000141551.14	CSNK1D
ENSG00000141560.15	FN3KRP
ENSG00000141564.15	RPTOR
ENSG00000141576.16	RNF157
ENSG00000141682.12	PMAIP1
ENSG00000141699.11	RETREG3
ENSG00000141858.12	SAMD1
ENSG00000141905.19	NFIC
ENSG00000142192.21	APP
ENSG00000142534.7	RPS11
ENSG00000142541.18	RPL13A
ENSG00000142599.19	RERE
ENSG00000142676.14	RPL11
ENSG00000142864.15	SERBP1
ENSG00000142875.19	PRKACB
ENSG00000142937.12	RPS8
ENSG00000143319.17	ISG20L2
ENSG00000143401.15	ANP32E
ENSG00000143443.10	C1orf56
ENSG00000143457.11	GOLPH3L
ENSG00000143612.21	C1orf43
ENSG00000143727.16	ACP1
ENSG00000143751.10	SDE2
ENSG00000143756.12	FBXO28
ENSG00000143761.16	ARF1
ENSG00000143811.19	PYCR2
ENSG00000143933.19	CALM2
ENSG00000143947.14	RPS27A
ENSG00000143970.17	ASXL2
ENSG00000144043.12	TEX261
ENSG00000144063.4	MALL
ENSG00000144224.17	UBXN4
ENSG00000144228.9	SPOPL
ENSG00000144229.12	THSD7B
ENSG00000144233.10	AMMECR1L
ENSG00000144320.14	LNPK
ENSG00000144366.16	GULP1
ENSG00000144381.18	HSPD1
ENSG00000144468.17	RHBDD1
ENSG00000144524.18	COPS7B
ENSG00000144566.11	RAB5A
ENSG00000144580.14	CNOT9
ENSG00000144746.7	ARL6IP5
ENSG00000144827.9	ABHD10
ENSG00000144840.10	RABL3
ENSG00000145012.13	LPP
ENSG00000145337.5	PYURF
ENSG00000145365.11	TIFA
ENSG00000145391.13	SETD7
ENSG00000145439.12	CBR4
ENSG00000145592.14	RPL37
ENSG00000145782.13	ATG12
ENSG00000145907.16	G3BP1
ENSG00000146066.3	HIGD2A
ENSG00000146072.6	TNFRSF21
ENSG00000146223.16	RPL7L1
ENSG00000146263.11	MMS22L
ENSG00000146676.10	PURB
ENSG00000146859.6	TMEM140
ENSG00000147044.22	CASK
ENSG00000147164.12	SNX12
ENSG00000147224.13	PRPS1
ENSG00000147403.18	RPL10
ENSG00000147471.12	PLPBP
ENSG00000147533.17	GOLGA7
ENSG00000147649.10	MTDH
ENSG00000147676.14	MAL2
ENSG00000147677.11	EIF3H
ENSG00000147679.12	UTP23
ENSG00000147799.11	ARHGAP39
ENSG00000147853.17	AK3
ENSG00000147905.18	ZCCHC7
ENSG00000147955.17	SIGMAR1
ENSG00000148110.16	MFSD14B
ENSG00000148154.10	UGCG
ENSG00000148248.14	SURF4
ENSG00000148429.14	USP6NL
ENSG00000148468.17	FAM171A1
ENSG00000148484.18	RSU1
ENSG00000148737.17	TCF7L2
ENSG00000148773.14	MKI67
ENSG00000149084.13	HSD17B12
ENSG00000149187.18	CELF1
ENSG00000149308.17	NPAT
ENSG00000149313.11	AASDHPPT
ENSG00000149346.15	SLX4IP
ENSG00000149547.15	EI24
ENSG00000149554.13	CHEK1
ENSG00000149557.14	FEZ1
ENSG00000149639.15	SOGA1
ENSG00000149716.13	LTO1
ENSG00000149948.14	HMGA2
ENSG00000149970.16	CNKSR2
ENSG00000150093.20	ITGB1
ENSG00000150459.12	SAP18
ENSG00000150753.12	CCT5
ENSG00000150867.14	PIP4K2A
ENSG00000151239.14	TWF1
ENSG00000151247.12	EIF4E
ENSG00000151292.17	CSNK1G3
ENSG00000151422.13	FER
ENSG00000151553.15	FAM160B1
ENSG00000151665.13	PIGF
ENSG00000151693.11	ASAP2
ENSG00000151806.14	GUF1
ENSG00000151846.8	PABPC3
ENSG00000152056.17	AP1S3
ENSG00000152102.18	FAM168B
ENSG00000152104.12	PTPN14
ENSG00000152137.8	HSPB8
ENSG00000152234.16	ATP5F1A
ENSG00000152242.11	C18orf25
ENSG00000152270.9	PDE3B
ENSG00000152291.14	TGOLN2
ENSG00000152332.16	UHMK1
ENSG00000152348.16	ATG10
ENSG00000152484.14	USP12
ENSG00000152492.15	CCDC50
ENSG00000152518.8	ZFP36L2
ENSG00000152556.17	PFKM
ENSG00000152558.15	TMEM123
ENSG00000152601.17	MBNL1
ENSG00000152700.14	SAR1B
ENSG00000152944.9	MED21
ENSG00000153037.15	SRP19
ENSG00000153130.17	SCOC
ENSG00000153179.13	RASSF3
ENSG00000153201.16	RANBP2
ENSG00000153551.14	CMTM7
ENSG00000153944.12	MSI2
ENSG00000154122.14	ANKH
ENSG00000154162.15	CDH12
ENSG00000154174.8	TOMM70
ENSG00000154217.15	PITPNC1
ENSG00000154380.17	ENAH
ENSG00000154473.18	BUB3
ENSG00000154511.12	DIPK1A
ENSG00000154920.15	EME1
ENSG00000154945.7	ANKRD40
ENSG00000155008.14	APOOL
ENSG00000155097.12	ATP6V1C1
ENSG00000155189.12	AGPAT5
ENSG00000155229.21	MMS19
ENSG00000155380.12	SLC16A1
ENSG00000155438.12	NIFK
ENSG00000155463.14	OXA1L
ENSG00000155506.18	LARP1
ENSG00000155660.11	PDIA4
ENSG00000155903.13	RASA2
ENSG00000155959.12	VBP1
ENSG00000156162.16	DPY19L4
ENSG00000156170.13	NDUFAF6
ENSG00000156273.16	BACH1
ENSG00000156411.10	ATP5MPL
ENSG00000156482.11	RPL30
ENSG00000156504.16	FAM122B
ENSG00000156508.19	EEF1A1
ENSG00000156687.11	UNC5D
ENSG00000156875.14	MFSD14A
ENSG00000156928.5	MALSU1
ENSG00000156976.17	EIF4A2
ENSG00000157106.17	SMG1
ENSG00000157654.19	PALM2AKAP2
ENSG00000157734.14	SNX22
ENSG00000157837.16	SPPL3
ENSG00000157933.10	SKI
ENSG00000157978.12	LDLRAP1
ENSG00000158195.11	WASF2
ENSG00000158470.5	B4GALT5
ENSG00000158604.15	TMED4
ENSG00000158711.14	ELK4
ENSG00000158769.18	F11R
ENSG00000159111.13	MRPL10
ENSG00000159140.21	SON
ENSG00000159202.18	UBE2Z
ENSG00000159335.18	PTMS
ENSG00000159658.14	EFCAB14
ENSG00000160014.17	CALM3
ENSG00000160049.12	DFFA
ENSG00000160075.12	SSU72
ENSG00000160131.13	VMA21
ENSG00000160208.13	RRP1B
ENSG00000160446.19	ZDHHC12
ENSG00000160551.12	TAOK1
ENSG00000160679.13	CHTOP
ENSG00000160691.19	SHC1
ENSG00000160710.17	ADAR
ENSG00000160714.10	UBE2Q1
ENSG00000160803.8	UBQLN4
ENSG00000160888.7	IER2
ENSG00000161010.15	MRNIP
ENSG00000161011.20	SQSTM1
ENSG00000161057.13	PSMC2
ENSG00000161202.20	DVL3
ENSG00000161547.17	SRSF2
ENSG00000161654.10	LSM12
ENSG00000161800.13	RACGAP1
ENSG00000161847.14	RAVER1
ENSG00000161960.16	EIF4A1
ENSG00000162129.14	CLPB
ENSG00000162368.13	CMPK1
ENSG00000162378.13	ZYG11B
ENSG00000162520.15	SYNC
ENSG00000162521.19	RBBP4
ENSG00000162607.13	USP1
ENSG00000162704.16	ARPC5
ENSG00000162772.17	ATF3
ENSG00000162909.18	CAPN2
ENSG00000162923.17	WDR26
ENSG00000162961.14	DPY30
ENSG00000162972.10	MAIP1
ENSG00000162980.17	ARL5A
ENSG00000163041.13	H3-3A
ENSG00000163126.15	ANKRD23
ENSG00000163171.8	CDC42EP3
ENSG00000163281.12	GNPDA2
ENSG00000163320.12	CGGBP1
ENSG00000163348.4	PYGO2
ENSG00000163428.4	LRRC58
ENSG00000163468.15	CCT3
ENSG00000163605.15	PPP4R2
ENSG00000163607.17	GTPBP8
ENSG00000163608.15	NEPRO
ENSG00000163684.12	RPP14
ENSG00000163806.16	SPDYA
ENSG00000163807.6	KIAA1143
ENSG00000163811.12	WDR43
ENSG00000163812.15	ZDHHC3
ENSG00000163814.8	CDCP1
ENSG00000163904.13	SENP2
ENSG00000164031.17	DNAJB14
ENSG00000164032.12	H2AZ1
ENSG00000164040.18	PGRMC2
ENSG00000164091.12	WDR82
ENSG00000164096.13	C4orf3
ENSG00000164134.13	NAA15
ENSG00000164164.17	OTUD4
ENSG00000164244.21	PRRC1
ENSG00000164251.5	F2RL1
ENSG00000164284.15	GRPEL2
ENSG00000164442.10	CITED2
ENSG00000164733.22	CTSB
ENSG00000164754.15	RAD21
ENSG00000164924.18	YWHAZ
ENSG00000164930.12	FZD6
ENSG00000164938.14	TP53INP1
ENSG00000164951.16	PDP1
ENSG00000165119.21	HNRNPK
ENSG00000165169.11	DYNLT3
ENSG00000165410.15	CFL2
ENSG00000165416.15	SUGT1
ENSG00000165417.12	GTF2A1
ENSG00000165527.7	ARF6
ENSG00000165609.13	NUDT5
ENSG00000165637.13	VDAC2
ENSG00000165646.14	SLC18A2
ENSG00000165650.12	PDZD8
ENSG00000165671.21	NSD1
ENSG00000165672.7	PRDX3
ENSG00000165678.21	GHITM
ENSG00000165732.13	DDX21
ENSG00000165757.9	JCAD
ENSG00000165802.23	NSMF
ENSG00000165832.6	TRUB1
ENSG00000165997.5	ARL5B
ENSG00000166170.10	BAG5
ENSG00000166200.15	COPS2
ENSG00000166224.17	SGPL1
ENSG00000166225.9	FRS2
ENSG00000166226.13	CCT2
ENSG00000166228.9	PCBD1
ENSG00000166233.15	ARIH1
ENSG00000166340.17	TPP1
ENSG00000166451.13	CENPN
ENSG00000166454.10	ATMIN
ENSG00000166579.16	NDEL1
ENSG00000166710.21	B2M
ENSG00000166747.13	AP1G1
ENSG00000166780.11	BMERB1
ENSG00000166794.5	PPIB
ENSG00000166889.14	PATL1
ENSG00000166913.13	YWHAB
ENSG00000166974.13	MAPRE2
ENSG00000167182.15	SP2
ENSG00000167193.8	CRK
ENSG00000167355.8	OR51B5
ENSG00000167460.17	TPM4
ENSG00000167461.12	RAB8A
ENSG00000167491.17	GATAD2A
ENSG00000167553.16	TUBA1C
ENSG00000167646.14	DNAAF3
ENSG00000167658.16	EEF2
ENSG00000167695.15	TLCD3A
ENSG00000167978.17	SRRM2
ENSG00000167995.17	BEST1
ENSG00000167996.16	FTH1
ENSG00000168028.14	RPSA
ENSG00000168066.20	SF1
ENSG00000168092.14	PAFAH1B2
ENSG00000168137.18	SETD5
ENSG00000168214.20	RBPJ
ENSG00000168283.14	BMI1
ENSG00000168385.18	SEPTIN2
ENSG00000168566.13	SNRNP48
ENSG00000168763.16	CNNM3
ENSG00000168769.14	TET2
ENSG00000168785.8	TSPAN5
ENSG00000168795.5	ZBTB5
ENSG00000168802.14	CHTF8
ENSG00000168958.20	MFF
ENSG00000169018.6	FEM1B
ENSG00000169045.17	HNRNPH1
ENSG00000169047.5	IRS1
ENSG00000169100.14	SLC25A6
ENSG00000169100.14_PAR_Y	SLC25A6
ENSG00000169139.12	UBE2V2
ENSG00000169230.10	PRELID1
ENSG00000169564.7	PCBP1
ENSG00000169570.10	DTWD2
ENSG00000169710.9	FASN
ENSG00000169714.17	CNBP
ENSG00000169813.16	HNRNPF
ENSG00000169851.15	PCDH7
ENSG00000169905.13	TOR1AIP2
ENSG00000170027.7	YWHAG
ENSG00000170113.16	NIPA1
ENSG00000170144.21	HNRNPA3
ENSG00000170236.16	USP50
ENSG00000170289.12	CNGB3
ENSG00000170296.10	GABARAP
ENSG00000170365.10	SMAD1
ENSG00000170396.9	ZNF804A
ENSG00000170482.17	SLC23A1
ENSG00000170515.14	PA2G4
ENSG00000170615.15	SLC26A5
ENSG00000170627.11	GTSF1
ENSG00000170653.19	ATF7
ENSG00000170759.11	KIF5B
ENSG00000170852.11	KBTBD2
ENSG00000170860.4	LSM3
ENSG00000171204.13	TMEM126B
ENSG00000171206.15	TRIM8
ENSG00000171262.11	FAM98B
ENSG00000171314.9	PGAM1
ENSG00000171444.18	MCC
ENSG00000171475.14	WIPF2
ENSG00000171490.13	RSL1D1
ENSG00000171530.15	TBCA
ENSG00000171603.18	CLSTN1
ENSG00000171848.16	RRM2
ENSG00000171862.11	PTEN
ENSG00000171865.10	RNASEH1
ENSG00000171867.17	PRNP
ENSG00000171954.13	CYP4F22
ENSG00000172081.14	MOB3A
ENSG00000172270.21	BSG
ENSG00000172380.6	GNG12
ENSG00000172432.19	GTPBP2
ENSG00000172466.16	ZNF24
ENSG00000172667.11	ZMAT3
ENSG00000172954.14	LCLAT1
ENSG00000173039.19	RELA
ENSG00000173166.18	RAPH1
ENSG00000173402.12	DAG1
ENSG00000173418.12	NAA20
ENSG00000173456.5	RNF26
ENSG00000173530.6	TNFRSF10D
ENSG00000173542.9	MOB1B
ENSG00000173674.11	EIF1AX
ENSG00000173726.11	TOMM20
ENSG00000173744.18	AGFG1
ENSG00000173812.11	EIF1
ENSG00000173852.15	DPY19L1
ENSG00000173875.14	ZNF791
ENSG00000173889.16	PHC3
ENSG00000173915.16	ATP5MD
ENSG00000174013.8	FBXO45
ENSG00000174021.11	GNG5
ENSG00000174231.17	PRPF8
ENSG00000174574.16	AKIRIN1
ENSG00000174695.10	TMEM167A
ENSG00000174748.22	RPL15
ENSG00000174780.17	SRP72
ENSG00000174840.9	PDE12
ENSG00000174903.16	RAB1B
ENSG00000175073.8	VCPIP1
ENSG00000175215.11	CTDSP2
ENSG00000175334.8	BANF1
ENSG00000175348.11	TMEM9B
ENSG00000175390.15	EIF3F
ENSG00000175414.7	ARL10
ENSG00000175582.20	RAB6A
ENSG00000175592.9	FOSL1
ENSG00000175727.14	MLXIP
ENSG00000175768.13	TOMM5
ENSG00000175792.12	RUVBL1
ENSG00000175826.12	CTDNEP1
ENSG00000175970.11	UNC119B
ENSG00000176340.4	COX8A
ENSG00000176386.9	CDC26
ENSG00000176542.10	USF3
ENSG00000176563.10	CNTD1
ENSG00000176597.12	B3GNT5
ENSG00000176619.13	LMNB2
ENSG00000176697.20	BDNF
ENSG00000177105.10	RHOG
ENSG00000177425.11	PAWR
ENSG00000177463.15	NR2C2
ENSG00000177565.18	TBL1XR1
ENSG00000177733.7	HNRNPA0
ENSG00000177879.17	AP3S1
ENSG00000177963.14	RIC8A
ENSG00000178035.13	IMPDH2
ENSG00000178163.8	ZNF518B
ENSG00000178691.11	SUZ12
ENSG00000178882.15	RFLNA
ENSG00000179010.14	MRFAP1
ENSG00000179195.16	ZNF664
ENSG00000179241.13	LDLRAD3
ENSG00000179295.18	PTPN11
ENSG00000179833.4	SERTAD2
ENSG00000179889.19	PDXDC1
ENSG00000179933.6	C14orf119
ENSG00000179958.10	DCTPP1
ENSG00000179965.12	ZNF771
ENSG00000179988.15	PSTK
ENSG00000180008.9	SOCS4
ENSG00000180357.9	ZNF609
ENSG00000180530.11	NRIP1
ENSG00000180574.3	EIF2S3B
ENSG00000180628.15	PCGF5
ENSG00000180694.14	TMEM64
ENSG00000180815.14	MAP3K15
ENSG00000180817.12	PPA1
ENSG00000180901.11	KCTD2
ENSG00000180917.18	CMTR2
ENSG00000180957.18	PITPNB
ENSG00000181026.15	AEN
ENSG00000181163.14	NPM1
ENSG00000181350.12	LRRC75A
ENSG00000181467.5	RAP2B
ENSG00000181649.8	PHLDA2
ENSG00000181788.4	SIAH2
ENSG00000181827.15	RFX7
ENSG00000181904.9	C5orf24
ENSG00000181915.5	ADO
ENSG00000182022.18	CHST15
ENSG00000182185.18	RAD51B
ENSG00000182224.12	CYB5D1
ENSG00000182307.14	C8orf33
ENSG00000182329.14	KIAA2012
ENSG00000182446.14	NPLOC4
ENSG00000182472.9	CAPN12
ENSG00000182481.10	KPNA2
ENSG00000182512.5	GLRX5
ENSG00000182534.13	MXRA7
ENSG00000182628.13	SKA2
ENSG00000182718.18	ANXA2
ENSG00000182768.9	NGRN
ENSG00000182774.13	RPS17
ENSG00000182827.9	ACBD3
ENSG00000182831.12	C16orf72
ENSG00000182952.5	HMGN4
ENSG00000183011.13	NAA38
ENSG00000183060.15	LYSMD4
ENSG00000183066.14	WBP2NL
ENSG00000183251.4	OR51B4
ENSG00000183255.12	PTTG1IP
ENSG00000183283.16	DAZAP2
ENSG00000183291.17	SELENOF
ENSG00000183520.12	UTP11
ENSG00000183741.12	CBX6
ENSG00000183808.11	RBM12B
ENSG00000183977.14	PP2D1
ENSG00000184007.22	PTP4A2
ENSG00000184009.12	ACTG1
ENSG00000184254.17	ALDH1A3
ENSG00000184588.18	PDE4B
ENSG00000184752.13	NDUFA12
ENSG00000185000.12	DGAT1
ENSG00000185009.13	AP3M1
ENSG00000185055.11	EFCAB10
ENSG00000185122.11	HSF1
ENSG00000185201.16	IFITM2
ENSG00000185236.12	RAB11B
ENSG00000185414.20	MRPL30
ENSG00000185442.13	FAM174B
ENSG00000185591.10	SP1
ENSG00000185624.15	P4HB
ENSG00000185650.10	ZFP36L1
ENSG00000185651.15	UBE2L3
ENSG00000185787.15	MORF4L1
ENSG00000185883.12	ATP6V0C
ENSG00000185896.11	LAMP1
ENSG00000185900.11	POMK
ENSG00000185958.10	FAM186A
ENSG00000186111.10	PIP5K1C
ENSG00000186174.12	BCL9L
ENSG00000186298.12	PPP1CC
ENSG00000186468.13	RPS23
ENSG00000186522.15	SEPTIN10
ENSG00000186566.13	GPATCH8
ENSG00000186591.13	UBE2H
ENSG00000186660.15	ZFP91
ENSG00000187079.20	TEAD1
ENSG00000187144.11	SPATA21
ENSG00000187416.12	LHFPL3
ENSG00000187446.12	CHP1
ENSG00000187514.17	PTMA
ENSG00000187522.16	HSPA14
ENSG00000187678.10	SPRY4
ENSG00000187699.10	C2orf88
ENSG00000187720.14	THSD4
ENSG00000187735.14	TCEA1
ENSG00000188033.10	ZNF490
ENSG00000188163.8	FAM166A
ENSG00000188229.6	TUBB4B
ENSG00000188343.13	CIBAR1
ENSG00000188486.3	H2AX
ENSG00000188529.15	SRSF10
ENSG00000188611.16	ASAH2
ENSG00000188643.11	S100A16
ENSG00000188725.8	SMIM15
ENSG00000189060.5	H1-0
ENSG00000189067.13	LITAF
ENSG00000189108.13	IL1RAPL2
ENSG00000189186.10	DCAF8L2
ENSG00000189241.8	TSPYL1
ENSG00000189266.13	PNRC2
ENSG00000189403.15	HMGB1
ENSG00000196141.14	SPATS2L
ENSG00000196233.14	LCOR
ENSG00000196235.14	SUPT5H
ENSG00000196531.14	NACA
ENSG00000196565.15	HBG2
ENSG00000196704.13	AMZ2
ENSG00000196712.18	NF1
ENSG00000196715.7	VKORC1L1
ENSG00000196792.12	STRN3
ENSG00000196850.6	PPTC7
ENSG00000196937.11	FAM3C
ENSG00000196968.11	FUT11
ENSG00000197006.14	METTL9
ENSG00000197045.13	GMFB
ENSG00000197111.16	PCBP2
ENSG00000197343.11	ZNF655
ENSG00000197622.13	CDC42SE1
ENSG00000197714.9	ZNF460
ENSG00000197753.11	LHFPL5
ENSG00000197756.10	RPL37A
ENSG00000197771.13	MCMBP
ENSG00000197885.11	NKIRAS1
ENSG00000197894.11	ADH5
ENSG00000197930.13	ERO1A
ENSG00000197961.12	ZNF121
ENSG00000197965.12	MPZL1
ENSG00000197980.13	LEKR1
ENSG00000198015.14	MRPL42
ENSG00000198018.7	ENTPD7
ENSG00000198034.11	RPS4X
ENSG00000198160.15	MIER1
ENSG00000198225.5	FKBP1C
ENSG00000198242.14	RPL23A
ENSG00000198265.12	HELZ
ENSG00000198301.12	SDAD1
ENSG00000198315.11	ZKSCAN8
ENSG00000198363.18	ASPH
ENSG00000198431.16	TXNRD1
ENSG00000198612.11	COPS8
ENSG00000198646.14	NCOA6
ENSG00000198663.17	C6orf89
ENSG00000198668.13	CALM1
ENSG00000198712.1	MT-CO2
ENSG00000198730.9	CTR9
ENSG00000198755.11	RPL10A
ENSG00000198791.12	CNOT7
ENSG00000198815.9	FOXJ3
ENSG00000198824.7	CHAMP1
ENSG00000198833.7	UBE2J1
ENSG00000198860.13	TSEN15
ENSG00000198901.14	PRC1
ENSG00000198961.10	PJA2
ENSG00000203546.7	AL139353.1
ENSG00000203950.6	RTL8A
ENSG00000204138.13	PHACTR4
ENSG00000204628.12	RACK1
ENSG00000204842.18	ATXN2
ENSG00000205339.10	IPO7
ENSG00000205581.11	HMGN1
ENSG00000205707.11	ETFRF1
ENSG00000205730.6	ITPRIPL2
ENSG00000205937.12	RNPS1
ENSG00000206053.13	JPT2
ENSG00000206075.14	SERPINB5
ENSG00000206199.11	ANKUB1
ENSG00000206527.10	HACD2
ENSG00000213347.10	MXD3
ENSG00000213551.7	DNAJC9
ENSG00000213593.10	TMX2
ENSG00000213639.10	PPP1CB
ENSG00000213931.7	HBE1
ENSG00000213965.3	NUDT19
ENSG00000214046.9	SMIM7
ENSG00000214078.13	CPNE1
ENSG00000214114.9	MYCBP
ENSG00000214160.10	ALG3
ENSG00000214435.8	AS3MT
ENSG00000214736.8	TOMM6
ENSG00000215021.10	PHB2
ENSG00000215114.10	UBXN2B
ENSG00000215183.5	MSMP
ENSG00000215193.13	PEX26
ENSG00000218739.10	CEBPZOS
ENSG00000220205.9	VAMP2
ENSG00000221914.11	PPP2R2A
ENSG00000222014.6	RAB6C
ENSG00000225921.7	NOL7
ENSG00000227500.10	SCAMP4
ENSG00000230989.7	HSBP1
ENSG00000231767.4	RPS27AP5
ENSG00000233087.7	RAB6D
ENSG00000235750.10	KIAA0040
ENSG00000239264.9	TXNDC5
ENSG00000239920.2	AC104389.5
ENSG00000240344.9	PPIL3
ENSG00000240849.11	PEDS1
ENSG00000241962.9	AC079447.1
ENSG00000242485.6	MRPL20
ENSG00000243678.12	NME2
ENSG00000244462.8	RBM12
ENSG00000244509.4	APOBEC3C
ENSG00000244687.12	UBE2V1
ENSG00000250349.3	AF241726.1
ENSG00000251201.8	TMED7-TICAM2
ENSG00000253352.10	TUG1
ENSG00000254772.10	EEF1G
ENSG00000254999.4	BRK1
ENSG00000255072.2	PIGY
ENSG00000255073.8	ZFP91-CNTF
ENSG00000255154.8	HTD2
ENSG00000255508.7	AP002990.1
ENSG00000255529.9	POLR2M
ENSG00000255835.1	AL117348.2
ENSG00000255872.3	AL138752.2
ENSG00000256100.1	AP000721.1
ENSG00000256206.2	AC018523.2
ENSG00000256966.6	AL513165.2
ENSG00000257103.8	LSM14A
ENSG00000257218.6	GATC
ENSG00000258465.8	AL139011.2
ENSG00000258466.5	AL049779.1
ENSG00000258677.2	AC022826.2
ENSG00000258790.1	AL121594.1
ENSG00000258881.6	AC007040.2
ENSG00000259040.5	BLOC1S5-TXNDC5
ENSG00000259784.1	AC093525.1
ENSG00000259900.5	AC026464.1
ENSG00000260170.1	AC090527.2
ENSG00000260272.1	AC093525.2
ENSG00000260371.1	AC026464.3
ENSG00000260836.2	AC245033.1
ENSG00000262302.1	AC003688.1
ENSG00000262526.2	AC120057.2
ENSG00000263001.7	GTF2I
ENSG00000263465.4	SRSF8
ENSG00000263620.1	AC129492.3
ENSG00000264324.1	AC006030.1
ENSG00000265354.4	TIMM23
ENSG00000266472.6	MRPS21
ENSG00000266953.6	AC092073.1
ENSG00000267110.1	AC010327.2
ENSG00000267168.1	AC005837.2
ENSG00000267261.5	AC099811.2
ENSG00000267281.2	ATF7-NPFF
ENSG00000267303.1	AC011511.4
ENSG00000267318.1	AC005702.1
ENSG00000268083.5	AC008982.1
ENSG00000268173.3	AC007192.1
ENSG00000268790.5	AC008764.4
ENSG00000270149.5	AL591806.2
ENSG00000270299.1	AL121758.1
ENSG00000270316.1	BORCS7-ASMT
ENSG00000270757.1	HSPE1-MOB4
ENSG00000270800.3	RPS10-NUDT3
ENSG00000271303.2	SRXN1
ENSG00000272325.2	NUDT3
ENSG00000272391.6	POM121C
ENSG00000272647.3	AC005020.2
ENSG00000272822.2	AC073610.2
ENSG00000272886.6	DCP1A
ENSG00000272897.5	AL109827.1
ENSG00000272968.5	RBAK-RBAKDN
ENSG00000273269.3	AC073283.3
ENSG00000273611.5	ZNHIT3
ENSG00000273749.5	CYFIP1
ENSG00000273841.5	TAF9
ENSG00000274322.1	AL136531.2
ENSG00000274944.4	AL139260.3
ENSG00000275674.1	AC091167.6
ENSG00000276418.5	AC036214.3
ENSG00000277726.4	AL109811.3
ENSG00000277957.1	SENP3-EIF4A1
ENSG00000278129.2	ZNF8
ENSG00000278259.4	MYO19
ENSG00000280987.4	MATR3
ENSG00000282034.1	AC106886.5
ENSG00000282218.1	AL132671.2
ENSG00000283321.1	AC019117.3
ENSG00000283515.1	AC020915.4
ENSG00000283761.1	AC118553.2
ENSG00000283930.1	AL117339.4
ENSG00000284024.4	AC069544.2
ENSG00000284512.1	AC092718.8
ENSG00000284526.1	AC015802.6
ENSG00000284554.2	AL022318.4
ENSG00000285635.1	AC021660.3
ENSG00000285854.1	AC010197.2
ENSG00000285901.2	AC008012.1
ENSG00000285920.2	AC087721.2
ENSG00000285932.1	AL133353.2
ENSG00000285942.1	AC018362.3
ENSG00000286001.1	AC021087.5
ENSG00000286070.2	AP000356.5
ENSG00000286140.1	DERPC
ENSG00000286239.1	AC093884.1
ENSG00000286905.1	AC108488.2
ENSG00000288534.1	AP001931.2
ENSG00000288671.1	AC006486.3

## Sheet: RNase_I_01_0025_IgG
#HCT116, PAR-CLIP, IgG RNase I, in-lysate 0.1 U/μL, on-bead 0.025 U/μL, this study
ENSG00000027001.10	MIPEP
ENSG00000057019.16	DCBLD2
ENSG00000064225.12	ST3GAL6
ENSG00000070756.17	PABPC1
ENSG00000103018.17	CYB5B
ENSG00000107554.17	DNMBP
ENSG00000124749.17	COL21A1
ENSG00000124762.14	CDKN1A
ENSG00000147799.11	ARHGAP39
ENSG00000148082.10	SHC3
ENSG00000197170.10	PSMD12

## Sheet: Hafner et al. 2010
#HEK293, PAR-CLIP, Hafner et al. 2010
ENSEMBL	SYMBOL
ENSG00000000003.15	TSPAN6
ENSG00000001630.17	CYP51A1
ENSG00000003056.8	M6PR
ENSG00000003509.16	NDUFAF7
ENSG00000003989.18	SLC7A2
ENSG00000004142.12	POLDIP2
ENSG00000004455.17	AK2
ENSG00000004478.8	FKBP4
ENSG00000004866.22	ST7
ENSG00000004897.12	CDC27
ENSG00000005020.13	SKAP2
ENSG00000005022.6	SLC25A5
ENSG00000005059.16	MCUB
ENSG00000005156.12	LIG3
ENSG00000005187.12	ACSM3
ENSG00000005249.13	PRKAR2B
ENSG00000005436.14	GCFC2
ENSG00000005483.21	KMT2E
ENSG00000005812.11	FBXL3
ENSG00000005889.16	ZFX
ENSG00000005893.16	LAMP2
ENSG00000006007.12	GDE1
ENSG00000006125.18	AP2B1
ENSG00000006634.8	DBF4
ENSG00000006831.10	ADIPOR2
ENSG00000007001.13	UPP2
ENSG00000007168.14	PAFAH1B1
ENSG00000008282.9	SYPL1
ENSG00000008294.21	SPAG9
ENSG00000008394.13	MGST1
ENSG00000008952.17	SEC62
ENSG00000008988.11	RPS20
ENSG00000009307.16	CSDE1
ENSG00000009335.18	UBE3C
ENSG00000009413.16	REV3L
ENSG00000009844.16	VTA1
ENSG00000009954.11	BAZ1B
ENSG00000010072.16	SPRTN
ENSG00000010244.19	ZNF207
ENSG00000010270.14	STARD3NL
ENSG00000010932.17	FMO1
ENSG00000011007.12	ELOA
ENSG00000011114.15	BTBD7
ENSG00000011295.16	TTC19
ENSG00000011304.22	PTBP1
ENSG00000011405.13	PIK3C2A
ENSG00000011426.11	ANLN
ENSG00000012048.23	BRCA1
ENSG00000012174.12	MBTPS2
ENSG00000012660.14	ELOVL5
ENSG00000012963.15	UBR7
ENSG00000013375.16	PGM3
ENSG00000014824.14	SLC30A9
ENSG00000014919.13	COX15
ENSG00000015475.19	BID
ENSG00000015479.20	MATR3
ENSG00000017797.13	RALBP1
ENSG00000018510.17	AGPS
ENSG00000019991.18	HGF
ENSG00000021574.13	SPAST
ENSG00000022267.19	FHL1
ENSG00000023228.14	NDUFS1
ENSG00000023287.13	RB1CC1
ENSG00000023516.9	AKAP11
ENSG00000023572.10	GLRX2
ENSG00000023734.11	STRAP
ENSG00000023909.10	GCLM
ENSG00000024526.17	DEPDC1
ENSG00000025039.15	RRAGD
ENSG00000025796.14	SEC63
ENSG00000025800.14	KPNA6
ENSG00000026025.16	VIM
ENSG00000028203.18	VEZT
ENSG00000029153.14	ARNTL2
ENSG00000029363.17	BCLAF1
ENSG00000029364.12	SLC39A9
ENSG00000029725.17	RABEP1
ENSG00000031003.10	FAM13B
ENSG00000033800.14	PIAS1
ENSG00000035403.18	VCL
ENSG00000035687.10	ADSS2
ENSG00000036054.13	TBC1D23
ENSG00000037749.12	MFAP3
ENSG00000038427.16	VCAN
ENSG00000039560.14	RAI14
ENSG00000039650.12	PNKP
ENSG00000041357.16	PSMA4
ENSG00000043093.15	DCUN1D1
ENSG00000043355.12	ZIC2
ENSG00000044115.21	CTNNA1
ENSG00000046604.13	DSG2
ENSG00000046653.15	GPM6B
ENSG00000047621.12	C12orf4
ENSG00000047634.15	SCML1
ENSG00000047648.23	ARHGAP6
ENSG00000047932.14	GOPC
ENSG00000048392.12	RRM2B
ENSG00000048405.10	ZNF800
ENSG00000048471.14	SNX29
ENSG00000048740.18	CELF2
ENSG00000048828.17	FAM120A
ENSG00000049130.16	KITLG
ENSG00000049245.13	VAMP3
ENSG00000049449.10	RCN1
ENSG00000049618.24	ARID1B
ENSG00000049656.14	CLPTM1L
ENSG00000050393.11	MCUR1
ENSG00000051825.15	MPHOSPH9
ENSG00000052723.12	SIKE1
ENSG00000053254.16	FOXN3
ENSG00000054116.12	TRAPPC3
ENSG00000054277.14	OPN3
ENSG00000054523.18	KIF1B
ENSG00000054598.9	FOXC1
ENSG00000054793.14	ATP9A
ENSG00000055208.19	TAB2
ENSG00000055332.18	EIF2AK2
ENSG00000055609.19	KMT2C
ENSG00000055917.16	PUM2
ENSG00000056097.16	ZFR
ENSG00000056586.16	RC3H2
ENSG00000057019.16	DCBLD2
ENSG00000057294.15	PKP2
ENSG00000057608.17	GDI2
ENSG00000057663.16	ATG5
ENSG00000058056.9	USP13
ENSG00000058063.16	ATP11B
ENSG00000058262.10	SEC61A1
ENSG00000058272.19	PPP1R12A
ENSG00000058673.17	ZC3H11A
ENSG00000058804.12	NDC1
ENSG00000059728.11	MXD1
ENSG00000059758.8	CDK17
ENSG00000060138.13	YBX3
ENSG00000060237.18	WNK1
ENSG00000060339.14	CCAR1
ENSG00000060749.16	QSER1
ENSG00000060982.15	BCAT1
ENSG00000061676.15	NCKAP1
ENSG00000061794.13	MRPS35
ENSG00000062485.19	CS
ENSG00000062650.19	WAPL
ENSG00000062725.10	APPBP2
ENSG00000063046.18	EIF4B
ENSG00000063587.15	ZNF275
ENSG00000063601.17	MTMR1
ENSG00000063978.16	RNF4
ENSG00000064115.11	TM7SF3
ENSG00000064225.12	ST3GAL6
ENSG00000064393.16	HIPK2
ENSG00000064419.13	TNPO3
ENSG00000064651.14	SLC12A2
ENSG00000064726.10	BTBD1
ENSG00000065000.19	AP3D1
ENSG00000065060.17	UHRF1BP1
ENSG00000065135.12	GNAI3
ENSG00000065150.21	IPO5
ENSG00000065243.20	PKN2
ENSG00000065328.17	MCM10
ENSG00000065526.12	SPEN
ENSG00000065548.18	ZC3H15
ENSG00000065613.15	SLK
ENSG00000065615.14	CYB5R4
ENSG00000065665.21	SEC61A2
ENSG00000065809.13	FAM107B
ENSG00000065833.9	ME1
ENSG00000065911.13	MTHFD2
ENSG00000065923.10	SLC9A7
ENSG00000065978.19	YBX1
ENSG00000066032.18	CTNNA2
ENSG00000066044.15	ELAVL1
ENSG00000066084.13	DIP2B
ENSG00000066117.15	SMARCD1
ENSG00000066279.18	ASPM
ENSG00000066583.12	ISOC1
ENSG00000066654.14	THUMPD1
ENSG00000067064.11	IDI1
ENSG00000067113.17	PLPP1
ENSG00000067167.8	TRAM1
ENSG00000067177.15	PHKA1
ENSG00000067225.18	PKM
ENSG00000067369.14	TP53BP1
ENSG00000067533.6	RRP15
ENSG00000067560.13	RHOA
ENSG00000067955.15	CBFB
ENSG00000067992.16	PDK3
ENSG00000068305.17	MEF2A
ENSG00000068366.20	ACSL4
ENSG00000068489.13	PRR11
ENSG00000068650.18	ATP11A
ENSG00000068796.19	KIF2A
ENSG00000069275.13	NUCKS1
ENSG00000069329.18	VPS35
ENSG00000069345.12	DNAJA2
ENSG00000069509.6	FUNDC1
ENSG00000069956.12	MAPK6
ENSG00000070087.14	PFN2
ENSG00000070367.16	EXOC5
ENSG00000070718.12	AP3M2
ENSG00000070756.17	PABPC1
ENSG00000070770.10	CSNK2A2
ENSG00000070831.17	CDC42
ENSG00000070961.16	ATP2B1
ENSG00000071073.13	MGAT4A
ENSG00000071082.11	RPL31
ENSG00000071242.12	RPS6KA2
ENSG00000071243.16	ING3
ENSG00000071537.14	SEL1L
ENSG00000071539.14	TRIP13
ENSG00000071626.17	DAZAP1
ENSG00000071794.16	HLTF
ENSG00000071909.19	MYO3B
ENSG00000071994.11	PDCD2
ENSG00000072041.17	SLC6A15
ENSG00000072210.19	ALDH3A2
ENSG00000072274.13	TFRC
ENSG00000072364.13	AFF4
ENSG00000072401.15	UBE2D1
ENSG00000072415.10	MPP5
ENSG00000072501.19	SMC1A
ENSG00000072571.20	HMMR
ENSG00000072736.19	NFATC3
ENSG00000072803.17	FBXW11
ENSG00000072849.11	DERL2
ENSG00000073584.20	SMARCE1
ENSG00000073803.14	MAP3K13
ENSG00000073969.18	NSF
ENSG00000074201.9	CLNS1A
ENSG00000074319.13	TSG101
ENSG00000074356.17	NCBP3
ENSG00000074695.6	LMAN1
ENSG00000074696.13	HACD3
ENSG00000074800.16	ENO1
ENSG00000075151.21	EIF4G3
ENSG00000075407.18	ZNF37A
ENSG00000075415.13	SLC25A3
ENSG00000075568.17	TMEM131
ENSG00000075624.17	ACTB
ENSG00000075785.14	RAB7A
ENSG00000075790.12	BCAP29
ENSG00000075975.17	MKRN2
ENSG00000076003.5	MCM6
ENSG00000076053.12	RBM7
ENSG00000076108.12	BAZ2A
ENSG00000076513.17	ANKRD13A
ENSG00000076554.15	TPD52
ENSG00000076685.19	NT5C2
ENSG00000076770.14	MBNL3
ENSG00000077147.16	TM9SF3
ENSG00000077585.14	GPR137B
ENSG00000077684.16	JADE1
ENSG00000077721.16	UBE2A
ENSG00000078140.14	UBE2K
ENSG00000078237.7	TIGAR
ENSG00000078246.17	TULP3
ENSG00000078304.19	PPP2R5C
ENSG00000078369.18	GNB1
ENSG00000078403.17	MLLT10
ENSG00000078747.16	ITCH
ENSG00000078795.17	PKD2L2
ENSG00000079246.16	XRCC5
ENSG00000079332.15	SAR1A
ENSG00000079482.13	OPHN1
ENSG00000080345.18	RIF1
ENSG00000080371.6	RAB21
ENSG00000080603.17	SRCAP
ENSG00000080608.10	PUM3
ENSG00000080815.19	PSEN1
ENSG00000080822.17	CLDND1
ENSG00000080824.19	HSP90AA1
ENSG00000081026.19	MAGI3
ENSG00000081087.15	OSTM1
ENSG00000081154.12	PCNP
ENSG00000081181.8	ARG2
ENSG00000081818.4	PCDHB4
ENSG00000081853.15	PCDHGA2
ENSG00000082146.13	STRADB
ENSG00000082153.18	BZW1
ENSG00000082212.13	ME2
ENSG00000082213.18	C5orf22
ENSG00000082397.17	EPB41L3
ENSG00000082701.17	GSK3B
ENSG00000082805.20	ERC1
ENSG00000082898.18	XPO1
ENSG00000083097.14	DOP1A
ENSG00000083099.11	LYRM2
ENSG00000083168.11	KAT6A
ENSG00000083312.17	TNPO1
ENSG00000083520.15	DIS3
ENSG00000083857.14	FAT1
ENSG00000083937.10	CHMP2B
ENSG00000084073.10	ZMPSTE24
ENSG00000084090.13	STARD7
ENSG00000084234.18	APLP2
ENSG00000084463.8	WBP11
ENSG00000084652.16	TXLNA
ENSG00000084733.11	RAB10
ENSG00000085224.23	ATRX
ENSG00000085231.14	AK6
ENSG00000085276.19	MECOM
ENSG00000085365.18	SCAMP1
ENSG00000085415.16	SEH1L
ENSG00000085449.15	WDFY1
ENSG00000085719.13	CPNE3
ENSG00000085721.13	RRN3
ENSG00000085832.17	EPS15
ENSG00000085871.9	MGST2
ENSG00000085872.15	CHERP
ENSG00000086065.14	CHMP5
ENSG00000086189.10	DIMT1
ENSG00000086200.17	IPO11
ENSG00000086232.13	EIF2AK1
ENSG00000086300.16	SNX10
ENSG00000086475.15	SEPHS1
ENSG00000086598.11	TMED2
ENSG00000086666.19	ZFAND6
ENSG00000086712.13	TXLNG
ENSG00000087053.20	MTMR2
ENSG00000087111.21	PIGS
ENSG00000087263.17	OGFOD1
ENSG00000087274.17	ADD1
ENSG00000087302.9	RTRAF
ENSG00000087448.11	KLHL42
ENSG00000087470.18	DNM1L
ENSG00000087586.18	AURKA
ENSG00000088247.17	KHSRP
ENSG00000088256.9	GNA11
ENSG00000088387.19	DOCK9
ENSG00000088832.18	FKBP1A
ENSG00000088854.12	C20orf194
ENSG00000088888.18	MAVS
ENSG00000088986.11	DYNLL1
ENSG00000089006.17	SNX5
ENSG00000089009.15	RPL6
ENSG00000089050.16	RBBP9
ENSG00000089057.15	SLC23A2
ENSG00000089063.15	TMEM230
ENSG00000089094.19	KDM2B
ENSG00000089159.16	PXN
ENSG00000089220.5	PEBP1
ENSG00000089234.16	BRAP
ENSG00000089335.21	ZNF302
ENSG00000089685.15	BIRC5
ENSG00000089693.11	MLF2
ENSG00000089737.17	DDX24
ENSG00000089775.12	ZBTB25
ENSG00000089876.12	DHX32
ENSG00000089902.10	RCOR1
ENSG00000090054.15	SPTLC1
ENSG00000090060.18	PAPOLA
ENSG00000090061.17	CCNK
ENSG00000090487.11	SPG21
ENSG00000090612.22	ZNF268
ENSG00000090857.14	PDPR
ENSG00000090905.19	TNRC6A
ENSG00000091009.8	RBM27
ENSG00000091039.17	OSBPL8
ENSG00000091129.21	NRCAM
ENSG00000091140.14	DLD
ENSG00000091164.13	TXNL1
ENSG00000091317.8	CMTM6
ENSG00000091436.17	MAP3K20
ENSG00000091527.16	CDV3
ENSG00000091542.9	ALKBH5
ENSG00000092140.16	G2E3
ENSG00000092148.13	HECTD1
ENSG00000092199.18	HNRNPC
ENSG00000092201.10	SUPT16H
ENSG00000092203.15	TOX4
ENSG00000092531.10	SNAP23
ENSG00000092621.13	PHGDH
ENSG00000092820.18	EZR
ENSG00000092847.13	AGO1
ENSG00000092853.14	CLSPN
ENSG00000092871.17	RFFL
ENSG00000093000.19	NUP50
ENSG00000093144.19	ECHDC1
ENSG00000093183.14	SEC22C
ENSG00000094880.11	CDC23
ENSG00000094916.16	CBX5
ENSG00000095139.14	ARCN1
ENSG00000095209.12	TMEM38B
ENSG00000095574.12	IKZF5
ENSG00000095787.23	WAC
ENSG00000096060.15	FKBP5
ENSG00000096063.16	SRPK1
ENSG00000096384.20	HSP90AB1
ENSG00000096401.8	CDC5L
ENSG00000096696.14	DSP
ENSG00000096717.12	SIRT1
ENSG00000097033.14	SH3GLB1
ENSG00000097046.13	CDC7
ENSG00000099194.6	SCD
ENSG00000099204.20	ABLIM1
ENSG00000099246.17	RAB18
ENSG00000099940.12	SNAP29
ENSG00000099942.13	CRKL
ENSG00000099968.18	BCL2L13
ENSG00000099995.19	SF3A1
ENSG00000100028.12	SNRPD3
ENSG00000100030.15	MAPK1
ENSG00000100129.18	EIF3L
ENSG00000100147.14	CCDC134
ENSG00000100201.23	DDX17
ENSG00000100219.16	XBP1
ENSG00000100225.18	FBXO7
ENSG00000100266.19	PACSIN2
ENSG00000100281.14	HMGXB4
ENSG00000100320.23	RBFOX2
ENSG00000100335.15	MIEF1
ENSG00000100350.15	FOXRED2
ENSG00000100354.21	TNRC6B
ENSG00000100380.14	ST13
ENSG00000100393.14	EP300
ENSG00000100410.8	PHF5A
ENSG00000100412.17	ACO2
ENSG00000100416.15	TRMU
ENSG00000100441.10	KHNYN
ENSG00000100473.18	COCH
ENSG00000100478.15	AP4S1
ENSG00000100503.26	NIN
ENSG00000100522.10	GNPNAT1
ENSG00000100528.12	CNIH1
ENSG00000100554.12	ATP6V1D
ENSG00000100568.11	VTI1B
ENSG00000100580.8	TMED8
ENSG00000100601.10	ALKBH1
ENSG00000100632.11	ERH
ENSG00000100644.17	HIF1A
ENSG00000100664.11	EIF5
ENSG00000100697.15	DICER1
ENSG00000100714.17	MTHFD1
ENSG00000100722.20	ZC3H14
ENSG00000100744.15	GSKIP
ENSG00000100796.17	PPP4R3A
ENSG00000100804.19	PSMB5
ENSG00000100811.14	YY1
ENSG00000100815.12	TRIP11
ENSG00000100852.13	ARHGAP5
ENSG00000100934.15	SEC23A
ENSG00000101003.10	GINS1
ENSG00000101057.16	MYBL2
ENSG00000101079.21	NDRG3
ENSG00000101082.14	SLA2
ENSG00000101084.18	RAB5IF
ENSG00000101109.12	STK4
ENSG00000101126.18	ADNP
ENSG00000101138.12	CSTF1
ENSG00000101166.16	PRELID3B
ENSG00000101182.15	PSMA7
ENSG00000101191.17	DIDO1
ENSG00000101224.17	CDC25B
ENSG00000101266.19	CSNK2A1
ENSG00000101290.14	CDS2
ENSG00000101363.12	MANBAL
ENSG00000101367.9	MAPRE1
ENSG00000101413.12	RPRD1B
ENSG00000101440.9	ASIP
ENSG00000101493.11	ZNF516
ENSG00000101544.9	ADNP2
ENSG00000101557.15	USP14
ENSG00000101558.14	VAPA
ENSG00000101608.13	MYL12A
ENSG00000101654.18	RNMT
ENSG00000101773.19	RBBP8
ENSG00000101811.14	CSTF2
ENSG00000101856.10	PGRMC1
ENSG00000101871.16	MID1
ENSG00000101911.13	PRPS2
ENSG00000101935.10	AMMECR1
ENSG00000101966.13	XIAP
ENSG00000101972.19	STAG2
ENSG00000101974.14	ATP11C
ENSG00000102024.18	PLS3
ENSG00000102054.18	RBBP7
ENSG00000102081.15	FMR1
ENSG00000102098.19	SCML2
ENSG00000102144.15	PGK1
ENSG00000102158.20	MAGT1
ENSG00000102189.17	EEA1
ENSG00000102218.6	RP2
ENSG00000102225.16	CDK16
ENSG00000102309.15	PIN4
ENSG00000102317.18	RBM3
ENSG00000102393.14	GLA
ENSG00000102409.10	BEX4
ENSG00000102471.14	NDFIP2
ENSG00000102531.16	FNDC3A
ENSG00000102572.15	STK24
ENSG00000102580.15	DNAJC3
ENSG00000102606.18	ARHGEF7
ENSG00000102753.10	KPNA3
ENSG00000102780.17	DGKH
ENSG00000102804.15	TSC22D1
ENSG00000102805.16	CLN5
ENSG00000102897.10	LYRM1
ENSG00000102908.22	NFAT5
ENSG00000102910.14	LONP2
ENSG00000102931.8	ARL2BP
ENSG00000102934.10	PLLP
ENSG00000102974.16	CTCF
ENSG00000103005.12	USB1
ENSG00000103018.17	CYB5B
ENSG00000103202.13	NME4
ENSG00000103257.9	SLC7A5
ENSG00000103342.13	GSPT1
ENSG00000103353.16	UBFD1
ENSG00000103365.15	GGA2
ENSG00000103404.14	USP31
ENSG00000103479.16	RBL2
ENSG00000103502.14	CDIPT
ENSG00000103540.16	CCP110
ENSG00000103740.10	ACSBG1
ENSG00000103769.10	RAB11A
ENSG00000103855.18	CD276
ENSG00000104067.17	TJP1
ENSG00000104131.13	EIF3J
ENSG00000104133.15	SPG11
ENSG00000104164.12	BLOC1S6
ENSG00000104219.13	ZDHHC2
ENSG00000104290.11	FZD3
ENSG00000104331.9	BPNT2
ENSG00000104341.17	LAPTM4B
ENSG00000104369.5	JPH1
ENSG00000104375.17	STK3
ENSG00000104388.15	RAB2A
ENSG00000104442.10	ARMC1
ENSG00000104447.13	TRPS1
ENSG00000104472.10	CHRAC1
ENSG00000104635.15	SLC39A14
ENSG00000104660.19	LEPROTL1
ENSG00000104695.13	PPP2CB
ENSG00000104738.18	MCM4
ENSG00000104763.20	ASAH1
ENSG00000104765.16	BNIP3L
ENSG00000104812.15	GYS1
ENSG00000104824.17	HNRNPL
ENSG00000105011.9	ASF1B
ENSG00000105058.12	FAM32A
ENSG00000105072.9	C19orf44
ENSG00000105171.10	POP4
ENSG00000105176.18	URI1
ENSG00000105193.9	RPS16
ENSG00000105220.17	GPI
ENSG00000105323.17	HNRNPUL1
ENSG00000105329.11	TGFB1
ENSG00000105341.19	DMAC2
ENSG00000105438.9	KDELR1
ENSG00000105810.10	CDK6
ENSG00000105819.14	PMPCB
ENSG00000105835.12	NAMPT
ENSG00000105849.6	POLR1F
ENSG00000105877.18	DNAH11
ENSG00000105879.12	CBLL1
ENSG00000105887.11	MTPN
ENSG00000105926.16	MPP6
ENSG00000105939.13	ZC3HAV1
ENSG00000105968.19	H2AZ2
ENSG00000105971.15	CAV2
ENSG00000105974.13	CAV1
ENSG00000105976.16	MET
ENSG00000105983.22	LMBR1
ENSG00000105993.15	DNAJB6
ENSG00000106025.9	TSPAN12
ENSG00000106031.9	HOXA13
ENSG00000106070.20	GRB10
ENSG00000106244.13	PDAP1
ENSG00000106246.18	PTCD1
ENSG00000106261.17	ZKSCAN1
ENSG00000106299.8	WASL
ENSG00000106344.8	RBM28
ENSG00000106460.19	TMEM106B
ENSG00000106546.14	AHR
ENSG00000106554.13	CHCHD3
ENSG00000106588.12	PSMA2
ENSG00000106608.17	URGCP
ENSG00000106609.16	TMEM248
ENSG00000106682.15	EIF4H
ENSG00000106692.15	FKTN
ENSG00000106723.17	SPIN1
ENSG00000106785.15	TRIM14
ENSG00000106799.13	TGFBR1
ENSG00000106853.20	PTGR1
ENSG00000107164.16	FUBP3
ENSG00000107185.10	RGP1
ENSG00000107341.5	UBE2R2
ENSG00000107372.13	ZFAND5
ENSG00000107443.16	CCNJ
ENSG00000107560.12	RAB11FIP2
ENSG00000107581.13	EIF3A
ENSG00000107651.13	SEC23IP
ENSG00000107669.18	ATE1
ENSG00000107771.17	CCSER2
ENSG00000107798.18	LIPA
ENSG00000107854.6	TNKS2
ENSG00000107863.18	ARHGAP21
ENSG00000107897.20	ACBD5
ENSG00000107929.15	LARP4B
ENSG00000107937.19	GTPBP4
ENSG00000107949.17	BCCIP
ENSG00000107951.15	MTPAP
ENSG00000108021.20	TASOR2
ENSG00000108061.12	SHOC2
ENSG00000108064.11	TFAM
ENSG00000108091.11	CCDC6
ENSG00000108175.17	ZMIZ1
ENSG00000108179.14	PPIF
ENSG00000108256.9	NUFIP2
ENSG00000108306.13	FBXL20
ENSG00000108389.9	MTMR4
ENSG00000108395.14	TRIM37
ENSG00000108406.10	DHX40
ENSG00000108424.11	KPNB1
ENSG00000108443.14	RPS6KB1
ENSG00000108468.15	CBX1
ENSG00000108510.10	MED13
ENSG00000108559.12	NUP88
ENSG00000108561.8	C1QBP
ENSG00000108578.15	BLMH
ENSG00000108582.12	CPD
ENSG00000108587.16	GOSR1
ENSG00000108588.14	CCDC47
ENSG00000108599.15	AKAP10
ENSG00000108654.16	DDX5
ENSG00000108671.11	PSMD11
ENSG00000108679.13	LGALS3BP
ENSG00000108684.15	ASIC2
ENSG00000108774.15	RAB5C
ENSG00000108829.10	LRRC59
ENSG00000108946.15	PRKAR1A
ENSG00000108953.17	YWHAE
ENSG00000109084.14	TMEM97
ENSG00000109118.14	PHF12
ENSG00000109133.13	TMEM33
ENSG00000109171.15	SLAIN2
ENSG00000109180.15	OCIAD1
ENSG00000109184.15	DCUN1D4
ENSG00000109270.13	LAMTOR3
ENSG00000109332.20	UBE2D3
ENSG00000109519.13	GRPEL1
ENSG00000109572.14	CLCN3
ENSG00000109586.12	GALNT7
ENSG00000109606.13	DHX15
ENSG00000109654.16	TRIM2
ENSG00000109685.19	NSD2
ENSG00000109787.13	KLF3
ENSG00000109805.10	NCAPG
ENSG00000109929.10	SC5D
ENSG00000109971.14	HSPA8
ENSG00000110075.15	PPP6R3
ENSG00000110104.13	CCDC86
ENSG00000110107.9	PRPF19
ENSG00000110172.12	CHORDC1
ENSG00000110321.19	EIF4G2
ENSG00000110344.10	UBE4A
ENSG00000110367.13	DDX6
ENSG00000110395.7	CBL
ENSG00000110422.12	HIPK3
ENSG00000110651.12	CD81
ENSG00000110660.15	SLC35F2
ENSG00000110693.18	SOX6
ENSG00000110696.10	C11orf58
ENSG00000110851.12	PRDM4
ENSG00000110880.11	CORO1C
ENSG00000110917.8	MLEC
ENSG00000110955.9	ATP5F1B
ENSG00000110958.16	PTGES3
ENSG00000110987.9	BCL7A
ENSG00000111011.18	RSRC2
ENSG00000111142.14	METAP2
ENSG00000111186.13	WNT5B
ENSG00000111224.14	PARP11
ENSG00000111247.15	RAD51AP1
ENSG00000111269.3	CREBL2
ENSG00000111276.11	CDKN1B
ENSG00000111328.7	CDK2AP1
ENSG00000111358.14	GTF2H3
ENSG00000111371.16	SLC38A1
ENSG00000111412.6	SPRING1
ENSG00000111445.14	RFC5
ENSG00000111481.10	COPZ1
ENSG00000111530.13	CAND1
ENSG00000111540.16	RAB5B
ENSG00000111605.18	CPSF6
ENSG00000111615.14	KRR1
ENSG00000111640.15	GAPDH
ENSG00000111669.15	TPI1
ENSG00000111676.15	ATN1
ENSG00000111707.12	SUDS3
ENSG00000111711.10	GOLT1B
ENSG00000111716.14	LDHB
ENSG00000111752.11	PHC1
ENSG00000111775.3	COX6A1
ENSG00000111780.8	AL021546.1
ENSG00000111786.9	SRSF9
ENSG00000111817.19	DSE
ENSG00000111880.16	RNGTT
ENSG00000111885.7	MAN1A1
ENSG00000111906.18	HDDC2
ENSG00000111911.7	HINT3
ENSG00000111912.20	NCOA7
ENSG00000112029.10	FBXO5
ENSG00000112031.16	MTRF1L
ENSG00000112081.17	SRSF3
ENSG00000112096.19	SOD2
ENSG00000112110.10	MRPL18
ENSG00000112167.10	SAYSD1
ENSG00000112182.15	BACH2
ENSG00000112208.11	BAG2
ENSG00000112210.12	RAB23
ENSG00000112234.9	FBXL4
ENSG00000112245.12	PTP4A1
ENSG00000112249.14	ASCC3
ENSG00000112290.13	WASF1
ENSG00000112305.15	SMAP1
ENSG00000112308.13	C6orf62
ENSG00000112309.11	B3GAT2
ENSG00000112312.10	GMNN
ENSG00000112319.19	EYA4
ENSG00000112335.15	SNX3
ENSG00000112378.12	PERP
ENSG00000112379.9	ARFGEF3
ENSG00000112406.5	HECA
ENSG00000112419.14	PHACTR2
ENSG00000112425.16	EPM2A
ENSG00000112531.17	QKI
ENSG00000112697.17	TMEM30A
ENSG00000112739.17	PRPF4B
ENSG00000112837.17	TBX18
ENSG00000112851.15	ERBIN
ENSG00000112996.11	MRPS30
ENSG00000113048.17	MRPS27
ENSG00000113068.10	PFDN1
ENSG00000113163.18	CERT1
ENSG00000113194.13	FAF2
ENSG00000113282.14	CLINT1
ENSG00000113300.13	CNOT6
ENSG00000113328.19	CCNG1
ENSG00000113368.12	LMNB1
ENSG00000113384.14	GOLPH3
ENSG00000113387.12	SUB1
ENSG00000113441.16	LNPEP
ENSG00000113456.19	RAD1
ENSG00000113522.14	RAD50
ENSG00000113552.16	GNPDA1
ENSG00000113558.19	SKP1
ENSG00000113569.16	NUP155
ENSG00000113575.10	PPP2CA
ENSG00000113580.15	NR3C1
ENSG00000113583.8	C5orf15
ENSG00000113594.10	LIFR
ENSG00000113615.13	SEC24A
ENSG00000113638.14	TTC33
ENSG00000113649.11	TCERG1
ENSG00000113658.18	SMAD5
ENSG00000113712.19	CSNK1A1
ENSG00000113732.9	ATP6V0E1
ENSG00000113739.10	STC2
ENSG00000113742.14	CPEB4
ENSG00000114030.13	KPNA1
ENSG00000114054.14	PCCB
ENSG00000114062.22	UBE3A
ENSG00000114120.14	SLC25A36
ENSG00000114126.18	TFDP2
ENSG00000114209.15	PDCD10
ENSG00000114251.15	WNT5A
ENSG00000114302.16	PRKAR2A
ENSG00000114439.19	BBX
ENSG00000114450.11	GNB4
ENSG00000114503.11	NCBP2
ENSG00000114573.10	ATP6V1A
ENSG00000114686.9	MRPL3
ENSG00000114850.7	SSR3
ENSG00000114857.18	NKTR
ENSG00000114861.23	FOXP1
ENSG00000114867.22	EIF4G1
ENSG00000114933.16	INO80D
ENSG00000114978.18	MOB1A
ENSG00000115053.17	NCL
ENSG00000115084.15	SLC35F5
ENSG00000115145.10	STAM2
ENSG00000115159.16	GPD2
ENSG00000115233.12	PSMD14
ENSG00000115239.24	ASB3
ENSG00000115241.11	PPM1G
ENSG00000115306.16	SPTBN1
ENSG00000115310.18	RTN4
ENSG00000115364.14	MRPL19
ENSG00000115365.12	LANCL1
ENSG00000115415.20	STAT1
ENSG00000115464.15	USP34
ENSG00000115484.15	CCT4
ENSG00000115486.12	GGCX
ENSG00000115514.12	TXNDC9
ENSG00000115520.8	COQ10B
ENSG00000115540.15	MOB4
ENSG00000115561.16	CHMP3
ENSG00000115677.17	HDLBP
ENSG00000115806.13	GORASP2
ENSG00000115808.12	STRN
ENSG00000115816.15	CEBPZ
ENSG00000115825.11	PRKD3
ENSG00000115839.18	RAB3GAP1
ENSG00000115875.19	SRSF7
ENSG00000115947.14	ORC4
ENSG00000115966.17	ATF2
ENSG00000116005.12	PCYOX1
ENSG00000116030.17	SUMO1
ENSG00000116095.11	PLEKHA3
ENSG00000116127.19	ALMS1
ENSG00000116133.13	DHCR24
ENSG00000116171.19	SCP2
ENSG00000116209.12	TMEM59
ENSG00000116237.16	ICMT
ENSG00000116251.11	RPL22
ENSG00000116350.17	SRSF4
ENSG00000116459.11	ATP5PB
ENSG00000116473.14	RAP1A
ENSG00000116489.13	CAPZA1
ENSG00000116560.11	SFPQ
ENSG00000116574.6	RHOU
ENSG00000116667.15	C1orf21
ENSG00000116678.20	LEPR
ENSG00000116698.21	SMG7
ENSG00000116729.14	WLS
ENSG00000116747.13	RO60
ENSG00000116750.14	UCHL5
ENSG00000116752.6	BCAS2
ENSG00000116754.13	SRSF11
ENSG00000116874.12	WARS2
ENSG00000116903.7	EXOC8
ENSG00000116918.15	TSNAX
ENSG00000116962.15	NID1
ENSG00000116984.14	MTR
ENSG00000117000.9	RLF
ENSG00000117020.18	AKT3
ENSG00000117054.14	ACADM
ENSG00000117114.20	ADGRL2
ENSG00000117133.11	RPF1
ENSG00000117155.17	SSX2IP
ENSG00000117174.11	ZNHIT6
ENSG00000117222.14	RBBP5
ENSG00000117335.20	CD46
ENSG00000117450.15	PRDX1
ENSG00000117500.13	TMED5
ENSG00000117505.13	DR1
ENSG00000117519.16	CNN3
ENSG00000117523.16	PRRC2C
ENSG00000117528.14	ABCD3
ENSG00000117569.19	PTBP2
ENSG00000117592.9	PRDX6
ENSG00000117602.13	RCAN3
ENSG00000117632.23	STMN1
ENSG00000117713.20	ARID1A
ENSG00000117724.13	CENPF
ENSG00000117748.10	RPA2
ENSG00000117751.18	PPP1R8
ENSG00000117859.19	OSBPL9
ENSG00000117868.17	ESYT2
ENSG00000117899.11	MESD
ENSG00000118058.23	KMT2A
ENSG00000118200.14	CAMSAP2
ENSG00000118217.6	ATF6
ENSG00000118276.11	B4GALT6
ENSG00000118363.12	SPCS2
ENSG00000118412.13	CASP8AP2
ENSG00000118418.14	HMGN3
ENSG00000118482.12	PHF3
ENSG00000118579.13	MED28
ENSG00000118680.14	MYL12B
ENSG00000118689.15	FOXO3
ENSG00000118816.11	CCNI
ENSG00000118873.16	RAB3GAP2
ENSG00000118922.17	KLF12
ENSG00000118961.15	LDAH
ENSG00000118971.9	CCND2
ENSG00000118985.16	ELL2
ENSG00000119042.17	SATB2
ENSG00000119185.13	ITGB1BP1
ENSG00000119280.17	C1orf198
ENSG00000119314.16	PTBP3
ENSG00000119318.13	RAD23B
ENSG00000119328.12	ABITRAM
ENSG00000119335.17	SET
ENSG00000119396.11	RAB14
ENSG00000119402.17	FBXW2
ENSG00000119414.12	PPP6C
ENSG00000119446.14	RBM18
ENSG00000119537.18	KDSR
ENSG00000119547.6	ONECUT2
ENSG00000119616.11	FCF1
ENSG00000119729.12	RHOQ
ENSG00000119760.16	SUPT7L
ENSG00000119787.14	ATL2
ENSG00000119820.11	YIPF4
ENSG00000119906.13	SLF2
ENSG00000119912.18	IDE
ENSG00000119929.13	CUTC
ENSG00000119950.21	MXI1
ENSG00000119953.14	SMNDC1
ENSG00000119969.15	HELLS
ENSG00000120063.10	GNA13
ENSG00000120071.15	KANSL1
ENSG00000120137.7	PANK3
ENSG00000120162.10	MOB3B
ENSG00000120253.14	NUP43
ENSG00000120256.11	LRP11
ENSG00000120306.11	CYSTM1
ENSG00000120438.12	TCP1
ENSG00000120539.15	MASTL
ENSG00000120685.20	PROSER1
ENSG00000120690.16	ELF1
ENSG00000120693.14	SMAD9
ENSG00000120705.13	ETF1
ENSG00000120709.11	FAM53C
ENSG00000120725.13	SIL1
ENSG00000120727.13	PAIP2
ENSG00000120733.14	KDM3B
ENSG00000120742.11	SERP1
ENSG00000120756.13	PLS1
ENSG00000120802.14	TMPO
ENSG00000120805.14	ARL1
ENSG00000120820.12	GLT8D2
ENSG00000120948.18	TARDBP
ENSG00000120992.18	LYPLA1
ENSG00000121060.18	TRIM25
ENSG00000121274.14	TENT4B
ENSG00000121380.12	BCL2L14
ENSG00000121579.13	NAA50
ENSG00000121644.19	DESI2
ENSG00000121774.18	KHDRBS1
ENSG00000121892.15	PDS5A
ENSG00000121940.16	CLCC1
ENSG00000121957.15	GPSM2
ENSG00000121988.18	ZRANB3
ENSG00000122012.14	SV2C
ENSG00000122042.10	UBL3
ENSG00000122068.13	FYTTD1
ENSG00000122126.17	OCRL
ENSG00000122203.15	KIAA1191
ENSG00000122218.16	COPA
ENSG00000122257.20	RBBP6
ENSG00000122477.13	LRRC39
ENSG00000122482.21	ZNF644
ENSG00000122545.20	SEPTIN7
ENSG00000122565.19	CBX3
ENSG00000122566.22	HNRNPA2B1
ENSG00000122674.12	CCZ1
ENSG00000122705.17	CLTA
ENSG00000122779.18	TRIM24
ENSG00000122783.17	CYREN
ENSG00000122786.20	CALD1
ENSG00000122870.12	BICC1
ENSG00000122952.17	ZWINT
ENSG00000122958.15	VPS26A
ENSG00000123080.12	CDKN2C
ENSG00000123091.5	RNF11
ENSG00000123094.15	RASSF8
ENSG00000123200.17	ZC3H13
ENSG00000123213.23	NLN
ENSG00000123416.15	TUBA1B
ENSG00000123472.12	ATPAF1
ENSG00000123473.16	STIL
ENSG00000123505.19	AMD1
ENSG00000123562.18	MORF4L2
ENSG00000123575.9	FAM199X
ENSG00000123636.18	BAZ2B
ENSG00000123684.13	LPGAT1
ENSG00000123728.10	RAP2C
ENSG00000123836.15	PFKFB2
ENSG00000123908.12	AGO2
ENSG00000123975.5	CKS2
ENSG00000123983.14	ACSL3
ENSG00000124098.10	FAM210B
ENSG00000124160.12	NCOA5
ENSG00000124164.16	VAPB
ENSG00000124177.15	CHD6
ENSG00000124193.16	SRSF6
ENSG00000124207.17	CSE1L
ENSG00000124208.16	PEDS1-UBE2V1
ENSG00000124214.20	STAU1
ENSG00000124226.11	RNF114
ENSG00000124333.16	VAMP7
ENSG00000124333.16_PAR_Y	VAMP7
ENSG00000124422.12	USP22
ENSG00000124486.13	USP9X
ENSG00000124733.5	MEA1
ENSG00000124766.7	SOX4
ENSG00000124767.7	GLO1
ENSG00000124783.14	SSR1
ENSG00000124789.12	NUP153
ENSG00000124795.17	DEK
ENSG00000124831.19	LRRFIP1
ENSG00000125107.18	CNOT1
ENSG00000125124.13	BBS2
ENSG00000125166.13	GOT2
ENSG00000125249.7	RAP2A
ENSG00000125257.16	ABCC4
ENSG00000125266.8	EFNB2
ENSG00000125304.10	TM9SF2
ENSG00000125484.12	GTF3C4
ENSG00000125648.15	SLC25A23
ENSG00000125686.12	MED1
ENSG00000125691.14	RPL23
ENSG00000125695.12	AC046185.1
ENSG00000125812.16	GZF1
ENSG00000125850.11	OVOL2
ENSG00000125868.16	DSTN
ENSG00000125944.21	HNRNPR
ENSG00000125970.12	RALY
ENSG00000125977.7	EIF2S2
ENSG00000126003.7	PLAGL2
ENSG00000126012.12	KDM5C
ENSG00000126067.12	PSMB2
ENSG00000126247.11	CAPNS1
ENSG00000126261.13	UBA2
ENSG00000126524.10	SBDS
ENSG00000126581.13	BECN1
ENSG00000126698.11	DNAJC8
ENSG00000126749.16	EMG1
ENSG00000126767.18	ELK1
ENSG00000126945.9	HNRNPH2
ENSG00000127022.15	CANX
ENSG00000127314.18	RAP1B
ENSG00000127418.15	FGFRL1
ENSG00000127483.19	HP1BP3
ENSG00000127530.4	OR7C1
ENSG00000127928.13	GNGT1
ENSG00000128000.17	ZNF780B
ENSG00000128050.9	PAICS
ENSG00000128059.8	PPAT
ENSG00000128245.15	YWHAH
ENSG00000128272.15	ATF4
ENSG00000128463.13	EMC4
ENSG00000128585.18	MKLN1
ENSG00000128595.17	CALU
ENSG00000128607.14	KLHDC10
ENSG00000128710.6	HOXD10
ENSG00000128789.21	PSMG2
ENSG00000128791.12	TWSG1
ENSG00000128829.12	EIF2AK4
ENSG00000128918.15	ALDH1A2
ENSG00000128923.11	MINDY2
ENSG00000128973.13	CLN6
ENSG00000128989.11	ARPP19
ENSG00000129055.13	ANAPC13
ENSG00000129084.18	PSMA1
ENSG00000129116.19	PALLD
ENSG00000129128.13	SPCS3
ENSG00000129197.14	RPAIN
ENSG00000129315.11	CCNT1
ENSG00000129317.15	PUS7L
ENSG00000129351.17	ILF3
ENSG00000129422.14	MTUS1
ENSG00000129515.20	SNX6
ENSG00000129625.13	REEP5
ENSG00000129657.16	SEC14L1
ENSG00000129810.15	SGO1
ENSG00000130021.15	PUDP
ENSG00000130024.15	PHF10
ENSG00000130119.17	GNL3L
ENSG00000130227.17	XPO7
ENSG00000130402.13	ACTN4
ENSG00000130449.6	ZSWIM6
ENSG00000130713.16	EXOSC2
ENSG00000130717.13	UCK1
ENSG00000130723.21	PRRC2B
ENSG00000130741.11	EIF2S3
ENSG00000130764.10	LRRC47
ENSG00000130935.10	NOL11
ENSG00000131016.17	AKAP12
ENSG00000131023.13	LATS1
ENSG00000131051.24	RBM39
ENSG00000131115.16	ZNF227
ENSG00000131127.14	ZNF141
ENSG00000131149.19	GSE1
ENSG00000131236.18	CAP1
ENSG00000131238.18	PPT1
ENSG00000131263.13	RLIM
ENSG00000131355.15	ADGRE3
ENSG00000131368.8	MRPS25
ENSG00000131374.14	TBC1D5
ENSG00000131381.12	RBSN
ENSG00000131462.8	TUBG1
ENSG00000131467.11	PSME3
ENSG00000131473.17	ACLY
ENSG00000131503.21	ANKHD1
ENSG00000131507.11	NDFIP1
ENSG00000131508.16	UBE2D2
ENSG00000131626.19	PPFIA1
ENSG00000131711.15	MAP1B
ENSG00000131747.15	TOP2A
ENSG00000131773.14	KHDRBS3
ENSG00000131828.14	PDHA1
ENSG00000131844.16	MCCC2
ENSG00000132122.12	SPATA6
ENSG00000132199.20	ENOSF1
ENSG00000132256.19	TRIM5
ENSG00000132313.15	MRPL35
ENSG00000132341.12	RAN
ENSG00000132356.11	PRKAA1
ENSG00000132383.12	RPA1
ENSG00000132388.12	UBE2G1
ENSG00000132436.11	FIGNL1
ENSG00000132463.14	GRSF1
ENSG00000132466.19	ANKRD17
ENSG00000132471.12	WBP2
ENSG00000132475.10	H3-3B
ENSG00000132485.14	ZRANB2
ENSG00000132507.18	EIF5A
ENSG00000132522.16	GPS2
ENSG00000132570.15	PCBD2
ENSG00000132589.16	FLOT2
ENSG00000132640.15	BTBD3
ENSG00000132664.12	POLR3F
ENSG00000132680.11	KHDC4
ENSG00000132763.15	MMACHC
ENSG00000132824.14	SERINC3
ENSG00000132846.6	ZBED3
ENSG00000132912.13	DCTN4
ENSG00000132953.16	XPO4
ENSG00000132970.14	WASF3
ENSG00000133026.13	MYH10
ENSG00000133030.22	MPRIP
ENSG00000133065.11	SLC41A1
ENSG00000133112.17	TPT1
ENSG00000133119.13	RFC3
ENSG00000133124.11	IRS4
ENSG00000133195.11	SLC39A11
ENSG00000133226.17	SRRM1
ENSG00000133318.14	RTN3
ENSG00000133641.18	C12orf29
ENSG00000133657.16	ATP13A3
ENSG00000133687.16	TMTC1
ENSG00000133703.13	KRAS
ENSG00000133704.10	IPO8
ENSG00000133706.19	LARS1
ENSG00000133731.10	IMPA1
ENSG00000133812.16	SBF2
ENSG00000133835.17	HSD17B4
ENSG00000133872.14	SARAF
ENSG00000133983.16	COX16
ENSG00000134001.15	EIF2S1
ENSG00000134042.14	MRO
ENSG00000134046.12	MBD2
ENSG00000134049.6	IER3IP1
ENSG00000134077.16	THUMPD3
ENSG00000134086.8	VHL
ENSG00000134108.14	ARL8B
ENSG00000134243.12	SORT1
ENSG00000134247.10	PTGFRN
ENSG00000134250.20	NOTCH2
ENSG00000134265.13	NAPG
ENSG00000134278.15	SPIRE1
ENSG00000134283.18	PPHLN1
ENSG00000134287.10	ARF3
ENSG00000134294.14	SLC38A2
ENSG00000134308.14	YWHAQ
ENSG00000134333.14	LDHA
ENSG00000134352.20	IL6ST
ENSG00000134375.11	TIMM17A
ENSG00000134440.12	NARS1
ENSG00000134590.14	RTL8C
ENSG00000134602.16	STK26
ENSG00000134644.16	PUM1
ENSG00000134684.11	YARS1
ENSG00000134709.12	HOOK1
ENSG00000134717.18	BTF3L4
ENSG00000134744.14	TUT4
ENSG00000134748.13	PRPF38A
ENSG00000134758.14	RNF138
ENSG00000134779.15	TPGS2
ENSG00000134824.14	FADS2
ENSG00000134970.14	TMED7
ENSG00000134982.17	APC
ENSG00000135002.12	RFK
ENSG00000135018.14	UBQLN1
ENSG00000135052.16	GOLM1
ENSG00000135069.14	PSAT1
ENSG00000135070.15	ISCA1
ENSG00000135108.15	FBXO21
ENSG00000135241.17	PNPLA8
ENSG00000135250.17	SRPK2
ENSG00000135272.12	MDFIC
ENSG00000135316.19	SYNCRIP
ENSG00000135333.14	EPHA7
ENSG00000135336.15	ORC3
ENSG00000135341.18	MAP3K7
ENSG00000135387.21	CAPRIN1
ENSG00000135486.19	HNRNPA1
ENSG00000135535.17	CD164
ENSG00000135577.4	NMBR
ENSG00000135677.11	GNS
ENSG00000135678.12	CPM
ENSG00000135679.25	MDM2
ENSG00000135766.9	EGLN1
ENSG00000135821.19	GLUL
ENSG00000135837.16	CEP350
ENSG00000135870.12	RC3H1
ENSG00000135916.16	ITM2C
ENSG00000135932.11	CAB39
ENSG00000136003.16	ISCU
ENSG00000136021.19	SCYL2
ENSG00000136100.14	VPS36
ENSG00000136108.15	CKAP2
ENSG00000136111.14	TBC1D4
ENSG00000136114.17	THSD1
ENSG00000136143.16	SUCLA2
ENSG00000136159.4	NUDT15
ENSG00000136193.17	SCRN1
ENSG00000136231.14	IGF2BP3
ENSG00000136238.18	RAC1
ENSG00000136240.10	KDELR2
ENSG00000136261.15	BZW2
ENSG00000136379.12	ABHD17C
ENSG00000136381.13	IREB2
ENSG00000136404.16	TM6SF1
ENSG00000136450.13	SRSF1
ENSG00000136451.9	VEZF1
ENSG00000136485.15	DCAF7
ENSG00000136504.13	KAT7
ENSG00000136527.18	TRA2B
ENSG00000136536.15	MARCHF7
ENSG00000136603.14	SKIL
ENSG00000136628.18	EPRS1
ENSG00000136636.13	KCTD3
ENSG00000136718.10	IMP4
ENSG00000136754.18	ABI1
ENSG00000136758.19	YME1L1
ENSG00000136824.19	SMC2
ENSG00000136938.9	ANP32B
ENSG00000136986.10	DERL1
ENSG00000137073.23	UBAP2
ENSG00000137074.20	APTX
ENSG00000137075.18	RNF38
ENSG00000137154.13	RPS6
ENSG00000137168.8	PPIL1
ENSG00000137309.20	HMGA1
ENSG00000137409.19	MTCH1
ENSG00000137414.6	FAM8A1
ENSG00000137504.14	CREBZF
ENSG00000137575.12	SDCBP
ENSG00000137693.14	YAP1
ENSG00000137710.17	RDX
ENSG00000137804.14	NUSAP1
ENSG00000137807.16	KIF23
ENSG00000137818.12	RPLP1
ENSG00000137822.13	TUBGCP4
ENSG00000137845.15	ADAM10
ENSG00000137944.18	KYAT3
ENSG00000137992.14	DBT
ENSG00000138018.18	SELENOI
ENSG00000138069.18	RAB1A
ENSG00000138071.14	ACTR2
ENSG00000138078.16	PREPL
ENSG00000138079.14	SLC3A1
ENSG00000138081.21	FBXO11
ENSG00000138138.13	ATAD1
ENSG00000138160.7	KIF11
ENSG00000138180.16	CEP55
ENSG00000138279.16	ANXA7
ENSG00000138286.15	FAM149B1
ENSG00000138303.18	ASCC1
ENSG00000138336.9	TET1
ENSG00000138386.17	NAB1
ENSG00000138413.14	IDH1
ENSG00000138430.16	OLA1
ENSG00000138443.17	ABI2
ENSG00000138448.12	ITGAV
ENSG00000138468.16	SENP7
ENSG00000138594.14	TMOD3
ENSG00000138604.10	GLCE
ENSG00000138614.15	INTS14
ENSG00000138668.19	HNRNPD
ENSG00000138674.17	SEC31A
ENSG00000138750.15	NUP54
ENSG00000138757.15	G3BP2
ENSG00000138758.12	SEPTIN11
ENSG00000138759.19	FRAS1
ENSG00000138760.10	SCARB2
ENSG00000138767.13	CNOT6L
ENSG00000138814.17	PPP3CA
ENSG00000138829.12	FBN2
ENSG00000139131.13	YARS2
ENSG00000139133.7	ALG10
ENSG00000139146.14	SINHCAF
ENSG00000139154.16	AEBP2
ENSG00000139163.16	ETNK1
ENSG00000139278.10	GLIPR1
ENSG00000139291.14	TMEM19
ENSG00000139324.12	TMTC3
ENSG00000139437.18	TCHP
ENSG00000139496.16	NUP58
ENSG00000139514.13	SLC7A1
ENSG00000139537.11	CCDC65
ENSG00000139625.13	MAP3K12
ENSG00000139644.13	TMBIM6
ENSG00000139684.15	ESD
ENSG00000139687.16	RB1
ENSG00000139726.11	DENR
ENSG00000139737.22	SLAIN1
ENSG00000139746.16	RBM26
ENSG00000139793.18	MBNL2
ENSG00000139800.8	ZIC5
ENSG00000139921.13	TMX1
ENSG00000139946.10	PELI2
ENSG00000140022.13	STON2
ENSG00000140105.18	WARS1
ENSG00000140157.15	NIPA2
ENSG00000140199.13	SLC12A6
ENSG00000140262.18	TCF12
ENSG00000140263.15	SORD
ENSG00000140297.13	GCNT3
ENSG00000140299.13	BNIP2
ENSG00000140307.11	GTF2A2
ENSG00000140319.11	SRP14
ENSG00000140350.15	ANP32A
ENSG00000140382.15	HMG20A
ENSG00000140391.15	TSPAN3
ENSG00000140396.13	NCOA2
ENSG00000140443.15	IGF1R
ENSG00000140479.18	PCSK6
ENSG00000140526.18	ABHD2
ENSG00000140718.21	FTO
ENSG00000140740.11	UQCRC2
ENSG00000140941.14	MAP1LC3B
ENSG00000140948.13	ZCCHC14
ENSG00000141027.21	NCOR1
ENSG00000141030.13	COPS3
ENSG00000141198.16	TOM1L1
ENSG00000141219.15	C17orf80
ENSG00000141367.12	CLTC
ENSG00000141378.15	PTRH2
ENSG00000141380.14	SS18
ENSG00000141404.17	GNAL
ENSG00000141424.13	SLC39A6
ENSG00000141425.18	RPRD1A
ENSG00000141429.13	GALNT1
ENSG00000141441.16	GAREM1
ENSG00000141447.18	OSBPL1A
ENSG00000141448.11	GATA6
ENSG00000141522.12	ARHGDIA
ENSG00000141543.12	EIF4A3
ENSG00000141568.21	FOXK2
ENSG00000141576.16	RNF157
ENSG00000141580.16	WDR45B
ENSG00000141646.14	SMAD4
ENSG00000141682.12	PMAIP1
ENSG00000141698.17	NT5C3B
ENSG00000141699.11	RETREG3
ENSG00000141837.21	CACNA1A
ENSG00000141956.14	PRDM15
ENSG00000141979.4	AC008764.1
ENSG00000142166.13	IFNAR1
ENSG00000142168.15	SOD1
ENSG00000142188.17	TMEM50B
ENSG00000142192.21	APP
ENSG00000142599.19	RERE
ENSG00000142657.21	PGD
ENSG00000142676.14	RPL11
ENSG00000142856.17	ITGB3BP
ENSG00000142864.15	SERBP1
ENSG00000142875.19	PRKACB
ENSG00000143153.13	ATP1B1
ENSG00000143155.13	TIPRL
ENSG00000143157.12	POGK
ENSG00000143162.9	CREG1
ENSG00000143183.18	TMCO1
ENSG00000143190.23	POU2F1
ENSG00000143222.12	UFC1
ENSG00000143252.16	SDHC
ENSG00000143315.8	PIGM
ENSG00000143321.19	HDGF
ENSG00000143337.19	TOR1AIP1
ENSG00000143376.14	SNX27
ENSG00000143384.14	MCL1
ENSG00000143390.18	RFX5
ENSG00000143398.20	PIP5K1A
ENSG00000143401.15	ANP32E
ENSG00000143418.20	CERS2
ENSG00000143420.19	ENSA
ENSG00000143436.11	MRPL9
ENSG00000143442.22	POGZ
ENSG00000143457.11	GOLPH3L
ENSG00000143473.13	KCNH1
ENSG00000143476.18	DTL
ENSG00000143493.13	INTS7
ENSG00000143499.14	SMYD2
ENSG00000143514.17	TP53BP2
ENSG00000143549.21	TPM3
ENSG00000143569.19	UBAP2L
ENSG00000143612.21	C1orf43
ENSG00000143614.10	GATAD2B
ENSG00000143641.10	GALNT2
ENSG00000143674.11	MAP3K21
ENSG00000143702.16	CEP170
ENSG00000143727.16	ACP1
ENSG00000143740.14	SNAP47
ENSG00000143742.14	SRP9
ENSG00000143751.10	SDE2
ENSG00000143753.13	DEGS1
ENSG00000143756.12	FBXO28
ENSG00000143761.16	ARF1
ENSG00000143771.12	CNIH4
ENSG00000143797.12	MBOAT2
ENSG00000143799.14	PARP1
ENSG00000143815.15	LBR
ENSG00000143870.13	PDIA6
ENSG00000143882.12	ATP6V1C2
ENSG00000143924.19	EML4
ENSG00000143933.19	CALM2
ENSG00000143970.17	ASXL2
ENSG00000144043.12	TEX261
ENSG00000144130.11	NT5DC4
ENSG00000144224.17	UBXN4
ENSG00000144229.12	THSD7B
ENSG00000144233.10	AMMECR1L
ENSG00000144283.22	PKP4
ENSG00000144354.14	CDCA7
ENSG00000144369.13	FAM171B
ENSG00000144381.18	HSPD1
ENSG00000144524.18	COPS7B
ENSG00000144560.15	VGLL4
ENSG00000144566.11	RAB5A
ENSG00000144674.16	GOLGA4
ENSG00000144724.20	PTPRG
ENSG00000144746.7	ARL6IP5
ENSG00000144820.8	ADGRG7
ENSG00000144840.10	RABL3
ENSG00000145012.13	LPP
ENSG00000145147.20	SLIT2
ENSG00000145244.12	CORIN
ENSG00000145284.12	SCD5
ENSG00000145293.16	ENOPH1
ENSG00000145337.5	PYURF
ENSG00000145354.12	CISD2
ENSG00000145362.20	ANK2
ENSG00000145386.11	CCNA2
ENSG00000145391.13	SETD7
ENSG00000145416.13	MARCHF1
ENSG00000145439.12	CBR4
ENSG00000145495.16	MARCHF6
ENSG00000145592.14	RPL37
ENSG00000145604.17	SKP2
ENSG00000145741.16	BTF3
ENSG00000145780.8	FEM1C
ENSG00000145782.13	ATG12
ENSG00000145817.17	YIPF5
ENSG00000145907.16	G3BP1
ENSG00000145975.15	FAM217A
ENSG00000146007.11	ZMAT2
ENSG00000146147.15	MLIP
ENSG00000146223.16	RPL7L1
ENSG00000146242.9	TPBG
ENSG00000146243.14	IRAK1BP1
ENSG00000146247.14	PHIP
ENSG00000146263.11	MMS22L
ENSG00000146278.11	PNRC1
ENSG00000146281.6	PM20D2
ENSG00000146425.11	DYNLT1
ENSG00000146433.9	TMEM181
ENSG00000146457.16	WTAP
ENSG00000146463.12	ZMYM4
ENSG00000146574.16	CCZ1B
ENSG00000146676.10	PURB
ENSG00000146729.10	NIPSNAP2
ENSG00000146731.11	CCT6A
ENSG00000146842.17	TMEM209
ENSG00000146859.6	TMEM140
ENSG00000146872.18	TLK2
ENSG00000146963.18	LUC7L2
ENSG00000147044.22	CASK
ENSG00000147065.17	MSN
ENSG00000147140.17	NONO
ENSG00000147164.12	SNX12
ENSG00000147180.17	ZNF711
ENSG00000147224.13	PRPS1
ENSG00000147274.14	RBMX
ENSG00000147403.18	RPL10
ENSG00000147475.17	ERLIN2
ENSG00000147533.17	GOLGA7
ENSG00000147548.17	NSD3
ENSG00000147649.10	MTDH
ENSG00000147669.11	POLR2K
ENSG00000147676.14	MAL2
ENSG00000147679.12	UTP23
ENSG00000147862.17	NFIB
ENSG00000147874.11	HAUS6
ENSG00000147883.12	CDKN2B
ENSG00000147955.17	SIGMAR1
ENSG00000148110.16	MFSD14B
ENSG00000148219.17	ASTN2
ENSG00000148229.13	POLE3
ENSG00000148248.14	SURF4
ENSG00000148429.14	USP6NL
ENSG00000148481.14	MINDY3
ENSG00000148484.18	RSU1
ENSG00000148498.16	PARD3
ENSG00000148516.22	ZEB1
ENSG00000148672.9	GLUD1
ENSG00000148700.15	ADD3
ENSG00000148730.7	EIF4EBP2
ENSG00000148737.17	TCF7L2
ENSG00000148773.14	MKI67
ENSG00000148798.11	INA
ENSG00000148943.12	LIN7C
ENSG00000149084.13	HSD17B12
ENSG00000149136.9	SSRP1
ENSG00000149187.18	CELF1
ENSG00000149212.12	SESN3
ENSG00000149308.17	NPAT
ENSG00000149313.11	AASDHPPT
ENSG00000149346.15	SLX4IP
ENSG00000149485.19	FADS1
ENSG00000149547.15	EI24
ENSG00000149554.13	CHEK1
ENSG00000149557.14	FEZ1
ENSG00000149658.18	YTHDF1
ENSG00000149948.14	HMGA2
ENSG00000149970.16	CNKSR2
ENSG00000150093.20	ITGB1
ENSG00000150347.16	ARID5B
ENSG00000150459.12	SAP18
ENSG00000150593.18	PDCD4
ENSG00000150672.17	DLG2
ENSG00000150753.12	CCT5
ENSG00000150760.13	DOCK1
ENSG00000150764.14	DIXDC1
ENSG00000150867.14	PIP4K2A
ENSG00000150907.10	FOXO1
ENSG00000150938.10	CRIM1
ENSG00000151092.18	NGLY1
ENSG00000151135.10	TMEM263
ENSG00000151151.6	IPMK
ENSG00000151233.11	GXYLT1
ENSG00000151239.14	TWF1
ENSG00000151247.12	EIF4E
ENSG00000151292.17	CSNK1G3
ENSG00000151304.6	SRFBP1
ENSG00000151414.15	NEK7
ENSG00000151422.13	FER
ENSG00000151466.12	SCLT1
ENSG00000151491.14	EPS8
ENSG00000151503.13	NCAPD3
ENSG00000151611.16	MMAA
ENSG00000151665.13	PIGF
ENSG00000151693.11	ASAP2
ENSG00000151806.14	GUF1
ENSG00000151835.16	SACS
ENSG00000151846.8	PABPC3
ENSG00000151893.15	CACUL1
ENSG00000151914.20	DST
ENSG00000151923.17	TIAL1
ENSG00000152056.17	AP1S3
ENSG00000152102.18	FAM168B
ENSG00000152104.12	PTPN14
ENSG00000152219.5	ARL14EP
ENSG00000152229.18	PSTPIP2
ENSG00000152234.16	ATP5F1A
ENSG00000152242.11	C18orf25
ENSG00000152270.9	PDE3B
ENSG00000152284.5	TCF7L1
ENSG00000152291.14	TGOLN2
ENSG00000152332.16	UHMK1
ENSG00000152348.16	ATG10
ENSG00000152409.9	JMY
ENSG00000152455.16	SUV39H2
ENSG00000152457.18	DCLRE1C
ENSG00000152495.11	CAMK4
ENSG00000152518.8	ZFP36L2
ENSG00000152558.15	TMEM123
ENSG00000152601.17	MBNL1
ENSG00000152661.9	GJA1
ENSG00000152683.14	SLC30A6
ENSG00000152700.14	SAR1B
ENSG00000152749.8	GPR180
ENSG00000152767.17	FARP1
ENSG00000152795.17	HNRNPDL
ENSG00000152904.11	GGPS1
ENSG00000152939.17	MARVELD2
ENSG00000152942.19	RAD17
ENSG00000152944.9	MED21
ENSG00000153006.16	SREK1IP1
ENSG00000153037.15	SRP19
ENSG00000153094.24	BCL2L11
ENSG00000153107.13	ANAPC1
ENSG00000153113.24	CAST
ENSG00000153130.17	SCOC
ENSG00000153147.6	SMARCA5
ENSG00000153162.9	BMP6
ENSG00000153187.20	HNRNPU
ENSG00000153201.16	RANBP2
ENSG00000153310.19	CYRIB
ENSG00000153317.15	ASAP1
ENSG00000153551.14	CMTM7
ENSG00000153558.16	FBXL2
ENSG00000153560.12	UBP1
ENSG00000153561.13	RMND5A
ENSG00000153827.14	TRIP12
ENSG00000153879.9	CEBPG
ENSG00000153885.14	KCTD15
ENSG00000153904.21	DDAH1
ENSG00000153914.16	SREK1
ENSG00000153922.11	CHD1
ENSG00000153936.17	HS2ST1
ENSG00000153944.12	MSI2
ENSG00000153956.16	CACNA2D1
ENSG00000153989.8	NUS1
ENSG00000154001.14	PPP2R5E
ENSG00000154122.14	ANKH
ENSG00000154162.15	CDH12
ENSG00000154274.15	C4orf19
ENSG00000154277.13	UCHL1
ENSG00000154380.17	ENAH
ENSG00000154429.11	CCSAP
ENSG00000154473.18	BUB3
ENSG00000154511.12	DIPK1A
ENSG00000154518.10	ATP5MC3
ENSG00000154611.15	PSMA8
ENSG00000154639.19	CXADR
ENSG00000154727.11	GABPA
ENSG00000154760.14	SLFN13
ENSG00000154920.15	EME1
ENSG00000154945.7	ANKRD40
ENSG00000155008.14	APOOL
ENSG00000155011.9	DKK2
ENSG00000155096.14	AZIN1
ENSG00000155097.12	ATP6V1C1
ENSG00000155189.12	AGPAT5
ENSG00000155330.10	C16orf87
ENSG00000155380.12	SLC16A1
ENSG00000155506.18	LARP1
ENSG00000155508.14	CNOT8
ENSG00000155850.8	SLC26A2
ENSG00000155903.13	RASA2
ENSG00000155959.12	VBP1
ENSG00000155962.13	CLIC2
ENSG00000156052.11	GNAQ
ENSG00000156110.15	ADK
ENSG00000156136.10	DCK
ENSG00000156234.7	CXCL13
ENSG00000156273.16	BACH1
ENSG00000156299.13	TIAM1
ENSG00000156304.15	SCAF4
ENSG00000156374.16	PCGF6
ENSG00000156411.10	ATP5MPL
ENSG00000156504.16	FAM122B
ENSG00000156531.17	PHF6
ENSG00000156642.17	NPTN
ENSG00000156650.14	KAT6B
ENSG00000156687.11	UNC5D
ENSG00000156875.14	MFSD14A
ENSG00000156928.5	MALSU1
ENSG00000157014.11	TATDN2
ENSG00000157045.9	NTAN1
ENSG00000157106.17	SMG1
ENSG00000157214.14	STEAP2
ENSG00000157224.16	CLDN12
ENSG00000157450.16	RNF111
ENSG00000157500.12	APPL1
ENSG00000157540.22	DYRK1A
ENSG00000157625.15	TAB3
ENSG00000157734.14	SNX22
ENSG00000157741.15	UBN2
ENSG00000157823.17	AP3S2
ENSG00000157837.16	SPPL3
ENSG00000157851.17	DPYSL5
ENSG00000157933.10	SKI
ENSG00000158055.16	GRHL3
ENSG00000158125.10	XDH
ENSG00000158195.11	WASF2
ENSG00000158270.12	COLEC12
ENSG00000158290.18	CUL4B
ENSG00000158321.18	AUTS2
ENSG00000158417.11	EIF5B
ENSG00000158435.8	CNOT11
ENSG00000158467.16	AHCYL2
ENSG00000158604.15	TMED4
ENSG00000158615.9	PPP1R15B
ENSG00000158710.15	TAGLN2
ENSG00000158711.14	ELK4
ENSG00000158966.16	CACHD1
ENSG00000158985.14	CDC42SE2
ENSG00000159023.22	EPB41
ENSG00000159128.15	IFNGR2
ENSG00000159131.17	GART
ENSG00000159140.21	SON
ENSG00000159147.18	DONSON
ENSG00000159217.10	IGF2BP1
ENSG00000159322.17	ADPGK
ENSG00000159346.13	ADIPOR1
ENSG00000159433.12	STARD9
ENSG00000159658.14	EFCAB14
ENSG00000159873.10	CCDC117
ENSG00000159917.17	ZNF235
ENSG00000160014.17	CALM3
ENSG00000160049.12	DFFA
ENSG00000160075.12	SSU72
ENSG00000160131.13	VMA21
ENSG00000160208.13	RRP1B
ENSG00000160213.9	CSTB
ENSG00000160216.21	AGPAT3
ENSG00000160352.16	ZNF714
ENSG00000160551.12	TAOK1
ENSG00000160679.13	CHTOP
ENSG00000160710.17	ADAR
ENSG00000160803.8	UBQLN4
ENSG00000161010.15	MRNIP
ENSG00000161011.20	SQSTM1
ENSG00000161202.20	DVL3
ENSG00000161405.17	IKZF3
ENSG00000161533.12	ACOX1
ENSG00000161547.17	SRSF2
ENSG00000161654.10	LSM12
ENSG00000161800.13	RACGAP1
ENSG00000161813.22	LARP4
ENSG00000161847.14	RAVER1
ENSG00000161960.16	EIF4A1
ENSG00000162129.14	CLPB
ENSG00000162368.13	CMPK1
ENSG00000162377.6	COA7
ENSG00000162378.13	ZYG11B
ENSG00000162407.9	PLPP3
ENSG00000162408.11	NOL9
ENSG00000162430.17	SELENON
ENSG00000162433.15	AK4
ENSG00000162441.12	LZIC
ENSG00000162520.15	SYNC
ENSG00000162521.19	RBBP4
ENSG00000162599.17	NFIA
ENSG00000162607.13	USP1
ENSG00000162613.17	FUBP1
ENSG00000162618.15	ADGRL4
ENSG00000162623.16	TYW3
ENSG00000162641.20	AKNAD1
ENSG00000162688.17	AGL
ENSG00000162695.12	SLC30A7
ENSG00000162702.8	ZNF281
ENSG00000162704.16	ARPC5
ENSG00000162735.19	PEX19
ENSG00000162775.16	RBM15
ENSG00000162819.12	BROX
ENSG00000162885.14	B3GALNT2
ENSG00000162909.18	CAPN2
ENSG00000162923.17	WDR26
ENSG00000162924.15	REL
ENSG00000162961.14	DPY30
ENSG00000162980.17	ARL5A
ENSG00000163029.16	SMC6
ENSG00000163041.13	H3-3A
ENSG00000163053.11	SLC16A14
ENSG00000163082.10	SGPP2
ENSG00000163104.18	SMARCAD1
ENSG00000163110.15	PDLIM5
ENSG00000163116.10	STPG2
ENSG00000163125.15	RPRD2
ENSG00000163257.11	DCAF16
ENSG00000163281.12	GNPDA2
ENSG00000163291.14	PAQR3
ENSG00000163320.12	CGGBP1
ENSG00000163349.22	HIPK1
ENSG00000163399.16	ATP1A1
ENSG00000163428.4	LRRC58
ENSG00000163430.12	FSTL1
ENSG00000163468.15	CCT3
ENSG00000163527.10	STT3B
ENSG00000163577.8	EIF5A2
ENSG00000163602.11	RYBP
ENSG00000163605.15	PPP4R2
ENSG00000163655.16	GMPS
ENSG00000163682.17	RPL9
ENSG00000163714.18	U2SURP
ENSG00000163754.18	GYG1
ENSG00000163806.16	SPDYA
ENSG00000163807.6	KIAA1143
ENSG00000163848.20	ZNF148
ENSG00000163875.16	MEAF6
ENSG00000163904.13	SENP2
ENSG00000163960.12	UBXN7
ENSG00000163975.12	MELTF
ENSG00000164023.14	SGMS2
ENSG00000164032.12	H2AZ1
ENSG00000164037.17	SLC9B1
ENSG00000164040.18	PGRMC2
ENSG00000164070.12	HSPA4L
ENSG00000164081.13	TEX264
ENSG00000164096.13	C4orf3
ENSG00000164104.12	HMGB2
ENSG00000164109.14	MAD2L1
ENSG00000164114.19	MAP9
ENSG00000164134.13	NAA15
ENSG00000164151.12	ICE1
ENSG00000164162.14	ANAPC10
ENSG00000164163.11	ABCE1
ENSG00000164164.17	OTUD4
ENSG00000164168.8	TMEM184C
ENSG00000164176.13	EDIL3
ENSG00000164181.14	ELOVL7
ENSG00000164209.17	SLC25A46
ENSG00000164244.21	PRRC1
ENSG00000164252.13	AGGF1
ENSG00000164284.15	GRPEL2
ENSG00000164292.13	RHOBTB3
ENSG00000164294.14	GPX8
ENSG00000164307.13	ERAP1
ENSG00000164323.14	CFAP97
ENSG00000164346.10	NSA2
ENSG00000164411.12	GJB7
ENSG00000164442.10	CITED2
ENSG00000164465.19	DCBLD1
ENSG00000164466.13	SFXN1
ENSG00000164535.15	DAGLB
ENSG00000164609.10	SLU7
ENSG00000164631.19	ZNF12
ENSG00000164649.20	CDCA7L
ENSG00000164684.13	ZNF704
ENSG00000164741.15	DLC1
ENSG00000164754.15	RAD21
ENSG00000164808.17	SPIDR
ENSG00000164828.18	SUN1
ENSG00000164830.18	OXR1
ENSG00000164916.11	FOXK1
ENSG00000164924.18	YWHAZ
ENSG00000164975.15	SNAPC3
ENSG00000164985.15	PSIP1
ENSG00000165152.9	PGAP4
ENSG00000165156.15	ZHX1
ENSG00000165169.11	DYNLT3
ENSG00000165185.15	KIAA1958
ENSG00000165240.20	ATP7A
ENSG00000165280.17	VCP
ENSG00000165410.15	CFL2
ENSG00000165416.15	SUGT1
ENSG00000165417.12	GTF2A1
ENSG00000165476.14	REEP3
ENSG00000165480.16	SKA3
ENSG00000165527.7	ARF6
ENSG00000165572.8	KBTBD6
ENSG00000165609.13	NUDT5
ENSG00000165629.20	ATP5F1C
ENSG00000165637.13	VDAC2
ENSG00000165646.14	SLC18A2
ENSG00000165650.12	PDZD8
ENSG00000165671.21	NSD1
ENSG00000165672.7	PRDX3
ENSG00000165675.16	ENOX2
ENSG00000165678.21	GHITM
ENSG00000165704.15	HPRT1
ENSG00000165732.13	DDX21
ENSG00000165757.9	JCAD
ENSG00000165832.6	TRUB1
ENSG00000165914.15	TTC7B
ENSG00000165934.13	CPSF2
ENSG00000165973.19	NELL1
ENSG00000165997.5	ARL5B
ENSG00000166002.7	SMCO4
ENSG00000166025.18	AMOTL1
ENSG00000166037.11	CEP57
ENSG00000166086.13	JAM3
ENSG00000166128.13	RAB8B
ENSG00000166164.16	BRD7
ENSG00000166170.10	BAG5
ENSG00000166181.13	API5
ENSG00000166197.17	NOLC1
ENSG00000166200.15	COPS2
ENSG00000166206.15	GABRB3
ENSG00000166224.17	SGPL1
ENSG00000166225.9	FRS2
ENSG00000166226.13	CCT2
ENSG00000166228.9	PCBD1
ENSG00000166260.13	COX11
ENSG00000166295.9	ANAPC16
ENSG00000166326.7	TRIM44
ENSG00000166340.17	TPP1
ENSG00000166402.9	TUB
ENSG00000166411.14	IDH3A
ENSG00000166454.10	ATMIN
ENSG00000166479.10	TMX3
ENSG00000166503.9	HDGFL3
ENSG00000166579.16	NDEL1
ENSG00000166598.15	HSP90B1
ENSG00000166710.21	B2M
ENSG00000166734.20	GOLM2
ENSG00000166747.13	AP1G1
ENSG00000166780.11	BMERB1
ENSG00000166794.5	PPIB
ENSG00000166797.11	CIAO2A
ENSG00000166845.15	C18orf54
ENSG00000166847.10	DCTN5
ENSG00000166881.10	NEMP1
ENSG00000166889.14	PATL1
ENSG00000166913.13	YWHAB
ENSG00000166938.13	DIS3L
ENSG00000166974.13	MAPRE2
ENSG00000167005.14	NUDT21
ENSG00000167081.18	PBX3
ENSG00000167088.11	SNRPD1
ENSG00000167193.8	CRK
ENSG00000167220.12	HDHD2
ENSG00000167258.15	CDK12
ENSG00000167315.18	ACAA2
ENSG00000167325.15	RRM1
ENSG00000167460.17	TPM4
ENSG00000167461.12	RAB8A
ENSG00000167552.14	TUBA1A
ENSG00000167553.16	TUBA1C
ENSG00000167635.12	ZNF146
ENSG00000167658.16	EEF2
ENSG00000167720.13	SRR
ENSG00000167721.11	TSR1
ENSG00000167842.16	MIS12
ENSG00000167978.17	SRRM2
ENSG00000167995.17	BEST1
ENSG00000167996.16	FTH1
ENSG00000168028.14	RPSA
ENSG00000168066.20	SF1
ENSG00000168092.14	PAFAH1B2
ENSG00000168118.12	RAB4A
ENSG00000168137.18	SETD5
ENSG00000168175.15	MAPK1IP1L
ENSG00000168214.20	RBPJ
ENSG00000168246.6	UBTD2
ENSG00000168264.10	IRF2BP2
ENSG00000168282.6	MGAT2
ENSG00000168283.14	BMI1
ENSG00000168303.9	MPLKIP
ENSG00000168385.18	SEPTIN2
ENSG00000168461.13	RAB31
ENSG00000168488.18	ATXN2L
ENSG00000168710.18	AHCYL1
ENSG00000168813.17	ZNF507
ENSG00000168906.13	MAT2A
ENSG00000168958.20	MFF
ENSG00000169018.6	FEM1B
ENSG00000169032.10	MAP2K1
ENSG00000169045.17	HNRNPH1
ENSG00000169057.24	MECP2
ENSG00000169139.12	UBE2V2
ENSG00000169375.16	SIN3A
ENSG00000169439.12	SDC2
ENSG00000169446.5	MMGT1
ENSG00000169504.15	CLIC4
ENSG00000169564.7	PCBP1
ENSG00000169567.13	HINT1
ENSG00000169570.10	DTWD2
ENSG00000169607.13	CKAP2L
ENSG00000169714.17	CNBP
ENSG00000169756.16	LIMS1
ENSG00000169813.16	HNRNPF
ENSG00000169851.15	PCDH7
ENSG00000169860.7	P2RY1
ENSG00000169895.6	SYAP1
ENSG00000169905.13	TOR1AIP2
ENSG00000169918.10	OTUD7A
ENSG00000169925.17	BRD3
ENSG00000169967.16	MAP3K2
ENSG00000170027.7	YWHAG
ENSG00000170035.16	UBE2E3
ENSG00000170113.16	NIPA1
ENSG00000170142.12	UBE2E1
ENSG00000170144.21	HNRNPA3
ENSG00000170153.11	RNF150
ENSG00000170275.15	CRTAP
ENSG00000170289.12	CNGB3
ENSG00000170312.16	CDK1
ENSG00000170348.9	TMED10
ENSG00000170365.10	SMAD1
ENSG00000170385.10	SLC30A1
ENSG00000170396.9	ZNF804A
ENSG00000170456.16	DENND5B
ENSG00000170482.17	SLC23A1
ENSG00000170500.13	LONRF2
ENSG00000170515.14	PA2G4
ENSG00000170540.15	ARL6IP1
ENSG00000170558.10	CDH2
ENSG00000170571.12	EMB
ENSG00000170632.14	ARMC10
ENSG00000170633.16	RNF34
ENSG00000170689.10	HOXB9
ENSG00000170759.11	KIF5B
ENSG00000170802.16	FOXN2
ENSG00000170860.4	LSM3
ENSG00000170921.15	TANC2
ENSG00000171004.18	HS6ST2
ENSG00000171055.15	FEZ2
ENSG00000171121.16	KCNMB3
ENSG00000171208.10	NETO2
ENSG00000171241.9	SHCBP1
ENSG00000171246.6	NPTX1
ENSG00000171262.11	FAM98B
ENSG00000171314.9	PGAM1
ENSG00000171316.12	CHD7
ENSG00000171444.18	MCC
ENSG00000171475.14	WIPF2
ENSG00000171488.15	LRRC8C
ENSG00000171492.14	LRRC8D
ENSG00000171603.18	CLSTN1
ENSG00000171634.18	BPTF
[truncated: 717 more rows]

## Sheet: Conway et al. 2016
#hESCs, eCLIP, Conway et al. 2016
ENSEMBL	SYMBOL
ENSG00000129038	LOXL1
ENSG00000105245	NUMBL
ENSG00000075790	BCAP29
ENSG00000075790	DUS4L-BCAP29
ENSG00000077274	CAPN6
ENSG00000237172	B3GNT9
ENSG00000115170	ACVR1
ENSG00000075426	FOSL2
ENSG00000198768	APCDD1L
ENSG00000082397	EPB41L3
ENSG00000077279	DCX
ENSG00000205336	ADGRG1
ENSG00000086232	EIF2AK1
ENSG00000074410	CA12
ENSG00000106688	SLC1A1
ENSG00000185070	FLRT2
ENSG00000106105	GARS1
ENSG00000105976	MET
ENSG00000184185	KCNJ12
ENSG00000165194	PCDH19
ENSG00000103647	CORO2B
ENSG00000186063	AIDA
ENSG00000066583	ISOC1
ENSG00000214517	PPME1
ENSG00000149131	SERPING1
ENSG00000139579	NABP2
ENSG00000076513	ANKRD13A
ENSG00000150594	ADRA2A
ENSG00000149679	CABLES2
ENSG00000159346	ADIPOR1
ENSG00000109689	STIM2
ENSG00000250317	SMIM20
ENSG00000170542	SERPINB9
ENSG00000101825	MXRA5
ENSG00000176087	SLC35A4
ENSG00000086189	DIMT1
ENSG00000145623	OSMR
ENSG00000179855	GIPC3
ENSG00000101084	RAB5IF
ENSG00000165757	JCAD
ENSG00000172780	RAB43
ENSG00000166482	MFAP4
ENSG00000157613	CREB3L1
ENSG00000136021	SCYL2
ENSG00000119408	NEK6
ENSG00000198624	CCDC69
ENSG00000212747	RTL8B
ENSG00000162819	BROX
ENSG00000185000	DGAT1
ENSG00000244005	NFS1
ENSG00000003249	DBNDD1
ENSG00000170382	LRRN2
ENSG00000115507	OTX1
ENSG00000104695	PPP2CB
ENSG00000115468	EFHD1
ENSG00000084676	NCOA1
ENSG00000198455	ZXDB
ENSG00000101158	NELFCD
ENSG00000130635	COL5A1
ENSG00000102271	KLHL4
ENSG00000120645	IQSEC3
ENSG00000040608	RTN4R
ENSG00000057294	PKP2
ENSG00000171067	C11orf24
ENSG00000166394	CYB5R2
ENSG00000104833	TUBB4A
ENSG00000148572	NRBF2
ENSG00000172269	DPAGT1
ENSG00000110104	CCDC86
ENSG00000155961	RAB39B
ENSG00000183580	FBXL7
ENSG00000116106	EPHA4
ENSG00000168671	UGT3A2
ENSG00000084731	KIF3C
ENSG00000116962	NID1
ENSG00000101846	STS
ENSG00000078053	AMPH
ENSG00000129757	CDKN1C
ENSG00000140557	ST8SIA2
ENSG00000148798	INA
ENSG00000134590	RTL8C
ENSG00000116604	MEF2D
ENSG00000253873	PCDHGA11
ENSG00000119777	TMEM214
ENSG00000113273	ARSB
ENSG00000172059	KLF11
ENSG00000104472	CHRAC1
ENSG00000162434	JAK1
ENSG00000167565	SERTAD3
ENSG00000070886	EPHA8
ENSG00000101343	CRNKL1
ENSG00000008056	SYN1
ENSG00000124507	PACSIN1
ENSG00000111145	ELK3
ENSG00000182168	UNC5C
ENSG00000119977	TCTN3
ENSG00000156298	TSPAN7
ENSG00000215114	UBXN2B
ENSG00000106692	FKTN
ENSG00000172081	MOB3A
ENSG00000154721	JAM2
ENSG00000165512	ZNF22
ENSG00000052795	FNIP2
ENSG00000143476	DTL
ENSG00000115414	FN1
ENSG00000105270	CLIP3
ENSG00000073711	PPP2R3A
ENSG00000151176	PLBD2
ENSG00000093072	ADA2
ENSG00000073150	PANX2
ENSG00000156711	MAPK13
ENSG00000156973	PDE6D
ENSG00000186806	VSIG10L
ENSG00000152092	ASTN1
ENSG00000163686	ABHD6
ENSG00000128656	CHN1
ENSG00000088808	PPP1R13B
ENSG00000145354	CISD2
ENSG00000172348	RCAN2
ENSG00000171724	VAT1L
ENSG00000167461	RAB8A
ENSG00000125648	SLC25A23
ENSG00000075290	WNT8B
ENSG00000128050	PAICS
ENSG00000024422	EHD2
ENSG00000242265	PEG10
ENSG00000081177	EXD2
ENSG00000150867	PIP4K2A
ENSG00000182934	SRPRA
ENSG00000063601	MTMR1
ENSG00000168016	TRANK1
ENSG00000157570	TSPAN18
ENSG00000180398	MCFD2
ENSG00000066027	PPP2R5A
ENSG00000153904	DDAH1
ENSG00000135837	CEP350
ENSG00000113140	SPARC
ENSG00000087053	MTMR2
ENSG00000150712	MTMR12
ENSG00000175376	EIF1AD
ENSG00000135272	MDFIC
ENSG00000111412	SPRING1
ENSG00000171208	NETO2
ENSG00000188643	S100A16
ENSG00000128463	EMC4
ENSG00000115935	WIPF1
ENSG00000017797	RALBP1
ENSG00000067992	PDK3
ENSG00000152932	RAB3C
ENSG00000183098	GPC6
ENSG00000082213	C5orf22
ENSG00000089159	PXN
ENSG00000109686	SH3D19
ENSG00000196338	NLGN3
ENSG00000158483	FAM86C1P
ENSG00000143418	CERS2
ENSG00000102302	FGD1
ENSG00000137312	FLOT1
ENSG00000182022	CHST15
ENSG00000138463	SLC49A4
ENSG00000184900	SUMO3
ENSG00000198860	TSEN15
ENSG00000085644	ZNF213
ENSG00000175470	PPP2R2D
ENSG00000102580	DNAJC3
ENSG00000103855	CD276
ENSG00000137822	TUBGCP4
ENSG00000104979	C19orf53
ENSG00000118894	EEF2KMT
ENSG00000256463	SALL3
ENSG00000006695	COX10
ENSG00000067715	SYT1
ENSG00000182195	LDOC1
ENSG00000158258	CLSTN2
ENSG00000136379	ABHD17C
ENSG00000108829	LRRC59
ENSG00000187446	CHP1
ENSG00000170915	PAQR8
ENSG00000173065	FAM222B
ENSG00000183726	TMEM50A
ENSG00000065675	PRKCQ
ENSG00000046604	DSG2
ENSG00000118257	NRP2
ENSG00000203950	RTL8A
ENSG00000164414	SLC35A1
ENSG00000182795	C1orf116
ENSG00000162551	ALPL
ENSG00000185630	PBX1
ENSG00000182492	BGN
ENSG00000163637	PRICKLE2
ENSG00000168734	PKIG
ENSG00000173456	RNF26
ENSG00000169760	NLGN1
ENSG00000140443	IGF1R
ENSG00000167658	EEF2
ENSG00000124767	GLO1
ENSG00000113194	FAF2
ENSG00000108679	LGALS3BP
ENSG00000078295	ADCY2
ENSG00000213694	S1PR3
ENSG00000213694	C9orf47
ENSG00000106537	TSPAN13
ENSG00000108175	ZMIZ1
ENSG00000185155	MIXL1
ENSG00000160767	FAM189B
ENSG00000121644	DESI2
ENSG00000133895	MEN1
ENSG00000183287	CCBE1
ENSG00000143341	HMCN1
ENSG00000198805	PNP
ENSG00000155463	OXA1L
ENSG00000076201	PTPN23
ENSG00000139219	COL2A1
ENSG00000108582	CPD
ENSG00000092068	SLC7A8
ENSG00000075568	TMEM131
ENSG00000172765	TMCC1
ENSG00000133065	SLC41A1
ENSG00000103353	UBFD1
ENSG00000112902	SEMA5A
ENSG00000186469	GNG2
ENSG00000102882	MAPK3
ENSG00000204310	AGPAT1
ENSG00000062485	CS
ENSG00000092201	SUPT16H
ENSG00000146411	SLC2A12
ENSG00000141219	C17orf80
ENSG00000066629	EML1
ENSG00000143436	MRPL9
ENSG00000188803	SHISA6
ENSG00000137404	NRM
ENSG00000235750	KIAA0040
ENSG00000172954	LCLAT1
ENSG00000155592	ZKSCAN2
ENSG00000211445	GPX3
ENSG00000147100	SLC16A2
ENSG00000137843	PAK6
ENSG00000137843	BUB1B-PAK6
ENSG00000178719	GRINA
ENSG00000088367	EPB41L1
ENSG00000198369	SPRED2
ENSG00000171634	BPTF
ENSG00000103042	SLC38A7
ENSG00000129562	DAD1
ENSG00000129244	ATP1B2
ENSG00000102931	ARL2BP
ENSG00000163814	CDCP1
ENSG00000087258	GNAO1
ENSG00000102409	BEX4
ENSG00000241468	ATP5MF
ENSG00000169604	ANTXR1
ENSG00000132471	WBP2
ENSG00000139209	SLC38A4
ENSG00000107566	ERLIN1
ENSG00000170921	TANC2
ENSG00000174780	SRP72
ENSG00000033327	GAB2
ENSG00000149260	CAPN5
ENSG00000149547	EI24
ENSG00000152377	SPOCK1
ENSG00000149948	HMGA2
ENSG00000072110	ACTN1
ENSG00000197496	SLC2A10
ENSG00000119396	RAB14
ENSG00000184005	ST6GALNAC3
ENSG00000110987	BCL7A
ENSG00000106635	BCL7B
ENSG00000177879	AP3S1
ENSG00000141376	BCAS3
ENSG00000185127	C6orf120
ENSG00000135083	CCNJL
ENSG00000131462	TUBG1
ENSG00000115902	SLC1A4
ENSG00000205765	C5orf51
ENSG00000136925	TSTD2
ENSG00000130165	ELOF1
ENSG00000073464	CLCN4
ENSG00000090487	SPG21
ENSG00000004142	POLDIP2
ENSG00000131236	CAP1
ENSG00000060718	COL11A1
ENSG00000182752	PAPPA
ENSG00000126003	PLAGL2
ENSG00000065308	TRAM2
ENSG00000172830	SSH3
ENSG00000153721	CNKSR3
ENSG00000143324	XPR1
ENSG00000159167	STC1
ENSG00000165449	SLC16A9
ENSG00000244509	APOBEC3C
ENSG00000048740	CELF2
ENSG00000248098	BCKDHA
ENSG00000151892	GFRA1
ENSG00000196376	SLC35F1
ENSG00000234127	TRIM26
ENSG00000035862	TIMP2
ENSG00000139514	SLC7A1
ENSG00000160208	RRP1B
ENSG00000172936	MYD88
ENSG00000133884	DPF2
ENSG00000204673	AKT1S1
ENSG00000086848	ALG9
ENSG00000172986	GXYLT2
ENSG00000185090	MANEAL
ENSG00000107798	LIPA
ENSG00000158445	KCNB1
ENSG00000152137	HSPB8
ENSG00000142156	COL6A1
ENSG00000180530	NRIP1
ENSG00000104812	GYS1
ENSG00000155016	CYP2U1
ENSG00000110400	NECTIN1
ENSG00000105887	MTPN
ENSG00000105887	LUZP6
ENSG00000113732	ATP6V0E1
ENSG00000166831	RBPMS2
ENSG00000196743	GM2A
ENSG00000108774	RAB5C
ENSG00000090020	SLC9A1
ENSG00000092421	SEMA6A
ENSG00000113361	CDH6
ENSG00000111249	CUX2
ENSG00000158156	XKR8
ENSG00000055163	CYFIP2
ENSG00000161847	RAVER1
ENSG00000166974	MAPRE2
ENSG00000137266	SLC22A23
ENSG00000138760	SCARB2
ENSG00000110108	TMEM109
ENSG00000099246	RAB18
ENSG00000206527	HACD2
ENSG00000100077	GRK3
ENSG00000101856	PGRMC1
ENSG00000090924	PLEKHG2
ENSG00000084090	STARD7
ENSG00000188042	ARL4C
ENSG00000239264	TXNDC5
ENSG00000131016	AKAP12
ENSG00000099204	ABLIM1
ENSG00000144668	ITGA9
ENSG00000112182	BACH2
ENSG00000159658	EFCAB14
ENSG00000138674	SEC31A
ENSG00000184371	CSF1
ENSG00000272333	KMT2B
ENSG00000010810	FYN
ENSG00000146112	PPP1R18
ENSG00000146112	LOC107987457
ENSG00000080815	PSEN1
ENSG00000123191	ATP7B
ENSG00000130226	DPP6
ENSG00000122966	CIT
ENSG00000182263	FIGN
ENSG00000171055	FEZ2
ENSG00000081692	JMJD4
ENSG00000137309	HMGA1
ENSG00000103005	USB1
ENSG00000073849	ST6GAL1
ENSG00000147065	MSN
ENSG00000090061	CCNK
ENSG00000167601	AXL
ENSG00000197930	ERO1A
ENSG00000007062	PROM1
ENSG00000111110	PPM1H
ENSG00000118922	KLF12
ENSG00000124208	PEDS1-UBE2V1
ENSG00000244687	UBE2V1
ENSG00000137845	ADAM10
ENSG00000022267	FHL1
ENSG00000146729	NIPSNAP2
ENSG00000104765	BNIP3L
ENSG00000136295	TTYH3
ENSG00000187664	HAPLN4
ENSG00000196227	FAM217B
ENSG00000007314	SCN4A
ENSG00000186918	ZNF395
ENSG00000253313	C1orf210
ENSG00000101608	MYL12A
ENSG00000172164	SNTB1
ENSG00000155849	ELMO1
ENSG00000213949	ITGA1
ENSG00000161654	LSM12
ENSG00000198948	MFAP3L
ENSG00000137815	RTF1
ENSG00000176542	USF3
ENSG00000163104	SMARCAD1
ENSG00000157933	SKI
ENSG00000155304	HSPA13
ENSG00000110047	EHD1
ENSG00000143858	SYT2
ENSG00000099864	PALM
ENSG00000072571	HMMR
ENSG00000133812	SBF2
ENSG00000116237	ICMT
ENSG00000124098	FAM210B
ENSG00000162493	PDPN
ENSG00000170464	DNAJC18
ENSG00000176788	BASP1
ENSG00000163430	FSTL1
ENSG00000102053	ZC3H12B
ENSG00000134215	VAV3
ENSG00000152818	UTRN
ENSG00000178974	FBXO34
ENSG00000033170	FUT8
ENSG00000136044	APPL2
ENSG00000079739	PGM1
ENSG00000090530	P3H2
ENSG00000105131	EPHX3
ENSG00000169184	MN1
ENSG00000068878	PSME4
ENSG00000172380	GNG12
ENSG00000138758	SEPTIN11
ENSG00000116128	BCL9
ENSG00000109519	GRPEL1
ENSG00000147027	TMEM47
ENSG00000111142	METAP2
ENSG00000182108	DEXI
ENSG00000070761	CFAP20
ENSG00000135622	SEMA4F
ENSG00000163235	TGFA
ENSG00000166411	IDH3A
ENSG00000128610	FEZF1
ENSG00000179761	PIPOX
ENSG00000171649	ZIK1
ENSG00000130558	OLFM1
ENSG00000174238	PITPNA
ENSG00000100554	ATP6V1D
ENSG00000120805	ARL1
ENSG00000115365	LANCL1
ENSG00000151914	DST
ENSG00000115526	CHST10
ENSG00000186638	KIF24
ENSG00000100350	FOXRED2
ENSG00000105939	ZC3HAV1
ENSG00000103148	NPRL3
ENSG00000088756	ARHGAP28
ENSG00000240849	PEDS1
ENSG00000115159	GPD2
ENSG00000103260	METRN
ENSG00000146072	TNFRSF21
ENSG00000174705	SH3PXD2B
ENSG00000138757	G3BP2
ENSG00000213281	NRAS
ENSG00000148110	MFSD14B
ENSG00000113384	GOLPH3
ENSG00000160783	PMF1
ENSG00000143079	CTTNBP2NL
ENSG00000120742	SERP1
ENSG00000140382	HMG20A
ENSG00000136854	STXBP1
ENSG00000150510	FAM124A
ENSG00000170348	TMED10
ENSG00000163513	TGFBR2
ENSG00000166002	SMCO4
ENSG00000129595	EPB41L4A
ENSG00000153317	ASAP1
ENSG00000152939	MARVELD2
ENSG00000106415	GLCCI1
ENSG00000105866	SP4
ENSG00000168785	TSPAN5
ENSG00000160746	ANO10
ENSG00000131711	MAP1B
ENSG00000182636	NDN
ENSG00000100129	EIF3L
ENSG00000198538	ZNF28
ENSG00000074657	ZNF532
ENSG00000099617	EFNA2
ENSG00000187498	COL4A1
ENSG00000003436	TFPI
ENSG00000144278	GALNT13
ENSG00000148672	GLUD1
ENSG00000103512	NOMO1
ENSG00000131238	PPT1
ENSG00000161642	ZNF385A
ENSG00000113594	LIFR
ENSG00000005339	CREBBP
ENSG00000101337	TM9SF4
ENSG00000101367	MAPRE1
ENSG00000174938	SEZ6L2
ENSG00000110148	CCKBR
ENSG00000162433	AK4
ENSG00000173230	GOLGB1
ENSG00000156299	TIAM1
ENSG00000116729	WLS
ENSG00000170043	TRAPPC1
ENSG00000182240	BACE2
ENSG00000131459	GFPT2
ENSG00000254858	MPV17L2
ENSG00000029725	RABEP1
ENSG00000106772	PRUNE2
ENSG00000180543	TSPYL5
ENSG00000186184	POLR1D
ENSG00000074695	LMAN1
ENSG00000064393	HIPK2
ENSG00000130147	SH3BP4
ENSG00000136816	TOR1B
ENSG00000152495	CAMK4
ENSG00000143126	CELSR2
ENSG00000087586	AURKA
ENSG00000178202	POGLUT3
ENSG00000166228	PCBD1
ENSG00000080822	CLDND1
ENSG00000125651	GTF2F1
ENSG00000168802	CHTF8
ENSG00000168802	DERPC
ENSG00000167323	STIM1
ENSG00000166833	NAV2
ENSG00000162704	ARPC5
ENSG00000198855	FICD
ENSG00000132964	CDK8
ENSG00000111266	DUSP16
ENSG00000240344	PPIL3
ENSG00000183908	LRRC55
ENSG00000115350	POLE4
ENSG00000103449	SALL1
ENSG00000134954	ETS1
ENSG00000154945	ANKRD40
ENSG00000162924	REL
ENSG00000186260	MRTFB
ENSG00000144677	CTDSPL
ENSG00000132932	ATP8A2
ENSG00000178209	PLEC
ENSG00000255302	EID1
ENSG00000075213	SEMA3A
ENSG00000116350	SRSF4
ENSG00000120549	KIAA1217
ENSG00000164168	TMEM184C
ENSG00000124406	ATP8A1
ENSG00000168243	GNG4
ENSG00000158470	B4GALT5
ENSG00000100439	ABHD4
ENSG00000135643	KCNMB4
ENSG00000007402	CACNA2D2
ENSG00000139644	TMBIM6
ENSG00000113441	LNPEP
ENSG00000198876	DCAF12
ENSG00000182534	MXRA7
ENSG00000153561	RMND5A
ENSG00000198825	INPP5F
ENSG00000091409	ITGA6
ENSG00000009844	VTA1
ENSG00000182481	KPNA2
ENSG00000165061	ZMAT4
ENSG00000134265	NAPG
ENSG00000153767	GTF2E1
ENSG00000138336	TET1
ENSG00000067113	PLPP1
ENSG00000076554	TPD52
ENSG00000186073	CDIN1
ENSG00000151693	ASAP2
ENSG00000140262	TCF12
ENSG00000066322	ELOVL1
ENSG00000137574	TGS1
ENSG00000134107	BHLHE40
ENSG00000120162	MOB3B
ENSG00000197147	LRRC8B
ENSG00000183255	PTTG1IP
ENSG00000106070	GRB10
ENSG00000124496	TRERF1
ENSG00000189067	LITAF
ENSG00000141429	GALNT1
ENSG00000090857	PDPR
ENSG00000113048	MRPS27
ENSG00000055130	CUL1
ENSG00000055208	TAB2
ENSG00000106290	TAF6
ENSG00000136986	DERL1
ENSG00000152291	TGOLN2
ENSG00000186298	PPP1CC
ENSG00000124275	MTRR
ENSG00000139910	NOVA1
ENSG00000124177	CHD6
ENSG00000158850	B4GALT3
ENSG00000163888	CAMK2N2
ENSG00000139112	GABARAPL1
ENSG00000198663	C6orf89
ENSG00000085719	CPNE3
ENSG00000105220	GPI
ENSG00000120594	PLXDC2
ENSG00000139083	ETV6
ENSG00000173218	VANGL1
ENSG00000224470	ATXN1L
ENSG00000103035	PSMD7
ENSG00000167397	VKORC1
ENSG00000144647	POMGNT2
ENSG00000138592	USP8
ENSG00000111319	SCNN1A
ENSG00000185585	OLFML2A
ENSG00000132002	DNAJB1
ENSG00000261115	TMEM178B
ENSG00000198176	TFDP1
ENSG00000113575	PPP2CA
ENSG00000066468	FGFR2
ENSG00000078018	MAP2
ENSG00000058668	ATP2B4
ENSG00000073969	NSF
ENSG00000157514	TSC22D3
ENSG00000136715	SAP130
ENSG00000125257	ABCC4
ENSG00000205060	SLC35B4
ENSG00000132846	ZBED3
ENSG00000141985	SH3GL1
ENSG00000108395	TRIM37
ENSG00000130827	PLXNA3
ENSG00000116133	DHCR24
ENSG00000197183	NOL4L
ENSG00000185651	UBE2L3
ENSG00000150457	LATS2
ENSG00000089737	DDX24
ENSG00000108091	CCDC6
ENSG00000176387	HSD11B2
ENSG00000185591	SP1
ENSG00000110925	CSRNP2
ENSG00000120063	GNA13
ENSG00000112305	SMAP1
ENSG00000158321	AUTS2
ENSG00000117862	TXNDC12
ENSG00000073792	IGF2BP2
ENSG00000106236	NPTX2
ENSG00000113719	ERGIC1
ENSG00000124160	NCOA5
ENSG00000169855	ROBO1
ENSG00000180901	KCTD2
ENSG00000146938	NLGN4X
ENSG00000198756	COLGALT2
ENSG00000167182	SP2
ENSG00000112559	MDFI
ENSG00000165895	ARHGAP42
ENSG00000165716	DIPK1B
ENSG00000179627	ZBTB42
ENSG00000198890	PRMT6
ENSG00000101363	MANBAL
ENSG00000171867	PRNP
ENSG00000117859	OSBPL9
ENSG00000099994	SUSD2
ENSG00000132164	SLC6A11
ENSG00000106665	CLIP2
ENSG00000114742	WDR48
ENSG00000133943	DGLUCY
ENSG00000069869	NEDD4
ENSG00000107438	PDLIM1
ENSG00000255529	POLR2M
ENSG00000142082	SIRT3
ENSG00000118200	CAMSAP2
ENSG00000033800	PIAS1
ENSG00000123892	RAB38
ENSG00000145626	UGT3A1
ENSG00000136738	STAM
ENSG00000140575	IQGAP1
ENSG00000115806	GORASP2
ENSG00000196182	STK40
ENSG00000137166	FOXP4
ENSG00000120705	ETF1
ENSG00000069275	NUCKS1
ENSG00000111252	SH2B3
ENSG00000163697	APBB2
ENSG00000084733	RAB10
ENSG00000066117	SMARCD1
ENSG00000148773	MKI67
ENSG00000179361	ARID3B
ENSG00000147533	GOLGA7
ENSG00000175727	MLXIP
ENSG00000144840	RABL3
ENSG00000107771	CCSER2
ENSG00000175220	ARHGAP1
ENSG00000147676	MAL2
ENSG00000169116	PARM1
ENSG00000169635	HIC2
ENSG00000133026	MYH10
ENSG00000160131	VMA21
ENSG00000154118	JPH3
ENSG00000111328	CDK2AP1
ENSG00000187514	PTMA
ENSG00000117682	DHDDS
ENSG00000104332	SFRP1
ENSG00000138074	SLC5A6
ENSG00000113522	RAD50
ENSG00000162402	USP24
ENSG00000197006	METTL9
ENSG00000173402	DAG1
ENSG00000078114	NEBL
ENSG00000254999	BRK1
ENSG00000169641	LUZP1
ENSG00000136010	ALDH1L2
ENSG00000141905	NFIC
ENSG00000136045	PWP1
ENSG00000168615	ADAM9
ENSG00000100604	CHGA
ENSG00000050130	JKAMP
ENSG00000180447	GAS1
ENSG00000102753	KPNA3
ENSG00000116489	CAPZA1
ENSG00000063978	RNF4
ENSG00000065491	TBC1D22B
ENSG00000250021	ARPIN-AP3S2
ENSG00000087245	MMP2
ENSG00000154639	CXADR
ENSG00000177108	ZDHHC22
ENSG00000100938	GMPR2
ENSG00000095015	MAP3K1
ENSG00000115652	UXS1
ENSG00000184047	DIABLO
ENSG00000141639	MAPK4
ENSG00000140740	UQCRC2
ENSG00000164307	ERAP1
ENSG00000156273	BACH1
ENSG00000156273	GRIK1-AS2
ENSG00000172292	CERS6
ENSG00000130821	SLC6A8
ENSG00000063587	ZNF275
ENSG00000063587	LOC105373378
ENSG00000086712	TXLNG
ENSG00000124198	ARFGEF2
ENSG00000159322	ADPGK
ENSG00000122778	KIAA1549
ENSG00000132970	WASF3
ENSG00000104388	RAB2A
ENSG00000171792	RHNO1
ENSG00000145996	CDKAL1
ENSG00000110436	SLC1A2
ENSG00000095261	PSMD5
ENSG00000156587	UBE2L6
ENSG00000140718	FTO
ENSG00000115266	APC2
ENSG00000153707	PTPRD
ENSG00000166860	ZBTB39
ENSG00000167081	PBX3
ENSG00000145386	CCNA2
ENSG00000135862	LAMC1
ENSG00000153786	ZDHHC7
ENSG00000213190	MLLT11
ENSG00000119318	RAD23B
ENSG00000166579	NDEL1
ENSG00000117394	SLC2A1
ENSG00000198951	NAGA
ENSG00000181588	MEX3D
ENSG00000173334	TRIB1
ENSG00000108788	MLX
ENSG00000175785	PRIMA1
ENSG00000167460	TPM4
ENSG00000119285	HEATR1
ENSG00000230989	HSBP1
ENSG00000147140	NONO
ENSG00000169446	MMGT1
ENSG00000125841	NRSN2
ENSG00000137478	FCHSD2
ENSG00000105552	BCAT2
ENSG00000156642	NPTN
ENSG00000138303	ASCC1
ENSG00000108821	COL1A1
ENSG00000183454	GRIN2A
ENSG00000142875	PRKACB
ENSG00000166167	BTRC
ENSG00000150893	FREM2
ENSG00000141576	RNF157
ENSG00000106609	TMEM248
ENSG00000162407	PLPP3
ENSG00000119280	C1orf198
ENSG00000008294	SPAG9
ENSG00000115884	SDC1
ENSG00000173327	MAP3K11
ENSG00000166128	RAB8B
ENSG00000137710	RDX
ENSG00000177119	ANO6
ENSG00000089472	HEPH
ENSG00000146425	DYNLT1
ENSG00000110660	SLC35F2
ENSG00000144468	RHBDD1
ENSG00000152558	TMEM123
ENSG00000013523	ANGEL1
ENSG00000011454	RABGAP1
ENSG00000104112	SCG3
ENSG00000106571	GLI3
ENSG00000135108	FBXO21
ENSG00000120885	CLU
ENSG00000188706	ZDHHC9
ENSG00000125977	EIF2S2
ENSG00000154767	XPC
ENSG00000117115	PADI2
ENSG00000120533	ENY2
ENSG00000136938	ANP32B
ENSG00000170537	TMC7
ENSG00000070614	NDST1
ENSG00000154277	UCHL1
ENSG00000127022	CANX
ENSG00000131724	IL13RA1
ENSG00000164040	PGRMC2
ENSG00000104635	SLC39A14
ENSG00000109084	TMEM97
ENSG00000187325	TAF9B
ENSG00000100219	XBP1
ENSG00000167889	MGAT5B
ENSG00000197563	PIGN
ENSG00000137073	UBAP2
ENSG00000197694	SPTAN1
ENSG00000166987	MBD6
ENSG00000204371	EHMT2
ENSG00000006125	AP2B1
ENSG00000143549	TPM3
ENSG00000147419	CCDC25
ENSG00000196189	SEMA4A
ENSG00000100625	SIX4
ENSG00000057663	ATG5
ENSG00000105879	CBLL1
ENSG00000143641	GALNT2
ENSG00000145423	SFRP2
ENSG00000078124	ACER3
ENSG00000144369	FAM171B
ENSG00000103194	USP10
ENSG00000171603	CLSTN1
ENSG00000197555	SIPA1L1
ENSG00000162368	CMPK1
ENSG00000165905	LARGE2
ENSG00000186480	INSIG1
ENSG00000049245	VAMP3
ENSG00000197226	TBC1D9B
ENSG00000146007	ZMAT2
ENSG00000123908	AGO2
ENSG00000129625	REEP5
ENSG00000166747	AP1G1
ENSG00000065526	SPEN
ENSG00000021300	PLEKHB1
ENSG00000000003	TSPAN6
ENSG00000077232	DNAJC10
ENSG00000132274	TRIM22
ENSG00000138829	FBN2
ENSG00000100221	JOSD1
ENSG00000152518	ZFP36L2
ENSG00000125484	GTF3C4
ENSG00000102230	PCYT1B
ENSG00000143162	CREG1
ENSG00000136824	SMC2
ENSG00000007237	GAS7
ENSG00000173281	PPP1R3B
ENSG00000115207	GTF3C2
ENSG00000124783	SSR1
ENSG00000119314	PTBP3
ENSG00000148600	CDHR1
ENSG00000187605	TET3
ENSG00000164684	ZNF704
ENSG00000019582	CD74
ENSG00000147649	MTDH
ENSG00000158480	SPATA2
ENSG00000107669	ATE1
ENSG00000138166	DUSP5
ENSG00000105656	ELL
ENSG00000061337	LZTS1
ENSG00000188242	PP7080
ENSG00000107745	MICU1
ENSG00000258315	C17orf49
ENSG00000163032	VSNL1
ENSG00000171135	JAGN1
ENSG00000186566	GPATCH8
ENSG00000175595	ERCC4
ENSG00000115226	FNDC4
ENSG00000164251	F2RL1
ENSG00000100592	DAAM1
ENSG00000142599	RERE
ENSG00000120647	CCDC77
ENSG00000131323	TRAF3
ENSG00000110723	EXPH5
ENSG00000197702	PARVA
ENSG00000102189	EEA1
ENSG00000100139	MICALL1
ENSG00000145029	NICN1
ENSG00000164442	CITED2
ENSG00000116459	ATP5PB
ENSG00000188033	ZNF490
ENSG00000072501	SMC1A
ENSG00000114439	BBX
ENSG00000108852	MPP2
ENSG00000058063	ATP11B
ENSG00000160094	ZNF362
ENSG00000148985	PGAP2
ENSG00000104805	NUCB1
ENSG00000188848	BEND4
ENSG00000152284	TCF7L1
ENSG00000101439	CST3
ENSG00000178184	PARD6G
ENSG00000106460	TMEM106B
ENSG00000196230	TUBB
ENSG00000114850	SSR3
ENSG00000271303	SRXN1
ENSG00000102316	MAGED2
ENSG00000171617	ENC1
ENSG00000140750	ARHGAP17
ENSG00000088986	DYNLL1
ENSG00000177098	SCN4B
ENSG00000111961	SASH1
ENSG00000136238	RAC1
ENSG00000160360	GPSM1
ENSG00000113721	PDGFRB
ENSG00000139718	SETD1B
ENSG00000179912	R3HDM2
ENSG00000118898	PPL
ENSG00000156853	ZNF689
ENSG00000197045	GMFB
ENSG00000067167	TRAM1
ENSG00000170876	TMEM43
ENSG00000157823	AP3S2
ENSG00000187736	NHEJ1
ENSG00000150471	ADGRL3
ENSG00000106459	NRF1
ENSG00000125386	FAM193A
ENSG00000166197	NOLC1
ENSG00000132824	SERINC3
ENSG00000007168	PAFAH1B1
ENSG00000120071	KANSL1
ENSG00000109265	CRACD
ENSG00000259399	TGIF2-RAB5IF
ENSG00000143469	SYT14
ENSG00000111737	RAB35
ENSG00000172340	SUCLG2
ENSG00000109066	TMEM104
ENSG00000170296	GABARAP
ENSG00000198925	ATG9A
ENSG00000157404	KIT
ENSG00000101040	ZMYND8
ENSG00000134686	PHC2
ENSG00000091527	CDV3
ENSG00000138459	SLC35A5
ENSG00000244405	ETV5
ENSG00000124356	STAMBP
ENSG00000184408	KCND2
ENSG00000175348	TMEM9B
ENSG00000012963	UBR7
ENSG00000204574	ABCF1
ENSG00000132388	UBE2G1
ENSG00000173320	STOX2
ENSG00000164111	ANXA5
ENSG00000145675	PIK3R1
ENSG00000162344	FGF19
ENSG00000078668	VDAC3
ENSG00000196663	TECPR2
ENSG00000123560	PLP1
ENSG00000128245	YWHAH
ENSG00000103018	CYB5B
ENSG00000165997	ARL5B
ENSG00000099194	SCD
ENSG00000025293	PHF20
ENSG00000226479	TMEM185B
ENSG00000180964	TCEAL8
ENSG00000122756	CNTFR
ENSG00000090861	AARS1
ENSG00000154856	APCDD1
ENSG00000136492	BRIP1
ENSG00000079387	SENP1
ENSG00000148942	SLC5A12
ENSG00000135903	PAX3
ENSG00000103460	TOX3
ENSG00000198522	GPN1
ENSG00000177105	RHOG
ENSG00000117155	SSX2IP
ENSG00000138771	SHROOM3
ENSG00000116698	SMG7
ENSG00000204619	PPP1R11
ENSG00000218336	TENM3
ENSG00000171160	MORN4
ENSG00000082781	ITGB5
ENSG00000101421	CHMP4B
ENSG00000142453	CARM1
ENSG00000260903	XKR7
ENSG00000125827	TMX4
ENSG00000078369	GNB1
ENSG00000168175	MAPK1IP1L
ENSG00000115561	CHMP3
ENSG00000166250	CLMP
ENSG00000137819	PAQR5
ENSG00000185883	ATP6V0C
ENSG00000154310	TNIK
ENSG00000136908	DPM2
ENSG00000189043	NDUFA4
ENSG00000101311	FERMT1
ENSG00000152208	GRID2
ENSG00000185436	IFNLR1
ENSG00000088256	GNA11
ENSG00000253719	ATXN7L3B
ENSG00000141560	FN3KRP
ENSG00000100711	ZFYVE21
ENSG00000197535	MYO5A
ENSG00000090905	TNRC6A
ENSG00000117523	PRRC2C
ENSG00000171877	FRMD5
ENSG00000161958	FGF11
ENSG00000198053	SIRPA
ENSG00000164970	FAM219A
ENSG00000125430	HS3ST3B1
ENSG00000139921	TMX1
ENSG00000116273	PHF13
ENSG00000173473	SMARCC1
ENSG00000117222	RBBP5
ENSG00000163909	HEYL
ENSG00000073584	SMARCE1
ENSG00000119401	TRIM32
ENSG00000163659	TIPARP
ENSG00000170265	ZNF282
ENSG00000155876	RRAGA
ENSG00000160714	UBE2Q1
ENSG00000134490	TMEM241
ENSG00000166086	JAM3
ENSG00000175334	BANF1
ENSG00000178951	ZBTB7A
ENSG00000149269	PAK1
ENSG00000197312	DDI2
ENSG00000100413	POLR3H
ENSG00000144566	RAB5A
ENSG00000174607	UGT8
ENSG00000066654	THUMPD1
ENSG00000137804	NUSAP1
ENSG00000140577	CRTC3
ENSG00000139641	ESYT1
ENSG00000170653	ATF7
ENSG00000165152	PGAP4
ENSG00000167105	TMEM92
ENSG00000004864	SLC25A13
ENSG00000196581	AJAP1
ENSG00000156052	GNAQ
ENSG00000183166	CALN1
ENSG00000169783	LINGO1
ENSG00000177732	SOX12
ENSG00000198668	CALM1
ENSG00000092148	HECTD1
ENSG00000066136	NFYC
ENSG00000140406	TLNRD1
ENSG00000145819	ARHGAP26
ENSG00000103502	CDIPT
ENSG00000101868	POLA1
ENSG00000110218	PANX1
ENSG00000091640	SPAG7
ENSG00000078061	ARAF
ENSG00000144560	VGLL4
ENSG00000119414	PPP6C
ENSG00000134595	SOX3
ENSG00000137193	PIM1
ENSG00000129353	SLC44A2
ENSG00000072849	DERL2
ENSG00000170027	YWHAG
ENSG00000140548	ZNF710
ENSG00000122786	CALD1
ENSG00000118971	CCND2
ENSG00000151612	ZNF827
ENSG00000100281	HMGXB4
ENSG00000153814	JAZF1
ENSG00000124920	MYRF
ENSG00000103043	VAC14
ENSG00000170271	FAXDC2
ENSG00000132326	PER2
ENSG00000164068	RNF123
ENSG00000072401	UBE2D1
ENSG00000103528	SYT17
ENSG00000140307	GTF2A2
ENSG00000196371	FUT4
ENSG00000102978	POLR2C
ENSG00000064313	TAF2
ENSG00000174442	ZWILCH
ENSG00000147872	PLIN2
ENSG00000134717	BTF3L4
ENSG00000140836	ZFHX3
ENSG00000104660	LEPROTL1
ENSG00000157538	VPS26C
ENSG00000113552	GNPDA1
ENSG00000111775	COX6A1
ENSG00000156515	HK1
ENSG00000140564	FURIN
ENSG00000163412	EIF4E3
ENSG00000108389	MTMR4
ENSG00000156735	BAG4
ENSG00000100644	HIF1A
ENSG00000123416	TUBA1B
ENSG00000103489	XYLT1
ENSG00000163389	POGLUT1
ENSG00000142864	SERBP1
ENSG00000138083	SIX3
ENSG00000109458	GAB1
ENSG00000065809	FAM107B
ENSG00000130559	CAMSAP1
ENSG00000177614	PGBD5
ENSG00000185624	P4HB
ENSG00000123411	IKZF4
ENSG00000177697	CD151
ENSG00000124374	PAIP2B
ENSG00000169016	E2F6
ENSG00000185532	PRKG1
ENSG00000090975	PITPNM2
ENSG00000133789	SWAP70
ENSG00000105143	SLC1A6
ENSG00000197982	C1orf122
ENSG00000106785	TRIM14
ENSG00000198055	GRK6
ENSG00000079482	OPHN1
ENSG00000158987	RAPGEF6
ENSG00000109929	SC5D
ENSG00000144224	UBXN4
ENSG00000133818	RRAS2
ENSG00000131844	MCCC2
ENSG00000183864	TOB2
ENSG00000165732	DDX21
ENSG00000170242	USP47
ENSG00000163879	DNALI1
ENSG00000005249	PRKAR2B
ENSG00000108061	SHOC2
ENSG00000105849	POLR1F
ENSG00000090863	GLG1
ENSG00000123728	RAP2C
ENSG00000025772	TOMM34
ENSG00000128595	CALU
ENSG00000126698	DNAJC8
ENSG00000136367	ZFHX2
ENSG00000161939	RNASEK-C17orf49
ENSG00000054965	FAM168A
ENSG00000130054	FAM155B
ENSG00000158710	TAGLN2
ENSG00000166272	WBP1L
ENSG00000166272	CYP17A1-AS1
ENSG00000213977	TAX1BP3
ENSG00000133119	RFC3
ENSG00000185950	IRS2
ENSG00000198920	KIAA0753
ENSG00000116095	PLEKHA3
ENSG00000069424	KCNAB2
ENSG00000070366	SMG6
ENSG00000166900	STX3
ENSG00000087086	FTL
ENSG00000104442	ARMC1
ENSG00000010404	IDS
ENSG00000196730	DAPK1
ENSG00000176658	MYO1D
ENSG00000167395	ZNF646
ENSG00000100348	TXN2
ENSG00000198242	RPL23A
ENSG00000167770	OTUB1
ENSG00000060749	QSER1
ENSG00000164163	ABCE1
ENSG00000122203	KIAA1191
ENSG00000100243	CYB5R3
ENSG00000101057	MYBL2
ENSG00000196396	PTPN1
ENSG00000148468	FAM171A1
ENSG00000119402	FBXW2
ENSG00000166887	VPS39
ENSG00000134013	LOXL2
ENSG00000125266	EFNB2
ENSG00000055483	USP36
ENSG00000070770	CSNK2A2
ENSG00000166033	HTRA1
ENSG00000111859	NEDD9
ENSG00000167522	ANKRD11
ENSG00000117632	STMN1
ENSG00000163125	RPRD2
ENSG00000115946	PNO1
ENSG00000177731	FLII
ENSG00000198576	ARC
ENSG00000196449	YRDC
ENSG00000261796	ISY1-RAB43
ENSG00000164659	ELAPOR2
ENSG00000181827	RFX7
ENSG00000087302	RTRAF
ENSG00000149577	SIDT2
ENSG00000204104	TRAF3IP1
ENSG00000130803	ZNF317
ENSG00000136643	RPS6KC1
ENSG00000066926	FECH
ENSG00000100568	VTI1B
ENSG00000162144	CYB561A3
ENSG00000124207	CSE1L
ENSG00000134352	IL6ST
ENSG00000182247	UBE2E2
ENSG00000269113	TRABD2B
ENSG00000196562	SULF2
ENSG00000118985	ELL2
ENSG00000205133	TRIQK
ENSG00000109787	KLF3
ENSG00000171488	LRRC8C
ENSG00000157625	TAB3
ENSG00000099250	NRP1
ENSG00000131171	SH3BGRL
ENSG00000198918	RPL39
ENSG00000170522	ELOVL6
ENSG00000142784	WDTC1
ENSG00000105058	FAM32A
ENSG00000086475	SEPHS1
ENSG00000106683	LIMK1
ENSG00000182667	NTM
ENSG00000204252	HLA-DOA
ENSG00000143401	ANP32E
ENSG00000165006	UBAP1
ENSG00000146950	SHROOM2
ENSG00000067533	RRP15
ENSG00000116521	SCAMP3
ENSG00000165476	REEP3
ENSG00000205726	ITSN1
ENSG00000163590	PPM1L
ENSG00000143457	GOLPH3L
ENSG00000166326	TRIM44
ENSG00000196305	IARS1
ENSG00000112685	EXOC2
ENSG00000163820	FYCO1
ENSG00000123200	ZC3H13
ENSG00000097021	ACOT7
ENSG00000162735	PEX19
ENSG00000257365	FNTB
ENSG00000257365	CHURC1-FNTB
ENSG00000175582	RAB6A
ENSG00000166037	CEP57
ENSG00000145375	SPATA5
ENSG00000134769	DTNA
ENSG00000148730	EIF4EBP2
ENSG00000188612	SUMO2
ENSG00000176783	RUFY1
ENSG00000111052	LIN7A
ENSG00000144233	AMMECR1L
ENSG00000134970	TMED7
ENSG00000108960	MMD
ENSG00000137094	DNAJB5
ENSG00000129187	DCTD
ENSG00000124299	PEPD
ENSG00000114744	COMMD2
ENSG00000124571	XPO5
ENSG00000039560	RAI14
ENSG00000124789	NUP153
ENSG00000107937	GTPBP4
ENSG00000141568	FOXK2
ENSG00000048392	RRM2B
ENSG00000176155	CCDC57
ENSG00000156650	KAT6B
ENSG00000167971	CASKIN1
ENSG00000156970	BUB1B
ENSG00000188257	PLA2G2A
ENSG00000081154	PCNP
ENSG00000051382	PIK3CB
ENSG00000197265	GTF2E2
ENSG00000139826	ABHD13
ENSG00000138796	HADH
ENSG00000198843	SELENOT
ENSG00000164073	MFSD8
ENSG00000116774	OLFML3
ENSG00000159335	PTMS
ENSG00000070961	ATP2B1
ENSG00000196505	GDAP2
ENSG00000132912	DCTN4
ENSG00000163251	FZD5
ENSG00000054983	GALC
ENSG00000138622	HCN4
ENSG00000047056	WDR37
ENSG00000182134	TDRKH
ENSG00000138085	ATRAID
ENSG00000181773	GPR3
ENSG00000204120	GIGYF2
ENSG00000101474	APMAP
ENSG00000079313	REXO1
ENSG00000128567	PODXL
ENSG00000164366	CCDC127
ENSG00000122565	CBX3
ENSG00000174871	CNIH2
ENSG00000196177	ACADSB
ENSG00000148498	PARD3
ENSG00000133019	CHRM3
ENSG00000189184	PCDH18
ENSG00000152601	MBNL1
ENSG00000159388	BTG2
ENSG00000140525	FANCI
ENSG00000164649	CDCA7L
ENSG00000178425	NT5DC1
ENSG00000067082	KLF6
ENSG00000185189	NRBP2
ENSG00000125952	MAX
ENSG00000013306	SLC25A39
ENSG00000151422	FER
ENSG00000125398	SOX9
ENSG00000116747	RO60
ENSG00000187391	MAGI2
ENSG00000166575	TMEM135
ENSG00000172572	PDE3A
ENSG00000183597	TANGO2
ENSG00000143845	ETNK2
ENSG00000115194	SLC30A3
ENSG00000187398	LUZP2
ENSG00000116117	PARD3B
ENSG00000196937	FAM3C
ENSG00000144354	CDCA7
ENSG00000050344	NFE2L3
ENSG00000038382	TRIO
ENSG00000188938	FAM120AOS
ENSG00000085872	CHERP
ENSG00000106603	COA1
ENSG00000135250	SRPK2
ENSG00000187068	C3orf70
ENSG00000206538	VGLL3
ENSG00000171130	ATP6V0E2
ENSG00000117461	PIK3R3
ENSG00000119335	SET
ENSG00000151353	TMEM18
ENSG00000143870	PDIA6
ENSG00000134602	STK26
ENSG00000164754	RAD21
ENSG00000003056	M6PR
ENSG00000143375	CGN
ENSG00000117020	AKT3
ENSG00000166233	ARIH1
ENSG00000089094	KDM2B
ENSG00000170802	FOXN2
ENSG00000165495	PKNOX2
ENSG00000137497	NUMA1
ENSG00000196967	ZNF585A
ENSG00000183513	COA5
ENSG00000149798	CDC42EP2
ENSG00000120949	TNFRSF8
ENSG00000143222	UFC1
ENSG00000182768	NGRN
ENSG00000151413	NUBPL
ENSG00000132780	NASP
ENSG00000105438	KDELR1
ENSG00000164466	SFXN1
ENSG00000158966	CACHD1
ENSG00000164402	SEPTIN8
ENSG00000155966	AFF2
ENSG00000198715	GLMP
ENSG00000117114	ADGRL2
ENSG00000168005	SPINDOC
ENSG00000198856	OSTC
ENSG00000110841	PPFIBP1
ENSG00000205352	PRR13
ENSG00000112335	SNX3
ENSG00000177370	TIMM22
ENSG00000105401	CDC37
ENSG00000118160	SLC8A2
ENSG00000176749	CDK5R1
ENSG00000132842	AP3B1
ENSG00000176371	ZSCAN2
ENSG00000116852	KIF21B
ENSG00000171310	CHST11
ENSG00000198792	TMEM184B
ENSG00000171456	ASXL1
ENSG00000160888	IER2
ENSG00000072736	NFATC3
ENSG00000139722	VPS37B
ENSG00000179833	SERTAD2
ENSG00000171862	PTEN
ENSG00000188385	JAKMIP3
ENSG00000151445	VIPAS39
ENSG00000165929	TC2N
ENSG00000116667	C1orf21
ENSG00000205339	IPO7
ENSG00000140992	PDPK1
ENSG00000069849	ATP1B3
ENSG00000124782	RREB1
ENSG00000074201	CLNS1A
ENSG00000182318	ZSCAN22
ENSG00000164253	WDR41
ENSG00000100726	TELO2
ENSG00000163349	HIPK1
ENSG00000065243	PKN2
ENSG00000248383	PCDHAC1
ENSG00000211584	SLC48A1
ENSG00000101871	MID1
ENSG00000197121	PGAP1
ENSG00000109606	DHX15
ENSG00000160753	RUSC1
ENSG00000108523	RNF167
ENSG00000104131	EIF3J
ENSG00000189403	HMGB1
ENSG00000188786	MTF1
ENSG00000137992	DBT
ENSG00000180354	MTURN
ENSG00000155158	TTC39B
ENSG00000100528	CNIH1
ENSG00000100804	PSMB5
ENSG00000215717	TMEM167B
ENSG00000181450	ZNF678
ENSG00000164187	LMBRD2
ENSG00000108510	MED13
ENSG00000125107	CNOT1
ENSG00000168495	POLR3D
ENSG00000088280	ASAP3
ENSG00000221955	SLC12A8
ENSG00000118680	MYL12B
ENSG00000089060	SLC8B1
ENSG00000114423	CBLB
ENSG00000100926	TM9SF1
ENSG00000136378	ADAMTS7
ENSG00000118965	WDR35
ENSG00000076053	RBM7
ENSG00000251349	MSANTD3-TMEFF1
ENSG00000109956	B3GAT1
ENSG00000153310	CYRIB
ENSG00000241697	TMEFF1
ENSG00000096696	DSP
ENSG00000184602	SNN
ENSG00000158528	PPP1R9A
ENSG00000136802	LRRC8A
ENSG00000015133	CCDC88C
ENSG00000243725	TTC4
ENSG00000197798	FAM118B
ENSG00000109610	SOD3
ENSG00000108406	DHX40
ENSG00000186522	SEPTIN10
ENSG00000130590	SAMD10
ENSG00000033050	ABCF2
ENSG00000101843	PSMD10
ENSG00000185201	IFITM2
ENSG00000198780	FAM169A
ENSG00000166265	CYYR1
ENSG00000124155	PIGT
ENSG00000258429	PDF
ENSG00000204965	PCDHA5
ENSG00000160214	RRP1
ENSG00000115464	USP34
ENSG00000213593	TMX2
ENSG00000158615	PPP1R15B
ENSG00000170633	RNF34
ENSG00000080371	RAB21
ENSG00000165801	ARHGEF40
ENSG00000120265	PCMT1
ENSG00000134802	SLC43A3
ENSG00000112531	QKI
ENSG00000097033	SH3GLB1
ENSG00000025039	RRAGD
ENSG00000134690	CDCA8
ENSG00000172775	PSME3IP1
ENSG00000172466	ZNF24
ENSG00000132718	SYT11
ENSG00000091622	PITPNM3
ENSG00000189337	KAZN
ENSG00000135842	NIBAN1
ENSG00000242372	EIF6
ENSG00000040531	CTNS
ENSG00000243317	STMP1
ENSG00000052723	SIKE1
ENSG00000085063	CD59
ENSG00000147526	TACC1
ENSG00000145555	MYO10
ENSG00000261221	ZNF865
ENSG00000166341	DCHS1
ENSG00000099817	POLR2E
ENSG00000102870	ZNF629
ENSG00000164305	CASP3
ENSG00000156925	ZIC3
ENSG00000100979	PLTP
ENSG00000131669	NINJ1
ENSG00000151692	RNF144A
ENSG00000130477	UNC13A
ENSG00000043143	JADE2
ENSG00000138613	APH1B
ENSG00000068024	HDAC4
ENSG00000157617	C2CD2
ENSG00000048649	RSF1
ENSG00000011295	TTC19
ENSG00000115109	EPB41L5
ENSG00000141867	BRD4
ENSG00000102908	NFAT5
ENSG00000053770	AP5M1
ENSG00000072952	IRAG1
ENSG00000137944	KYAT3
ENSG00000101445	PPP1R16B
ENSG00000034053	APBA2
ENSG00000101146	RAE1
ENSG00000178104	PDE4DIP
ENSG00000070047	PHRF1
ENSG00000127995	CASD1
ENSG00000184489	PTP4A3
ENSG00000076706	MCAM
ENSG00000105726	ATP13A1
ENSG00000168118	RAB4A
ENSG00000143850	PLEKHA6
ENSG00000131759	RARA
ENSG00000130338	TULP4
ENSG00000182606	TRAK1
ENSG00000062194	GPBP1
ENSG00000138160	KIF11
ENSG00000165861	ZFYVE1
ENSG00000100345	MYH9
ENSG00000138430	OLA1
ENSG00000088899	LZTS3
ENSG00000090273	NUDC
ENSG00000106278	PTPRZ1
ENSG00000166225	FRS2
ENSG00000164692	COL1A2
ENSG00000185236	RAB11B
ENSG00000068366	ACSL4
ENSG00000174136	RGMB
ENSG00000177283	FZD8
ENSG00000159840	ZYX
ENSG00000133030	MPRIP
ENSG00000104763	ASAH1
ENSG00000174695	TMEM167A
ENSG00000062598	ELMO2
ENSG00000178695	KCTD12
ENSG00000171307	ZDHHC16
ENSG00000114933	INO80D
ENSG00000186951	PPARA
ENSG00000134909	ARHGAP32
ENSG00000065802	ASB1
ENSG00000111707	SUDS3
ENSG00000134709	HOOK1
ENSG00000008282	SYPL1
ENSG00000127511	SIN3B
ENSG00000185565	LSAMP
ENSG00000023171	GRAMD1B
ENSG00000114956	DGUOK
ENSG00000140022	STON2
ENSG00000103549	RNF40
ENSG00000148143	ZNF462
ENSG00000143569	UBAP2L
ENSG00000164292	RHOBTB3
ENSG00000175161	CADM2
ENSG00000104164	BLOC1S6
ENSG00000103150	MLYCD
ENSG00000166503	HDGFL3
ENSG00000116198	CEP104
ENSG00000165417	GTF2A1
ENSG00000164976	MYORG
ENSG00000115241	PPM1G
ENSG00000169925	BRD3
ENSG00000179958	DCTPP1
ENSG00000164032	H2AZ1
ENSG00000158417	EIF5B
ENSG00000010803	SCMH1
ENSG00000128944	KNSTRN
ENSG00000138413	IDH1
ENSG00000128849	CGNL1
ENSG00000108578	BLMH
ENSG00000157693	TMEM268
ENSG00000079819	EPB41L2
ENSG00000176887	SOX11
ENSG00000131089	ARHGEF9
ENSG00000124164	VAPB
ENSG00000141858	SAMD1
ENSG00000112941	TENT4A
ENSG00000040633	PHF23
ENSG00000125826	RBCK1
ENSG00000115504	EHBP1
ENSG00000101189	MRGBP
ENSG00000139719	VPS33A
ENSG00000164938	TP53INP1
ENSG00000100056	ESS2
ENSG00000166794	PPIB
ENSG00000112977	DAP
ENSG00000198742	SMURF1
ENSG00000163930	BAP1
ENSG00000181852	RNF41
ENSG00000028310	BRD9
ENSG00000115963	RND3
ENSG00000143847	PPFIA4
ENSG00000100503	NIN
ENSG00000086589	RBM22
ENSG00000171681	ATF7IP
ENSG00000163479	SSR2
ENSG00000068796	KIF2A
ENSG00000135365	PHF21A
ENSG00000159023	EPB41
ENSG00000092820	EZR
ENSG00000114812	VIPR1
ENSG00000181104	F2R
ENSG00000147862	NFIB
ENSG00000086289	EPDR1
ENSG00000177150	FAM210A
ENSG00000181744	DIPK2A
ENSG00000139405	RITA1
ENSG00000163956	LRPAP1
ENSG00000037637	FBXO42
ENSG00000163191	S100A11
ENSG00000125354	SEPTIN6
ENSG00000072364	AFF4
ENSG00000113328	CCNG1
ENSG00000145147	SLIT2
ENSG00000068489	PRR11
ENSG00000172216	CEBPB
ENSG00000095203	EPB41L4B
ENSG00000178568	ERBB4
ENSG00000084710	EFR3B
ENSG00000188171	ZNF626
ENSG00000146247	PHIP
ENSG00000071051	NCK2
ENSG00000035928	RFC1
ENSG00000214046	SMIM7
ENSG00000082258	CCNT2
ENSG00000009954	BAZ1B
ENSG00000183309	ZNF623
ENSG00000143363	PRUNE1
ENSG00000010270	STARD3NL
ENSG00000140474	ULK3
ENSG00000111725	PRKAB1
ENSG00000136051	WASHC4
ENSG00000197063	MAFG
ENSG00000157191	NECAP2
ENSG00000198160	MIER1
ENSG00000107949	BCCIP
ENSG00000177963	RIC8A
ENSG00000134755	DSC2
ENSG00000163812	ZDHHC3
ENSG00000181938	GINS3
ENSG00000147459	DOCK5
ENSG00000146216	TTBK1
ENSG00000162817	C1orf115
ENSG00000170325	PRDM10
ENSG00000048052	HDAC9
ENSG00000051825	MPHOSPH9
ENSG00000065328	MCM10
ENSG00000114686	MRPL3
ENSG00000185122	HSF1
ENSG00000123374	CDK2
ENSG00000125686	MED1
ENSG00000133731	IMPA1
ENSG00000130856	ZNF236
ENSG00000168268	NT5DC2
ENSG00000084652	TXLNA
ENSG00000088179	PTPN4
ENSG00000160213	CSTB
ENSG00000077157	PPP1R12B
ENSG00000160223	ICOSLG
ENSG00000198324	PHETA1
ENSG00000108639	SYNGR2
ENSG00000154124	OTULIN
ENSG00000143933	CALM2
ENSG00000120942	UBIAD1
ENSG00000183496	MEX3B
ENSG00000007923	DNAJC11
ENSG00000008324	SS18L2
ENSG00000176108	CHMP6
ENSG00000080824	HSP90AA1
ENSG00000175137	SH3BP5L
ENSG00000143190	POU2F1
ENSG00000157837	SPPL3
ENSG00000061794	MRPS35
ENSG00000100142	POLR2F
ENSG00000134222	PSRC1
ENSG00000107679	PLEKHA1
ENSG00000177479	ARIH2
ENSG00000136425	CIB2
ENSG00000131043	AAR2
ENSG00000106089	STX1A
ENSG00000182149	IST1
ENSG00000159618	ADGRG5
ENSG00000164031	DNAJB14
ENSG00000264364	DYNLL2
ENSG00000175387	SMAD2
ENSG00000136014	USP44
ENSG00000064961	HMG20B
ENSG00000152492	CCDC50
ENSG00000171045	TSNARE1
ENSG00000168566	SNRNP48
ENSG00000109670	FBXW7
ENSG00000114491	UMPS
ENSG00000107130	NCS1
ENSG00000196498	NCOR2
ENSG00000156675	RAB11FIP1
ENSG00000215012	RTL10
ENSG00000108349	CASC3
ENSG00000163624	CDS1
ENSG00000056586	RC3H2
ENSG00000165731	RET
ENSG00000087301	TXNDC16
ENSG00000132383	RPA1
ENSG00000136536	MARCHF7
ENSG00000117676	RPS6KA1
ENSG00000149289	ZC3H12C
ENSG00000058272	PPP1R12A
ENSG00000100147	CCDC134
ENSG00000177706	FAM20C
ENSG00000111615	KRR1
ENSG00000179431	FJX1
ENSG00000136111	TBC1D4
ENSG00000080189	SLC35C2
ENSG00000170445	HARS1
ENSG00000178177	LCORL
ENSG00000117640	MTFR1L
ENSG00000173905	GOLIM4
ENSG00000167797	CDK2AP2
ENSG00000065000	AP3D1
ENSG00000102606	ARHGEF7
ENSG00000139880	CDH24
ENSG00000174953	DHX36
ENSG00000106244	PDAP1
ENSG00000117877	POLR1G
ENSG00000182827	ACBD3
ENSG00000147050	KDM6A
ENSG00000108312	UBTF
ENSG00000126882	FAM78A
ENSG00000119403	PHF19
ENSG00000126970	ZC4H2
ENSG00000134852	CLOCK
ENSG00000101098	RIMS4
ENSG00000213516	RBMXL1
ENSG00000131437	KIF3A
ENSG00000165186	PTCHD1
ENSG00000105176	URI1
ENSG00000126883	NUP214
ENSG00000046889	PREX2
ENSG00000145780	FEM1C
ENSG00000126768	TIMM17B
ENSG00000143553	SNAPIN
ENSG00000151465	CDC123
ENSG00000157895	C12orf43
ENSG00000064300	NGFR
ENSG00000183955	KMT5A
ENSG00000106588	PSMA2
ENSG00000162971	TYW5
ENSG00000196476	C20orf96
ENSG00000182551	ADI1
ENSG00000123091	RNF11
ENSG00000132603	NIP7
ENSG00000158106	RHPN1
ENSG00000169744	LDB2
ENSG00000105325	FZR1
ENSG00000053372	MRTO4
ENSG00000103550	KNOP1
ENSG00000084774	CAD
ENSG00000129521	EGLN3
ENSG00000010610	CD4
ENSG00000005884	ITGA3
ENSG00000007545	CRAMP1
ENSG00000109189	USP46
ENSG00000147905	ZCCHC7
ENSG00000104365	IKBKB
ENSG00000124541	RRP36
ENSG00000087365	SF3B2
ENSG00000198517	MAFK
ENSG00000173575	CHD2
ENSG00000023734	STRAP
ENSG00000160218	TRAPPC10
ENSG00000106344	RBM28
ENSG00000105732	ZNF574
ENSG00000109079	TNFAIP1
ENSG00000075420	FNDC3B
ENSG00000102935	ZNF423
ENSG00000213465	ARL2
ENSG00000187109	NAP1L1
ENSG00000087152	ATXN7L3
ENSG00000131242	RAB11FIP4
ENSG00000163605	PPP4R2
ENSG00000086200	IPO11
ENSG00000086200	IPO11-LRRC70
ENSG00000108588	CCDC47
ENSG00000174306	ZHX3
ENSG00000101577	LPIN2
ENSG00000005889	ZFX
ENSG00000119866	BCL11A
ENSG00000063176	SPHK2
ENSG00000162836	ACP6
ENSG00000170759	KIF5B
ENSG00000169895	SYAP1
ENSG00000070718	AP3M2
ENSG00000154845	PPP4R1
ENSG00000171490	RSL1D1
ENSG00000129515	SNX6
ENSG00000101166	PRELID3B
ENSG00000136110	CNMD
ENSG00000177303	CASKIN2
ENSG00000135093	USP30
ENSG00000135870	RC3H1
ENSG00000153250	RBMS1
ENSG00000175928	LRRN1
ENSG00000092199	HNRNPC
ENSG00000130584	ZBTB46
ENSG00000127616	SMARCA4
ENSG00000165678	GHITM
ENSG00000080802	CNOT4
ENSG00000139496	NUP58
ENSG00000015171	ZMYND11
ENSG00000164300	SERINC5
ENSG00000188603	CLN3
ENSG00000159592	GPBP1L1
ENSG00000215021	PHB2
ENSG00000186866	POFUT2
ENSG00000189060	H1-0
ENSG00000182504	CEP97
ENSG00000182923	CEP63
ENSG00000242498	ARPIN
ENSG00000137776	SLTM
ENSG00000185515	BRCC3
ENSG00000198466	ZNF587
ENSG00000131100	ATP6V1E1
ENSG00000170677	SOCS6
ENSG00000146373	RNF217
ENSG00000167130	DOLPP1
ENSG00000120727	PAIP2
ENSG00000153443	UBALD1
ENSG00000187017	ESPN
ENSG00000121766	ZCCHC17
ENSG00000089818	NECAP1
ENSG00000169230	PRELID1
ENSG00000153113	CAST
ENSG00000140416	TPM1
ENSG00000149657	LSM14B
ENSG00000041802	LSG1
ENSG00000100266	PACSIN2
ENSG00000173542	MOB1B
ENSG00000134207	SYT6
ENSG00000185885	IFITM1
ENSG00000133935	ERG28
ENSG00000170004	CHD3
ENSG00000117036	ETV3
ENSG00000024526	DEPDC1
ENSG00000130713	EXOSC2
ENSG00000213551	DNAJC9
ENSG00000108468	CBX1
ENSG00000077454	LRCH4
ENSG00000160446	ZDHHC12
ENSG00000122705	CLTA
ENSG00000162174	ASRGL1
ENSG00000102100	SLC35A2
ENSG00000138623	SEMA7A
ENSG00000211455	STK38L
ENSG00000074590	NUAK1
ENSG00000116731	PRDM2
ENSG00000120963	ZNF706
ENSG00000005194	CIAPIN1
ENSG00000080603	SRCAP
ENSG00000188021	UBQLN2
ENSG00000145782	ATG12
ENSG00000010165	EEF1AKNMT
ENSG00000174738	NR1D2
ENSG00000107959	PITRM1
ENSG00000116871	MAP7D1
ENSG00000100296	THOC5
ENSG00000151458	ANKRD50
ENSG00000103942	HOMER2
ENSG00000167528	ZNF641
ENSG00000115216	NRBP1
ENSG00000197111	PCBP2
ENSG00000161082	CELF5
ENSG00000165175	MID1IP1
ENSG00000135924	DNAJB2
ENSG00000100364	KIAA0930
ENSG00000177469	CAVIN1
ENSG00000106554	CHCHD3
ENSG00000146676	PURB
ENSG00000184863	RBM33
ENSG00000185215	TNFAIP2
ENSG00000148700	ADD3
ENSG00000126746	ZNF384
ENSG00000160959	LRRC14
ENSG00000158435	CNOT11
ENSG00000079332	SAR1A
ENSG00000132879	FBXO44
ENSG00000143630	HCN3
ENSG00000126261	UBA2
ENSG00000058453	CROCC
ENSG00000114127	XRN1
ENSG00000204946	ZNF783
ENSG00000100897	DCAF11
ENSG00000173011	TADA2B
ENSG00000151746	BICD1
ENSG00000087502	ERGIC2
ENSG00000108861	DUSP3
ENSG00000185813	PCYT2
ENSG00000196586	MYO6
ENSG00000145020	AMT
ENSG00000159314	ARHGAP27
ENSG00000168724	DNAJC21
ENSG00000114503	NCBP2
ENSG00000142655	PEX14
ENSG00000170370	EMX2
ENSG00000080298	RFX3
ENSG00000137275	RIPK1
ENSG00000111011	RSRC2
ENSG00000149503	INCENP
ENSG00000118900	UBN1
ENSG00000121060	TRIM25
ENSG00000139437	TCHP
ENSG00000121413	ZSCAN18
ENSG00000119953	SMNDC1
ENSG00000114544	SLC41A3
ENSG00000167996	FTH1
ENSG00000079950	STX7
ENSG00000172728	FUT10
ENSG00000153046	CDYL
ENSG00000105327	BBC3
ENSG00000172115	CYCS
ENSG00000141380	SS18
ENSG00000197457	STMN3
ENSG00000160199	PKNOX1
ENSG00000144893	MED12L
ENSG00000167258	CDK12
ENSG00000155508	CNOT8
ENSG00000136897	MRPL50
ENSG00000151532	VTI1A
ENSG00000104728	ARHGEF10
ENSG00000107779	BMPR1A
ENSG00000166261	ZNF202
ENSG00000140807	NKD1
ENSG00000124171	PARD6B
ENSG00000166886	NAB2
ENSG00000183077	AFMID
ENSG00000064995	TAF11
ENSG00000114861	FOXP1
ENSG00000132254	ARFIP2
ENSG00000070756	PABPC1
ENSG00000135953	MFSD9
ENSG00000197037	ZSCAN25
ENSG00000215440	NPEPL1
ENSG00000187742	SECISBP2
ENSG00000196923	PDLIM7
ENSG00000105402	NAPA
ENSG00000241685	ARPC1A
ENSG00000151247	EIF4E
ENSG00000196700	ZNF512B
ENSG00000205531	NAP1L4
ENSG00000091164	TXNL1
ENSG00000176894	PXMP2
ENSG00000126464	PRR12
ENSG00000188735	TMEM120B
ENSG00000139154	AEBP2
ENSG00000173436	MICOS10
ENSG00000179632	MAF1
ENSG00000187713	TMEM203
ENSG00000140319	SRP14
ENSG00000138834	MAPK8IP3
ENSG00000130312	MRPL34
ENSG00000113456	RAD1
ENSG00000188647	PTAR1
ENSG00000088325	TPX2
ENSG00000189007	ADAT2
ENSG00000215883	CYB5RL
ENSG00000130703	OSBPL2
ENSG00000130703	LOC105369209
ENSG00000055950	MRPL43
ENSG00000107581	EIF3A
ENSG00000153832	FBXO36
ENSG00000114268	PFKFB4
ENSG00000184557	SOCS3
ENSG00000161980	POLR3K
ENSG00000131591	C1orf159
ENSG00000104369	JPH1
ENSG00000171680	PLEKHG5
ENSG00000055609	KMT2C
ENSG00000204256	BRD2
ENSG00000102781	KATNAL1
ENSG00000154839	SKA1
ENSG00000168395	ING5
ENSG00000173530	TNFRSF10D
ENSG00000175203	DCTN2
ENSG00000147536	GINS4
ENSG00000148343	MIGA2
ENSG00000214338	SOGA3
ENSG00000128594	LRRC4
ENSG00000143033	MTF2
ENSG00000182749	PAQR7
ENSG00000158863	FAM160B2
ENSG00000125901	MRPS26
ENSG00000142102	PGGHG
ENSG00000100027	YPEL1
ENSG00000118276	B4GALT6
ENSG00000134030	CTIF
ENSG00000142892	PIGK
ENSG00000172845	SP3
ENSG00000168040	FADD
ENSG00000235194	PPP1R3E
ENSG00000167103	PIP5KL1
ENSG00000031003	FAM13B
ENSG00000160200	CBS
ENSG00000164076	CAMKV
ENSG00000155980	KIF5A
ENSG00000071655	MBD3
ENSG00000140650	PMM2
ENSG00000006744	ELAC2
ENSG00000141682	PMAIP1
ENSG00000113387	SUB1
ENSG00000203880	PCMTD2
ENSG00000001461	NIPAL3
ENSG00000089116	LHX5
ENSG00000083307	GRHL2
ENSG00000113742	CPEB4
ENSG00000129084	PSMA1
ENSG00000228474	OST4
ENSG00000089063	TMEM230
ENSG00000143740	SNAP47
ENSG00000143878	RHOB
ENSG00000006715	VPS41
ENSG00000142534	RPS11
ENSG00000135801	TAF5L
ENSG00000134371	CDC73
ENSG00000071539	TRIP13
ENSG00000111361	EIF2B1
ENSG00000148719	DNAJB12
ENSG00000078142	PIK3C3
ENSG00000054277	OPN3
ENSG00000123562	MORF4L2
ENSG00000177380	PPFIA3
ENSG00000105127	AKAP8
ENSG00000111642	CHD4
ENSG00000160716	CHRNB2
ENSG00000163848	ZNF148
ENSG00000149557	FEZ1
ENSG00000149557	STT3A-AS1
ENSG00000135334	AKIRIN2
ENSG00000109103	UNC119
ENSG00000185298	CCDC137
ENSG00000186532	SMYD4
ENSG00000089327	FXYD5
ENSG00000138738	PRDM5
ENSG00000183431	SF3A3
ENSG00000049089	COL9A2
ENSG00000145293	ENOPH1
ENSG00000177084	POLE
ENSG00000133226	SRRM1
ENSG00000196642	RABL6
ENSG00000198435	NRARP
[truncated: 1,393 more rows]

## Sheet: Palanichamy et al. 2016, RS4
#B-ALL RS4, iCLIP, Palanichamy et al. 2016
ENSEMBL	SYMBOL
ENSG00000196581	AJAP1
ENSG00000171608	PIK3CD
ENSG00000132879	FBXO44
ENSG00000206737	RNVU1-18
ENSG00000179023	KLHDC7A
ENSG00000040487	SLC66A1
ENSG00000142676	RPL11
ENSG00000133226	SRRM1
ENSG00000162430	SELENON
ENSG00000198830	HMGN2
ENSG00000204138	PHACTR4
ENSG00000159023	EPB41
ENSG00000121774	KHDRBS1
ENSG00000162521	RBBP4
ENSG00000116497	S100PBP
ENSG00000054118	THRAP3
ENSG00000127603	MACF1
ENSG00000177181	RIMKLA
ENSG00000065978	YBX1
ENSG00000142937	RPS8
ENSG00000132780	NASP
ENSG00000162378	ZYG11B
ENSG00000185483	ROR1
ENSG00000201487	SNORD45B
ENSG00000142875	PRKACB
ENSG00000143013	LMO4
ENSG00000162664	ZNF326
ENSG00000122406	RPL5
ENSG00000117569	PTBP2
ENSG00000162695	SLC30A7
ENSG00000134186	PRPF38B
ENSG00000278249	SCARNA2
ENSG00000116473	RAP1A
ENSG00000116489	CAPZA1
ENSG00000143127	ITGA10
ENSG00000272196	H2AC19
ENSG00000203852	H3C15
ENSG00000184260	H2AC20
ENSG00000117360	PRPF3
ENSG00000163141	BNIPL
ENSG00000177954	RPS27
ENSG00000143515	ATP8B2
ENSG00000160785	SLC25A44
ENSG00000143190	POU2F1
ENSG00000007933	FMO3
ENSG00000076258	FMO4
ENSG00000117523	PRRC2C
ENSG00000116199	FAM20B
ENSG00000143337	TOR1AIP1
ENSG00000116747	RO60
ENSG00000081237	PTPRC
ENSG00000198700	IPO9
ENSG00000170075	GPR37L1
ENSG00000077157	PPP1R12B
ENSG00000198625	MDM4
ENSG00000162889	MAPKAPK2
ENSG00000162769	FLVCR1
ENSG00000117724	CENPF
ENSG00000162819	BROX
ENSG00000163041	H3-3A
ENSG00000181873	IBA57
ENSG00000162946	DISC1
ENSG00000152904	GGPS1
ENSG00000116984	MTR
ENSG00000198626	RYR2
ENSG00000162711	NLRP3
ENSG00000162722	TRIM58
ENSG00000127054	INTS11
ENSG00000242485	MRPL20
ENSG00000248333	CDK11B
ENSG00000227372	TP73-AS1
ENSG00000116251	RPL22
ENSG00000177000	MTHFR
ENSG00000179051	RCC2
ENSG00000077549	CAPZB
ENSG00000162545	CAMK2N1
ENSG00000127483	HP1BP3
ENSG00000117298	ECE1
ENSG00000125944	HNRNPR
ENSG00000188529	SRSF10
ENSG00000117614	SYF2
ENSG00000127423	AUNIP
ENSG00000117632	STMN1
ENSG00000158006	PAFAH2
ENSG00000197989	SNHG12
ENSG00000134644	PUM1
ENSG00000162520	SYNC
ENSG00000116560	SFPQ
ENSG00000204084	INPP5B
ENSG00000010803	SCMH1
ENSG00000198815	FOXJ3
ENSG00000200169	RNU5D-1
ENSG00000117425	PTCH2
ENSG00000117450	PRDX1
ENSG00000159592	GPBP1L1
ENSG00000154222	CC2D1B
ENSG00000085840	ORC1
ENSG00000081870	HSPB11
ENSG00000152763	DNAI4
ENSG00000142864	SERBP1
ENSG00000050628	PTGER3
ENSG00000132485	ZRANB2
ENSG00000153898	MCOLN2
ENSG00000023909	GCLM
ENSG00000117525	F3
ENSG00000137992	DBT
ENSG00000206585	RNVU1-7
ENSG00000207349	RNVU1-17
ENSG00000203814	H2BC18
ENSG00000203811	H3C14
ENSG00000203812	H2AC18
ENSG00000184270	H2AC21
ENSG00000163131	CTSS
ENSG00000143409	MINDY1
ENSG00000143549	TPM3
ENSG00000160691	SHC1
ENSG00000160767	FAM189B
ENSG00000132680	KHDC4
ENSG00000132716	DCAF8
ENSG00000158859	ADAMTS4
ENSG00000143156	NME7
ENSG00000169905	TOR1AIP2
ENSG00000159173	TNNI1
ENSG00000231871	IPO9-AS1
ENSG00000133059	DSTYK
ENSG00000069275	NUCKS1
ENSG00000154380	ENAH
ENSG00000143799	PARP1
ENSG00000116903	EXOC8
ENSG00000153187	HNRNPU
ENSG00000185420	SMYD3
ENSG00000048740	CELF2
ENSG00000099251	HSD17B7P2
ENSG00000165476	REEP3
ENSG00000096746	HNRNPH3
ENSG00000060339	CCAR1
ENSG00000156650	KAT6B
ENSG00000138326	RPS24
ENSG00000269609	RPARP-AS1
ENSG00000148842	CNNM2
ENSG00000196865	NHLRC2
ENSG00000151657	KIN
ENSG00000151461	UPF2
ENSG00000196693	ZNF33B
ENSG00000169813	HNRNPF
ENSG00000204176	SYT15
ENSG00000151150	ANK3
ENSG00000171988	JMJD1C
ENSG00000182771	GRID1
ENSG00000165863	C10orf82
ENSG00000107581	EIF3A
ENSG00000227165	WDR11-AS1
ENSG00000065154	OAT
ENSG00000188690	UROS
ENSG00000148773	MKI67
ENSG00000177600	RPLP2
ENSG00000110651	CD81
ENSG00000166441	RPL27A
ENSG00000166483	WEE1
ENSG00000070081	NUCB2
ENSG00000134333	LDHA
ENSG00000149100	EIF3M
ENSG00000135387	CAPRIN1
ENSG00000026508	CD44
ENSG00000166326	TRIM44
ENSG00000179241	LDLRAD3
ENSG00000186660	ZFP91
ENSG00000189057	FAM111B
ENSG00000166801	FAM111A
ENSG00000149483	TMEM138
ENSG00000243742	RPLP0P2
ENSG00000214756	CSKMT
ENSG00000126391	FRMD8
ENSG00000251562	MALAT1
ENSG00000173020	GRK2
ENSG00000172932	ANKRD13D
ENSG00000110075	PPP6R3
ENSG00000184154	LRTOMT
ENSG00000149273	RPS3
ENSG00000171204	TMEM126B
ENSG00000166004	CEP295
ENSG00000183644	HOATZ
ENSG00000095139	ARCN1
ENSG00000110395	CBL
ENSG00000154127	UBASH3B
ENSG00000109943	CRTAM
ENSG00000120457	KCNJ5
ENSG00000269821	KCNQ1OT1
ENSG00000175352	NRIP3
ENSG00000133812	SBF2
ENSG00000255823	MTRNR2L8
ENSG00000110321	EIF4G2
ENSG00000110693	SOX6
ENSG00000166689	PLEKHA7
ENSG00000110700	RPS13
ENSG00000176697	BDNF
ENSG00000167986	DDB1
ENSG00000149480	MTA2
ENSG00000177363	LRRN4CL
ENSG00000172757	CFL1
ENSG00000175538	KCNE3
ENSG00000174804	FZD4
ENSG00000109861	CTSC
ENSG00000168959	GRM5
ENSG00000210825	SNORA40
ENSG00000166012	TAF1D
ENSG00000149308	NPAT
ENSG00000178202	POGLUT3
ENSG00000110723	EXPH5
ENSG00000110777	POU2AF1
ENSG00000137713	PPP2R1B
ENSG00000255561	FDXACB1
ENSG00000109971	HSPA8
ENSG00000149557	FEZ1
ENSG00000010278	CD9
ENSG00000010292	NCAPD2
ENSG00000111640	GAPDH
ENSG00000238923	RNU7-1
ENSG00000111704	NANOG
ENSG00000084444	FAM234B
ENSG00000052126	PLEKHA5
ENSG00000172572	PDE3A
ENSG00000118308	IRAG2
ENSG00000211584	SLC48A1
ENSG00000123352	SPATS2
ENSG00000258057	BCDIN3D-AS1
ENSG00000063046	EIF4B
ENSG00000197111	PCBP2
ENSG00000135486	HNRNPA1
ENSG00000135437	RDH5
ENSG00000139531	SUOX
ENSG00000197728	RPS26
ENSG00000065361	ERBB3
ENSG00000229117	RPL41
ENSG00000061987	MON2
ENSG00000153179	RASSF3
ENSG00000135679	MDM2
ENSG00000111605	CPSF6
ENSG00000139291	TMEM19
ENSG00000173598	NUDT4
ENSG00000120802	TMPO
ENSG00000075089	ACTR6
ENSG00000120800	UTP20
ENSG00000166598	HSP90B1
ENSG00000179295	PTPN11
ENSG00000188735	TMEM120B
ENSG00000184445	KNTC1
ENSG00000183955	KMT5A
ENSG00000168778	TCTN2
ENSG00000184992	BRI3BP
ENSG00000247077	PGAM5
ENSG00000111642	CHD4
ENSG00000110852	CLEC2B
ENSG00000172243	CLEC7A
ENSG00000084463	WBP11
ENSG00000111348	ARHGDIB
ENSG00000111716	LDHB
ENSG00000111728	ST8SIA1
ENSG00000060982	BCAT1
ENSG00000139146	SINHCAF
ENSG00000151233	GXYLT1
ENSG00000015153	YAF2
ENSG00000111371	SLC38A1
ENSG00000134294	SLC38A2
ENSG00000139620	KANSL2
ENSG00000123416	TUBA1B
ENSG00000167552	TUBA1A
ENSG00000094916	CBX5
ENSG00000076108	BAZ2A
ENSG00000110955	ATP5F1B
ENSG00000110958	PTGES3
ENSG00000196531	NACA
ENSG00000166888	STAT6
ENSG00000135678	CPM
ENSG00000127329	PTPRB
ENSG00000187109	NAP1L1
ENSG00000058272	PPP1R12A
ENSG00000139323	POC1B
ENSG00000173588	CEP83
ENSG00000136026	CKAP4
ENSG00000089154	GCN1
ENSG00000089157	RPLP0
ENSG00000202538	RNU4-2
ENSG00000200795	RNU4-1
ENSG00000139719	VPS33A
ENSG00000090615	GOLGA3
ENSG00000151846	PABPC3
ENSG00000132964	CDK8
ENSG00000122026	RPL21
ENSG00000152520	PAN3
ENSG00000136159	NUDT15
ENSG00000176124	DLEU7-AS1
ENSG00000139675	HNRNPA1L2
ENSG00000169062	UPF3A
ENSG00000122025	FLT3
ENSG00000102781	KATNAL1
ENSG00000189403	HMGB1
ENSG00000120694	HSPH1
ENSG00000133083	DCLK1
ENSG00000120662	MTRF1
ENSG00000133112	TPT1
ENSG00000080618	CPB2
ENSG00000136167	LCP1
ENSG00000088386	SLC15A1
ENSG00000134884	ARGLU1
ENSG00000100823	APEX1
ENSG00000100836	PABPN1
ENSG00000259431	THTPA
ENSG00000151320	AKAP6
ENSG00000151327	FAM177A1
ENSG00000100941	PNN
ENSG00000276168	RN7SL1
ENSG00000165527	ARF6
ENSG00000139921	TMX1
ENSG00000248550	OTX2-AS1
ENSG00000125954	CHURC1-FNTB
ENSG00000100650	SRSF5
ENSG00000119707	RBM25
ENSG00000119596	YLPM1
ENSG00000119685	TTLL5
ENSG00000165934	CPSF2
ENSG00000100749	VRK1
ENSG00000100811	YY1
ENSG00000078304	PPP2R5C
ENSG00000185215	TNFAIP2
ENSG00000184990	SIVA1
ENSG00000100814	CCNB1IP1
ENSG00000277209	RPPH1
ENSG00000129566	TEP1
ENSG00000092199	HNRNPC
ENSG00000092201	SUPT16H
ENSG00000100813	ACIN1
ENSG00000215271	HOMEZ
ENSG00000184304	PRKD1
ENSG00000129480	DTD2
ENSG00000165389	SPTSSA
ENSG00000100906	NFKBIA
ENSG00000274012	RN7SL2
ENSG00000182521	TBPL2
ENSG00000139970	RTN1
ENSG00000100625	SIX4
ENSG00000185650	ZFP36L1
ENSG00000133983	COX16
ENSG00000100796	PPP4R3A
ENSG00000066427	ATXN3
ENSG00000100697	DICER1
ENSG00000080824	HSP90AA1
ENSG00000156411	ATP5MPL
ENSG00000185823	NPAP1
ENSG00000166068	SPRED1
ENSG00000187446	CHP1
ENSG00000247556	OIP5-AS1
ENSG00000137815	RTF1
ENSG00000166710	B2M
ENSG00000128849	CGNL1
ENSG00000255529	POLR2M
ENSG00000199568	RNU5A-1
ENSG00000137818	RPLP1
ENSG00000179361	ARID3B
ENSG00000140382	HMG20A
ENSG00000185787	MORF4L1
ENSG00000156232	WHAMM
ENSG00000140575	IQGAP1
ENSG00000140443	IGF1R
ENSG00000104067	TJP1
ENSG00000128881	TTBK2
ENSG00000140265	ZSCAN29
ENSG00000166762	CATSPER2
ENSG00000092439	TRPM7
ENSG00000128989	ARPP19
ENSG00000069974	RAB27A
ENSG00000261771	DNAAF4-CCPG1
ENSG00000137845	ADAM10
ENSG00000129003	VPS13C
ENSG00000174444	RPL4
ENSG00000140350	ANP32A
ENSG00000140374	ETFA
ENSG00000080644	CHRNA3
ENSG00000117899	MESD
ENSG00000182774	RPS17
ENSG00000250021	ARPIN-AP3S2
ENSG00000283597	FAM169B
ENSG00000131873	CHSY1
ENSG00000090565	RAB11FIP3
ENSG00000007541	PIGQ
ENSG00000206053	JPT2
ENSG00000140992	PDPK1
ENSG00000167978	SRRM2
ENSG00000085644	ZNF213
ENSG00000179583	CIITA
ENSG00000237515	SHISA9
ENSG00000175595	ERCC4
ENSG00000103534	TMC5
ENSG00000005187	ACSM3
ENSG00000175311	ANKS4B
ENSG00000103319	EEF2K
ENSG00000198064	NPIPB13
ENSG00000188322	SBK1
ENSG00000168488	ATXN2L
ENSG00000197471	SPN
ENSG00000103485	QPRT
ENSG00000103495	MAZ
ENSG00000132207	SLX1A
ENSG00000099377	HSD3B7
ENSG00000089280	FUS
ENSG00000140678	ITGAX
ENSG00000087253	LPCAT2
ENSG00000103021	CCDC113
ENSG00000102908	NFAT5
ENSG00000189091	SF3B3
ENSG00000135709	KIAA0513
ENSG00000131149	GSE1
ENSG00000197912	SPG7
ENSG00000167526	RPL13
ENSG00000223959	AFG3L1P
ENSG00000008710	PKD1
ENSG00000206630	SNORD60
ENSG00000232196	MTRNR2L4
ENSG00000167984	NLRC3
ENSG00000005339	CREBBP
ENSG00000103426	CORO7-PAM16
ENSG00000153443	UBALD1
ENSG00000133393	CEP20
ENSG00000170540	ARL6IP1
ENSG00000169246	NPIPB3
ENSG00000149922	TBX6
ENSG00000090238	YPEL3
ENSG00000169955	ZNF747
ENSG00000069329	VPS35
ENSG00000069345	DNAJA2
ENSG00000141098	GFOD2
ENSG00000223496	EXOSC6
ENSG00000157350	ST3GAL2
ENSG00000140836	ZFHX3
ENSG00000090863	GLG1
ENSG00000167522	ANKRD11
ENSG00000003249	DBNDD1
ENSG00000108963	DPH1
ENSG00000170175	CHRNB1
ENSG00000181222	POLR2A
ENSG00000170004	CHD3
ENSG00000187607	ZNF286A
ENSG00000175061	SNHG29
ENSG00000131899	LLGL1
ENSG00000256618	MTRNR2L1
ENSG00000198242	RPL23A
ENSG00000160551	TAOK1
ENSG00000283774	MIR632
ENSG00000270647	TAF15
ENSG00000275023	MLLT6
ENSG00000263818	RDM1P5
ENSG00000108298	RPL19
ENSG00000108349	CASC3
ENSG00000198863	RUNDC1
ENSG00000161649	CD300LG
ENSG00000108424	KPNB1
ENSG00000108848	LUC7L3
ENSG00000153944	MSI2
ENSG00000199753	SNORD104
ENSG00000154229	PRKCA
ENSG00000172809	RPL38
ENSG00000073350	LLGL2
ENSG00000199961	SNORD1B
ENSG00000187997	C17orf99
ENSG00000173821	RNF213
ENSG00000167693	NXN
ENSG00000108953	YWHAE
ENSG00000197879	MYO1C
ENSG00000186532	SMYD4
ENSG00000167721	TSR1
ENSG00000108518	PFN1
ENSG00000161929	SCIMP
ENSG00000200463	SNORD118
ENSG00000178977	LINC00324
ENSG00000161970	RPL26
ENSG00000189051	RNF222
ENSG00000179598	PLD6
ENSG00000249459	ZNF286B
ENSG00000109118	PHF12
ENSG00000196535	MYO18A
ENSG00000108256	NUFIP2
ENSG00000275152	CCL16
ENSG00000278259	MYO19
ENSG00000275066	SYNRG
ENSG00000125691	RPL23
ENSG00000161381	PLXDC1
ENSG00000141750	STAC2
ENSG00000131747	TOP2A
ENSG00000168259	DNAJC7
ENSG00000141699	RETREG3
ENSG00000108825	PTGES3L-AARSD1
ENSG00000267080	ASB16-AS1
ENSG00000154945	ANKRD40
ENSG00000136450	SRSF1
ENSG00000284353	MIR142
ENSG00000253506	NACA2
ENSG00000108654	DDX5
ENSG00000177885	GRB2
ENSG00000132475	H3-3B
ENSG00000092929	UNC13D
ENSG00000175931	UBE2O
ENSG00000161547	SRSF2
ENSG00000157637	SLC38A10
ENSG00000184009	ACTG1
ENSG00000182446	NPLOC4
ENSG00000183684	ALYREF
ENSG00000206418	RAB12
ENSG00000081913	PHLPP1
ENSG00000133313	CNDP2
ENSG00000101680	LAMA1
ENSG00000067900	ROCK1
ENSG00000141380	SS18
ENSG00000134762	DSC3
ENSG00000152229	PSTPIP2
ENSG00000215472	RPL17-C18orf32
ENSG00000265681	RPL17
ENSG00000196628	TCF4
ENSG00000171791	BCL2
ENSG00000119537	KDSR
ENSG00000178184	PARD6G
ENSG00000272055	RNU6-6P
ENSG00000172006	ZNF554
ENSG00000167670	CHAF1A
ENSG00000266983	LOC100128568
ENSG00000104880	ARHGEF18
ENSG00000099783	HNRNPM
ENSG00000188000	OR7D2
ENSG00000243207	PPAN-P2RY11
ENSG00000179218	CALR
ENSG00000179284	DAND5
ENSG00000105072	C19orf44
ENSG00000072954	TMEM38A
ENSG00000105393	BABAM1
ENSG00000160117	ANKLE1
ENSG00000130311	DDA1
ENSG00000167483	NIBAN3
ENSG00000130309	COLGALT1
ENSG00000099308	MAST3
ENSG00000221983	UBA52
ENSG00000105662	CRTC1
ENSG00000160352	ZNF714
ENSG00000257103	LSM14A
ENSG00000166398	GARRE1
ENSG00000251247	ZNF345
ENSG00000104825	NFKBIB
ENSG00000105323	HNRNPUL1
ENSG00000011478	QPCTL
ENSG00000105373	NOP53
ENSG00000178980	SELENOW
ENSG00000176920	FUT2
ENSG00000142541	RPL13A
ENSG00000142534	RPS11
ENSG00000105357	MYH14
ENSG00000105472	CLEC11A
ENSG00000179820	MYADM
ENSG00000167615	LENG8
ENSG00000186431	FCAR
ENSG00000108107	RPL28
ENSG00000198466	ZNF587
ENSG00000182318	ZSCAN22
ENSG00000071564	TCF3
ENSG00000167658	EEF2
ENSG00000167664	TMIGD2
ENSG00000088247	KHSRP
ENSG00000186994	KANK3
ENSG00000171466	ZNF562
ENSG00000242852	ZNF709
ENSG00000105576	TNPO2
ENSG00000127526	SLC35E1
ENSG00000105639	JAK3
ENSG00000196172	ZNF681
ENSG00000227392	HPN-AS1
ENSG00000267041	ZNF850
ENSG00000104824	HNRNPL
ENSG00000161243	FBXO27
ENSG00000128000	ZNF780B
ENSG00000124469	CEACAM8
ENSG00000167378	IRGQ
ENSG00000125741	OPA3
ENSG00000177051	FBXO46
ENSG00000125755	SYMPK
ENSG00000105281	SLC1A5
ENSG00000105438	KDELR1
ENSG00000105516	DBP
ENSG00000268006	PTOV1-AS1
ENSG00000204604	ZNF468
ENSG00000182986	ZNF320
ENSG00000142405	NLRP12
ENSG00000131042	LILRB2
ENSG00000187116	LILRA5
ENSG00000179873	NLRP11
ENSG00000181894	ZNF329
ENSG00000171848	RRM2
ENSG00000196208	GREB1
ENSG00000205639	MFSD2B
ENSG00000163811	WDR43
ENSG00000152683	SLC30A6
ENSG00000152689	RASGRP3
ENSG00000150938	CRIM1
ENSG00000138079	SLC3A1
ENSG00000115306	SPTBN1
ENSG00000237651	C2orf74
ENSG00000011523	CEP68
ENSG00000143995	MEIS1
ENSG00000169564	PCBP1
ENSG00000034510	TMSB10
ENSG00000168906	MAT2A
ENSG00000153561	RMND5A
ENSG00000071082	RPL31
ENSG00000071054	MAP4K4
ENSG00000264229	RNU4ATAC
ENSG00000136731	UGGT1
ENSG00000223760	MED15P9
ENSG00000138385	SSB
ENSG00000170144	HNRNPA3
ENSG00000115232	ITGA4
ENSG00000162999	DUSP19
ENSG00000115541	HSPE1
ENSG00000196141	SPATS2L
ENSG00000082153	BZW1
ENSG00000055044	NOP58
ENSG00000138439	FAM117B
ENSG00000138443	ABI2
ENSG00000114942	EEF1B2
ENSG00000197756	RPL37A
ENSG00000144567	RETREG2
ENSG00000067066	SP100
ENSG00000187514	PTMA
ENSG00000077044	DGKD
ENSG00000124831	LRRFIP1
ENSG00000168395	ING5
ENSG00000182551	ADI1
ENSG00000134308	YWHAQ
ENSG00000115758	ODC1
ENSG00000143870	PDIA6
ENSG00000055917	PUM2
ENSG00000143933	CALM2
ENSG00000115355	CCDC88A
ENSG00000082898	XPO1
ENSG00000197329	PELI1
ENSG00000198380	GFPT1
ENSG00000116001	TIA1
ENSG00000152291	TGOLN2
ENSG00000249884	RNF103-CHMP3
ENSG00000084090	STARD7
ENSG00000168758	SEMA4C
ENSG00000144218	AFF3
ENSG00000144057	ST6GAL2
ENSG00000286058	FAR2P1
ENSG00000163046	ANKRD30BL
ENSG00000169554	ZEB2
ENSG00000115947	ORC4
ENSG00000184898	RBM43
ENSG00000081479	LRP2
ENSG00000238133	MAP3K20-AS1
ENSG00000081320	STK17B
ENSG00000144381	HSPD1
ENSG00000162971	TYW5
ENSG00000003393	ALS2
ENSG00000114933	INO80D
ENSG00000178568	ERBB4
ENSG00000115053	NCL
ENSG00000101361	NOP56
ENSG00000101290	CDS2
ENSG00000172264	MACROD2
ENSG00000101003	GINS1
ENSG00000131061	ZNF341
ENSG00000125991	ERGIC3
ENSG00000118705	RPN2
ENSG00000198900	TOP1
ENSG00000177410	ZFAS1
ENSG00000124253	PCK1
ENSG00000124222	STX16
ENSG00000087460	GNAS
ENSG00000130703	OSBPL2
ENSG00000125835	SNRPB
ENSG00000185019	UBOX5
ENSG00000149451	ADAM33
ENSG00000259974	LINC00261
ENSG00000125977	EIF2S2
ENSG00000198646	NCOA6
ENSG00000131051	RBM39
ENSG00000101082	SLA2
ENSG00000149639	SOGA1
ENSG00000283440	LINC01260
ENSG00000256222	MTRNR2L3
ENSG00000101182	PSMA7
ENSG00000198276	UCKL1
ENSG00000170262	MRAP
ENSG00000182670	TTC3
ENSG00000160199	PKNOX1
ENSG00000160305	DIP2A
ENSG00000159216	RUNX1
ENSG00000160183	TMPRSS3
ENSG00000215193	PEX26
ENSG00000099901	RANBP1
ENSG00000167037	SGSM1
ENSG00000183762	KREMEN1
ENSG00000182944	EWSR1
ENSG00000253352	TUG1
ENSG00000100150	DEPDC5
ENSG00000100342	APOL1
ENSG00000100324	TAB1
ENSG00000196236	XPNPEP3
ENSG00000196419	XRCC6
ENSG00000100167	SEPTIN3
ENSG00000276027	RNU12
ENSG00000075240	GRAMD4
ENSG00000242259	C22orf39
ENSG00000070010	UFD1
ENSG00000184470	TXNRD2
ENSG00000100280	AP1B1
ENSG00000183530	PRR14L
ENSG00000100320	RBFOX2
ENSG00000100345	MYH9
ENSG00000213923	CSNK1E
ENSG00000100201	DDX17
ENSG00000100206	DMC1
ENSG00000184949	FAM227A
ENSG00000100316	RPL3
ENSG00000100380	ST13
ENSG00000100401	RANGAP1
ENSG00000235568	NFAM1
ENSG00000189306	RRP7A
ENSG00000100425	BRD1
ENSG00000134109	EDEM1
ENSG00000144554	FANCD2
ENSG00000134086	VHL
ENSG00000174748	RPL15
ENSG00000163527	STT3B
ENSG00000172995	ARPP21
ENSG00000188846	RPL14
ENSG00000114857	NKTR
ENSG00000003756	RBM5
ENSG00000163938	GNL3
ENSG00000157500	APPL1
ENSG00000163684	RPP14
ENSG00000181458	TMEM45A
ENSG00000177707	NECTIN3
ENSG00000151576	QTRT2
ENSG00000163714	U2SURP
ENSG00000152601	MBNL1
ENSG00000113810	SMC4
ENSG00000008952	SEC62
ENSG00000161202	DVL3
ENSG00000114867	EIF4G1
ENSG00000073803	MAP3K13
ENSG00000156976	EIF4A2
ENSG00000073849	ST6GAL1
ENSG00000145012	LPP
ENSG00000163964	PIGX
ENSG00000196220	SRGAP3
ENSG00000206562	METTL6
ENSG00000077097	TOP2B
ENSG00000229589	ACVR2B-AS1
ENSG00000173473	SMARCC1
ENSG00000187492	CDHR4
ENSG00000163946	TASOR
ENSG00000144749	LRIG1
ENSG00000163611	SPICE1
ENSG00000138496	PARP9
ENSG00000070476	ZXDC
ENSG00000138231	DBR1
ENSG00000114126	TFDP2
ENSG00000163646	CLRN1
ENSG00000186432	KPNA4
ENSG00000239219	LOC100128164
ENSG00000163918	RFC4
ENSG00000163961	RNF168
ENSG00000184985	SORCS2
ENSG00000109790	KLHL5
ENSG00000249348	UGDH-AS1
ENSG00000174799	CEP135
ENSG00000128050	PAICS
ENSG00000124882	EREG
ENSG00000138771	SHROOM3
ENSG00000172493	AFF1
ENSG00000151014	NOCT
ENSG00000172007	RAB33B
ENSG00000153147	SMARCA5
ENSG00000145425	RPS3A
ENSG00000109572	CLCN3
ENSG00000214367	HAUS3
ENSG00000163956	LRPAP1
ENSG00000178597	PSAPL1
ENSG00000163257	DCAF16
ENSG00000109819	PPARGC1A
ENSG00000181826	RELL1
ENSG00000109814	UGDH
ENSG00000163683	SMIM14
ENSG00000121892	PDS5A
ENSG00000145244	CORIN
ENSG00000145241	CENPC
ENSG00000083896	YTHDC1
ENSG00000138757	G3BP2
ENSG00000118816	CCNI
ENSG00000138668	HNRNPD
ENSG00000152795	HNRNPDL
ENSG00000145284	SCD5
ENSG00000251022	THAP9-AS1
ENSG00000145287	PLAC8
ENSG00000163644	PPM1K
ENSG00000138795	LEF1
ENSG00000138794	CASP6
ENSG00000145349	CAMK2D
ENSG00000171497	PPID
ENSG00000170088	TMEM192
ENSG00000164104	HMGB2
ENSG00000164303	ENPP6
ENSG00000153404	PLEKHG4B
ENSG00000145495	MARCHF6
ENSG00000154124	OTULIN
ENSG00000113361	CDH6
ENSG00000168724	DNAJC21
ENSG00000168685	IL7R
ENSG00000132357	CARD6
ENSG00000227908	FLJ31104
ENSG00000153914	SREK1
ENSG00000145675	PIK3R1
ENSG00000153044	CENPH
ENSG00000197822	OCLN
ENSG00000049883	PTCD2
ENSG00000122008	POLK
ENSG00000085365	SCAMP1
ENSG00000039319	ZFYVE16
ENSG00000172795	DCP2
ENSG00000164902	PHAX
ENSG00000113368	LMNB1
ENSG00000145833	DDX46
ENSG00000113658	SMAD5
ENSG00000015479	MATR3
ENSG00000113649	TCERG1
ENSG00000237693	IRGM
ENSG00000155511	GRIA1
ENSG00000155506	LARP1
ENSG00000181163	NPM1
ENSG00000127022	CANX
ENSG00000113456	RAD1
ENSG00000145592	RPL37
ENSG00000164181	ELOVL7
ENSG00000153006	SREK1IP1
ENSG00000197860	SGTB
ENSG00000183323	CCDC125
ENSG00000228716	DHFR
ENSG00000186468	RPS23
ENSG00000081189	MEF2C
ENSG00000185261	KIAA0825
ENSG00000113532	ST8SIA4
ENSG00000171444	MCC
ENSG00000152700	SAR1B
ENSG00000177733	HNRNPA0
ENSG00000113013	HSPA9
ENSG00000113068	PFDN1
ENSG00000131504	DIAPH1
ENSG00000019582	CD74
ENSG00000164330	EBF1
ENSG00000168246	UBTD2
ENSG00000087206	UIMC1
ENSG00000146094	DOK3
ENSG00000113262	GRM6
ENSG00000169045	HNRNPH1
ENSG00000204628	RACK1
ENSG00000180822	PSMG4
ENSG00000124766	SOX4
ENSG00000146047	H2BC1
ENSG00000278637	H4C1
ENSG00000287080	H3C3
ENSG00000168298	H1-4
ENSG00000158373	H2BC5
ENSG00000274290	H2BC6
ENSG00000277224	H2BC7
ENSG00000276966	H4C5
ENSG00000275713	H2BC9
ENSG00000196787	H2AC11
ENSG00000276180	H4C9
ENSG00000273703	H2BC14
ENSG00000197238	H4C11
ENSG00000274641	H2BC17
ENSG00000206503	HLA-A
ENSG00000204574	ABCF1
ENSG00000196230	TUBB
ENSG00000204516	MICB
ENSG00000204410	MSH5
ENSG00000204387	SNHG32
ENSG00000204287	HLA-DRA
ENSG00000204256	BRD2
ENSG00000137309	HMGA1
ENSG00000112033	PPARD
ENSG00000197753	LHFPL5
ENSG00000161912	ADCY10P1
ENSG00000137221	TJAP1
ENSG00000096384	HSP90AB1
ENSG00000202198	RN7SK
ENSG00000135299	ANKRD6
ENSG00000112306	RPS12
ENSG00000118513	MYB
ENSG00000135521	LTV1
ENSG00000118508	RAB32
ENSG00000111962	UST
ENSG00000131016	AKAP12
ENSG00000112038	OPRM1
ENSG00000124570	SERPINB6
ENSG00000124795	DEK
ENSG00000112308	C6orf62
ENSG00000278705	H4C2
ENSG00000286522	H3C2
ENSG00000276410	H2BC3
ENSG00000187837	H1-2
ENSG00000180596	H2BC4
ENSG00000277157	H4C4
ENSG00000197409	H3C4
ENSG00000273802	H2BC8
ENSG00000124575	H1-3
ENSG00000277775	H3C7
ENSG00000273983	H3C8
ENSG00000158406	H4C8
ENSG00000197903	H2BC12
ENSG00000185130	H2BC13
ENSG00000273542	H4C12
ENSG00000275221	H2AC15
ENSG00000184357	H1-5
ENSG00000275379	H3C11
ENSG00000278677	H2AC17
ENSG00000234745	HLA-B
ENSG00000198563	DDX39B
ENSG00000213676	ATF6B
ENSG00000204304	PBX2
ENSG00000164663	USP49
ENSG00000146070	PLA2G7
ENSG00000112118	MCM3
ENSG00000112144	CILK1
ENSG00000137270	GCM1
ENSG00000146166	LGSN
ENSG00000156508	EEF1A1
ENSG00000135316	SYNCRIP
ENSG00000111880	RNGTT
ENSG00000146263	MMS22L
ENSG00000132424	PNISR
ENSG00000085382	HACE1
ENSG00000112276	BVES
ENSG00000185250	PPIL6
ENSG00000196591	HDAC2
ENSG00000029363	BCLAF1
ENSG00000146414	SHPRH
ENSG00000131018	SYNE1
ENSG00000185345	PRKN
ENSG00000221740	SNORD93
ENSG00000136243	NUP42
ENSG00000188732	FAM221A
ENSG00000078549	ADCYAP1R1
ENSG00000065883	CDK13
ENSG00000196262	PPIA
ENSG00000136280	CCM2
ENSG00000179869	ABCA13
ENSG00000185811	IKZF1
ENSG00000106609	TMEM248
ENSG00000106682	EIF4H
ENSG00000174428	GTF2IRD2B
ENSG00000091073	DTX2
ENSG00000205485	LOC100133091
ENSG00000006634	DBF4
ENSG00000157259	GATAD1
ENSG00000127993	RBM48
ENSG00000106245	BUD31
ENSG00000197037	ZSCAN25
ENSG00000146828	SLC12A9
ENSG00000087087	SRRT
ENSG00000106366	SERPINE1
ENSG00000106400	ZNHIT1
ENSG00000160991	ORAI2
ENSG00000005483	KMT2E
ENSG00000128573	FOXP2
ENSG00000135269	TES
ENSG00000128578	STRIP2
ENSG00000157741	UBN2
ENSG00000146963	LUC7L2
ENSG00000260231	KDM7A-DT
ENSG00000090266	NDUFB2
ENSG00000270672	MTRNR2L6
ENSG00000229153	EPHA1-AS1
ENSG00000174469	CNTNAP2
ENSG00000252316	RNY4
ENSG00000106479	ZNF862
ENSG00000186480	INSIG1
ENSG00000075624	ACTB
ENSG00000122691	TWIST1
ENSG00000164649	CDCA7L
ENSG00000136231	IGF2BP3
ENSG00000164548	TRA2A
ENSG00000122566	HNRNPA2B1
ENSG00000106080	FKBP14
ENSG00000164542	KIAA0895
ENSG00000270617	URGCP-MRPS24
ENSG00000164744	SUN3
ENSG00000176826	FKBP9P1
ENSG00000146733	PSPH
ENSG00000213462	ERV3-1
ENSG00000009954	BAZ1B
ENSG00000049541	RFC2
ENSG00000196275	GTF2IRD2
ENSG00000075142	SRI
ENSG00000105810	CDK6
ENSG00000127922	SEM1
ENSG00000166508	MCM7
ENSG00000146830	GIGYF1
ENSG00000106436	MYL10
ENSG00000105887	LUZP6
ENSG00000146858	ZC3HAV1L
ENSG00000133624	ZNF767P
ENSG00000105983	LMBR1
ENSG00000147316	MCPH1
ENSG00000173273	TNKS
ENSG00000250305	TRMT9B
ENSG00000104635	SLC39A14
ENSG00000120913	PDLIM2
ENSG00000147536	GINS4
ENSG00000168172	HOOK3
ENSG00000104738	MCM4
ENSG00000215114	UBXN2B
ENSG00000164953	TMEM67
ENSG00000156162	DPY19L4
ENSG00000147649	MTDH
ENSG00000228224	NACA4P
ENSG00000136997	MYC
ENSG00000105339	DENND3
ENSG00000147408	CSGALNACT1
ENSG00000168078	PBK
ENSG00000253729	PRKDC
ENSG00000008988	RPS20
ENSG00000246430	LINC00968
ENSG00000165078	CPA6
ENSG00000137571	SLCO5A1
ENSG00000147604	RPL7
ENSG00000164751	PEX2
ENSG00000156103	MMP16
ENSG00000156467	UQCRB
ENSG00000156482	RPL30
ENSG00000156509	FBXO43
ENSG00000070756	PABPC1
ENSG00000164924	YWHAZ
ENSG00000104408	EIF3E
ENSG00000147677	EIF3H
ENSG00000164754	RAD21
ENSG00000136986	DERL1
ENSG00000168672	LRATD2
ENSG00000008513	ST3GAL1
ENSG00000080503	SMARCA2
ENSG00000240498	CDKN2B-AS1
ENSG00000122729	ACO1
ENSG00000086061	DNAJA1
ENSG00000159884	CCDC107
ENSG00000147905	ZCCHC7
ENSG00000198887	SMC5
ENSG00000155621	C9orf85
ENSG00000119125	GDA
ENSG00000187742	SECISBP2
ENSG00000175787	ZNF169
ENSG00000136938	ANP32B
ENSG00000185585	OLFML2A
ENSG00000136933	RABEPK
ENSG00000167081	PBX3
ENSG00000196814	MVB12B
ENSG00000136944	LMX1B
ENSG00000119335	SET
ENSG00000097007	ABL1
ENSG00000130723	PRRC2B
ENSG00000148303	RPL7A
ENSG00000196642	RABL6
ENSG00000183354	KIAA2026
ENSG00000164985	PSIP1
ENSG00000173068	BNC2
ENSG00000137154	RPS6
ENSG00000122692	SMU1
ENSG00000137073	UBAP2
ENSG00000269900	RMRP
ENSG00000196092	PAX5
ENSG00000165119	HNRNPK
ENSG00000083223	TUT7
ENSG00000090054	SPTLC1
ENSG00000196305	IARS1
ENSG00000106853	PTGR1
ENSG00000106948	AKNA
ENSG00000181634	TNFSF15
ENSG00000148219	ASTN2
ENSG00000056586	RC3H2
ENSG00000136942	RPL35
ENSG00000136935	GOLGA1
ENSG00000044574	HSPA5
ENSG00000197958	RPL12
ENSG00000167110	GOLGA2
ENSG00000148344	PTGES
ENSG00000187239	FNBP1
ENSG00000221676	RNU6ATAC
ENSG00000233016	SNHG7
ENSG00000267206	LCN6
ENSG00000205542	TMSB4X
ENSG00000169239	CA5B
ENSG00000130741	EIF2S3
ENSG00000165175	MID1IP1
ENSG00000124486	USP9X
ENSG00000171657	GPR82
ENSG00000184194	GPR173
ENSG00000090776	EFNB1
ENSG00000147140	NONO
ENSG00000147162	OGT
ENSG00000204131	NHSL2
ENSG00000241343	RPL36A
ENSG00000133135	RNF128
ENSG00000133138	TBC1D8B
ENSG00000125675	GRIA3
ENSG00000101972	STAG2
ENSG00000160131	VMA21
ENSG00000147403	RPL10
ENSG00000168939	SPRY3
ENSG00000169093	ASMTL
ENSG00000183943	PRKX
ENSG00000165192	ASB11
ENSG00000173674	EIF1AX
ENSG00000177189	RPS6KA3
ENSG00000174010	KLHL15
ENSG00000102230	PCYT1B
ENSG00000072501	SMC1A
ENSG00000256045	MTRNR2L10
ENSG00000229807	XIST
ENSG00000102158	MAGT1
ENSG00000018610	CXorf56
ENSG00000056277	ZNF280C
ENSG00000213468	FIRRE
ENSG00000129680	MAP7D3
ENSG00000147274	RBMX
ENSG00000172534	HCFC1
ENSG00000215580	BCORP1

[truncated: 3 more sheets: Palanichamy et al. 2016, Reh, Ennajdaoui et al. 2016, PDAC, ENCODE]
